# Supplementary material
Source: PubMed Central journal article supplement (PMC2940467)
Supplement: me.2009-0381_1.pdf [file me.2009-0381_1.pdf]

| SYMBOL        | Dox Avg | Dox/basal | D/B SD | ACCESSION   |
|---------------|---------|-----------|--------|-------------|
| Sipi          | 6819    | 11.74     | 5.44   | NM_011414.1 |
| Wfdc1         | 465     | 4.69      | 2.27   | NM_023395.1 |
| LOC547160     | 213     | 4.62      | 0.37   |             |
| Kb36          | 795     | 4.27      | 0.68   | NM_212485   |
| 1700012L04Rik | 211     | 4.24      | 0.64   | XM_141617.1 |
| 2310058A03Rik | 128     | 3.91      | 1.25   | AK009971    |
| Krt73         | 2465    | 3.83      | 1.15   |             |
| A030010B05Rik | 141     | 3.64      | 4.66   | NM_030100.2 |
| E130112E08Rik | 12601   | 3.56      | 1.37   | AK053583    |
| Aqp1          | 2813    | 3.41      | 0.51   | NM_007472.1 |
| Cck           | 341     | 3.41      | 2.77   | NM_031161.1 |
| Dhrs6         | 113     | 3.39      | 1.35   | NM_027208.1 |
| Sepw1         | 2148    | 3.23      | 2.87   | NM_009156.1 |
| Hist1h2ah     | 5235    | 3.22      | 2.56   | NM_175659.1 |
| Hist1h2ak     | 6224    | 3.19      | 2.66   | NM_178183.1 |
| Hist1h2ad     | 4657    | 3.16      | 2.33   | NM_178188.1 |
| Hist1h2ai     | 13415   | 3.10      | 1.90   | NM_178182.1 |
| 2610019E17Rik | 1134    | 3.04      | 1.10   |             |
| Hist1h2an     | 8076    | 3.03      | 1.89   | NM_178184.1 |
| Dmkn          | 388     | 3.03      | 0.69   |             |
| Hist1h2ao     | 25358   | 3.00      | 2.08   | NM_178185.1 |
| Hist1h2ag     | 8541    | 2.99      | 1.90   | NM_178186.1 |
| Mt3           | 604     | 2.95      | 2.33   | NM_013603.1 |
| Hist2h2ac     | 23674   | 2.92      | 1.93   | NM_175662   |
| Hist1h2af     | 15197   | 2.86      | 1.81   | NM_175661.1 |
| Ninj1         | 65      | 2.84      | 1.95   | NM_013610.1 |
| 5430432H19Rik | 211     | 2.83      | 0.35   |             |
| 4933401B08Rik | 269     | 2.83      | 0.84   | AK077074    |
| LOC329521     | 80      | 2.78      | 1.17   | XM_194054.2 |
| 2010100O12Rik | 900     | 2.74      | 1.40   | NM_025946.2 |
| Lgals3        | 868     | 2.66      | 0.74   | NM_010705.1 |
| Pdia5         | 97      | 2.63      | 1.77   |             |
| Atp5k         | 73      | 2.60      | 0.75   | AK011342    |
| Calca         | 543     | 2.58      | 0.62   | NM_007587.1 |
| Hist2h2ab     | 299     | 2.58      | 1.61   | NM_178213.2 |
| LOC382128     | 303     | 2.55      | 1.35   | XM_356225.1 |
| 1700022J01Rik | 114     | 2.55      | 0.43   | AK006243    |
| Pcp2          | 335     | 2.54      | 0.67   | NM_008790.1 |
| 1110001J03Rik | 3148    | 2.53      | 0.48   | NM_025363.2 |
| Bola2         | 4684    | 2.52      | 1.25   |             |
| 2900093K20Rik | 366     | 2.52      | 0.74   | XM_488984   |
| 2010204K13Rik | 154     | 2.50      | 0.72   | NM_023450.2 |
| mt-Nd5        | 1265    | 2.49      | 0.73   |             |
| 2210008N01Rik | 1047    | 2.49      | 1.21   |             |
| A630084D02Rik | 3200    | 2.47      | 0.74   | AK042346    |
| Tnfrsf12a     | 1415    | 2.47      | 1.39   | NM_013749.1 |
| Myl4          | 374     | 2.46      | 0.69   | NM_010858.3 |
| 4930506F14Rik | 99      | 2.46      | 1.33   |             |
| 1700084E18Rik | 339     | 2.46      | 1.02   |             |
| 0610007J10Rik | 2365    | 2.46      | 1.66   | AK018717    |
| 1700016J18Rik | 143     | 2.42      | 0.89   |             |
| 1810044D09Rik | 114     | 2.42      | 0.90   |             |
| 4921536K21Rik | 75      | 2.41      | 0.95   | NM_026150   |
| LOC228715     | 2861    | 2.41      | 1.10   | XM_149199.3 |
| 5830454E08Rik | 617     | 2.41      | 0.63   | XM_486270   |
| 1810032O08Rik | 1050    | 2.41      | 0.97   | NM_025472.2 |
| 2310057K05Rik | 450     | 2.41      | 1.22   | AK009963    |
| Fkbp11        | 710     | 2.41      | 1.39   | NM_024169.2 |
| Psmb10        | 270     | 2.40      | 0.89   | NM_013640.1 |
| Hist2h2aa2    | 9897    | 2.40      | 1.26   | NM_178212.1 |
| Ybx3          | 1964    | 2.39      | 0.21   | AK029441    |
| Pvalb         | 342     | 2.39      | 0.70   | NM_013645.2 |
| 1810058M03Rik | 460     | 2.39      | 1.08   | AK007898    |
| Cklf          | 299     | 2.36      | 0.64   |             |
| 1810020D17Rik | 336     | 2.35      | 0.84   | NM_183251.2 |
| 2610200O14Rik | 480     | 2.35      | 1.21   | AK011854    |
| Metrn         | 538     | 2.33      | 1.57   | NM_133719   |

|                 |       |      |      |             |  |
|-----------------|-------|------|------|-------------|--|
| Mrps28          | 1546  | 2.33 | 1.75 | NM_025434.2 |  |
| A230051N06Rik   | 51    | 2.33 | 1.76 |             |  |
| A930005H10Rik   | 386   | 2.31 | 1.26 |             |  |
| E430031D18Rik   | 1773  | 2.31 | 0.78 | AK088915    |  |
| Prima1          | 784   | 2.31 | 0.87 | NM_178023.1 |  |
| Vgf             | 3014  | 2.31 | 1.36 |             |  |
| 2410006H16Rik   | 1656  | 2.31 | 0.83 |             |  |
| 1700007K13Rik   | 261   | 2.30 | 0.93 | XM_130125.3 |  |
| Emp3            | 730   | 2.30 | 0.92 | NM_010129.1 |  |
| Ndufa3          | 5560  | 2.30 | 0.62 | NM_025348   |  |
| B2m             | 643   | 2.30 | 0.87 | NM_009735.2 |  |
| Polr2l          | 19692 | 2.29 | 0.78 |             |  |
| 2900083l11Rik   | 227   | 2.29 | 1.83 |             |  |
| Atox1           | 4478  | 2.28 | 0.51 | NM_009720.2 |  |
| Pdap1           | 4492  | 2.28 | 1.00 | XM_132501.2 |  |
| scl0003300.1_40 | 117   | 2.28 | 1.29 |             |  |
| Csnk2a1-rs3     | 582   | 2.28 | 1.15 | AK031617    |  |
| 2210411K11Rik   | 3565  | 2.27 | 0.89 | XM_355846   |  |
| Npm3-ps1        | 6922  | 2.27 | 0.55 |             |  |
| 1500034E06Rik   | 2490  | 2.26 | 1.01 | XM_487174   |  |
| 2700023E23Rik   | 65    | 2.25 | 0.95 |             |  |
| Ier3            | 486   | 2.25 | 0.62 | NM_133662.1 |  |
| LOC381578       | 119   | 2.25 | 1.77 | XM_355538.1 |  |
| 2310010J17Rik   | 69    | 2.24 | 0.87 |             |  |
| Rnu65           | 168   | 2.24 | 0.97 |             |  |
| 5133401N09Rik   | 642   | 2.24 | 0.36 | NM_198004   |  |
| Bloc1s2         | 1192  | 2.23 | 0.92 | XM_193940.2 |  |
| 3100002J23Rik   | 4169  | 2.23 | 0.58 | XM_484029   |  |
| 1700054E11Rik   | 568   | 2.23 | 0.56 |             |  |
| Lgals1          | 1892  | 2.22 | 0.93 | NM_008495.1 |  |
| 2010321I05Rik   | 1111  | 2.22 | 0.72 |             |  |
| 3000003G13Rik   | 1529  | 2.22 | 0.81 | AK019042    |  |
| Npm3            | 2584  | 2.21 | 0.61 | NM_008723.1 |  |
| C330013J21Rik   | 269   | 2.21 | 0.37 | XM_110478.3 |  |
| 1500012F01Rik   | 2556  | 2.21 | 0.53 |             |  |
| 1500011K16Rik   | 2064  | 2.21 | 0.67 | NM_175125.2 |  |
| AA589584        | 3031  | 2.20 | 1.02 | XM_146606.3 |  |
| B230327L12Rik   | 844   | 2.20 | 0.75 | AK045964    |  |
| A230106F01Rik   | 73    | 2.20 | 1.25 | AK020716    |  |
| A930025J12Rik   | 3461  | 2.20 | 0.16 | NM_173734   |  |
| 1700008B15Rik   | 100   | 2.20 | 0.69 | XM_485370   |  |
| Al527266        | 80    | 2.19 | 1.87 | XM_132830.4 |  |
| Ube2c           | 59    | 2.18 | 1.81 | NM_026785.1 |  |
| Gamt            | 296   | 2.18 | 1.13 | NM_010255.1 |  |
| 2010012C16Rik   | 274   | 2.18 | 1.05 | NM_025564.1 |  |
| Ndufa2          | 7322  | 2.18 | 0.80 | NM_010885.2 |  |
| 9430081H08Rik   | 158   | 2.18 | 0.81 |             |  |
| LOC333137       | 58    | 2.18 | 1.82 | XM_285957.2 |  |
| Znhit1          | 2242  | 2.17 | 1.34 | XM_357515.1 |  |
| Gadd45g         | 1373  | 2.17 | 0.53 | NM_011817.1 |  |
| LOC381795       | 852   | 2.17 | 1.15 | XM_355797.1 |  |
| 1190002F15Rik   | 1771  | 2.17 | 0.65 |             |  |
| Ndufb7          | 689   | 2.17 | 0.49 | NM_025843.1 |  |
| Gm561           | 2568  | 2.17 | 0.55 |             |  |
| Serf2           | 5439  | 2.16 | 0.66 | NM_011354.1 |  |
| Edf1            | 3004  | 2.16 | 0.86 | NM_021519.1 |  |
| 2310024N18Rik   | 789   | 2.16 | 0.65 |             |  |
| A730063M14Rik   | 601   | 2.15 | 0.28 |             |  |
| scl0002069.1_48 | 95    | 2.15 | 0.31 |             |  |
| 1190017O12Rik   | 5499  | 2.15 | 0.79 | NM_138743.1 |  |
| 2310016E02Rik   | 3027  | 2.14 | 0.81 | NM_024460   |  |
| 2600009K23Rik   | 115   | 2.14 | 0.91 | AK011173    |  |
| Dbi             | 4976  | 2.14 | 0.69 | NM_007830.2 |  |
| Sprr1a          | 550   | 2.13 | 0.91 | NM_009264.1 |  |
| 1700081D05Rik   | 109   | 2.13 | 1.08 | AK006963    |  |
| LOC233080       | 248   | 2.12 | 0.77 | XM_145470.1 |  |
| Anapc13         | 4071  | 2.12 | 0.74 | NM_181394.1 |  |
| 2900016B01Rik   | 711   | 2.12 | 0.77 |             |  |

|                 |       |      |      |             |  |
|-----------------|-------|------|------|-------------|--|
| Tgm2            | 647   | 2.12 | 0.51 | AK054108    |  |
| D11Bwg0434e     | 1963  | 2.12 | 0.97 | NM_173742.1 |  |
| 2310007A19Rik   | 2385  | 2.11 | 0.58 | NM_025506   |  |
| Ppp1r14a        | 367   | 2.11 | 0.64 | NM_026731.2 |  |
| C130032F08Rik   | 106   | 2.11 | 0.35 | NM_173429.1 |  |
| LOC380871       | 351   | 2.11 | 1.22 | XM_354775.1 |  |
| Mapbpip-pending | 1160  | 2.11 | 0.80 | AK008395    |  |
| 111003314Rik    | 69    | 2.10 | 1.42 | XM_126635.1 |  |
| C920007D24Rik   | 96    | 2.10 | 0.77 | AK050589    |  |
| LOC381319       | 269   | 2.10 | 0.73 | XM_355268.1 |  |
| Lsm8            | 2656  | 2.10 | 0.71 | NM_133939.1 |  |
| 2210039O17Rik   | 122   | 2.10 | 0.41 | AK019056    |  |
| Ly6e            | 2023  | 2.10 | 0.96 | NM_008529   |  |
| 2610029K11Rik   | 139   | 2.10 | 1.44 |             |  |
| 6330562C20Rik   | 195   | 2.10 | 0.88 | XM_358602.1 |  |
| D430001F17Rik   | 92    | 2.10 | 0.80 |             |  |
| 5430416N02Rik   | 1997  | 2.10 | 1.06 |             |  |
| LOC383706       | 222   | 2.10 | 1.07 | XM_357197.1 |  |
| LOC381401       | 100   | 2.09 | 1.25 | XM_358566.1 |  |
| Psm8            | 490   | 2.09 | 0.47 | NM_010724.1 |  |
| EG434760        | 797   | 2.09 | 0.66 |             |  |
| 1700026B20Rik   | 1453  | 2.09 | 0.62 |             |  |
| 1810037G04Rik   | 1328  | 2.09 | 0.83 | XM_131044.2 |  |
| LOC622404       | 1616  | 2.09 | 0.51 |             |  |
| Dpm3            | 2200  | 2.08 | 0.52 | XM_130951.1 |  |
| 4930565G20Rik   | 63    | 2.08 | 1.34 | AK016228    |  |
| LOC382819       | 222   | 2.08 | 0.20 | XM_356697.1 |  |
| Rnu6            | 14133 | 2.08 | 0.50 |             |  |
| 1600023A02Rik   | 19752 | 2.08 | 0.59 | NM_026323.1 |  |
| 2700094K13Rik   | 8510  | 2.08 | 0.47 |             |  |
| 1110002M09Rik   | 14020 | 2.08 | 0.70 | XM_129957.1 |  |
| Eif4e2          | 363   | 2.07 | 1.11 |             |  |
| 1110020P15Rik   | 12847 | 2.07 | 0.53 | NM_197979.1 |  |
| Cib1            | 1825  | 2.07 | 0.96 | NM_011870.2 |  |
| Mrpl12          | 6021  | 2.07 | 0.98 | NM_027204.2 |  |
| LOC384161       | 687   | 2.07 | 0.52 | XM_357456.1 |  |
| Qprt            | 817   | 2.07 | 0.62 | NM_133686.1 |  |
| 5730588I11Rik   | 470   | 2.07 | 0.71 | AK019977    |  |
| 2900060N12Rik   | 449   | 2.07 | 0.40 | NM_183095.1 |  |
| 2310005L22Rik   | 1748  | 2.07 | 0.73 |             |  |
| 3110001D03Rik   | 4975  | 2.06 | 0.80 | NM_025849.2 |  |
| Ndufa5          | 3789  | 2.06 | 0.61 | NM_026614.1 |  |
| Bax             | 883   | 2.06 | 0.81 | NM_007527.2 |  |
| C230055K21Rik   | 302   | 2.06 | 1.16 | AK082487    |  |
| 1810027O10Rik   | 3961  | 2.05 | 0.72 | XM_109683.4 |  |
| 2810417K24Rik   | 1177  | 2.05 | 0.87 | AK013109    |  |
| 2310045B01Rik   | 728   | 2.05 | 0.63 | NM_025538.1 |  |
| 9530055J05Rik   | 70    | 2.05 | 0.66 | AK020610    |  |
| Nme1            | 39499 | 2.05 | 0.67 | NM_008704.2 |  |
| 2010107H07Rik   | 3802  | 2.05 | 1.11 | XM_354800.1 |  |
| LOC224048       | 8780  | 2.04 | 0.67 | XM_148246.1 |  |
| Tmem126a        | 2356  | 2.04 | 1.08 |             |  |
| Tmsb10          | 3136  | 2.04 | 1.59 | NM_025284.2 |  |
| Mrpl34          | 2803  | 2.04 | 0.44 | NM_053162.1 |  |
| D030019N20Rik   | 42    | 2.04 | 1.93 | AK050786    |  |
| 4932441N08Rik   | 297   | 2.04 | 0.66 | AK016562    |  |
| LOC225897       | 640   | 2.04 | 0.59 | XM_148897.3 |  |
| 3110004H13Rik   | 535   | 2.04 | 0.78 | NM_026068.1 |  |
| 2810410D24Rik   | 412   | 2.03 | 0.51 |             |  |
| Rpl18           | 8858  | 2.03 | 1.11 | NM_009077.1 |  |
| Ptges2          | 241   | 2.03 | 0.68 | NM_133783.1 |  |
| 1700001C14Rik   | 154   | 2.03 | 0.69 | NM_029295.1 |  |
| 1500001E21Rik   | 272   | 2.03 | 0.54 |             |  |
| LOC381439       | 1601  | 2.03 | 0.78 | XM_355397.1 |  |
| Timm8b          | 3382  | 2.03 | 0.88 | NM_013897.1 |  |
| LOC226654       | 72    | 2.02 | 0.98 | XM_129558.2 |  |
| Ly96            | 772   | 2.02 | 0.60 | NM_016923.1 |  |
| BC056474        | 540   | 2.02 | 1.08 |             |  |

|                |       |      |      |             |  |
|----------------|-------|------|------|-------------|--|
| Nfic           | 231   | 2.02 | 1.72 | NM_008688.2 |  |
| 5330439M10Rik  | 420   | 2.02 | 0.39 | NM_183132.1 |  |
| Mrps21         | 1317  | 2.02 | 0.65 | NM_078479.2 |  |
| Sssca1         | 1971  | 2.02 | 0.52 | NM_020491.3 |  |
| Defb25         | 182   | 2.02 | 0.40 |             |  |
| Tnnc1          | 288   | 2.02 | 1.14 | NM_009393.1 |  |
| Haao           | 92    | 2.02 | 1.15 | XM_354652   |  |
| Snrpg          | 5692  | 2.02 | 0.60 | NM_026506   |  |
| 2210008F06Rik  | 78    | 2.02 | 0.78 |             |  |
| Mrpl52         | 2432  | 2.01 | 0.46 | NM_026851.1 |  |
| 1700023F06Rik  | 1894  | 2.01 | 0.55 | XM_126649.3 |  |
| Ndufc2         | 3361  | 2.01 | 0.81 | NM_024220.1 |  |
| 1500031H01Rik  | 41    | 2.01 | 2.02 | XM_358753   |  |
| Mrps24         | 6160  | 2.01 | 0.65 | NM_026080.1 |  |
| Rpl38          | 29666 | 2.01 | 0.30 | NM_023372.1 |  |
| Cox8a          | 15460 | 2.00 | 0.72 | NM_007750.1 |  |
| Etfb           | 4531  | 2.00 | 0.80 | NM_026695.2 |  |
| Heg1           | 136   | 2.00 | 0.37 |             |  |
| LOC230075      | 8908  | 2.00 | 1.00 | XM_131359.5 |  |
| Ppih           | 812   | 2.00 | 0.68 | NM_028677   |  |
| 4930572J05Rik  | 808   | 2.00 | 1.00 | NM_198607.1 |  |
| H2-D1          | 4006  | 2.00 | 0.82 | NM_010380.2 |  |
| scl0004166.1_8 | 223   | 2.00 | 0.47 |             |  |
| 2310003F16Rik  | 4936  | 2.00 | 0.56 | NM_026318.1 |  |
| Ddc8           | 112   | 2.00 | 0.93 | NM_021440.1 |  |
| 2400010C15Rik  | 16067 | 2.00 | 0.55 | AK010307    |  |
| 1810006K21Rik  | 4567  | 1.99 | 0.25 | XM_207074   |  |
| 2410015N17Rik  | 3004  | 1.99 | 0.63 | NM_023203.1 |  |
| Asna1          | 1583  | 1.99 | 1.74 | NM_019652   |  |
| Ndufa6         | 2283  | 1.99 | 0.72 | AK080809    |  |
| Mrps34         | 3394  | 1.99 | 0.37 | NM_023260.1 |  |
| 6530437J22Rik  | 72    | 1.99 | 0.14 |             |  |
| D130027M04Rik  | 153   | 1.99 | 0.87 | XM_359251.1 |  |
| D10Ert322e     | 5321  | 1.99 | 0.73 | NM_026065.2 |  |
| Rpl26          | 16458 | 1.99 | 0.52 | NM_009080   |  |
| Rpl36a         | 5621  | 1.99 | 0.98 | NM_019865.2 |  |
| Cox7a1         | 634   | 1.99 | 0.39 | NM_009944.2 |  |
| Cldn3          | 2836  | 1.99 | 0.89 | NM_009902.2 |  |
| Cox6b          | 16617 | 1.99 | 0.58 | NM_025628.1 |  |
| 1600014C23Rik  | 255   | 1.98 | 0.62 | XM_128667.1 |  |
| Csnk2a1-rs4    | 95    | 1.98 | 0.65 | AK011501    |  |
| 1700021F05Rik  | 2355  | 1.98 | 0.55 | NM_026411.1 |  |
| Dnajc19        | 2283  | 1.98 | 0.66 |             |  |
| 2310016M24Rik  | 6322  | 1.98 | 0.91 | NM_183256.1 |  |
| 2010110M21Rik  | 8522  | 1.98 | 0.90 | NM_025933.1 |  |
| 2900010M23Rik  | 16183 | 1.98 | 0.49 | NM_026063.1 |  |
| Rangnrf        | 1410  | 1.98 | 1.00 | NM_021329.1 |  |
| 1190007F08Rik  | 1448  | 1.98 | 0.65 |             |  |
| Lag3           | 214   | 1.98 | 0.72 | NM_008479.1 |  |
| C230095J06Rik  | 184   | 1.98 | 0.28 | AK049052    |  |
| Polr2i         | 1949  | 1.98 | 0.57 | XM_133304.4 |  |
| B230369L08Rik  | 396   | 1.98 | 0.78 | NM_194342   |  |
| 1500004F05Rik  | 484   | 1.98 | 0.56 |             |  |
| 1110021J02Rik  | 316   | 1.98 | 0.30 |             |  |
| 2010004M13Rik  | 1622  | 1.98 | 0.66 |             |  |
| 2400003B06Rik  | 5066  | 1.97 | 0.44 | NM_026211.1 |  |
| Mopt           | 189   | 1.97 | 0.96 | NM_194269.1 |  |
| 1700086L19Rik  | 5802  | 1.97 | 0.49 | XM_358420.1 |  |
| 1700113I22Rik  | 131   | 1.97 | 0.99 | NM_026865.1 |  |
| LOC382061      | 1922  | 1.97 | 0.62 | XM_356141.1 |  |
| 2610036L11Rik  | 2419  | 1.97 | 0.56 | XM_488549   |  |
| Sncg           | 91    | 1.97 | 0.84 | NM_011430.1 |  |
| 2310030G09Rik  | 244   | 1.96 | 0.95 |             |  |
| Fxyd3          | 106   | 1.96 | 0.47 | NM_008557.1 |  |
| Uqcr           | 16975 | 1.96 | 0.47 | NM_025650.1 |  |
| 5033425B17Rik  | 11684 | 1.96 | 0.66 | NM_027215   |  |
| Sec61b         | 1469  | 1.96 | 0.62 | NM_024171.1 |  |
| Mrpl55         | 600   | 1.96 | 0.56 | NM_026035.1 |  |

|                 |       |      |      |             |  |
|-----------------|-------|------|------|-------------|--|
| E430039I23Rik   | 4702  | 1.96 | 0.40 | AK089103    |  |
| 1110020N13Rik   | 71    | 1.96 | 0.82 | AK003877    |  |
| scl0003187.1_40 | 1607  | 1.96 | 0.67 |             |  |
| LOC380906       | 270   | 1.95 | 1.00 | XM_354819.1 |  |
| LOC226740       | 3117  | 1.95 | 0.91 | XM_129643.4 |  |
| Atp5j2          | 12154 | 1.95 | 0.42 | NM_020582.1 |  |
| LOC381865       | 6453  | 1.95 | 0.58 | XM_355879.1 |  |
| 1700029P11Rik   | 483   | 1.95 | 0.80 | NM_025503.1 |  |
| C030034I22Rik   | 119   | 1.95 | 0.94 | XM_488832   |  |
| Reprimo         | 1164  | 1.95 | 0.34 | NM_023396.3 |  |
| A630040A01Rik   | 329   | 1.95 | 1.10 | AK041811    |  |
| Rpl30           | 2221  | 1.95 | 0.71 | NM_009083.2 |  |
| Rpl29           | 5182  | 1.95 | 0.47 | NM_009082.2 |  |
| Fau             | 20484 | 1.95 | 0.48 | NM_007990   |  |
| 4930563B10Rik   | 749   | 1.95 | 0.81 |             |  |
| LOC380775       | 38717 | 1.95 | 0.71 | XM_354686.1 |  |
| Ndufa4          | 9329  | 1.95 | 0.75 | NM_010886.1 |  |
| 9530058B02Rik   | 345   | 1.95 | 0.76 | NM_026633.1 |  |
| Wfdc12          | 15623 | 1.95 | 0.53 | NM_138684.2 |  |
| 1110038B12Rik   | 987   | 1.95 | 0.92 | XM_359415.1 |  |
| Rplp2           | 5248  | 1.94 | 0.71 | AK012402    |  |
| Prf1            | 758   | 1.94 | 0.31 | NM_011073.2 |  |
| Sec61g          | 7743  | 1.94 | 0.75 | XM_122171.1 |  |
| 3830402I07Rik   | 65    | 1.94 | 0.50 | AK076179    |  |
| 6330548G22Rik   | 258   | 1.94 | 0.28 | NM_029532.2 |  |
| Rps8            | 29579 | 1.94 | 0.92 | NM_009098.2 |  |
| Ifi30           | 754   | 1.94 | 0.74 | NM_023065.2 |  |
| LOC381142       | 80    | 1.94 | 0.66 | XM_355058.1 |  |
| 2310009A05Rik   | 3703  | 1.93 | 0.76 |             |  |
| Mrpl33          | 9598  | 1.93 | 0.53 | NM_025796.1 |  |
| Atp5g1          | 17144 | 1.93 | 0.58 | NM_007506.2 |  |
| Synpo           | 1537  | 1.93 | 0.04 | XM_129030.3 |  |
| Al481750        | 61    | 1.93 | 0.34 | NM_145473.1 |  |
| B130065G19Rik   | 288   | 1.93 | 0.46 | AK045321    |  |
| D8Erttd738e     | 1905  | 1.93 | 0.30 |             |  |
| 2610510L01Rik   | 262   | 1.93 | 0.88 | NM_026015.1 |  |
| C730025P13Rik   | 1129  | 1.93 | 0.61 | NM_177344   |  |
| 0710001D07Rik   | 167   | 1.93 | 0.54 |             |  |
| 0910001L09Rik   | 5838  | 1.93 | 0.60 | XM_132434.2 |  |
| Hist1h3a        | 73    | 1.93 | 0.73 |             |  |
| 2310016C08Rik   | 1154  | 1.93 | 0.85 | NM_023516.3 |  |
| Ccdc124         | 321   | 1.93 | 1.11 |             |  |
| Sct             | 4680  | 1.92 | 0.76 | NM_011328.1 |  |
| Mrps16          | 1438  | 1.92 | 0.47 | NM_025440.1 |  |
| 9430008C03Rik   | 3657  | 1.92 | 0.53 | XM_149251.3 |  |
| 1100001I22Rik   | 8873  | 1.92 | 0.58 | XM_485311   |  |
| Psme2           | 704   | 1.92 | 0.63 | NM_011190.2 |  |
| Mrpl40          | 5204  | 1.92 | 0.79 | NM_010922.1 |  |
| 0610006K04Rik   | 1489  | 1.92 | 0.73 | NM_026675.1 |  |
| Ndufs6          | 10355 | 1.92 | 0.68 |             |  |
| Dpcr1           | 73    | 1.92 | 0.82 |             |  |
| LOC383897       | 1319  | 1.92 | 0.80 | XM_357315.1 |  |
| Snrpd1          | 6118  | 1.92 | 0.62 | NM_009226.2 |  |
| Ndufs7          | 4825  | 1.92 | 0.92 | NM_029272.1 |  |
| Grim19          | 20531 | 1.92 | 0.41 | NM_023312.1 |  |
| Dcxr            | 291   | 1.92 | 0.85 | NM_026428.1 |  |
| 1500032D16Rik   | 8058  | 1.92 | 0.51 | NM_030087.1 |  |
| A530065H22Rik   | 2061  | 1.92 | 0.94 | AK041036    |  |
| 4931428F04Rik   | 588   | 1.92 | 0.57 | AK016481    |  |
| Pfn1            | 2629  | 1.91 | 1.36 | NM_011072.2 |  |
| LOC224137       | 2149  | 1.91 | 0.72 | XM_148086.4 |  |
| LOC241621       | 7580  | 1.91 | 0.72 | XM_141310.3 |  |
| Ndufb4          | 211   | 1.91 | 0.73 | XM_148372.1 |  |
| Hrc             | 163   | 1.91 | 0.64 | NM_010473.1 |  |
| 1110008P14Rik   | 2838  | 1.91 | 0.77 | NM_198001.1 |  |
| 2310006E12Rik   | 5357  | 1.91 | 0.29 |             |  |
| Rpl35           | 18863 | 1.91 | 0.85 | NM_025592   |  |
| 2010316F05Rik   | 614   | 1.91 | 1.31 | NM_026465.1 |  |

|               |       |      |      |             |  |
|---------------|-------|------|------|-------------|--|
| LOC228787     | 102   | 1.91 | 0.22 | XM_141539.2 |  |
| Trip10        | 141   | 1.91 | 0.87 | NM_134125.1 |  |
| B430105G09Rik | 438   | 1.91 | 0.69 |             |  |
| Mrps18c       | 4541  | 1.91 | 0.59 | XM_194230.3 |  |
| Ssr4          | 18543 | 1.91 | 0.70 | NM_009279   |  |
| Siat8e        | 121   | 1.91 | 0.58 | NM_013666.1 |  |
| Pfdn2         | 10337 | 1.91 | 0.71 | NM_011070.2 |  |
| LOC219215     | 214   | 1.91 | 0.49 | XM_139164.2 |  |
| Cox17         | 11637 | 1.91 | 0.50 |             |  |
| LOC381292     | 9037  | 1.91 | 0.71 | XM_355233.1 |  |
| Al842788      | 483   | 1.91 | 1.13 | NM_198616.1 |  |
| MGC18837      | 1302  | 1.90 | 0.66 | NM_178577.3 |  |
| Mrpl17        | 7369  | 1.90 | 0.43 | NM_025301.1 |  |
| Nme2          | 7115  | 1.90 | 0.74 | NM_008705.3 |  |
| Rpl11         | 32260 | 1.90 | 0.59 | NM_025919   |  |
| A730098P15    | 271   | 1.90 | 0.59 | NM_177589.2 |  |
| Al839550      | 249   | 1.90 | 0.82 | NM_198027.2 |  |
| Mrpl14        | 3232  | 1.90 | 1.04 | NM_026732.2 |  |
| LOC383077     | 215   | 1.90 | 1.12 | XM_356845.1 |  |
| Rpl28         | 8804  | 1.90 | 1.04 | NM_009081   |  |
| Tomm7         | 4349  | 1.90 | 0.54 | NM_025394   |  |
| 2410075B13Rik | 628   | 1.90 | 0.11 | NM_146059.1 |  |
| Ndufa8        | 6010  | 1.90 | 0.81 | NM_026703.1 |  |
| LOC381448     | 9318  | 1.89 | 0.83 | XM_355403.1 |  |
| 5830415L20Rik | 361   | 1.89 | 0.53 | NM_026583.2 |  |
| Mt2           | 329   | 1.89 | 0.83 | NM_008630.1 |  |
| Rpl12         | 13129 | 1.89 | 0.54 | NM_009076   |  |
| 1500010M16Rik | 3713  | 1.89 | 1.32 | NM_026892.1 |  |
| Ormdl3        | 5891  | 1.89 | 0.86 | NM_025661.1 |  |
| Lsm5          | 1433  | 1.89 | 0.63 | NM_025520   |  |
| 1810017G16Rik | 4262  | 1.89 | 0.96 | NM_021502.1 |  |
| Krt10         | 1262  | 1.89 | 1.06 |             |  |
| Surb7         | 1434  | 1.89 | 0.78 | NM_025315.1 |  |
| Uqcrh         | 18183 | 1.89 | 0.59 | NM_025641.2 |  |
| Siva          | 3823  | 1.89 | 0.85 | NM_013929   |  |
| Mrpl46        | 3211  | 1.89 | 0.76 | NM_023331.2 |  |
| Ddx3y         | 199   | 1.88 | 0.23 | NM_012008.1 |  |
| Srd5a1        | 116   | 1.88 | 0.72 | NM_175283.2 |  |
| 2310047C17Rik | 613   | 1.88 | 0.45 | NM_175108.2 |  |
| Ndufa1        | 18073 | 1.88 | 0.44 | NM_019443.1 |  |
| D730003H15Rik | 261   | 1.88 | 1.15 |             |  |
| Fxc1          | 1251  | 1.88 | 0.61 | NM_019502.2 |  |
| Lynx1         | 749   | 1.88 | 0.11 | NM_011838.2 |  |
| LOC384214     | 145   | 1.88 | 2.14 | XM_357493.1 |  |
| LOC225033     | 7213  | 1.88 | 0.50 | XM_128785.2 |  |
| Lsm10         | 2400  | 1.88 | 0.71 | NM_138721.1 |  |
| LOC230896     | 526   | 1.87 | 0.37 | XM_124427.4 |  |
| LOC383775     | 438   | 1.87 | 0.71 | XM_357238.1 |  |
| LOC383964     | 7739  | 1.87 | 0.45 | XM_357352.1 |  |
| Rps19         | 14912 | 1.87 | 0.35 | NM_023133   |  |
| LOC243268     | 732   | 1.87 | 0.69 | XM_144526.3 |  |
| Cox7c         | 11550 | 1.87 | 0.57 | NM_007749.1 |  |
| D2Erttd217e   | 515   | 1.87 | 0.52 |             |  |
| Cxx1a         | 229   | 1.87 | 1.70 |             |  |
| LOC382127     | 13701 | 1.87 | 0.77 | XM_356224.1 |  |
| LOC270037     | 13340 | 1.87 | 0.66 | XM_193374.2 |  |
| Mrpl23        | 5315  | 1.87 | 0.67 | NM_011288.1 |  |
| Banf1         | 1927  | 1.87 | 0.65 | NM_011793.2 |  |
| Snrpd2        | 13847 | 1.87 | 0.58 | XM_133225.1 |  |
| Tmem85        | 5139  | 1.87 | 0.87 |             |  |
| Nenf          | 3375  | 1.87 | 0.40 |             |  |
| Rps25         | 16712 | 1.86 | 0.31 | NM_024266   |  |
| LOC383139     | 407   | 1.86 | 0.31 | XM_356895.1 |  |
| Hist1h2bh     | 235   | 1.86 | 0.74 | NM_178197.1 |  |
| Deadc1        | 752   | 1.86 | 0.44 | NM_025748.2 |  |
| Ndufb8        | 5420  | 1.86 | 0.42 | NM_026061   |  |
| 0610012G03Rik | 3559  | 1.86 | 0.32 | NM_025320   |  |
| Rps17         | 29942 | 1.86 | 0.38 | NM_009092.2 |  |

|               |       |      |      |             |  |
|---------------|-------|------|------|-------------|--|
| LOC385822     | 206   | 1.86 | 1.22 | XM_358959.1 |  |
| Trim47        | 162   | 1.86 | 0.77 | NM_172570.2 |  |
| Atp5e         | 400   | 1.86 | 0.72 | NM_025983.2 |  |
| LOC236223     | 149   | 1.86 | 0.45 | XM_135563.3 |  |
| Hadh2         | 2754  | 1.86 | 0.61 | NM_016763.1 |  |
| S100a13       | 759   | 1.86 | 0.83 | NM_009113.2 |  |
| Rps27l        | 21381 | 1.85 | 0.95 | NM_026467.1 |  |
| U2af1         | 520   | 1.85 | 0.56 | NM_024187   |  |
| Gmfg          | 150   | 1.85 | 0.28 | NM_022024.1 |  |
| Gng2          | 510   | 1.85 | 0.66 | NM_010315.2 |  |
| LOC271041     | 269   | 1.85 | 0.42 | XM_194853.2 |  |
| Rps15         | 8671  | 1.85 | 0.54 | NM_009091.1 |  |
| Eif4ebp1      | 8889  | 1.85 | 0.84 | NM_007918.2 |  |
| Sap30l        | 7166  | 1.85 | 0.49 |             |  |
| LOC381046     | 9370  | 1.85 | 0.72 | XM_354963.1 |  |
| E130104I10Rik | 120   | 1.85 | 0.88 | AK053516    |  |
| Rpl37         | 17117 | 1.85 | 0.43 | NM_026069.1 |  |
| Rpl23a        | 16520 | 1.85 | 0.67 | NM_207523   |  |
| Lor           | 1767  | 1.85 | 0.74 | NM_008508.1 |  |
| LOC381683     | 1753  | 1.85 | 0.40 | XM_355658.1 |  |
| A630091F01Rik | 162   | 1.85 | 0.30 | AK042432    |  |
| Adpn          | 233   | 1.85 | 0.62 | NM_054088   |  |
| Mrpl27        | 1925  | 1.85 | 0.43 | NM_053161.2 |  |
| C730015A04Rik | 244   | 1.85 | 1.01 | NM_177788.2 |  |
| Dusp2         | 158   | 1.85 | 0.64 | NM_010090.2 |  |
| Tuba6         | 3306  | 1.85 | 0.29 | XM_147357.1 |  |
| Spcs1         | 5456  | 1.85 | 1.05 |             |  |
| Cbr1          | 1499  | 1.85 | 0.52 | NM_007620.1 |  |
| 1810063B07Rik | 3627  | 1.85 | 0.68 | XM_484351   |  |
| Rasl2-9       | 110   | 1.84 | 0.57 | NM_009028.1 |  |
| Gm69l         | 113   | 1.84 | 0.85 | NM_198627.1 |  |
| Rnpc2         | 195   | 1.84 | 0.54 | NM_133242.1 |  |
| Obfc2b        | 714   | 1.84 | 1.45 |             |  |
| Znhit3        | 1589  | 1.84 | 0.57 |             |  |
| Deb1          | 8373  | 1.84 | 0.41 | NM_026794.2 |  |
| Mrpl11        | 1118  | 1.84 | 0.73 | NM_025553.1 |  |
| Plekhj1       | 414   | 1.84 | 1.46 | NM_023900.1 |  |
| LOC382423     | 1883  | 1.84 | 0.58 | XM_356498.1 |  |
| Rpgrip1       | 303   | 1.84 | 0.72 | AK086397    |  |
| Sf3b5         | 3092  | 1.84 | 0.71 | NM_175102.2 |  |
| Irgm          | 11144 | 1.84 | 0.20 |             |  |
| Adrm1         | 3268  | 1.84 | 0.94 | NM_019822.2 |  |
| Phf5a         | 8659  | 1.84 | 0.37 | NM_026737.1 |  |
| 1810054G18Rik | 95    | 1.84 | 0.54 | NM_029377.1 |  |
| D630036F01Rik | 184   | 1.84 | 0.66 | AK085510    |  |
| 1110018N20Rik | 68    | 1.84 | 0.94 |             |  |
| Uxt           | 1844  | 1.84 | 0.62 | AK038495    |  |
| Mapbpip       | 961   | 1.84 | 0.47 | NM_031248.3 |  |
| Rpp38         | 584   | 1.84 | 0.74 | XM_130010.3 |  |
| 6430559E15Rik | 217   | 1.84 | 0.90 | XM_131537.4 |  |
| Cox4i1        | 19430 | 1.83 | 0.72 | NM_009941.1 |  |
| Rpl39         | 26507 | 1.83 | 0.24 | NM_026055.1 |  |
| 2810428I15Rik | 1491  | 1.83 | 0.43 | XM_147329.1 |  |
| 2310005N03Rik | 2096  | 1.83 | 0.80 | NM_025511.1 |  |
| 2010107E04Rik | 16318 | 1.83 | 0.58 | NM_027360.1 |  |
| Rpo1-3        | 6464  | 1.83 | 0.81 | NM_009087.1 |  |
| 2010203O07Rik | 161   | 1.83 | 0.63 | XM_131409.3 |  |
| LOC237512     | 8966  | 1.83 | 0.48 | XM_137226.3 |  |
| AU016977      | 768   | 1.83 | 0.88 | NM_175016.1 |  |
| LOC381215     | 1389  | 1.83 | 0.87 | XM_355149.1 |  |
| Crif1         | 1606  | 1.83 | 0.70 | NM_018827.1 |  |
| BC046418      | 115   | 1.83 | 0.41 | XM_140553.3 |  |
| RPS18         | 6735  | 1.83 | 0.49 | NM_011296.1 |  |
| Slc6a13       | 1500  | 1.83 | 0.65 | NM_144512.1 |  |
| Ifitm1        | 574   | 1.83 | 0.85 | NM_026820.2 |  |
| Rps26         | 28020 | 1.83 | 0.75 | NM_013765   |  |
| 2010003O02Rik | 293   | 1.83 | 0.65 |             |  |
| 2810432D09Rik | 2093  | 1.83 | 0.72 | NM_027278.1 |  |

|                  |       |      |      |             |  |
|------------------|-------|------|------|-------------|--|
| Slc11a1          | 756   | 1.83 | 0.24 | NM_013612.1 |  |
| B930041F14Rik    | 1993  | 1.83 | 0.33 | NM_178699   |  |
| Lsm3             | 1792  | 1.83 | 0.49 | NM_026309.1 |  |
| scl0001849.1_227 | 115   | 1.83 | 0.27 |             |  |
| 1500032L24Rik    | 3763  | 1.83 | 0.74 | XM_193800.2 |  |
| 1810037J08Rik    | 2824  | 1.83 | 0.77 | AK007723    |  |
| Ict1             | 926   | 1.83 | 1.04 | NM_026729.1 |  |
| 1110049G11Rik    | 2248  | 1.83 | 0.84 | NM_025410.1 |  |
| BC003965         | 4608  | 1.82 | 0.45 | XM_128528.2 |  |
| 1810058I14Rik    | 2503  | 1.82 | 0.32 | XM_484315   |  |
| Rps28            | 29890 | 1.82 | 0.37 | NM_016844.1 |  |
| Gm1673           | 3137  | 1.82 | 0.80 |             |  |
| B020018G12Rik    | 1339  | 1.82 | 0.71 |             |  |
| Rpl27            | 26738 | 1.82 | 0.49 | NM_011289   |  |
| Ndufs8           | 4430  | 1.82 | 0.97 | NM_144870.2 |  |
| B930090D16Rik    | 121   | 1.82 | 0.71 | NM_177602.2 |  |
| Mrps11           | 1172  | 1.82 | 0.47 | NM_026498.1 |  |
| LOC381633        | 2672  | 1.82 | 0.65 | XM_358631.1 |  |
| LOC245676        | 103   | 1.82 | 1.17 | XM_142259.2 |  |
| Rpl36al          | 26049 | 1.82 | 0.39 | NM_025589.1 |  |
| 2310057G13Rik    | 259   | 1.82 | 0.47 | XM_125542.2 |  |
| 2010110K16Rik    | 4647  | 1.82 | 0.46 | NM_026442   |  |
| Dad1             | 3201  | 1.82 | 0.51 | NM_010015.1 |  |
| Ubl5             | 7986  | 1.82 | 0.65 | NM_025401.1 |  |
| Ssr2             | 8984  | 1.82 | 0.45 | NM_025448.2 |  |
| 2010001F03Rik    | 393   | 1.82 | 0.43 | AK008004    |  |
| A930016P21Rik    | 242   | 1.82 | 0.56 | NM_026546.1 |  |
| Phpt1            | 445   | 1.81 | 0.68 | XM_203853.2 |  |
| Zbtb8os          | 1805  | 1.81 | 0.48 |             |  |
| Prkrip1          | 581   | 1.81 | 0.48 | NM_025774.1 |  |
| 2300009A05Rik    | 2626  | 1.81 | 0.55 | XM_204313.2 |  |
| Snrpd3           | 6536  | 1.81 | 0.80 | NM_026095.3 |  |
| Rmrp1            | 76    | 1.81 | 0.36 | AK004044    |  |
| 2510048O06Rik    | 16010 | 1.81 | 0.64 | NM_025624.1 |  |
| 2700061N24Rik    | 528   | 1.81 | 0.81 | NM_028281   |  |
| Atp5h            | 13114 | 1.81 | 0.65 | NM_027862   |  |
| Rom1             | 498   | 1.81 | 0.14 | NM_009073   |  |
| Drpla            | 718   | 1.81 | 0.96 | NM_007881.3 |  |
| 2410011G03Rik    | 6405  | 1.81 | 0.56 | NM_025551.1 |  |
| Lsm4             | 6969  | 1.81 | 0.51 | NM_015816.1 |  |
| Mrpl53           | 7472  | 1.81 | 0.89 | NM_026744.1 |  |
| Rabac1           | 4312  | 1.81 | 0.87 | NM_010261.1 |  |
| Egfl7            | 664   | 1.81 | 0.74 | NM_178444.3 |  |
| Atp5g2           | 895   | 1.81 | 0.90 | NM_026468.1 |  |
| 2810026P18Rik    | 1286  | 1.81 | 0.47 |             |  |
| Mrps12           | 2983  | 1.81 | 0.69 | NM_011885.2 |  |
| Churc1           | 975   | 1.81 | 0.50 | XM_126982   |  |
| Sod2             | 4354  | 1.81 | 0.66 | NM_013671.2 |  |
| Wbscr21          | 1612  | 1.80 | 0.51 | NM_145215.1 |  |
| Psmb3            | 4650  | 1.80 | 0.79 | NM_011971   |  |
| Lsm7             | 4459  | 1.80 | 0.35 | NM_025349.1 |  |
| LOC223797        | 9308  | 1.80 | 0.64 | XM_128310.1 |  |
| Rps11            | 52456 | 1.80 | 0.61 | XM_133477.1 |  |
| LOC381628        | 285   | 1.80 | 0.33 | XM_355587.1 |  |
| 2900073G15Rik    | 148   | 1.80 | 0.88 | NM_026064.1 |  |
| 2010015P12Rik    | 151   | 1.80 | 0.42 |             |  |
| 1110002E23Rik    | 821   | 1.80 | 1.30 | NM_025365.2 |  |
| Tpm2             | 731   | 1.80 | 0.74 | NM_009416.2 |  |
| Pdrg1            | 1711  | 1.80 | 0.68 | NM_178939.1 |  |
| C77604           | 2912  | 1.80 | 0.53 | XM_487903   |  |
| Cda              | 93    | 1.80 | 0.38 | XM_131801.1 |  |
| Psmb6            | 3782  | 1.80 | 0.71 | NM_008946   |  |
| LOC381676        | 143   | 1.80 | 0.68 | XM_358640.1 |  |
| 1110012M11Rik    | 5883  | 1.80 | 0.29 | NM_028617.2 |  |
| 2810411C16Rik    | 112   | 1.80 | 0.62 | AK013079    |  |
| 2310039H08Rik    | 3067  | 1.80 | 0.60 | NM_025966.2 |  |
| Snx8             | 1789  | 1.80 | 0.43 | NM_172277.1 |  |
| Drap1            | 4159  | 1.80 | 0.64 | NM_024176.1 |  |



|                |       |      |      |              |  |
|----------------|-------|------|------|--------------|--|
| 1810062G17Rik  | 158   | 1.80 | 0.96 | XM_130824.1  |  |
| Tbca           | 23449 | 1.80 | 0.66 | NM_009321.1  |  |
| Ccdc58         | 7033  | 1.80 | 0.46 |              |  |
| Grc10          | 4917  | 1.80 | 0.83 | NM_013535.1  |  |
| 2510038A11Rik  | 647   | 1.80 | 0.77 | NM_175109.2  |  |
| Pthr1          | 365   | 1.80 | 0.56 |              |  |
| 1700127F16Rik  | 117   | 1.80 | 0.54 | XM_355365.1  |  |
| Snrf           | 5229  | 1.80 | 0.58 |              |  |
| Rpl35a         | 26776 | 1.79 | 0.41 | NM_021338.2  |  |
| Hist1h3b       | 69    | 1.79 | 0.91 | NM_178203    |  |
| Ndufc1         | 4042  | 1.79 | 0.60 | NM_025523.1  |  |
| 2810410M20Rik  | 4451  | 1.79 | 0.57 | NM_024428.2  |  |
| Ndufv2         | 7256  | 1.79 | 0.61 | XM_128725.3  |  |
| Thyn1          | 2734  | 1.79 | 0.41 |              |  |
| Ndufa11        | 3223  | 1.79 | 0.55 | XM_128696.1  |  |
| Cox6a1         | 15478 | 1.79 | 0.66 | NM_007748.2  |  |
| Tceal6         | 420   | 1.79 | 0.90 |              |  |
| 0610005H09Rik  | 227   | 1.79 | 0.77 | AK002224     |  |
| Mcee           | 1412  | 1.79 | 0.19 | XM_133510.4  |  |
| Ube2s          | 62    | 1.79 | 0.77 | NM_133777.1  |  |
| E030030K01Rik  | 47    | 1.79 | 1.44 | AK087162     |  |
| Ssb4           | 579   | 1.79 | 0.12 | NM_145134.2  |  |
| 2010007H12Rik  | 2072  | 1.79 | 0.84 | NM_027242.1  |  |
| 1500011L16Rik  | 9092  | 1.79 | 0.84 | NM_026899.1  |  |
| 2700038C09Rik  | 2113  | 1.79 | 0.78 | NM_025598.1  |  |
| LOC382004      | 27803 | 1.79 | 0.33 | XM_356066.1  |  |
| E430002D04Rik  | 202   | 1.79 | 0.59 | NM_175533.2  |  |
| 2410017P09Rik  | 259   | 1.79 | 0.79 | XM_484108    |  |
| 2310016F22Rik  | 163   | 1.79 | 0.55 | NM_173743.2  |  |
| Polr2j         | 4534  | 1.79 | 0.51 | NM_011293.1  |  |
| Fkbp2          | 805   | 1.79 | 0.62 | NM_008020.2  |  |
| Cox5b          | 15927 | 1.79 | 0.49 | NM_009942.1  |  |
| Inhbe          | 1300  | 1.78 | 0.24 | NM_008382.1  |  |
| scl0001546.1_9 | 92    | 1.78 | 0.33 |              |  |
| Magmas         | 1038  | 1.78 | 0.31 | NM_025571.1  |  |
| Kdelr3         | 495   | 1.78 | 0.41 | NM_134090    |  |
| Bola3          | 1789  | 1.78 | 0.45 |              |  |
| Myl6           | 8948  | 1.78 | 0.46 | NM_010860    |  |
| 1810043H04Rik  | 751   | 1.78 | 0.85 |              |  |
| Ndufa7         | 4901  | 1.78 | 0.43 | NM_023202.2  |  |
| B230107H12Rik  | 239   | 1.78 | 0.38 |              |  |
| Fxyd5          | 747   | 1.78 | 0.78 | NM_008761.2  |  |
| Sh3bgrl3       | 8142  | 1.78 | 0.86 | NM_080559.1  |  |
| 0710001C05Rik  | 126   | 1.78 | 0.19 | XM_203592.1  |  |
| Ndufb6         | 189   | 1.78 | 0.81 |              |  |
| LOC381403      | 86    | 1.78 | 0.51 | XM_355362.1  |  |
| 1110054B14Rik  | 53    | 1.78 | 0.52 | AK027976     |  |
| 5730466P16Rik  | 4499  | 1.78 | 0.52 | NM_173453.1  |  |
| 4633402N23Rik  | 456   | 1.78 | 0.73 | XM_125946    |  |
| 5730427C23Rik  | 39    | 1.77 | 1.09 | NM_153777.1  |  |
| BC002163       | 2667  | 1.77 | 0.64 |              |  |
| Rpp21          | 2472  | 1.77 | 0.41 | NM_026308.1  |  |
| Esrra          | 969   | 1.77 | 0.48 | NM_007953.1  |  |
| LOC231462      | 74    | 1.77 | 0.94 | XM_132198.2  |  |
| BC050196       | 2685  | 1.77 | 0.66 | NM_201374.1  |  |
| Rps23          | 2315  | 1.77 | 0.53 | NM_024175    |  |
| 1190002C06Rik  | 4284  | 1.77 | 0.38 | NM_028447.1  |  |
| 2810004N20Rik  | 1422  | 1.77 | 1.05 | NM_025576.1  |  |
| Tceb2          | 10051 | 1.77 | 0.46 | NM_026305.1  |  |
| Timm10         | 3352  | 1.77 | 0.53 | NM_013896    |  |
| Ai413582       | 388   | 1.77 | 0.96 | NM_001002895 |  |
| 0610010E21Rik  | 1204  | 1.77 | 0.60 |              |  |
| Nola1          | 7219  | 1.77 | 0.41 | NM_026578.1  |  |
| St8sia5        | 368   | 1.77 | 0.16 |              |  |
| 1810046J19Rik  | 14500 | 1.77 | 0.75 | NM_025559.1  |  |
| BC022593       | 646   | 1.77 | 0.55 |              |  |
| Gpx3           | 1205  | 1.77 | 1.11 | NM_008161.1  |  |
| LOC383162      | 85    | 1.77 | 1.25 | XM_356903.1  |  |

|                 |       |      |      |             |  |
|-----------------|-------|------|------|-------------|--|
| Gpx2            | 5864  | 1.77 | 0.45 | NM_030677.1 |  |
| Ier5l           | 88    | 1.77 | 0.50 | NM_030244   |  |
| 1110004B13Rik   | 641   | 1.77 | 0.75 | NM_028336.1 |  |
| LOC208768       | 539   | 1.77 | 0.49 | XM_149000.1 |  |
| Ndufb9          | 782   | 1.77 | 0.55 | NM_023172.2 |  |
| Hrmt1l2-rs      | 108   | 1.77 | 0.35 |             |  |
| Tap2            | 385   | 1.77 | 0.45 | NM_011530.2 |  |
| BC029214        | 187   | 1.77 | 0.56 | NM_153557.1 |  |
| scl0002618.1_75 | 113   | 1.76 | 0.34 |             |  |
| S100a1          | 2444  | 1.76 | 0.50 | NM_011309.2 |  |
| Cdsn            | 106   | 1.76 | 0.97 |             |  |
| 0610039D01Rik   | 2169  | 1.76 | 0.46 | NM_026307.2 |  |
| LOC194913       | 12214 | 1.76 | 0.48 | XM_110926.2 |  |
| 1190002H23Rik   | 104   | 1.76 | 0.84 | NM_025427.1 |  |
| Ndufb3          | 4433  | 1.76 | 0.39 | NM_025597.1 |  |
| Hist1h2bf       | 339   | 1.76 | 0.45 | NM_178195.1 |  |
| Krtcap2         | 20907 | 1.76 | 0.41 | NM_025327.1 |  |
| Smn1            | 5026  | 1.76 | 0.25 | NM_011420.1 |  |
| 1810037l17Rik   | 17022 | 1.76 | 0.62 | NM_024461.1 |  |
| Serf1           | 844   | 1.76 | 0.62 | NM_011353.1 |  |
| Grcc2f          | 2657  | 1.76 | 0.60 | NM_013536.1 |  |
| Vkorc1          | 3269  | 1.76 | 0.76 | NM_178600.2 |  |
| scl0001118.1_0  | 1826  | 1.76 | 0.21 |             |  |
| Atpif1          | 35168 | 1.76 | 0.26 | NM_007512.2 |  |
| Chc1            | 435   | 1.76 | 0.45 | NM_133878.1 |  |
| Dnalc1          | 220   | 1.76 | 0.76 |             |  |
| Mrpl18          | 782   | 1.76 | 0.73 | NM_026310.1 |  |
| 1810035L17Rik   | 3459  | 1.76 | 0.25 | XM_354684.1 |  |
| Dncl2a          | 2495  | 1.76 | 0.57 | NM_025947   |  |
| Polr2g          | 7301  | 1.76 | 0.26 | NM_026329.1 |  |
| Rpl36           | 4549  | 1.76 | 0.45 | NM_018730   |  |
| U2af14          | 162   | 1.76 | 0.45 |             |  |
| 2610029G23Rik   | 947   | 1.75 | 0.60 | NM_026312.2 |  |
| 9130211l03Rik   | 369   | 1.75 | 0.78 | NM_030060   |  |
| Timm13a         | 1038  | 1.75 | 0.30 | NM_013899.1 |  |
| LOC269355       | 3639  | 1.75 | 0.63 | XM_193272.2 |  |
| Aptid1          | 769   | 1.75 | 0.60 |             |  |
| Atp6v1f         | 11380 | 1.75 | 0.68 | NM_025381   |  |
| 1810008O21Rik   | 1179  | 1.75 | 0.75 | XM_485868   |  |
| 2410015M20Rik   | 1791  | 1.75 | 0.57 | NM_153152.2 |  |
| Clpp            | 2742  | 1.75 | 0.64 | NM_017393   |  |
| 2700094L05Rik   | 749   | 1.75 | 0.64 | NM_028312.1 |  |
| 1110038F14Rik   | 468   | 1.75 | 0.50 | NM_054099.2 |  |
| Pramel4         | 13581 | 1.75 | 0.17 | NM_178248.2 |  |
| Gus-s           | 55    | 1.75 | 0.57 | AK002832    |  |
| AI505034        | 194   | 1.75 | 1.26 | NM_207206.1 |  |
| 1810023B24Rik   | 1666  | 1.75 | 0.88 | XM_134222.1 |  |
| 2810025M15Rik   | 3174  | 1.75 | 0.46 | NM_027274.2 |  |
| Cnih4           | 2559  | 1.75 | 0.62 |             |  |
| Zfp691          | 281   | 1.75 | 0.31 |             |  |
| D530030D03Rik   | 1316  | 1.75 | 0.37 | BC065395    |  |
| LOC383826       | 453   | 1.74 | 0.79 | XM_357280.1 |  |
| Hspc171         | 3005  | 1.74 | 0.81 | NM_025486.1 |  |
| Rpl27a          | 12289 | 1.74 | 0.31 | NM_011975.2 |  |
| Mrps33          | 5195  | 1.74 | 0.29 | NM_010270.1 |  |
| Mpra            | 343   | 1.74 | 0.54 | NM_027995.1 |  |
| D430004H20Rik   | 82    | 1.74 | 1.14 | AK084869    |  |
| 2310004N24Rik   | 513   | 1.74 | 1.04 | XM_181318.4 |  |
| Sod3            | 209   | 1.74 | 1.13 | NM_011435.2 |  |
| 2810404O06Rik   | 181   | 1.74 | 0.09 | AK012987    |  |
| A130062D16Rik   | 252   | 1.74 | 1.20 | AK037910    |  |
| Tmbim1          | 281   | 1.74 | 0.73 |             |  |
| Rps14           | 35267 | 1.74 | 0.42 | NM_020600.2 |  |
| 1810042K04Rik   | 1535  | 1.74 | 0.47 | NM_025604.1 |  |
| 1110019J04Rik   | 3225  | 1.74 | 0.41 | XM_149430.3 |  |
| Hint2           | 2195  | 1.74 | 0.61 | XM_143732.2 |  |
| Hint1           | 16520 | 1.74 | 0.59 | NM_008248.1 |  |
| 1110001P04Rik   | 1365  | 1.74 | 0.53 |             |  |

|                  |       |      |      |             |  |
|------------------|-------|------|------|-------------|--|
| LOC384525        | 611   | 1.74 | 0.88 | XM_357690.1 |  |
| Gstcd            | 71    | 1.74 | 0.44 |             |  |
| Ndufb2           | 290   | 1.74 | 0.39 | NM_026612.1 |  |
| Dnajc15          | 1942  | 1.74 | 0.60 |             |  |
| LOC224088        | 217   | 1.74 | 0.28 | XM_148692.2 |  |
| Rps13            | 10398 | 1.73 | 0.52 | NM_026533   |  |
| Rhox4d           | 3167  | 1.73 | 0.41 |             |  |
| Myo18a           | 175   | 1.73 | 0.70 | NM_011586.1 |  |
| Ccs              | 2298  | 1.73 | 0.69 | NM_016892.2 |  |
| LOC654426        | 7026  | 1.73 | 0.35 |             |  |
| 0710008A13Rik    | 32    | 1.73 | 1.96 | AK003028    |  |
| LOC237361        | 2843  | 1.73 | 0.30 | XM_137118.3 |  |
| Timm9            | 361   | 1.73 | 0.60 | NM_013895.2 |  |
| scl0002315.1_12  | 1877  | 1.73 | 0.67 |             |  |
| scl0020042.1_302 | 8763  | 1.73 | 0.39 |             |  |
| Atp5j            | 10530 | 1.73 | 0.60 | NM_016755.2 |  |
| 2610002D18Rik    | 522   | 1.73 | 0.59 | XM_131720.2 |  |
| 2610204M08Rik    | 42    | 1.73 | 1.06 | NM_198411.1 |  |
| Atp5l            | 10941 | 1.73 | 0.47 | NM_013795   |  |
| LOC383411        | 91    | 1.73 | 0.75 | XM_357038.1 |  |
| Tceal3           | 598   | 1.73 | 0.47 |             |  |
| Erp29            | 9165  | 1.73 | 0.26 | NM_026129.2 |  |
| 2310045N01Rik    | 637   | 1.73 | 0.33 | XM_486121   |  |
| Pcbd2            | 1698  | 1.73 | 0.89 |             |  |
| Bcl7c            | 473   | 1.73 | 0.77 | AK049064    |  |
| Lrp1             | 71    | 1.73 | 1.04 | NM_008512.1 |  |
| Rpl37a           | 30634 | 1.73 | 0.19 | NM_009084.2 |  |
| 2810021G02Rik    | 527   | 1.73 | 0.20 |             |  |
| Trappc1          | 2885  | 1.72 | 0.66 |             |  |
| Rplp1            | 47332 | 1.72 | 0.57 | NM_018853.1 |  |
| Chchd4           | 1608  | 1.72 | 0.60 | NM_133928.1 |  |
| Pdcd2            | 2717  | 1.72 | 0.80 | NM_008799.1 |  |
| D130058D22Rik    | 157   | 1.72 | 0.37 | AK051575    |  |
| E130216C05Rik    | 58    | 1.72 | 1.42 | AK087459    |  |
| Park7            | 17314 | 1.72 | 0.63 | NM_020569.1 |  |
| A830081L15Rik    | 80    | 1.72 | 0.31 | AK044025    |  |
| Leng9            | 337   | 1.72 | 0.36 | NM_175529.2 |  |
| 2010320M18Rik    | 816   | 1.72 | 0.87 |             |  |
| Nudt14           | 241   | 1.72 | 0.47 | NM_025399.1 |  |
| Tmem160          | 2315  | 1.72 | 0.68 |             |  |
| Commd6           | 1900  | 1.72 | 0.48 |             |  |
| 1810049H13Rik    | 651   | 1.72 | 0.60 | NM_025560.1 |  |
| Psmc3ip          | 1657  | 1.72 | 0.66 | NM_008949.2 |  |
| LOC245350        | 819   | 1.72 | 0.04 | XM_141626.2 |  |
| 1110019N10Rik    | 702   | 1.72 | 0.71 | NM_026753.1 |  |
| Hspb8            | 4144  | 1.72 | 0.16 | NM_030704.1 |  |
| Alpk3            | 63    | 1.72 | 0.99 |             |  |
| Nhej1            | 101   | 1.71 | 0.42 |             |  |
| Atp5d            | 4185  | 1.71 | 0.51 | NM_025313.1 |  |
| 1110006O24Rik    | 331   | 1.71 | 0.45 | NM_021417.1 |  |
| Supt4h2          | 2007  | 1.71 | 0.59 | NM_011509   |  |
| Rps10            | 8532  | 1.71 | 0.65 | NM_025963   |  |
| Znrd1            | 1488  | 1.71 | 0.63 | NM_023162.3 |  |
| Taf10            | 3618  | 1.71 | 0.79 | NM_020024.3 |  |
| Rps21            | 37581 | 1.71 | 0.20 | NM_025587.1 |  |
| LOC380828        | 8324  | 1.71 | 0.32 | XM_354736.1 |  |
| 1810008A14Rik    | 232   | 1.71 | 0.20 | NM_025457.1 |  |
| LOC330190        | 105   | 1.71 | 0.34 | XM_287498.1 |  |
| E130309N05Rik    | 277   | 1.71 | 0.54 | AK053811    |  |
| Rpl8             | 19328 | 1.71 | 0.56 | NM_012053.1 |  |
| 2410022L05Rik    | 2292  | 1.71 | 0.71 | NM_025556.1 |  |
| Calml4           | 973   | 1.71 | 0.55 | NM_138304.1 |  |
| LOC193798        | 16060 | 1.71 | 0.60 | XM_109346.4 |  |
| Dusp19           | 596   | 1.71 | 0.35 | NM_024438.2 |  |
| Rpl31            | 18399 | 1.71 | 0.44 | NM_053257.1 |  |
| 4933414G08       | 60    | 1.71 | 0.83 | NM_177867.2 |  |
| Opn3             | 71    | 1.71 | 1.48 | NM_010098.1 |  |
| LOC218473        | 2203  | 1.71 | 0.50 | XM_122605.2 |  |

|                  |       |      |      |             |  |
|------------------|-------|------|------|-------------|--|
| Nedd8            | 7186  | 1.71 | 0.58 | NM_008683   |  |
| Pfdn4            | 2765  | 1.71 | 0.74 | XM_355370   |  |
| Med10            | 1084  | 1.71 | 0.51 |             |  |
| 2900074C18Rik    | 160   | 1.71 | 1.08 | XM_355870.1 |  |
| Aprt             | 11735 | 1.71 | 0.81 | NM_009698.1 |  |
| LOC385506        | 6053  | 1.71 | 0.62 | XM_358256.1 |  |
| Tubb2b           | 1702  | 1.70 | 0.38 |             |  |
| 2610009E16Rik    | 1116  | 1.70 | 1.05 | XM_355811   |  |
| Scgf             | 424   | 1.70 | 0.53 | NM_009131.1 |  |
| 1500041I23Rik    | 567   | 1.70 | 0.23 | XM_356257.1 |  |
| Sms              | 2490  | 1.70 | 0.28 | NM_009214   |  |
| 2610029K21Rik    | 374   | 1.70 | 0.55 | NM_025663.2 |  |
| Rabgap1l         | 43    | 1.70 | 1.31 | NM_013862.3 |  |
| Rpl13            | 21112 | 1.70 | 0.60 | NM_016738   |  |
| Pop5             | 7456  | 1.70 | 0.56 | NM_026398.2 |  |
| LOC381583        | 1464  | 1.70 | 0.49 | XM_355542.1 |  |
| 1810060D16Rik    | 7452  | 1.70 | 0.41 | XM_128110.3 |  |
| LOC383793        | 9991  | 1.70 | 0.64 | XM_357256.1 |  |
| BC030476         | 1510  | 1.70 | 0.54 | NM_173421.1 |  |
| 6430590I03Rik    | 1412  | 1.70 | 0.74 | XM_489535   |  |
| Ptpre            | 836   | 1.70 | 0.78 | NM_011212.2 |  |
| LOC383308        | 2389  | 1.70 | 0.22 | XM_356977.1 |  |
| Ase1             | 1362  | 1.70 | 0.87 | NM_145822.1 |  |
| LOC382911        | 98    | 1.70 | 0.94 | XM_356748.1 |  |
| LOC385403        | 129   | 1.70 | 0.54 | XM_358227.1 |  |
| Atp5o            | 15395 | 1.70 | 0.43 | NM_138597   |  |
| Hist1h2bj        | 272   | 1.70 | 0.35 | NM_178198.1 |  |
| 2310007D07Rik    | 125   | 1.70 | 0.39 | AK009198    |  |
| 2300002D11Rik    | 286   | 1.70 | 0.29 | XM_149530   |  |
| Chchd1           | 12622 | 1.70 | 0.49 | NM_025366.1 |  |
| LOC272681        | 35090 | 1.70 | 0.33 | XM_195399.2 |  |
| 1110065P19Rik    | 576   | 1.70 | 0.69 |             |  |
| 1810014L12Rik    | 2780  | 1.69 | 0.31 | NM_133706.1 |  |
| Vamp8            | 2257  | 1.69 | 0.37 | NM_016794.2 |  |
| Mfge8            | 2828  | 1.69 | 0.12 | NM_008594   |  |
| 1810063B05Rik    | 1552  | 1.69 | 0.86 | NM_174987.2 |  |
| C730033N22Rik    | 79    | 1.69 | 0.50 | AK050284    |  |
| 1700113I01Rik    | 44    | 1.69 | 1.25 | AK007197    |  |
| 2410003K15Rik    | 881   | 1.69 | 0.58 | XM_132537.3 |  |
| Tbx10            | 69    | 1.69 | 0.58 | XM_355121.1 |  |
| MGC68323         | 2511  | 1.69 | 0.44 | NM_199472.1 |  |
| Gm71             | 182   | 1.69 | 0.36 |             |  |
| Ift20            | 2721  | 1.69 | 0.66 |             |  |
| Wbscr16          | 378   | 1.69 | 0.23 | NM_033572.1 |  |
| 2600001B17Rik    | 349   | 1.69 | 0.77 | NM_172947   |  |
| 2810441H08Rik    | 140   | 1.69 | 0.38 | AK013285    |  |
| 2900041M22Rik    | 78    | 1.69 | 0.39 | XM_484098   |  |
| C1qbp            | 1206  | 1.69 | 0.73 | NM_007573.1 |  |
| LOC245651        | 286   | 1.69 | 0.62 | XM_142195.3 |  |
| LOC381866        | 98    | 1.69 | 0.48 | XM_358664.1 |  |
| Ard1             | 3113  | 1.69 | 0.60 | NM_019870.1 |  |
| Rps12            | 41096 | 1.69 | 0.51 | NM_011295.2 |  |
| 1700129I04Rik    | 152   | 1.69 | 0.22 |             |  |
| Ndufb10          | 1388  | 1.69 | 0.21 | XM_128594.4 |  |
| LOC333842        | 17470 | 1.69 | 0.45 | XM_289937.2 |  |
| Hmga1            | 724   | 1.69 | 1.06 | NM_016660.1 |  |
| Rpl10a           | 24949 | 1.68 | 0.71 | NM_011287.1 |  |
| LOC269251        | 2789  | 1.68 | 0.45 | XM_193262.3 |  |
| 1500003D12Rik    | 5340  | 1.68 | 0.52 | NM_025895   |  |
| LOC380851        | 45    | 1.68 | 0.99 | XM_358444.1 |  |
| scl0002791.1_134 | 1623  | 1.68 | 0.41 |             |  |
| 2700088M22Rik    | 1564  | 1.68 | 0.56 | NM_026025   |  |
| E330009F12Rik    | 82    | 1.68 | 0.76 | AK087703    |  |
| 1110002D22Rik    | 3048  | 1.68 | 0.38 | AK003285    |  |
| Cox7b            | 292   | 1.68 | 0.36 | NM_025379   |  |
| Psm5             | 6919  | 1.68 | 0.45 | NM_011967.1 |  |
| Pmf1             | 162   | 1.68 | 1.35 | NM_025928.1 |  |
| Pigf             | 3104  | 1.68 | 0.44 | NM_008838.1 |  |

|               |       |      |      |             |  |
|---------------|-------|------|------|-------------|--|
| A830007L07Rik | 1632  | 1.68 | 0.30 | XM_133865.4 |  |
| 2610019P18Rik | 124   | 1.68 | 0.58 | NM_178612.2 |  |
| C130052O15Rik | 196   | 1.68 | 0.86 | AK048362    |  |
| LOC381649     | 5825  | 1.68 | 0.51 | XM_355612.1 |  |
| Cdc34         | 1134  | 1.68 | 0.73 | NM_177613.2 |  |
| LOC383010     | 3803  | 1.68 | 0.67 | XM_356798.1 |  |
| Ndufb5        | 1306  | 1.68 | 0.58 | NM_025316.2 |  |
| Polr2h        | 1885  | 1.68 | 0.40 | NM_145632   |  |
| Sln           | 1038  | 1.68 | 0.30 | NM_025540.1 |  |
| Rabl4         | 1155  | 1.68 | 0.79 | NM_025931.2 |  |
| Rps27         | 32370 | 1.68 | 0.27 | NM_027015.1 |  |
| Myohd1        | 336   | 1.68 | 0.33 | NM_025414   |  |
| LOC240682     | 194   | 1.68 | 0.10 | XM_136407.3 |  |
| 0610011F06Rik | 649   | 1.68 | 0.61 | XM_128511   |  |
| Sdf2l1        | 4886  | 1.68 | 0.69 | XM_147210.1 |  |
| Atp6v1g1      | 378   | 1.68 | 0.87 | NM_024173.1 |  |
| C78541        | 1400  | 1.68 | 0.44 | NM_133800.2 |  |
| 2510005D08Rik | 835   | 1.67 | 0.53 | NM_026526.1 |  |
| LOC380707     | 1170  | 1.67 | 0.42 | XM_354622.1 |  |
| Mrpl43        | 2731  | 1.67 | 0.77 | NM_053164.2 |  |
| Zcrb1         | 6436  | 1.67 | 0.40 |             |  |
| LOC382885     | 17591 | 1.67 | 0.33 | XM_356731.1 |  |
| LOC236831     | 6287  | 1.67 | 0.29 | XM_141785.2 |  |
| Olfr1471      | 44    | 1.67 | 0.92 | NM_207132.1 |  |
| A830026B15Rik | 55    | 1.67 | 0.72 | AK043729    |  |
| Niban         | 119   | 1.67 | 0.12 | NM_022018.1 |  |
| Crcp          | 2896  | 1.67 | 0.33 | NM_007761.1 |  |
| Mrps26        | 3407  | 1.67 | 0.52 | NM_207207.1 |  |
| Prpf19        | 3017  | 1.67 | 0.21 |             |  |
| C430026P20Rik | 143   | 1.67 | 1.08 | AK049549    |  |
| D2Bwg1335e    | 493   | 1.67 | 0.28 | XM_484981   |  |
| Rab26         | 360   | 1.67 | 0.16 | XM_283428   |  |
| Mrpl54        | 2269  | 1.67 | 0.54 | NM_025317.1 |  |
| Qscn6         | 564   | 1.67 | 0.13 | NM_023268   |  |
| Tmem14c       | 3177  | 1.67 | 0.57 | NM_025387.1 |  |
| 5730405M13Rik | 190   | 1.67 | 0.63 | NM_025671.1 |  |
| Sdhc          | 1827  | 1.67 | 0.56 | NM_025321.1 |  |
| 1110007C05Rik | 4855  | 1.67 | 1.02 | NM_025368.1 |  |
| Bcl2l14       | 103   | 1.67 | 0.64 | NM_025778   |  |
| Tesc          | 87    | 1.67 | 0.99 | NM_021344.2 |  |
| Tmem60        | 2804  | 1.67 | 0.86 |             |  |
| Nola2         | 3955  | 1.67 | 0.61 | NM_026631.1 |  |
| Ifitm2        | 5958  | 1.67 | 0.71 | NM_030694.1 |  |
| Tmem4         | 1677  | 1.67 | 0.37 | NM_019953.1 |  |
| 7420404O03Rik | 594   | 1.67 | 0.54 | AK078662    |  |
| 1700012B18Rik | 329   | 1.67 | 0.39 | NM_027950.1 |  |
| LOC383712     | 14635 | 1.67 | 0.51 | XM_357202.1 |  |
| Mrpl20        | 3449  | 1.67 | 0.33 | AK015199    |  |
| Glox1         | 226   | 1.66 | 0.16 |             |  |
| Mrpl30        | 6931  | 1.66 | 0.81 | NM_027098.1 |  |
| Bex4          | 7216  | 1.66 | 0.73 |             |  |
| 2510006D16Rik | 4979  | 1.66 | 0.52 | NM_029748.1 |  |
| Dnajc4        | 338   | 1.66 | 0.57 | NM_020566.1 |  |
| Pgls          | 703   | 1.66 | 0.31 | AK036059    |  |
| Nudt2         | 596   | 1.66 | 0.48 | NM_025539.1 |  |
| 2610018I05Rik | 145   | 1.66 | 0.20 | NM_183279.1 |  |
| Psme2b        | 272   | 1.66 | 0.66 | NM_011191.1 |  |
| H1fx          | 907   | 1.66 | 1.40 | NM_198622.1 |  |
| Spint2        | 230   | 1.66 | 0.38 | NM_011464.1 |  |
| BC003324      | 270   | 1.66 | 0.49 | NM_030259   |  |
| Dnajb10       | 1514  | 1.66 | 0.10 | NM_178055.2 |  |
| 0610007H07Rik | 10776 | 1.66 | 0.45 | NM_026617.1 |  |
| LOC329076     | 9674  | 1.66 | 0.65 | XM_282724.2 |  |
| LOC382843     | 3484  | 1.66 | 0.56 | XM_356704.1 |  |
| Bnip1         | 865   | 1.66 | 0.30 | NM_172149   |  |
| A330079A07Rik | 52    | 1.66 | 0.91 | AK039657    |  |
| 1500031N17Rik | 1150  | 1.66 | 0.25 | AK005329    |  |
| Unc84b        | 797   | 1.66 | 0.45 |             |  |

|                  |       |      |      |             |  |
|------------------|-------|------|------|-------------|--|
| Eppb9            | 3742  | 1.66 | 0.56 | NM_013717.1 |  |
| Sgrp23           | 239   | 1.66 | 0.60 |             |  |
| Mrpl2            | 2660  | 1.66 | 0.23 | NM_025302.2 |  |
| Pdlim1           | 1471  | 1.65 | 0.30 | NM_016861.1 |  |
| Ung              | 736   | 1.65 | 0.60 | BC011039    |  |
| scl0002975.1_346 | 127   | 1.65 | 1.52 |             |  |
| Hist1h4a         | 85    | 1.65 | 0.68 | NM_178192   |  |
| C1qtnf4          | 1162  | 1.65 | 0.62 | NM_026161.1 |  |
| Rab17            | 52    | 1.65 | 0.07 | NM_008998.2 |  |
| Scand1           | 2302  | 1.65 | 0.70 | NM_020255.1 |  |
| Gnmt             | 492   | 1.65 | 0.44 | NM_010321.1 |  |
| Psmb2            | 10057 | 1.65 | 0.43 | NM_011970.2 |  |
| Cope             | 3373  | 1.65 | 0.34 | NM_021538.1 |  |
| Magoh            | 1561  | 1.65 | 0.63 | NM_010760.1 |  |
| Arpc3            | 3481  | 1.65 | 1.18 | NM_019824.2 |  |
| A430005L14Rik    | 2115  | 1.65 | 0.55 | NM_175287.2 |  |
| Cd63             | 4904  | 1.65 | 0.53 | NM_007653.1 |  |
| Dci              | 683   | 1.65 | 0.73 | NM_010023.2 |  |
| Guk1             | 6536  | 1.65 | 0.37 | NM_008193   |  |
| Cox5a            | 7538  | 1.65 | 0.70 | NM_007747   |  |
| Dph4             | 289   | 1.65 | 0.72 |             |  |
| 2700046G09Rik    | 227   | 1.65 | 0.77 | XM_484798   |  |
| Oaz1             | 8006  | 1.65 | 0.47 | NM_008753   |  |
| Cpne2            | 53    | 1.65 | 0.81 | NM_153507.2 |  |
| Lsm2             | 871   | 1.65 | 0.73 | NM_030597.2 |  |
| Rps2             | 41881 | 1.65 | 0.55 | NM_008503.2 |  |
| 4932416C15Rik    | 71    | 1.65 | 0.49 | AK030022    |  |
| Cenpb            | 8454  | 1.65 | 0.41 | NM_007682.2 |  |
| Arl6ip4          | 2045  | 1.65 | 0.49 | NM_144509.1 |  |
| Ssbp1            | 307   | 1.65 | 0.38 | NM_028358   |  |
| 2410012H22Rik    | 441   | 1.65 | 0.49 | XM_126343.1 |  |
| Rpl15            | 32328 | 1.65 | 0.60 | NM_025586.1 |  |
| Them2            | 1652  | 1.64 | 0.58 | NM_025790.1 |  |
| Atp5g3           | 55195 | 1.64 | 0.49 | NM_175015.1 |  |
| Blvrb            | 2032  | 1.64 | 0.87 | NM_144923   |  |
| Arl3             | 984   | 1.64 | 0.34 | NM_019718.2 |  |
| 9130206I24Rik    | 360   | 1.64 | 0.68 | XM_489057   |  |
| Bloc1s1          | 491   | 1.64 | 0.29 | NM_015740.2 |  |
| Pfdn5            | 5879  | 1.64 | 0.52 | NM_020031.1 |  |
| Chchd7           | 1927  | 1.64 | 0.65 | NM_181391.1 |  |
| Rnu3ip2          | 1568  | 1.64 | 0.51 | NM_145620.3 |  |
| 1810006O10Rik    | 204   | 1.64 | 0.54 | AK007355    |  |
| 2810428C21Rik    | 749   | 1.64 | 0.43 | NM_153503.1 |  |
| 2610029J22Rik    | 205   | 1.64 | 0.53 | AK011615    |  |
| 0610007P22Rik    | 1069  | 1.64 | 0.56 | NM_026676.1 |  |
| Gm1631           | 64    | 1.64 | 0.42 | NM_201366   |  |
| 1190002L16Rik    | 3740  | 1.64 | 0.71 | NM_133976.1 |  |
| Arf6             | 2974  | 1.64 | 0.85 | NM_007481.1 |  |
| LOC215678        | 2022  | 1.64 | 0.46 | XM_125110.4 |  |
| Ptpru            | 230   | 1.64 | 0.50 | NM_011214   |  |
| Rps16            | 19537 | 1.64 | 0.39 | NM_013647.1 |  |
| BC003266         | 840   | 1.64 | 0.58 | NM_030252.1 |  |
| Bcap37           | 6138  | 1.64 | 0.68 | NM_007531.1 |  |
| 2810405K02Rik    | 636   | 1.64 | 0.57 | NM_025582.2 |  |
| Fahd1            | 954   | 1.64 | 0.50 | NM_023480.1 |  |
| Aarsd1           | 784   | 1.64 | 0.74 |             |  |
| 2810025O06Rik    | 6941  | 1.64 | 0.42 | AK012814    |  |
| Rpia             | 573   | 1.63 | 0.75 | NM_009075.1 |  |
| B230322F03Rik    | 477   | 1.63 | 0.51 | AK045908    |  |
| Penk1            | 68    | 1.63 | 0.25 | XM_131313.2 |  |
| Erh              | 8329  | 1.63 | 0.52 | NM_007951.1 |  |
| Cyc1             | 4691  | 1.63 | 0.68 | NM_025567.1 |  |
| LOC223672        | 658   | 1.63 | 0.20 | XM_128064.4 |  |
| Slc25a26         | 482   | 1.63 | 0.31 | NM_026255.2 |  |
| Scnm1            | 483   | 1.63 | 0.40 | XM_485277   |  |
| Tyms-ps          | 1967  | 1.63 | 0.42 |             |  |
| Pop7             | 982   | 1.63 | 0.59 | NM_028753.1 |  |
| Ranbp1           | 10557 | 1.63 | 0.63 | NM_011239.1 |  |

|               |       |      |      |             |  |
|---------------|-------|------|------|-------------|--|
| Pla2g2f       | 52    | 1.63 | 1.38 | NM_012045.2 |  |
| Fgfbp3        | 102   | 1.63 | 0.33 |             |  |
| Timm17a       | 6129  | 1.63 | 0.44 | NM_011590.1 |  |
| 2410008K03Rik | 146   | 1.63 | 0.41 | XM_125970.2 |  |
| 4930539I12Rik | 12313 | 1.63 | 0.35 | NM_029203   |  |
| D630044F24Rik | 402   | 1.63 | 0.65 | NM_201372.1 |  |
| LOC385467     | 3456  | 1.63 | 0.68 | XM_358245.1 |  |
| 2810430M08Rik | 2834  | 1.63 | 0.57 | NM_026041.1 |  |
| Cdh15         | 281   | 1.63 | 0.24 | NM_007662.1 |  |
| 6530401N04Rik | 74    | 1.63 | 0.35 | NM_029545   |  |
| Nt5c          | 3812  | 1.63 | 0.44 | NM_015807.1 |  |
| 5430405H02Rik | 329   | 1.63 | 0.70 |             |  |
| Nfyb          | 1946  | 1.63 | 0.44 | NM_010914.1 |  |
| Ccdc56        | 3557  | 1.63 | 0.36 |             |  |
| Rps24         | 5196  | 1.63 | 0.36 | NM_011297.2 |  |
| 2700029M09Rik | 3916  | 1.63 | 0.66 | XM_134183.4 |  |
| 2610028L19Rik | 1828  | 1.63 | 0.38 | NM_027002.1 |  |
| LOC225058     | 1921  | 1.63 | 0.24 | XM_140116.1 |  |
| 1110030J09Rik | 350   | 1.63 | 0.83 | NM_025397.2 |  |
| Eif3s4        | 10554 | 1.63 | 0.60 | NM_016876.2 |  |
| 1110032O16Rik | 121   | 1.63 | 0.49 | XM_133813.4 |  |
| Hspe1         | 3976  | 1.63 | 0.45 | NM_008303.2 |  |
| Icam4         | 75    | 1.62 | 0.34 | NM_023892.1 |  |
| Map1lc3a      | 191   | 1.62 | 1.07 | NM_025735.1 |  |
| Uqcrb         | 1214  | 1.62 | 0.23 | NM_026219.1 |  |
| Rps7          | 20195 | 1.62 | 0.45 | NM_011300   |  |
| 9430023L20Rik | 1172  | 1.62 | 0.36 | NM_026566.1 |  |
| Jtb           | 4455  | 1.62 | 0.66 | NM_206924.1 |  |
| A930027G11Rik | 379   | 1.62 | 0.81 |             |  |
| 1810026C22Rik | 262   | 1.62 | 0.79 | AK007605    |  |
| 4833427B12Rik | 679   | 1.62 | 0.56 | XM_195728   |  |
| Mrpl22        | 1961  | 1.62 | 0.56 | NM_175001.1 |  |
| Tcte3         | 295   | 1.62 | 0.80 | NM_011560   |  |
| 2410005K17Rik | 714   | 1.62 | 0.58 | NM_024462.1 |  |
| Insl6         | 136   | 1.62 | 0.71 | NM_013754.1 |  |
| LOC380631     | 10869 | 1.62 | 0.50 | XM_354536.1 |  |
| Ppp1r11       | 3511  | 1.62 | 0.69 | NM_029632.1 |  |
| Alad          | 15006 | 1.62 | 0.41 | NM_008525.3 |  |
| Psmb7         | 6491  | 1.62 | 0.44 | NM_011187.1 |  |
| 6530401D06Rik | 279   | 1.62 | 0.40 | AK018306    |  |
| LOC380682     | 14349 | 1.62 | 0.57 | XM_354595.1 |  |
| Nans          | 1466  | 1.62 | 0.33 | NM_053179.2 |  |
| Rpa3          | 4202  | 1.62 | 0.47 | NM_026632.1 |  |
| Ckb           | 443   | 1.62 | 0.24 | NM_021273   |  |
| D630004G21Rik | 108   | 1.62 | 0.19 | AK085278    |  |
| Tmem141       | 283   | 1.62 | 0.45 |             |  |
| Rpl32         | 32398 | 1.62 | 0.33 | NM_172086   |  |
| 1810009K13Rik | 501   | 1.62 | 0.74 | NM_025462.1 |  |
| Tmie          | 2193  | 1.62 | 0.23 | NM_146260.1 |  |
| 2900070E19Rik | 4331  | 1.62 | 0.86 | NM_028419.1 |  |
| 5330431N19Rik | 877   | 1.62 | 0.61 | NM_172639.1 |  |
| Stmn3         | 2221  | 1.62 | 0.44 | NM_009133.2 |  |
| LOC385505     | 4433  | 1.62 | 0.25 | XM_358255.1 |  |
| Parp3         | 98    | 1.62 | 0.31 |             |  |
| Gkap1         | 1080  | 1.62 | 0.43 | NM_019832.2 |  |
| Avpi1         | 447   | 1.62 | 0.53 | NM_027106.1 |  |
| Mrps18b       | 1703  | 1.62 | 0.63 | NM_025878.1 |  |
| LOC384836     | 105   | 1.62 | 0.49 | XM_357889.1 |  |
| Rpl7          | 30134 | 1.62 | 0.33 | NM_011291   |  |
| 9330132O05Rik | 118   | 1.62 | 0.35 | AK020369    |  |
| Ptpla         | 1887  | 1.62 | 0.53 | NM_013935.1 |  |
| D030068L24Rik | 434   | 1.62 | 0.22 | XM_111244   |  |
| Nudt8         | 614   | 1.62 | 0.58 | NM_025529.2 |  |
| LOC384710     | 1847  | 1.62 | 0.62 | XM_357808.1 |  |
| Manbal        | 2070  | 1.62 | 0.53 | XM_130628.2 |  |
| Mvp           | 409   | 1.61 | 0.23 | NM_080638.1 |  |
| Hoxc10        | 245   | 1.61 | 0.61 | NM_010462.2 |  |
| Thoc6         | 482   | 1.61 | 0.43 |             |  |

|               |       |      |      |             |  |
|---------------|-------|------|------|-------------|--|
| Mrps17        | 11559 | 1.61 | 0.61 | NM_025450.1 |  |
| LOC381808     | 34934 | 1.61 | 0.56 | XM_355809.1 |  |
| LOC384727     | 1400  | 1.61 | 0.59 | XM_357823.1 |  |
| Snora65       | 421   | 1.61 | 0.45 |             |  |
| Atp6v0b       | 6868  | 1.61 | 0.74 | NM_033617.1 |  |
| Pstpip1       | 60    | 1.61 | 1.06 | NM_011193.1 |  |
| Has1          | 124   | 1.61 | 0.46 | AK053726    |  |
| Aes           | 2396  | 1.61 | 1.31 | NM_010347   |  |
| Psemb1        | 5563  | 1.61 | 0.49 | NM_011185   |  |
| 2310031A18Rik | 203   | 1.61 | 0.33 | XM_134539.1 |  |
| 5730436H21Rik | 1448  | 1.61 | 0.30 | NM_134139.1 |  |
| BC063749      | 425   | 1.61 | 0.13 |             |  |
| Pin4          | 404   | 1.61 | 0.50 | XM_135990   |  |
| LOC383576     | 1173  | 1.61 | 0.69 | XM_357131.1 |  |
| B3gnt6        | 759   | 1.61 | 0.08 | NM_175383.1 |  |
| Rras          | 429   | 1.61 | 0.57 | NM_009101.1 |  |
| 2610524H06Rik | 1271  | 1.61 | 0.43 | NM_181075.2 |  |
| LOC268569     | 16502 | 1.61 | 0.55 | XM_195821.2 |  |
| Tfpt          | 352   | 1.61 | 0.90 | NM_023524.1 |  |
| Sepx1         | 961   | 1.61 | 0.49 | NM_013759.1 |  |
| Chchd8        | 424   | 1.61 | 0.36 |             |  |
| G630039H03Rik | 53    | 1.61 | 0.64 | NM_172824.1 |  |
| LOC218060     | 61    | 1.61 | 0.70 | XM_138460.2 |  |
| Abhd14a       | 189   | 1.60 | 0.60 |             |  |
| Za20d2        | 94    | 1.60 | 0.15 | NM_009551.2 |  |
| Mea1          | 824   | 1.60 | 0.50 | NM_010787.1 |  |
| LOC380747     | 36966 | 1.60 | 0.39 | XM_354660.1 |  |
| 2810032E02Rik | 325   | 1.60 | 0.06 | XM_484396   |  |
| Axud1         | 768   | 1.60 | 0.09 | NM_153287.2 |  |
| BC003479      | 1552  | 1.60 | 0.42 | NM_145428.1 |  |
| 9130230N09Rik | 269   | 1.60 | 0.09 |             |  |
| Rps29         | 64084 | 1.60 | 0.16 | NM_009093.1 |  |
| LOC381709     | 185   | 1.60 | 0.20 | XM_358646.1 |  |
| Krtcap3       | 6787  | 1.60 | 0.50 | NM_027221.1 |  |
| A430106H13Rik | 186   | 1.60 | 0.24 | AK020775    |  |
| 4732474O15Rik | 411   | 1.60 | 0.26 | XM_138397.3 |  |
| LOC272465     | 194   | 1.60 | 0.62 | XM_198094.2 |  |
| Fetub         | 130   | 1.60 | 0.60 | NM_021564.1 |  |
| LOC268695     | 15417 | 1.60 | 0.49 | XM_193183.2 |  |
| D6Wsu176e     | 2012  | 1.60 | 0.09 | NM_138587.3 |  |
| Pbp           | 717   | 1.60 | 0.82 | NM_018858.1 |  |
| Nxph4         | 301   | 1.60 | 1.29 | NM_183297.1 |  |
| Dpm2          | 1123  | 1.60 | 0.18 | NM_010073.2 |  |
| LOC236932     | 4712  | 1.60 | 0.33 | XM_125431.2 |  |
| 2310009B15Rik | 1081  | 1.60 | 0.88 | XM_489101   |  |
| 1810013D10Rik | 1590  | 1.60 | 0.55 | XM_485608   |  |
| 2810012D02Rik | 265   | 1.60 | 0.63 |             |  |
| H2-BI         | 584   | 1.60 | 0.24 | NM_008199.1 |  |
| 1700009P17Rik | 484   | 1.60 | 0.40 | NM_029301.1 |  |
| 9628654_5     | 228   | 1.60 | 0.49 |             |  |
| 2610015J01Rik | 636   | 1.60 | 0.48 | AK011403    |  |
| 3010033P07Rik | 15661 | 1.60 | 0.50 | XM_133123.4 |  |
| Mcam          | 147   | 1.60 | 0.09 | NM_023061.1 |  |
| Shfdg1        | 13447 | 1.60 | 0.24 | NM_009169.1 |  |
| 2900009C16Rik | 1629  | 1.60 | 0.15 |             |  |
| 6230415M23Rik | 394   | 1.60 | 0.67 |             |  |
| Nos3as        | 4252  | 1.60 | 0.20 |             |  |
| Rhox4g        | 181   | 1.59 | 0.47 |             |  |
| Rpl9          | 34960 | 1.59 | 0.32 | NM_011292.1 |  |
| Sdsl          | 194   | 1.59 | 0.77 | NM_133902.2 |  |
| Spire2        | 562   | 1.59 | 0.75 | NM_172287.2 |  |
| 3110009E18Rik | 598   | 1.59 | 0.67 | NM_028439.1 |  |
| Rps3          | 12443 | 1.59 | 0.45 | NM_012052.1 |  |
| 1600025D17Rik | 244   | 1.59 | 0.45 | NM_028065.2 |  |
| Rab27a        | 3136  | 1.59 | 0.31 | NM_023635.2 |  |
| Slc24a6       | 422   | 1.59 | 0.13 | NM_133221.1 |  |
| Bri3          | 2839  | 1.59 | 0.45 | AK049027    |  |
| Atpi          | 138   | 1.59 | 1.33 | AK011886    |  |



|               |       |      |      |             |  |
|---------------|-------|------|------|-------------|--|
| 3110050K21Rik | 60    | 1.59 | 0.79 | XM_127780.4 |  |
| Mrpl38        | 4614  | 1.59 | 0.10 | NM_024177.2 |  |
| Pdzd11        | 1240  | 1.59 | 0.37 |             |  |
| 2700029E10Rik | 430   | 1.59 | 0.41 | NM_180588.1 |  |
| LOC245828     | 1771  | 1.59 | 0.77 | XM_126252.3 |  |
| Txn1          | 336   | 1.59 | 0.33 | NM_011660.2 |  |
| Lsm12         | 376   | 1.59 | 0.87 |             |  |
| 2410018G20Rik | 1829  | 1.59 | 0.72 | XM_148413.1 |  |
| Slc27a3       | 508   | 1.59 | 0.40 | XM_130954.3 |  |
| Mrpl28        | 6192  | 1.59 | 0.52 | NM_024227.2 |  |
| Acy1          | 331   | 1.59 | 0.39 | NM_025371.1 |  |
| Gemin7        | 648   | 1.59 | 0.53 | NM_027189.1 |  |
| Psm4          | 11562 | 1.59 | 0.43 | NM_008951.1 |  |
| C430014K11Rik | 893   | 1.59 | 0.72 |             |  |
| 1110021H02Rik | 3203  | 1.59 | 0.63 | NM_025388.1 |  |
| Gpr43         | 3113  | 1.59 | 0.52 | NM_146187.2 |  |
| Hist1h4j      | 92    | 1.59 | 0.61 | NM_178210.1 |  |
| Relb          | 145   | 1.59 | 0.53 | NM_009046.2 |  |
| 1110008B24Rik | 3935  | 1.59 | 0.31 | XM_177016.2 |  |
| Itgb4bp       | 6709  | 1.59 | 0.58 | AK018313    |  |
| Ppap2c        | 1667  | 1.59 | 0.40 | NM_015817.1 |  |
| Mtx1          | 3403  | 1.59 | 0.44 | NM_013604.1 |  |
| AI850995      | 608   | 1.59 | 0.10 | XM_488675   |  |
| 2700024H10Rik | 302   | 1.59 | 0.55 |             |  |
| Rpl13a        | 1426  | 1.59 | 0.49 | NM_009438.3 |  |
| Ppil3         | 1182  | 1.59 | 0.17 | NM_027374.1 |  |
| BC024814      | 891   | 1.59 | 0.57 | NM_146247   |  |
| Plk3          | 864   | 1.59 | 0.42 | NM_013807.1 |  |
| C030014I23Rik | 56    | 1.59 | 0.50 |             |  |
| Timm50        | 5378  | 1.58 | 0.25 | NM_025616.1 |  |
| Ndg2          | 44359 | 1.58 | 0.18 | NM_175329.3 |  |
| 2810417J12Rik | 2424  | 1.58 | 0.61 | NM_029798.1 |  |
| 0610030H11Rik | 109   | 1.58 | 0.64 | NM_026712.1 |  |
| Tmub1         | 427   | 1.58 | 0.86 |             |  |
| 4921511I23Rik | 423   | 1.58 | 0.48 | AK029517    |  |
| LOC381947     | 1643  | 1.58 | 0.55 | XM_355970.1 |  |
| Acn9          | 1033  | 1.58 | 0.35 | XM_355744.1 |  |
| AI838661      | 1748  | 1.58 | 0.84 | NM_133884.1 |  |
| 2610018L09Rik | 1426  | 1.58 | 0.35 | NM_172254.2 |  |
| LOC380692     | 16104 | 1.58 | 0.55 | XM_354604.1 |  |
| Ruvbl2        | 2770  | 1.58 | 0.66 | NM_011304.1 |  |
| Gtpbp8        | 419   | 1.58 | 0.28 |             |  |
| Dctn1         | 1063  | 1.58 | 0.52 | NM_007835   |  |
| LOC386195     | 53    | 1.58 | 0.41 | XM_359113.1 |  |
| Psma2         | 14381 | 1.58 | 0.21 | NM_008944.1 |  |
| 0610012D17Rik | 4346  | 1.58 | 0.30 | NM_025329.1 |  |
| Ccdc59        | 1279  | 1.58 | 0.47 |             |  |
| LOC384338     | 59    | 1.58 | 0.30 | XM_357585.1 |  |
| Cotl1         | 2212  | 1.58 | 0.84 | XM_150115.1 |  |
| Bcl3          | 279   | 1.58 | 0.89 | NM_033601.1 |  |
| LOC215098     | 227   | 1.58 | 0.54 | XM_145665.1 |  |
| Sfpi1         | 75    | 1.58 | 0.43 | NM_011355.1 |  |
| Psma7         | 10330 | 1.58 | 0.56 | NM_011969.1 |  |
| Cmtm7         | 690   | 1.58 | 0.68 |             |  |
| 2010005A06Rik | 605   | 1.58 | 0.99 | NM_029357.2 |  |
| D830031G23Rik | 54    | 1.58 | 0.27 | AK085933    |  |
| LOC381629     | 3377  | 1.58 | 0.47 | XM_355589.1 |  |
| 6030458P06Rik | 265   | 1.58 | 0.66 | AK031605    |  |
| Slc25a28      | 3373  | 1.58 | 0.22 | NM_145156.1 |  |
| Cmtm8         | 904   | 1.58 | 0.74 |             |  |
| Nxt1          | 1115  | 1.58 | 0.44 | NM_019761.4 |  |
| Gja9          | 110   | 1.58 | 0.32 | NM_010290.2 |  |
| 1810022K09Rik | 5450  | 1.58 | 0.20 | XM_485210   |  |
| Itgb5         | 1177  | 1.58 | 0.27 | NM_010580   |  |
| E030040J22Rik | 75    | 1.58 | 0.74 | AK087262    |  |
| Ecsit         | 1182  | 1.58 | 0.11 |             |  |
| 3110021A11Rik | 116   | 1.57 | 0.22 |             |  |
| C79267        | 556   | 1.57 | 0.42 | NM_183148.1 |  |

|                |       |      |      |             |  |
|----------------|-------|------|------|-------------|--|
| Bcl6           | 662   | 1.57 | 0.23 | NM_009744.2 |  |
| Rnf110         | 87    | 1.57 | 0.75 | NM_009545.1 |  |
| LOC219106      | 1130  | 1.57 | 0.41 | XM_139078.2 |  |
| 6720463E02Rik  | 172   | 1.57 | 0.45 | NM_026556.2 |  |
| 2810022L20Rik  | 94    | 1.57 | 1.00 | XM_148420.1 |  |
| Vps29          | 5369  | 1.57 | 0.51 | NM_019780.1 |  |
| 1110018K11Rik  | 2275  | 1.57 | 0.63 | AK003784    |  |
| LOC380959      | 40    | 1.57 | 1.98 | XM_354869.1 |  |
| Mettl1         | 491   | 1.57 | 0.67 | NM_010792.1 |  |
| Trmt12         | 43    | 1.57 | 0.59 |             |  |
| 9130017A15Rik  | 2224  | 1.57 | 0.45 | NM_177242.3 |  |
| 6330514E22Rik  | 87    | 1.57 | 0.57 | AK018212    |  |
| Dmrta2         | 1989  | 1.57 | 0.40 | NM_172296.1 |  |
| 5830427H10Rik  | 12109 | 1.57 | 0.40 | NM_026365.1 |  |
| LOC333830      | 148   | 1.57 | 0.18 | XM_290030.2 |  |
| Slc25a29       | 188   | 1.57 | 0.10 | NM_181328.2 |  |
| Tmed3          | 3024  | 1.57 | 0.45 |             |  |
| Yif1a          | 992   | 1.57 | 0.52 |             |  |
| Ap2s1          | 4709  | 1.57 | 0.63 |             |  |
| Comm5          | 613   | 1.57 | 0.75 | NM_025536   |  |
| 2410001H17Rik  | 1511  | 1.57 | 0.83 | NM_025889   |  |
| Tatdn2         | 230   | 1.57 | 0.64 |             |  |
| rp9            | 1843  | 1.57 | 0.47 |             |  |
| Mrps18a        | 2309  | 1.57 | 0.68 | NM_026768.1 |  |
| Galt           | 464   | 1.57 | 0.28 | NM_016658.1 |  |
| scl0001163.1_8 | 173   | 1.57 | 0.06 |             |  |
| 3110053G12Rik  | 550   | 1.57 | 0.36 | AK014211    |  |
| Trappc4        | 3250  | 1.57 | 0.54 | NM_021789.2 |  |
| Pdcd5          | 646   | 1.57 | 0.52 | NM_019746.2 |  |
| 5830409B07Rik  | 220   | 1.57 | 0.54 |             |  |
| Gdap11l        | 951   | 1.57 | 0.31 | NM_144891.1 |  |
| Col18a1        | 1225  | 1.57 | 0.19 | NM_009929.2 |  |
| Ppargc1b       | 348   | 1.57 | 1.32 | NM_133249   |  |
| Rab3a          | 461   | 1.57 | 0.58 | NM_009001.2 |  |
| Gpx4           | 2708  | 1.57 | 0.55 | NM_008162   |  |
| Gt(ROSA)26Sor  | 91    | 1.57 | 0.61 |             |  |
| 1500001L15Rik  | 4537  | 1.57 | 0.45 | XM_127738.3 |  |
| Exosc7         | 6522  | 1.57 | 0.42 | XM_284543.2 |  |
| 1700011J10Rik  | 246   | 1.57 | 0.34 | NM_183265   |  |
| 1810073E21Rik  | 455   | 1.57 | 0.54 | NM_025960.2 |  |
| 2010205O06Rik  | 221   | 1.57 | 0.62 |             |  |
| 0610038D11Rik  | 1053  | 1.57 | 0.50 | NM_026306   |  |
| LOC381398      | 5976  | 1.56 | 0.45 | XM_355356.1 |  |
| 5730543M03Rik  | 772   | 1.56 | 0.26 | AK017820    |  |
| Padi3          | 142   | 1.56 | 0.19 | NM_011060.1 |  |
| Dgcr6          | 526   | 1.56 | 0.46 | NM_010047.1 |  |
| Rpl18a         | 10171 | 1.56 | 0.40 | XM_194410.2 |  |
| Uck2           | 4049  | 1.56 | 0.42 |             |  |
| Slc22a1        | 522   | 1.56 | 0.17 | NM_009202.2 |  |
| 1700072I22Rik  | 146   | 1.56 | 0.23 |             |  |
| 0610010K14Rik  | 797   | 1.56 | 0.63 | NM_026757.1 |  |
| 2310033P09Rik  | 405   | 1.56 | 0.52 | NM_024210.1 |  |
| Sirt6          | 187   | 1.56 | 0.34 | NM_181586.2 |  |
| Brp16          | 1434  | 1.56 | 0.55 | NM_021555.1 |  |
| Elov1          | 1087  | 1.56 | 0.36 | NM_019422.1 |  |
| Rps6           | 7848  | 1.56 | 0.58 | AK013825    |  |
| Immp2l         | 852   | 1.56 | 0.57 | NM_053122.2 |  |
| Ssna1          | 4849  | 1.56 | 0.46 |             |  |
| Vgll4          | 163   | 1.56 | 0.59 | NM_177683.2 |  |
| Stx1a          | 66    | 1.56 | 0.30 | NM_016801.2 |  |
| BC025575       | 521   | 1.56 | 0.35 | NM_199200.1 |  |
| 0610027O18Rik  | 1650  | 1.56 | 0.73 | NM_025339.2 |  |
| LOC381330      | 8267  | 1.56 | 0.32 | XM_355288.1 |  |
| Psmb5          | 603   | 1.56 | 0.21 | NM_011186.1 |  |
| Rpl24          | 25691 | 1.56 | 0.46 | NM_024218.2 |  |
| 2310047N01Rik  | 102   | 1.56 | 1.04 | XM_131719.3 |  |
| Cryba2         | 7564  | 1.56 | 0.36 | NM_021541.1 |  |
| 0610033H09Rik  | 5965  | 1.56 | 0.42 | NM_025338.1 |  |

|               |       |      |      |             |  |
|---------------|-------|------|------|-------------|--|
| Zdhhc12       | 2273  | 1.56 | 0.47 | NM_025428.1 |  |
| LOC234640     | 794   | 1.56 | 0.31 | XM_125126.3 |  |
| Apoa1bp       | 1662  | 1.56 | 0.54 | NM_144897   |  |
| BC048546      | 1107  | 1.56 | 0.39 |             |  |
| Ugalt2        | 4286  | 1.56 | 0.55 | NM_016752.1 |  |
| Ppil1         | 1056  | 1.56 | 0.50 | NM_026845.1 |  |
| Resp18        | 14266 | 1.56 | 0.25 | NM_009049.1 |  |
| Eif5a         | 5533  | 1.56 | 0.58 | AY129326    |  |
| AI428936      | 531   | 1.56 | 0.71 | NM_153577.1 |  |
| Zfp511        | 1864  | 1.56 | 1.00 | XM_489210   |  |
| Srp14         | 5960  | 1.56 | 0.39 | NM_009273.2 |  |
| 1110011K10Rik | 1406  | 1.55 | 0.31 | NM_170777.3 |  |
| Tspan4        | 255   | 1.55 | 0.45 |             |  |
| C130020C07Rik | 464   | 1.55 | 0.16 | AK047886    |  |
| Chchd6        | 2209  | 1.55 | 0.44 |             |  |
| Thrsp         | 230   | 1.55 | 0.55 | AK050300    |  |
| 0610006I08Rik | 1773  | 1.55 | 0.65 | NM_025791.1 |  |
| 2310047B19Rik | 605   | 1.55 | 0.24 | XM_150151.2 |  |
| 3010027N08Rik | 1598  | 1.55 | 0.49 | AK019398    |  |
| LOC381799     | 20253 | 1.55 | 0.49 | XM_355801.1 |  |
| 6030448M23Rik | 88    | 1.55 | 0.45 | NM_175339.2 |  |
| Tbc1d13       | 360   | 1.55 | 1.07 | NM_146252.1 |  |
| Sod1          | 7058  | 1.55 | 0.51 | AK080908    |  |
| Ina           | 1424  | 1.55 | 0.65 | NM_146100.2 |  |
| Gadd45b       | 215   | 1.55 | 0.38 | NM_008655.1 |  |
| BC040823      | 2298  | 1.55 | 0.20 | NM_177727   |  |
| 4933402J24Rik | 325   | 1.55 | 0.15 | XM_131279   |  |
| Mt1           | 49912 | 1.55 | 0.35 | NM_013602.2 |  |
| Mrpl13        | 1919  | 1.55 | 0.24 | NM_026759.2 |  |
| Rad23a        | 257   | 1.55 | 0.32 | AK009733    |  |
| Adam15        | 219   | 1.55 | 0.45 | NM_009614.1 |  |
| E2f4          | 212   | 1.55 | 0.74 |             |  |
| 4833420N02Rik | 470   | 1.55 | 0.39 | NM_183263.1 |  |
| Nme3          | 261   | 1.55 | 0.69 | NM_019730.1 |  |
| 9630046P06Rik | 108   | 1.55 | 0.35 | AK036231    |  |
| 1700041B20Rik | 1327  | 1.55 | 0.16 | XM_485065   |  |
| Anp32a        | 1403  | 1.55 | 0.27 | NM_009672.2 |  |
| 6330578E17Rik | 48    | 1.55 | 1.01 | NM_198006.1 |  |
| Cstb          | 9749  | 1.55 | 0.69 | NM_007793.2 |  |
| Anxa5         | 2853  | 1.55 | 0.26 | NM_009673.1 |  |
| LOC380625     | 4071  | 1.55 | 0.11 | XM_358378.1 |  |
| Rabggtb       | 1876  | 1.55 | 0.41 | AF231926    |  |
| 2810002N01Rik | 1314  | 1.55 | 0.87 | NM_026511.1 |  |
| Cebpg         | 1805  | 1.55 | 0.64 | AK050634    |  |
| 2610305J24Rik | 3409  | 1.55 | 0.73 | AK011989    |  |
| Tubg1         | 3552  | 1.55 | 0.13 | NM_134024.1 |  |
| Psmb4         | 15219 | 1.55 | 0.62 | NM_008945.1 |  |
| Supt4h        | 488   | 1.55 | 0.47 | NM_009296   |  |
| 425O18-1      | 235   | 1.55 | 0.40 | NM_019421   |  |
| Hist1h4k      | 63    | 1.55 | 0.09 | NM_178211.1 |  |
| Pem           | 25591 | 1.54 | 0.49 | NM_008818.1 |  |
| Stra13        | 182   | 1.54 | 0.46 | NM_016665.1 |  |
| Rpl7a         | 7568  | 1.54 | 0.48 | NM_013721   |  |
| Tspo          | 1907  | 1.54 | 0.50 |             |  |
| Nle1          | 744   | 1.54 | 0.22 |             |  |
| 1110012D08Rik | 309   | 1.54 | 0.41 | NM_178066.2 |  |
| Sdf2          | 2388  | 1.54 | 0.43 | NM_009143.2 |  |
| Vdrip         | 371   | 1.54 | 0.14 | NM_026119.2 |  |
| 1190028F09    | 1220  | 1.54 | 0.23 |             |  |
| Nrtn          | 114   | 1.54 | 0.35 | NM_008738.1 |  |
| Hdh3          | 698   | 1.54 | 0.43 | NM_024257.1 |  |
| 1110017O22Rik | 339   | 1.54 | 0.36 | NM_183250.1 |  |
| Ubl4          | 2322  | 1.54 | 0.11 | NM_145405.1 |  |
| Zfp592        | 512   | 1.54 | 0.49 | NM_178707.2 |  |
| Exosc1        | 3385  | 1.54 | 0.47 | NM_025644.3 |  |
| LOC241593     | 124   | 1.54 | 0.18 | XM_141408.2 |  |
| Rps3a         | 2365  | 1.54 | 0.40 | NM_016959.2 |  |
| 5031436O03Rik | 2738  | 1.54 | 0.21 |             |  |

|               |       |      |      |             |  |
|---------------|-------|------|------|-------------|--|
| BC008150      | 846   | 1.54 | 0.84 | XM_484507   |  |
| LOC385843     | 62    | 1.54 | 0.67 | XM_358967.1 |  |
| LOC380983     | 5992  | 1.54 | 0.31 | XM_354894.1 |  |
| Arhgdig       | 963   | 1.54 | 0.78 | NM_008113.2 |  |
| D12Ert647e    | 3243  | 1.54 | 0.53 | NM_026790.1 |  |
| Impa2         | 333   | 1.54 | 0.39 | NM_053261   |  |
| LOC382251     | 108   | 1.54 | 0.62 | XM_356365.1 |  |
| Rwdd1         | 4479  | 1.54 | 0.48 | NM_025614   |  |
| BC028440      | 298   | 1.54 | 0.34 | NM_172148.1 |  |
| 1300010A20Rik | 168   | 1.54 | 0.43 | NM_146173.1 |  |
| 5730417B17Rik | 97    | 1.54 | 0.71 | AK017569    |  |
| Pold2         | 1370  | 1.54 | 0.32 | NM_008894.1 |  |
| 2210021J22Rik | 469   | 1.54 | 0.47 | NM_197998   |  |
| Lgals4        | 261   | 1.54 | 0.13 | NM_010706.1 |  |
| Hras1         | 1734  | 1.54 | 0.60 | NM_008284.1 |  |
| AI256711      | 92    | 1.54 | 0.22 | NM_023059.1 |  |
| LOC226574     | 29271 | 1.54 | 0.72 | XM_123556.2 |  |
| Tmem161a      | 389   | 1.54 | 0.53 |             |  |
| Rps5          | 18804 | 1.54 | 0.63 | NM_009095   |  |
| BC051227      | 1445  | 1.54 | 0.43 | NM_183170.1 |  |
| Dctn3         | 5159  | 1.53 | 0.53 | NM_016890.2 |  |
| LOC232890     | 12564 | 1.53 | 0.19 | XM_145374.2 |  |
| 6820428D13    | 673   | 1.53 | 0.42 | NM_177752.2 |  |
| 1700027N10Rik | 1793  | 1.53 | 0.68 | NM_029338   |  |
| E330040E10Rik | 65    | 1.53 | 0.53 | AK054549    |  |
| Spna1         | 53    | 1.53 | 0.50 | NM_011465.2 |  |
| Chd8          | 1797  | 1.53 | 0.18 | NM_201637.1 |  |
| Noc4          | 863   | 1.53 | 0.42 | NM_010926.1 |  |
| Ndufs4        | 3092  | 1.53 | 0.36 | NM_010887.1 |  |
| Igf2r         | 2601  | 1.53 | 0.19 | NM_010515.1 |  |
| LOC224813     | 554   | 1.53 | 0.11 | XM_128651.3 |  |
| Snta1         | 186   | 1.53 | 0.68 | NM_009228.1 |  |
| Bex2          | 13939 | 1.53 | 0.53 | NM_009749   |  |
| Cyb5d2        | 43    | 1.53 | 1.12 |             |  |
| BC038925      | 298   | 1.53 | 0.51 | NM_177878.1 |  |
| Fbl           | 9810  | 1.53 | 0.43 | NM_007991.2 |  |
| 5430413I02Rik | 84    | 1.53 | 0.25 | NM_019976.1 |  |
| 6720456B07Rik | 8277  | 1.53 | 0.48 | NM_133937.1 |  |
| Diablo        | 3553  | 1.53 | 0.51 | NM_023232.2 |  |
| Pus1          | 878   | 1.53 | 0.48 | NM_019700.2 |  |
| 2510012J08Rik | 996   | 1.53 | 0.17 | XM_137157.5 |  |
| Snrpa         | 2440  | 1.53 | 0.50 | NM_015782.2 |  |
| Pla2g4b       | 82    | 1.53 | 0.34 | XM_358347.1 |  |
| 1500001H12Rik | 786   | 1.53 | 0.46 | NM_021316.2 |  |
| B130019G13Rik | 2317  | 1.53 | 0.56 |             |  |
| mt-Co2        | 9983  | 1.53 | 0.35 |             |  |
| Etohd2        | 459   | 1.53 | 0.37 |             |  |
| Rohn          | 271   | 1.53 | 0.46 | NM_009708.1 |  |
| 2810453I06Rik | 402   | 1.53 | 0.32 | NM_026050   |  |
| 6030457N17Rik | 3471  | 1.53 | 0.47 | XM_133378.3 |  |
| Comm7         | 1403  | 1.53 | 0.37 | NM_133850.1 |  |
| Spc24         | 238   | 1.53 | 0.28 |             |  |
| AI314976      | 114   | 1.53 | 0.55 | NM_207219   |  |
| Eef1d         | 1458  | 1.53 | 0.37 | NM_023240.1 |  |
| Pttg1         | 118   | 1.53 | 0.15 | NM_013917.1 |  |
| Nip7          | 642   | 1.53 | 0.41 |             |  |
| Bdh           | 1344  | 1.53 | 0.07 | NM_175177   |  |
| Lst1          | 127   | 1.53 | 0.31 | XM_359281.1 |  |
| 2610014I16Rik | 640   | 1.53 | 0.45 |             |  |
| 1810009M01Rik | 4437  | 1.53 | 0.33 | NM_023056.2 |  |
| Hist1h2bl     | 124   | 1.53 | 0.45 | NM_178199   |  |
| 3830430K15Rik | 484   | 1.53 | 0.38 | AK028375    |  |
| Xrcc3         | 112   | 1.53 | 0.57 | NM_028875.1 |  |
| Nola3         | 3063  | 1.53 | 0.27 | NM_025403.1 |  |
| 2010315L10Rik | 2181  | 1.53 | 0.41 | NM_029768.2 |  |
| Grasp         | 308   | 1.53 | 0.20 | AK051199    |  |
| Pa2g4         | 3317  | 1.53 | 0.42 | NM_011119   |  |
| Hint3         | 1225  | 1.52 | 0.65 | NM_025798.2 |  |

|                 |       |      |      |             |  |
|-----------------|-------|------|------|-------------|--|
| 1700037C18Rik   | 98    | 1.52 | 0.45 | XM_484521   |  |
| 4833408A19Rik   | 181   | 1.52 | 0.33 | NM_175203.2 |  |
| 2410018G23Rik   | 4795  | 1.52 | 0.10 | NM_027194.1 |  |
| Ddit3           | 2665  | 1.52 | 0.40 | NM_007837.2 |  |
| Pou4f1          | 123   | 1.52 | 0.53 | XM_135366.3 |  |
| 2610002J02Rik   | 2721  | 1.52 | 0.64 | XM_131827.3 |  |
| Krt1-14         | 289   | 1.52 | 0.30 | NM_016958.1 |  |
| Ebpl            | 890   | 1.52 | 0.37 | NM_026598.1 |  |
| Znhit2          | 1461  | 1.52 | 0.21 | NM_013859.1 |  |
| AW551984        | 349   | 1.52 | 0.30 | NM_178737.3 |  |
| scl0001375.1_63 | 88    | 1.52 | 0.16 |             |  |
| Ctsr            | 70    | 1.52 | 0.23 | NM_020284.1 |  |
| 1110035H17Rik   | 207   | 1.52 | 0.35 |             |  |
| Gstm4           | 144   | 1.52 | 0.40 | NM_026764.2 |  |
| S100a11         | 3237  | 1.52 | 0.39 | NM_016740   |  |
| Mid1ip1         | 1119  | 1.52 | 1.04 | NM_026524.2 |  |
| 2810001G20Rik   | 199   | 1.52 | 0.73 |             |  |
| Ttyh2           | 175   | 1.52 | 0.10 | NM_053273.1 |  |
| 3300001G02Rik   | 1659  | 1.52 | 0.49 | NM_030093   |  |
| Ifi35           | 251   | 1.52 | 0.50 | NM_027320.1 |  |
| 9030612E09Rik   | 207   | 1.52 | 0.18 | NM_172419.1 |  |
| Fcf1            | 2743  | 1.52 | 0.33 |             |  |
| 2610205E22Rik   | 1075  | 1.52 | 0.46 | NM_170592.1 |  |
| LOC230253       | 10686 | 1.52 | 0.57 | XM_124269.2 |  |
| Gpr113          | 2922  | 1.52 | 0.27 |             |  |
| 1110025I09Rik   | 354   | 1.52 | 0.52 | NM_026795.1 |  |
| D10Jhu81e       | 1220  | 1.52 | 0.80 | NM_138601.1 |  |
| LOC383883       | 507   | 1.52 | 0.28 | XM_357307.1 |  |
| 2210407N10Rik   | 853   | 1.52 | 0.45 | AK008848    |  |
| scl0001489.1_43 | 49    | 1.52 | 0.76 |             |  |
| 3110030K17Rik   | 447   | 1.52 | 0.10 | XM_131770.3 |  |
| Prdx1           | 8963  | 1.52 | 0.49 | NM_011034.2 |  |
| Fth1            | 36996 | 1.52 | 0.19 | NM_010239.1 |  |
| Mcts1           | 7067  | 1.52 | 0.64 | NM_026902.1 |  |
| Sfrs9           | 5266  | 1.52 | 0.45 | NM_025573.2 |  |
| BC047219        | 341   | 1.52 | 0.35 | NM_201355.2 |  |
| 1110058L19Rik   | 3725  | 1.52 | 0.68 | NM_026503.1 |  |
| Mnd1            | 836   | 1.52 | 0.41 |             |  |
| 1700007P14Rik   | 217   | 1.52 | 0.80 |             |  |
| Tusc4           | 2576  | 1.52 | 0.15 | NM_018879.1 |  |
| A030007L17Rik   | 127   | 1.52 | 0.46 | NM_026637.2 |  |
| LOC381999       | 25733 | 1.51 | 0.52 | XM_356062.1 |  |
| Gmpr2           | 425   | 1.51 | 0.08 | NM_177992.1 |  |
| Hax1            | 5044  | 1.51 | 0.40 |             |  |
| Acot7           | 3090  | 1.51 | 0.58 |             |  |
| 9430098E02Rik   | 102   | 1.51 | 0.40 | XM_134253.3 |  |
| Pcdh12          | 42    | 1.51 | 0.77 | NM_017378   |  |
| Eif3s2          | 13992 | 1.51 | 0.40 | AK089340    |  |
| Ppan            | 1936  | 1.51 | 0.14 | NM_145610   |  |
| 2510015F01Rik   | 4962  | 1.51 | 0.20 | XM_354801.1 |  |
| Def6            | 352   | 1.51 | 0.30 | NM_027185.1 |  |
| Fis1            | 2353  | 1.51 | 0.32 |             |  |
| Slc25a19        | 736   | 1.51 | 0.33 | NM_026071.1 |  |
| Wfdc6a          | 74    | 1.51 | 0.30 |             |  |
| 4930522L14Rik   | 343   | 1.51 | 0.17 |             |  |
| C130038G02Rik   | 856   | 1.51 | 0.24 | NM_029920.3 |  |
| Lzf             | 618   | 1.51 | 0.90 | NM_133185   |  |
| Trim41          | 1440  | 1.51 | 0.51 | NM_145377   |  |
| 2310033F14Rik   | 1261  | 1.51 | 0.10 |             |  |
| Sncb            | 3202  | 1.51 | 0.73 | NM_033610.2 |  |
| LOC98434        | 1599  | 1.51 | 0.26 |             |  |
| Cst3            | 8524  | 1.51 | 0.37 | NM_009976.2 |  |
| LOC242916       | 128   | 1.51 | 0.34 | XM_144254.3 |  |
| Ubt1            | 115   | 1.51 | 0.27 | NM_145500.2 |  |
| 3110040N11Rik   | 626   | 1.51 | 0.53 | NM_026077.1 |  |
| 2610019I03Rik   | 414   | 1.51 | 0.32 | NM_025639.2 |  |
| 6720458F09Rik   | 3662  | 1.51 | 0.49 | NM_177374.2 |  |
| Parl            | 11814 | 1.51 | 0.29 |             |  |

|               |       |      |      |             |  |
|---------------|-------|------|------|-------------|--|
| 1200009C21Rik | 4451  | 1.51 | 0.39 | NM_028659.1 |  |
| 2310008M10Rik | 7107  | 1.51 | 0.50 | NM_025509.2 |  |
| D730006F06Rik | 60    | 1.51 | 0.45 | AK052794    |  |
| C730009D12    | 820   | 1.51 | 0.71 |             |  |
| Cdc42ep1      | 51    | 1.51 | 0.40 | NM_027219.1 |  |
| Qrich2        | 55    | 1.51 | 0.75 |             |  |
| 1110032A13Rik | 1974  | 1.51 | 0.14 | NM_199197.1 |  |
| Prrg2         | 851   | 1.51 | 0.54 | NM_022999.1 |  |
| Serpine2      | 5865  | 1.51 | 0.46 | NM_009255.2 |  |
| Dncl1         | 1412  | 1.51 | 0.50 | NM_019682   |  |
| Ykt6          | 3324  | 1.51 | 0.35 |             |  |
| Ftl1          | 10434 | 1.51 | 0.33 | NM_010240.1 |  |
| Pla2g5        | 87    | 1.51 | 0.54 | NM_011110.2 |  |
| 2210021A15Rik | 2996  | 1.51 | 0.23 | NM_020000.1 |  |
| D17Wsu104e    | 992   | 1.51 | 0.66 | NM_080837.1 |  |
| C330034C07Rik | 96    | 1.51 | 0.11 | AK082825    |  |
| LOC381365     | 3155  | 1.51 | 0.05 | XM_355330.1 |  |
| 2310003L22Rik | 660   | 1.51 | 0.29 | NM_027093.1 |  |
| Klf16         | 591   | 1.51 | 0.24 | NM_078477   |  |
| Vrk3          | 658   | 1.51 | 0.45 |             |  |
| B230317C12Rik | 692   | 1.51 | 0.42 | NM_019833.1 |  |
| EG384814      | 199   | 1.51 | 0.08 |             |  |
| 2310044H10Rik | 5100  | 1.51 | 0.12 | NM_197991   |  |
| 2700062C07Rik | 614   | 1.51 | 0.47 | NM_026529   |  |
| Thrap6        | 1774  | 1.51 | 0.92 | NM_027212.1 |  |
| Rps20         | 28777 | 1.51 | 0.29 | NM_026147   |  |
| LOC193533     | 685   | 1.50 | 0.54 | XM_110067.2 |  |
| Ap4s1         | 1084  | 1.50 | 0.50 | NM_021710.1 |  |
| 0610007L01Rik | 1502  | 1.50 | 0.42 | AK002297    |  |
| 2310040A07Rik | 933   | 1.50 | 0.45 |             |  |
| 1700023M09Rik | 3421  | 1.50 | 0.40 | NM_025498.2 |  |
| Dusp15        | 61    | 1.50 | 0.41 | NM_145744.1 |  |
| Gt4-1         | 61    | 1.50 | 0.26 | NM_181860.1 |  |
| Tmpit         | 1216  | 1.50 | 0.67 | NM_172541.1 |  |
| 3200002M19Rik | 147   | 1.50 | 0.15 | NM_027532   |  |
| Otub1         | 879   | 1.50 | 0.61 | NM_134150.1 |  |
| mtDNA_ND2     | 28996 | 1.50 | 0.10 |             |  |
| Ndufab1       | 73    | 1.50 | 0.21 | NM_028177.2 |  |
| Tex264        | 1440  | 1.50 | 0.08 | NM_011573.1 |  |
| D10Erd214e    | 996   | 1.50 | 0.54 | NM_134007.2 |  |
| 1700013H19Rik | 283   | 1.50 | 0.62 | NM_027954.1 |  |
| Psm8          | 214   | 1.50 | 0.35 | NM_026545.1 |  |
| Ada           | 290   | 1.50 | 0.22 | NM_007398.2 |  |
| AU067744      | 7992  | 1.50 | 0.39 | NM_172529.1 |  |
| Ndufa10       | 6192  | 1.50 | 0.39 | NM_024197   |  |
| 1700021C14Rik | 595   | 1.50 | 0.49 | XM_355444.1 |  |
| LOC381114     | 15609 | 1.50 | 0.34 | XM_355032.1 |  |
| Hal           | 135   | 1.50 | 0.29 | NM_010401.3 |  |
| 1200003N10Rik | 44    | 1.50 | 0.80 | AK004585    |  |
| 2310061C15Rik | 89    | 1.50 | 0.74 | NM_026844.2 |  |
| Ankrd2        | 96    | 1.50 | 0.40 | NM_020033.1 |  |
| Ring1         | 465   | 1.50 | 0.31 | NM_009066   |  |
| 2310079P12Rik | 465   | 1.50 | 0.91 | XM_203577.2 |  |
| Ptpn11        | 3034  | 1.50 | 0.27 | NM_011202.2 |  |
| Crhr1         | 97    | 1.50 | 0.22 | NM_007762.1 |  |
| Fbxo46        | 137   | 1.50 | 0.08 | NM_175530.2 |  |
| 1110049N09Rik | 259   | 1.50 | 0.28 | AK004213    |  |
| Cox6c         | 7374  | 1.50 | 0.22 | NM_053071.1 |  |
| Msx1          | 818   | 1.50 | 0.72 | AK081534    |  |
| Jrk           | 44    | 1.50 | 1.29 | NM_008415.3 |  |
| Gm129         | 826   | 1.50 | 0.48 |             |  |
| 3110024A21Rik | 338   | 1.50 | 0.45 | NM_024215.1 |  |
| LOC381230     | 3122  | 1.50 | 0.49 | XM_355167.1 |  |
| Zfp637        | 1808  | 1.50 | 0.71 | NM_177684.2 |  |
| Rrbp1         | 838   | 1.50 | 0.10 | NM_133626.1 |  |
| Atp6v0e       | 7271  | 1.50 | 0.51 | NM_025272.1 |  |
| Clic1         | 657   | 1.50 | 0.17 | NM_033444.1 |  |
| 1700123O20Rik | 641   | 1.50 | 0.57 | NM_021437.1 |  |

|                |      |      |      |             |  |
|----------------|------|------|------|-------------|--|
| P42pop         | 139  | 1.50 | 0.06 | NM_145579.1 |  |
| Grpel1         | 1924 | 1.50 | 0.37 | NM_024478.2 |  |
| AI851076       | 773  | 1.50 | 0.41 | XM_110955.2 |  |
| TxnI4          | 5133 | 1.50 | 0.53 | NM_025299.1 |  |
| LOC230602      | 66   | 1.50 | 0.37 | XM_149473.1 |  |
| Mrps7          | 2663 | 1.50 | 0.20 | NM_025305.1 |  |
| Fbxo2          | 120  | 1.50 | 0.24 | NM_176848.1 |  |
| Nsfl1c         | 2160 | 1.50 | 0.45 | NM_198326.1 |  |
| LOC234987      | 2429 | 1.50 | 0.35 | XM_134668.2 |  |
| Ccdc95         | 340  | 1.50 | 1.06 |             |  |
| Sepm           | 250  | 1.49 | 0.32 | NM_053267.1 |  |
| Tm4sf9         | 41   | 1.49 | 0.68 | NM_019571.1 |  |
| 2900055D14Rik  | 138  | 1.49 | 1.17 | NM_028411.1 |  |
| Ptp4a3         | 551  | 1.49 | 0.40 | NM_008975.2 |  |
| Nme6           | 400  | 1.49 | 0.33 | NM_018757.1 |  |
| Akr7a5         | 2447 | 1.49 | 0.49 | NM_025337.2 |  |
| Snrb           | 2878 | 1.49 | 0.55 | NM_009225.1 |  |
| Gdf15          | 2962 | 1.49 | 0.41 | NM_011819.1 |  |
| Gap43          | 4110 | 1.49 | 0.33 | NM_008083   |  |
| Ppp1r14b       | 3435 | 1.49 | 0.27 | NM_008889.1 |  |
| 2310043N10Rik  | 534  | 1.49 | 0.56 |             |  |
| Zfp297         | 418  | 1.49 | 0.22 | NM_020625.2 |  |
| Apip           | 476  | 1.49 | 0.52 |             |  |
| Lamb3          | 289  | 1.49 | 0.45 | NM_008484.1 |  |
| Hrmt1l2        | 4525 | 1.49 | 0.48 | NM_019830.1 |  |
| 2810437L13Rik  | 2607 | 1.49 | 0.45 | NM_197980.1 |  |
| 5730437N04Rik  | 2250 | 1.49 | 0.43 | NM_027457.2 |  |
| scl0003177.1_2 | 65   | 1.49 | 0.80 |             |  |
| 1110008J03Rik  | 192  | 1.49 | 0.34 | NM_029096.1 |  |
| AI839920       | 508  | 1.49 | 0.37 | NM_182996.2 |  |
| Gtpbp3         | 546  | 1.49 | 0.50 | NM_032544.2 |  |
| 4933429E06Rik  | 109  | 1.49 | 0.34 | AK016980    |  |
| Acp1           | 266  | 1.49 | 0.46 | AK019186    |  |
| 3110021E02Rik  | 71   | 1.49 | 0.53 |             |  |
| Mdh2           | 3992 | 1.49 | 0.36 | NM_008617.2 |  |
| LOC382972      | 393  | 1.49 | 0.94 | XM_356781.1 |  |
| Ppie           | 540  | 1.49 | 0.49 | NM_019489.2 |  |
| 4732471N16Rik  | 52   | 1.49 | 0.94 | AK028934    |  |
| Gng12          | 716  | 1.49 | 0.49 | AK005561    |  |
| LOC382245      | 1662 | 1.49 | 0.27 | XM_356361.1 |  |
| Nme4           | 362  | 1.49 | 0.69 | NM_019731.1 |  |
| 1810029G24Rik  | 1429 | 1.49 | 0.06 | NM_025468.1 |  |
| Commd1         | 2365 | 1.49 | 0.52 | NM_144514.1 |  |
| BC025872       | 90   | 1.49 | 0.56 | NM_178593.2 |  |
| 2900010D03Rik  | 3608 | 1.49 | 0.51 | NM_201226.1 |  |
| Tceal8         | 2357 | 1.49 | 0.45 | NM_025703.2 |  |
| 4933427G23     | 849  | 1.49 | 0.73 | XM_284069   |  |
| H60            | 426  | 1.49 | 0.04 | XM_136972.3 |  |
| LOC654842      | 536  | 1.49 | 0.50 |             |  |
| Pycr2          | 4330 | 1.49 | 0.59 | NM_133705.1 |  |
| Itgp           | 44   | 1.49 | 0.67 | AK043151    |  |
| Nqo2           | 187  | 1.49 | 0.17 | NM_020282.2 |  |
| 2610205H19Rik  | 272  | 1.49 | 0.46 | NM_027430.1 |  |
| LOC241737      | 1802 | 1.49 | 0.24 | XM_141567.3 |  |
| Mad2l2         | 460  | 1.49 | 0.63 | NM_027985.1 |  |
| Rpp30          | 507  | 1.49 | 0.47 | NM_019428.2 |  |
| Srp19          | 137  | 1.49 | 0.47 | NM_025527.1 |  |
| 1700028N11Rik  | 1037 | 1.49 | 0.44 | NM_029341.1 |  |
| Slc16a3        | 70   | 1.49 | 1.18 |             |  |
| 9530051E16Rik  | 78   | 1.49 | 0.09 | AK079246    |  |
| Ssfa1          | 270  | 1.49 | 0.38 | XM_196564.2 |  |
| 4833420K19Rik  | 2905 | 1.49 | 0.24 | NM_029775.1 |  |
| 1810059G22Rik  | 540  | 1.49 | 0.61 | NM_026325.1 |  |
| Rasa3          | 593  | 1.49 | 0.34 | NM_009025.1 |  |
| 1810008A18Rik  | 1491 | 1.49 | 0.07 | NM_133998.1 |  |
| Scamp3         | 259  | 1.49 | 0.43 | NM_011886.1 |  |
| Htati2         | 2202 | 1.49 | 0.41 | AK015389    |  |
| Arpc1b         | 1302 | 1.49 | 0.41 | NM_023142.1 |  |

|               |       |      |      |             |  |
|---------------|-------|------|------|-------------|--|
| D2Bwg0891e    | 1589  | 1.49 | 0.41 | NM_026797.1 |  |
| Gnb1l         | 547   | 1.49 | 0.36 | NM_023120.1 |  |
| 2310036O22Rik | 3558  | 1.49 | 0.52 | NM_026760.1 |  |
| Pdgfa         | 150   | 1.49 | 0.18 | NM_008808   |  |
| 2210013O21Rik | 7245  | 1.49 | 0.44 | XM_489371   |  |
| LOC231368     | 22179 | 1.48 | 0.40 | XM_144386.2 |  |
| 9330140K16Rik | 405   | 1.48 | 0.20 | NM_183019.1 |  |
| Al118078      | 650   | 1.48 | 0.38 | NM_172923.1 |  |
| Rnaset2       | 5768  | 1.48 | 0.43 | NM_026611.1 |  |
| MGC58818      | 276   | 1.48 | 0.74 | NM_198637.1 |  |
| M6prbp1       | 119   | 1.48 | 0.25 | NM_025836.1 |  |
| BC003251      | 1978  | 1.48 | 0.17 | NM_024480.2 |  |
| Hnrpa0        | 1811  | 1.48 | 0.43 | XM_354754   |  |
| Taf12         | 786   | 1.48 | 0.07 | NM_025579.1 |  |
| Mrpl48        | 1095  | 1.48 | 0.22 | NM_198831.1 |  |
| Psemb9        | 88    | 1.48 | 0.50 | NM_013585.1 |  |
| Slc39a7       | 796   | 1.48 | 0.37 | NM_008202.1 |  |
| Slc25a25      | 893   | 1.48 | 0.25 | NM_146118.2 |  |
| Tomm40        | 381   | 1.48 | 0.42 | NM_016871.1 |  |
| LOC381418     | 61    | 1.48 | 0.39 | XM_358571.1 |  |
| Snrp1c        | 435   | 1.48 | 0.29 | NM_011432.1 |  |
| Cd151         | 2987  | 1.48 | 0.48 | NM_009842   |  |
| LOC382590     | 48    | 1.48 | 0.34 | XM_356583.1 |  |
| 4933431K14Rik | 164   | 1.48 | 0.73 |             |  |
| Klhdc4        | 1303  | 1.48 | 0.15 | NM_145605.1 |  |
| Arl2          | 315   | 1.48 | 0.75 | NM_019722.3 |  |
| Hirip5        | 285   | 1.48 | 0.53 | NM_020045.1 |  |
| Alg5          | 1359  | 1.48 | 0.30 | NM_025442.1 |  |
| LOC385699     | 13095 | 1.48 | 0.26 | XM_358915.1 |  |
| Gadd45a       | 2276  | 1.48 | 0.43 | NM_007836.1 |  |
| LOC245884     | 73    | 1.48 | 0.46 | XM_149824.3 |  |
| Usmg5         | 111   | 1.48 | 0.58 | NM_023211.1 |  |
| Cklfsf4       | 515   | 1.48 | 0.09 | NM_153582.3 |  |
| Pex16         | 704   | 1.48 | 0.60 | NM_145122.1 |  |
| Rpl41         | 68872 | 1.48 | 0.29 | NM_018860.2 |  |
| 8430432A02Rik | 210   | 1.48 | 0.17 | XM_484854   |  |
| Bpnt1         | 551   | 1.48 | 0.13 | NM_011794.2 |  |
| 6330404A07Rik | 120   | 1.48 | 0.37 | NM_027537.1 |  |
| 1700022N22Rik | 47    | 1.48 | 1.13 |             |  |
| LOC381561     | 23830 | 1.48 | 0.35 | XM_355526.1 |  |
| Nit2          | 819   | 1.48 | 0.29 | NM_023175.1 |  |
| Psen2         | 68    | 1.48 | 0.64 | NM_011183.1 |  |
| Nap114        | 7120  | 1.48 | 0.19 | NM_008672   |  |
| Hamp2         | 11205 | 1.48 | 0.56 |             |  |
| G0s2          | 488   | 1.48 | 0.32 | NM_008059.1 |  |
| Camkk1        | 78    | 1.48 | 0.71 | NM_018883.1 |  |
| E230016B04Rik | 115   | 1.48 | 0.29 | AK054068    |  |
| 2210415M20Rik | 2365  | 1.48 | 0.24 | NM_027338.1 |  |
| BC019806      | 518   | 1.48 | 0.24 | NM_145460   |  |
| Selenbp1      | 2003  | 1.48 | 0.38 | NM_009150.2 |  |
| LOC381150     | 807   | 1.48 | 0.46 | XM_358516.1 |  |
| LOC229599     | 315   | 1.48 | 0.59 | XM_131070.3 |  |
| Polr2e        | 965   | 1.48 | 0.37 | XM_282920.1 |  |
| Wbscr22       | 1019  | 1.48 | 0.54 | NM_025375.1 |  |
| 1700025K23Rik | 495   | 1.48 | 0.39 | NM_183254.1 |  |
| Odc1          | 3791  | 1.48 | 0.26 | NM_013614.1 |  |
| C030023A16Rik | 66    | 1.48 | 0.27 | AK047745    |  |
| C86302        | 2555  | 1.48 | 0.53 | NM_172746.2 |  |
| Ngfrap1       | 23436 | 1.48 | 0.64 | NM_009750.1 |  |
| Hmg20b        | 642   | 1.48 | 0.67 | NM_010440.1 |  |
| Mospd3        | 234   | 1.48 | 0.85 | NM_030037.1 |  |
| Mrps6         | 3404  | 1.48 | 0.52 | NM_080456.1 |  |
| LOC268288     | 64    | 1.48 | 0.64 | XM_193552.2 |  |
| Pbxip1        | 480   | 1.48 | 0.30 | NM_146131   |  |
| LOC383802     | 228   | 1.48 | 0.51 | XM_357262.1 |  |
| Al846148      | 413   | 1.47 | 0.77 |             |  |
| D19Ert721e    | 6824  | 1.47 | 0.52 | NM_146093.1 |  |
| Frda          | 465   | 1.47 | 0.58 | NM_008044.1 |  |



|                 |       |      |      |             |  |
|-----------------|-------|------|------|-------------|--|
| Uqrcr1          | 1139  | 1.47 | 0.32 | NM_025407.2 |  |
| Elf4e13         | 975   | 1.47 | 0.30 | NM_023314.2 |  |
| Bad             | 2019  | 1.47 | 0.62 | NM_007522.1 |  |
| LOC224147       | 7873  | 1.47 | 0.23 | XM_147971.2 |  |
| Slc7a6os        | 145   | 1.47 | 0.47 |             |  |
| 2810441K11Rik   | 808   | 1.47 | 0.14 | NM_026798.1 |  |
| Cenpa           | 12222 | 1.47 | 0.32 | NM_007681.1 |  |
| Nfkbil1         | 55    | 1.47 | 0.25 | NM_010909.1 |  |
| Ccl27           | 560   | 1.47 | 0.35 | NM_011336.1 |  |
| Coq5            | 3924  | 1.47 | 0.24 |             |  |
| Gabarapl1       | 1830  | 1.47 | 0.35 | NM_020590.3 |  |
| 2810452K22Rik   | 1208  | 1.47 | 0.23 | NM_026048   |  |
| Vti1b           | 1738  | 1.47 | 0.36 | NM_016800.2 |  |
| 2810454F19Rik   | 92    | 1.47 | 1.01 |             |  |
| 2310035K24Rik   | 1103  | 1.47 | 0.11 | NM_027129.2 |  |
| Gcap27          | 19419 | 1.47 | 0.69 |             |  |
| Rpl21           | 1027  | 1.47 | 0.38 | NM_019647.3 |  |
| 2610203C22Rik   | 1009  | 1.47 | 0.17 |             |  |
| Aip             | 3960  | 1.47 | 0.73 | NM_016666   |  |
| A930005G04Rik   | 2342  | 1.47 | 0.35 |             |  |
| 2310073E15Rik   | 900   | 1.47 | 0.42 |             |  |
| scl0002007.1_97 | 87    | 1.47 | 0.45 |             |  |
| Mrps25          | 271   | 1.47 | 0.24 | NM_025578.2 |  |
| Rpl10           | 45609 | 1.47 | 0.45 | NM_052835   |  |
| 4930455C21Rik   | 888   | 1.47 | 0.19 | XM_148429.1 |  |
| 2900064A13Rik   | 510   | 1.47 | 0.27 | NM_133749.1 |  |
| Mgst3           | 1562  | 1.47 | 0.31 | NM_025569.1 |  |
| LOC382096       | 470   | 1.47 | 0.65 | XM_356177.1 |  |
| 0610039N19Rik   | 892   | 1.47 | 0.27 | NM_026159.2 |  |
| Sstr5           | 407   | 1.47 | 0.36 |             |  |
| Pycl            | 763   | 1.47 | 0.28 | NM_025412   |  |
| BC021917        | 59    | 1.47 | 1.21 | NM_145496.1 |  |
| 1700023O11Rik   | 636   | 1.47 | 0.31 | NM_029339.2 |  |
| Sbds            | 5268  | 1.47 | 0.33 | NM_023248.1 |  |
| D130066L18Rik   | 42    | 1.47 | 0.56 | AK051703    |  |
| Psap            | 14065 | 1.47 | 0.22 | NM_011179   |  |
| Zfand2b         | 826   | 1.47 | 0.40 |             |  |
| 6430402L23Rik   | 2091  | 1.47 | 0.29 | AK078178    |  |
| 1110068E08Rik   | 687   | 1.47 | 0.12 | AK004405    |  |
| Pex11a          | 266   | 1.47 | 0.34 | NM_011068   |  |
| EG638695        | 2283  | 1.47 | 0.58 |             |  |
| 5133400G04Rik   | 326   | 1.47 | 0.29 | NM_027733   |  |
| Srf             | 1137  | 1.47 | 0.36 | NM_020493.1 |  |
| D10Ert438e      | 2194  | 1.47 | 0.11 | NM_030250.1 |  |
| E430003J01Rik   | 138   | 1.47 | 0.47 | AK088080    |  |
| 39706           | 2065  | 1.47 | 0.47 |             |  |
| Slc27a1         | 104   | 1.47 | 0.79 | NM_011977.2 |  |
| Hamp            | 5155  | 1.47 | 0.30 | NM_032541.1 |  |
| 2310079N02Rik   | 658   | 1.47 | 0.40 | AK086714    |  |
| Vps25           | 2274  | 1.47 | 0.45 |             |  |
| Rps27a          | 21301 | 1.47 | 0.28 | NM_024277   |  |
| Sf3b4           | 1534  | 1.47 | 1.15 | NM_153053.3 |  |
| 2310008H09Rik   | 931   | 1.47 | 0.30 | NM_023197.1 |  |
| C130089M10Rik   | 69    | 1.47 | 0.27 | AK048628    |  |
| Pigm            | 74    | 1.47 | 0.53 | AK017103    |  |
| BC055368        | 277   | 1.47 | 0.32 | NM_183017   |  |
| B330005C17Rik   | 63    | 1.47 | 0.53 | AK080862    |  |
| C330006D17Rik   | 104   | 1.47 | 0.52 |             |  |
| Znhit4          | 479   | 1.47 | 0.73 |             |  |
| Chrac1          | 757   | 1.47 | 0.49 | NM_053068.2 |  |
| Tnfsf5ip1       | 1850  | 1.47 | 0.38 | NM_134138.1 |  |
| Nudt1           | 167   | 1.47 | 0.20 | NM_008637.1 |  |
| Arch            | 191   | 1.46 | 0.28 | NM_025970.1 |  |
| Efna1           | 384   | 1.46 | 0.25 | NM_010107.2 |  |
| 1810045K06Rik   | 2246  | 1.46 | 0.03 | XM_144142.3 |  |
| 4933433P14Rik   | 181   | 1.46 | 0.04 | NM_178613.2 |  |
| scl000158.1_101 | 490   | 1.46 | 0.52 |             |  |
| D230037D09Rik   | 190   | 1.46 | 0.26 | NM_177140.2 |  |

|                  |       |      |      |             |  |
|------------------|-------|------|------|-------------|--|
| Zfp553           | 304   | 1.46 | 0.57 | NM_146201.1 |  |
| Nspc1            | 2443  | 1.46 | 0.65 | NM_197992.1 |  |
| Nat5             | 2429  | 1.46 | 0.40 | NM_026425.1 |  |
| BC038311         | 1530  | 1.46 | 0.61 | XM_485640   |  |
| Exosc5           | 1140  | 1.46 | 0.65 | NM_138586.1 |  |
| Txn2             | 268   | 1.46 | 0.59 | NM_019913.3 |  |
| 1700029F09Rik    | 7864  | 1.46 | 0.39 | XM_355303.1 |  |
| 2010003J03Rik    | 2240  | 1.46 | 0.21 | XM_129120.4 |  |
| Slc17a7          | 232   | 1.46 | 0.74 | NM_182993.1 |  |
| Ppia             | 52198 | 1.46 | 0.37 | XM_122180.1 |  |
| Mad2l1bp         | 869   | 1.46 | 0.38 | NM_025649.1 |  |
| Nrm              | 2823  | 1.46 | 0.21 | NM_134122.1 |  |
| D4Bwg0951e       | 869   | 1.46 | 0.83 | NM_026821.2 |  |
| Chst1            | 2360  | 1.46 | 0.10 | NM_023850.1 |  |
| Cxx1b            | 133   | 1.46 | 0.80 |             |  |
| 1500011B03Rik    | 411   | 1.46 | 1.05 |             |  |
| Nkx2-5           | 334   | 1.46 | 0.77 | NM_008700.1 |  |
| 1110031I02Rik    | 968   | 1.46 | 0.16 | NM_025402.1 |  |
| A130019A16Rik    | 52    | 1.46 | 0.66 | AK037437    |  |
| Nme5             | 911   | 1.46 | 0.59 | NM_080637.1 |  |
| LOC382790        | 12403 | 1.46 | 0.31 | XM_356675.1 |  |
| Hist1h2bm        | 238   | 1.46 | 0.29 | NM_178200   |  |
| LOC381872        | 60    | 1.46 | 0.53 | XM_358666.1 |  |
| D830030K20Rik    | 98    | 1.46 | 0.46 | XM_283472.2 |  |
| Pemt             | 82    | 1.46 | 0.08 | NM_008819.2 |  |
| Pinx1            | 147   | 1.46 | 0.52 | NM_028228.1 |  |
| 4932409F11Rik    | 139   | 1.46 | 0.61 | NM_029404.1 |  |
| Laptm5           | 100   | 1.46 | 0.56 | NM_010686.2 |  |
| Sec13l1          | 10124 | 1.46 | 0.27 | NM_024206.3 |  |
| 4833422F06Rik    | 1987  | 1.46 | 0.50 | NM_198413.1 |  |
| 1110034G24Rik    | 170   | 1.46 | 0.30 | XM_130388.3 |  |
| LOC381255        | 71    | 1.46 | 0.33 | XM_355197.1 |  |
| Cetn3            | 3749  | 1.46 | 0.41 | NM_007684.2 |  |
| LOC237005        | 1235  | 1.46 | 0.72 | XM_136032.3 |  |
| Mrps22           | 960   | 1.46 | 0.32 | NM_025485   |  |
| 9430002A10Rik    | 73    | 1.46 | 0.09 | AK020399    |  |
| Hmox2            | 655   | 1.46 | 0.46 | NM_010443.1 |  |
| Cdkn3            | 1076  | 1.46 | 0.52 | XM_354809.1 |  |
| 4933439M10Rik    | 66    | 1.46 | 0.84 | AK017126    |  |
| Ccdc53           | 1535  | 1.46 | 0.55 |             |  |
| Thoc4            | 5947  | 1.46 | 0.44 | NM_011568.1 |  |
| Zfp787           | 287   | 1.46 | 0.61 |             |  |
| Ube2f            | 2903  | 1.46 | 0.33 |             |  |
| Ifnab            | 74    | 1.46 | 0.63 | NM_008336   |  |
| Cgef2-pending    | 427   | 1.46 | 0.15 | AK017479    |  |
| Sra1             | 1619  | 1.46 | 0.44 | NM_025291.1 |  |
| Ddx51            | 444   | 1.46 | 0.31 | NM_027156.2 |  |
| scl0000115.1_6_F | 178   | 1.46 | 0.49 |             |  |
| C030002N13Rik    | 745   | 1.46 | 0.33 | NM_145550.1 |  |
| 3202002H23Rik    | 115   | 1.46 | 0.22 | AK080441    |  |
| Pcnp             | 384   | 1.46 | 0.03 | XM_132579.5 |  |
| scl0001000.1_8   | 95    | 1.46 | 0.22 |             |  |
| Rpl17            | 10359 | 1.46 | 0.21 | XM_284068.2 |  |
| Aig1             | 127   | 1.46 | 0.33 | NM_025446   |  |
| 5430406J06Rik    | 342   | 1.46 | 0.40 |             |  |
| 1500015G18Rik    | 107   | 1.46 | 0.46 | AK005248    |  |
| Slc24a3          | 484   | 1.46 | 0.16 | NM_053195.1 |  |
| Galk1            | 2633  | 1.45 | 0.25 | NM_016905.1 |  |
| 2610012O22Rik    | 1018  | 1.45 | 0.40 | NM_023536   |  |
| Cbx1             | 267   | 1.45 | 0.38 | NM_007622.2 |  |
| 2310057H16Rik    | 7987  | 1.45 | 0.08 | NM_026473.2 |  |
| BC008155         | 5591  | 1.45 | 0.31 | NM_145410.1 |  |
| Stx8             | 386   | 1.45 | 0.29 | AK035105    |  |
| 3110052N05Rik    | 364   | 1.45 | 0.24 | NM_029826.1 |  |
| Upp1             | 825   | 1.45 | 0.28 | NM_009477.1 |  |
| Nt5m             | 1129  | 1.45 | 0.29 | NM_134029.1 |  |
| C330006A16Rik    | 1009  | 1.45 | 0.41 |             |  |
| Chchd5           | 726   | 1.45 | 0.13 | NM_025395.1 |  |

|                  |       |      |      |             |  |
|------------------|-------|------|------|-------------|--|
| Ddx28            | 286   | 1.45 | 0.09 | NM_028038.1 |  |
| 2210418O10Rik    | 3755  | 1.45 | 0.18 | NM_029813   |  |
| B230350I06Rik    | 75    | 1.45 | 0.63 | AK046198    |  |
| Rtn4ip1          | 540   | 1.45 | 0.27 | NM_130892.2 |  |
| LOC667250        | 1161  | 1.45 | 0.91 |             |  |
| Chmp2a           | 2521  | 1.45 | 0.27 |             |  |
| 1110034O24Rik    | 1429  | 1.45 | 0.45 | AK004102    |  |
| LOC382087        | 2727  | 1.45 | 0.72 | XM_358705.1 |  |
| Klk21            | 180   | 1.45 | 0.57 | NM_010642.1 |  |
| Nucb1            | 2696  | 1.45 | 0.26 | NM_008749.1 |  |
| 6230427J02Rik    | 111   | 1.45 | 0.45 | XM_486256   |  |
| Ppib             | 5604  | 1.45 | 0.52 | NM_011149.1 |  |
| A230106J09Rik    | 256   | 1.45 | 0.12 | AK020717    |  |
| Ralb             | 584   | 1.45 | 0.26 | NM_022327.3 |  |
| Cryl1            | 653   | 1.45 | 0.74 | NM_030004.2 |  |
| Car9             | 478   | 1.45 | 0.14 | NM_139305.1 |  |
| Polr3h           | 998   | 1.45 | 0.30 | NM_030229.2 |  |
| LOC230983        | 448   | 1.45 | 0.23 | XM_131847.2 |  |
| Eif3s5           | 10476 | 1.45 | 0.30 | NM_025344   |  |
| 2010007K12Rik    | 496   | 1.45 | 0.67 | AK008150    |  |
| Ebp              | 784   | 1.45 | 0.33 | NM_007898.2 |  |
| scl00009.1_36_RE | 71    | 1.45 | 0.46 |             |  |
| Srrm2            | 652   | 1.45 | 0.07 | NM_175229.2 |  |
| Blvra            | 2362  | 1.45 | 0.08 | NM_026678.3 |  |
| LOC381490        | 6761  | 1.45 | 0.35 | XM_355443.1 |  |
| F730029J03Rik    | 70    | 1.45 | 0.57 | AK089440    |  |
| 1700021P04Rik    | 44    | 1.45 | 0.53 | XM_129158.1 |  |
| BC037704         | 121   | 1.45 | 0.58 |             |  |
| 1110007F05Rik    | 312   | 1.45 | 0.40 | XM_284024.2 |  |
| scl0004025.1_69  | 205   | 1.45 | 0.19 |             |  |
| A230057E24Rik    | 193   | 1.45 | 0.27 | AK038724    |  |
| Sh3glb2          | 2195  | 1.45 | 0.19 | NM_139302.1 |  |
| LOC245892        | 6175  | 1.45 | 0.30 | XM_147335.2 |  |
| Cdc42ep2         | 86    | 1.45 | 0.40 | NM_026772.1 |  |
| Slc2a6           | 629   | 1.45 | 0.22 | NM_172659.1 |  |
| Rap2b            | 52    | 1.45 | 0.42 | NM_028712.3 |  |
| Phf19            | 344   | 1.45 | 0.36 | NM_028716.1 |  |
| Keap1            | 560   | 1.45 | 0.03 | NM_016679.2 |  |
| 2810021O14Rik    | 2038  | 1.45 | 0.31 | AK076679    |  |
| 4930515G01Rik    | 73    | 1.45 | 0.38 | NM_175120.2 |  |
| Rpl5             | 22877 | 1.45 | 0.16 | NM_016980.1 |  |
| Birc5            | 2345  | 1.45 | 0.39 | NM_009689.1 |  |
| Tapbpl           | 112   | 1.45 | 0.63 |             |  |
| Scamp2           | 2220  | 1.45 | 0.09 | NM_022813.2 |  |
| MGC40669         | 111   | 1.45 | 0.50 | XM_133786.5 |  |
| Mlit4            | 952   | 1.45 | 0.66 | XM_139743   |  |
| Emp1             | 529   | 1.45 | 0.20 | NM_010128.3 |  |
| Dynll1           | 6442  | 1.45 | 0.37 |             |  |
| 2010204O13Rik    | 108   | 1.45 | 0.70 |             |  |
| EG630499         | 735   | 1.45 | 0.33 |             |  |
| Per1             | 653   | 1.45 | 0.22 | NM_011065.2 |  |
| Itgb1bp1         | 1197  | 1.45 | 0.14 | NM_008403.2 |  |
| Arrdc4           | 2534  | 1.45 | 0.55 | NM_025549.1 |  |
| Gtse1            | 970   | 1.45 | 0.32 | NM_013882.1 |  |
| Nipsnap1         | 997   | 1.44 | 0.25 | NM_008698.1 |  |
| Gabarap          | 3765  | 1.44 | 0.42 | NM_019749.3 |  |
| Tbc1d7           | 1001  | 1.44 | 0.44 | NM_025935.1 |  |
| Commd3           | 2542  | 1.44 | 0.51 |             |  |
| 1700022C21Rik    | 403   | 1.44 | 0.07 | NM_029602.1 |  |
| Syp              | 3021  | 1.44 | 0.71 | NM_009305.1 |  |
| BC005624         | 139   | 1.44 | 0.32 | NM_144885.1 |  |
| Snx11            | 1818  | 1.44 | 0.04 | NM_028965.2 |  |
| Acot8            | 895   | 1.44 | 0.25 |             |  |
| 2510010F15Rik    | 1098  | 1.44 | 0.18 | NM_026454.2 |  |
| Calr             | 859   | 1.44 | 0.94 | NM_007591.2 |  |
| C230078J11Rik    | 89    | 1.44 | 0.40 | AK048878    |  |
| LOC732482        | 417   | 1.44 | 0.54 |             |  |
| Creb3            | 1884  | 1.44 | 0.18 | NM_013497.1 |  |

|               |       |      |      |             |  |
|---------------|-------|------|------|-------------|--|
| Thap11        | 2033  | 1.44 | 0.09 | NM_021513.1 |  |
| LOC382628     | 142   | 1.44 | 0.57 | XM_356597.1 |  |
| Ckap1         | 3967  | 1.44 | 0.43 | NM_025548.1 |  |
| Mrpl15        | 2349  | 1.44 | 0.50 | AK003367    |  |
| Bcap31        | 1272  | 1.44 | 0.40 | NM_012060.2 |  |
| Asl           | 333   | 1.44 | 0.13 | NM_133768.1 |  |
| 3110013H01Rik | 4852  | 1.44 | 0.58 | XM_203393.1 |  |
| Exosc8        | 1014  | 1.44 | 0.19 | NM_027148.2 |  |
| Ppp4c         | 7075  | 1.44 | 0.30 | NM_019674.2 |  |
| Ppm1l         | 679   | 1.44 | 0.11 | NM_178726   |  |
| Syt5          | 494   | 1.44 | 0.73 | NM_016908.2 |  |
| Vps28         | 11121 | 1.44 | 0.41 | NM_025842.1 |  |
| Tuba8         | 290   | 1.44 | 0.30 | NM_017379.1 |  |
| Tspan17       | 1775  | 1.44 | 0.29 |             |  |
| 4930565B19Rik | 139   | 1.44 | 0.32 |             |  |
| Sat1          | 6713  | 1.44 | 0.56 | NM_009121.3 |  |
| Sar1b         | 3831  | 1.44 | 0.24 |             |  |
| Actb          | 10552 | 1.44 | 0.09 | NM_007393.1 |  |
| Mta2          | 552   | 1.44 | 0.31 | NM_016664.1 |  |
| Btf3          | 19808 | 1.44 | 0.43 | NM_145455.1 |  |
| Lemd2         | 4017  | 1.44 | 0.20 | NM_146075.1 |  |
| Tufm          | 5319  | 1.44 | 0.41 | NM_172745.1 |  |
| Prkcabp       | 1567  | 1.44 | 0.20 | NM_008837.1 |  |
| Aabp3-pending | 488   | 1.44 | 0.41 | AK014712    |  |
| Naca          | 6012  | 1.44 | 0.34 | NM_013608.2 |  |
| 2010001O09Rik | 1334  | 1.44 | 0.37 | NM_025909.1 |  |
| Vat1          | 709   | 1.44 | 0.51 | NM_012037.1 |  |
| Sdhb          | 1792  | 1.44 | 0.37 | NM_023374.3 |  |
| Stk19         | 411   | 1.44 | 0.60 | NM_019442   |  |
| Nhlrc1        | 461   | 1.44 | 0.13 | NM_175340.2 |  |
| Stub1         | 1380  | 1.44 | 0.48 | NM_019719.2 |  |
| Srm           | 4586  | 1.44 | 0.32 | NM_009272.2 |  |
| Pcdhgb1       | 226   | 1.44 | 0.37 | NM_033574   |  |
| 9130204C11Rik | 82    | 1.44 | 0.35 | AK033633    |  |
| 2900073H19Rik | 437   | 1.44 | 0.19 | NM_026615.2 |  |
| A230051G13Rik | 498   | 1.44 | 0.08 | NM_173785.2 |  |
| Tsga2         | 2979  | 1.44 | 0.17 | NM_025290.2 |  |
| Akt1s1        | 1604  | 1.44 | 0.68 | NM_026270.1 |  |
| Dscr2         | 2298  | 1.44 | 0.47 | NM_019537.1 |  |
| Arf5          | 2015  | 1.44 | 0.79 | NM_007480.1 |  |
| Mrps31        | 2375  | 1.44 | 0.23 | NM_020560.1 |  |
| Cog8          | 1157  | 1.44 | 0.15 | NM_139229.2 |  |
| 1110028N05Rik | 415   | 1.44 | 0.66 | NM_025400.2 |  |
| 2810049C16Rik | 316   | 1.44 | 0.41 | AK012928    |  |
| Atp5c1        | 10995 | 1.44 | 0.14 | NM_020615.2 |  |
| 9830166G06Rik | 1092  | 1.44 | 0.18 | AK036717    |  |
| BC023823      | 2589  | 1.44 | 0.39 | NM_153566.1 |  |
| Aamp          | 4347  | 1.44 | 0.47 | NM_146110.1 |  |
| Sas           | 1655  | 1.44 | 0.34 | NM_025982   |  |
| Gnefr         | 641   | 1.44 | 0.24 |             |  |
| Mrps10        | 971   | 1.44 | 0.41 | NM_183086   |  |
| 4833424P18Rik | 428   | 1.44 | 0.49 | AK014764    |  |
| Ctxn          | 583   | 1.44 | 1.03 | NM_183315.1 |  |
| 4930526I15Rik | 536   | 1.44 | 0.69 |             |  |
| Bet1l         | 1736  | 1.44 | 0.49 | NM_018742.3 |  |
| A430024H01Rik | 238   | 1.44 | 0.30 | AK020747    |  |
| Dhrs7         | 1437  | 1.44 | 0.35 | NM_025522.1 |  |
| Cox10         | 2836  | 1.44 | 0.34 | NM_178379.2 |  |
| Fez1          | 1050  | 1.44 | 0.25 | NM_183171.1 |  |
| LOC386564     | 2260  | 1.44 | 0.65 | XM_359405.1 |  |
| Phlda3        | 1195  | 1.44 | 0.23 | NM_013750.1 |  |
| Tagln2        | 7805  | 1.44 | 0.44 | NM_178598.1 |  |
| C330013E15Rik | 150   | 1.44 | 0.37 |             |  |
| A930017E24Rik | 894   | 1.44 | 0.51 | NM_177041.2 |  |
| Sema4b        | 1096  | 1.44 | 0.17 | AK028896    |  |
| 1300017J02Rik | 41    | 1.43 | 1.22 | NM_027918.1 |  |
| Mphosph6      | 1438  | 1.43 | 0.48 | NM_026758.1 |  |
| Bok           | 997   | 1.43 | 0.15 | NM_016778   |  |

|                |       |      |      |             |  |
|----------------|-------|------|------|-------------|--|
| Slc25a38       | 1296  | 1.43 | 0.24 |             |  |
| 1190004M23Rik  | 339   | 1.43 | 0.36 |             |  |
| Cml1           | 268   | 1.43 | 0.21 | NM_023160.1 |  |
| 1110002N22Rik  | 827   | 1.43 | 0.36 | NM_183275.1 |  |
| 2210018M03Rik  | 1745  | 1.43 | 0.22 | XM_355849.1 |  |
| Pmm1           | 831   | 1.43 | 0.44 | NM_013872.1 |  |
| Rfxap          | 810   | 1.43 | 0.39 | NM_133231   |  |
| 4933429H19Rik  | 43    | 1.43 | 0.43 | AK016981    |  |
| Copz2          | 409   | 1.43 | 0.47 | NM_019877.1 |  |
| G630024G08Rik  | 132   | 1.43 | 0.48 | AK090243    |  |
| H2-Q2          | 644   | 1.43 | 0.39 | NM_010392.1 |  |
| Hoxa7          | 279   | 1.43 | 0.06 | NM_010455   |  |
| Hdc            | 301   | 1.43 | 0.14 | NM_008230   |  |
| Mrpl49         | 715   | 1.43 | 0.18 | NM_026246.1 |  |
| 2510027N19Rik  | 4131  | 1.43 | 0.33 | NM_026330.2 |  |
| Psm10          | 2394  | 1.43 | 0.34 | NM_016883.3 |  |
| Armc6          | 658   | 1.43 | 0.28 | XM_486122   |  |
| Gpr137         | 1084  | 1.43 | 0.27 |             |  |
| 1300011L04Rik  | 102   | 1.43 | 0.44 |             |  |
| Pabpn1         | 6954  | 1.43 | 0.62 | NM_019402.1 |  |
| Cklfs3         | 105   | 1.43 | 0.10 | NM_024217.2 |  |
| LOC385068      | 11685 | 1.43 | 0.22 | XM_358030.1 |  |
| Cdk2ap1        | 21855 | 1.43 | 0.29 | NM_013812.1 |  |
| 1700071K01Rik  | 271   | 1.43 | 0.07 |             |  |
| Rhbdd2         | 183   | 1.43 | 0.37 |             |  |
| Pkig           | 1271  | 1.43 | 0.22 | NM_011106.1 |  |
| Mrpl36         | 2578  | 1.43 | 0.30 | NM_053163.1 |  |
| Dbp            | 2530  | 1.43 | 0.27 | NM_016974.1 |  |
| Gstm2          | 2491  | 1.43 | 0.23 | NM_008183.2 |  |
| 4933424A20Rik  | 118   | 1.43 | 0.34 |             |  |
| Phca           | 729   | 1.43 | 0.28 | NM_025408.1 |  |
| Srr            | 3996  | 1.43 | 0.14 | AK043819    |  |
| Nuak1          | 110   | 1.43 | 0.63 |             |  |
| Wbscr18        | 609   | 1.43 | 0.32 | NM_025362.2 |  |
| 2310002F18Rik  | 159   | 1.43 | 0.63 | XM_132218.3 |  |
| Sertad1        | 248   | 1.43 | 0.16 | NM_018820.3 |  |
| Rai12          | 1661  | 1.43 | 0.23 | NM_018740.1 |  |
| Tnip1          | 451   | 1.43 | 0.80 | NM_021327.1 |  |
| Nudc           | 14531 | 1.43 | 0.37 | NM_010948.1 |  |
| Incenp         | 1179  | 1.43 | 0.30 | NM_016692.1 |  |
| Rps6kl1        | 1896  | 1.43 | 0.28 | NM_146244.2 |  |
| Hs3st6         | 56    | 1.43 | 0.66 |             |  |
| E2f1           | 5091  | 1.43 | 0.35 | NM_007891.1 |  |
| 3110023E09Rik  | 396   | 1.43 | 0.30 | NM_026522.2 |  |
| Ndufa9         | 6908  | 1.43 | 0.49 | NM_025358.1 |  |
| Bud31          | 3644  | 1.43 | 0.28 |             |  |
| 3110023B02Rik  | 829   | 1.43 | 0.18 | NM_152807.1 |  |
| Eif2b4         | 3346  | 1.43 | 0.33 | NM_010122.1 |  |
| Hspb6          | 7730  | 1.43 | 0.25 |             |  |
| D230016O17     | 156   | 1.43 | 0.23 |             |  |
| Nupr1          | 4023  | 1.43 | 0.39 | NM_019738.1 |  |
| C430049K18Rik  | 290   | 1.43 | 0.52 | AK082937    |  |
| 3110001N18Rik  | 307   | 1.43 | 0.56 | NM_026517.1 |  |
| LOC381850      | 825   | 1.43 | 0.58 | XM_355862.1 |  |
| Anxa2          | 18814 | 1.43 | 0.14 | NM_007585.2 |  |
| G1p2           | 50    | 1.43 | 0.47 | NM_015783.1 |  |
| 9630032J03Rik  | 500   | 1.43 | 0.33 | AK079342    |  |
| Vsnl1          | 79    | 1.43 | 0.84 | NM_012038.2 |  |
| 1810015A11Rik  | 1282  | 1.43 | 0.57 | XM_358772.1 |  |
| 3732412D22Rik  | 888   | 1.42 | 0.12 | XM_194207.3 |  |
| D230021F18Rik  | 215   | 1.42 | 0.33 | AK051938    |  |
| LOC382230      | 13841 | 1.42 | 0.28 | XM_356342.1 |  |
| N6amt1         | 1650  | 1.42 | 0.41 |             |  |
| Gna-rs1        | 2397  | 1.42 | 0.14 | NM_008136.1 |  |
| Map4k1         | 39    | 1.42 | 0.76 | NM_008279.1 |  |
| Fer1l3         | 53    | 1.42 | 0.14 | XM_283556.2 |  |
| scl0003020.1_1 | 61    | 1.42 | 0.61 |             |  |
| E430033B07Rik  | 22942 | 1.42 | 0.23 | AK088947    |  |

|               |       |      |      |             |  |
|---------------|-------|------|------|-------------|--|
| Dgat2         | 774   | 1.42 | 0.23 | NM_026384.2 |  |
| Rnaseh1       | 481   | 1.42 | 0.33 | NM_011275.1 |  |
| 2810438F06Rik | 1348  | 1.42 | 0.63 |             |  |
| Ptdsr         | 8547  | 1.42 | 0.07 | NM_033398.1 |  |
| 2900075A18Rik | 10214 | 1.42 | 0.46 |             |  |
| Rad1          | 565   | 1.42 | 0.31 | NM_011232.1 |  |
| Vax2          | 53    | 1.42 | 0.24 | NM_011912.1 |  |
| Pla2g2c       | 72    | 1.42 | 0.57 | NM_008868.1 |  |
| Lym2          | 918   | 1.42 | 0.37 |             |  |
| Pigs          | 275   | 1.42 | 0.41 | NM_201406.1 |  |
| LOC545056     | 8413  | 1.42 | 0.10 |             |  |
| 2600005N12Rik | 806   | 1.42 | 0.32 | NM_197995.1 |  |
| Smpdl3b       | 541   | 1.42 | 0.32 | NM_133888.1 |  |
| Calm3         | 8608  | 1.42 | 0.09 | NM_007590.2 |  |
| Rab8a         | 2963  | 1.42 | 0.11 | NM_023126.2 |  |
| Cyp2s1        | 375   | 1.42 | 0.62 | NM_028775.2 |  |
| Atp1a1        | 8737  | 1.42 | 0.16 | NM_144900.1 |  |
| Ankrd47       | 66    | 1.42 | 0.18 |             |  |
| LOC382114     | 175   | 1.42 | 0.42 | XM_358707.1 |  |
| 1110017L21Rik | 3414  | 1.42 | 0.18 | AK003755    |  |
| LOC382691     | 458   | 1.42 | 0.28 | XM_356627.1 |  |
| Gfm           | 305   | 1.42 | 0.37 | NM_138591.1 |  |
| B3Gat3        | 79    | 1.42 | 0.58 | AK048428    |  |
| 1110004P15Rik | 571   | 1.42 | 0.32 |             |  |
| Srr1          | 165   | 1.42 | 0.55 | XM_485670   |  |
| BC024955      | 457   | 1.42 | 0.45 | NM_201352.1 |  |
| Impdh1        | 265   | 1.42 | 0.42 | NM_011829.2 |  |
| Nr1i3         | 359   | 1.42 | 0.48 | AK029485    |  |
| 1700008F19Rik | 76    | 1.42 | 0.19 |             |  |
| Ddx49         | 725   | 1.42 | 0.21 |             |  |
| 2500002L14Rik | 3414  | 1.42 | 0.22 | NM_025607.2 |  |
| Dtr           | 335   | 1.42 | 0.28 | NM_010415.1 |  |
| Tuba4         | 155   | 1.42 | 0.21 | NM_009447.2 |  |
| Paqr4         | 91    | 1.42 | 0.63 | NM_023824.2 |  |
| BC018399      | 43    | 1.42 | 0.45 | NM_145431.1 |  |
| Gstp1         | 10514 | 1.42 | 0.50 | NM_013541   |  |
| Rbm21         | 1844  | 1.42 | 0.17 | NM_197993.1 |  |
| Fpgs          | 651   | 1.42 | 0.15 | NM_010236   |  |
| Gsto2         | 108   | 1.42 | 0.11 |             |  |
| Ddx27         | 2144  | 1.42 | 0.38 | NM_153065   |  |
| H47           | 3527  | 1.42 | 0.59 | NM_024439.2 |  |
| Slc35c2       | 806   | 1.42 | 0.35 | NM_144893.1 |  |
| Mageh1        | 187   | 1.42 | 0.08 | NM_023788.1 |  |
| Fibp          | 684   | 1.42 | 0.24 | NM_021438.1 |  |
| LOC381739     | 125   | 1.42 | 0.18 | XM_358649.1 |  |
| Chst11        | 95    | 1.42 | 0.08 | NM_021439.1 |  |
| Tsta3         | 4970  | 1.42 | 0.11 | NM_031201.1 |  |
| Ercc1         | 360   | 1.42 | 0.52 | NM_007948.1 |  |
| Fgf15         | 52    | 1.42 | 0.71 | NM_008003   |  |
| LOC380920     | 118   | 1.42 | 0.49 | XM_358464.1 |  |
| Gcap26        | 669   | 1.42 | 0.37 |             |  |
| Htf9c         | 2718  | 1.42 | 0.16 | NM_008307.1 |  |
| Ebi3          | 59    | 1.42 | 0.48 | NM_015766.1 |  |
| Rbx1          | 6823  | 1.42 | 0.24 | NM_019712.2 |  |
| Pbx4          | 196   | 1.41 | 0.50 | NM_030555.1 |  |
| A1132487      | 149   | 1.41 | 0.39 | XM_127129.3 |  |
| 1700029J07Rik | 195   | 1.41 | 0.31 | XM_134156.2 |  |
| Tmem134       | 717   | 1.41 | 0.36 |             |  |
| Cdca3         | 2399  | 1.41 | 0.26 | NM_013538.3 |  |
| E030040G24Rik | 149   | 1.41 | 0.48 | AK087259    |  |
| Pafah1b3      | 1828  | 1.41 | 0.72 | NM_008776.1 |  |
| Fndc5         | 317   | 1.41 | 0.43 | NM_027402   |  |
| Ran           | 12332 | 1.41 | 0.15 | NM_009391.2 |  |
| Gtf2h1        | 2380  | 1.41 | 0.07 | NM_008186.2 |  |
| Myak          | 160   | 1.41 | 0.45 | AF071071    |  |
| 1110014J17Rik | 2650  | 1.41 | 0.36 | AK003702    |  |
| Gng8          | 127   | 1.41 | 0.44 | NM_010320.2 |  |
| S100pbb       | 124   | 1.41 | 0.47 |             |  |

|               |       |      |      |             |  |
|---------------|-------|------|------|-------------|--|
| Nat6          | 114   | 1.41 | 0.96 | NM_019750.2 |  |
| Gsto1         | 1731  | 1.41 | 0.29 | NM_010362.1 |  |
| Qtrt1         | 1114  | 1.41 | 0.53 | NM_021888.1 |  |
| 2610027L16Rik | 140   | 1.41 | 0.11 | NM_026403.2 |  |
| 2410016O06Rik | 1257  | 1.41 | 0.07 | NM_023633   |  |
| Cdkn2d        | 502   | 1.41 | 0.51 | NM_009878   |  |
| Rnf135        | 373   | 1.41 | 0.18 |             |  |
| 1810058I24Rik | 200   | 1.41 | 0.24 |             |  |
| Alox12b       | 67    | 1.41 | 0.54 | NM_009659.1 |  |
| 1700095J19Rik | 84    | 1.41 | 0.44 | AK007085    |  |
| BC035522      | 416   | 1.41 | 0.29 | XM_355513.1 |  |
| 6430598A04Rik | 165   | 1.41 | 0.46 | NM_175521.3 |  |
| Grhpr         | 2162  | 1.41 | 0.07 | NM_080289.1 |  |
| Mrps35        | 895   | 1.41 | 0.91 | NM_145573   |  |
| 4632413K17Rik | 1061  | 1.41 | 0.34 | NM_177614.2 |  |
| 1700030E05Rik | 509   | 1.41 | 0.34 | NM_023790.1 |  |
| 1110012O05Rik | 7992  | 1.41 | 0.20 | NM_024170   |  |
| A930007B11Rik | 108   | 1.41 | 0.53 |             |  |
| Mtf1          | 191   | 1.41 | 0.17 | NM_008636.2 |  |
| 5830471E12Rik | 647   | 1.41 | 0.73 |             |  |
| Al413631      | 282   | 1.41 | 0.12 | NM_198645   |  |
| Rpl23         | 20919 | 1.41 | 0.08 | NM_022891.1 |  |
| 9130005N14Rik | 326   | 1.41 | 0.29 | NM_026667.2 |  |
| Rhox4b        | 361   | 1.41 | 0.52 |             |  |
| LOC268700     | 8818  | 1.41 | 0.22 | XM_193742.2 |  |
| 4933436C20Rik | 230   | 1.41 | 0.43 | XM_486143   |  |
| Adm2          | 433   | 1.41 | 1.00 | NM_182928.2 |  |
| LOC232400     | 964   | 1.41 | 0.27 | XM_132895.3 |  |
| 2510004L01Rik | 386   | 1.41 | 0.43 | NM_021384.2 |  |
| 5930416I19Rik | 3720  | 1.41 | 0.20 | NM_197981.1 |  |
| Tagln3        | 1143  | 1.41 | 0.55 | NM_019754.2 |  |
| Upf1          | 883   | 1.41 | 0.20 |             |  |
| Ptms          | 460   | 1.41 | 0.92 |             |  |
| Cox7a2        | 281   | 1.41 | 0.20 | NM_009945.2 |  |
| Lbp           | 304   | 1.41 | 0.50 | NM_008489   |  |
| 2700063A19Rik | 76    | 1.41 | 0.77 | NM_197996   |  |
| Gzmm          | 314   | 1.41 | 0.12 | NM_008504.2 |  |
| Dhodh         | 245   | 1.41 | 0.24 | NM_020046   |  |
| D630035N04Rik | 171   | 1.41 | 1.04 | AK085505    |  |
| Zxda          | 337   | 1.41 | 0.44 | NM_183105.1 |  |
| Lcmt1         | 736   | 1.41 | 0.22 | NM_025304.3 |  |
| Sfrs16        | 288   | 1.41 | 0.27 | NM_016680   |  |
| Dnttip1       | 8743  | 1.41 | 0.23 | NM_133763.1 |  |
| Eif3s7        | 9586  | 1.41 | 0.13 | NM_018749   |  |
| Paf53         | 1022  | 1.41 | 0.25 | NM_022811   |  |
| LOC211591     | 41    | 1.41 | 0.68 | XM_147649.1 |  |
| 2310056P07Rik | 10576 | 1.41 | 0.52 | XM_148611.1 |  |
| 0610007C21Rik | 4959  | 1.41 | 0.33 | NM_212470   |  |
| Twistnb       | 812   | 1.41 | 0.26 | NM_172253.1 |  |
| Ubl7          | 907   | 1.41 | 0.72 |             |  |
| Mpst          | 41    | 1.41 | 0.56 | NM_138670.1 |  |
| Pqlc2         | 281   | 1.41 | 0.14 | NM_145384   |  |
| D11Moh34      | 760   | 1.41 | 0.47 | NM_033568.1 |  |
| D730042P09Rik | 84    | 1.41 | 0.07 | AK021335    |  |
| 5430432M24Rik | 340   | 1.41 | 0.54 | NM_028666.1 |  |
| 1500015A07Rik | 127   | 1.41 | 0.15 |             |  |
| LOC231444     | 263   | 1.41 | 0.22 | XM_124565.3 |  |
| Hdgf          | 6781  | 1.41 | 0.24 | NM_008231.2 |  |
| BC037034      | 2144  | 1.40 | 0.15 | NM_153161.1 |  |
| 1810055G02Rik | 1499  | 1.40 | 0.49 | NM_028077.1 |  |
| Ak1           | 869   | 1.40 | 0.13 | NM_021515.1 |  |
| Lepre1        | 271   | 1.40 | 0.07 | NM_019782.1 |  |
| 5430437P03Rik | 1515  | 1.40 | 0.61 | NM_026636   |  |
| Alg3          | 1287  | 1.40 | 0.48 | NM_145939   |  |
| Cdkn1a        | 6791  | 1.40 | 0.37 | NM_007669.2 |  |
| Lrba          | 580   | 1.40 | 0.16 | AK085208    |  |
| Rnf40         | 462   | 1.40 | 0.25 | NM_172281.1 |  |
| 0610034P02Rik | 746   | 1.40 | 0.36 | XM_203352.2 |  |

|               |      |      |      |             |  |
|---------------|------|------|------|-------------|--|
| LOC386534     | 192  | 1.40 | 0.17 | XM_359377.1 |  |
| LOC233899     | 288  | 1.40 | 0.12 | XM_133853.3 |  |
| Zfp535        | 508  | 1.40 | 0.08 | NM_026107.2 |  |
| Rpo1-1        | 2841 | 1.40 | 0.26 | NM_009085.1 |  |
| Cdipt         | 2684 | 1.40 | 0.17 | NM_138754.1 |  |
| Spc18         | 6725 | 1.40 | 0.30 | NM_019951.1 |  |
| 2310041H06Rik | 4538 | 1.40 | 0.30 | NM_029385.1 |  |
| Crebl1        | 1472 | 1.40 | 0.23 | NM_017406.2 |  |
| LOC381196     | 125  | 1.40 | 0.24 | XM_355126.1 |  |
| Hnrpl         | 7767 | 1.40 | 0.82 | NM_177301.3 |  |
| lfrd1         | 250  | 1.40 | 0.66 | NM_013562   |  |
| Sdcbp2        | 942  | 1.40 | 0.04 | NM_145535.1 |  |
| Plk1          | 2374 | 1.40 | 0.20 | NM_011121.2 |  |
| C730026E21Rik | 811  | 1.40 | 0.19 | NM_175439.2 |  |
| Clstn1        | 358  | 1.40 | 0.13 | NM_023051   |  |
| Syng2         | 1615 | 1.40 | 0.32 | NM_009304.1 |  |
| Mtap7d2       | 199  | 1.40 | 0.69 |             |  |
| Homer2        | 568  | 1.40 | 0.23 | XM_133550.4 |  |
| DXBwg1396e    | 265  | 1.40 | 0.45 | NM_029836.1 |  |
| 2700049H19Rik | 479  | 1.40 | 0.08 |             |  |
| 1190009E12Rik | 59   | 1.40 | 0.67 | AK004524    |  |
| A930029N17Rik | 59   | 1.40 | 0.87 | AK044651    |  |
| 1700026L06Rik | 121  | 1.40 | 0.51 | XM_130129.3 |  |
| 1500006O09Rik | 5236 | 1.40 | 0.33 | XM_147163.1 |  |
| Khdrbs2       | 458  | 1.40 | 0.18 | NM_133235.2 |  |
| BC009118      | 721  | 1.40 | 0.42 | NM_145595.1 |  |
| Ppof2         | 52   | 1.40 | 0.32 | NM_011148.2 |  |
| Ahsa1         | 1341 | 1.40 | 0.61 | NM_146036.1 |  |
| Tyms          | 968  | 1.40 | 0.43 | NM_021288.2 |  |
| Gpr177        | 141  | 1.40 | 0.23 |             |  |
| Cirbp         | 533  | 1.40 | 0.44 | NM_007705.1 |  |
| 0610007P06Rik | 2680 | 1.40 | 0.39 |             |  |
| 4930579G24Rik | 296  | 1.40 | 0.57 | XM_485257   |  |
| Amica1        | 41   | 1.40 | 0.35 |             |  |
| 3110043J09Rik | 121  | 1.40 | 0.04 | NM_028455   |  |
| Cib2          | 387  | 1.40 | 0.29 | NM_019686.3 |  |
| 4932425I24Rik | 283  | 1.40 | 0.24 | NM_177104.1 |  |
| 2810409H07Rik | 777  | 1.40 | 0.51 | NM_025942.1 |  |
| 1700014P03Rik | 91   | 1.40 | 0.23 | NM_153527.2 |  |
| LOC328832     | 52   | 1.40 | 0.87 | XM_283454.2 |  |
| Psm3          | 7708 | 1.40 | 0.24 | NM_011184.2 |  |
| Pramel3       | 44   | 1.40 | 0.44 | NM_031390.1 |  |
| 9430029K10Rik | 3495 | 1.40 | 0.54 | XM_284281.2 |  |
| Ube2m         | 721  | 1.40 | 0.58 | NM_145578.1 |  |
| Spin2         | 254  | 1.40 | 0.21 |             |  |
| Ndufs3        | 4067 | 1.40 | 0.37 | XM_130347.1 |  |
| 5730449L18Rik | 3273 | 1.40 | 0.27 | NM_025677.1 |  |
| Paox          | 830  | 1.40 | 0.20 | NM_153783.2 |  |
| 9530025L16Rik | 37   | 1.40 | 0.68 | NM_175256.2 |  |
| A230050A16Rik | 51   | 1.40 | 0.98 | AK038607    |  |
| C430015A10Rik | 358  | 1.40 | 0.10 | AK082906    |  |
| Cdkn2a        | 141  | 1.40 | 0.09 | NM_009877.1 |  |
| 8430432M10Rik | 160  | 1.40 | 0.14 | NM_176831.2 |  |
| 5033414D02Rik | 1826 | 1.40 | 0.45 | NM_026362.1 |  |
| Khsrp         | 136  | 1.40 | 0.31 | NM_010613   |  |
| Ddit4         | 5706 | 1.40 | 0.35 | NM_029083.1 |  |
| Acbd4         | 150  | 1.40 | 0.60 | NM_025988.1 |  |
| BC048355      | 146  | 1.40 | 0.57 | NM_207161   |  |
| 5730409K12Rik | 728  | 1.40 | 0.38 |             |  |
| 4921509E05Rik | 51   | 1.40 | 0.64 | NR_000042.1 |  |
| 5033430I15Rik | 728  | 1.40 | 0.44 | XM_127301.2 |  |
| C730009F21Rik | 327  | 1.40 | 0.60 | AK050063    |  |
| 1110001N06Rik | 2114 | 1.40 | 0.42 | AK003256    |  |
| Surf1         | 365  | 1.39 | 0.47 | NM_013677.1 |  |
| 2510002D24Rik | 311  | 1.39 | 0.55 | XM_110173.1 |  |
| 6530413F01Rik | 62   | 1.39 | 0.70 | AK018335    |  |
| Ripk3         | 59   | 1.39 | 0.22 | NM_019955.1 |  |
| Hist1h2bp     | 162  | 1.39 | 0.29 | NM_178202   |  |



|                |       |      |      |             |  |
|----------------|-------|------|------|-------------|--|
| 1700052K11Rik  | 152   | 1.39 | 0.31 | NM_028539.1 |  |
| 5031439G07Rik  | 954   | 1.39 | 0.22 | XM_128281   |  |
| Dusp3          | 143   | 1.39 | 0.21 | NM_028207.1 |  |
| Rpn1           | 74    | 1.39 | 0.33 | NM_133933.2 |  |
| mt-Atp6        | 26004 | 1.39 | 0.32 |             |  |
| H2-L           | 5685  | 1.39 | 0.41 |             |  |
| 2310040B03Rik  | 338   | 1.39 | 0.44 |             |  |
| AI839735       | 1882  | 1.39 | 0.33 | NM_178915.2 |  |
| 1700003F12Rik  | 200   | 1.39 | 0.17 |             |  |
| Agpat6         | 3952  | 1.39 | 0.18 |             |  |
| Timm17b        | 61    | 1.39 | 0.52 | NM_011591   |  |
| 1110001K21Rik  | 2289  | 1.39 | 0.53 | NM_025839.1 |  |
| Zfp67          | 67    | 1.39 | 0.38 | NM_009565.1 |  |
| Fhit           | 248   | 1.39 | 0.04 | NM_010210.1 |  |
| Guca1a         | 119   | 1.39 | 0.47 | NM_008189.2 |  |
| Kai1           | 496   | 1.39 | 0.18 | NM_007656.1 |  |
| Exosc2         | 1777  | 1.39 | 0.31 | NM_144886.1 |  |
| 3930402F13Rik  | 335   | 1.39 | 0.29 | XM_128477.4 |  |
| Comm4          | 813   | 1.39 | 0.34 | NM_025417.1 |  |
| Cycs           | 2255  | 1.39 | 0.23 | NM_007808.2 |  |
| IGHV1S123_AF02 | 43    | 1.39 | 0.54 |             |  |
| Pla2g12a       | 2475  | 1.39 | 0.18 | NM_023196.2 |  |
| BC018462       | 174   | 1.39 | 0.32 | NM_146178   |  |
| Glis1          | 241   | 1.39 | 0.53 | NM_147221.1 |  |
| A630050L08Rik  | 60    | 1.39 | 0.98 | AK041985    |  |
| Olfr1381       | 58    | 1.39 | 0.16 |             |  |
| Golga2         | 350   | 1.39 | 0.19 | NM_133852.1 |  |
| Vamp3          | 3064  | 1.39 | 0.03 | NM_009498.3 |  |
| 1110012L19Rik  | 689   | 1.39 | 0.56 | NM_026787.1 |  |
| Sdc3           | 2066  | 1.39 | 0.25 | NM_011520.2 |  |
| Slc12a3        | 305   | 1.39 | 0.11 | NM_019415   |  |
| Tmem5          | 1431  | 1.39 | 0.27 | NM_153059   |  |
| Tacr2          | 44    | 1.39 | 0.29 | NM_009314.2 |  |
| Akr1b8         | 319   | 1.39 | 0.70 | NM_008012.1 |  |
| 2410001E19Rik  | 1315  | 1.39 | 0.24 | XM_134644.2 |  |
| Rangap1        | 7657  | 1.39 | 0.09 | NM_011241   |  |
| Tbrg4          | 634   | 1.39 | 0.08 | NM_134011.1 |  |
| E030045D18Rik  | 49    | 1.39 | 0.53 |             |  |
| Mrpl44         | 2129  | 1.39 | 0.34 | XM_357108.1 |  |
| LOC384054      | 78    | 1.39 | 0.76 | XM_357391.1 |  |
| Pih1d1         | 1946  | 1.39 | 0.46 |             |  |
| Angptl6        | 511   | 1.39 | 0.20 | NM_145154   |  |
| Gpaa1          | 350   | 1.39 | 0.36 | NM_010331.2 |  |
| Psm13          | 10149 | 1.39 | 0.20 | NM_011875.2 |  |
| LOC384104      | 1766  | 1.39 | 0.67 | XM_357429.1 |  |
| LOC381234      | 39    | 1.39 | 0.76 | XM_355170.1 |  |
| LOC383124      | 71    | 1.39 | 0.42 | XM_356889.1 |  |
| Coq7           | 371   | 1.39 | 0.01 | NM_009940.1 |  |
| Hist1h2bn      | 117   | 1.39 | 0.50 | NM_178201.1 |  |
| Ckmt2          | 59    | 1.39 | 0.54 | NM_198415.1 |  |
| Sui1-rs1       | 32693 | 1.39 | 0.15 | NM_011508   |  |
| Wbp5           | 18356 | 1.39 | 0.38 | NM_011712.1 |  |
| Bspry          | 253   | 1.39 | 0.34 | NM_138653.1 |  |
| H2-gs17        | 746   | 1.39 | 0.18 |             |  |
| LOC381792      | 140   | 1.39 | 0.56 | XM_358653.1 |  |
| Cldn9          | 577   | 1.39 | 0.16 | NM_020293.1 |  |
| Dctn6          | 1028  | 1.39 | 0.39 | NM_011722.1 |  |
| Prkcsh         | 4626  | 1.39 | 0.39 | AK046762    |  |
| 4933402L21Rik  | 284   | 1.39 | 0.32 | XM_203501.2 |  |
| Dyt1           | 442   | 1.39 | 0.11 | NM_144884.1 |  |
| Dbr1           | 1558  | 1.39 | 0.41 | NM_031403.1 |  |
| Crip2          | 16573 | 1.39 | 0.29 | NM_024223.1 |  |
| 1500002B03Rik  | 185   | 1.39 | 0.27 | XM_148033.2 |  |
| Rnaseh2a       | 505   | 1.39 | 0.37 | XM_356099   |  |
| Lrpap1         | 4261  | 1.39 | 0.16 | NM_013587.1 |  |
| Auh            | 46    | 1.39 | 0.62 | AK003929    |  |
| Sertad3        | 300   | 1.39 | 0.54 | NM_133210.2 |  |
| Gtpbp6         | 524   | 1.39 | 0.20 |             |  |

|                 |       |      |      |             |  |
|-----------------|-------|------|------|-------------|--|
| Grn             | 5141  | 1.39 | 0.54 | NM_008175.2 |  |
| Ndufaf1         | 2069  | 1.39 | 0.16 | NM_027175.2 |  |
| 2310067B10Rik   | 330   | 1.39 | 0.68 | NM_028014.2 |  |
| scl0002130.1_20 | 208   | 1.39 | 0.25 |             |  |
| 2700007B13Rik   | 250   | 1.38 | 0.40 | AK012211    |  |
| Pgd             | 3113  | 1.38 | 0.28 | NM_025801.1 |  |
| Bccip           | 2630  | 1.38 | 0.25 | NM_025392   |  |
| Myst1           | 873   | 1.38 | 0.28 | NM_026370.1 |  |
| Ttr             | 45    | 1.38 | 1.09 | NM_013697.1 |  |
| Dpagt1          | 1705  | 1.38 | 0.09 | NM_007875.2 |  |
| Gtgeo22         | 1109  | 1.38 | 0.43 | NM_148934.1 |  |
| Bcs1l           | 2105  | 1.38 | 0.26 | NM_025784.2 |  |
| Pqbp1           | 755   | 1.38 | 0.34 | NM_019478.2 |  |
| 1500001M20Rik   | 1069  | 1.38 | 0.26 | XM_132806   |  |
| E130012P04Rik   | 48    | 1.38 | 0.31 | AK053379    |  |
| Spag7           | 648   | 1.38 | 0.34 | NM_172561   |  |
| Neu3            | 75    | 1.38 | 0.11 | NM_016720.1 |  |
| Urod            | 6791  | 1.38 | 0.29 | NM_009478.1 |  |
| Cops6           | 6174  | 1.38 | 0.51 | NM_012002.1 |  |
| BC036718        | 1330  | 1.38 | 0.26 | NM_153136   |  |
| 2700082D03Rik   | 6143  | 1.38 | 0.35 | NM_026031.1 |  |
| Dolpp1          | 438   | 1.38 | 0.10 | NM_020329.1 |  |
| Usmg3           | 111   | 1.38 | 0.44 |             |  |
| Wbp1            | 609   | 1.38 | 0.53 | NM_016757.1 |  |
| A730050C11Rik   | 109   | 1.38 | 0.37 | AK043043    |  |
| Lypla3          | 682   | 1.38 | 0.16 | NM_133792.2 |  |
| 6330401K01Rik   | 81    | 1.38 | 0.19 | AK031803    |  |
| Atp5f1          | 1680  | 1.38 | 0.27 | AK081249    |  |
| Tpst2           | 1961  | 1.38 | 0.49 | NM_009419   |  |
| D7Erttd70e      | 46    | 1.38 | 0.17 | AK079628    |  |
| Hip2            | 3240  | 1.38 | 0.18 | NM_016786.2 |  |
| LOC277856       | 9140  | 1.38 | 0.31 | XM_204210.2 |  |
| LOC219049       | 5100  | 1.38 | 0.25 | XM_122711.2 |  |
| B930004C15Rik   | 734   | 1.38 | 0.31 | AK046928    |  |
| AW742319        | 12794 | 1.38 | 0.07 | NM_021345.1 |  |
| D730049H07Rik   | 541   | 1.38 | 0.40 | NM_175423   |  |
| scl0003886.1_50 | 332   | 1.38 | 0.15 |             |  |
| D11Wsu99e       | 253   | 1.38 | 0.19 | NM_138598.2 |  |
| Mpi1            | 611   | 1.38 | 0.22 | XM_134931.3 |  |
| Dusp14          | 116   | 1.38 | 0.18 | NM_019819.2 |  |
| Myadm           | 510   | 1.38 | 0.30 | NM_016969.1 |  |
| Cdc20           | 1732  | 1.38 | 0.05 | NM_023223.1 |  |
| Zyx             | 6153  | 1.38 | 0.28 | NM_011777.1 |  |
| F8a             | 2981  | 1.38 | 0.18 | NM_007978   |  |
| 4930471M23Rik   | 34    | 1.38 | 1.13 | NM_175675.1 |  |
| B430206N15Rik   | 241   | 1.38 | 0.29 | AK080913    |  |
| Pde6g           | 48    | 1.38 | 0.53 | NM_012065.2 |  |
| Myh10           | 950   | 1.38 | 0.22 | NM_175260   |  |
| Psmc4           | 4662  | 1.38 | 0.25 | NM_011874.1 |  |
| Rbp7            | 139   | 1.38 | 0.15 | NM_022020.1 |  |
| Spr             | 510   | 1.38 | 0.20 | NM_011467.1 |  |
| G630014P16Rik   | 91    | 1.38 | 0.37 | AK090191    |  |
| 1810009A15Rik   | 650   | 1.38 | 0.28 | NM_025463.1 |  |
| Atad3a          | 6602  | 1.38 | 0.21 | NM_179203.1 |  |
| 9629514_325     | 804   | 1.38 | 0.08 |             |  |
| A830008O07      | 53    | 1.38 | 0.19 | NM_177819.2 |  |
| 2600005C20Rik   | 1310  | 1.38 | 0.10 | NM_028244   |  |
| Acbd6           | 1503  | 1.38 | 0.48 | NM_028250.1 |  |
| Abcf1           | 1644  | 1.38 | 0.29 | NM_013854.1 |  |
| Cyp4f13         | 1093  | 1.38 | 0.22 | NM_130882.1 |  |
| C530044N13Rik   | 1457  | 1.38 | 0.22 | NM_146067   |  |
| D4Erttd22e      | 3160  | 1.38 | 0.11 | NM_174996.1 |  |
| E330015C15Rik   | 36    | 1.38 | 0.72 | AK054324    |  |
| 1700040I03Rik   | 217   | 1.38 | 0.25 | XM_132652.1 |  |
| 2310016A09Rik   | 960   | 1.38 | 0.16 | NM_181588.2 |  |
| Hyou1           | 528   | 1.38 | 0.36 | NM_021395.2 |  |
| Wdr4            | 175   | 1.38 | 0.14 | NM_021322.1 |  |
| Ttl             | 87    | 1.38 | 0.30 | NM_027192.1 |  |

|               |      |      |      |              |  |
|---------------|------|------|------|--------------|--|
| Preb          | 2129 | 1.38 | 0.23 | NM_016703    |  |
| 2310047H23Rik | 1680 | 1.38 | 0.11 | NM_175150    |  |
| LOC380665     | 660  | 1.38 | 0.11 | XM_354567.1  |  |
| Msx3          | 53   | 1.38 | 0.71 | AK012208     |  |
| 3100004P22Rik | 3496 | 1.38 | 0.55 | NM_133693.1  |  |
| Trim40        | 65   | 1.38 | 0.63 |              |  |
| Mrps27        | 386  | 1.38 | 0.25 | NM_173757.2  |  |
| Neu1          | 6251 | 1.38 | 0.13 | NM_010893    |  |
| Brf2          | 638  | 1.38 | 0.12 | NM_025686.1  |  |
| LOC382163     | 142  | 1.38 | 0.71 | XM_356263.1  |  |
| D930020N02Rik | 1531 | 1.38 | 0.09 | AK086317     |  |
| 9130604K18Rik | 55   | 1.38 | 0.73 | AK078977     |  |
| BC057893      | 190  | 1.38 | 0.28 | NM_173033.2  |  |
| A530072M07Rik | 1545 | 1.38 | 0.06 | AK041055     |  |
| Suclg1        | 4458 | 1.38 | 0.29 | NM_019879.1  |  |
| LOC384089     | 399  | 1.38 | 0.06 | XM_357413.1  |  |
| 1500026D16Rik | 220  | 1.38 | 0.10 | NM_026616.1  |  |
| LOC384742     | 571  | 1.38 | 0.77 | XM_357835.1  |  |
| Psmc5         | 4164 | 1.38 | 0.17 | NM_008950.1  |  |
| 1700010A17Rik | 154  | 1.38 | 0.64 | XM_130188.3  |  |
| Anapc7        | 1519 | 1.38 | 0.16 |              |  |
| Ube2v1        | 601  | 1.38 | 0.66 | NM_023230.1  |  |
| Olf1020       | 60   | 1.38 | 0.43 | NM_146580.1  |  |
| Oprs1         | 810  | 1.38 | 0.21 | NM_011014.1  |  |
| Zfp428        | 145  | 1.38 | 0.30 |              |  |
| Ruvbl1        | 1430 | 1.37 | 0.32 | NM_019685.1  |  |
| 3110001H15Rik | 1019 | 1.37 | 0.31 | NM_027355.1  |  |
| Serinc3       | 2290 | 1.37 | 0.14 |              |  |
| LOC381801     | 52   | 1.37 | 0.99 | XM_355803.1  |  |
| 1110020A09Rik | 1017 | 1.37 | 0.12 | NM_027415.1  |  |
| Slc9a1        | 1753 | 1.37 | 0.48 | NM_016981    |  |
| Plk2          | 211  | 1.37 | 0.44 | NM_152804.1  |  |
| Pgbpl1        | 903  | 1.37 | 0.53 | NM_145147    |  |
| Ptges         | 50   | 1.37 | 0.26 | NM_022415.2  |  |
| 2810439N09Rik | 33   | 1.37 | 1.10 |              |  |
| 4930488F09Rik | 38   | 1.37 | 0.71 | AK015645     |  |
| Rga           | 889  | 1.37 | 0.25 | NM_009057.1  |  |
| Sirt3         | 1458 | 1.37 | 0.32 | NM_022433.1  |  |
| LOC381379     | 782  | 1.37 | 0.35 | XM_355343.1  |  |
| 2610318N02Rik | 130  | 1.37 | 0.20 | NM_183287.1  |  |
| Nrbf1         | 1262 | 1.37 | 0.37 | NM_025297.1  |  |
| Mrpl24        | 1834 | 1.37 | 0.36 | NM_026591.1  |  |
| H2-K1         | 1129 | 1.37 | 0.14 | NM_001001892 |  |
| 5730577G12Rik | 347  | 1.37 | 0.16 | AK030766     |  |
| Mrps30        | 4512 | 1.37 | 0.23 | NM_021556.2  |  |
| Psm4          | 5418 | 1.37 | 0.32 | NM_011966    |  |
| 2610042O14Rik | 144  | 1.37 | 0.21 | NM_025575.1  |  |
| Soat2         | 178  | 1.37 | 0.18 | NM_146064.1  |  |
| Rad52b        | 734  | 1.37 | 0.20 | NM_025654.1  |  |
| Ehd4          | 977  | 1.37 | 0.14 | NM_133838    |  |
| 6720461J16Rik | 148  | 1.37 | 0.54 | NM_175551.2  |  |
| Plp2          | 3169 | 1.37 | 0.34 | NM_019755.2  |  |
| 6030458C11Rik | 390  | 1.37 | 0.03 | AK020074     |  |
| D19Etd678e    | 3929 | 1.37 | 0.64 | NM_023731.1  |  |
| Tbxa2r        | 50   | 1.37 | 0.32 | NM_009325.1  |  |
| Git1          | 96   | 1.37 | 0.20 |              |  |
| A230058N16Rik | 757  | 1.37 | 0.29 | AK038737     |  |
| Ftsj          | 156  | 1.37 | 0.32 | AK004357     |  |
| Pnkp          | 1629 | 1.37 | 0.02 | NM_021549.1  |  |
| Hist1h3d      | 101  | 1.37 | 0.38 | NM_178204.1  |  |
| Acaa1         | 2975 | 1.37 | 0.14 | NM_130864.2  |  |
| Fus           | 473  | 1.37 | 0.37 | NM_139149.1  |  |
| Lass2         | 2677 | 1.37 | 0.21 | NM_029789.1  |  |
| Efnb1         | 336  | 1.37 | 0.41 | NM_010110.2  |  |
| LOC280205     | 1144 | 1.37 | 0.16 | XM_207178.1  |  |
| Tm4sf13       | 71   | 1.37 | 0.31 | NM_025359.2  |  |
| Gltf          | 1833 | 1.37 | 0.53 | NM_019821.2  |  |
| B130008O17Rik | 171  | 1.37 | 0.25 | AK044865     |  |

|                  |       |      |      |             |  |
|------------------|-------|------|------|-------------|--|
| LOC380711        | 47    | 1.37 | 0.84 | XM_354625.1 |  |
| Tnfrsf9          | 48    | 1.37 | 0.34 | NM_011612.1 |  |
| 2610511E22Rik    | 309   | 1.37 | 0.40 | NM_029649.1 |  |
| Mocs1            | 313   | 1.37 | 0.23 | NM_020042.1 |  |
| Fxr2h            | 598   | 1.37 | 0.24 | NM_011814.1 |  |
| 2810449D17Rik    | 342   | 1.37 | 0.41 |             |  |
| Hiatl1           | 110   | 1.37 | 1.01 |             |  |
| Zfp1             | 241   | 1.37 | 0.74 | NM_024231.1 |  |
| Col16a1          | 187   | 1.37 | 0.24 | NM_028266.3 |  |
| Jtv1             | 1395  | 1.37 | 0.16 | NM_146165.1 |  |
| 2610010A15Rik    | 214   | 1.37 | 0.15 |             |  |
| Crsp9            | 1927  | 1.37 | 0.38 | NM_025426.2 |  |
| A930035G08Rik    | 68    | 1.37 | 0.15 | AK044714    |  |
| LOC214738        | 330   | 1.37 | 0.40 | XM_125109.2 |  |
| Eef1e1           | 2103  | 1.37 | 0.28 | NM_025380.1 |  |
| Osr1             | 1939  | 1.37 | 0.03 | XM_135264.4 |  |
| Dscr5            | 3352  | 1.37 | 0.51 | NM_019543.2 |  |
| Trim24           | 36    | 1.37 | 0.66 | AK080890    |  |
| Chka             | 1170  | 1.37 | 0.13 | NM_013490.1 |  |
| C730027P07Rik    | 57    | 1.37 | 0.17 | NM_177743.2 |  |
| 4930471O16Rik    | 771   | 1.37 | 0.46 | NM_026348.2 |  |
| Hrsp12           | 295   | 1.37 | 0.25 | NM_008287.2 |  |
| Trim56           | 131   | 1.37 | 0.41 | NM_201373.1 |  |
| 5830420C15Rik    | 130   | 1.37 | 0.46 | AK030841    |  |
| Cyhr1            | 446   | 1.37 | 0.31 | NM_180962.1 |  |
| D19Bwg1357e      | 8246  | 1.37 | 0.15 | NM_177474.2 |  |
| Arrdc1           | 120   | 1.37 | 0.64 | NM_178408.2 |  |
| Ppp1r8           | 1939  | 1.37 | 0.52 | NM_146154.1 |  |
| 1810015M01Rik    | 2045  | 1.37 | 0.47 | NM_026933.1 |  |
| Hsbp1            | 3263  | 1.37 | 0.40 | NM_024219.1 |  |
| Commd9           | 1649  | 1.37 | 0.31 | NM_029635.1 |  |
| Snrpa1           | 1050  | 1.37 | 0.18 | NM_021336   |  |
| Gtpbp5           | 127   | 1.37 | 0.32 | NM_181424.2 |  |
| C230052H12Rik    | 519   | 1.37 | 0.20 | NM_178643.3 |  |
| Vegfb            | 1303  | 1.37 | 0.82 | NM_011697.1 |  |
| Prpf38a          | 937   | 1.37 | 0.17 |             |  |
| Vdac1            | 10716 | 1.37 | 0.19 | NM_011694   |  |
| 2700060E02Rik    | 9415  | 1.37 | 0.24 | NM_026528.1 |  |
| scl0001978.1_6   | 343   | 1.37 | 0.17 |             |  |
| Tce4             | 902   | 1.37 | 0.39 | XM_489778   |  |
| 2010319C14Rik    | 6512  | 1.37 | 0.39 | NM_024464.2 |  |
| Aaas             | 709   | 1.37 | 0.07 | NM_153416.1 |  |
| Rbm17            | 1704  | 1.36 | 0.40 | NM_152824.1 |  |
| LOC242642        | 123   | 1.36 | 0.36 | XM_143930.1 |  |
| Ethe1            | 454   | 1.36 | 0.56 | NM_023154.2 |  |
| Synpo2l          | 60    | 1.36 | 0.53 | NM_175132.2 |  |
| 6030458H05       | 1138  | 1.36 | 0.00 | NM_177766.2 |  |
| Ssbp4            | 817   | 1.36 | 0.27 | XM_356132.1 |  |
| Gps2             | 900   | 1.36 | 0.26 | NM_019726   |  |
| G6pdx            | 458   | 1.36 | 0.26 | NM_008062.1 |  |
| 2310061A22Rik    | 369   | 1.36 | 0.12 | NM_025872   |  |
| AI317395         | 36    | 1.36 | 1.02 | NM_144821.2 |  |
| Scye1            | 3827  | 1.36 | 0.49 | NM_007926.1 |  |
| Notch4           | 76    | 1.36 | 0.18 | NM_010929   |  |
| Fnta             | 3293  | 1.36 | 0.25 | NM_008033.2 |  |
| 2410002F23Rik    | 800   | 1.36 | 0.10 | NM_025880.3 |  |
| A630072M18Rik    | 92    | 1.36 | 0.31 |             |  |
| Fev              | 447   | 1.36 | 0.69 | NM_153111.1 |  |
| Bbs5             | 1228  | 1.36 | 0.45 |             |  |
| Hps6             | 222   | 1.36 | 0.15 | NM_176785.1 |  |
| 2610207P08Rik    | 708   | 1.36 | 0.39 | XM_127746.2 |  |
| Cops7a           | 1356  | 1.36 | 0.25 | AK008474    |  |
| 1300017K07Rik    | 1457  | 1.36 | 0.42 | NM_027919.1 |  |
| Synj2bp          | 841   | 1.36 | 0.18 | NM_025292.2 |  |
| scl0003985.1_232 | 80    | 1.36 | 0.35 |             |  |
| LOC386233        | 269   | 1.36 | 0.05 | XM_359128.1 |  |
| 2410004C24Rik    | 354   | 1.36 | 0.36 | NM_133678.2 |  |
| Nipa1            | 1030  | 1.36 | 0.50 | NM_153578.1 |  |

|               |       |      |      |             |  |
|---------------|-------|------|------|-------------|--|
| Gstm5         | 633   | 1.36 | 0.28 | NM_010360.1 |  |
| Rpain         | 277   | 1.36 | 0.43 |             |  |
| Rpl3          | 31037 | 1.36 | 0.18 | NM_013762   |  |
| 2310022A10Rik | 1510  | 1.36 | 0.11 | NM_175107   |  |
| Capzb         | 1969  | 1.36 | 0.37 | NM_009798.1 |  |
| Prkr          | 1301  | 1.36 | 0.20 | NM_011163.2 |  |
| BC006705      | 556   | 1.36 | 0.10 | NM_145404.1 |  |
| LOC234374     | 414   | 1.36 | 0.25 | XM_134242.3 |  |
| Taldo1        | 5583  | 1.36 | 0.29 | NM_011528.1 |  |
| Mtvr2         | 401   | 1.36 | 0.50 | NM_023166   |  |
| Fkbp4         | 8232  | 1.36 | 0.64 | NM_010219   |  |
| Fkbp1         | 109   | 1.36 | 0.26 | NM_019873.2 |  |
| E130309L16Rik | 69    | 1.36 | 0.76 | AK053808    |  |
| Map2k2        | 1591  | 1.36 | 0.01 | NM_023138.3 |  |
| 2700038N03Rik | 861   | 1.36 | 0.40 | NM_027356.1 |  |
| 2310079P03Rik | 912   | 1.36 | 0.19 | AK010232    |  |
| 4930432N22Rik | 209   | 1.36 | 0.39 | AK076756    |  |
| Mrps15        | 350   | 1.36 | 0.53 | NM_025544.1 |  |
| Ptplb         | 553   | 1.36 | 0.42 | NM_023587   |  |
| Rnf166        | 565   | 1.36 | 0.19 | XM_134599.3 |  |
| E130118D18Rik | 972   | 1.36 | 0.20 | AK087438    |  |
| 9430029L20Rik | 650   | 1.36 | 0.65 |             |  |
| H2-T9         | 107   | 1.36 | 0.08 | NM_010399   |  |
| D7Rp2e        | 1628  | 1.36 | 0.18 | NM_033080.1 |  |
| A130052D22    | 80    | 1.36 | 0.59 | NM_183306.1 |  |
| Gemin5        | 213   | 1.36 | 0.30 | NM_172558.1 |  |
| 5530400B01Rik | 1849  | 1.36 | 0.43 |             |  |
| Sap30         | 5281  | 1.36 | 0.17 | NM_021788.1 |  |
| D930009C14Rik | 35    | 1.36 | 0.75 | AK086164    |  |
| Ccnd3         | 545   | 1.36 | 0.24 | NM_007632.1 |  |
| 2610524G07Rik | 5156  | 1.36 | 0.41 | NM_025596   |  |
| Mrps23        | 3544  | 1.36 | 0.40 | NM_024174.4 |  |
| 5730470C09Rik | 51    | 1.36 | 0.42 | AK082951    |  |
| B230387C07Rik | 605   | 1.36 | 0.24 | AK046455    |  |
| 1200011O22Rik | 921   | 1.36 | 0.15 | NM_027891.1 |  |
| Ltb4r1        | 31    | 1.36 | 1.33 | NM_008519.1 |  |
| 2610524F24Rik | 209   | 1.36 | 0.08 | AK012141    |  |
| 2900093E15Rik | 46    | 1.36 | 0.46 | AK013846    |  |
| Tpmt          | 111   | 1.36 | 0.19 | NM_016785   |  |
| LOC382157     | 2358  | 1.36 | 0.21 | XM_356256.1 |  |
| Rce1          | 1140  | 1.36 | 0.34 | NM_023131.1 |  |
| Al481716      | 50    | 1.36 | 0.78 |             |  |
| Ppm1f         | 466   | 1.36 | 0.12 | NM_176833.2 |  |
| Agtrap        | 215   | 1.36 | 0.39 | NM_009642.3 |  |
| Sdhd          | 480   | 1.36 | 0.10 | NM_025848.1 |  |
| Dorz1         | 529   | 1.36 | 0.71 | NM_145919   |  |
| 5330438D12Rik | 592   | 1.36 | 0.40 | NM_183200.1 |  |
| LOC329680     | 366   | 1.35 | 0.67 | XM_283867.2 |  |
| 2900027M19Rik | 76    | 1.35 | 0.31 | AK013604    |  |
| 4732458O05Rik | 45    | 1.35 | 0.50 | AK028819    |  |
| 1600002K03Rik | 482   | 1.35 | 0.22 | XM_354548.1 |  |
| 2410080P20Rik | 347   | 1.35 | 0.23 | NM_026464.2 |  |
| LOC382617     | 191   | 1.35 | 0.29 | XM_356594.1 |  |
| Arpc4         | 1069  | 1.35 | 0.22 | AK030840    |  |
| Pard6a        | 583   | 1.35 | 0.61 | NM_019695   |  |
| Mxd3          | 258   | 1.35 | 0.17 | NM_016662.2 |  |
| LOC381290     | 51    | 1.35 | 0.78 | XM_355232.1 |  |
| 2900057K09Rik | 481   | 1.35 | 0.07 | NM_175388.2 |  |
| Rhou          | 223   | 1.35 | 0.22 | NM_133955.1 |  |
| Mocs2         | 1399  | 1.35 | 0.21 | NM_013826.1 |  |
| Neud4         | 56    | 1.35 | 0.62 | NM_013874.1 |  |
| 8430410A17Rik | 893   | 1.35 | 0.27 | NM_173737.2 |  |
| Thtpa         | 1758  | 1.35 | 0.18 | NM_153083   |  |
| Erf           | 146   | 1.35 | 0.41 | NM_010155.2 |  |
| 2510027J23Rik | 121   | 1.35 | 0.16 | NM_025637.1 |  |
| Pld3          | 3015  | 1.35 | 0.19 | NM_011116.1 |  |
| BC027373      | 75    | 1.35 | 0.10 | NM_182782.1 |  |
| Por           | 1694  | 1.35 | 0.12 | NM_008898.1 |  |

|               |       |      |      |             |  |
|---------------|-------|------|------|-------------|--|
| 1700025B16Rik | 258   | 1.35 | 0.14 | NM_139139.1 |  |
| A630095E13Rik | 145   | 1.35 | 0.20 |             |  |
| AV028368      | 563   | 1.35 | 0.21 | NM_177672   |  |
| LOC381250     | 119   | 1.35 | 0.62 | XM_355192.1 |  |
| Cyb5          | 939   | 1.35 | 0.52 | NM_025797   |  |
| Ergic3        | 2899  | 1.35 | 0.31 |             |  |
| Htr4          | 55    | 1.35 | 0.49 | NM_008313   |  |
| 1600019D15Rik | 3157  | 1.35 | 0.36 | NM_028975.2 |  |
| Arl6ip5       | 1857  | 1.35 | 0.25 | NM_022992.1 |  |
| Dnahc8        | 131   | 1.35 | 0.53 | NM_013811.1 |  |
| Zfp771        | 195   | 1.35 | 0.39 |             |  |
| 5730589L02Rik | 94    | 1.35 | 0.70 | NM_029934.2 |  |
| LOC383981     | 23594 | 1.35 | 0.46 | XM_357361.1 |  |
| LOC242703     | 305   | 1.35 | 0.38 | XM_144101.1 |  |
| Dtymk         | 2439  | 1.35 | 0.26 | NM_023136.1 |  |
| Nudt13        | 101   | 1.35 | 0.42 | NM_026341   |  |
| 1810030N24Rik | 640   | 1.35 | 0.52 | NM_025471   |  |
| D10Bur2e      | 156   | 1.35 | 0.13 | NM_027480.1 |  |
| Esd           | 213   | 1.35 | 0.27 | NM_016903   |  |
| Sri           | 857   | 1.35 | 0.25 | NM_025618.1 |  |
| Gcat          | 455   | 1.35 | 0.08 | AK076469    |  |
| Slc22a17      | 47    | 1.35 | 0.41 | NM_021551   |  |
| 4930474M22Rik | 55    | 1.35 | 0.14 | NM_183107.1 |  |
| Jmjd3         | 508   | 1.35 | 0.35 | XM_126426.3 |  |
| LOC385454     | 774   | 1.35 | 0.19 | XM_358238.1 |  |
| Bag1          | 11804 | 1.35 | 0.13 | NM_009736.1 |  |
| Mesdc1        | 60    | 1.35 | 0.29 | NM_030705.2 |  |
| 2810028B13Rik | 55    | 1.35 | 0.31 |             |  |
| LOC277193     | 1327  | 1.35 | 0.42 | XM_203663.2 |  |
| 1110008F13Rik | 2715  | 1.35 | 0.42 | NM_026124.1 |  |
| 9430080K19Rik | 8035  | 1.35 | 0.30 |             |  |
| Lhfp12        | 241   | 1.35 | 0.21 | NM_172589.1 |  |
| BC060267      | 69    | 1.35 | 0.12 | NM_198603.1 |  |
| Slc35b1       | 3702  | 1.35 | 0.26 | XM_128634.4 |  |
| Polr2k        | 319   | 1.35 | 0.45 | NM_023127   |  |
| Vax1          | 61    | 1.35 | 0.24 | XM_147282.1 |  |
| BC044804      | 1550  | 1.35 | 0.43 | NM_178035   |  |
| Id2           | 1461  | 1.35 | 0.40 |             |  |
| Rps4x         | 11841 | 1.35 | 0.32 | NM_009094   |  |
| LOC381492     | 67    | 1.35 | 0.61 | XM_358598.1 |  |
| LOC384315     | 259   | 1.35 | 0.43 | XM_357564.1 |  |
| Ppif          | 4038  | 1.35 | 0.12 | NM_134084.1 |  |
| Clta          | 1394  | 1.35 | 0.51 | NM_016760.1 |  |
| Tcf11         | 277   | 1.35 | 0.97 | NM_009336.1 |  |
| Eef1a2        | 6912  | 1.35 | 0.47 | NM_007906.2 |  |
| Coq6          | 1276  | 1.35 | 0.16 | NM_172582.1 |  |
| R74862        | 147   | 1.35 | 0.28 | NM_133790   |  |
| LOC269542     | 302   | 1.35 | 0.13 | XM_194143.2 |  |
| 1810043M15Rik | 1808  | 1.35 | 0.30 | NM_199056.1 |  |
| Fkbp8         | 2646  | 1.35 | 0.66 | NM_010223.1 |  |
| B230333E16Rik | 1969  | 1.35 | 0.29 | AK046010    |  |
| Irak2         | 182   | 1.35 | 0.10 | NM_172161.2 |  |
| BC005682      | 329   | 1.35 | 0.23 | NM_033562.2 |  |
| D430023H11Rik | 62    | 1.35 | 0.27 | AK052441    |  |
| Pcsk4         | 128   | 1.35 | 0.54 | NM_008793.1 |  |
| Setd6         | 752   | 1.35 | 0.28 |             |  |
| Sumf2         | 194   | 1.35 | 0.36 | XM_355742   |  |
| 2310066N05Rik | 966   | 1.35 | 0.27 | NM_027371.1 |  |
| 2510022D24Rik | 48    | 1.35 | 0.40 |             |  |
| Rab4a         | 367   | 1.35 | 0.56 | NM_009003.1 |  |
| H2-T17        | 82    | 1.35 | 0.85 | NM_010396   |  |
| BC057552      | 694   | 1.35 | 0.21 | NM_172502.1 |  |
| Gin1          | 147   | 1.35 | 0.36 | AK018404    |  |
| mtDNA_ATP8    | 52640 | 1.35 | 0.06 |             |  |
| Cdca8         | 1630  | 1.35 | 0.36 | NM_026560.1 |  |
| Bcas1         | 922   | 1.35 | 0.38 | NM_029815.1 |  |
| D19Ert144e    | 1511  | 1.35 | 0.33 | NM_026373.1 |  |
| 2310014B11Rik | 70    | 1.35 | 0.18 | AK009331    |  |

|                 |       |      |      |             |  |
|-----------------|-------|------|------|-------------|--|
| scl0000102.1_16 | 101   | 1.35 | 0.06 |             |  |
| Tcof1           | 923   | 1.35 | 0.27 | NM_011552.1 |  |
| Chd7            | 1038  | 1.35 | 0.19 | XM_149413.3 |  |
| Bbc3            | 622   | 1.35 | 0.23 | NM_133234.1 |  |
| Exosc6          | 289   | 1.35 | 0.84 | NM_028274   |  |
| Map4k6-pending  | 87    | 1.34 | 0.28 | BC011346    |  |
| A530050E01Rik   | 215   | 1.34 | 0.25 | AK040949    |  |
| Sult4a1         | 4891  | 1.34 | 0.08 | NM_013873.3 |  |
| A430106B04Rik   | 202   | 1.34 | 0.25 | AK040546    |  |
| Sf3a2           | 58    | 1.34 | 1.09 | NM_013651.3 |  |
| Nr1h3           | 81    | 1.34 | 0.40 | NM_013839.1 |  |
| Hmgcl           | 2235  | 1.34 | 0.08 | NM_008254.1 |  |
| Camta1          | 1107  | 1.34 | 0.31 | XM_355539   |  |
| 1810059A23Rik   | 594   | 1.34 | 0.06 | NM_178051.3 |  |
| Zfp187          | 594   | 1.34 | 0.56 |             |  |
| Rab24           | 1388  | 1.34 | 0.32 | NM_009000.2 |  |
| LOC268393       | 618   | 1.34 | 0.10 | XM_196027.3 |  |
| Rfc3            | 709   | 1.34 | 0.23 | AK013095    |  |
| B4galt1         | 648   | 1.34 | 0.23 | NM_022305.2 |  |
| B930011P16Rik   | 118   | 1.34 | 0.08 | NM_207282.1 |  |
| Prr3            | 344   | 1.34 | 0.23 | NM_145487.2 |  |
| Pcdhgc5         | 210   | 1.34 | 0.23 | NM_033583.2 |  |
| Mthfsd          | 83    | 1.34 | 0.48 |             |  |
| Rbm38           | 401   | 1.34 | 0.71 |             |  |
| EG622339        | 62365 | 1.34 | 0.33 |             |  |
| Cr1s1           | 508   | 1.34 | 0.34 |             |  |
| ldh3b           | 4939  | 1.34 | 0.50 | NM_130884.1 |  |
| scl0001923.1_57 | 132   | 1.34 | 0.47 |             |  |
| Nup43           | 1889  | 1.34 | 0.51 | NM_145706.1 |  |
| Fut2            | 2703  | 1.34 | 0.36 | NM_018876.2 |  |
| Tbx19           | 7153  | 1.34 | 0.25 | NM_032005.2 |  |
| 2010311D03Rik   | 2911  | 1.34 | 0.18 | NM_133839.1 |  |
| AI316787        | 6362  | 1.34 | 0.10 | NM_199199.1 |  |
| Cplx2           | 1482  | 1.34 | 0.78 | NM_009946.1 |  |
| Smcr7           | 138   | 1.34 | 0.32 |             |  |
| LOC236955       | 219   | 1.34 | 0.30 | XM_150424.2 |  |
| Rnf32           | 83    | 1.34 | 0.34 | NM_021470.3 |  |
| Mybl2           | 968   | 1.34 | 0.14 | NM_008652.2 |  |
| 1110005F07Rik   | 3328  | 1.34 | 0.11 | NM_025383   |  |
| Mkrm2           | 598   | 1.34 | 0.22 | NM_023290.1 |  |
| Surf6           | 96    | 1.34 | 0.07 | NM_009298.2 |  |
| Olf1r538        | 94    | 1.34 | 0.19 |             |  |
| LOC224532       | 1743  | 1.34 | 0.15 | XM_128427.3 |  |
| Taf15           | 203   | 1.34 | 0.42 | AK011843    |  |
| 1110050F08Rik   | 34    | 1.34 | 0.91 | AK004216    |  |
| LOC208092       | 1660  | 1.34 | 0.23 | XM_126613.3 |  |
| 4930524J08Rik   | 471   | 1.34 | 0.36 |             |  |
| Capn10          | 277   | 1.34 | 0.43 | NM_011796.1 |  |
| LOC214568       | 54    | 1.34 | 0.34 | XM_131358.2 |  |
| Silg111         | 1237  | 1.34 | 0.33 |             |  |
| Gtf3c5          | 611   | 1.34 | 0.13 | NM_148928.1 |  |
| LOC231081       | 1210  | 1.34 | 0.10 | XM_131957.2 |  |
| C230060F13Rik   | 59    | 1.34 | 0.28 | AK082536    |  |
| 1700023M03Rik   | 305   | 1.34 | 0.52 | NM_027078.1 |  |
| E130314A20Rik   | 40    | 1.34 | 1.05 | AK053830    |  |
| E030007H10Rik   | 110   | 1.34 | 0.59 | AK086878    |  |
| Trex2           | 44    | 1.34 | 0.53 | NM_011907.2 |  |
| 6430517G15Rik   | 44    | 1.34 | 1.14 | AK032298    |  |
| 2310010G13Rik   | 125   | 1.34 | 0.25 | NM_027122.2 |  |
| EG231903        | 340   | 1.34 | 0.41 |             |  |
| Grcc9           | 106   | 1.34 | 0.93 | NM_013539.1 |  |
| C1qtnf6         | 47    | 1.34 | 0.70 | NM_028331.2 |  |
| 1700012G19Rik   | 17972 | 1.34 | 0.35 | NM_025954.2 |  |
| Lrrc28          | 500   | 1.34 | 0.16 | NM_175124.3 |  |
| Mrpl4           | 686   | 1.34 | 0.51 | NM_023167.1 |  |
| Hagh            | 2252  | 1.34 | 0.39 | NM_024284.1 |  |
| Hn1             | 8269  | 1.34 | 0.10 | NM_008258.1 |  |
| 2300004C15Rik   | 299   | 1.34 | 0.59 | XM_147000.1 |  |

|               |       |      |      |             |  |
|---------------|-------|------|------|-------------|--|
| 3110082I17Rik | 443   | 1.34 | 0.50 | NM_028469.1 |  |
| D1Bwg1363e    | 644   | 1.34 | 0.19 | XM_129886.4 |  |
| F730017E11Rik | 177   | 1.34 | 0.87 | AK089379    |  |
| Cpsf5         | 1060  | 1.34 | 0.27 | NM_026623.1 |  |
| 9130019I15Rik | 30    | 1.34 | 1.25 | XM_356104   |  |
| 2310035N23Rik | 137   | 1.34 | 0.15 |             |  |
| Erdr1         | 3768  | 1.34 | 0.41 | NM_133362.1 |  |
| 0610009B22Rik | 1895  | 1.34 | 0.22 | NM_025319.1 |  |
| 1110007L15Rik | 4052  | 1.34 | 0.25 | NM_026269.1 |  |
| 0610007P14Rik | 1837  | 1.34 | 0.38 | NM_021446   |  |
| Tspan31       | 186   | 1.34 | 0.42 |             |  |
| Tmprss11a     | 47    | 1.34 | 0.53 |             |  |
| Nxn           | 390   | 1.34 | 0.10 | NM_008750.2 |  |
| Dgat1         | 108   | 1.34 | 0.64 | NM_010046.2 |  |
| BC037527      | 71    | 1.34 | 0.87 | NM_172259.1 |  |
| 5430433G21Rik | 284   | 1.34 | 0.14 | XM_283765.2 |  |
| 2010007E07Rik | 1133  | 1.34 | 0.12 | AK008144    |  |
| Fastk         | 538   | 1.34 | 0.44 | NM_023229.1 |  |
| LOC239102     | 632   | 1.34 | 0.31 | XM_139193.4 |  |
| Etv5          | 42    | 1.34 | 0.47 | NM_023794   |  |
| 2810055E05Rik | 736   | 1.34 | 0.29 | NM_153160.2 |  |
| Rnu70         | 95    | 1.34 | 0.42 |             |  |
| Apof          | 76    | 1.34 | 0.35 | NM_133997.1 |  |
| Tpi1          | 17513 | 1.34 | 0.12 | NM_009415.1 |  |
| Dhrsx         | 1003  | 1.34 | 0.48 | XM_135485.4 |  |
| 1700037H04Rik | 6340  | 1.34 | 0.30 | NM_026091.1 |  |
| BC052360      | 430   | 1.34 | 0.08 | XM_132552.3 |  |
| Arfgap1       | 448   | 1.34 | 0.13 | NM_145760.2 |  |
| Arfrp1        | 571   | 1.34 | 0.39 | NM_029702.2 |  |
| Chkb          | 820   | 1.34 | 0.18 | NM_007692   |  |
| Mnat1         | 2141  | 1.34 | 0.17 | NM_008612.1 |  |
| Npepl1        | 7974  | 1.34 | 0.30 | NM_213733   |  |
| Rhoc          | 105   | 1.34 | 0.67 | NM_007484.1 |  |
| LOC385171     | 434   | 1.34 | 0.34 | XM_358100.1 |  |
| 1700086G18Rik | 39    | 1.34 | 0.37 | AK007018    |  |
| Clu           | 4362  | 1.34 | 0.01 | NM_013492.1 |  |
| 2810012H18Rik | 920   | 1.34 | 0.30 |             |  |
| Adprh         | 4303  | 1.34 | 0.34 | NM_007414.2 |  |
| Ak2           | 3118  | 1.34 | 0.17 | NM_016895.2 |  |
| Crsp8         | 1175  | 1.34 | 0.17 | NM_026896.1 |  |
| Cryab         | 78    | 1.34 | 0.96 | NM_009964.1 |  |
| Pxmp4         | 592   | 1.34 | 0.34 | NM_021534.2 |  |
| Hist2h2aa1    | 108   | 1.34 | 0.10 | NM_013549.1 |  |
| Nubp2         | 1067  | 1.34 | 0.20 | NM_011956.2 |  |
| Acin1         | 181   | 1.34 | 0.32 | NM_023190.1 |  |
| Eif2b3        | 1245  | 1.33 | 0.07 | XM_131572.4 |  |
| Dap3          | 9548  | 1.33 | 0.23 | NM_022994.2 |  |
| Chaf1a        | 606   | 1.33 | 0.40 | NM_013733.2 |  |
| Snca          | 1250  | 1.33 | 0.27 | AK014472    |  |
| Xylb          | 148   | 1.33 | 0.39 | XM_135223.2 |  |
| BC021611      | 100   | 1.33 | 0.57 | NM_144932.2 |  |
| A230106M15Rik | 562   | 1.33 | 0.05 | NM_175474.2 |  |
| Bag5          | 834   | 1.33 | 0.38 | XM_127149.3 |  |
| Rpn2          | 39430 | 1.33 | 0.19 |             |  |
| LOC225118     | 1054  | 1.33 | 0.11 | XM_128863.3 |  |
| LOC216674     | 335   | 1.33 | 0.26 | XM_126090.3 |  |
| Usp21         | 304   | 1.33 | 0.20 | NM_013919.2 |  |
| Mkks          | 288   | 1.33 | 0.09 | NM_021527.1 |  |
| 2810012L14Rik | 377   | 1.33 | 0.19 | NM_029581.1 |  |
| Fadd          | 731   | 1.33 | 0.18 | NM_010175.2 |  |
| Adck4         | 668   | 1.33 | 0.13 | NM_133770.1 |  |
| H2afv         | 1485  | 1.33 | 0.40 | XM_126043.3 |  |
| Uchl3         | 282   | 1.33 | 0.58 | NM_016723   |  |
| Arcp2         | 5809  | 1.33 | 0.14 | XM_129773.5 |  |
| D15Mgi27      | 894   | 1.33 | 0.16 | NM_134100.2 |  |
| LOC218963     | 53710 | 1.33 | 0.23 |             |  |
| Glr2          | 228   | 1.33 | 0.48 | NM_023505   |  |
| 2310047M10Rik | 811   | 1.33 | 0.09 | XM_484040   |  |



|                 |       |      |      |             |  |
|-----------------|-------|------|------|-------------|--|
| BC031181        | 2245  | 1.33 | 0.38 |             |  |
| 0610037L13Rik   | 788   | 1.33 | 0.09 | NM_028754.1 |  |
| Pcbd            | 260   | 1.33 | 0.30 | NM_025273.1 |  |
| 1810053B01Rik   | 102   | 1.33 | 0.81 |             |  |
| Hist1h2bk       | 162   | 1.33 | 0.23 | NM_175665.1 |  |
| Prr7            | 378   | 1.33 | 0.08 |             |  |
| 2010317E24Rik   | 643   | 1.33 | 0.43 | XM_130053.2 |  |
| Athl1           | 71    | 1.33 | 0.49 |             |  |
| 1700020M16Rik   | 670   | 1.33 | 0.07 | XM_127811.4 |  |
| 6530401C20Rik   | 44    | 1.33 | 0.49 | NM_173405   |  |
| Rfc5            | 445   | 1.33 | 0.24 | AK011931    |  |
| Lep             | 64    | 1.33 | 0.53 | NM_008493.3 |  |
| C730015P05Rik   | 128   | 1.33 | 0.15 | AK050106    |  |
| Unc119          | 308   | 1.33 | 0.42 | NM_011676.2 |  |
| A130064M08Rik   | 158   | 1.33 | 0.27 | AK037929    |  |
| Pmvk            | 513   | 1.33 | 0.20 | NM_026784.1 |  |
| Med6            | 1538  | 1.33 | 0.17 | NM_027213.2 |  |
| Ube2e1          | 421   | 1.33 | 0.05 | NM_009455.2 |  |
| Il17rc          | 711   | 1.33 | 0.15 | NM_134159.2 |  |
| scl0003131.1_3  | 49    | 1.33 | 0.03 |             |  |
| Cdkn2b          | 599   | 1.33 | 0.10 | NM_007670.2 |  |
| 4930570C03Rik   | 2028  | 1.33 | 0.11 | NM_026353.2 |  |
| Pex14           | 2031  | 1.33 | 0.07 | NM_019781.1 |  |
| D730039F16Rik   | 120   | 1.33 | 0.25 | XM_130196   |  |
| Rfng            | 150   | 1.33 | 0.74 | NM_009053.1 |  |
| A330102H22Rik   | 76    | 1.33 | 0.03 | XM_355150.1 |  |
| Mbd3            | 1524  | 1.33 | 0.45 | NM_013595.1 |  |
| 1110001A23Rik   | 339   | 1.33 | 0.19 | XM_133645.4 |  |
| Gal3st4         | 37    | 1.33 | 0.82 |             |  |
| C230080E09Rik   | 327   | 1.33 | 0.08 | AK082664    |  |
| 1110065P20Rik   | 434   | 1.33 | 0.36 | XM_149496.3 |  |
| Arpc5l          | 524   | 1.33 | 0.47 | NM_028809.1 |  |
| Etf1            | 4943  | 1.33 | 0.08 | NM_144866.2 |  |
| Tmem87a         | 1184  | 1.33 | 0.18 |             |  |
| 9430073L23Rik   | 35    | 1.33 | 0.74 | AK035013    |  |
| Psmf1           | 1333  | 1.33 | 0.09 | NM_144889.1 |  |
| LOC233908       | 275   | 1.33 | 0.06 | XM_150004.1 |  |
| Gipc2           | 78    | 1.33 | 0.80 |             |  |
| Cox7a2l         | 1549  | 1.33 | 0.23 | XM_123188.1 |  |
| Taf13           | 322   | 1.33 | 0.21 | NM_025444   |  |
| 5730427N09Rik   | 5538  | 1.33 | 0.48 | NM_021552.1 |  |
| 0610041B22Rik   | 593   | 1.33 | 0.07 | NM_025340.1 |  |
| Armet           | 57    | 1.33 | 0.29 | NM_029103.1 |  |
| Fbxo4           | 488   | 1.33 | 0.07 | NM_134099   |  |
| 9430038l01Rik   | 260   | 1.33 | 0.32 | XM_133909.3 |  |
| Rtkn            | 115   | 1.33 | 0.72 | NM_133641.1 |  |
| Brms1           | 1928  | 1.33 | 0.14 | NM_134155.1 |  |
| Pgpep1          | 383   | 1.33 | 0.22 | NM_023217.2 |  |
| Ppt2            | 108   | 1.33 | 0.50 | NM_019441.2 |  |
| Prdx4           | 11435 | 1.33 | 0.48 | AK014651    |  |
| Pdgfc           | 57    | 1.33 | 0.32 | NM_019971.2 |  |
| 1110006G06Rik   | 1009  | 1.33 | 0.16 | NM_028661.1 |  |
| LOC234882       | 5915  | 1.33 | 0.39 | XM_125096.3 |  |
| EG330503        | 102   | 1.33 | 0.19 |             |  |
| Snx21           | 983   | 1.33 | 0.08 |             |  |
| C530043K16Rik   | 54    | 1.33 | 0.43 | NM_177241.2 |  |
| 2010012F05Rik   | 2589  | 1.33 | 0.40 | NM_029362.2 |  |
| Zfhx2           | 855   | 1.33 | 0.46 |             |  |
| LOC329190       | 52    | 1.33 | 0.47 | XM_283627.2 |  |
| Il4i1           | 129   | 1.33 | 0.10 | NM_010215.1 |  |
| Mylc2b          | 2561  | 1.33 | 0.27 | NM_023402.1 |  |
| Smpd2           | 317   | 1.32 | 0.39 | NM_009213.1 |  |
| 2310050B20Rik   | 1194  | 1.32 | 0.16 | NM_025537.2 |  |
| Tmco5           | 40    | 1.32 | 0.88 |             |  |
| scl0002449.1_77 | 1921  | 1.32 | 0.24 |             |  |
| Trappc5         | 100   | 1.32 | 0.67 | NM_025701.2 |  |
| 3010026O09Rik   | 871   | 1.32 | 0.55 | NM_026543.1 |  |
| D4Wsu114e       | 250   | 1.32 | 0.26 |             |  |

|               |      |      |      |             |  |
|---------------|------|------|------|-------------|--|
| Kcnk1         | 4041 | 1.32 | 0.18 | NM_008430   |  |
| Gm853         | 192  | 1.32 | 0.45 |             |  |
| LOC382461     | 68   | 1.32 | 0.39 | XM_356518.1 |  |
| Nfkbia        | 215  | 1.32 | 0.34 | NM_010907   |  |
| 2210016L21Rik | 460  | 1.32 | 0.49 | NM_028211.1 |  |
| 0610025L06Rik | 160  | 1.32 | 0.32 | NM_172397.1 |  |
| Amd1          | 68   | 1.32 | 0.43 | NM_009665.2 |  |
| D430035B07Rik | 72   | 1.32 | 0.57 | AK085087    |  |
| 1810026B05Rik | 1637 | 1.32 | 0.71 | XM_489186   |  |
| 9430016H08Rik | 1447 | 1.32 | 0.39 | XM_283579.2 |  |
| Olfr257       | 66   | 1.32 | 0.36 | NM_207554   |  |
| Dexi          | 692  | 1.32 | 0.32 | AK032104    |  |
| LOC330553     | 97   | 1.32 | 0.22 | XM_284311.2 |  |
| B430306N03Rik | 40   | 1.32 | 0.45 | NM_177083.2 |  |
| Gfer          | 2939 | 1.32 | 0.11 | NM_023040.2 |  |
| 2900009J06Rik | 50   | 1.32 | 0.19 |             |  |
| 1110020C13Rik | 8124 | 1.32 | 0.21 | NM_025385.2 |  |
| 1500032H18Rik | 737  | 1.32 | 0.26 | XM_129802.2 |  |
| Prkag1        | 814  | 1.32 | 0.40 | NM_016781   |  |
| Fbf1          | 277  | 1.32 | 0.07 | NM_172571.2 |  |
| Pam           | 218  | 1.32 | 0.30 | NM_013626.1 |  |
| Isy1          | 1441 | 1.32 | 0.11 |             |  |
| Taf6          | 422  | 1.32 | 0.04 | NM_009315.1 |  |
| Snap29        | 1403 | 1.32 | 0.16 | NM_023348.3 |  |
| LOC385642     | 41   | 1.32 | 0.24 | XM_359238.1 |  |
| Siat7d        | 345  | 1.32 | 0.11 | NM_011373.1 |  |
| Zfp312        | 130  | 1.32 | 0.25 | NM_080433   |  |
| A130023E24Rik | 79   | 1.32 | 0.37 | AK037522    |  |
| Ext2          | 917  | 1.32 | 0.32 | AK084772    |  |
| ldb1          | 2215 | 1.32 | 0.38 | NM_010495.1 |  |
| Ap3s1         | 1772 | 1.32 | 0.23 | NM_009681.2 |  |
| 4930429O20Rik | 339  | 1.32 | 0.21 | NM_029025   |  |
| Tex292        | 7396 | 1.32 | 0.34 | NM_011574.1 |  |
| Atp6ap1       | 7968 | 1.32 | 0.13 | NM_018794.2 |  |
| F430201B04Rik | 46   | 1.32 | 0.63 |             |  |
| 2700038L12Rik | 442  | 1.32 | 0.25 | NM_023191.1 |  |
| LOC381805     | 37   | 1.32 | 0.56 | XM_355805.1 |  |
| Chrd          | 309  | 1.32 | 0.24 | NM_009893.1 |  |
| 9630027A13Rik | 597  | 1.32 | 0.08 | AK036011    |  |
| D5Ertid593e   | 3144 | 1.32 | 0.18 | NM_175096.2 |  |
| Irf1          | 979  | 1.32 | 0.04 | NM_008390.1 |  |
| LOC383836     | 72   | 1.32 | 0.29 | XM_357284.1 |  |
| B130065L01    | 57   | 1.32 | 0.59 |             |  |
| Txndc5        | 3565 | 1.32 | 0.25 | NM_145367.2 |  |
| Mmp23         | 357  | 1.32 | 0.20 | NM_011985.1 |  |
| Ppp1r13l      | 69   | 1.32 | 0.61 |             |  |
| Afg3l1        | 804  | 1.32 | 0.14 | AK088172    |  |
| Gng10         | 6210 | 1.32 | 0.49 | NM_025277   |  |
| Cgnl1         | 44   | 1.32 | 0.34 |             |  |
| Smg5          | 181  | 1.32 | 0.10 |             |  |
| 2900060M06Rik | 54   | 1.32 | 0.46 | AK013737    |  |
| Gpr3          | 45   | 1.32 | 0.35 | NM_008154.1 |  |
| Hoxa5         | 841  | 1.32 | 0.25 | NM_010453.2 |  |
| Troap         | 1217 | 1.32 | 0.05 | XM_283286.2 |  |
| 1700052O22Rik | 715  | 1.32 | 0.11 |             |  |
| Rfesd         | 70   | 1.32 | 0.28 |             |  |
| 2410118P20Rik | 351  | 1.32 | 0.18 | XM_133655.3 |  |
| Cd59a         | 1433 | 1.32 | 0.14 | NM_007652.2 |  |
| 5830436K05Rik | 54   | 1.32 | 0.32 | AK032734    |  |
| D10Bwg1364e   | 3310 | 1.32 | 0.56 |             |  |
| Zbtb17        | 3899 | 1.32 | 0.15 | NM_009541.1 |  |
| C430004E15Rik | 1813 | 1.32 | 0.39 | NM_175286.2 |  |
| 2900006F19Rik | 100  | 1.32 | 0.13 | XM_355346   |  |
| B930010L06Rik | 44   | 1.32 | 0.34 | AK047003    |  |
| Hist1h4i      | 70   | 1.32 | 0.49 | NM_175656   |  |
| Ube2h         | 1486 | 1.32 | 0.21 | NM_009459   |  |
| 2610510B01Rik | 41   | 1.32 | 0.50 | XM_354972   |  |
| Spdef         | 57   | 1.32 | 0.57 | NM_013891.2 |  |

|                |       |      |      |             |  |
|----------------|-------|------|------|-------------|--|
| 1810030A06Rik  | 355   | 1.32 | 0.11 |             |  |
| 9330155C01Rik  | 785   | 1.32 | 0.10 | AK034086    |  |
| 6430407D20Rik  | 400   | 1.32 | 0.37 | AK018273    |  |
| 1810020C19Rik  | 2351  | 1.32 | 0.25 | XM_130317.5 |  |
| 5430431G03Rik  | 175   | 1.32 | 0.38 | NM_026235.2 |  |
| Tssc4          | 589   | 1.32 | 0.40 | NM_020285.1 |  |
| Gm169          | 976   | 1.32 | 0.42 | NM_199301   |  |
| Ctdsp1         | 183   | 1.32 | 0.67 | NM_153088.1 |  |
| 1500019G21Rik  | 930   | 1.32 | 0.54 | NM_024172.2 |  |
| Tk1            | 406   | 1.32 | 0.13 | NM_009387   |  |
| Sat2           | 60    | 1.32 | 0.32 | XM_181304.3 |  |
| Dedd           | 703   | 1.32 | 0.29 | NM_011615.2 |  |
| Wnt10a         | 3698  | 1.32 | 0.17 | NM_009518.1 |  |
| LOC384766      | 46    | 1.32 | 0.06 | XM_357852.1 |  |
| C86987         | 332   | 1.32 | 0.54 | XM_127523.2 |  |
| Ptk9l          | 1093  | 1.32 | 0.29 | NM_011876.2 |  |
| Mpp3           | 1924  | 1.32 | 0.08 | NM_007863.1 |  |
| Fance          | 268   | 1.32 | 0.25 | XM_283409.2 |  |
| Slc35f3        | 904   | 1.32 | 0.21 | NM_175434.2 |  |
| Bing4          | 616   | 1.32 | 0.26 | NM_020603.2 |  |
| LOC383099      | 9888  | 1.32 | 0.37 | XM_356873.1 |  |
| 2510048K03Rik  | 1469  | 1.32 | 0.11 | NM_028243.1 |  |
| 1110025F24Rik  | 1313  | 1.32 | 0.38 | NM_026393.1 |  |
| Pop4           | 1039  | 1.32 | 0.18 | NM_025390   |  |
| LOC382630      | 56    | 1.32 | 0.41 | XM_356598.1 |  |
| Sema6b         | 348   | 1.32 | 0.06 | NM_013662.1 |  |
| Rnf7           | 5604  | 1.32 | 0.28 | XM_135065.1 |  |
| 2700087H15Rik  | 2636  | 1.31 | 0.29 | NM_027422.1 |  |
| Tal1           | 52    | 1.31 | 0.43 | NM_011527.1 |  |
| Smox           | 211   | 1.31 | 0.30 | NM_145533.1 |  |
| 9230101K24Rik  | 768   | 1.31 | 0.38 | NM_177206   |  |
| Nfatc2ip       | 422   | 1.31 | 0.11 | NM_010900   |  |
| 1110049F12Rik  | 1630  | 1.31 | 0.49 | NM_025411.2 |  |
| Ppa1           | 7807  | 1.31 | 0.32 |             |  |
| Xkh            | 131   | 1.31 | 0.33 | NM_023500.1 |  |
| 1700028I04Rik  | 62    | 1.31 | 0.20 | AK006460    |  |
| Stard3nl       | 317   | 1.31 | 0.59 | NM_024270.1 |  |
| Srp68          | 392   | 1.31 | 0.33 | NM_146032.2 |  |
| Trfr2          | 52    | 1.31 | 0.30 | NM_015799.2 |  |
| Supt3h         | 2503  | 1.31 | 0.11 | NM_178652.1 |  |
| 2700055K07Rik  | 283   | 1.31 | 0.21 | NM_026481.2 |  |
| Whsc111        | 1554  | 1.31 | 0.09 | XM_284391.2 |  |
| Bahd1          | 1777  | 1.31 | 0.35 |             |  |
| Capns1         | 3212  | 1.31 | 0.47 | NM_009795   |  |
| 9626100_224_rc | 1087  | 1.31 | 0.26 |             |  |
| Rit1           | 1371  | 1.31 | 0.23 | NM_009069   |  |
| B930008A12Rik  | 69    | 1.31 | 0.68 | AK046962    |  |
| 1810064F22Rik  | 28746 | 1.31 | 0.04 |             |  |
| Gcs1           | 2279  | 1.31 | 0.04 | NM_020619.2 |  |
| Rnf31          | 119   | 1.31 | 0.38 | NM_194346.2 |  |
| Klhl18         | 83    | 1.31 | 0.67 | NM_177771.2 |  |
| D14Ert449e     | 430   | 1.31 | 0.21 | NM_025311.1 |  |
| LOC218482      | 1100  | 1.31 | 0.16 | XM_127488.3 |  |
| H2-Q5          | 589   | 1.31 | 0.41 | NM_010393.1 |  |
| 2810468N07Rik  | 65    | 1.31 | 0.43 |             |  |
| Soft           | 242   | 1.31 | 0.25 | NM_021790.1 |  |
| 5330430P07Rik  | 1062  | 1.31 | 0.29 | AK030554    |  |
| Pex19          | 806   | 1.31 | 0.21 | NM_023041.2 |  |
| 1810073P09Rik  | 230   | 1.31 | 0.44 | XM_127323.4 |  |
| 2310046O06Rik  | 55    | 1.31 | 0.35 | NM_175273.2 |  |
| 9930004G02Rik  | 34    | 1.31 | 0.91 | AK036769    |  |
| H2afz          | 11408 | 1.31 | 0.26 | NM_016750.1 |  |
| Tera-pending   | 721   | 1.31 | 0.20 | XM_125257.1 |  |
| mtDNA_ND1      | 70457 | 1.31 | 0.29 |             |  |
| 1110036O03Rik  | 649   | 1.31 | 0.40 | NM_176830.2 |  |
| 4833431D13Rik  | 65    | 1.31 | 0.34 | XM_196000.3 |  |
| Commd10        | 1033  | 1.31 | 0.36 | NM_178377.3 |  |
| Stk6           | 2808  | 1.31 | 0.12 | NM_011497.2 |  |

|               |       |      |      |             |  |
|---------------|-------|------|------|-------------|--|
| Tmem43        | 2383  | 1.31 | 0.23 |             |  |
| Med18         | 963   | 1.31 | 0.09 |             |  |
| D330027H18Rik | 144   | 1.31 | 0.18 | XM_149840.2 |  |
| 0610040B10Rik | 109   | 1.31 | 0.25 | XM_489113   |  |
| 1110001A07Rik | 368   | 1.31 | 0.05 | NM_025377.1 |  |
| 4931426K16Rik | 424   | 1.31 | 0.30 | XM_357260   |  |
| 1700042G07Rik | 40    | 1.31 | 0.65 | XM_149454.1 |  |
| LOC384943     | 193   | 1.31 | 0.33 | XM_357953.1 |  |
| Hmgn1         | 6868  | 1.31 | 0.27 | NM_008251   |  |
| Ech1          | 2597  | 1.31 | 0.41 | NM_016772.1 |  |
| Gmn           | 48    | 1.31 | 0.80 | NM_020567.1 |  |
| Mrps5         | 1146  | 1.31 | 0.19 | NM_029963   |  |
| F630025I20Rik | 636   | 1.31 | 0.79 |             |  |
| Slc44a4       | 250   | 1.31 | 0.21 |             |  |
| Acd           | 2372  | 1.31 | 0.04 |             |  |
| Pofut2        | 493   | 1.31 | 0.37 | NM_030262.2 |  |
| Copg          | 1301  | 1.31 | 0.13 | NM_017477.1 |  |
| Nsun5         | 357   | 1.31 | 0.13 |             |  |
| 0710008K08Rik | 2076  | 1.31 | 0.23 | NM_026995.1 |  |
| Cstf1         | 4050  | 1.31 | 0.15 | NM_024199.1 |  |
| 2600001G24Rik | 47    | 1.31 | 0.48 | AK011135    |  |
| LOC624855     | 84    | 1.31 | 0.48 |             |  |
| Ccnh          | 582   | 1.31 | 0.10 | NM_023243.2 |  |
| Ier3ip1       | 3972  | 1.31 | 0.19 |             |  |
| Mlf2          | 7175  | 1.31 | 0.33 | NM_145385.1 |  |
| U2af2         | 198   | 1.31 | 0.57 | NM_133671.1 |  |
| Ccne1         | 698   | 1.31 | 0.47 | NM_007633   |  |
| 2200005K02Rik | 85    | 1.31 | 0.55 | AK008639    |  |
| Scara3        | 3310  | 1.31 | 0.21 | NM_172604.1 |  |
| Bat5          | 1733  | 1.31 | 0.25 | NM_178592.2 |  |
| Purb          | 341   | 1.31 | 0.50 | NM_011221.1 |  |
| Eef1g         | 13122 | 1.31 | 0.12 | NM_026007   |  |
| Hmgb2         | 996   | 1.31 | 0.18 | NM_008252.2 |  |
| 6720406L13Rik | 160   | 1.31 | 0.32 | AK078395    |  |
| 4930550G17Rik | 52    | 1.31 | 0.23 | AK050748    |  |
| 2310065K24Rik | 1727  | 1.31 | 0.13 | NM_028221.2 |  |
| Uprt          | 46    | 1.31 | 0.20 |             |  |
| Stard10       | 888   | 1.31 | 0.39 | NM_019990.1 |  |
| Myg1          | 1593  | 1.31 | 0.23 | NM_021713.1 |  |
| Bscl2         | 8277  | 1.31 | 0.18 | NM_008144.3 |  |
| Cyba          | 63    | 1.31 | 0.26 | NM_007806.1 |  |
| Rdbp          | 3061  | 1.31 | 0.40 | NM_138580.1 |  |
| Sdad1         | 1855  | 1.31 | 0.10 | NM_172713.1 |  |
| Kif12         | 47    | 1.31 | 0.16 | NM_010616.1 |  |
| Nob1          | 686   | 1.31 | 0.21 |             |  |
| 4732465J04Rik | 96    | 1.31 | 0.58 | AK076359    |  |
| 4833438C02Rik | 84    | 1.31 | 0.77 |             |  |
| LOC56628      | 4923  | 1.31 | 0.25 | NM_019909.1 |  |
| Centg2        | 882   | 1.31 | 0.38 | NM_178119.2 |  |
| Porcn         | 81    | 1.31 | 0.54 | NM_016913.1 |  |
| 1190007I07Rik | 157   | 1.31 | 0.03 | AK004515    |  |
| Gmns          | 1721  | 1.31 | 0.22 | NM_146041.1 |  |
| En1           | 447   | 1.31 | 0.28 | NM_010133   |  |
| Uck1          | 572   | 1.31 | 0.10 | NM_011675.1 |  |
| LOC333315     | 47    | 1.31 | 0.44 | XM_286119.2 |  |
| Dcps          | 1048  | 1.31 | 0.38 |             |  |
| 3230401I01Rik | 404   | 1.31 | 0.37 | NM_026140.2 |  |
| Spryd4        | 714   | 1.31 | 0.14 |             |  |
| B230386D16Rik | 293   | 1.31 | 0.26 | AK046451    |  |
| Ube1l         | 89    | 1.31 | 0.89 | NM_023738.2 |  |
| AA408556      | 4115  | 1.31 | 0.43 | NM_199447.2 |  |
| 4933432P15Rik | 167   | 1.31 | 0.07 | NM_175164.2 |  |
| Pigq          | 828   | 1.31 | 0.30 | NM_011822.2 |  |
| Tmem53        | 237   | 1.31 | 0.15 |             |  |
| D030018L15Rik | 81    | 1.31 | 0.44 |             |  |
| Ahnak         | 60    | 1.31 | 0.41 |             |  |
| Agpat4        | 1593  | 1.31 | 0.60 | NM_026644.1 |  |
| Gpr135        | 304   | 1.31 | 0.04 | NM_181752.1 |  |

|                  |       |      |      |             |  |
|------------------|-------|------|------|-------------|--|
| Vps52            | 81    | 1.31 | 0.45 | XM_110209.3 |  |
| Slc25a39         | 1214  | 1.31 | 0.52 |             |  |
| Ddx48            | 6044  | 1.31 | 0.39 | NM_138669.1 |  |
| D7Wsu128e        | 390   | 1.31 | 0.29 | NM_138589   |  |
| Olfir593         | 64    | 1.31 | 0.57 | NM_146380.1 |  |
| Fbxo44           | 449   | 1.31 | 0.13 | NM_173401.1 |  |
| Acat2            | 330   | 1.31 | 0.39 | NM_009338   |  |
| 8430426K15Rik    | 239   | 1.31 | 0.17 |             |  |
| Psmc3            | 2449  | 1.31 | 0.51 | NM_008948.1 |  |
| Tor2a            | 146   | 1.30 | 0.56 | AK019246    |  |
| Zbtb2            | 475   | 1.30 | 0.05 |             |  |
| Ifngr1           | 567   | 1.30 | 0.20 | NM_010511.1 |  |
| Pnp              | 348   | 1.30 | 0.29 | AK008143    |  |
| 5730585A16Rik    | 37    | 1.30 | 0.89 |             |  |
| A930025A13Rik    | 51    | 1.30 | 0.64 | NM_177196.2 |  |
| LOC382063        | 14033 | 1.30 | 0.25 | XM_356143.1 |  |
| Rabggta          | 398   | 1.30 | 0.13 | NM_019519.1 |  |
| Pex11b           | 1016  | 1.30 | 0.06 | NM_011069.2 |  |
| Arhgef18         | 620   | 1.30 | 0.31 | NM_133962.3 |  |
| scl000710.1_2295 | 49    | 1.30 | 0.42 |             |  |
| 2900045G02Rik    | 163   | 1.30 | 0.22 | AK013646    |  |
| D130027A21Rik    | 683   | 1.30 | 0.09 | AK051268    |  |
| Rab14            | 2651  | 1.30 | 0.18 | AK013410    |  |
| 2900037O03Rik    | 673   | 1.30 | 0.54 |             |  |
| Dph2             | 2020  | 1.30 | 0.20 |             |  |
| D15Mit260        | 337   | 1.30 | 0.14 | XM_354923.1 |  |
| Kcnj10           | 48    | 1.30 | 0.39 | NM_020269.3 |  |
| Selenbp2         | 1114  | 1.30 | 0.30 | NM_019414   |  |
| Lypla2           | 21937 | 1.30 | 0.14 | NM_011942.1 |  |
| Sult2b1          | 567   | 1.30 | 0.61 | NM_017465.1 |  |
| Hdgrp2           | 3978  | 1.30 | 0.12 | NM_008233.1 |  |
| Bxdc2            | 8907  | 1.30 | 0.23 |             |  |
| Lhx5             | 333   | 1.30 | 0.45 | NM_008499.2 |  |
| Arhgef19         | 368   | 1.30 | 0.29 | NM_172520.1 |  |
| Cidea            | 550   | 1.30 | 0.38 | NM_007702.1 |  |
| EG668668         | 31214 | 1.30 | 0.42 |             |  |
| Prss25           | 831   | 1.30 | 0.19 | NM_019752.2 |  |
| Suox             | 171   | 1.30 | 0.20 | NM_173733.2 |  |
| 4930527D15Rik    | 1187  | 1.30 | 0.23 | NM_026350.1 |  |
| Sumo2            | 6978  | 1.30 | 0.18 | NM_133354   |  |
| 9830148G24Rik    | 397   | 1.30 | 0.29 | AK036671    |  |
| 5730594E01Rik    | 253   | 1.30 | 0.18 | AK077748    |  |
| Nmt1             | 11143 | 1.30 | 0.26 | NM_008707.2 |  |
| Cebpb            | 5026  | 1.30 | 0.66 | NM_009883.1 |  |
| Ppapdc3          | 67    | 1.30 | 0.39 |             |  |
| Rbm19            | 935   | 1.30 | 0.14 | NM_028762.1 |  |
| LOC233771        | 79    | 1.30 | 0.18 | XM_150006.2 |  |
| Cops8            | 1894  | 1.30 | 0.25 | NM_133805.2 |  |
| 8430408G22Rik    | 66    | 1.30 | 0.12 | NM_145980.1 |  |
| Zfp692           | 443   | 1.30 | 0.36 |             |  |
| 1810043G02Rik    | 236   | 1.30 | 0.26 | NM_026431   |  |
| S100a4           | 49    | 1.30 | 0.72 | NM_011311.1 |  |
| 2310061I09Rik    | 1203  | 1.30 | 0.55 | XM_129811.2 |  |
| Grina            | 13057 | 1.30 | 0.23 | NM_023168.2 |  |
| 4631423F02Rik    | 40    | 1.30 | 0.34 | XM_129928.2 |  |
| Ahrr             | 53    | 1.30 | 0.66 | NM_009644.1 |  |
| Pcbp1            | 9777  | 1.30 | 0.35 | NM_011865.2 |  |
| Galnt9           | 942   | 1.30 | 0.16 | NM_198306   |  |
| Btn1a1           | 40    | 1.30 | 0.35 | NM_013483.1 |  |
| Bard1            | 118   | 1.30 | 0.23 | NM_007525.1 |  |
| BC024683         | 189   | 1.30 | 0.21 | XM_130930   |  |
| 2310020H20Rik    | 4743  | 1.30 | 0.38 | NM_025526.1 |  |
| LOC380712        | 47    | 1.30 | 0.18 | XM_354627.1 |  |
| Atp6v1c2         | 436   | 1.30 | 0.08 | NM_133699   |  |
| Ppm1m            | 364   | 1.30 | 0.42 |             |  |
| Mrgprg           | 94    | 1.30 | 0.20 | NM_203492.1 |  |
| Uba52            | 53666 | 1.30 | 0.03 | NM_019883   |  |
| Hes1             | 645   | 1.30 | 0.37 | NM_008235.2 |  |

|                 |       |      |      |             |  |
|-----------------|-------|------|------|-------------|--|
| 2310009N05Rik   | 1541  | 1.30 | 0.20 | NM_025861.1 |  |
| Tbx1            | 378   | 1.30 | 0.28 | XM_148338.1 |  |
| Tap1            | 96    | 1.30 | 0.36 | NM_013683.1 |  |
| Blmh            | 393   | 1.30 | 0.21 | NM_178645.1 |  |
| 4732497O03Rik   | 446   | 1.30 | 0.22 | NM_144826.2 |  |
| Psmc9           | 400   | 1.30 | 0.24 | NM_026000.1 |  |
| Olfr1043        | 43    | 1.30 | 0.22 |             |  |
| Dullard         | 1315  | 1.30 | 0.48 | NM_026017.1 |  |
| C130036G08      | 7634  | 1.30 | 0.05 | NM_177735.3 |  |
| BC022224        | 413   | 1.30 | 0.67 | NM_177564.2 |  |
| Dhdh2           | 1072  | 1.30 | 0.42 | XM_356065   |  |
| Ostf1           | 1815  | 1.30 | 0.20 | NM_017375.1 |  |
| 2310042L06Rik   | 899   | 1.30 | 0.10 | NM_172428.1 |  |
| A830007N09Rik   | 86    | 1.30 | 0.17 | AK080591    |  |
| Spats1          | 450   | 1.30 | 0.50 | NM_027649.1 |  |
| LOC331511       | 221   | 1.30 | 0.01 | XM_284737.2 |  |
| AW060232        | 1980  | 1.30 | 0.12 | XM_355639   |  |
| Sec22c          | 394   | 1.30 | 0.25 |             |  |
| D1Ert396e       | 498   | 1.30 | 0.39 | NM_021421   |  |
| Cldn4           | 167   | 1.30 | 0.21 | NM_009903.1 |  |
| 1190006E07Rik   | 50    | 1.30 | 0.24 | NM_026879.1 |  |
| Prdx5           | 3443  | 1.30 | 0.44 | NM_012021.1 |  |
| scl000292.1_12  | 559   | 1.30 | 0.26 |             |  |
| 1110006I15Rik   | 5033  | 1.30 | 0.10 | NM_134142.1 |  |
| 2410018C17Rik   | 6576  | 1.30 | 0.22 | NM_178390.2 |  |
| Igf2bp2         | 1899  | 1.30 | 0.33 |             |  |
| 2210038L17Rik   | 39    | 1.30 | 0.57 |             |  |
| D15Wsu169e      | 225   | 1.30 | 0.36 | NM_198420.1 |  |
| Zfp326          | 719   | 1.30 | 0.38 | NM_018759.1 |  |
| 1110017F19Rik   | 59    | 1.30 | 0.52 |             |  |
| Smad1           | 2145  | 1.29 | 0.58 | NM_028534.1 |  |
| 2810441C07Rik   | 39    | 1.29 | 0.58 | NM_172415.2 |  |
| Nosip           | 302   | 1.29 | 0.44 | NM_025533.1 |  |
| Rnut1           | 436   | 1.29 | 0.29 | NM_178374.2 |  |
| B230208H17Rik   | 790   | 1.29 | 0.56 | XM_130148.1 |  |
| Hmgn3           | 6125  | 1.29 | 0.29 | NM_175074.1 |  |
| 6530406A20Rik   | 116   | 1.29 | 0.68 |             |  |
| Aadacl1         | 2285  | 1.29 | 0.07 |             |  |
| Supv3l1         | 1532  | 1.29 | 0.25 | NM_181423.2 |  |
| E030016N13Rik   | 293   | 1.29 | 0.21 | AK086974    |  |
| 1500005A01Rik   | 254   | 1.29 | 0.28 | NM_033146.1 |  |
| Lin7b           | 61    | 1.29 | 0.09 | NM_011698.1 |  |
| Rpl19           | 38915 | 1.29 | 0.22 | NM_009078   |  |
| scl0004151.1_11 | 311   | 1.29 | 0.30 |             |  |
| Srprb           | 788   | 1.29 | 0.59 | NM_009275.2 |  |
| D10Wsu102e      | 534   | 1.29 | 0.13 | NM_026579.2 |  |
| Mcoln1          | 159   | 1.29 | 0.25 | NM_053177.1 |  |
| 2410104I19Rik   | 8702  | 1.29 | 0.39 | NM_133691.1 |  |
| Lym5            | 622   | 1.29 | 0.22 |             |  |
| Lamc1           | 632   | 1.29 | 0.12 | NM_010683   |  |
| Gba             | 1908  | 1.29 | 0.13 | NM_008094.3 |  |
| Cno             | 486   | 1.29 | 0.24 | NM_133724.2 |  |
| 3110056O03Rik   | 1601  | 1.29 | 0.26 | NM_175195.2 |  |
| LOC386205       | 81    | 1.29 | 0.38 | XM_359118.1 |  |
| Zbtb9           | 155   | 1.29 | 0.04 |             |  |
| Ehd1            | 120   | 1.29 | 0.40 | NM_010119.3 |  |
| Snx15           | 647   | 1.29 | 0.45 | NM_026912.1 |  |
| 2900092C05Rik   | 42    | 1.29 | 0.26 | NM_028434.1 |  |
| Snx17           | 2216  | 1.29 | 0.15 | NM_153680.1 |  |
| LOC232937       | 112   | 1.29 | 0.22 | XM_133238.1 |  |
| Stx16           | 66    | 1.29 | 0.32 | NM_172675.1 |  |
| Gtf2h4          | 894   | 1.29 | 0.10 | NM_010364.1 |  |
| Psmc1           | 3011  | 1.29 | 0.23 | NM_008947   |  |
| Il18bp          | 155   | 1.29 | 0.37 | NM_010531.1 |  |
| Twist1          | 326   | 1.29 | 0.34 | NM_011658.1 |  |
| AU022252        | 954   | 1.29 | 0.38 |             |  |
| Sgta            | 263   | 1.29 | 0.02 | NM_024499.1 |  |
| D5Bwg0834e      | 2307  | 1.29 | 0.18 | NM_144819   |  |

|                  |       |      |      |              |  |
|------------------|-------|------|------|--------------|--|
| Furin            | 1257  | 1.29 | 0.67 | NM_011046.1  |  |
| 2310020H19Rik    | 4385  | 1.29 | 0.57 | NM_025525    |  |
| 9430043O10Rik    | 175   | 1.29 | 0.46 | AK034826     |  |
| Stx6             | 350   | 1.29 | 0.17 | NM_021433.2  |  |
| Gtf3a            | 2738  | 1.29 | 0.37 | NM_025652.1  |  |
| Plod3            | 3429  | 1.29 | 0.12 | NM_011962.2  |  |
| D2Bwg1423e       | 512   | 1.29 | 0.43 |              |  |
| Mrpl37           | 1616  | 1.29 | 0.42 | NM_025500.1  |  |
| 3222401M22Rik    | 42    | 1.29 | 0.65 | XM_129814.4  |  |
| 1700013A01Rik    | 680   | 1.29 | 0.28 | AK005934     |  |
| 2500002K03Rik    | 238   | 1.29 | 0.31 | NM_172733.1  |  |
| 1110032N12Rik    | 2908  | 1.29 | 0.05 | NM_026824.2  |  |
| Mett11d1         | 277   | 1.29 | 0.29 |              |  |
| Cdca5            | 258   | 1.29 | 0.34 | NM_026410.1  |  |
| Ebna1bp2         | 965   | 1.29 | 0.44 | NM_026932.2  |  |
| LOC383872        | 71    | 1.29 | 0.22 | XM_357303.1  |  |
| 5930412G12Rik    | 297   | 1.29 | 0.10 |              |  |
| Dlgap4           | 100   | 1.29 | 0.49 | NM_146128    |  |
| Arbp             | 394   | 1.29 | 0.33 | NM_007475.2  |  |
| B130053I10Rik    | 3478  | 1.29 | 0.26 | AK045266     |  |
| Cdca4            | 1877  | 1.29 | 0.14 | NM_028023.3  |  |
| Sec14I2          | 78    | 1.29 | 0.14 | NM_144520.1  |  |
| Kctd15           | 682   | 1.29 | 0.35 | NM_146188.1  |  |
| Ccl25            | 258   | 1.29 | 0.06 | NM_009138.1  |  |
| D6Wsu116e        | 62    | 1.29 | 0.38 | NM_026585.1  |  |
| Eif2b2           | 1588  | 1.29 | 0.31 | NM_145445.2  |  |
| Atoh8            | 53    | 1.29 | 0.86 | NM_153778.2  |  |
| Apod             | 54    | 1.29 | 0.73 | NM_007470.1  |  |
| Cd9              | 2743  | 1.29 | 0.22 | NM_007657.2  |  |
| 1010001D01Rik    | 42    | 1.29 | 0.22 | NM_133186.1  |  |
| Irf3             | 2029  | 1.29 | 0.13 | NM_016849.2  |  |
| 2310022K01Rik    | 359   | 1.29 | 0.15 | AK009476     |  |
| 1110034A24Rik    | 501   | 1.29 | 0.10 | NM_027269.2  |  |
| 4732467B22       | 294   | 1.29 | 0.14 | NM_177822.2  |  |
| 2010007L18Rik    | 155   | 1.29 | 0.47 | XM_134478.2  |  |
| St14             | 409   | 1.29 | 0.15 | NM_011176.3  |  |
| Sumo1            | 7671  | 1.29 | 0.14 | NM_009460    |  |
| Abhd8            | 922   | 1.29 | 0.37 | NM_022419.1  |  |
| Zdhhc16          | 792   | 1.29 | 0.20 | NM_023740    |  |
| Gfod1            | 174   | 1.29 | 0.21 |              |  |
| 2400001E08Rik    | 1254  | 1.29 | 0.46 | NM_025605.1  |  |
| Arid5a           | 131   | 1.29 | 0.25 | NM_145996    |  |
| Ddost            | 4007  | 1.29 | 0.19 | NM_007838.2  |  |
| LOC114601        | 137   | 1.29 | 0.47 | NM_053252.1  |  |
| LOC385647        | 85    | 1.29 | 0.05 | XM_358838.1  |  |
| Sif1             | 55978 | 1.29 | 0.07 |              |  |
| G430008M12Rik    | 49    | 1.29 | 0.07 | AK089939     |  |
| Trpt1            | 216   | 1.29 | 0.36 |              |  |
| 3110054C06Rik    | 2004  | 1.29 | 0.22 |              |  |
| 2310037P21Rik    | 111   | 1.29 | 0.32 | NM_001002267 |  |
| 6230401O10Rik    | 94    | 1.29 | 0.84 | XM_133159.4  |  |
| Olfir550         | 54    | 1.29 | 0.64 | NM_147104.1  |  |
| scl000025.1_30_F | 57    | 1.29 | 0.56 |              |  |
| BC037651         | 441   | 1.29 | 0.22 | NM_173741.2  |  |
| Ncbp2            | 746   | 1.29 | 0.19 | NM_026554.2  |  |
| Psmc2            | 11324 | 1.29 | 0.12 | NM_011188.1  |  |
| Slc9a3r2         | 193   | 1.29 | 0.40 | NM_023055    |  |
| 1810047K05Rik    | 70    | 1.29 | 0.46 | AK007812     |  |
| AL024069         | 168   | 1.29 | 0.20 | XM_129912.3  |  |
| 2810037C03Rik    | 3497  | 1.29 | 0.39 | NM_024240.3  |  |
| Exosc4           | 1479  | 1.29 | 0.10 | NM_175399.2  |  |
| Dhx9             | 110   | 1.29 | 0.22 | NM_007842.1  |  |
| Pak4             | 2038  | 1.29 | 0.10 | NM_027470.2  |  |
| 6330437B22Rik    | 553   | 1.29 | 0.18 | AK031868     |  |
| IGKV4-62_AJ2312  | 44    | 1.29 | 0.19 |              |  |
| Dhx16            | 94    | 1.29 | 0.36 | NM_026987.1  |  |
| 9130221H12Rik    | 394   | 1.29 | 0.15 | XM_149899.1  |  |
| LOC270599        | 39    | 1.29 | 0.16 | XM_195205.3  |  |

|               |       |      |      |             |  |
|---------------|-------|------|------|-------------|--|
| B230217C12Rik | 78    | 1.29 | 0.63 | AK035650    |  |
| Nol1          | 783   | 1.29 | 0.22 | NM_138747.1 |  |
| Zfyve20       | 835   | 1.29 | 0.31 | NM_030081.2 |  |
| Slc39a1       | 48    | 1.29 | 0.37 | NM_013901   |  |
| Tmem81        | 151   | 1.28 | 0.21 |             |  |
| Mum1          | 4696  | 1.28 | 0.10 | NM_023431.3 |  |
| OTTMUSG000000 | 215   | 1.28 | 0.31 |             |  |
| Arhgap17      | 393   | 1.28 | 0.13 | NM_144529.1 |  |
| Gemin6        | 506   | 1.28 | 0.22 | NM_026053   |  |
| D530018J11Rik | 56    | 1.28 | 0.48 | AK085212    |  |
| Prdx2         | 3122  | 1.28 | 0.34 | NM_011563   |  |
| Pold4         | 338   | 1.28 | 0.35 | NM_027196   |  |
| Hars2         | 603   | 1.28 | 0.45 | NM_025314.1 |  |
| 2310040G24Rik | 86    | 1.28 | 0.67 | XM_149767.1 |  |
| 5430440L12Rik | 349   | 1.28 | 0.28 |             |  |
| 2010111I01Rik | 470   | 1.28 | 0.36 | XM_127387.4 |  |
| 1110062M06Rik | 306   | 1.28 | 0.17 |             |  |
| Rassf1        | 1356  | 1.28 | 0.26 | NM_019713.2 |  |
| 8430411H09Rik | 148   | 1.28 | 0.29 | NM_027805.1 |  |
| 4432406C05Rik | 312   | 1.28 | 0.17 | NM_025708.1 |  |
| 2810405J23Rik | 291   | 1.28 | 0.24 | AK012998    |  |
| Atp13a1       | 2860  | 1.28 | 0.32 |             |  |
| C330049H01Rik | 2542  | 1.28 | 0.14 | AK021230    |  |
| Taf11         | 351   | 1.28 | 0.23 | NM_026836.1 |  |
| 3110005G23Rik | 1008  | 1.28 | 0.65 |             |  |
| A130049L09Rik | 76    | 1.28 | 0.42 |             |  |
| D10Ert641e    | 3447  | 1.28 | 0.20 | NM_025514.1 |  |
| Stoml2        | 107   | 1.28 | 0.35 | NM_023231.2 |  |
| 4931431L11Rik | 1119  | 1.28 | 0.16 | XM_485553   |  |
| Trp53         | 371   | 1.28 | 0.40 | NM_011640.1 |  |
| Dusp7         | 739   | 1.28 | 0.13 | NM_153459.1 |  |
| Zfp259        | 2588  | 1.28 | 0.16 | NM_011752.1 |  |
| Ndufv1        | 10502 | 1.28 | 0.32 | NM_133666.1 |  |
| Ehd3          | 209   | 1.28 | 0.31 | NM_020578.1 |  |
| 2310011J03Rik | 360   | 1.28 | 0.36 | NM_025521.2 |  |
| Al662250      | 638   | 1.28 | 0.38 | NM_178926.2 |  |
| Supt5h        | 2507  | 1.28 | 0.40 | NM_013676.1 |  |
| 2810418N01Rik | 740   | 1.28 | 0.38 | XM_130416.3 |  |
| 0610031J06Rik | 1218  | 1.28 | 0.32 | NM_020003.1 |  |
| Pelp1         | 400   | 1.28 | 0.17 |             |  |
| Bace2         | 168   | 1.28 | 0.47 | NM_019517.2 |  |
| Np15          | 53    | 1.28 | 0.72 | NM_019435.2 |  |
| A830080H07Rik | 1015  | 1.28 | 0.21 |             |  |
| Ninj2         | 42    | 1.28 | 0.37 | NM_016718.1 |  |
| ldh2          | 3523  | 1.28 | 0.18 | NM_173011.1 |  |
| Tsn           | 280   | 1.28 | 0.19 | AK011220    |  |
| D130049O21Rik | 1037  | 1.28 | 0.14 | NM_198632.1 |  |
| Cgn           | 219   | 1.28 | 0.26 | XM_131052.4 |  |
| Nadsyn1       | 87    | 1.28 | 0.10 |             |  |
| LOC245668     | 320   | 1.28 | 0.11 | XM_142236.4 |  |
| Usp18         | 695   | 1.28 | 0.04 | NM_011909.1 |  |
| Abcc5         | 213   | 1.28 | 0.13 | NM_013790   |  |
| Klk11         | 1405  | 1.28 | 0.47 | NM_010640.1 |  |
| Sh3gl1        | 493   | 1.28 | 0.04 | NM_013664.1 |  |
| 2810423O19Rik | 1149  | 1.28 | 0.04 | NM_198931.1 |  |
| Fbxo31        | 586   | 1.28 | 0.27 | NM_133765.2 |  |
| Rft1          | 62    | 1.28 | 0.11 |             |  |
| Hdac5         | 1053  | 1.28 | 0.25 | NM_010412.2 |  |
| Rshl2         | 708   | 1.28 | 0.26 | NM_025789.2 |  |
| Siat9         | 373   | 1.28 | 0.19 | NM_011375.1 |  |
| Mif4gd        | 358   | 1.28 | 0.03 |             |  |
| LOC547343     | 578   | 1.28 | 0.15 |             |  |
| 5730494M16Rik | 234   | 1.28 | 0.06 | XM_203706.2 |  |
| Spock2        | 561   | 1.28 | 0.50 | NM_052994.2 |  |
| 4933417E08Rik | 344   | 1.28 | 0.08 | AK077171    |  |
| A730032D07Rik | 1852  | 1.28 | 0.27 | XM_194983.2 |  |
| LOC227393     | 516   | 1.28 | 0.30 | XM_129965.3 |  |
| 1500001L03Rik | 335   | 1.28 | 0.22 | AK005096    |  |



|                 |       |      |      |             |  |
|-----------------|-------|------|------|-------------|--|
| LOC382016       | 3440  | 1.28 | 0.08 | XM_356085.1 |  |
| LOC383439       | 68    | 1.28 | 0.28 | XM_357056.1 |  |
| 5630401D06Rik   | 1870  | 1.28 | 0.30 |             |  |
| 1810063P04Rik   | 316   | 1.28 | 0.31 | NM_024440.1 |  |
| AA409316        | 351   | 1.28 | 0.23 | NM_134087.1 |  |
| AI987944        | 81    | 1.28 | 0.31 | NM_183167.1 |  |
| 5730528L13Rik   | 702   | 1.28 | 0.28 | NM_028137.1 |  |
| Wdr8            | 470   | 1.28 | 0.30 | NM_021499.1 |  |
| 9830107H15Rik   | 37    | 1.28 | 0.68 | AK036432    |  |
| Mylpf           | 114   | 1.28 | 0.21 | NM_016754.3 |  |
| Lrp10           | 9488  | 1.28 | 0.07 | NM_022993.2 |  |
| Lrrc59          | 4317  | 1.28 | 0.24 |             |  |
| Ilvbl           | 509   | 1.28 | 0.12 | BC056459    |  |
| Aup1            | 1278  | 1.28 | 0.43 | NM_007517   |  |
| Ddx25           | 1704  | 1.28 | 0.39 | NM_013932.2 |  |
| Qrsl1           | 3335  | 1.28 | 0.06 | XM_125586.2 |  |
| Fhl1            | 3076  | 1.28 | 0.23 | NM_010211.1 |  |
| Tlcd1           | 372   | 1.28 | 0.10 |             |  |
| LOC216375       | 51    | 1.28 | 0.50 | XM_147455.1 |  |
| EG546166        | 64    | 1.28 | 0.25 |             |  |
| Gm773           | 4249  | 1.28 | 0.22 |             |  |
| Prom1           | 43    | 1.28 | 0.33 | NM_008935   |  |
| E130012A19Rik   | 710   | 1.28 | 0.31 | NM_175332.2 |  |
| LOC381038       | 3471  | 1.28 | 0.25 | XM_354952.1 |  |
| Gcdh            | 213   | 1.28 | 0.28 | NM_008097.1 |  |
| Cog3            | 178   | 1.28 | 0.10 | NM_177381   |  |
| Nefm            | 1284  | 1.28 | 0.23 |             |  |
| AI790205        | 609   | 1.28 | 0.27 | NM_178760.2 |  |
| 4.93343E+26     | 97    | 1.28 | 0.07 |             |  |
| Tmem108         | 998   | 1.28 | 0.39 |             |  |
| H2afj           | 1051  | 1.28 | 0.25 |             |  |
| Sfpq            | 5528  | 1.28 | 0.12 | NM_023603.1 |  |
| Ppid            | 9827  | 1.28 | 0.09 | NM_026352.2 |  |
| 3010003L21Rik   | 589   | 1.28 | 0.16 | NM_175404.2 |  |
| 1700020C11Rik   | 78    | 1.28 | 0.14 | NM_026443.2 |  |
| BC003885        | 1965  | 1.28 | 0.26 | NM_198609   |  |
| LOC381889       | 355   | 1.28 | 0.69 | XM_358671.1 |  |
| Xrcc2           | 154   | 1.28 | 0.09 | AK085093    |  |
| Laptm4a         | 2276  | 1.28 | 0.42 | NM_008640.1 |  |
| Arv1            | 404   | 1.28 | 0.13 |             |  |
| A130038H09Rik   | 51    | 1.28 | 0.19 |             |  |
| 6230424B18Rik   | 49    | 1.28 | 0.61 | AK020089    |  |
| Sgne1           | 3934  | 1.28 | 0.42 | NM_009162.2 |  |
| 5430428G01Rik   | 1365  | 1.28 | 0.60 | NM_024178.1 |  |
| B130038J23Rik   | 47    | 1.28 | 0.55 | AK045128    |  |
| AI595366        | 48    | 1.27 | 0.18 |             |  |
| Cdh1            | 35    | 1.27 | 0.59 | NM_009864.1 |  |
| Dscr1l2         | 2454  | 1.27 | 0.27 | NM_022980.2 |  |
| Atp1b1          | 12595 | 1.27 | 0.14 | NM_009721.2 |  |
| 2810003O05Rik   | 57    | 1.27 | 0.35 | AK053297    |  |
| Rela            | 2503  | 1.27 | 0.13 | NM_009045.2 |  |
| 6820416H03Rik   | 185   | 1.27 | 0.37 | AK078494    |  |
| LOC278188       | 75    | 1.27 | 0.39 | XM_204410.2 |  |
| 2410008J05Rik   | 693   | 1.27 | 0.78 | NM_153776.1 |  |
| Gpr172b         | 397   | 1.27 | 0.19 | NM_029643.2 |  |
| Shf             | 447   | 1.27 | 0.16 |             |  |
| scl0003389.1_16 | 291   | 1.27 | 0.22 |             |  |
| Tex261          | 1791  | 1.27 | 0.10 | NM_009357.1 |  |
| 2810430B18Rik   | 171   | 1.27 | 0.26 | AK013201    |  |
| Rad9b           | 355   | 1.27 | 0.23 | NM_144912.1 |  |
| Stk11           | 1121  | 1.27 | 0.19 | NM_011492.1 |  |
| Ei24            | 1789  | 1.27 | 0.12 | NM_007915   |  |
| Dguok           | 496   | 1.27 | 0.25 | NM_013764.1 |  |
| LOC236954       | 78    | 1.27 | 0.35 | XM_142052.1 |  |
| D330008I21Rik   | 402   | 1.27 | 0.22 | AK052205    |  |
| 2610024G14Rik   | 3551  | 1.27 | 0.19 | NM_019836   |  |
| LOC223594       | 4468  | 1.27 | 0.02 | XM_128085.2 |  |
| Mif1            | 528   | 1.27 | 0.52 | NM_010801.1 |  |

|               |       |      |      |             |  |
|---------------|-------|------|------|-------------|--|
| Pwvp2         | 150   | 1.27 | 0.22 | XM_133936   |  |
| 4432409B16    | 718   | 1.27 | 0.11 | XM_111232.4 |  |
| Pcbp4         | 11204 | 1.27 | 0.07 | NM_021567.2 |  |
| D2ErtD750e    | 362   | 1.27 | 0.33 | NM_026412.1 |  |
| Prnpip1       | 670   | 1.27 | 0.27 | NM_080469.2 |  |
| Mif           | 38407 | 1.27 | 0.15 | NM_010798.1 |  |
| Tkt           | 633   | 1.27 | 0.25 | NM_009388.2 |  |
| Espn          | 2750  | 1.27 | 0.43 | NM_019585.2 |  |
| 2610031L17Rik | 1743  | 1.27 | 0.08 | NM_133701.1 |  |
| Asb6          | 192   | 1.27 | 0.09 | NM_133346.1 |  |
| Fars2         | 1065  | 1.27 | 0.19 |             |  |
| 2900016D05Rik | 204   | 1.27 | 0.07 | NM_028381.1 |  |
| E130307D12    | 358   | 1.27 | 0.12 | XM_128715.5 |  |
| 2700084L22Rik | 669   | 1.27 | 0.21 | NM_026024.1 |  |
| BQ952480      | 203   | 1.27 | 0.14 |             |  |
| Rbmx2         | 94    | 1.27 | 0.37 | NM_173376.1 |  |
| Nfkb1         | 646   | 1.27 | 0.30 | NM_008689.1 |  |
| Dusp22        | 125   | 1.27 | 0.06 | NM_134068.1 |  |
| BC003277      | 2950  | 1.27 | 0.12 | NM_145402.2 |  |
| Max           | 2127  | 1.27 | 0.47 | NM_008558   |  |
| 2600009E05Rik | 4064  | 1.27 | 0.35 | XM_485067   |  |
| Lmnb1         | 1345  | 1.27 | 0.08 | NM_010721   |  |
| 0610009O03Rik | 1906  | 1.27 | 0.14 | NM_026660.2 |  |
| Bxdc1         | 1320  | 1.27 | 0.28 | NM_023323.2 |  |
| Pgf           | 103   | 1.27 | 0.43 | NM_008827.2 |  |
| 1200002M06Rik | 247   | 1.27 | 0.23 | NM_027873.1 |  |
| A430006M23Rik | 88    | 1.27 | 0.28 | AK079675    |  |
| Zfp179        | 59    | 1.27 | 0.66 | NM_009548.2 |  |
| AW146242      | 2466  | 1.27 | 0.19 | NM_146168.1 |  |
| 1700088E04Rik | 1585  | 1.27 | 0.53 | NM_138581.1 |  |
| 9330140N01Rik | 62    | 1.27 | 0.08 | AK034014    |  |
| Emd           | 652   | 1.27 | 0.59 | NM_007927.1 |  |
| Necap2        | 979   | 1.27 | 0.21 |             |  |
| B230308N11Rik | 594   | 1.27 | 0.33 |             |  |
| AU067695      | 1058  | 1.27 | 0.30 | NM_199033.1 |  |
| mtDNA_ND3     | 43    | 1.27 | 0.70 |             |  |
| LOC241262     | 35    | 1.27 | 0.48 | XM_140847.2 |  |
| E330036I19Rik | 940   | 1.27 | 0.21 | NM_144915.2 |  |
| AI326906      | 1496  | 1.27 | 0.19 | NM_153570.2 |  |
| Timm8a1       | 8522  | 1.27 | 0.14 |             |  |
| Bitbd14b      | 82    | 1.27 | 0.31 | NM_025788.2 |  |
| Eif4ebp2      | 676   | 1.27 | 1.06 | NM_010124.1 |  |
| 2310022M17Rik | 582   | 1.27 | 0.08 | XM_126071.2 |  |
| Polr3g        | 122   | 1.27 | 0.25 | XM_283153   |  |
| 2610209M04Rik | 218   | 1.27 | 0.32 | NM_025665.1 |  |
| Plekhm2       | 6316  | 1.27 | 0.15 | XM_204109.2 |  |
| LOC385256     | 161   | 1.27 | 0.32 | XM_358153.1 |  |
| C630028F04Rik | 44    | 1.27 | 0.30 | NM_172885.1 |  |
| 1700034H14Rik | 934   | 1.27 | 0.25 | NM_025969.1 |  |
| Mcm5          | 8592  | 1.27 | 0.02 | NM_008566.1 |  |
| Rxb           | 1191  | 1.27 | 0.02 | NM_011306.2 |  |
| 1700013L23Rik | 240   | 1.27 | 0.25 | XM_130127.3 |  |
| Smad3         | 619   | 1.27 | 0.29 | NM_016769   |  |
| Pts           | 809   | 1.27 | 0.17 | NM_011220.2 |  |
| Yipf3         | 1652  | 1.27 | 0.31 |             |  |
| Sirt4         | 336   | 1.27 | 0.17 | XM_485674   |  |
| Gm166         | 89    | 1.27 | 0.16 |             |  |
| B230210A04Rik | 194   | 1.27 | 0.24 | AK045553    |  |
| Tm4sf1        | 65    | 1.27 | 0.49 | NM_008536.2 |  |
| 4632404H12Rik | 196   | 1.27 | 0.11 | NM_028726.1 |  |
| Mrpl10        | 5234  | 1.27 | 0.19 | NM_026154.1 |  |
| LOC194055     | 57    | 1.27 | 0.76 | XM_111824.2 |  |
| BC006662      | 218   | 1.27 | 0.33 | NM_145466   |  |
| D930008G03Rik | 148   | 1.27 | 0.30 | AK052985    |  |
| 1810021J13Rik | 211   | 1.27 | 0.37 | NM_025464.2 |  |
| LOC242377     | 87    | 1.27 | 0.37 | XM_143698.1 |  |
| Exoc8         | 2916  | 1.27 | 0.12 | NM_198103.1 |  |
| Uchl5         | 1841  | 1.27 | 0.25 | NM_019562.1 |  |

|               |      |      |      |             |  |
|---------------|------|------|------|-------------|--|
| Pdlim7        | 897  | 1.27 | 0.08 | NM_026131   |  |
| Slc7a4        | 493  | 1.27 | 0.30 | NM_144852   |  |
| BC016188      | 1407 | 1.27 | 0.23 | NM_145970.1 |  |
| 1810010N17Rik | 230  | 1.27 | 0.34 | NM_025455.1 |  |
| L3mbtl2       | 587  | 1.27 | 0.31 | NM_145993.2 |  |
| 0610038F07Rik | 760  | 1.27 | 0.23 | NM_025333.2 |  |
| Lias          | 1684 | 1.27 | 0.32 | NM_024471.2 |  |
| Slc6a6        | 2967 | 1.27 | 0.58 | AK041141    |  |
| Dpysl2        | 1556 | 1.27 | 0.20 | NM_009955.2 |  |
| AK129128      | 145  | 1.27 | 0.34 |             |  |
| Hccs          | 227  | 1.27 | 0.13 | NM_008222.2 |  |
| 5730552E08Rik | 113  | 1.27 | 0.56 | AK017831    |  |
| Brp17         | 342  | 1.27 | 0.09 | NM_025580.1 |  |
| A630072J24Rik | 156  | 1.27 | 0.11 | AK042224    |  |
| Hnf4a         | 68   | 1.27 | 0.17 | NM_008261.2 |  |
| lkbke         | 62   | 1.27 | 0.38 |             |  |
| MTERF         | 1043 | 1.27 | 0.13 | NM_172135.1 |  |
| 9930104L06Rik | 70   | 1.27 | 0.21 | NM_177573.2 |  |
| ARP2          | 93   | 1.27 | 0.14 | AK033014    |  |
| Spata5l1      | 171  | 1.27 | 0.26 | XM_141336.2 |  |
| Ephx1         | 3370 | 1.27 | 0.19 | NM_010145.2 |  |
| 1110038G02Rik | 450  | 1.27 | 0.11 | AK004156    |  |
| Surf2         | 1188 | 1.27 | 0.25 | NM_013678.1 |  |
| Lasp1         | 3414 | 1.27 | 0.23 | NM_010688.2 |  |
| LOC382902     | 1684 | 1.27 | 0.20 | XM_356743.1 |  |
| BC043098      | 900  | 1.27 | 0.33 | NM_174997.1 |  |
| LOC231903     | 237  | 1.27 | 0.07 | XM_149717.2 |  |
| Trrp2         | 248  | 1.27 | 0.19 | AK018463    |  |
| 5830404H04Rik | 1156 | 1.27 | 0.21 | NM_174847.1 |  |
| Myd116        | 1091 | 1.27 | 0.33 | NM_008654.1 |  |
| Mthfs         | 85   | 1.27 | 0.30 | NM_026829.1 |  |
| F630043A04Rik | 318  | 1.27 | 0.20 | NM_198605.1 |  |
| LOC242525     | 57   | 1.27 | 0.23 | XM_143897.4 |  |
| 1810054O13Rik | 1442 | 1.27 | 0.34 | NM_026436.1 |  |
| B430110G05Rik | 1481 | 1.27 | 0.35 | NM_178696.2 |  |
| Tmem17        | 292  | 1.27 | 0.20 | NM_153596.1 |  |
| Comt          | 2658 | 1.27 | 0.28 | XM_147265.1 |  |
| Msi2h         | 493  | 1.27 | 0.10 | AK051269    |  |
| D17Wsu92e     | 1845 | 1.27 | 0.14 | XM_128587   |  |
| Sip1          | 181  | 1.27 | 0.04 | NM_025656.1 |  |
| 2410001C21Rik | 1188 | 1.27 | 0.08 | NM_025542.1 |  |
| BC003940      | 4298 | 1.27 | 0.17 | XM_203523.2 |  |
| Eln           | 1032 | 1.27 | 0.27 | NM_007925.2 |  |
| Cdc37l1       | 697  | 1.27 | 0.17 |             |  |
| D930011H02Rik | 48   | 1.26 | 0.14 | AK053005    |  |
| Thumpd1       | 2272 | 1.26 | 0.02 | NM_145585.1 |  |
| Fen1          | 2513 | 1.26 | 0.31 | NM_007999.2 |  |
| Taf1a         | 435  | 1.26 | 0.07 | NM_021466.1 |  |
| 1700013D24Rik | 140  | 1.26 | 0.22 | XM_149793.2 |  |
| Al464131      | 168  | 1.26 | 0.21 | XM_283952.2 |  |
| 9530049G18Rik | 42   | 1.26 | 0.39 | AK035443    |  |
| C230090D14    | 390  | 1.26 | 0.02 | NM_173019.2 |  |
| E230008N13Rik | 81   | 1.26 | 0.35 | NM_198660.1 |  |
| D930046M13Rik | 117  | 1.26 | 0.16 |             |  |
| D430023I21Rik | 149  | 1.26 | 0.25 | AK085008    |  |
| 4933406N12Rik | 41   | 1.26 | 0.19 | NM_028937.1 |  |
| Oxnad1        | 65   | 1.26 | 0.63 |             |  |
| LOC380634     | 1158 | 1.26 | 0.11 | XM_354540.1 |  |
| Raly          | 2101 | 1.26 | 0.31 | NM_023130.1 |  |
| LOC329575     | 430  | 1.26 | 0.12 |             |  |
| Pcoln3        | 285  | 1.26 | 0.50 | NM_145606.1 |  |
| Mrpl50        | 3852 | 1.26 | 0.20 | NM_178603.2 |  |
| Med25         | 6540 | 1.26 | 0.26 |             |  |
| Fbxo36        | 215  | 1.26 | 0.38 | NM_025386.1 |  |
| Letm1         | 383  | 1.26 | 0.11 | NM_019694.1 |  |
| Rai16         | 637  | 1.26 | 0.30 | XM_139129   |  |
| Pcsk7         | 610  | 1.26 | 0.12 | NM_008794.1 |  |
| Fbxl19        | 222  | 1.26 | 0.14 | NM_172748   |  |

|                 |       |      |      |             |  |
|-----------------|-------|------|------|-------------|--|
| Pik3r1          | 677   | 1.26 | 0.28 | NM_011085.1 |  |
| 1200015A19Rik   | 2391  | 1.26 | 0.26 | NM_026388.1 |  |
| Nupl2           | 1169  | 1.26 | 0.13 | NM_153092   |  |
| Unc93b1         | 253   | 1.26 | 0.49 |             |  |
| Leng5           | 2099  | 1.26 | 0.45 | NM_024168.1 |  |
| Btg3            | 120   | 1.26 | 0.16 | AK078652    |  |
| AA960436        | 381   | 1.26 | 0.12 | NM_133954.1 |  |
| EG625054        | 33286 | 1.26 | 0.14 |             |  |
| H2-Ke6          | 2544  | 1.26 | 0.18 | NM_013543.1 |  |
| MJ-6000-172_382 | 53    | 1.26 | 0.12 |             |  |
| Hist2h3c1       | 1885  | 1.26 | 0.22 | NM_019469   |  |
| Mrgpra2         | 113   | 1.26 | 0.11 | NM_153101   |  |
| 5031412I06Rik   | 344   | 1.26 | 0.23 | XM_147346.1 |  |
| 2900006A08Rik   | 280   | 1.26 | 0.37 |             |  |
| Hist1h2bc       | 84    | 1.26 | 0.19 | NM_023422.1 |  |
| 1700019E19Rik   | 643   | 1.26 | 0.31 | NM_029601.1 |  |
| Itpkc           | 704   | 1.26 | 0.32 | NM_181593.2 |  |
| Rbm15           | 748   | 1.26 | 0.13 | XM_131139.4 |  |
| 2010004B12Rik   | 380   | 1.26 | 0.23 | XM_132400.1 |  |
| 6030458B15Rik   | 66    | 1.26 | 0.22 | AK031596    |  |
| Zdhhc4          | 1515  | 1.26 | 0.03 | NM_028379.1 |  |
| BC025519        | 993   | 1.26 | 0.55 | XM_110101.3 |  |
| Grwd1           | 1127  | 1.26 | 0.23 | NM_153419.1 |  |
| Itp2            | 100   | 1.26 | 0.31 | NM_019923.2 |  |
| Hist2h2be       | 97    | 1.26 | 0.12 | NM_178214.1 |  |
| Midn            | 1955  | 1.26 | 0.10 | NM_021565.1 |  |
| 6720485C15Rik   | 6797  | 1.26 | 0.15 | NM_026551.2 |  |
| BC013667        | 231   | 1.26 | 0.14 | NM_172266.1 |  |
| 0610039J04Rik   | 1034  | 1.26 | 0.38 | XM_134310.1 |  |
| Slc9a3r1        | 737   | 1.26 | 0.65 | NM_012030.1 |  |
| Rem2            | 755   | 1.26 | 0.50 | NM_080726.2 |  |
| Ifngr2          | 642   | 1.26 | 0.11 | NM_008338.2 |  |
| Echs1           | 1588  | 1.26 | 0.36 | NM_053119.1 |  |
| mtDNA_ND6       | 40    | 1.26 | 1.00 |             |  |
| Rnf126          | 521   | 1.26 | 0.57 | NM_144528.1 |  |
| Plekhg5         | 827   | 1.26 | 0.58 |             |  |
| Cox18           | 2153  | 1.26 | 0.16 |             |  |
| Ccdc5           | 1205  | 1.26 | 0.09 | NM_146089.1 |  |
| Pomc1           | 70287 | 1.26 | 0.19 | NM_008895.2 |  |
| Tbl3            | 157   | 1.26 | 0.49 | NM_145396.3 |  |
| Sgsh            | 55    | 1.26 | 0.19 | NM_018822   |  |
| Gm1821          | 49204 | 1.26 | 0.18 |             |  |
| Tmem50a         | 2139  | 1.26 | 0.23 |             |  |
| Fbxo6b          | 3162  | 1.26 | 0.17 | NM_015797.1 |  |
| Rage            | 243   | 1.26 | 0.20 | NM_011973   |  |
| Sipa111         | 3055  | 1.26 | 0.16 | NM_172579.1 |  |
| Snrp70          | 633   | 1.26 | 0.15 | NM_009224.2 |  |
| Hcn3            | 223   | 1.26 | 0.33 | NM_008227.1 |  |
| Actr10          | 3048  | 1.26 | 0.26 | NM_019785.1 |  |
| Entpd6          | 393   | 1.26 | 0.15 | NM_172117   |  |
| OTTMUSG000000   | 73    | 1.26 | 0.23 |             |  |
| Rbm9            | 431   | 1.26 | 0.27 | NM_053104.3 |  |
| Rfc2            | 4616  | 1.26 | 0.11 | NM_020022   |  |
| H2-M3           | 736   | 1.26 | 0.28 | NM_013819.1 |  |
| Gnb2            | 5435  | 1.26 | 0.45 | NM_010312.3 |  |
| scl0003955.1_3  | 50    | 1.26 | 0.35 |             |  |
| Apex1           | 1477  | 1.26 | 0.23 | NM_009687   |  |
| 1200003C05Rik   | 3199  | 1.26 | 0.27 | NM_024205.1 |  |
| Mrpl16          | 457   | 1.26 | 0.14 | NM_025606.2 |  |
| Nudt6           | 208   | 1.26 | 0.22 | NM_153561.1 |  |
| Khdrbs3         | 254   | 1.26 | 0.09 | NM_010158.1 |  |
| Itpka           | 83    | 1.26 | 0.17 | NM_146125.1 |  |
| Gm1943          | 237   | 1.26 | 0.16 |             |  |
| Sipa1I2         | 282   | 1.26 | 0.15 | XM_146572.4 |  |
| Galnt10         | 469   | 1.26 | 0.22 | NM_134189.2 |  |
| Pole3           | 640   | 1.26 | 0.16 | NM_021498   |  |
| 2600014C01Rik   | 195   | 1.26 | 0.17 | AK011206    |  |
| Trex1           | 43    | 1.26 | 0.37 | NM_011637.4 |  |

|               |       |      |      |             |  |
|---------------|-------|------|------|-------------|--|
| 1190002J23Rik | 388   | 1.26 | 0.43 | XM_287054.2 |  |
| Mtrf1l        | 369   | 1.26 | 0.10 | NM_175374.2 |  |
| Tle6          | 4512  | 1.26 | 0.24 | NM_053254.1 |  |
| Sfrs5         | 4654  | 1.26 | 0.12 | NM_009159   |  |
| Daxx          | 843   | 1.26 | 0.42 | NM_007829.1 |  |
| A630055I06Rik | 99    | 1.26 | 0.41 | AK042066    |  |
| Loh12cr1      | 242   | 1.26 | 0.14 | NM_026371.2 |  |
| 1700120B06Rik | 109   | 1.26 | 0.10 |             |  |
| Osgep         | 1731  | 1.26 | 0.13 | NM_133676.1 |  |
| Fgf1          | 79    | 1.26 | 0.18 | NM_010197.2 |  |
| Gm237         | 184   | 1.26 | 0.20 |             |  |
| 9130227C08Rik | 2982  | 1.26 | 0.44 | NM_027143   |  |
| Pde6d         | 2303  | 1.26 | 0.50 | NM_008801.2 |  |
| Rps6ka4       | 239   | 1.26 | 0.12 | NM_019924.1 |  |
| Mad1l1        | 131   | 1.26 | 0.17 | AK040246    |  |
| C330023F11Rik | 2656  | 1.26 | 0.06 | NM_178653.2 |  |
| Fgf21         | 25773 | 1.26 | 0.28 | NM_020013.2 |  |
| Eef1b2        | 7505  | 1.26 | 0.51 | NM_018796.2 |  |
| Alg1          | 621   | 1.26 | 0.36 | NM_145362   |  |
| 9330171D12Rik | 102   | 1.26 | 0.17 | AK034275    |  |
| 9626958_317   | 26205 | 1.26 | 0.25 |             |  |
| BC061259      | 327   | 1.26 | 0.17 | NM_198424.1 |  |
| Dctn5         | 2648  | 1.26 | 0.14 | NM_021608.2 |  |
| A530065E19Rik | 575   | 1.26 | 0.15 | NM_145433   |  |
| Hspa5bp1      | 719   | 1.26 | 0.27 | NM_133804.1 |  |
| LOC381891     | 1545  | 1.26 | 0.63 | XM_355907.1 |  |
| Atp6v1e1      | 11661 | 1.26 | 0.34 | NM_007510   |  |
| B4galt7       | 124   | 1.25 | 0.19 | NM_146045.1 |  |
| Tinagl        | 44    | 1.25 | 0.16 |             |  |
| Mapre3        | 55    | 1.25 | 1.01 | NM_133350.1 |  |
| Mga           | 116   | 1.25 | 0.21 | NM_013720   |  |
| Rbm8          | 249   | 1.25 | 0.10 | NM_025875.1 |  |
| Abcd4         | 79    | 1.25 | 0.20 | NM_008992.1 |  |
| Ica1          | 497   | 1.25 | 0.09 | NM_010492.2 |  |
| Rasd2         | 52    | 1.25 | 0.54 | XM_204287.3 |  |
| Osbpl1a       | 223   | 1.25 | 0.28 | AK050641    |  |
| Acaa2         | 315   | 1.25 | 0.16 | NM_177470   |  |
| 1110014D18Rik | 404   | 1.25 | 0.24 | NM_026746.1 |  |
| 4930451G09Rik | 55    | 1.25 | 0.56 | XM_148108.3 |  |
| 2210418H06Rik | 215   | 1.25 | 0.28 |             |  |
| Npm1          | 8518  | 1.25 | 0.05 | NM_008722   |  |
| 1700030K09Rik | 507   | 1.25 | 0.24 | NM_028170.1 |  |
| Psca          | 50    | 1.25 | 0.13 | NM_028216.1 |  |
| Plrg1         | 7011  | 1.25 | 0.22 | NM_016784.2 |  |
| Nup62         | 7680  | 1.25 | 0.11 | NM_053074.1 |  |
| 5730458D16Rik | 57    | 1.25 | 0.25 | NM_177609   |  |
| Rnf25         | 423   | 1.25 | 0.05 | NM_021313.1 |  |
| Mmp17         | 1725  | 1.25 | 0.35 | NM_011846   |  |
| Chst8         | 2876  | 1.25 | 0.05 | NM_175140.3 |  |
| LOC238836     | 21029 | 1.25 | 0.23 | XM_138832.1 |  |
| Mgat5         | 68    | 1.25 | 0.09 | NM_145128.2 |  |
| Rer1          | 672   | 1.25 | 0.26 |             |  |
| Fem1b         | 3460  | 1.25 | 0.22 | NM_010193.3 |  |
| 2610312F20Rik | 339   | 1.25 | 0.28 |             |  |
| LOC385172     | 59    | 1.25 | 0.27 | XM_358101.1 |  |
| H2-Q8         | 47    | 1.25 | 0.34 | NM_023124   |  |
| Tnk2          | 840   | 1.25 | 0.50 | NM_016788   |  |
| 9430014F16Rik | 102   | 1.25 | 0.25 |             |  |
| Nr1d1         | 234   | 1.25 | 0.48 | NM_145434.1 |  |
| 4732481H14Rik | 260   | 1.25 | 0.10 | NM_172468.1 |  |
| 6430573F11Rik | 181   | 1.25 | 0.11 | NM_176952.3 |  |
| LOC381501     | 879   | 1.25 | 0.54 | XM_355458.1 |  |
| Adam24        | 48    | 1.25 | 0.50 | NM_010086.2 |  |
| Elov16        | 590   | 1.25 | 0.42 | NM_130450.1 |  |
| Tax1bp3       | 1384  | 1.25 | 0.21 | NM_029564.1 |  |
| Tipin         | 1057  | 1.25 | 0.18 | NM_025372   |  |
| Wrb           | 1695  | 1.25 | 0.10 | AK084688    |  |
| 0610009F02Rik | 1309  | 1.25 | 0.12 | NM_029508.1 |  |

|               |       |      |      |             |  |
|---------------|-------|------|------|-------------|--|
| Men1          | 612   | 1.25 | 0.20 | NM_008583.1 |  |
| Vars2l        | 1546  | 1.25 | 0.20 | NM_175137.3 |  |
| Ext1          | 636   | 1.25 | 0.25 | NM_010162.1 |  |
| Rent1         | 540   | 1.25 | 0.40 | NM_030680   |  |
| 8430420C20Rik | 229   | 1.25 | 0.28 | NM_145586.1 |  |
| Trap1         | 1957  | 1.25 | 0.22 | NM_026508.1 |  |
| 1600013P15Rik | 258   | 1.25 | 0.32 | NM_025907.2 |  |
| Cdk5rap1      | 945   | 1.25 | 0.18 | NM_025876.1 |  |
| 4921513D23Rik | 1190  | 1.25 | 0.16 |             |  |
| Mxra8         | 286   | 1.25 | 0.24 |             |  |
| LOC381105     | 706   | 1.25 | 0.20 | XM_355021.1 |  |
| Sae1          | 6222  | 1.25 | 0.10 |             |  |
| Gaa           | 1667  | 1.25 | 0.09 | NM_008064.2 |  |
| 4930544G11Rik | 86    | 1.25 | 0.17 | NM_026294.1 |  |
| Dmap1         | 1231  | 1.25 | 0.10 | NM_023178.2 |  |
| Glce          | 906   | 1.25 | 0.15 | NM_033320   |  |
| Zc3hdc8       | 203   | 1.25 | 0.07 | NM_020594.1 |  |
| Gm1141        | 62    | 1.25 | 0.13 |             |  |
| V1rg11        | 53    | 1.25 | 0.57 | NM_134233.1 |  |
| 1810013B01Rik | 206   | 1.25 | 0.38 | NM_029631   |  |
| Prss8         | 79    | 1.25 | 0.04 | NM_133351.1 |  |
| Wdr40a        | 52    | 1.25 | 0.46 | NM_026893.2 |  |
| Sulf2         | 3517  | 1.25 | 0.04 | XM_358343.1 |  |
| Car11         | 53    | 1.25 | 0.19 | NM_009800.2 |  |
| Josd3         | 387   | 1.25 | 0.22 |             |  |
| Mocs3         | 178   | 1.25 | 0.80 | XM_130596   |  |
| Adhfe1        | 325   | 1.25 | 0.28 | NM_175236   |  |
| Rad51l3       | 87    | 1.25 | 0.17 | NM_011235.2 |  |
| 2400006N03Rik | 92    | 1.25 | 0.16 | XM_126152.3 |  |
| Ap1b1         | 2776  | 1.25 | 0.24 | NM_007454   |  |
| Asrij         | 5162  | 1.25 | 0.20 | NM_023429.2 |  |
| Samhd1        | 183   | 1.25 | 0.17 | NM_018851.2 |  |
| 3110037I16Rik | 427   | 1.25 | 0.34 | NM_028457.1 |  |
| B230363K08Rik | 89    | 1.25 | 0.20 | NM_172848.2 |  |
| Whdc1         | 240   | 1.25 | 0.75 |             |  |
| Gna15         | 67    | 1.25 | 0.34 | NM_010304.3 |  |
| Mtg1          | 269   | 1.25 | 0.16 |             |  |
| Ian6          | 292   | 1.25 | 0.34 | NM_153175.2 |  |
| Mpdu1         | 68    | 1.25 | 0.43 | NM_011900.2 |  |
| Poldip2       | 6640  | 1.25 | 0.08 | NM_026389.2 |  |
| D230007L07Rik | 36    | 1.25 | 0.81 | AK051835    |  |
| Ptdss2        | 204   | 1.25 | 0.09 | AK021249    |  |
| Scly          | 356   | 1.25 | 0.31 | NM_016717.2 |  |
| 4930451I11Rik | 39    | 1.25 | 0.06 | NM_183131.1 |  |
| H2-T23        | 1167  | 1.25 | 0.23 | NM_010398.1 |  |
| Zec           | 170   | 1.25 | 0.14 | NM_170759.1 |  |
| Cnot3         | 314   | 1.25 | 0.66 | NM_146176   |  |
| Rpo1-4        | 1161  | 1.25 | 0.14 | AK031689    |  |
| BC027231      | 473   | 1.25 | 0.13 | NM_145972   |  |
| 8030459N02Rik | 1996  | 1.25 | 0.21 | AK033202    |  |
| 2410187C16Rik | 204   | 1.25 | 0.17 | AK010831    |  |
| 6330579B17Rik | 1406  | 1.25 | 0.30 | NM_026494.1 |  |
| col11a2       | 49    | 1.25 | 0.64 | D38412      |  |
| Slc7a5        | 14686 | 1.25 | 0.47 | NM_011404.2 |  |
| Mrpl39        | 234   | 1.25 | 0.30 | NM_017404.2 |  |
| Faim          | 737   | 1.25 | 0.18 | NM_011810.2 |  |
| Prmt5         | 2332  | 1.25 | 0.14 |             |  |
| C330006H24Rik | 156   | 1.25 | 0.21 | AK049137    |  |
| 2310021P13Rik | 347   | 1.25 | 0.45 | XM_127591.4 |  |
| G3bp          | 3802  | 1.25 | 0.23 | NM_013716   |  |
| Gapd          | 55289 | 1.25 | 0.20 | NM_008084.1 |  |
| Phf13         | 1260  | 1.25 | 0.22 | NM_172705.1 |  |
| 2510008P16Rik | 216   | 1.25 | 0.16 | AK010939    |  |
| Apeh          | 3470  | 1.25 | 0.22 | NM_146226.1 |  |
| Gstp2         | 20481 | 1.25 | 0.43 |             |  |
| Fbxl15        | 538   | 1.25 | 0.48 | NM_133694   |  |
| Pafah1b1      | 433   | 1.25 | 0.31 | NM_013625.1 |  |
| Adprhl2       | 168   | 1.25 | 0.12 | NM_133883.1 |  |

|               |       |      |      |             |  |
|---------------|-------|------|------|-------------|--|
| Aplp2         | 6392  | 1.25 | 0.15 | NM_009691.1 |  |
| 5330410G16Rik | 186   | 1.25 | 0.42 | NM_182991.1 |  |
| Armc7         | 94    | 1.25 | 0.31 | NM_177778.3 |  |
| B3galt1       | 39    | 1.25 | 0.42 | NM_020283.1 |  |
| Arfp2         | 1196  | 1.25 | 0.21 | NM_029802.2 |  |
| Ela1          | 91    | 1.25 | 0.25 | NM_033612.1 |  |
| Orc6l         | 3112  | 1.25 | 0.33 | NM_019716.1 |  |
| Tsga14        | 667   | 1.25 | 0.20 | AK019270    |  |
| LOC329092     | 55    | 1.25 | 0.68 | XM_286959.1 |  |
| Utp14a        | 142   | 1.25 | 0.40 | XM_135857.4 |  |
| Ptpv          | 992   | 1.25 | 0.14 | NM_007955.2 |  |
| Hyal2         | 3145  | 1.25 | 0.12 | NM_010489.2 |  |
| LOC382020     | 15823 | 1.25 | 0.28 | XM_356090.1 |  |
| Kif5c         | 2888  | 1.25 | 0.38 | NM_008449.2 |  |
| Ppp1r3c       | 2416  | 1.25 | 0.19 | NM_016854.1 |  |
| Endog         | 39    | 1.25 | 0.16 | NM_007931.1 |  |
| Cdr2          | 3264  | 1.25 | 0.32 | NM_007672.1 |  |
| Gorasp1       | 375   | 1.24 | 0.15 | NM_028976   |  |
| 4930572F24Rik | 42    | 1.24 | 0.48 | AK019808    |  |
| 5730407K14Rik | 156   | 1.24 | 0.45 | XM_355366.1 |  |
| A630049A05Rik | 448   | 1.24 | 0.10 | AK041962    |  |
| Uqcrc2        | 11261 | 1.24 | 0.15 | NM_025899.1 |  |
| Mgat3         | 142   | 1.24 | 0.33 | NM_010795.2 |  |
| Ddx47         | 2342  | 1.24 | 0.05 | NM_026360.1 |  |
| Gm631         | 1160  | 1.24 | 0.13 | NM_199310.1 |  |
| Gpc1          | 9204  | 1.24 | 0.37 | NM_016696.1 |  |
| 4931431C02Rik | 2367  | 1.24 | 0.37 | XM_486200   |  |
| 2310022B05Rik | 6144  | 1.24 | 0.43 | NM_175149.3 |  |
| Ubap1         | 623   | 1.24 | 0.17 | NM_023305   |  |
| Arrb2         | 440   | 1.24 | 0.70 | NM_145429.1 |  |
| Rnf127        | 89    | 1.24 | 0.14 | XM_135829.1 |  |
| 2010005E20Rik | 55    | 1.24 | 0.29 | AK008118    |  |
| 1700012F10Rik | 733   | 1.24 | 0.22 | AK005902    |  |
| H2afx         | 943   | 1.24 | 0.76 | NM_010436.2 |  |
| Bcl2l2        | 580   | 1.24 | 0.34 | AK013244    |  |
| 2900019M05Rik | 1640  | 1.24 | 0.17 |             |  |
| 2310002B06Rik | 1210  | 1.24 | 0.11 | NM_181649   |  |
| LOC276809     | 556   | 1.24 | 0.34 | XM_204567.2 |  |
| Ubap2l        | 1118  | 1.24 | 0.42 | NM_028475.1 |  |
| 5730494J16Rik | 153   | 1.24 | 0.30 | AK077637    |  |
| AA517739      | 137   | 1.24 | 0.13 | XM_484570   |  |
| Cd8b          | 1944  | 1.24 | 0.17 | NM_009858.1 |  |
| 1810006K23Rik | 652   | 1.24 | 0.37 |             |  |
| 4930406P12Rik | 49    | 1.24 | 0.21 | AK015109    |  |
| Pnpo          | 483   | 1.24 | 0.04 |             |  |
| Mcf2          | 1082  | 1.24 | 0.17 | NM_176808.2 |  |
| BC025833      | 301   | 1.24 | 0.46 | NM_145987.1 |  |
| Zfp263        | 2547  | 1.24 | 0.08 | NM_148924.2 |  |
| Tnfaip1       | 6583  | 1.24 | 0.05 | NM_009395.2 |  |
| Oraov1        | 1200  | 1.24 | 0.13 | NM_028184.2 |  |
| Olfml3        | 180   | 1.24 | 0.64 | NM_133859.1 |  |
| Nup37         | 313   | 1.24 | 0.27 | NM_028334.1 |  |
| Xpnpep1       | 1747  | 1.24 | 0.08 | NM_133216.2 |  |
| Hist2h3b      | 6506  | 1.24 | 0.33 | NM_178215   |  |
| D630042P16Rik | 533   | 1.24 | 0.25 | NM_175525.2 |  |
| C530044C16Rik | 423   | 1.24 | 0.17 |             |  |
| Thap7         | 2103  | 1.24 | 0.49 | NM_026909.1 |  |
| Vdac3         | 2348  | 1.24 | 0.17 | NM_011696.1 |  |
| Plod1         | 361   | 1.24 | 0.56 | NM_011122.1 |  |
| Pex11c        | 56    | 1.24 | 0.49 | NM_026951   |  |
| Tgfb3         | 66    | 1.24 | 0.37 | NM_009368.1 |  |
| Rheb1         | 623   | 1.24 | 0.22 | NM_026967.3 |  |
| Vkorc1l1      | 1004  | 1.24 | 0.26 | NM_027121.2 |  |
| Nubp1         | 1808  | 1.24 | 0.23 | AK020876    |  |
| Nef3          | 573   | 1.24 | 0.14 | NM_008691   |  |
| Akr1b3        | 1138  | 1.24 | 0.19 | NM_009658.2 |  |
| Sh3bp2        | 396   | 1.24 | 0.10 | NM_011893   |  |
| LOC385086     | 41772 | 1.24 | 0.12 | XM_358044.1 |  |

|                 |       |      |      |             |  |
|-----------------|-------|------|------|-------------|--|
| Pgam5           | 6765  | 1.24 | 0.26 |             |  |
| Clns1a          | 2585  | 1.24 | 0.16 | NM_023671.1 |  |
| D630040I23Rik   | 1419  | 1.24 | 0.22 |             |  |
| AW822216        | 272   | 1.24 | 0.29 | NM_178884   |  |
| 3110001P07Rik   | 3710  | 1.24 | 0.09 | AK013971    |  |
| Ubqln1          | 1278  | 1.24 | 0.32 | NM_152234.1 |  |
| LOC382585       | 432   | 1.24 | 0.15 | XM_356580.1 |  |
| LOC223653       | 196   | 1.24 | 0.04 | XM_147965.2 |  |
| Acate3          | 685   | 1.24 | 0.15 | NM_022816.1 |  |
| scl0003161.1_42 | 36    | 1.24 | 0.90 |             |  |
| Acads           | 820   | 1.24 | 0.20 | NM_007383.2 |  |
| Hat1            | 15415 | 1.24 | 0.15 | NM_026115.2 |  |
| EG433923        | 7927  | 1.24 | 0.29 |             |  |
| AI553587        | 201   | 1.24 | 0.39 | NM_178909.3 |  |
| Nrarp           | 466   | 1.24 | 0.19 | NM_025980.1 |  |
| Pcsk1n          | 544   | 1.24 | 0.66 | NM_013892   |  |
| AA415398        | 325   | 1.24 | 0.10 |             |  |
| Gtf2f1          | 703   | 1.24 | 0.13 | NM_133801.1 |  |
| Rhot2           | 748   | 1.24 | 0.12 | NM_145999.2 |  |
| B230208J24Rik   | 67    | 1.24 | 0.52 | NM_145356.2 |  |
| Fah             | 1444  | 1.24 | 0.02 | NM_010176.1 |  |
| Scarb2          | 1622  | 1.24 | 0.05 | NM_007644.2 |  |
| 1500041B16Rik   | 327   | 1.24 | 0.24 | XM_354599.1 |  |
| 2810008M24Rik   | 1046  | 1.24 | 0.34 |             |  |
| LOC385679       | 95    | 1.24 | 0.58 | XM_358909.1 |  |
| 4930553M18Rik   | 152   | 1.24 | 0.18 | NM_026541   |  |
| Rhbdl2          | 1157  | 1.24 | 0.13 |             |  |
| Cnn3            | 399   | 1.24 | 0.16 | NM_028044.1 |  |
| Gpr44           | 245   | 1.24 | 0.47 | NM_009962.2 |  |
| 6330565B04Rik   | 44    | 1.24 | 0.55 | XM_129826.1 |  |
| Gpsn2           | 3035  | 1.24 | 0.47 | NM_134118.1 |  |
| Gpr103          | 49    | 1.24 | 0.79 | NM_198192.1 |  |
| Atp10d          | 113   | 1.24 | 0.27 | NM_153389.2 |  |
| 4932418E24Rik   | 37    | 1.24 | 0.59 | NM_177841.2 |  |
| Skb1            | 1970  | 1.24 | 0.08 | NM_013768.1 |  |
| LOC213948       | 225   | 1.24 | 0.24 | XM_149596.3 |  |
| Zfp639          | 2221  | 1.24 | 0.14 | NM_144519   |  |
| Pak1ip1         | 87    | 1.24 | 0.34 | NM_026550.1 |  |
| A630032J15Rik   | 69    | 1.24 | 0.27 | AK041725    |  |
| 2810422J05Rik   | 176   | 1.24 | 0.17 | XM_284425.1 |  |
| Mlit11          | 2884  | 1.24 | 0.05 |             |  |
| 5630401D24Rik   | 392   | 1.24 | 0.12 | NM_144877.1 |  |
| Actl6           | 143   | 1.24 | 0.61 | NM_031404.3 |  |
| Sars            | 1463  | 1.24 | 0.02 |             |  |
| Alkbh           | 550   | 1.24 | 0.15 | XM_127049   |  |
| Syf2            | 1658  | 1.24 | 0.22 |             |  |
| D230040E23      | 48    | 1.24 | 0.78 | NM_177908.2 |  |
| BC023055        | 612   | 1.24 | 0.34 | NM_198108.1 |  |
| Sh3gl3          | 59    | 1.24 | 0.94 | NM_017400.1 |  |
| Vapb            | 938   | 1.24 | 0.06 | NM_019806.3 |  |
| B230337K13Rik   | 33    | 1.24 | 1.19 | AK046047    |  |
| Tm4sf3          | 84    | 1.24 | 0.18 | NM_146010.1 |  |
| BC016201        | 83    | 1.24 | 0.27 | NM_145601.1 |  |
| Got2            | 5692  | 1.24 | 0.07 | NM_010325   |  |
| Mrgpre          | 73    | 1.24 | 0.48 | NM_175534.2 |  |
| Cin3            | 816   | 1.24 | 0.04 | NM_009907.2 |  |
| C77032          | 5118  | 1.24 | 0.16 | NM_153547.2 |  |
| Tfrc            | 8147  | 1.24 | 0.44 | NM_011638.3 |  |
| LOC381534       | 89    | 1.24 | 0.07 | XM_355502.1 |  |
| Ankrd25         | 50    | 1.24 | 0.54 | NM_145611.2 |  |
| Traf4           | 840   | 1.24 | 0.20 | NM_009423.2 |  |
| Pgk1            | 7132  | 1.24 | 0.08 | NM_008828.1 |  |
| Mlycd           | 965   | 1.24 | 0.10 | NM_019966.1 |  |
| Crim2           | 68    | 1.24 | 0.37 |             |  |
| BC048390        | 45    | 1.24 | 0.41 | NM_178414.2 |  |
| Fbxo33          | 1578  | 1.24 | 0.03 |             |  |
| Krt2-8          | 5550  | 1.24 | 0.16 | NM_031170.1 |  |
| Dcdbl1          | 160   | 1.24 | 0.15 | NM_025705.1 |  |



|               |       |      |      |             |  |
|---------------|-------|------|------|-------------|--|
| D6Mm5e        | 113   | 1.24 | 0.15 | NM_033079.1 |  |
| LOC211895     | 228   | 1.24 | 0.05 | XM_134161.2 |  |
| 5430405G05Rik | 69    | 1.24 | 0.36 | XM_130642.3 |  |
| Glt8d3        | 262   | 1.24 | 0.09 |             |  |
| Nsep1         | 17126 | 1.24 | 0.17 | NM_011732   |  |
| LOC385952     | 40    | 1.24 | 0.34 | XM_359010.1 |  |
| 4732475C15Rik | 99    | 1.24 | 0.22 | AK028967    |  |
| Ubf           | 707   | 1.24 | 0.20 | NM_011551   |  |
| 9930032E18Rik | 180   | 1.24 | 0.14 | AK036978    |  |
| mt-Nd4l       | 1918  | 1.24 | 0.17 |             |  |
| D16H22S680E   | 3687  | 1.24 | 0.33 | XM_147173.1 |  |
| Gpr120        | 13265 | 1.23 | 0.08 | NM_181748.1 |  |
| Luc7l         | 793   | 1.23 | 0.12 | NM_025881.1 |  |
| Npc2          | 1094  | 1.23 | 0.27 | NM_023409.3 |  |
| Gpi1          | 6023  | 1.23 | 0.11 | NM_008155.1 |  |
| Mpv17l        | 381   | 1.23 | 0.07 | NM_033564.1 |  |
| Pnpla2        | 5272  | 1.23 | 0.10 | NM_025802   |  |
| Gtf2h2        | 717   | 1.23 | 0.15 | NM_022011   |  |
| Nif3l1        | 538   | 1.23 | 0.05 | NM_022988.2 |  |
| 2400009B11Rik | 286   | 1.23 | 0.22 | NM_025886   |  |
| C630024N05Rik | 236   | 1.23 | 0.16 | AK083192    |  |
| Ptpn1         | 883   | 1.23 | 0.20 | NM_011201.1 |  |
| Cdk5r1        | 608   | 1.23 | 0.11 | NM_009871.2 |  |
| LOC218241     | 59    | 1.23 | 0.30 | XM_138612.3 |  |
| Ccdc9         | 66    | 1.23 | 0.21 | NM_172297.1 |  |
| LOC384344     | 58    | 1.23 | 0.48 | XM_357591.1 |  |
| Fbxl18        | 210   | 1.23 | 0.26 | XM_485692   |  |
| Mare          | 145   | 1.23 | 0.16 | NM_181569   |  |
| Rusc1         | 240   | 1.23 | 0.34 | NM_028188.1 |  |
| 2310007H09Rik | 376   | 1.23 | 0.62 | XM_486016   |  |
| Ntan1         | 1653  | 1.23 | 0.23 | NM_010946.2 |  |
| B230337E09Rik | 150   | 1.23 | 0.16 | AK046038    |  |
| Tor3a         | 232   | 1.23 | 0.17 | NM_023141   |  |
| LOC384206     | 23918 | 1.23 | 0.18 | XM_357488.1 |  |
| Ggcx          | 84    | 1.23 | 0.11 | AK030779    |  |
| Smpd1         | 1407  | 1.23 | 0.14 | NM_011421.1 |  |
| 2010305A19Rik | 284   | 1.23 | 0.06 | NM_027250   |  |
| E030001117Rik | 44    | 1.23 | 0.29 | AK086790    |  |
| Tmem86b       | 50    | 1.23 | 0.21 |             |  |
| Olfir982      | 76    | 1.23 | 0.47 | NM_146854.1 |  |
| Phgdh1        | 371   | 1.23 | 0.22 |             |  |
| Phospho1      | 92    | 1.23 | 0.35 | NM_153104.1 |  |
| Psme1         | 1001  | 1.23 | 0.46 | NM_011189.1 |  |
| D1Wsu40e      | 4815  | 1.23 | 0.39 | NM_178601.2 |  |
| Stc2          | 1332  | 1.23 | 0.11 | NM_011491   |  |
| Dot1l         | 595   | 1.23 | 0.27 | NM_199322.1 |  |
| LOC210429     | 204   | 1.23 | 0.42 | XM_127461.2 |  |
| Cln4-2        | 153   | 1.23 | 0.26 | NM_011334.2 |  |
| Aven          | 98    | 1.23 | 0.17 | NM_028844.1 |  |
| LOC384887     | 47    | 1.23 | 0.60 | XM_357918.1 |  |
| Gltscr2       | 1996  | 1.23 | 0.22 | NM_133831.1 |  |
| 1600027N09Rik | 59    | 1.23 | 0.05 | XM_130743.3 |  |
| Eif3s6ip      | 8073  | 1.23 | 0.08 | NM_145139.1 |  |
| Eif4g1        | 3793  | 1.23 | 0.09 | XM_358318   |  |
| Nr6a1         | 320   | 1.23 | 0.18 | NM_010264.2 |  |
| Tnfsf13       | 120   | 1.23 | 0.18 | NM_023517.1 |  |
| Hnrph3        | 100   | 1.23 | 0.46 |             |  |
| G430064M09Rik | 63    | 1.23 | 0.25 | AK090023    |  |
| Mfn2          | 1294  | 1.23 | 0.38 | NM_133201.1 |  |
| Ascc2         | 244   | 1.23 | 0.39 |             |  |
| C130032J12Rik | 361   | 1.23 | 0.03 | NM_178684.2 |  |
| Apba3         | 1584  | 1.23 | 0.30 | NM_018758.1 |  |
| Slc39a13      | 187   | 1.23 | 0.34 | XM_485038   |  |
| LOC386348     | 160   | 1.23 | 0.17 | XM_359179.1 |  |
| Rab3d         | 1519  | 1.23 | 0.35 | NM_031874.3 |  |
| Il1rl1l       | 130   | 1.23 | 0.40 | NM_010744.1 |  |
| mt-Nd4        | 62118 | 1.23 | 0.08 |             |  |
| Barx2         | 498   | 1.23 | 0.30 | NM_013800.1 |  |

|                  |       |      |      |             |  |
|------------------|-------|------|------|-------------|--|
| LOC245251        | 58476 | 1.23 | 0.14 | XM_142867.2 |  |
| Nt5c3            | 3144  | 1.23 | 0.16 | NM_026004.1 |  |
| D430028G21Rik    | 587   | 1.23 | 0.26 | NM_144888.1 |  |
| BC026744         | 2335  | 1.23 | 0.13 | NM_177876.2 |  |
| B3galt6          | 731   | 1.23 | 0.09 | NM_080445.2 |  |
| 2610041P08Rik    | 84    | 1.23 | 0.63 | NM_198008.1 |  |
| Ckn1             | 344   | 1.23 | 0.12 | NM_028042.1 |  |
| Cspg4            | 56    | 1.23 | 0.58 | NM_139001.1 |  |
| LOC386005        | 1136  | 1.23 | 0.18 | XM_359031.1 |  |
| Fh1              | 1895  | 1.23 | 0.35 | NM_010209   |  |
| Jarid1b          | 327   | 1.23 | 0.14 | NM_152895   |  |
| Itpk1            | 4844  | 1.23 | 0.12 | NM_172584.1 |  |
| B130030F12Rik    | 33    | 1.23 | 1.10 | AK045079    |  |
| BC022133         | 75    | 1.23 | 0.23 | NM_144940.1 |  |
| A630067N03Rik    | 244   | 1.23 | 0.15 | AK042186    |  |
| Zbp1             | 79    | 1.23 | 0.42 | NM_021394.1 |  |
| C920004C08Rik    | 1615  | 1.23 | 0.26 |             |  |
| Cd81             | 16858 | 1.23 | 0.04 | NM_133655.1 |  |
| 1110014N23Rik    | 804   | 1.23 | 0.13 | XM_283543.2 |  |
| BC021614         | 455   | 1.23 | 0.59 | NM_144869.1 |  |
| LOC386405        | 2974  | 1.23 | 0.09 | XM_359211.1 |  |
| Upf3a            | 403   | 1.23 | 0.30 | XM_356061.1 |  |
| 2310001A20Rik    | 2406  | 1.23 | 0.16 | NM_027977.1 |  |
| scl000063.1_0_RE | 1587  | 1.23 | 0.08 |             |  |
| Psm7             | 1529  | 1.23 | 0.11 | NM_010817.1 |  |
| Cpsf4            | 78    | 1.23 | 0.37 | NM_178576.1 |  |
| 6330581N18Rik    | 71    | 1.23 | 0.36 | NM_176915.2 |  |
| Tjp2             | 142   | 1.23 | 0.33 | NM_011597.1 |  |
| 2210418B03Rik    | 37    | 1.23 | 0.48 | AK008972    |  |
| Eif4e            | 55    | 1.23 | 0.56 | NM_007917   |  |
| Mapk12           | 346   | 1.23 | 0.17 | NM_013871.2 |  |
| Cct2             | 145   | 1.23 | 0.15 | NM_007636.1 |  |
| BC022145         | 47    | 1.23 | 0.24 | NM_144830.1 |  |
| Snx12            | 327   | 1.23 | 0.10 | NM_018875.1 |  |
| Srp9             | 1605  | 1.23 | 0.34 | NM_012058   |  |
| Xkr4             | 59    | 1.23 | 0.24 |             |  |
| Kcne2            | 52    | 1.23 | 0.24 | NM_134110.1 |  |
| Irf2bp1          | 1792  | 1.23 | 0.13 | NM_178757.3 |  |
| Slc12a8          | 216   | 1.23 | 0.21 | NM_134251   |  |
| Mapkap1          | 603   | 1.23 | 0.12 | NM_177345.2 |  |
| 2410131K14Rik    | 537   | 1.23 | 0.18 | XM_485677   |  |
| 9626965_214_rc   | 74    | 1.23 | 0.66 |             |  |
| 1700082M22Rik    | 57    | 1.23 | 0.35 | NM_028564.1 |  |
| Rgs12            | 545   | 1.23 | 0.08 | NM_173402.1 |  |
| Wars             | 617   | 1.23 | 0.09 | NM_011710.2 |  |
| A930038D23Rik    | 59    | 1.23 | 0.44 |             |  |
| 1700061J05Rik    | 81    | 1.23 | 0.68 | XM_181371.3 |  |
| Hgs              | 847   | 1.23 | 0.41 | NM_008244.2 |  |
| Lrriq2           | 234   | 1.23 | 0.25 | NM_028815.3 |  |
| Sumo3            | 2188  | 1.23 | 0.04 | NM_019929.1 |  |
| Mist1            | 111   | 1.23 | 0.24 | NM_010800.2 |  |
| lqsec2           | 106   | 1.23 | 0.13 |             |  |
| scl000559.1_47   | 257   | 1.23 | 0.30 |             |  |
| G630007B09Rik    | 67    | 1.23 | 0.65 | AK090152    |  |
| Fkbp1a           | 7195  | 1.23 | 0.35 | NM_008019   |  |
| Atp6v1g2         | 64    | 1.23 | 0.25 | NM_023179.2 |  |
| Muc20            | 319   | 1.23 | 0.49 | NM_146071   |  |
| Rad52            | 683   | 1.23 | 0.40 | NM_011236.1 |  |
| ldb3             | 299   | 1.23 | 0.08 | NM_008321.1 |  |
| Pdcd6ip          | 368   | 1.23 | 0.47 | NM_011052.1 |  |
| Cab39            | 33    | 1.23 | 0.67 | NM_133781.2 |  |
| Csnk1d           | 2936  | 1.23 | 0.18 | NM_027874.1 |  |
| M6pr             | 1782  | 1.23 | 0.22 | NM_010749.4 |  |
| 2310002J21Rik    | 118   | 1.23 | 0.24 |             |  |
| Fbxl12           | 148   | 1.23 | 0.39 | NM_013911.1 |  |
| 0610011119Rik    | 228   | 1.23 | 0.38 | AK002548    |  |
| Thg1l            | 489   | 1.23 | 0.21 |             |  |
| Sfxn1            | 9495  | 1.23 | 0.08 | NM_027324.2 |  |

|               |       |      |      |             |  |
|---------------|-------|------|------|-------------|--|
| Prep          | 1376  | 1.23 | 0.09 | AK007865    |  |
| 1810009O10Rik | 320   | 1.23 | 0.37 | NM_197989   |  |
| A930035O15Rik | 66    | 1.23 | 0.28 | AK020932    |  |
| Thnsl2        | 201   | 1.23 | 0.33 |             |  |
| Cyp4v3        | 116   | 1.23 | 0.13 | NM_133969.1 |  |
| 1110003E01Rik | 5860  | 1.23 | 0.12 | NM_133697.1 |  |
| Tmem15        | 1281  | 1.23 | 0.33 | NM_177648.2 |  |
| B3galnt1      | 526   | 1.23 | 0.23 |             |  |
| Ckmt1         | 2687  | 1.23 | 0.16 | AK018487    |  |
| LOC331507     | 3580  | 1.23 | 0.58 | XM_284733.2 |  |
| 4930453N24Rik | 3436  | 1.23 | 0.07 | XM_148353.3 |  |
| Lonp2         | 1016  | 1.23 | 0.39 |             |  |
| 1110002B05Rik | 4068  | 1.23 | 0.13 | NM_134054.1 |  |
| 1810033A06Rik | 536   | 1.23 | 0.22 | NM_026981.1 |  |
| 2010305C02Rik | 43    | 1.23 | 0.13 | NM_027249   |  |
| Mrps9         | 6037  | 1.23 | 0.14 | NM_023514.2 |  |
| Glipr1        | 131   | 1.23 | 0.20 | NM_028608.1 |  |
| Dpp3          | 1871  | 1.22 | 0.13 | NM_133803.1 |  |
| 2310036D04Rik | 235   | 1.22 | 0.52 | XM_488563   |  |
| Zcchc3        | 101   | 1.22 | 0.20 | NM_175126.3 |  |
| Myd88         | 768   | 1.22 | 0.11 | NM_010851   |  |
| Zfp574        | 1410  | 1.22 | 0.16 | NM_175477.2 |  |
| 1500016H10Rik | 862   | 1.22 | 0.16 | NM_025433.2 |  |
| Eml3          | 287   | 1.22 | 0.17 |             |  |
| Palm          | 586   | 1.22 | 0.44 | NM_023128.2 |  |
| Rae1          | 2184  | 1.22 | 0.23 | NM_175112.2 |  |
| Refbp2        | 178   | 1.22 | 0.16 | NM_019484   |  |
| Trit1         | 859   | 1.22 | 0.06 | NM_025873.1 |  |
| Cdkl5         | 97    | 1.22 | 0.65 | XM_356367.1 |  |
| Gnai2         | 2776  | 1.22 | 0.60 | NM_008138   |  |
| LOC226416     | 32406 | 1.22 | 0.13 | XM_129460.4 |  |
| Scamp4        | 3297  | 1.22 | 0.66 | NM_019575.4 |  |
| A330067P21    | 53    | 1.22 | 0.05 | XM_485305   |  |
| Zswim1        | 1099  | 1.22 | 0.19 | NM_028028.2 |  |
| 5830482G23Rik | 240   | 1.22 | 0.24 | NM_152822.1 |  |
| Krtap16-4     | 47    | 1.22 | 0.79 | NM_130873.1 |  |
| AW121567      | 2717  | 1.22 | 0.24 | NM_173446.1 |  |
| Dip2b         | 56    | 1.22 | 0.59 |             |  |
| Dlst          | 2127  | 1.22 | 0.17 | NM_030225.3 |  |
| Stk16         | 147   | 1.22 | 0.17 | NM_011494.2 |  |
| Bcl2l13       | 1272  | 1.22 | 0.15 | NM_153516.1 |  |
| Efcab1        | 7108  | 1.22 | 0.19 |             |  |
| Sfrs8         | 46    | 1.22 | 0.36 | NM_172276.1 |  |
| 2610204K14Rik | 249   | 1.22 | 0.23 | NM_025997.1 |  |
| A630005A06Rik | 150   | 1.22 | 0.14 | NM_198664.1 |  |
| Rec8L1        | 197   | 1.22 | 0.03 | NM_020002.2 |  |
| Nfe2l1        | 6914  | 1.22 | 0.11 | NM_008686.2 |  |
| 2410166I05Rik | 482   | 1.22 | 0.24 | NM_029759.2 |  |
| Pcdhb3        | 281   | 1.22 | 0.47 | NM_053128.1 |  |
| Haghl         | 307   | 1.22 | 0.17 | NM_026897   |  |
| 1810061M12Rik | 72    | 1.22 | 0.22 | XM_135076   |  |
| Slc10a3       | 434   | 1.22 | 0.33 | NM_145406.1 |  |
| Xab1          | 1801  | 1.22 | 0.30 | NM_133756.2 |  |
| Zfp316        | 192   | 1.22 | 0.10 | NM_017467.1 |  |
| Eda2r         | 82    | 1.22 | 0.62 | NM_175540.3 |  |
| Surf4         | 2016  | 1.22 | 0.39 | NM_011512.2 |  |
| Map3k7ip2     | 6196  | 1.22 | 0.07 | NM_138667.1 |  |
| D130051G04Rik | 71    | 1.22 | 0.46 | AK051470    |  |
| BC021438      | 174   | 1.22 | 0.11 | NM_145416   |  |
| Mrps2         | 720   | 1.22 | 0.17 | NM_080452.2 |  |
| Ciapi1        | 601   | 1.22 | 0.32 | NM_134141   |  |
| Rab4b         | 546   | 1.22 | 0.21 | NM_029391.1 |  |
| A230084N10    | 153   | 1.22 | 0.30 |             |  |
| Slc35a4       | 2938  | 1.22 | 0.12 | NM_026404.1 |  |
| Plagl2        | 868   | 1.22 | 0.74 | NM_018807.3 |  |
| E030024L06Rik | 678   | 1.22 | 0.13 | AK053170    |  |
| Cln6          | 355   | 1.22 | 0.63 | XM_134858.5 |  |
| LOC384224     | 42    | 1.22 | 0.55 | XM_357501.1 |  |

|                  |       |      |      |             |  |
|------------------|-------|------|------|-------------|--|
| 1110030C22Rik    | 212   | 1.22 | 0.24 | AK003970    |  |
| Etfa             | 3060  | 1.22 | 0.30 | NM_145615.2 |  |
| D930020B18Rik    | 96    | 1.22 | 0.79 | NM_177335.2 |  |
| Creld1           | 2840  | 1.22 | 0.12 | NM_133930.1 |  |
| Scotin           | 409   | 1.22 | 0.39 | NM_026381.1 |  |
| Cdc2l2           | 2207  | 1.22 | 0.16 | NM_007661.2 |  |
| D130071O13Rik    | 92    | 1.22 | 0.18 | AK051750    |  |
| Hpca             | 35    | 1.22 | 0.75 | NM_010471.2 |  |
| Gm2a             | 1463  | 1.22 | 0.23 | NM_010299.2 |  |
| Hcph             | 617   | 1.22 | 0.47 | NM_013545.1 |  |
| ORF19            | 115   | 1.22 | 0.23 | XM_128709.4 |  |
| Egln2            | 188   | 1.22 | 0.50 | NM_053208.2 |  |
| BC065078         | 330   | 1.22 | 0.11 | NM_201351.1 |  |
| E030027L17       | 316   | 1.22 | 0.19 | NM_183300.1 |  |
| Camk2b           | 1943  | 1.22 | 0.10 | NM_007595.2 |  |
| Tbc1d10a         | 118   | 1.22 | 0.21 |             |  |
| 2610003J06Rik    | 242   | 1.22 | 0.16 | NM_028101.1 |  |
| Wdfy1            | 2048  | 1.22 | 0.18 | NM_027057.1 |  |
| Arf1             | 13859 | 1.22 | 0.32 |             |  |
| Rnf125           | 319   | 1.22 | 0.13 | NM_026301.1 |  |
| 2310005N01Rik    | 353   | 1.22 | 0.15 | NM_027310.1 |  |
| BC008103         | 283   | 1.22 | 0.56 | NM_144898.1 |  |
| Adsl             | 636   | 1.22 | 0.02 | NM_009634.3 |  |
| Ppp1ca           | 9056  | 1.22 | 0.19 | NM_031868.1 |  |
| Trip4            | 60    | 1.22 | 0.25 | NM_019797.2 |  |
| 4930532M18Rik    | 105   | 1.22 | 0.17 | XM_488917   |  |
| C8b              | 144   | 1.22 | 0.29 | NM_133882.1 |  |
| Pomt2            | 875   | 1.22 | 0.24 | NM_153415   |  |
| Slc30a7          | 346   | 1.22 | 0.27 | NM_023214.3 |  |
| E130307M08Rik    | 840   | 1.22 | 0.39 | NM_026530.2 |  |
| H2-Q7            | 414   | 1.22 | 0.15 | NM_010394.1 |  |
| Aldh4a1          | 603   | 1.22 | 0.05 | NM_175438   |  |
| Al663987         | 914   | 1.22 | 0.43 | NM_033526.1 |  |
| Gnptab           | 452   | 1.22 | 0.13 |             |  |
| Dph2l1           | 1407  | 1.22 | 0.11 | NM_144491   |  |
| Il11ra1          | 750   | 1.22 | 0.21 | NM_010549.1 |  |
| scl0003933.1_163 | 2009  | 1.22 | 0.31 |             |  |
| Parp14           | 91    | 1.22 | 0.24 | NM_145481.1 |  |
| DXImx40e         | 1488  | 1.22 | 0.08 | NM_138603.2 |  |
| Mical3           | 270   | 1.22 | 0.23 | NM_153396.1 |  |
| 1700094G20Rik    | 230   | 1.22 | 0.32 | AK007064    |  |
| Al606181         | 501   | 1.22 | 0.05 | NM_183215   |  |
| Cul7             | 577   | 1.22 | 0.23 | XM_358324.1 |  |
| Bicd2            | 652   | 1.22 | 0.18 | NM_029791   |  |
| scl0002720.1_68  | 613   | 1.22 | 0.24 |             |  |
| D430050E20Rik    | 38    | 1.22 | 0.40 |             |  |
| LOC380749        | 936   | 1.22 | 0.34 | XM_354663.1 |  |
| Mdh1             | 241   | 1.22 | 0.24 | NM_008618.2 |  |
| Nelf             | 1214  | 1.22 | 0.14 | AK019560    |  |
| Mgat1            | 85    | 1.22 | 0.56 | NM_010794.2 |  |
| 9626100_15       | 16771 | 1.22 | 0.29 |             |  |
| Slc25a20         | 204   | 1.22 | 0.29 | NM_020520.2 |  |
| Slc14a2          | 44    | 1.22 | 0.26 | NM_030683.1 |  |
| Acp6             | 666   | 1.22 | 0.46 | NM_019800.1 |  |
| scl0004059.1_11  | 2013  | 1.22 | 0.27 |             |  |
| 4921506l22Rik    | 495   | 1.22 | 0.03 | NM_025717   |  |
| 9430003J03Rik    | 56    | 1.22 | 0.38 | AK020400    |  |
| D330018l10Rik    | 50    | 1.22 | 0.70 | AK084592    |  |
| LOC268884        | 68    | 1.22 | 0.19 | XM_193824.2 |  |
| Nrxn2            | 279   | 1.22 | 0.25 | XM_111780   |  |
| Ovca2            | 2353  | 1.22 | 0.22 | NM_027136.2 |  |
| U2af1-rs2        | 833   | 1.22 | 0.13 | NM_178794.2 |  |
| H2afy            | 3760  | 1.22 | 0.21 | BC006955    |  |
| 3830612M24       | 419   | 1.22 | 0.03 |             |  |
| Zranb3           | 2237  | 1.22 | 0.09 | XM_129483.3 |  |
| Anapc4           | 2812  | 1.22 | 0.12 | NM_024213.1 |  |
| Jun              | 1169  | 1.22 | 0.27 | NM_010591.1 |  |
| Rbak             | 229   | 1.22 | 0.21 | NM_021326.1 |  |

|               |       |      |      |             |  |
|---------------|-------|------|------|-------------|--|
| Mrpl9         | 1964  | 1.22 | 0.16 | NM_030116.1 |  |
| Abhd7         | 685   | 1.22 | 0.39 |             |  |
| Eif4b         | 242   | 1.22 | 0.13 | NM_145625.1 |  |
| Cuedc2        | 2109  | 1.22 | 0.35 | NM_024192.1 |  |
| A630097A12Rik | 1714  | 1.22 | 0.38 | AK080401    |  |
| Zc3hc1        | 1104  | 1.22 | 0.11 |             |  |
| 9430065L19Rik | 5401  | 1.22 | 0.19 | AK034952    |  |
| B4galt3       | 1776  | 1.22 | 0.13 | NM_020579.1 |  |
| Rrs1          | 154   | 1.22 | 0.30 | NM_021511.1 |  |
| C330016K18Rik | 112   | 1.22 | 0.11 | XM_132642.4 |  |
| 4930542G03Rik | 10410 | 1.22 | 0.22 | NM_146116.1 |  |
| Meox1         | 262   | 1.22 | 0.49 | NM_010791.3 |  |
| Slc43a2       | 62    | 1.22 | 0.49 |             |  |
| D430030K24Rik | 83    | 1.22 | 0.47 | NM_178732   |  |
| 3830408G03Rik | 769   | 1.22 | 0.13 | AK028353    |  |
| Zadh1         | 422   | 1.22 | 0.08 | NM_029880.1 |  |
| LOC269515     | 948   | 1.22 | 0.40 | XM_196313.1 |  |
| D130017N08Rik | 121   | 1.22 | 0.68 |             |  |
| E230020O17Rik | 82    | 1.22 | 0.11 | AK054118    |  |
| Ctf1          | 779   | 1.22 | 0.37 | NM_007795.1 |  |
| Rab15         | 5328  | 1.21 | 0.14 | NM_134050.2 |  |
| Lman2l        | 1376  | 1.21 | 0.14 | XM_129848.4 |  |
| P4hb          | 32453 | 1.21 | 0.18 | NM_011032.1 |  |
| Palld         | 49    | 1.21 | 0.68 |             |  |
| Mns1          | 3532  | 1.21 | 0.19 | NM_008613.1 |  |
| Brd2          | 3128  | 1.21 | 0.12 | NM_010238.1 |  |
| 2700083E18Rik | 537   | 1.21 | 0.29 |             |  |
| C030004M05Rik | 359   | 1.21 | 0.00 |             |  |
| Nudt5         | 4089  | 1.21 | 0.24 | NM_016918.2 |  |
| LOC211208     | 64    | 1.21 | 0.32 | XM_142112.2 |  |
| Prkrir        | 1268  | 1.21 | 0.36 | NM_028410.1 |  |
| Rras2         | 272   | 1.21 | 0.52 | NM_025846.1 |  |
| D8Ertid587e   | 518   | 1.21 | 0.10 |             |  |
| C130090G16Rik | 44    | 1.21 | 0.07 | AK081969    |  |
| Slc1a7        | 124   | 1.21 | 0.24 | NM_146255.1 |  |
| A630042L21Rik | 2243  | 1.21 | 0.15 | AK041866    |  |
| 4931406C07Rik | 176   | 1.21 | 0.21 | NM_133732.1 |  |
| G6pc3         | 427   | 1.21 | 0.13 | NM_175935.2 |  |
| Rab11b        | 6778  | 1.21 | 0.23 | NM_008997.1 |  |
| Mppe1         | 144   | 1.21 | 0.20 | NM_172630.1 |  |
| AI316807      | 1311  | 1.21 | 0.08 |             |  |
| Pkib          | 562   | 1.21 | 0.31 | NM_008863.2 |  |
| LOC224163     | 8562  | 1.21 | 0.20 | XM_147236.2 |  |
| LOC381091     | 34    | 1.21 | 0.74 | XM_355009.1 |  |
| A930011E24Rik | 62    | 1.21 | 0.53 | AK044408    |  |
| 1110061N23Rik | 3035  | 1.21 | 0.21 | NM_176834.1 |  |
| Ddah2         | 46    | 1.21 | 0.72 | NM_016765   |  |
| Akr1a4        | 11623 | 1.21 | 0.25 | NM_021473.2 |  |
| 2610022K04Rik | 699   | 1.21 | 0.31 | NM_153121.1 |  |
| Terf2ip       | 308   | 1.21 | 0.13 | NM_020584.1 |  |
| LOC381681     | 5808  | 1.21 | 0.34 | XM_355656.1 |  |
| Olfrr618      | 50    | 1.21 | 0.21 | XM_145799.1 |  |
| Taf1c         | 592   | 1.21 | 0.21 | NM_021441.1 |  |
| Elac1         | 374   | 1.21 | 0.08 | NM_053255   |  |
| Rhog          | 389   | 1.21 | 0.33 | NM_019566.2 |  |
| LOC235427     | 67    | 1.21 | 0.07 | XM_134926.4 |  |
| 4921511C16    | 73    | 1.21 | 0.21 | NM_183307.1 |  |
| A830089I03Rik | 247   | 1.21 | 0.31 | AK080681    |  |
| Rc3h1         | 117   | 1.21 | 0.40 |             |  |
| Abcf3         | 1271  | 1.21 | 0.14 | NM_013852   |  |
| LOC218476     | 96    | 1.21 | 0.20 | XM_127483.2 |  |
| B430201G11Rik | 408   | 1.21 | 0.38 | NM_172894   |  |
| E430001K23Rik | 161   | 1.21 | 0.13 | AK087972    |  |
| 2210012G02Rik | 172   | 1.21 | 0.21 | NM_025617.1 |  |
| 2810408M09Rik | 469   | 1.21 | 0.07 |             |  |
| Timm44        | 1194  | 1.21 | 0.14 | NM_011592.1 |  |
| B430104H02Rik | 238   | 1.21 | 0.23 | NM_026568.1 |  |
| LOC385120     | 59    | 1.21 | 0.15 | XM_358068.1 |  |

|                  |       |      |      |             |  |
|------------------|-------|------|------|-------------|--|
| LOC383227        | 947   | 1.21 | 0.46 | XM_356932.1 |  |
| 2310061F22Rik    | 440   | 1.21 | 0.31 | XM_134537.3 |  |
| Dnajb11          | 7211  | 1.21 | 0.09 | XM_148071.1 |  |
| Zfp212           | 671   | 1.21 | 0.16 | NM_145576.1 |  |
| 9130006A14Rik    | 46    | 1.21 | 0.17 | XM_126185   |  |
| Schip1           | 785   | 1.21 | 0.05 | NM_013928.2 |  |
| Atxnf2           | 163   | 1.21 | 0.96 | NM_183020.1 |  |
| Ndfip1           | 3201  | 1.21 | 0.03 | XM_128893.3 |  |
| A530055J02Rik    | 36    | 1.21 | 0.36 | AK080063    |  |
| Cln5             | 1649  | 1.21 | 0.18 | XM_127882.3 |  |
| Mettl2           | 794   | 1.21 | 0.12 | NM_172567.1 |  |
| Pcbp3            | 857   | 1.21 | 0.57 | NM_021568.1 |  |
| Cdc45l           | 852   | 1.21 | 0.02 | NM_009862.1 |  |
| Al854635         | 267   | 1.21 | 0.18 | NM_177565.2 |  |
| Atp5b            | 69799 | 1.21 | 0.18 | NM_016774.2 |  |
| 2610209A20Rik    | 58    | 1.21 | 0.40 | NM_026010.1 |  |
| Sfrs14           | 1086  | 1.21 | 0.16 | NM_172755.2 |  |
| AW538196         | 1117  | 1.21 | 0.10 | NM_133952.1 |  |
| mtDNA_CytB       | 71731 | 1.21 | 0.19 |             |  |
| BC023296         | 156   | 1.21 | 0.10 | NM_153545.1 |  |
| Eme2             | 120   | 1.21 | 0.20 | XM_128555.4 |  |
| scl000059.1_14_F | 62    | 1.21 | 0.41 |             |  |
| D330004O07Rik    | 181   | 1.21 | 0.12 |             |  |
| C330018D20Rik    | 758   | 1.21 | 0.17 | XM_128980   |  |
| Pold1            | 2567  | 1.21 | 0.16 | NM_011131.2 |  |
| Mras             | 146   | 1.21 | 0.07 | NM_008624.2 |  |
| 5830411K18Rik    | 1691  | 1.21 | 0.04 | XM_357252   |  |
| LOC385919        | 50    | 1.21 | 0.31 | XM_358998.1 |  |
| BC019367         | 353   | 1.21 | 0.30 | NM_138675.2 |  |
| 4930451E10Rik    | 39    | 1.21 | 0.43 | NM_183130.1 |  |
| Rraga            | 58    | 1.21 | 0.19 | NM_178376.2 |  |
| Copeb            | 707   | 1.21 | 0.05 | NM_011803.1 |  |
| Dom3z            | 693   | 1.21 | 0.25 | NM_033613.1 |  |
| Rin3             | 1433  | 1.21 | 0.50 | NM_177620.2 |  |
| Rbm3             | 2749  | 1.21 | 0.30 | NM_016809.2 |  |
| 4921507I02Rik    | 36    | 1.21 | 0.57 | XM_131022.4 |  |
| LOC384607        | 372   | 1.21 | 0.28 | XM_357740.1 |  |
| 1010001N08Rik    | 61    | 1.21 | 0.27 | XM_488841   |  |
| Klh123           | 38    | 1.21 | 0.29 |             |  |
| Gpd1             | 44    | 1.21 | 0.74 | NM_010271.2 |  |
| 0610011N22Rik    | 659   | 1.21 | 0.07 | NM_024201.2 |  |
| Sirt7            | 5683  | 1.21 | 0.02 | NM_153056.1 |  |
| St3gal3          | 621   | 1.21 | 0.18 |             |  |
| 4932409I22Rik    | 1709  | 1.21 | 0.33 | NM_198614.1 |  |
| Ctsb             | 4894  | 1.21 | 0.11 | NM_007798.1 |  |
| OTTMUSG000000    | 70    | 1.21 | 0.44 |             |  |
| D330023A14Rik    | 85    | 1.21 | 0.44 | AK052300    |  |
| 5430417L22Rik    | 4678  | 1.21 | 0.26 |             |  |
| Stk24            | 589   | 1.21 | 0.09 | NM_145465.1 |  |
| 1700020B09Rik    | 71    | 1.21 | 0.48 | NM_175240.2 |  |
| D930048N14Rik    | 110   | 1.21 | 0.37 | NM_175289.2 |  |
| Ywhag            | 4315  | 1.21 | 0.09 | NM_018871.2 |  |
| Luzp1            | 1743  | 1.21 | 0.10 | NM_024452.1 |  |
| Rbm28            | 1560  | 1.21 | 0.05 | NM_133925   |  |
| LOC385414        | 57    | 1.21 | 0.19 | XM_358230.1 |  |
| Tbcc             | 43    | 1.21 | 0.33 | NM_178385.2 |  |
| lsg20            | 714   | 1.21 | 0.19 | NM_020583.4 |  |
| Aatf             | 1334  | 1.21 | 0.25 | NM_019816.1 |  |
| Slc15a4          | 653   | 1.21 | 0.19 | NM_133895.1 |  |
| 8030466O12Rik    | 660   | 1.21 | 0.05 | NM_146203   |  |
| X83328           | 3231  | 1.21 | 0.28 | NM_025275.2 |  |
| 9130001M19Rik    | 502   | 1.21 | 0.03 | XM_147946.3 |  |
| B930032P17Rik    | 115   | 1.21 | 0.23 | AK047187    |  |
| 0710007G10Rik    | 246   | 1.21 | 0.56 |             |  |
| A730008I18Rik    | 232   | 1.21 | 0.27 | AK042590    |  |
| 9330187M14Rik    | 339   | 1.21 | 0.27 | NM_172583.2 |  |
| Myh9             | 1811  | 1.21 | 0.11 | NM_022410.1 |  |
| 1810057E01Rik    | 352   | 1.21 | 0.34 | NM_030749.1 |  |

|                  |      |      |      |             |  |
|------------------|------|------|------|-------------|--|
| Olf1386          | 58   | 1.21 | 0.37 |             |  |
| 4933424M23Rik    | 7111 | 1.21 | 0.08 | XM_181351.3 |  |
| Abhd14b          | 1493 | 1.21 | 0.22 |             |  |
| Txnrd2           | 1799 | 1.21 | 0.12 | NM_013711.1 |  |
| Tmem9            | 1735 | 1.21 | 0.11 | NM_025439.2 |  |
| D330004B08Rik    | 39   | 1.21 | 0.48 | AK052181    |  |
| 6530402N02Rik    | 292  | 1.21 | 0.26 | NM_146104.1 |  |
| Oat              | 7878 | 1.21 | 0.22 | NM_016978.1 |  |
| Crybb1           | 123  | 1.21 | 0.16 | NM_023695.1 |  |
| 2310003C23Rik    | 1252 | 1.21 | 0.34 | XM_130746.2 |  |
| 2810407K09Rik    | 374  | 1.21 | 0.43 | NM_026999.1 |  |
| AA408296         | 722  | 1.21 | 0.08 | NM_145415.1 |  |
| LOC380756        | 217  | 1.21 | 0.09 | XM_354669.1 |  |
| Klhl15           | 280  | 1.21 | 0.05 | NM_153165.1 |  |
| Echdc3           | 44   | 1.21 | 0.56 | NM_024208.3 |  |
| Tm9sf4           | 906  | 1.21 | 0.24 | NM_133847.2 |  |
| LOC219145        | 1569 | 1.21 | 0.25 | XM_122761.3 |  |
| Pex6             | 734  | 1.21 | 0.14 | NM_145488.1 |  |
| Syt1             | 162  | 1.21 | 0.19 | NM_031393.1 |  |
| Limk1            | 1057 | 1.21 | 0.28 | NM_010717.1 |  |
| Csk              | 965  | 1.21 | 0.17 | NM_007783.2 |  |
| LOC384596        | 33   | 1.21 | 0.46 | XM_357735.1 |  |
| LOC380655        | 74   | 1.21 | 0.08 | XM_358397.1 |  |
| 1110029E03Rik    | 131  | 1.21 | 0.35 | NM_172866   |  |
| Glrx             | 172  | 1.21 | 0.38 |             |  |
| Kin              | 607  | 1.21 | 0.31 | NM_025280.1 |  |
| Ttc35            | 2299 | 1.21 | 0.34 |             |  |
| Csnk1g2          | 4437 | 1.21 | 0.14 | NM_134002.1 |  |
| LOC384434        | 317  | 1.21 | 0.11 | XM_357646.1 |  |
| BC057022         | 50   | 1.21 | 0.02 |             |  |
| 1200004M23Rik    | 43   | 1.21 | 0.52 | NM_026169   |  |
| Tcf14            | 162  | 1.21 | 0.14 | NM_011550.2 |  |
| Polr3e           | 96   | 1.21 | 0.56 | NM_025298.2 |  |
| Cyb5r3           | 1865 | 1.21 | 0.45 |             |  |
| scl0002855.1_105 | 347  | 1.21 | 0.20 |             |  |
| Rdh14            | 1002 | 1.20 | 0.20 | NM_023697.1 |  |
| Slco3a1          | 152  | 1.20 | 0.13 | NM_023908   |  |
| Tek              | 43   | 1.20 | 0.55 | NM_013690.1 |  |
| Sema4f           | 123  | 1.20 | 0.30 | AK047067    |  |
| Il13             | 89   | 1.20 | 0.24 | NM_008355.1 |  |
| Got1             | 436  | 1.20 | 0.13 | NM_010324.1 |  |
| 1700008D07Rik    | 180  | 1.20 | 0.31 | XM_485969   |  |
| Tmem38b          | 766  | 1.20 | 0.22 |             |  |
| Eif2b1           | 2641 | 1.20 | 0.12 | NM_145371.1 |  |
| Catsper2         | 142  | 1.20 | 0.21 | NM_153075.1 |  |
| Lisch7           | 950  | 1.20 | 0.46 | NM_017405.1 |  |
| Ppt1             | 250  | 1.20 | 0.20 | NM_008917.1 |  |
| LOC382376        | 40   | 1.20 | 0.18 | XM_356471.1 |  |
| Ephb2            | 306  | 1.20 | 0.17 | AK017630    |  |
| 0610037H22Rik    | 427  | 1.20 | 0.14 | NM_025332   |  |
| 2810405J04Rik    | 5579 | 1.20 | 0.28 | NM_133747.1 |  |
| D930024N12Rik    | 145  | 1.20 | 0.14 | AK086384    |  |
| S100a14          | 42   | 1.20 | 0.16 | NM_025393   |  |
| Adssl1           | 147  | 1.20 | 0.21 | NM_007421.1 |  |
| Hmgb1            | 628  | 1.20 | 0.12 | NM_010439.2 |  |
| LOC380919        | 75   | 1.20 | 0.19 | XM_358463.1 |  |
| 1500011H22Rik    | 2710 | 1.20 | 0.35 | NM_026883   |  |
| AA536743         | 1008 | 1.20 | 0.21 | NM_145923   |  |
| Pelo             | 1908 | 1.20 | 0.10 | NM_134058.1 |  |
| C530043G21Rik    | 2691 | 1.20 | 0.10 | NM_145413.2 |  |
| 6530401D17Rik    | 1737 | 1.20 | 0.37 | NM_029541.1 |  |
| Pir              | 122  | 1.20 | 0.59 | XM_136134.3 |  |
| Gabpb2           | 71   | 1.20 | 0.21 | NM_172512.1 |  |
| Gusb             | 2461 | 1.20 | 0.10 |             |  |
| Mrpl1            | 850  | 1.20 | 0.07 | NM_053158.1 |  |
| Srd5a2l          | 694  | 1.20 | 0.33 | NM_020611.3 |  |
| 1110007M04Rik    | 2890 | 1.20 | 0.10 | NM_026742.1 |  |
| 5430400N05Rik    | 148  | 1.20 | 0.41 | NM_175433.4 |  |

|                |       |      |      |             |  |
|----------------|-------|------|------|-------------|--|
| Amid           | 449   | 1.20 | 0.15 | NM_178058.2 |  |
| Samd8          | 154   | 1.20 | 0.07 | NM_026283.1 |  |
| Helb           | 638   | 1.20 | 0.24 | NM_080446.1 |  |
| 2610034E13Rik  | 235   | 1.20 | 0.61 | NM_029365   |  |
| Catnbip1       | 4933  | 1.20 | 0.27 | NM_023465.2 |  |
| Apg10l         | 422   | 1.20 | 0.22 | NM_025770.2 |  |
| Thap4          | 732   | 1.20 | 0.28 | NM_025920   |  |
| D17Wsu155e     | 103   | 1.20 | 0.31 | NM_181392.1 |  |
| A930031F18Rik  | 177   | 1.20 | 0.30 | NM_029992.1 |  |
| Fbxw17         | 1040  | 1.20 | 0.10 | NM_175401.2 |  |
| 1110053F04Rik  | 101   | 1.20 | 0.60 |             |  |
| 6330414G21Rik  | 389   | 1.20 | 0.14 | NM_178110.2 |  |
| Bop1           | 1009  | 1.20 | 0.23 | NM_013481.1 |  |
| 1810009H17Rik  | 276   | 1.20 | 0.36 | XM_283205.1 |  |
| Hnrpc          | 10104 | 1.20 | 0.23 | NM_016884   |  |
| Pkm2           | 4789  | 1.20 | 0.15 | NM_011099.2 |  |
| LOC383475      | 112   | 1.20 | 0.11 | XM_357086.1 |  |
| Cdk5rap3       | 5830  | 1.20 | 0.11 | NM_030248.1 |  |
| BC025076       | 661   | 1.20 | 0.31 | NM_175002.1 |  |
| LOC382645      | 165   | 1.20 | 0.11 | XM_356603.1 |  |
| Kcnj3          | 162   | 1.20 | 0.32 | NM_008426   |  |
| scl000416.1_19 | 1912  | 1.20 | 0.39 |             |  |
| Till1          | 133   | 1.20 | 0.18 | NM_178869.2 |  |
| Sspn           | 252   | 1.20 | 0.16 | NM_010656.1 |  |
| Lyar           | 313   | 1.20 | 0.30 | NM_025281.1 |  |
| C78915         | 1216  | 1.20 | 0.21 | NM_019704   |  |
| Mikl           | 595   | 1.20 | 0.17 |             |  |
| Pigw           | 36    | 1.20 | 0.28 | NM_027388.1 |  |
| Ing1           | 336   | 1.20 | 0.28 | NM_011919.3 |  |
| Cad            | 798   | 1.20 | 0.22 | XM_131981.5 |  |
| Al462438       | 217   | 1.20 | 0.29 | NM_133840.1 |  |
| 6330408J11Rik  | 37    | 1.20 | 0.34 | AK018143    |  |
| Lgals3bp       | 2903  | 1.20 | 0.48 | NM_011150.1 |  |
| Sema4a         | 161   | 1.20 | 0.17 | NM_013658.2 |  |
| LOC385627      | 52    | 1.20 | 0.33 | XM_358807.1 |  |
| Ogdh           | 456   | 1.20 | 0.04 | NM_010956.1 |  |
| Katnal1        | 269   | 1.20 | 0.29 | NM_153572.1 |  |
| St13           | 730   | 1.20 | 0.12 | NM_133726.1 |  |
| AW123240       | 545   | 1.20 | 0.11 |             |  |
| Mrpl51         | 158   | 1.20 | 0.08 | NM_025595.1 |  |
| Naga           | 86    | 1.20 | 0.22 | NM_008669.2 |  |
| Pdcd1lg1       | 512   | 1.20 | 0.14 | NM_021893.2 |  |
| 2610511O17Rik  | 2599  | 1.20 | 0.14 | NM_152817.2 |  |
| LOC383809      | 293   | 1.20 | 0.34 | XM_357269.1 |  |
| Lmna           | 2918  | 1.20 | 0.16 | NM_019390.1 |  |
| Bat4           | 161   | 1.20 | 0.29 | NM_032460   |  |
| 2610002I17Rik  | 263   | 1.20 | 0.11 | XM_135177.4 |  |
| Rnps1          | 1903  | 1.20 | 0.19 | NM_009070.1 |  |
| Txnrd3         | 481   | 1.20 | 0.20 | NM_153162.2 |  |
| 2810410C14Rik  | 58    | 1.20 | 0.15 | NM_175471   |  |
| Parp1          | 2267  | 1.20 | 0.24 |             |  |
| LOC385626      | 58    | 1.20 | 0.14 | XM_358806.1 |  |
| Zic1           | 72    | 1.20 | 0.62 | NM_009573.2 |  |
| LOC270186      | 1051  | 1.20 | 0.28 | XM_194481.2 |  |
| Idb2           | 2360  | 1.20 | 0.35 | NM_010496.2 |  |
| Pcdhb1         | 45    | 1.20 | 0.38 | NM_053126.1 |  |
| A730075L14Rik  | 58    | 1.20 | 0.27 | AK043246    |  |
| Dctd           | 1113  | 1.20 | 0.27 | NM_178788.2 |  |
| 6330442E10Rik  | 280   | 1.20 | 0.06 | NM_178745.3 |  |
| Qtrtd1         | 456   | 1.20 | 0.26 | XM_148491.1 |  |
| D12Etd553e     | 1457  | 1.20 | 0.19 | NM_029758.3 |  |
| Rbks           | 260   | 1.20 | 0.47 | NM_153196.1 |  |
| 4933407I08Rik  | 78    | 1.20 | 0.30 |             |  |
| Adh5           | 257   | 1.20 | 0.07 | NM_007410.2 |  |
| Mint           | 219   | 1.20 | 0.44 | NM_019763.1 |  |
| Btbd16         | 54    | 1.20 | 0.09 |             |  |
| 4631405J19Rik  | 63    | 1.20 | 0.13 | AK028444    |  |
| Cenpp          | 563   | 1.20 | 0.40 |             |  |



|                 |      |      |      |              |  |
|-----------------|------|------|------|--------------|--|
| Fzd7            | 148  | 1.20 | 0.04 | XM_123681.1  |  |
| Pfn2            | 1678 | 1.20 | 0.34 | NM_019410.2  |  |
| scl0003176.1_43 | 76   | 1.20 | 0.22 |              |  |
| Cops3           | 4588 | 1.20 | 0.23 | AK048906     |  |
| Cappa3          | 54   | 1.20 | 0.56 | AK005949     |  |
| Zfp295          | 682  | 1.20 | 0.09 | NM_175428.2  |  |
| Ddb1            | 415  | 1.20 | 0.05 | NM_015735.1  |  |
| E4f1            | 216  | 1.20 | 0.22 | NM_007893.1  |  |
| Itgb1           | 322  | 1.20 | 0.21 | NM_010578.1  |  |
| Pank2           | 1554 | 1.20 | 0.11 | NM_153501.1  |  |
| Tmem143         | 208  | 1.20 | 0.32 |              |  |
| Cngb3           | 44   | 1.20 | 0.74 | NM_013927.1  |  |
| 2310057D15Rik   | 1865 | 1.20 | 0.18 | NM_026421.1  |  |
| LOC381788       | 131  | 1.20 | 0.07 | XM_355788.1  |  |
| 4833412N02Rik   | 214  | 1.20 | 0.16 | AK014688     |  |
| Plekha6         | 210  | 1.20 | 0.09 | NM_182930    |  |
| N4wbp5-pending  | 3191 | 1.20 | 0.14 | AK050560     |  |
| Mapre1          | 6492 | 1.20 | 0.09 | NM_007896.2  |  |
| 9430063L05Rik   | 489  | 1.20 | 0.31 | NM_178080.3  |  |
| Arhgap30        | 1808 | 1.20 | 0.19 |              |  |
| Frrs1           | 398  | 1.20 | 0.17 |              |  |
| Snx3            | 386  | 1.20 | 0.15 | NM_017472.2  |  |
| Phf7            | 343  | 1.20 | 0.26 | NM_027949.1  |  |
| 9430023P16Rik   | 2284 | 1.20 | 0.26 | NM_001005507 |  |
| D3Erttd300e     | 105  | 1.20 | 0.04 | NM_019995.1  |  |
| Cdk4            | 1613 | 1.20 | 0.03 | NM_009870.2  |  |
| Pdcd4           | 1399 | 1.20 | 0.22 | NM_011050.1  |  |
| Cdkn2c          | 1127 | 1.19 | 0.30 | NM_007671.2  |  |
| Olf608          | 42   | 1.19 | 0.49 | NM_146756    |  |
| Grtp1           | 45   | 1.19 | 0.54 | NM_025768.1  |  |
| Nol10           | 2487 | 1.19 | 0.24 |              |  |
| 4732437J24Rik   | 1194 | 1.19 | 0.21 | NM_172338.1  |  |
| Pfkm            | 642  | 1.19 | 0.23 | NM_021514.2  |  |
| Hsf1            | 3617 | 1.19 | 0.12 | NM_008296    |  |
| Tle3            | 79   | 1.19 | 0.40 | NM_009389.1  |  |
| Degs            | 5373 | 1.19 | 0.01 | NM_007853.2  |  |
| 2610304F09Rik   | 841  | 1.19 | 0.20 | NM_172965    |  |
| Plvap           | 54   | 1.19 | 0.38 | NM_032398.1  |  |
| 4933404K08Rik   | 235  | 1.19 | 0.05 |              |  |
| 1190005P17Rik   | 443  | 1.19 | 0.06 | NM_025431.2  |  |
| Ilf2            | 2548 | 1.19 | 0.35 | AK031892     |  |
| E130306D19Rik   | 491  | 1.19 | 0.32 | XM_131404.3  |  |
| Aclp7           | 60   | 1.19 | 0.25 | AK089453     |  |
| Glrx1           | 95   | 1.19 | 0.16 | NM_053108    |  |
| Nagpa           | 135  | 1.19 | 0.16 | NM_013796.1  |  |
| Fbxl14          | 1841 | 1.19 | 0.08 | NM_133940    |  |
| Stmn1           | 1565 | 1.19 | 0.36 | NM_019641    |  |
| Rkhd1           | 47   | 1.19 | 0.69 | NM_198615.1  |  |
| Phc2            | 3847 | 1.19 | 0.21 | BC071246     |  |
| 1500002I11Rik   | 996  | 1.19 | 0.08 | NM_021550.2  |  |
| Gtf2f2          | 3933 | 1.19 | 0.17 | NM_026816.1  |  |
| Gm484           | 170  | 1.19 | 0.05 |              |  |
| Prpsap1         | 319  | 1.19 | 0.32 | XM_181343.1  |  |
| Oaz2            | 1399 | 1.19 | 0.23 | NM_010952.2  |  |
| 1700023B02Rik   | 444  | 1.19 | 0.17 | NM_025854.1  |  |
| 3110031I02Rik   | 40   | 1.19 | 0.12 | AK014104     |  |
| Ipo13           | 2133 | 1.19 | 0.16 | NM_146152.2  |  |
| Uchl1           | 3376 | 1.19 | 0.40 | NM_011670.1  |  |
| LOC218452       | 43   | 1.19 | 0.61 | XM_147780.2  |  |
| Igsf9b          | 37   | 1.19 | 0.32 |              |  |
| Ube2j2          | 241  | 1.19 | 0.30 | NM_021402.4  |  |
| Srfbp1          | 984  | 1.19 | 0.00 |              |  |
| 9530090G24Rik   | 3812 | 1.19 | 0.10 | NM_145537    |  |
| Al849286        | 2506 | 1.19 | 0.04 | XM_194372.3  |  |
| Cecr5           | 227  | 1.19 | 0.33 | NM_144815.1  |  |
| 4833429E21Rik   | 1451 | 1.19 | 0.13 | AK029394     |  |
| Nsun2           | 202  | 1.19 | 0.15 | NM_145354.2  |  |
| Hbxap           | 204  | 1.19 | 0.70 | XM_133622.3  |  |

|               |       |      |      |              |  |
|---------------|-------|------|------|--------------|--|
| Olf330        | 99    | 1.19 | 0.44 | NM_146879.1  |  |
| Rhobtb2       | 193   | 1.19 | 0.04 | NM_153514.3  |  |
| 9130022B02Rik | 32    | 1.19 | 0.64 | AK018642     |  |
| C330027I04Rik | 1369  | 1.19 | 0.24 | NM_026561.2  |  |
| 5033428A16Rik | 480   | 1.19 | 0.18 | NM_029074    |  |
| 1110030H18Rik | 698   | 1.19 | 0.18 | XM_149659.3  |  |
| 2310005O14Rik | 1155  | 1.19 | 0.26 | NM_026452    |  |
| Slc6a12       | 113   | 1.19 | 0.29 | NM_133661.1  |  |
| 3110070M22Rik | 67    | 1.19 | 0.35 | NM_026084.1  |  |
| B930010D08Rik | 153   | 1.19 | 0.26 | AK046997     |  |
| A130022L12Rik | 37    | 1.19 | 0.27 | AK037510     |  |
| 1110003O08Rik | 1249  | 1.19 | 0.14 |              |  |
| Pigo          | 362   | 1.19 | 0.03 | NM_020035.1  |  |
| Cchcr1        | 411   | 1.19 | 0.18 |              |  |
| BC012016      | 34    | 1.19 | 0.29 | NM_144809.1  |  |
| Bzw2          | 7823  | 1.19 | 0.18 | NM_025840.2  |  |
| Rnuxa         | 1443  | 1.19 | 0.16 |              |  |
| Pola2         | 544   | 1.19 | 0.14 | NM_008893.2  |  |
| 2600016J21Rik | 109   | 1.19 | 0.07 | NM_133744.2  |  |
| Rpl4          | 570   | 1.19 | 0.07 | NM_024212.2  |  |
| 0610009D07Rik | 71    | 1.19 | 0.21 | AK020052     |  |
| Txn14b        | 354   | 1.19 | 0.14 | NM_175646.2  |  |
| Acot2         | 97    | 1.19 | 0.12 |              |  |
| 5730409F24Rik | 127   | 1.19 | 0.28 | NM_181403.2  |  |
| 4933427E11Rik | 48    | 1.19 | 0.38 | NM_025756.1  |  |
| Comtd1        | 72    | 1.19 | 0.14 | NM_026965.1  |  |
| B230104P22Rik | 432   | 1.19 | 0.15 | NM_001004363 |  |
| Dnaja3        | 2026  | 1.19 | 0.09 | AK007852     |  |
| 4921513O20Rik | 33    | 1.19 | 0.67 | XM_283303.1  |  |
| 2500001K11Rik | 3459  | 1.19 | 0.22 | NM_146103    |  |
| Tomm34        | 2116  | 1.19 | 0.30 | NM_025996.1  |  |
| Fgd3          | 41    | 1.19 | 0.31 | NM_015759.1  |  |
| Fbxl6         | 1070  | 1.19 | 0.35 | NM_013909    |  |
| Gbif          | 1895  | 1.19 | 0.07 | NM_019683.2  |  |
| 0610037D15Rik | 203   | 1.19 | 0.34 | NM_026714.1  |  |
| Siah1b        | 318   | 1.19 | 0.14 | NM_009173.1  |  |
| BC028278      | 2167  | 1.19 | 0.31 | XM_130696.2  |  |
| B430305P08Rik | 172   | 1.19 | 0.35 | XM_148123.1  |  |
| Phf23         | 113   | 1.19 | 0.27 |              |  |
| Slc1a6        | 69    | 1.19 | 0.12 | NM_009200.1  |  |
| Smoc1         | 4807  | 1.19 | 0.16 | NM_022316.1  |  |
| Pk3           | 89    | 1.19 | 0.40 | AK083076     |  |
| Chgb          | 16134 | 1.19 | 0.32 | NM_007694.1  |  |
| Gm50          | 1305  | 1.19 | 0.05 |              |  |
| Ddx6          | 489   | 1.19 | 0.05 | NM_007841.2  |  |
| 1300018P11Rik | 754   | 1.19 | 0.25 | NM_025829.2  |  |
| LOC384723     | 40    | 1.19 | 0.29 | XM_357817.1  |  |
| 1110005A23Rik | 269   | 1.19 | 0.17 | NM_025364    |  |
| Alk           | 111   | 1.19 | 0.51 | AK051358     |  |
| BC030335      | 131   | 1.19 | 0.11 | NM_173408    |  |
| A130020K16Rik | 57    | 1.19 | 0.44 | AK037473     |  |
| Nup85         | 1921  | 1.19 | 0.03 |              |  |
| Hnrpab        | 14646 | 1.19 | 0.19 | NM_010448.2  |  |
| 2310005E10Rik | 329   | 1.19 | 0.18 | NM_172398.2  |  |
| D15Ert682e    | 622   | 1.19 | 0.13 |              |  |
| 1700028D13Rik | 54    | 1.19 | 0.19 |              |  |
| Nkd2          | 45    | 1.19 | 0.05 | NM_028186    |  |
| Tra2a         | 2853  | 1.19 | 0.16 |              |  |
| Tfip11        | 760   | 1.19 | 0.15 | NM_018783.3  |  |
| 2410004L22Rik | 617   | 1.19 | 0.48 | NM_029621.1  |  |
| Zdhhc7        | 2319  | 1.19 | 0.12 | NM_133967.2  |  |
| Prei3         | 508   | 1.19 | 0.12 | NM_025283    |  |
| Tst           | 631   | 1.19 | 0.49 | NM_009437.2  |  |
| Calm2         | 2082  | 1.19 | 0.26 | NM_007589    |  |
| 3300001P08Rik | 5981  | 1.19 | 0.03 | NM_026313.1  |  |
| Olf33         | 47    | 1.19 | 0.41 | NM_146831.1  |  |
| Polr3b        | 683   | 1.19 | 0.15 | NM_027423.1  |  |
| Glo1          | 2518  | 1.19 | 0.12 | NM_025374.2  |  |

|                |       |      |      |             |  |
|----------------|-------|------|------|-------------|--|
| Prkaca         | 998   | 1.19 | 0.79 | NM_008854.3 |  |
| Shmt2          | 1472  | 1.19 | 0.18 | NM_028230.2 |  |
| Aldh5a1        | 299   | 1.19 | 0.22 | NM_172532.1 |  |
| D15Ert405e     | 1638  | 1.19 | 0.34 | NM_201359.1 |  |
| Dek            | 1164  | 1.19 | 0.15 | NM_025900.1 |  |
| Ppp1r3f        | 135   | 1.19 | 0.23 | NM_138605   |  |
| 2310014H01Rik  | 1717  | 1.19 | 0.08 | XM_355011.1 |  |
| Drg2           | 1618  | 1.19 | 0.31 | NM_021354.1 |  |
| H1f0           | 1172  | 1.19 | 0.31 | NM_008197.2 |  |
| B3gnt3         | 239   | 1.19 | 0.08 | NM_028189   |  |
| LOC329302      | 209   | 1.19 | 0.12 | XM_283676.2 |  |
| Nudc-ps1       | 622   | 1.19 | 0.53 |             |  |
| Ube2q          | 1941  | 1.19 | 0.06 | NM_027315   |  |
| 2410091C18Rik  | 318   | 1.19 | 0.11 | NM_028611.1 |  |
| Ilk            | 1056  | 1.19 | 0.48 | NM_010562.1 |  |
| G22p1          | 2719  | 1.19 | 0.00 | NM_010247.1 |  |
| Bcl9           | 72    | 1.19 | 0.59 | XM_358351   |  |
| Aldoa          | 13938 | 1.19 | 0.22 | NM_007438.2 |  |
| LOC382707      | 398   | 1.19 | 0.09 | XM_356635.1 |  |
| Pip5k1c        | 414   | 1.19 | 0.09 | NM_008844.1 |  |
| LOC386067      | 5443  | 1.19 | 0.25 | XM_359051.1 |  |
| Ppp2r5d        | 589   | 1.19 | 0.15 | NM_009358.2 |  |
| Aars           | 3696  | 1.19 | 0.04 | NM_146217.3 |  |
| P140           | 136   | 1.19 | 0.30 | NM_018873   |  |
| CDKN2A_p16_Ink | 42    | 1.19 | 0.20 |             |  |
| Zadh2          | 826   | 1.19 | 0.10 | NM_146090.2 |  |
| Gtf2h3         | 2033  | 1.19 | 0.02 | NM_181410.2 |  |
| Sall1          | 107   | 1.19 | 0.18 | NM_021390.2 |  |
| Tysnd1         | 283   | 1.19 | 0.29 | XM_125636.1 |  |
| Tsc22d3        | 1261  | 1.19 | 0.29 |             |  |
| C820018A03Rik  | 35    | 1.19 | 0.30 | AK050559    |  |
| 5730537H01Rik  | 294   | 1.19 | 0.18 | XM_140308.2 |  |
| mtDNA_ATP6     | 66567 | 1.19 | 0.13 |             |  |
| 5330432E05Rik  | 37    | 1.19 | 0.74 | AK030563    |  |
| 1500031N24Rik  | 340   | 1.19 | 0.23 | XM_128010.4 |  |
| 6720467C03Rik  | 2366  | 1.19 | 0.41 | BC055848    |  |
| Tapbp          | 171   | 1.19 | 0.25 | NM_009318.1 |  |
| Agl            | 75    | 1.19 | 0.52 | AK028678    |  |
| LOC241715      | 274   | 1.19 | 0.24 | XM_141432.3 |  |
| LOC380706      | 39    | 1.19 | 0.31 | XM_354621.1 |  |
| Armcx2         | 6418  | 1.19 | 0.15 | NM_026139.2 |  |
| Chmp7          | 412   | 1.19 | 0.08 |             |  |
| Zfp524         | 367   | 1.19 | 0.29 | NM_025324.1 |  |
| 1810037O03Rik  | 75    | 1.19 | 0.23 | XM_129446.2 |  |
| Ttc1           | 670   | 1.19 | 0.04 | NM_133795.1 |  |
| Zfp277         | 1016  | 1.19 | 0.20 | NM_172575.1 |  |
| 5730409G15Rik  | 459   | 1.19 | 0.21 | XM_358756.1 |  |
| Sf3a3          | 5469  | 1.19 | 0.05 | NM_029157.2 |  |
| Bcas2          | 1898  | 1.19 | 0.12 | NM_026602.1 |  |
| Lrrfip2        | 214   | 1.19 | 0.22 | XM_284541.1 |  |
| C630015B10Rik  | 70    | 1.19 | 0.25 | AK083112    |  |
| Psg23          | 32071 | 1.19 | 0.14 | NM_020261   |  |
| Git25d1        | 2457  | 1.19 | 0.17 | NM_146211   |  |
| Solh           | 391   | 1.19 | 0.47 | NM_015830   |  |
| Nek8           | 123   | 1.19 | 0.04 | NM_080849.2 |  |
| LOC383607      | 40    | 1.18 | 0.68 | XM_357150.1 |  |
| Poll           | 380   | 1.18 | 0.09 | NM_020032.1 |  |
| Mapk13         | 928   | 1.18 | 0.29 | NM_011950.1 |  |
| 2310061J03Rik  | 252   | 1.18 | 0.60 | XM_148411.1 |  |
| A230065G10Rik  | 64    | 1.18 | 0.21 | AK038814    |  |
| Smfn           | 309   | 1.18 | 0.44 | NM_024233.2 |  |
| Stk40          | 348   | 1.18 | 0.27 |             |  |
| Ugcgl1         | 7982  | 1.18 | 0.13 | NM_198899.1 |  |
| Xrcc1          | 544   | 1.18 | 0.39 | AK046611    |  |
| 9330159N05Rik  | 62    | 1.18 | 0.21 |             |  |
| Etv3           | 175   | 1.18 | 0.10 | NM_012051.2 |  |
| Plek2          | 559   | 1.18 | 0.47 | NM_013738   |  |
| Atf3           | 739   | 1.18 | 0.15 | NM_007498.2 |  |

|               |       |      |      |             |  |
|---------------|-------|------|------|-------------|--|
| Whsc2         | 802   | 1.18 | 0.09 | NM_011914.1 |  |
| Mapk8ip2      | 699   | 1.18 | 0.16 | NM_021921   |  |
| D11Wsu47e     | 843   | 1.18 | 0.15 | NM_177777.3 |  |
| E430005I09Rik | 7816  | 1.18 | 0.37 | AK088176    |  |
| Cltb          | 1213  | 1.18 | 0.29 | NM_028870.1 |  |
| 8430421H08Rik | 52    | 1.18 | 0.39 |             |  |
| Hist1h3e      | 148   | 1.18 | 0.33 | NM_178205   |  |
| 0610009K11Rik | 1050  | 1.18 | 0.28 | NM_026689.3 |  |
| Sart3         | 3906  | 1.18 | 0.04 | NM_016926.1 |  |
| 1110003P22Rik | 980   | 1.18 | 0.09 | NM_144522   |  |
| Parp16        | 190   | 1.18 | 0.21 | NM_177460.3 |  |
| Ppp2r3a       | 47    | 1.18 | 0.20 | XM_356255   |  |
| Pip5k2b       | 578   | 1.18 | 0.41 | NM_054051.1 |  |
| 1110012F10Rik | 274   | 1.18 | 0.23 | AK003630    |  |
| 2610103J23Rik | 2076  | 1.18 | 0.09 | AK011808    |  |
| 2610318I18Rik | 451   | 1.18 | 0.32 | NM_145479.2 |  |
| BC029169      | 909   | 1.18 | 0.18 | NM_153782.1 |  |
| Acadvl        | 1240  | 1.18 | 0.20 | NM_017366   |  |
| Al848100      | 671   | 1.18 | 0.14 | XM_484932   |  |
| Asb13         | 877   | 1.18 | 0.19 | NM_080857.1 |  |
| Rnpepl1       | 12038 | 1.18 | 0.06 | NM_181405.2 |  |
| Cnih          | 1267  | 1.18 | 0.27 | NM_009919   |  |
| Trim11        | 115   | 1.18 | 0.46 | NM_053168.1 |  |
| Es2el         | 490   | 1.18 | 0.24 | NM_022408.1 |  |
| Gng5          | 79    | 1.18 | 0.38 | NM_010318.1 |  |
| 39700         | 1075  | 1.18 | 0.26 |             |  |
| Hoxd13        | 45    | 1.18 | 0.17 | NM_008275.1 |  |
| Gga1          | 157   | 1.18 | 0.32 | NM_145929.1 |  |
| Serinc2       | 1307  | 1.18 | 0.28 |             |  |
| Cntf          | 332   | 1.18 | 0.21 | NM_170786.1 |  |
| Olfm1         | 693   | 1.18 | 0.21 | NM_019498.1 |  |
| Diras1        | 4603  | 1.18 | 0.09 | NM_145217.2 |  |
| 5730438N18Rik | 2924  | 1.18 | 0.31 | NM_027460.1 |  |
| E130306F01Rik | 373   | 1.18 | 0.09 | AK053743    |  |
| E330014F24Rik | 94    | 1.18 | 0.19 | AK054313    |  |
| Cpsf2         | 193   | 1.18 | 0.36 | NM_016856.2 |  |
| C6.1A         | 315   | 1.18 | 0.14 | NM_145956.2 |  |
| C030046K23Rik | 136   | 1.18 | 0.25 | AK047802    |  |
| 4930511A03Rik | 78    | 1.18 | 0.11 | AK029724    |  |
| D030012E24Rik | 246   | 1.18 | 0.60 | NM_176902.2 |  |
| Sart1         | 430   | 1.18 | 0.07 | NM_016882.2 |  |
| D2Wsu81e      | 207   | 1.18 | 0.19 | NM_172660.1 |  |
| 6230401I02Rik | 2345  | 1.18 | 0.20 | AK018078    |  |
| 6530404N21Rik | 153   | 1.18 | 0.30 | NM_181587.2 |  |
| 5730466C23Rik | 398   | 1.18 | 0.32 | NM_027469.1 |  |
| 2410016F19Rik | 138   | 1.18 | 0.06 | NM_026113.2 |  |
| LOC381300     | 1438  | 1.18 | 0.15 | XM_358547.1 |  |
| Rapgef3       | 64    | 1.18 | 0.50 | NM_144850.1 |  |
| Isyna1        | 1054  | 1.18 | 0.15 | NM_023627.1 |  |
| Plaur         | 51    | 1.18 | 0.41 | NM_011113.2 |  |
| 2310004I24Rik | 231   | 1.18 | 0.32 | NM_025510.1 |  |
| LOC383153     | 39    | 1.18 | 0.12 | XM_356899.1 |  |
| Cutc          | 442   | 1.18 | 0.34 | NM_025530.1 |  |
| Kif22         | 2834  | 1.18 | 0.22 | NM_145588.1 |  |
| Gpr89         | 429   | 1.18 | 0.07 | NM_026229.1 |  |
| Amigo1        | 153   | 1.18 | 0.29 |             |  |
| Agri          | 2421  | 1.18 | 0.25 | NM_021604   |  |
| 2600009P04Rik | 3288  | 1.18 | 0.66 |             |  |
| 1500031L02Rik | 5186  | 1.18 | 0.09 | NM_025892.1 |  |
| 2610319H10Rik | 427   | 1.18 | 0.29 |             |  |
| 5530600A18Rik | 764   | 1.18 | 0.47 | NM_027799.1 |  |
| Slc25a14      | 904   | 1.18 | 0.09 | NM_011398.1 |  |
| Al256775      | 131   | 1.18 | 0.23 | NM_178916   |  |
| Gpr108        | 828   | 1.18 | 0.10 | NM_030084.2 |  |
| Rasl11b       | 211   | 1.18 | 0.04 | XM_355606   |  |
| Anks3         | 661   | 1.18 | 0.14 |             |  |
| Cldn12        | 3043  | 1.18 | 0.17 | NM_022890.1 |  |
| G431001I09Rik | 136   | 1.18 | 0.37 | NM_133837.2 |  |

|                 |       |      |      |             |  |
|-----------------|-------|------|------|-------------|--|
| Rbm4            | 850   | 1.18 | 0.24 | NM_009032   |  |
| A930005L06Rik   | 38    | 1.18 | 0.50 | AK044289    |  |
| LOC384866       | 36    | 1.18 | 0.39 | XM_357906.1 |  |
| 39693           | 5960  | 1.18 | 0.10 |             |  |
| 2210408F21Rik   | 391   | 1.18 | 0.55 |             |  |
| Cant1           | 773   | 1.18 | 0.10 | NM_029502.1 |  |
| D430021H21Rik   | 37    | 1.18 | 0.47 | AK084982    |  |
| Chaf1b          | 7945  | 1.18 | 0.08 | NM_028083.1 |  |
| Tcfe3           | 302   | 1.18 | 0.29 | NM_172472.1 |  |
| Maf1            | 5812  | 1.18 | 0.17 | NM_026859.2 |  |
| 2310007F21Rik   | 1502  | 1.18 | 0.10 | XM_486226   |  |
| Hk2             | 20212 | 1.18 | 0.36 | NM_013820.1 |  |
| Wdr1            | 2975  | 1.18 | 0.20 | NM_011715.1 |  |
| 2810017I02Rik   | 502   | 1.18 | 0.05 |             |  |
| A530088L04Rik   | 40    | 1.18 | 0.37 | AK041185    |  |
| Lama5           | 558   | 1.18 | 0.06 | XM_203796.1 |  |
| 2410008B13Rik   | 872   | 1.18 | 0.16 | XM_485953   |  |
| Brca2           | 254   | 1.18 | 0.17 | AK087379    |  |
| Ptbp1           | 4934  | 1.18 | 0.10 | NM_008956   |  |
| BC027342        | 139   | 1.18 | 0.28 | NM_146251   |  |
| Cct3            | 5381  | 1.18 | 0.09 | NM_009836.1 |  |
| A630046C11Rik   | 2034  | 1.18 | 0.27 | AK041906    |  |
| 9030611K07Rik   | 36    | 1.18 | 0.80 | AK033534    |  |
| Ercc3           | 1820  | 1.18 | 0.03 | NM_133658.1 |  |
| BC018242        | 338   | 1.18 | 0.50 | NM_144935.1 |  |
| mtDNA_COXII     | 26303 | 1.18 | 0.13 |             |  |
| Bag2            | 586   | 1.18 | 0.10 | NM_145392.1 |  |
| Abcc6           | 45    | 1.18 | 0.30 | NM_018795.1 |  |
| Gba2            | 86    | 1.18 | 0.21 | NM_172692.1 |  |
| Zbtb7           | 1534  | 1.18 | 0.26 | NM_010731.1 |  |
| scl0001379.1_70 | 412   | 1.18 | 0.26 |             |  |
| 6030411F23Rik   | 260   | 1.18 | 0.39 | NM_133983.2 |  |
| LOC382878       | 576   | 1.18 | 0.27 | XM_356725.1 |  |
| Ndr3            | 942   | 1.18 | 0.30 | NM_013865.1 |  |
| C630030D09Rik   | 47    | 1.18 | 0.73 | AK083237    |  |
| Farp2           | 338   | 1.18 | 0.17 | NM_145519.1 |  |
| Lpin3           | 149   | 1.18 | 0.40 | NM_022883.1 |  |
| 2700097O09Rik   | 2591  | 1.18 | 0.19 | NM_028314.1 |  |
| D330012F22Rik   | 52    | 1.18 | 0.04 | NM_178752.2 |  |
| Cdc25c          | 206   | 1.18 | 0.06 | NM_009860.1 |  |
| 1110019L22Rik   | 1424  | 1.18 | 0.48 | NM_026756.1 |  |
| LOC382959       | 194   | 1.18 | 0.39 | XM_356771.1 |  |
| G630097J24Rik   | 62    | 1.18 | 0.36 | AK090391    |  |
| A130094L10Rik   | 39    | 1.18 | 0.33 | AK038308    |  |
| Top1mt          | 309   | 1.18 | 0.18 | XM_128145.2 |  |
| Nab2            | 45    | 1.18 | 0.51 | NM_008668.1 |  |
| Rbm13           | 4331  | 1.18 | 0.09 |             |  |
| 9330185J12Rik   | 198   | 1.18 | 0.07 |             |  |
| Ncdn            | 710   | 1.18 | 0.43 | NM_011986.2 |  |
| scl0004081.1_86 | 48    | 1.18 | 0.19 |             |  |
| LOC382436       | 44    | 1.18 | 0.11 | XM_356504.1 |  |
| A830019P03Rik   | 37    | 1.18 | 0.66 | AK043680    |  |
| LOC280408       | 79    | 1.18 | 0.62 | XM_207763.3 |  |
| 1700006D24Rik   | 191   | 1.18 | 0.37 | NM_027026.2 |  |
| 1700109H08Rik   | 435   | 1.18 | 0.20 | XM_485551   |  |
| AK129375        | 788   | 1.18 | 0.13 | NM_199469.1 |  |
| Rad51c          | 676   | 1.18 | 0.07 | NM_053269   |  |
| Alg12           | 976   | 1.18 | 0.18 | NM_145477.1 |  |
| Katnb1          | 91    | 1.18 | 0.16 | AK037858    |  |
| Cri2            | 718   | 1.18 | 0.39 | NM_198425.1 |  |
| 2310056B04Rik   | 185   | 1.18 | 0.23 |             |  |
| Hmbs            | 790   | 1.18 | 0.07 | NM_013551.1 |  |
| Tubg2           | 3791  | 1.18 | 0.24 | NM_134028.1 |  |
| 0610040O15Rik   | 70817 | 1.18 | 0.15 | AK018753    |  |
| Rpl22           | 2946  | 1.18 | 0.39 | NM_009079.2 |  |
| lap             | 69648 | 1.18 | 0.12 | NM_010490.2 |  |
| LOC218814       | 21226 | 1.18 | 0.33 | XM_127613.2 |  |
| Mgst2           | 57    | 1.18 | 0.29 | NM_174995.1 |  |

|               |       |      |      |             |  |
|---------------|-------|------|------|-------------|--|
| 4930519N13Rik | 253   | 1.18 | 0.43 | NM_207204.1 |  |
| D030070I18Rik | 42    | 1.18 | 0.50 | AK051096    |  |
| B3galt5       | 663   | 1.18 | 0.29 | NM_033149.2 |  |
| Hrh3          | 339   | 1.18 | 0.47 | NM_133849.1 |  |
| Vamp4         | 1985  | 1.18 | 0.18 | NM_016796.2 |  |
| Ddx54         | 1976  | 1.18 | 0.24 | NM_028041   |  |
| BC058638      | 2761  | 1.18 | 0.25 | NM_177630.2 |  |
| Wbp11         | 3878  | 1.18 | 0.71 | NM_021714.3 |  |
| 2210015D19Rik | 67    | 1.18 | 0.24 | AK008730    |  |
| Gm770         | 71    | 1.18 | 0.43 | XM_284451.2 |  |
| 5730578N08Rik | 3777  | 1.18 | 0.47 | XM_148395.1 |  |
| Adck1         | 374   | 1.18 | 0.25 | NM_028105.2 |  |
| Tnfsf9        | 181   | 1.18 | 0.25 | NM_009404.1 |  |
| A830087P12Rik | 90    | 1.18 | 0.29 | AK044077    |  |
| Anapc2        | 278   | 1.18 | 0.29 | NM_175300.2 |  |
| Lrrfp1        | 44    | 1.18 | 0.39 | NM_008515.1 |  |
| Foxred1       | 308   | 1.18 | 0.09 |             |  |
| 4932702K14Rik | 35    | 1.18 | 1.09 | NM_026226.1 |  |
| AI449441      | 849   | 1.18 | 0.28 | NM_172453.1 |  |
| Olf1331       | 47    | 1.18 | 0.91 |             |  |
| BC016495      | 161   | 1.17 | 0.12 | NM_145497.1 |  |
| Trim8         | 2963  | 1.17 | 0.06 | NM_053100.1 |  |
| Des           | 184   | 1.17 | 0.51 | NM_010043.1 |  |
| Rad9          | 218   | 1.17 | 0.33 | NM_011237.1 |  |
| Map4k2        | 154   | 1.17 | 0.46 | NM_009006.1 |  |
| Rab1b         | 330   | 1.17 | 0.34 |             |  |
| 2310015N07Rik | 1015  | 1.17 | 0.25 | NM_025515.1 |  |
| 2010200O16Rik | 372   | 1.17 | 0.36 | NM_026198   |  |
| Bmp7          | 213   | 1.17 | 0.19 | NM_007557.2 |  |
| D4Ert429e     | 1138  | 1.17 | 0.19 |             |  |
| Zfp64         | 423   | 1.17 | 0.16 | BC004695    |  |
| Hdac11        | 427   | 1.17 | 0.24 | NM_144919.1 |  |
| A930005I04Rik | 123   | 1.17 | 0.51 | NM_207277.1 |  |
| 2810029C07Rik | 124   | 1.17 | 0.21 |             |  |
| Pvt1          | 159   | 1.17 | 0.02 | XM_488744   |  |
| 5730455O13Rik | 4671  | 1.17 | 0.19 | XM_129261.5 |  |
| 8430423A01Rik | 615   | 1.17 | 0.08 | NM_175294.2 |  |
| Ypel3         | 2679  | 1.17 | 0.53 | NM_025347.1 |  |
| 5730494N06Rik | 1191  | 1.17 | 0.17 | NM_027478.1 |  |
| Rdh5          | 75    | 1.17 | 0.28 | AK033063    |  |
| Lsm6          | 943   | 1.17 | 0.19 | XM_134104.3 |  |
| C130099A20Rik | 769   | 1.17 | 0.15 | NM_153420   |  |
| Rhox1         | 33    | 1.17 | 0.67 |             |  |
| Slc25a5       | 24101 | 1.17 | 0.20 | NM_007451.2 |  |
| Gpatch3       | 41    | 1.17 | 0.17 |             |  |
| Ube2g2        | 139   | 1.17 | 0.25 | NM_019803.2 |  |
| 2700033B16Rik | 68    | 1.17 | 0.26 | XM_489058   |  |
| mtDNA_ND4     | 68836 | 1.17 | 0.16 |             |  |
| Cpt2          | 2350  | 1.17 | 0.01 | NM_009949   |  |
| D630002J18Rik | 83    | 1.17 | 0.13 | AK052598    |  |
| Cops5         | 6816  | 1.17 | 0.21 | AK005113    |  |
| Ap1s1         | 1090  | 1.17 | 0.26 | NM_007457   |  |
| LOC433182     | 571   | 1.17 | 0.41 |             |  |
| LOC385019     | 240   | 1.17 | 0.08 | XM_357995.1 |  |
| BC017158      | 721   | 1.17 | 0.03 | NM_145590.1 |  |
| Zfp180        | 693   | 1.17 | 0.16 | NM_172483.1 |  |
| LOC385532     | 39    | 1.17 | 0.55 | XM_358272.1 |  |
| Pcyt1a        | 580   | 1.17 | 0.18 | NM_009981.2 |  |
| Ddt           | 353   | 1.17 | 0.21 | NM_010027.1 |  |
| Supt16h       | 546   | 1.17 | 0.19 | NM_033618.1 |  |
| AI854703      | 237   | 1.17 | 0.19 | NM_177737.2 |  |
| Mettl3        | 1164  | 1.17 | 0.07 | NM_019721.1 |  |
| Mical1        | 872   | 1.17 | 0.13 |             |  |
| BC035537      | 64    | 1.17 | 0.58 | NM_153535.1 |  |
| Setd8         | 672   | 1.17 | 0.28 |             |  |
| 2310042G06Rik | 15743 | 1.17 | 0.31 | NM_025531.2 |  |
| 5430432N15Rik | 139   | 1.17 | 0.26 | NM_172418.1 |  |
| Kik1b9        | 107   | 1.17 | 0.11 |             |  |

|                 |       |      |      |             |  |
|-----------------|-------|------|------|-------------|--|
| Rwdd2           | 196   | 1.17 | 0.38 | NM_027100   |  |
| Ldb1            | 4847  | 1.17 | 0.06 | NM_010697.1 |  |
| D0H8S2298E      | 129   | 1.17 | 0.19 | NM_178648.1 |  |
| 4933426M11Rik   | 588   | 1.17 | 0.31 | NM_178682.3 |  |
| Nhlrc2          | 437   | 1.17 | 0.02 | NM_025811.1 |  |
| 4930556P03Rik   | 507   | 1.17 | 0.26 | NM_029236.1 |  |
| 5730403M16Rik   | 485   | 1.17 | 0.13 | NM_172738.1 |  |
| Cd59b           | 99    | 1.17 | 0.28 | NM_181858.1 |  |
| Kcnn1           | 144   | 1.17 | 0.15 | NM_032397.1 |  |
| 0610009E20Rik   | 3923  | 1.17 | 0.23 | NM_025318.1 |  |
| Olfr272         | 76    | 1.17 | 0.23 | NM_146839.1 |  |
| mt-Cytb         | 68011 | 1.17 | 0.18 |             |  |
| Eed             | 1402  | 1.17 | 0.32 | NM_021876.1 |  |
| scl0002602.1_34 | 52    | 1.17 | 0.25 |             |  |
| BC030499        | 168   | 1.17 | 0.28 | XM_109623   |  |
| Inha            | 257   | 1.17 | 0.32 | NM_010564.3 |  |
| 1700007E05Rik   | 35    | 1.17 | 1.06 |             |  |
| 5830416A07Rik   | 1384  | 1.17 | 0.09 | NM_024268.1 |  |
| Hpa             | 38    | 1.17 | 0.57 | AK087283    |  |
| DKFZp434J1813   | 187   | 1.17 | 0.11 | AK016269    |  |
| Tom22           | 117   | 1.17 | 0.08 | NM_172609.2 |  |
| Birc1cl         | 364   | 1.17 | 0.03 |             |  |
| 9130020G22Rik   | 190   | 1.17 | 0.15 | AK082376    |  |
| Csda            | 406   | 1.17 | 0.03 | NM_139117   |  |
| Rab5            | 673   | 1.17 | 0.26 | NM_026073.2 |  |
| A930009M04Rik   | 575   | 1.17 | 0.15 | NM_177266.3 |  |
| 2610318I01Rik   | 5611  | 1.17 | 0.17 | NM_153118.1 |  |
| 1110030H02Rik   | 237   | 1.17 | 0.06 | NM_144524.1 |  |
| lpas            | 838   | 1.17 | 0.28 | AF416641    |  |
| LOC232887       | 2672  | 1.17 | 0.17 | XM_124858.2 |  |
| Hcst            | 65    | 1.17 | 0.22 | NM_011827.1 |  |
| LOC234360       | 884   | 1.17 | 0.13 | XM_134223.2 |  |
| D15Ert781e      | 1784  | 1.17 | 0.16 | NM_145476.2 |  |
| LOC193676       | 49    | 1.17 | 0.16 | XM_110146.4 |  |
| Mapk11          | 377   | 1.17 | 0.04 | NM_011161.4 |  |
| 2610042F04Rik   | 137   | 1.17 | 0.07 | AK011740    |  |
| Foxn2           | 50    | 1.17 | 0.54 | NM_180974.1 |  |
| Slc3a2          | 323   | 1.17 | 0.12 | NM_008577   |  |
| Mta3            | 727   | 1.17 | 0.29 | NM_054082.1 |  |
| Sec14l1         | 646   | 1.17 | 0.24 | NM_028777   |  |
| 2810002G02Rik   | 142   | 1.17 | 0.53 |             |  |
| Rapgef1l        | 150   | 1.17 | 0.61 |             |  |
| Cacnb4          | 50    | 1.17 | 0.54 | NM_146123.1 |  |
| D030056L22      | 4706  | 1.17 | 0.53 | NM_177640.2 |  |
| Prkab2          | 43    | 1.17 | 0.48 | NM_182997.1 |  |
| 4930404F20Rik   | 83    | 1.17 | 0.31 | AK015077    |  |
| Cspg6           | 232   | 1.17 | 0.15 | NM_007790.2 |  |
| 4632428M11Rik   | 330   | 1.17 | 0.31 | NM_028730   |  |
| Smyd2           | 679   | 1.17 | 0.21 | NM_026796.1 |  |
| 4833436C18Rik   | 83    | 1.17 | 0.29 | NM_177377.2 |  |
| 9330155G14Rik   | 78    | 1.17 | 0.11 | AK079073    |  |
| Cdc25a          | 531   | 1.17 | 0.14 | AK036499    |  |
| 1200011I18Rik   | 43    | 1.17 | 0.39 | NM_026177.2 |  |
| A230061N24Rik   | 51    | 1.17 | 1.00 | AK038775    |  |
| 1300018I05Rik   | 3432  | 1.17 | 0.05 | NM_028791.3 |  |
| Irx5            | 272   | 1.17 | 0.25 | NM_018826.2 |  |
| 3110001O07Rik   | 817   | 1.17 | 0.16 | AK013969    |  |
| LOC384319       | 334   | 1.17 | 0.17 | XM_357568.1 |  |
| Gtf2e2          | 1511  | 1.17 | 0.15 | NM_026584.2 |  |
| Acyp2           | 122   | 1.17 | 0.04 | NM_029344.1 |  |
| Tub             | 46    | 1.17 | 0.10 | NM_021885.2 |  |
| 1300018L09Rik   | 150   | 1.17 | 0.13 | NM_027903.1 |  |
| Dok3            | 368   | 1.17 | 0.35 | NM_013739.1 |  |
| 2310004N11Rik   | 2675  | 1.17 | 0.15 | NM_028800   |  |
| 6030413G23Rik   | 147   | 1.17 | 0.10 | NM_178664.2 |  |
| Aco2            | 3167  | 1.17 | 0.21 | NM_080633.1 |  |
| D16Bwg1547e     | 2829  | 1.17 | 0.03 | NM_178069.2 |  |
| Rnf5            | 675   | 1.17 | 0.25 |             |  |

|                |       |      |      |             |  |
|----------------|-------|------|------|-------------|--|
| Nos3           | 134   | 1.17 | 0.35 | NM_008713.2 |  |
| Sfrs4          | 2501  | 1.17 | 0.37 | NM_020587.1 |  |
| 9430015G10Rik  | 225   | 1.17 | 0.08 | NM_145557.1 |  |
| Creld2         | 2839  | 1.17 | 0.19 |             |  |
| 1200015F23Rik  | 812   | 1.17 | 0.09 | XM_203936.3 |  |
| Sdfr2          | 276   | 1.17 | 0.30 | NM_009146   |  |
| 2410003P15Rik  | 977   | 1.17 | 0.18 | NM_018888.1 |  |
| Ddx21          | 2726  | 1.17 | 0.04 | AK012125    |  |
| Tprkb          | 467   | 1.17 | 0.14 |             |  |
| Krt1-18        | 1388  | 1.17 | 0.25 | NM_010664.1 |  |
| C030006K11Rik  | 342   | 1.17 | 0.27 | NM_145472.1 |  |
| Prdx3          | 910   | 1.17 | 0.26 | NM_007452.1 |  |
| 4732462B05Rik  | 4986  | 1.17 | 0.07 | AK028848    |  |
| 9430078K10Rik  | 51    | 1.17 | 0.33 |             |  |
| Ywhah          | 5988  | 1.17 | 0.37 | NM_011738   |  |
| 1190003J15Rik  | 45    | 1.17 | 0.22 | XM_133915.3 |  |
| 1810011O16Rik  | 100   | 1.17 | 0.36 | NM_025456.2 |  |
| BC087945       | 1923  | 1.17 | 0.13 |             |  |
| Misc12         | 63    | 1.17 | 0.22 | NM_025993.1 |  |
| 1110059G10Rik  | 48    | 1.17 | 0.71 | NM_025419.2 |  |
| LOC230592      | 111   | 1.17 | 0.36 | XM_143986.2 |  |
| Olf1113        | 42    | 1.17 | 0.25 | NM_207565   |  |
| Aars2          | 153   | 1.17 | 0.15 |             |  |
| Ccr7           | 50    | 1.17 | 0.50 | NM_007719.1 |  |
| scl0001187.1_2 | 41    | 1.17 | 0.50 |             |  |
| LOC385065      | 474   | 1.17 | 0.28 | XM_358029.1 |  |
| Ddx41          | 2767  | 1.17 | 0.27 | NM_134059.1 |  |
| Plxnb2         | 2363  | 1.17 | 0.07 | XM_484491   |  |
| Pdir           | 1545  | 1.17 | 0.30 | NM_028295   |  |
| Amigo3         | 276   | 1.17 | 0.20 | NM_177275.2 |  |
| Adarb1         | 218   | 1.17 | 0.17 | NM_130895   |  |
| LOC209372      | 480   | 1.17 | 0.12 | XM_125463.2 |  |
| E330009J07Rik  | 583   | 1.17 | 0.19 | NM_175528.2 |  |
| 2010003O18Rik  | 1419  | 1.17 | 0.09 | NM_029645   |  |
| E130303B06Rik  | 188   | 1.17 | 0.10 | NM_198299.1 |  |
| Polrmt         | 3316  | 1.17 | 0.10 | NM_172551.1 |  |
| Memo1          | 289   | 1.17 | 0.07 |             |  |
| Fubp3          | 1432  | 1.17 | 0.22 | XM_130112   |  |
| Mrpl3          | 1294  | 1.17 | 0.11 | AK054185    |  |
| Chtf18         | 308   | 1.17 | 0.39 | NM_145409.1 |  |
| Entpd4         | 1346  | 1.17 | 0.25 | NM_026174.1 |  |
| Acadm          | 1017  | 1.17 | 0.35 | NM_007382   |  |
| 4930564D15Rik  | 1472  | 1.17 | 0.15 |             |  |
| 1810037C20Rik  | 1201  | 1.17 | 0.28 | NM_025473.1 |  |
| Wipi2          | 1610  | 1.17 | 0.22 |             |  |
| Btd11          | 767   | 1.17 | 0.22 | XM_125798.3 |  |
| 9330120H11Rik  | 48    | 1.17 | 0.10 | NM_177029.3 |  |
| Kif15          | 193   | 1.17 | 0.09 |             |  |
| Coro1c         | 6481  | 1.17 | 0.19 | NM_011779.2 |  |
| 2500002G23Rik  | 934   | 1.17 | 0.17 | XM_289903   |  |
| Cct4           | 4595  | 1.17 | 0.22 | NM_009837.1 |  |
| Gspt2          | 2382  | 1.17 | 0.13 | NM_008179   |  |
| A130028H19Rik  | 49    | 1.17 | 0.27 | AK037589    |  |
| 2810441E16Rik  | 33    | 1.17 | 0.70 | AK028232    |  |
| Oat1           | 608   | 1.17 | 0.43 | NM_172478   |  |
| Trappc6b       | 628   | 1.17 | 0.32 | BC031464    |  |
| 6330569M22Rik  | 3811  | 1.17 | 0.29 | NM_153563.1 |  |
| D11Ert759e     | 3479  | 1.17 | 0.14 | NM_172949.1 |  |
| Akap8l         | 1488  | 1.17 | 0.22 | NM_017476.1 |  |
| LOC380644      | 39    | 1.17 | 0.72 | XM_354553.1 |  |
| Usp30          | 250   | 1.17 | 0.12 |             |  |
| LOC382092      | 22810 | 1.17 | 0.16 | XM_356174.1 |  |
| 5730405K23Rik  | 218   | 1.17 | 0.14 | XM_489612   |  |
| Cyb561d1       | 144   | 1.17 | 0.08 | XM_485295   |  |
| Axin           | 907   | 1.17 | 0.12 | XM_128515.4 |  |
| BC023151       | 80    | 1.17 | 0.36 | NM_145387   |  |
| Usp19          | 257   | 1.17 | 0.24 | NM_027804   |  |
| Ap3b2          | 448   | 1.17 | 0.20 | NM_021492   |  |



|               |       |      |      |             |  |
|---------------|-------|------|------|-------------|--|
| Hipk2         | 97    | 1.17 | 0.35 | AK016742    |  |
| Tfb1m         | 622   | 1.16 | 0.15 | NM_146074.1 |  |
| Tbrg1         | 3324  | 1.16 | 0.08 | NM_025289.1 |  |
| Zc3h12a       | 51    | 1.16 | 0.11 |             |  |
| Trim26        | 1672  | 1.16 | 0.09 | NM_030698   |  |
| 1700081H05Rik | 96    | 1.16 | 0.45 | XM_147789.1 |  |
| Scn8a         | 38    | 1.16 | 0.33 | NM_011323.1 |  |
| Rnf130        | 2314  | 1.16 | 0.30 | NM_021540.2 |  |
| C530044D11Rik | 39    | 1.16 | 0.07 | AK049717    |  |
| Klc2          | 100   | 1.16 | 0.14 | NM_008451.1 |  |
| 1300006C06Rik | 3485  | 1.16 | 0.44 | NM_028792.1 |  |
| Dnmt1         | 2755  | 1.16 | 0.11 | NM_010066.2 |  |
| 1620402D19Rik | 37    | 1.16 | 0.29 | AK028073    |  |
| 9530013D10Rik | 74    | 1.16 | 0.20 | AK035303    |  |
| Coq2          | 3284  | 1.16 | 0.03 |             |  |
| 2810032G03Rik | 247   | 1.16 | 0.08 | NM_028318.2 |  |
| Ppp2ca        | 17912 | 1.16 | 0.15 | NM_019411.2 |  |
| LOC384296     | 58    | 1.16 | 0.29 | XM_357551.1 |  |
| A930012E17Rik | 55    | 1.16 | 0.38 | AK044427    |  |
| Nol6          | 820   | 1.16 | 0.23 | NM_139236.1 |  |
| 2610528E23Rik | 132   | 1.16 | 0.31 | XM_148465.1 |  |
| Rasal1        | 80    | 1.16 | 0.08 | NM_013832.2 |  |
| 1190005N23Rik | 230   | 1.16 | 0.15 |             |  |
| Snip1         | 1536  | 1.16 | 0.11 | NM_175246.2 |  |
| 2400003N08Rik | 8507  | 1.16 | 0.12 | NM_178622.3 |  |
| Hapln4        | 1135  | 1.16 | 0.11 | NM_177900.3 |  |
| Aptx          | 106   | 1.16 | 0.19 | NM_025545   |  |
| Als2cr4       | 1623  | 1.16 | 0.25 |             |  |
| Mta1          | 427   | 1.16 | 0.39 | NM_054081.1 |  |
| Slc35d1       | 861   | 1.16 | 0.14 | NM_177732   |  |
| Nol5          | 5407  | 1.16 | 0.27 | NM_018868.1 |  |
| D130063H01Rik | 1965  | 1.16 | 0.33 | AK051669    |  |
| Endog1        | 264   | 1.16 | 0.27 | NM_172456.1 |  |
| Map17         | 131   | 1.16 | 0.33 | NM_026018.1 |  |
| A730008L03Rik | 804   | 1.16 | 0.05 | NM_021393.1 |  |
| C030027F11Rik | 63    | 1.16 | 0.38 | AK047762    |  |
| LOC235279     | 36    | 1.16 | 0.14 | XM_146810.2 |  |
| 1700003E16Rik | 328   | 1.16 | 0.36 | XM_110614.2 |  |
| Csrp1         | 604   | 1.16 | 0.41 | NM_007791.2 |  |
| Fbxw5         | 2827  | 1.16 | 0.02 | NM_013908.1 |  |
| LOC384677     | 162   | 1.16 | 0.70 | XM_357785.1 |  |
| Hexa          | 1333  | 1.16 | 0.25 | NM_010421   |  |
| Nqo3a2        | 923   | 1.16 | 0.45 | NM_028057.1 |  |
| Stx4a         | 576   | 1.16 | 0.25 | NM_009294   |  |
| Prkab1        | 1775  | 1.16 | 0.28 | NM_031869.1 |  |
| Ntrk1         | 238   | 1.16 | 0.40 | XM_283871.1 |  |
| Rab25         | 1058  | 1.16 | 0.21 | NM_016899   |  |
| Ogfr          | 3403  | 1.16 | 0.18 | NM_031373.2 |  |
| 1200015E14Rik | 370   | 1.16 | 0.20 |             |  |
| BC039282      | 192   | 1.16 | 0.21 | XM_358340   |  |
| 2700017M01Rik | 6405  | 1.16 | 0.11 | NM_028292.1 |  |
| 9530002O20Rik | 42    | 1.16 | 0.53 |             |  |
| Ercc2         | 203   | 1.16 | 0.34 | NM_007949.2 |  |
| Mtrf1         | 206   | 1.16 | 0.19 | NM_145960   |  |
| Rbbp7         | 9561  | 1.16 | 0.05 | NM_009031.2 |  |
| 1110063F24Rik | 768   | 1.16 | 0.34 | NM_133889.2 |  |
| Nup93         | 739   | 1.16 | 0.05 | NM_172410.1 |  |
| A930014K01Rik | 86    | 1.16 | 0.43 | NM_175537.2 |  |
| 1700029I15Rik | 74    | 1.16 | 0.29 | NM_183112.1 |  |
| Adfp          | 89    | 1.16 | 0.20 | NM_007408.2 |  |
| Mycs          | 245   | 1.16 | 0.05 | NM_010850   |  |
| Smad1         | 700   | 1.16 | 0.10 | NM_008539.3 |  |
| Slc25a11      | 987   | 1.16 | 0.22 | NM_024211.2 |  |
| Mpv17         | 402   | 1.16 | 0.11 | NM_008622.1 |  |
| 1700067K01Rik | 75    | 1.16 | 0.48 | NM_183097.1 |  |
| Rdh12         | 353   | 1.16 | 0.27 | XM_126957.1 |  |
| 9030418M05Rik | 96    | 1.16 | 0.21 | NM_133681.2 |  |
| LOC383301     | 103   | 1.16 | 0.39 | XM_356973.1 |  |

|                 |       |      |      |             |  |
|-----------------|-------|------|------|-------------|--|
| A730094H17Rik   | 412   | 1.16 | 0.25 | AK043421    |  |
| Xpa             | 333   | 1.16 | 0.34 | NM_011728.1 |  |
| 0710005I19Rik   | 958   | 1.16 | 0.14 | XM_194334.3 |  |
| 4930442M18Rik   | 108   | 1.16 | 0.18 |             |  |
| 1110039B18Rik   | 448   | 1.16 | 0.21 | NM_144525.2 |  |
| Epha4           | 48    | 1.16 | 0.19 | NM_007936.2 |  |
| 5730552M22Rik   | 197   | 1.16 | 0.25 | AK017836    |  |
| Rab28           | 7689  | 1.16 | 0.11 | XM_132086   |  |
| Ltap            | 254   | 1.16 | 0.07 | NM_033509.2 |  |
| 4921540A03Rik   | 67    | 1.16 | 0.35 |             |  |
| Tbl2            | 756   | 1.16 | 0.12 | NM_013763.2 |  |
| 1300001I01Rik   | 447   | 1.16 | 0.18 | XM_181333.2 |  |
| LOC241293       | 77    | 1.16 | 0.23 | XM_140862.1 |  |
| Pvr             | 270   | 1.16 | 0.18 | NM_009310   |  |
| 2210402C18Rik   | 866   | 1.16 | 0.67 | NM_027309.1 |  |
| 9630028G16Rik   | 55    | 1.16 | 0.09 | AK036031    |  |
| 4930447P04Rik   | 492   | 1.16 | 0.13 | AK019617    |  |
| Arf3            | 1965  | 1.16 | 0.12 | NM_007478.2 |  |
| Slc5a5          | 238   | 1.16 | 0.19 | NM_053248   |  |
| Slc29a4         | 3743  | 1.16 | 0.19 | NM_146257.1 |  |
| Igfbp4          | 2977  | 1.16 | 0.11 | NM_010517.2 |  |
| Bloc1s3         | 286   | 1.16 | 0.32 | NM_177692.2 |  |
| Rfc4            | 1124  | 1.16 | 0.25 | NM_145480   |  |
| BC019977        | 1623  | 1.16 | 0.23 | NM_144941.2 |  |
| Nrip3           | 1783  | 1.16 | 0.11 | NM_020610.1 |  |
| Pttg1ip         | 6243  | 1.16 | 0.11 | NM_145925.1 |  |
| Prpf18          | 1214  | 1.16 | 0.20 |             |  |
| 5730406O18Rik   | 1131  | 1.16 | 0.06 | AK017510    |  |
| Ppm1b           | 4397  | 1.16 | 0.30 | NM_011151.1 |  |
| A430034D21Rik   | 62    | 1.16 | 0.29 |             |  |
| Al875142        | 457   | 1.16 | 0.25 |             |  |
| Exdl2           | 1726  | 1.16 | 0.02 |             |  |
| C330018L13Rik   | 844   | 1.16 | 0.10 | NM_080562.2 |  |
| Tnfrsf19l       | 46    | 1.16 | 0.27 | NM_177073   |  |
| Spata2          | 135   | 1.16 | 0.21 | NM_170756.1 |  |
| D330006C15Rik   | 45    | 1.16 | 0.39 | AK052196    |  |
| Kifc5a          | 579   | 1.16 | 0.12 | NM_053173.1 |  |
| Tcfcp2          | 125   | 1.16 | 0.15 | AK051891    |  |
| scl0003092.1_40 | 1192  | 1.16 | 0.01 |             |  |
| B230209C24Rik   | 95    | 1.16 | 0.23 | AK045534    |  |
| Zfp235          | 134   | 1.16 | 0.16 | NM_019941.1 |  |
| Slc19a1         | 974   | 1.16 | 0.08 | NM_031196.1 |  |
| Ssrp1           | 2606  | 1.16 | 0.05 | NM_182990.1 |  |
| 9430062J17Rik   | 37    | 1.16 | 0.42 | NM_177746.2 |  |
| 0710007A14Rik   | 1627  | 1.16 | 0.25 | NM_023343.1 |  |
| E130001M03Rik   | 173   | 1.16 | 0.54 | AK053253    |  |
| Wdr21           | 399   | 1.16 | 0.28 | NM_030246.1 |  |
| Ddx11           | 639   | 1.16 | 0.15 | XM_128714.3 |  |
| A830089H19Rik   | 35    | 1.16 | 0.51 | AK044095    |  |
| Polb            | 330   | 1.16 | 0.11 | NM_011130.1 |  |
| Thoc3           | 394   | 1.16 | 0.48 | NM_028597.1 |  |
| 4933425K02Rik   | 161   | 1.16 | 0.21 | AK015318    |  |
| D930001I22Rik   | 1410  | 1.16 | 0.09 | NM_173397   |  |
| Cog1            | 2568  | 1.16 | 0.06 |             |  |
| Apg4b           | 100   | 1.16 | 0.48 | NM_174874.1 |  |
| Gnb5            | 533   | 1.16 | 0.08 | NM_010313.1 |  |
| Dusp23          | 91    | 1.16 | 0.23 | XM_129566   |  |
| Nars            | 2532  | 1.16 | 0.13 | NM_027350.1 |  |
| Omp             | 60    | 1.16 | 0.28 | NM_011010.1 |  |
| Golga7          | 774   | 1.16 | 0.06 | NM_020585.1 |  |
| Fv1             | 13662 | 1.16 | 0.16 | NM_010244   |  |
| Traf7           | 480   | 1.16 | 0.39 | NM_153792.1 |  |
| 4732467L16Rik   | 35    | 1.16 | 0.80 | NM_177667.2 |  |
| D930033H10Rik   | 89    | 1.16 | 0.17 |             |  |
| Polr2a          | 167   | 1.16 | 0.42 | NM_009089   |  |
| Bikl            | 182   | 1.16 | 0.47 | NM_007546.1 |  |
| Bap1            | 749   | 1.16 | 0.21 | NM_027088.1 |  |
| D930020L01      | 52    | 1.16 | 0.25 |             |  |

|                 |       |      |      |             |  |
|-----------------|-------|------|------|-------------|--|
| Elac2           | 278   | 1.16 | 0.08 | AK003759    |  |
| Olfir638        | 37    | 1.16 | 0.13 | NM_147120   |  |
| Ldb3            | 192   | 1.16 | 0.24 | NM_011918.1 |  |
| 9.33015E+22     | 51    | 1.16 | 0.55 |             |  |
| D6Erttd245e     | 2621  | 1.16 | 0.30 | NM_177762.3 |  |
| Morf4l2         | 44301 | 1.16 | 0.08 | NM_019768.2 |  |
| Fahd2a          | 98    | 1.16 | 0.07 |             |  |
| Abtb1           | 250   | 1.16 | 0.25 | NM_030251.1 |  |
| Spsb3           | 1110  | 1.16 | 0.14 |             |  |
| Nkx6-2          | 91    | 1.16 | 0.36 | NM_183248.1 |  |
| Flnb            | 395   | 1.16 | 0.36 | XM_127565.4 |  |
| 5730411O18Rik   | 144   | 1.16 | 0.56 | NM_177370.2 |  |
| LOC208166       | 113   | 1.16 | 0.18 | XM_156182.2 |  |
| Bicap           | 1444  | 1.16 | 0.25 | NM_016916.2 |  |
| Aoc2            | 179   | 1.16 | 0.32 | NM_178932.1 |  |
| Iqgap2          | 134   | 1.16 | 0.39 |             |  |
| 1100001A21Rik   | 554   | 1.15 | 0.36 | NM_025651.2 |  |
| Zfp386          | 237   | 1.15 | 0.13 | NM_019565   |  |
| Acy3            | 274   | 1.15 | 0.20 | NM_027857.2 |  |
| Aim1l           | 366   | 1.15 | 0.12 | XM_131754   |  |
| C230098O21Rik   | 829   | 1.15 | 0.13 |             |  |
| Psm14           | 2124  | 1.15 | 0.14 | NM_021526   |  |
| LOC383873       | 85    | 1.15 | 0.38 | XM_357304.1 |  |
| Dnajc3          | 310   | 1.15 | 0.17 | NM_008929.2 |  |
| Arl6            | 4982  | 1.15 | 0.21 | NM_019665   |  |
| Maged2          | 5526  | 1.15 | 0.11 | NM_030700.1 |  |
| Irak1bp1        | 51    | 1.15 | 0.32 | NM_022986.2 |  |
| 18S_rRNA_X0068  | 68410 | 1.15 | 0.16 |             |  |
| Sesn2           | 419   | 1.15 | 0.28 | NM_144907.1 |  |
| 2310003P10Rik   | 659   | 1.15 | 0.08 | NM_175145.2 |  |
| 4930487N19Rik   | 877   | 1.15 | 0.20 | AK015640    |  |
| D230029K13Rik   | 72    | 1.15 | 0.17 | AK051976    |  |
| Pcyox1          | 1169  | 1.15 | 0.14 | NM_025823.3 |  |
| Frat1           | 66    | 1.15 | 0.27 | NM_008043.2 |  |
| 1810047C23Rik   | 1364  | 1.15 | 0.13 | NM_138668.1 |  |
| Mast3           | 3453  | 1.15 | 0.15 | NM_199308.1 |  |
| Eef1a1          | 38687 | 1.15 | 0.12 | XM_203909.2 |  |
| 4930563F16Rik   | 65    | 1.15 | 0.11 | AK016205    |  |
| A330021D07Rik   | 430   | 1.15 | 0.10 | AK039311    |  |
| Mscp            | 218   | 1.15 | 0.10 | NM_030054.2 |  |
| 2810012G08Rik   | 310   | 1.15 | 0.07 |             |  |
| Dmrt2           | 86    | 1.15 | 0.25 | NM_145831.1 |  |
| Kcnc4           | 444   | 1.15 | 0.08 | NM_145922   |  |
| Nup54           | 481   | 1.15 | 0.31 | NM_183392.1 |  |
| E130309D02Rik   | 248   | 1.15 | 0.12 | NM_172726.2 |  |
| Rad23b          | 632   | 1.15 | 0.27 | NM_009011.2 |  |
| Enah            | 51    | 1.15 | 0.17 | AK020248    |  |
| Ipp             | 981   | 1.15 | 0.20 | NM_008389.1 |  |
| 1110055N21Rik   | 1468  | 1.15 | 0.24 | NM_176843   |  |
| Garnl3          | 439   | 1.15 | 0.29 | NM_178888.3 |  |
| LOC235997       | 64    | 1.15 | 0.06 | XM_142573.1 |  |
| Wdr31           | 264   | 1.15 | 0.09 | NM_023597.1 |  |
| Marveld1        | 270   | 1.15 | 0.10 | NM_183195.1 |  |
| Tssc1           | 1712  | 1.15 | 0.16 | NM_201357.1 |  |
| A630053N20Rik   | 878   | 1.15 | 0.14 | AK042036    |  |
| LOC383899       | 1108  | 1.15 | 0.05 | XM_357316.1 |  |
| Rcl1            | 1512  | 1.15 | 0.17 | NM_021525.2 |  |
| Gls2            | 1055  | 1.15 | 0.16 | XM_125928   |  |
| Ing4            | 742   | 1.15 | 0.03 | NM_144510   |  |
| Ube2e2          | 1767  | 1.15 | 0.16 | NM_144839.1 |  |
| 2400007G07Rik   | 6276  | 1.15 | 0.09 | AK010296    |  |
| 6330407D12Rik   | 1966  | 1.15 | 0.05 | NM_175098.2 |  |
| 6330419J24Rik   | 48    | 1.15 | 0.42 | NM_183030   |  |
| Vcp             | 12520 | 1.15 | 0.09 | NM_009503.2 |  |
| Gbl             | 1168  | 1.15 | 0.04 | NM_019988.2 |  |
| Zfp526          | 57    | 1.15 | 0.40 | NM_175436.2 |  |
| scl000510.1_2   | 94    | 1.15 | 0.26 |             |  |
| scl0001419.1_32 | 2675  | 1.15 | 0.05 |             |  |

|                  |       |      |      |             |  |
|------------------|-------|------|------|-------------|--|
| Cmklr1           | 94    | 1.15 | 0.40 | NM_008153   |  |
| Ascc1            | 652   | 1.15 | 0.38 | XM_483908   |  |
| LOC235857        | 465   | 1.15 | 0.24 | XM_135371.3 |  |
| Nol3             | 521   | 1.15 | 0.11 | NM_030152.2 |  |
| Kazald1          | 57    | 1.15 | 0.15 | NM_178929   |  |
| Katna1           | 1213  | 1.15 | 0.18 | NM_011835.1 |  |
| 4632434I11Rik    | 113   | 1.15 | 0.29 | NM_028729.1 |  |
| A130021C14Rik    | 47    | 1.15 | 0.93 | AK037486    |  |
| C330046L10Rik    | 42    | 1.15 | 0.56 | NM_198421.1 |  |
| Tjp1             | 240   | 1.15 | 0.29 | NM_009386.1 |  |
| Repin1           | 2315  | 1.15 | 0.17 | NM_175099.2 |  |
| Map1lc3b         | 605   | 1.15 | 0.34 | NM_026160   |  |
| H3f3a            | 5386  | 1.15 | 0.23 | NM_008210.2 |  |
| Map3k6           | 78    | 1.15 | 0.17 | NM_016693   |  |
| Zfp365           | 356   | 1.15 | 0.24 | NM_178679.1 |  |
| Rrn3             | 555   | 1.15 | 0.06 | XM_358764.1 |  |
| Il17r            | 170   | 1.15 | 0.19 | NM_008359   |  |
| Knsl5            | 529   | 1.15 | 0.21 | AK076271    |  |
| LOC210582        | 1120  | 1.15 | 0.33 | XM_109592.2 |  |
| Smarcd2          | 5188  | 1.15 | 0.26 | NM_031878.1 |  |
| LOC383293        | 134   | 1.15 | 0.09 | XM_356969.1 |  |
| D0HXS9928E       | 1488  | 1.15 | 0.19 | NM_138607.1 |  |
| Gab3             | 56    | 1.15 | 0.15 | NM_181584.2 |  |
| 1810054D07Rik    | 280   | 1.15 | 0.10 | AK007856    |  |
| Cdk10            | 173   | 1.15 | 0.28 | NM_194444.1 |  |
| 9630028B13Rik    | 119   | 1.15 | 0.15 | NM_176943.2 |  |
| Gnb2-rs1         | 333   | 1.15 | 0.11 | NM_008143.2 |  |
| A930009E05Rik    | 187   | 1.15 | 0.28 | XM_489135   |  |
| Pwp2             | 436   | 1.15 | 0.16 |             |  |
| 1110001A12Rik    | 1433  | 1.15 | 0.11 | NM_029571.1 |  |
| 5430400L16Rik    | 47    | 1.15 | 0.52 | AK077369    |  |
| Gclm             | 2334  | 1.15 | 0.48 | NM_008129.2 |  |
| 2310042N02Rik    | 135   | 1.15 | 0.16 | NM_024246.3 |  |
| LOC208748        | 572   | 1.15 | 0.50 | XM_141833.2 |  |
| E330019I03Rik    | 83    | 1.15 | 0.18 | AK054364    |  |
| Cla3             | 79    | 1.15 | 0.32 | AK088401    |  |
| Il11ra2          | 269   | 1.15 | 0.09 | NM_010550   |  |
| C920006O11Rik    | 78    | 1.15 | 0.29 | XM_489286   |  |
| Ndufs2           | 1533  | 1.15 | 0.18 | NM_153064.3 |  |
| LOC242025        | 90    | 1.15 | 0.20 | XM_143236.3 |  |
| Tcea3            | 39    | 1.15 | 0.61 | NM_011542   |  |
| 2900003A17Rik    | 52    | 1.15 | 0.21 |             |  |
| LOC327951        | 66    | 1.15 | 0.26 | XM_282990.2 |  |
| C030025P15Rik    | 625   | 1.15 | 0.32 | NM_177287   |  |
| 1110029L17Rik    | 1946  | 1.15 | 0.23 |             |  |
| Taf9b            | 1831  | 1.15 | 0.37 |             |  |
| scl000048.1_50_F | 2368  | 1.15 | 0.13 |             |  |
| E330017O14Rik    | 45    | 1.15 | 1.00 | AK054351    |  |
| Selk             | 1105  | 1.15 | 0.18 | NM_019979.1 |  |
| 0610005A07Rik    | 84    | 1.15 | 0.39 | XM_359308.1 |  |
| Mdga1            | 48    | 1.15 | 0.26 | XM_193868.3 |  |
| Zfp467           | 161   | 1.15 | 0.13 | NM_020589   |  |
| Camk1            | 239   | 1.15 | 0.15 | NM_133926.1 |  |
| C330018C16Rik    | 108   | 1.15 | 0.20 | AK049267    |  |
| Src              | 170   | 1.15 | 0.29 | NM_009271.1 |  |
| Atp8b3           | 64    | 1.15 | 0.15 | NM_026094.3 |  |
| B230323K17Rik    | 121   | 1.15 | 0.28 | AK045923    |  |
| Muted            | 574   | 1.15 | 0.09 | NM_178054   |  |
| Grp58            | 14524 | 1.15 | 0.09 | NM_007952.1 |  |
| Sars2            | 133   | 1.15 | 0.28 |             |  |
| Tacc1            | 384   | 1.15 | 0.24 |             |  |
| A730011F23Rik    | 348   | 1.15 | 0.31 | XM_132426.2 |  |
| 9330161F08Rik    | 1181  | 1.15 | 0.21 | NM_145469.1 |  |
| D930010J01Rik    | 60    | 1.15 | 0.40 | NM_134147.2 |  |
| 2700078K21Rik    | 164   | 1.15 | 0.48 | AK012535    |  |
| BC004012         | 4341  | 1.15 | 0.40 | NM_138671   |  |
| Cldn23           | 545   | 1.15 | 0.29 | NM_027998.2 |  |
| Klhdc3           | 445   | 1.15 | 0.47 | NM_027910.1 |  |

|                 |       |      |      |             |  |
|-----------------|-------|------|------|-------------|--|
| Gm587           | 151   | 1.15 | 0.04 |             |  |
| LOC384281       | 707   | 1.15 | 0.25 | XM_357540.1 |  |
| Ptp4a2          | 5827  | 1.15 | 0.07 | NM_008974.2 |  |
| Scyl1           | 148   | 1.15 | 0.51 | NM_023912.1 |  |
| 4930539E08Rik   | 256   | 1.15 | 0.07 | NM_172450.1 |  |
| Cops7b          | 470   | 1.15 | 0.04 | NM_172974.1 |  |
| Mtss1           | 138   | 1.15 | 0.38 | NM_144800.1 |  |
| 1700025G04Rik   | 419   | 1.15 | 0.15 | NM_197990.1 |  |
| LOC239083       | 501   | 1.15 | 0.30 | XM_139038.2 |  |
| Siat8c          | 360   | 1.15 | 0.05 | AK015874    |  |
| Me2             | 688   | 1.15 | 0.17 | NM_145494.1 |  |
| 2310033E01Rik   | 46    | 1.15 | 0.08 |             |  |
| Cenpl           | 1899  | 1.15 | 0.28 |             |  |
| G630055P03Rik   | 723   | 1.15 | 0.31 | NM_177150.1 |  |
| Osbpl3          | 199   | 1.15 | 0.19 | NM_027881.1 |  |
| LOC225010       | 39    | 1.15 | 0.38 | XM_128781.4 |  |
| Dbt             | 180   | 1.15 | 0.14 | NM_010022.1 |  |
| Lymr1           | 150   | 1.15 | 0.18 |             |  |
| Syngn3          | 932   | 1.15 | 0.32 | NM_011522.2 |  |
| Gart            | 4283  | 1.15 | 0.14 | NM_010256.1 |  |
| Nit1            | 769   | 1.15 | 0.07 | NM_012049.1 |  |
| Slc4a1ap        | 798   | 1.15 | 0.04 | NM_009206.1 |  |
| 6330403M23Rik   | 2613  | 1.15 | 0.24 |             |  |
| Rttm            | 69    | 1.15 | 0.12 | NM_175542   |  |
| Cib3            | 166   | 1.15 | 0.17 | XM_356089.1 |  |
| Anxa11          | 305   | 1.15 | 0.71 | AK044203    |  |
| 1110063G11Rik   | 541   | 1.14 | 0.10 | NM_178874.2 |  |
| ICRFP703B1614C  | 188   | 1.14 | 0.51 | NM_020616.1 |  |
| C130022K22Rik   | 1827  | 1.14 | 0.12 | NM_172730.1 |  |
| D630003K02Rik   | 45    | 1.14 | 0.08 | NM_177216   |  |
| Actr1a          | 4826  | 1.14 | 0.17 | NM_016860.1 |  |
| Keo4            | 1014  | 1.14 | 0.13 | NM_145502.2 |  |
| 2810403P18Rik   | 514   | 1.14 | 0.13 | NM_181590.2 |  |
| Nme7            | 3435  | 1.14 | 0.03 | NM_138314.1 |  |
| A730008H23      | 511   | 1.14 | 0.10 | NM_172505.1 |  |
| Eif4a1          | 13960 | 1.14 | 0.10 | NM_144958.2 |  |
| Pygl            | 45    | 1.14 | 0.49 | NM_133198.1 |  |
| A730046J19Rik   | 37    | 1.14 | 0.39 |             |  |
| Bach1           | 922   | 1.14 | 0.26 | NM_007520.1 |  |
| Chic2           | 3435  | 1.14 | 0.25 | AK015681    |  |
| BC051244        | 230   | 1.14 | 0.11 | NM_178413   |  |
| AA881470        | 664   | 1.14 | 0.10 | NM_172724   |  |
| B230353J12Rik   | 41    | 1.14 | 0.54 | AK046216    |  |
| Zscan21         | 214   | 1.14 | 0.42 |             |  |
| Eil             | 2013  | 1.14 | 0.17 | NM_007924.1 |  |
| Al481100        | 203   | 1.14 | 0.20 | NM_019440.2 |  |
| 4432404P07Rik   | 136   | 1.14 | 0.10 |             |  |
| A330017A19Rik   | 69    | 1.14 | 0.65 | AK039293    |  |
| Nrbf2           | 965   | 1.14 | 0.10 | NM_025307   |  |
| LOC192950       | 311   | 1.14 | 0.38 | XM_109794.2 |  |
| LOC330731       | 37    | 1.14 | 0.46 | XM_282816.2 |  |
| Vdac2           | 2852  | 1.14 | 0.28 | NM_011695.1 |  |
| scl0003155.1_68 | 158   | 1.14 | 0.36 |             |  |
| 2610039C10Rik   | 2180  | 1.14 | 0.25 |             |  |
| Lamp1           | 10851 | 1.14 | 0.14 | NM_010684   |  |
| B230339C08Rik   | 33    | 1.14 | 0.91 | AK046059    |  |
| LOC380637       | 120   | 1.14 | 0.52 | XM_358391.1 |  |
| Mrg1            | 315   | 1.14 | 0.11 | AK045126    |  |
| Slc25a34        | 61    | 1.14 | 0.12 |             |  |
| Nudt10          | 1291  | 1.14 | 0.04 |             |  |
| Trib3           | 2903  | 1.14 | 0.03 | NM_175093.1 |  |
| Gspt1           | 36708 | 1.14 | 0.20 | NM_146066.1 |  |
| Asf1b           | 347   | 1.14 | 0.25 | NM_024184.1 |  |
| Klf4            | 249   | 1.14 | 0.43 | NM_010637   |  |
| Csrp2bp         | 1332  | 1.14 | 0.12 | NM_181417.2 |  |
| 2700050P07Rik   | 377   | 1.14 | 0.26 | NM_133927.1 |  |
| 4933437N03Rik   | 82    | 1.14 | 0.28 | NM_025765   |  |
| Letmd1          | 732   | 1.14 | 0.20 | NM_134093.1 |  |

|                 |       |      |      |             |  |
|-----------------|-------|------|------|-------------|--|
| scl0004158.1_6  | 122   | 1.14 | 0.41 |             |  |
| Arl2bp          | 630   | 1.14 | 0.24 | NM_024269.2 |  |
| BC023835        | 685   | 1.14 | 0.41 | NM_172116   |  |
| Atf5            | 4986  | 1.14 | 0.05 | NM_030693.1 |  |
| D5Ertd708e      | 807   | 1.14 | 0.13 | NM_024216.1 |  |
| BC038881        | 253   | 1.14 | 0.04 | XM_355977   |  |
| Sbf1            | 1134  | 1.14 | 0.37 | XM_358316.1 |  |
| Rabep2          | 340   | 1.14 | 0.25 | NM_030566.1 |  |
| LOC232606       | 960   | 1.14 | 0.25 | XM_124826.2 |  |
| LOC243823       | 96    | 1.14 | 0.14 | XM_145307.2 |  |
| Dapk3           | 485   | 1.14 | 0.10 | NM_007828.1 |  |
| Ercc5           | 2150  | 1.14 | 0.03 | NM_011729.1 |  |
| LOC242726       | 66    | 1.14 | 0.19 | XM_144067.1 |  |
| Bai2            | 52    | 1.14 | 0.25 | NM_173071.1 |  |
| Tspan7          | 3044  | 1.14 | 0.42 |             |  |
| 4930438O03Rik   | 40    | 1.14 | 0.50 | XM_132350.2 |  |
| Scg2            | 2405  | 1.14 | 0.21 | NM_009129.1 |  |
| 6330580J24Rik   | 256   | 1.14 | 0.15 | NM_026378.2 |  |
| Dab2ip          | 897   | 1.14 | 0.33 | XM_130206.4 |  |
| Dhh             | 61    | 1.14 | 0.18 | NM_007857   |  |
| Gpsm1           | 823   | 1.14 | 0.09 | NM_153410.2 |  |
| Taf9            | 796   | 1.14 | 0.09 | NM_027139.3 |  |
| 3200001K10Rik   | 231   | 1.14 | 0.05 | XM_131950.2 |  |
| C820007E08Rik   | 48    | 1.14 | 0.31 | AK050521    |  |
| Gnb1            | 9028  | 1.14 | 0.28 | NM_008142.2 |  |
| Rhbdf1          | 408   | 1.14 | 0.01 | NM_010117.1 |  |
| LOC381674       | 1653  | 1.14 | 0.23 | XM_355646.1 |  |
| Ddx24           | 1693  | 1.14 | 0.25 | AK084251    |  |
| Glb1            | 721   | 1.14 | 0.09 | NM_009752.1 |  |
| C330016O10Rik   | 96    | 1.14 | 0.16 | NM_145974.2 |  |
| AI597479        | 1896  | 1.14 | 0.19 | NM_133818.1 |  |
| A430107P09Rik   | 91    | 1.14 | 0.21 | NM_177288.2 |  |
| E530004K11Rik   | 43    | 1.14 | 0.03 | AK089126    |  |
| Slc25a3         | 5728  | 1.14 | 0.11 | NM_133668.2 |  |
| Ubb             | 71854 | 1.14 | 0.15 | NM_011664.1 |  |
| 2810455F06Rik   | 940   | 1.14 | 0.09 | XM_130011.5 |  |
| 1110001E17Rik   | 198   | 1.14 | 0.35 | NM_144534.1 |  |
| Ltbr            | 351   | 1.14 | 0.47 | NM_010736.1 |  |
| scl0003251.1_21 | 108   | 1.14 | 0.07 |             |  |
| 1110059P08Rik   | 88    | 1.14 | 0.85 | NM_025418.2 |  |
| 2810407C02Rik   | 468   | 1.14 | 0.14 | XM_283848.2 |  |
| 1810073G14Rik   | 2697  | 1.14 | 0.19 | NM_026342.1 |  |
| 2310001H12Rik   | 438   | 1.14 | 0.03 | NM_145563.1 |  |
| Rrm2            | 564   | 1.14 | 0.06 | NM_009104   |  |
| Aspscr1         | 497   | 1.14 | 0.20 | NM_026877.1 |  |
| Cox11           | 262   | 1.14 | 0.32 | NM_199008.1 |  |
| Nfkbib          | 292   | 1.14 | 0.17 | NM_010908.3 |  |
| Fkbp14          | 122   | 1.14 | 0.39 | NM_153573.1 |  |
| Ubap2           | 2466  | 1.14 | 0.19 | NM_026872.1 |  |
| Obgrp           | 1416  | 1.14 | 0.27 | NM_175036   |  |
| Mad2l1          | 2376  | 1.14 | 0.21 | NM_019499   |  |
| Dnajc8          | 608   | 1.14 | 0.17 | NM_172400   |  |
| Cdk9            | 676   | 1.14 | 0.23 | NM_130860.1 |  |
| A930018M24Rik   | 38    | 1.14 | 0.28 | NM_199318   |  |
| G630038I01Rik   | 75    | 1.14 | 0.04 | AK090290    |  |
| Foxo6           | 87    | 1.14 | 0.13 | NM_194060.1 |  |
| A630034E16Rik   | 51    | 1.14 | 0.29 | AK041749    |  |
| Syt11           | 5085  | 1.14 | 0.07 | NM_018804.2 |  |
| Sec3l1l         | 615   | 1.14 | 0.17 | XM_132230.3 |  |
| Hsd17b7         | 660   | 1.14 | 0.19 | NM_010476.2 |  |
| Pacs1           | 632   | 1.14 | 0.34 | XM_283545.1 |  |
| Dlg7            | 381   | 1.14 | 0.33 | NM_144553.1 |  |
| Scrib           | 221   | 1.14 | 0.29 | NM_134089.1 |  |
| Ubadc1          | 931   | 1.14 | 0.13 | NM_133835.1 |  |
| Olf1105         | 41    | 1.14 | 0.35 |             |  |
| Fancl           | 315   | 1.14 | 0.12 | NM_025923.2 |  |
| 1700028J19Rik   | 75    | 1.14 | 0.44 | XM_204266.2 |  |
| A630086H07Rik   | 79    | 1.14 | 0.07 | AK080384    |  |

|               |       |      |      |             |  |
|---------------|-------|------|------|-------------|--|
| Dazap1        | 3143  | 1.14 | 0.13 | AK010657    |  |
| Kars          | 497   | 1.14 | 0.08 | BC035324    |  |
| A930019L04Rik | 190   | 1.14 | 0.20 |             |  |
| 4931440N07Rik | 228   | 1.14 | 0.08 | NM_201368.1 |  |
| LOC232879     | 619   | 1.14 | 0.52 | XM_133186.5 |  |
| LOC214249     | 50    | 1.14 | 0.48 | XM_135486.3 |  |
| 4930432K21Rik | 79    | 1.14 | 0.18 | XM_134324.4 |  |
| Rapgef1       | 281   | 1.14 | 0.16 | NM_054050.1 |  |
| 4921533J23Rik | 95    | 1.14 | 0.07 | AK014997    |  |
| Ars2          | 1718  | 1.14 | 0.22 | NM_031405.1 |  |
| Cryzl1        | 2269  | 1.14 | 0.13 | NM_133679.1 |  |
| Zcchc9        | 220   | 1.14 | 0.19 | NM_145453.1 |  |
| Atpaf2        | 673   | 1.14 | 0.15 | NM_145427.1 |  |
| LOC270665     | 58    | 1.14 | 0.67 | XM_195245.2 |  |
| Olfr1412      | 48    | 1.14 | 0.40 | NM_146277   |  |
| 1110014C03Rik | 4605  | 1.14 | 0.07 | NM_026775.2 |  |
| Mtap          | 906   | 1.14 | 0.08 | NM_024433.1 |  |
| Lass5         | 1084  | 1.14 | 0.26 | BC043059    |  |
| Nol5a         | 3472  | 1.14 | 0.07 | NM_024193.1 |  |
| Gm1040        | 48    | 1.14 | 0.64 |             |  |
| Gnl2          | 2275  | 1.14 | 0.07 | NM_145552   |  |
| Hemk1         | 513   | 1.14 | 0.25 | NM_133984.1 |  |
| Mcm10         | 804   | 1.14 | 0.12 | NM_027290.1 |  |
| Mki67ip       | 5216  | 1.14 | 0.10 | NM_026472.2 |  |
| Crmp1         | 817   | 1.14 | 0.10 | NM_007765.3 |  |
| Mela          | 36698 | 1.14 | 0.12 | NM_008581.1 |  |
| C030004B10Rik | 54    | 1.14 | 0.47 | AK081207    |  |
| Nte           | 406   | 1.14 | 0.11 | NM_015801   |  |
| Nfatc3        | 407   | 1.14 | 0.22 | AK039929    |  |
| LOC218696     | 279   | 1.14 | 0.05 | XM_122655.5 |  |
| 2310008H04Rik | 1601  | 1.14 | 0.13 | NM_146068   |  |
| Drbp1         | 1503  | 1.14 | 0.04 | NM_178090.2 |  |
| Prdm15        | 465   | 1.14 | 0.37 |             |  |
| Dtx2          | 732   | 1.14 | 0.13 | NM_023742.1 |  |
| Fnbp1         | 244   | 1.14 | 0.37 | NM_019406.1 |  |
| Abcb6         | 1343  | 1.14 | 0.11 | NM_023732.2 |  |
| Agxt2l2       | 313   | 1.14 | 0.05 |             |  |
| C130023A14Rik | 54    | 1.14 | 0.13 |             |  |
| Phox2b        | 55    | 1.14 | 0.32 | NM_008888.1 |  |
| 1200007D18Rik | 1746  | 1.14 | 0.08 | NM_026170.2 |  |
| Rtn1          | 855   | 1.14 | 0.35 | NM_153457.4 |  |
| Nfkbie        | 58    | 1.14 | 0.58 | NM_008690.2 |  |
| 2900008M13Rik | 1430  | 1.14 | 0.16 | XM_110121.4 |  |
| LOC245297     | 143   | 1.14 | 0.14 | XM_143006.1 |  |
| LOC329750     | 8464  | 1.14 | 0.15 | XM_287286.2 |  |
| E430018J23Rik | 355   | 1.14 | 0.10 | NM_198011.1 |  |
| Lmtk2         | 642   | 1.14 | 0.18 | XM_132499   |  |
| LOC225456     | 10557 | 1.14 | 0.19 | XM_123230.2 |  |
| Tmem111       | 2926  | 1.14 | 0.13 |             |  |
| Farsb         | 12511 | 1.14 | 0.10 |             |  |
| Serbp1        | 5139  | 1.14 | 0.19 |             |  |
| Dscr1         | 942   | 1.14 | 0.16 | AF260717    |  |
| Trp53rk       | 155   | 1.14 | 0.19 | NM_023815   |  |
| Ddef2         | 174   | 1.14 | 0.43 |             |  |
| Lmb2          | 609   | 1.14 | 0.05 | NM_010722.2 |  |
| Dapp1         | 63    | 1.14 | 0.21 | NM_011932.1 |  |
| Olfr694       | 40    | 1.14 | 0.44 | NM_146452.1 |  |
| Btbd12        | 2161  | 1.14 | 0.26 | NM_177472.3 |  |
| 9530018I07Rik | 4722  | 1.14 | 0.32 |             |  |
| C530038F07Rik | 65    | 1.14 | 0.23 | AK083047    |  |
| Sco1          | 76    | 1.13 | 0.43 |             |  |
| scl000171.1_4 | 67    | 1.13 | 0.04 |             |  |
| E330037N20Rik | 43    | 1.13 | 0.35 | AK087894    |  |
| Giyd2         | 38    | 1.13 | 0.22 |             |  |
| Asphd2        | 1201  | 1.13 | 0.04 |             |  |
| A830020B06Rik | 1386  | 1.13 | 0.17 | NM_175564.2 |  |
| Clk3          | 536   | 1.13 | 0.26 | AK002964    |  |
| Kcna1         | 30    | 1.13 | 0.50 | NM_010595.2 |  |

|               |       |      |      |             |  |
|---------------|-------|------|------|-------------|--|
| Cstf3         | 1961  | 1.13 | 0.07 | NM_145529.1 |  |
| Klf13         | 1331  | 1.13 | 0.43 | NM_021366   |  |
| D130083G05Rik | 959   | 1.13 | 0.15 | AK084071    |  |
| Bckdhb        | 424   | 1.13 | 0.32 | NM_199195.1 |  |
| Tlx3          | 221   | 1.13 | 0.44 | NM_019916.1 |  |
| 9130213B05Rik | 59    | 1.13 | 0.51 | NM_145562.1 |  |
| LOC384100     | 58    | 1.13 | 0.03 | NM_206871   |  |
| Traf3         | 1314  | 1.13 | 0.15 | NM_011632.1 |  |
| Kcnk6         | 54    | 1.13 | 0.25 | XM_355877   |  |
| Poli          | 720   | 1.13 | 0.11 | NM_011972.1 |  |
| 2900046G09Rik | 1682  | 1.13 | 0.22 | NM_133778.1 |  |
| Pdha1         | 2205  | 1.13 | 0.04 | NM_008810.2 |  |
| Rnf6          | 3047  | 1.13 | 0.10 | NM_028774.1 |  |
| 9430057O19Rik | 39    | 1.13 | 0.33 | NM_174849.2 |  |
| 2210410P13Rik | 756   | 1.13 | 0.14 |             |  |
| Rab39b        | 269   | 1.13 | 0.10 | NM_175122.2 |  |
| 1700085B03Rik | 94    | 1.13 | 0.09 |             |  |
| Gtpbp4        | 6338  | 1.13 | 0.12 | NM_027000.2 |  |
| 2410112O06Rik | 420   | 1.13 | 0.12 | AK010766    |  |
| Slc20a2       | 336   | 1.13 | 0.16 | AK076380    |  |
| Polr3a        | 158   | 1.13 | 0.09 | XM_487324   |  |
| Pxmp3         | 1427  | 1.13 | 0.16 | NM_008994.2 |  |
| Wdr34         | 1370  | 1.13 | 0.38 | XM_130136.1 |  |
| Pigb          | 94    | 1.13 | 0.22 | NM_018889.1 |  |
| Mre11a        | 338   | 1.13 | 0.15 | NM_018736.2 |  |
| 2700025J07Rik | 448   | 1.13 | 0.32 | AK012290    |  |
| Reep1         | 1825  | 1.13 | 0.20 |             |  |
| 5730481H23Rik | 60    | 1.13 | 0.39 | AK036995    |  |
| D11Bwg0414e   | 7367  | 1.13 | 0.17 |             |  |
| Pddc1         | 454   | 1.13 | 0.29 |             |  |
| Vars          | 2840  | 1.13 | 0.07 |             |  |
| 2410018E23Rik | 56    | 1.13 | 0.63 | XM_150076.1 |  |
| Mast2         | 2282  | 1.13 | 0.36 | NM_008641.1 |  |
| Nlk           | 497   | 1.13 | 0.19 | NM_008702.2 |  |
| Ccdc11        | 49    | 1.13 | 0.29 |             |  |
| Cetn4         | 151   | 1.13 | 0.55 |             |  |
| 6430511F03    | 541   | 1.13 | 0.12 |             |  |
| Tuft1         | 1686  | 1.13 | 0.15 | NM_011656.1 |  |
| Riok1         | 284   | 1.13 | 0.06 | NM_024242.2 |  |
| Trappc3       | 466   | 1.13 | 0.28 | NM_013718.2 |  |
| Tubb5         | 28527 | 1.13 | 0.09 | NM_011655.2 |  |
| Fzr1          | 3639  | 1.13 | 0.12 | NM_019757.1 |  |
| Kctd2         | 1706  | 1.13 | 0.20 | NM_183285.1 |  |
| E130309D14Rik | 62    | 1.13 | 0.78 |             |  |
| 4921517L17Rik | 44    | 1.13 | 0.58 | XM_130609.2 |  |
| Mafg          | 1703  | 1.13 | 0.13 | NM_010756.3 |  |
| Yeats4        | 1684  | 1.13 | 0.24 | NM_026570.1 |  |
| Slc35c1       | 6889  | 1.13 | 0.14 | NM_145832.2 |  |
| 2510003B16Rik | 52    | 1.13 | 0.32 |             |  |
| Mapk8ip1      | 3290  | 1.13 | 0.06 |             |  |
| D7Ert156e     | 4141  | 1.13 | 0.14 | NM_153057.2 |  |
| Gars          | 45391 | 1.13 | 0.02 | NM_180678.2 |  |
| Arfgap3       | 366   | 1.13 | 0.30 | NM_025445.2 |  |
| LOC229810     | 2961  | 1.13 | 0.10 | XM_124173.2 |  |
| Gjb5          | 35    | 1.13 | 0.13 | NM_010291.2 |  |
| Mtch1         | 14107 | 1.13 | 0.21 | NM_019880.2 |  |
| D4Bwg1540e    | 176   | 1.13 | 0.32 | NM_026257.1 |  |
| A630022G20Rik | 449   | 1.13 | 0.13 | AK041581    |  |
| Dap           | 212   | 1.13 | 0.13 | NM_146057.1 |  |
| Hdac10        | 165   | 1.13 | 0.39 | NM_199198.1 |  |
| 2010008E23Rik | 130   | 1.13 | 0.09 | XM_126502.4 |  |
| Al429152      | 128   | 1.13 | 0.17 | NM_153126.1 |  |
| 6430604K15Rik | 554   | 1.13 | 0.08 | NM_175560.2 |  |
| 5330412A19Rik | 43    | 1.13 | 0.76 | AK077316    |  |
| Slc22a7       | 165   | 1.13 | 0.28 | NM_144856.1 |  |
| Ptprs         | 1349  | 1.13 | 0.36 | AK032604    |  |
| LOC243245     | 359   | 1.13 | 0.17 | XM_144541.3 |  |
| scl000408.1_6 | 1167  | 1.13 | 0.11 |             |  |



|               |       |      |      |             |  |
|---------------|-------|------|------|-------------|--|
| Tnfrsf4       | 217   | 1.13 | 0.35 | NM_011659   |  |
| D030063E12    | 702   | 1.13 | 0.28 |             |  |
| Maged1        | 31014 | 1.13 | 0.23 | NM_019791.1 |  |
| Bpy2ip1       | 792   | 1.13 | 0.33 | NM_173013.1 |  |
| LOC237408     | 84    | 1.13 | 0.63 | XM_137196.3 |  |
| Hpn           | 690   | 1.13 | 0.08 | NM_008281.1 |  |
| Fbxo7         | 270   | 1.13 | 0.38 | NM_153195.1 |  |
| Noc2l         | 5911  | 1.13 | 0.08 |             |  |
| Gas6          | 52    | 1.13 | 0.42 | NM_019521.1 |  |
| Zswim5        | 143   | 1.13 | 0.49 | XM_204114.3 |  |
| Cct6a         | 14930 | 1.13 | 0.10 | NM_009838   |  |
| 4933417K04Rik | 339   | 1.13 | 0.29 | NM_153518.1 |  |
| Zfp91         | 536   | 1.13 | 0.10 | XM_484778   |  |
| Pfkl          | 4368  | 1.13 | 0.16 | NM_008826.2 |  |
| D030068E18Rik | 30    | 1.13 | 0.62 | AK083698    |  |
| Upb1          | 145   | 1.13 | 0.15 | NM_133995.1 |  |
| Flot1         | 993   | 1.13 | 0.08 | NM_008027.1 |  |
| 2210410D02Rik | 45    | 1.13 | 0.20 | AK008881    |  |
| 1700087I21Rik | 79    | 1.13 | 0.25 |             |  |
| Prkd2         | 2262  | 1.13 | 0.23 |             |  |
| Snape4        | 547   | 1.13 | 0.16 | NM_172339.1 |  |
| 2610018I03Rik | 404   | 1.13 | 0.08 | XM_135023.2 |  |
| B3galt4       | 173   | 1.13 | 0.23 | NM_019420.1 |  |
| Galgt1        | 292   | 1.13 | 0.10 | AK086849    |  |
| Dtx3          | 2644  | 1.13 | 0.60 | NM_030714.1 |  |
| Wdr22         | 1788  | 1.13 | 0.05 | NM_177267   |  |
| 4930506C02Rik | 76    | 1.13 | 0.14 | NM_175216.2 |  |
| A530089A20Rik | 1367  | 1.13 | 0.07 | AK041191    |  |
| 9530082M04Rik | 39    | 1.13 | 0.17 | AK035659    |  |
| mtDNA_COXIII  | 70868 | 1.13 | 0.13 |             |  |
| 9130012A08Rik | 58    | 1.13 | 0.44 | AK033581    |  |
| 2300006M17Rik | 78    | 1.13 | 0.65 | XM_127388.3 |  |
| D3Erd751e     | 69    | 1.13 | 0.45 |             |  |
| D16Bwg1494e   | 99    | 1.13 | 0.13 | XM_358773.1 |  |
| St6galnac2    | 158   | 1.13 | 0.21 |             |  |
| 6330575B07Rik | 136   | 1.13 | 0.24 | XM_134032.2 |  |
| Cdc42ep4      | 684   | 1.13 | 0.25 | NM_020006.1 |  |
| LOC386486     | 430   | 1.13 | 0.28 | XM_359329.1 |  |
| Tpd52l2       | 1290  | 1.13 | 0.24 | NM_025482.2 |  |
| D11Bwg0280e   | 296   | 1.13 | 0.23 | XM_125972.5 |  |
| Dync2li1      | 1231  | 1.13 | 0.33 |             |  |
| Zfp410        | 265   | 1.13 | 0.16 |             |  |
| 9130011E15Rik | 212   | 1.13 | 0.18 | NM_198296.1 |  |
| Tuba1b        | 54809 | 1.13 | 0.18 |             |  |
| 5730402C02Rik | 603   | 1.13 | 0.05 | NM_027442   |  |
| Olf1198       | 43    | 1.13 | 0.45 | NM_207567.1 |  |
| Capn5         | 816   | 1.13 | 0.01 | NM_007602.2 |  |
| 4631409F12Rik | 79    | 1.13 | 0.30 | AK028452    |  |
| 1810049N02Rik | 88    | 1.13 | 0.17 | AK007848    |  |
| Ube2l6        | 51    | 1.13 | 0.16 | NM_019949.1 |  |
| Cdk7          | 38    | 1.13 | 0.25 | NM_009874.1 |  |
| Pus3          | 1002  | 1.13 | 0.16 | NM_023292.2 |  |
| Leprel2       | 385   | 1.13 | 0.26 | NM_013534.1 |  |
| Zdhhc24       | 205   | 1.13 | 0.13 |             |  |
| 2510016D11Rik | 43    | 1.13 | 0.34 | XM_149660.1 |  |
| Aldh3b1       | 1024  | 1.13 | 0.12 | NM_026316.2 |  |
| 2900026A02Rik | 784   | 1.13 | 0.27 | NM_172884   |  |
| 6430512A10Rik | 3537  | 1.13 | 0.28 | XM_355585.1 |  |
| 2610029D06Rik | 1196  | 1.13 | 0.10 | NM_030199.2 |  |
| Hspa2         | 1506  | 1.13 | 0.10 | NM_008301.2 |  |
| Zdhhc14       | 57    | 1.13 | 0.40 | NM_146073.2 |  |
| Pcdh21        | 3160  | 1.13 | 0.35 | NM_130878.2 |  |
| Mpg           | 94    | 1.13 | 0.20 | NM_010822.2 |  |
| C330007D15Rik | 120   | 1.13 | 0.15 | XM_486010   |  |
| BC018222      | 103   | 1.13 | 0.31 | NM_144936.1 |  |
| Hspg2         | 131   | 1.13 | 0.15 | NM_008305.2 |  |
| BC006909      | 1613  | 1.13 | 0.18 | NM_145589.2 |  |
| 1700027M01Rik | 1048  | 1.13 | 0.03 | NM_023544.2 |  |

|               |      |      |      |             |  |
|---------------|------|------|------|-------------|--|
| Jund1         | 155  | 1.13 | 0.19 | NM_010592.3 |  |
| Slc25a10      | 232  | 1.13 | 0.15 | NM_013770   |  |
| D19Wsu12e     | 966  | 1.13 | 0.11 | XM_358328.1 |  |
| Pank4         | 2390 | 1.13 | 0.32 | NM_172990.1 |  |
| Cpeb1         | 229  | 1.13 | 0.25 | NM_007755.1 |  |
| Stard4        | 3483 | 1.13 | 0.14 | NM_133774.2 |  |
| Cst11         | 50   | 1.13 | 0.17 | XM_283777.2 |  |
| C430045M10Rik | 199  | 1.13 | 0.11 | AK049579    |  |
| F830004M19Rik | 66   | 1.13 | 0.24 | NM_177106.2 |  |
| Zfp191        | 1010 | 1.13 | 0.29 | NM_021559.1 |  |
| Eps811        | 47   | 1.13 | 0.22 | NM_026146.2 |  |
| 2900056M20Rik | 62   | 1.13 | 0.20 |             |  |
| Slc25a15      | 338  | 1.13 | 0.08 | NM_181325.2 |  |
| Cyp4f14       | 89   | 1.13 | 0.15 | NM_022434.1 |  |
| Arhgap9       | 121  | 1.13 | 0.26 | NM_146011.1 |  |
| Nnp1          | 317  | 1.13 | 0.20 | NM_010925.1 |  |
| Trcg1         | 61   | 1.12 | 0.23 |             |  |
| Zfp213        | 563  | 1.12 | 0.01 |             |  |
| A430073A17Rik | 54   | 1.12 | 0.44 | AK079805    |  |
| 4732473B16Rik | 44   | 1.12 | 0.33 | NM_175307.2 |  |
| A430075I06Rik | 40   | 1.12 | 0.49 | AK079811    |  |
| Nagk          | 747  | 1.12 | 0.11 | AK051368    |  |
| Fzd10         | 172  | 1.12 | 0.24 | NM_175284.3 |  |
| Gstz1         | 4853 | 1.12 | 0.13 | NM_010363.2 |  |
| 1110007C09Rik | 51   | 1.12 | 0.40 | NM_026738.1 |  |
| 2500002A22Rik | 405  | 1.12 | 0.21 | AK010848    |  |
| 9530046H09Rik | 358  | 1.12 | 0.19 | NM_145486.2 |  |
| 9630019K15Rik | 55   | 1.12 | 0.55 | NM_178774.3 |  |
| Slco4a1       | 460  | 1.12 | 0.28 | NM_148933.1 |  |
| 2610009I02Rik | 194  | 1.12 | 0.17 | NM_028115   |  |
| B230105J10    | 741  | 1.12 | 0.10 | XM_484075   |  |
| Mir           | 460  | 1.12 | 0.11 | NM_027920.3 |  |
| 4930515G13Rik | 106  | 1.12 | 0.18 | XM_484604   |  |
| Akna          | 93   | 1.12 | 0.66 |             |  |
| Clstn3        | 645  | 1.12 | 0.26 | NM_153508.2 |  |
| Impdh2        | 1506 | 1.12 | 0.34 | NM_011830   |  |
| Dync1li2      | 378  | 1.12 | 0.14 |             |  |
| Zfp95         | 813  | 1.12 | 0.14 | XM_355663.1 |  |
| AJ237586      | 6154 | 1.12 | 0.07 | XM_149747.1 |  |
| Trappc2       | 202  | 1.12 | 0.32 | NM_025432   |  |
| 4632419K20Rik | 914  | 1.12 | 0.29 | NM_199009.1 |  |
| 9330129D05Rik | 56   | 1.12 | 0.33 | NM_178799.2 |  |
| Snx7          | 248  | 1.12 | 0.35 | XM_131162.3 |  |
| BC085271      | 3230 | 1.12 | 0.25 |             |  |
| Lrrc49        | 2394 | 1.12 | 0.23 |             |  |
| Tyro3         | 90   | 1.12 | 0.36 | NM_019392   |  |
| E430019H13Rik | 1898 | 1.12 | 0.55 | XM_130073.3 |  |
| 2610034N24Rik | 3742 | 1.12 | 0.13 | NM_027256.1 |  |
| Bat2          | 352  | 1.12 | 0.15 | NM_020027.1 |  |
| Jmjd1b        | 34   | 1.12 | 0.68 | NM_029518.1 |  |
| Pgbd5         | 214  | 1.12 | 0.24 | NM_171824.1 |  |
| 2510048L02Rik | 41   | 1.12 | 1.29 | NM_025977.1 |  |
| Cdv3          | 7993 | 1.12 | 0.18 | NM_175833.1 |  |
| Aebp2         | 476  | 1.12 | 0.03 | AK045838    |  |
| Rtn2          | 1924 | 1.12 | 0.21 | NM_013648.4 |  |
| 0610009O20Rik | 887  | 1.12 | 0.18 | NM_024179.3 |  |
| Myo9b         | 1613 | 1.12 | 0.42 | NM_015742.1 |  |
| Dhx37         | 255  | 1.12 | 0.03 | NM_203319.1 |  |
| Lrrc8a        | 70   | 1.12 | 0.57 |             |  |
| Rpa2          | 503  | 1.12 | 0.27 | NM_011284.2 |  |
| LOC328703     | 1289 | 1.12 | 0.37 | XM_147224.2 |  |
| 2310046M24Rik | 372  | 1.12 | 0.15 | AK050690    |  |
| 2610524B01Rik | 500  | 1.12 | 0.32 | XM_355594   |  |
| 1110014P06Rik | 67   | 1.12 | 0.38 | NM_028634.2 |  |
| Pim3          | 4303 | 1.12 | 0.28 | NM_145478.1 |  |
| Cnot10        | 1064 | 1.12 | 0.11 | NM_153585.3 |  |
| Il6st         | 98   | 1.12 | 0.29 | NM_010560   |  |
| Sec24c        | 1515 | 1.12 | 0.10 | NM_172596.1 |  |

|                 |       |      |      |             |
|-----------------|-------|------|------|-------------|
| Vamp1           | 59    | 1.12 | 0.30 | NM_009496.2 |
| Idh3g           | 4866  | 1.12 | 0.11 | NM_008323.1 |
| 9030619K07Rik   | 565   | 1.12 | 0.32 | AK033556    |
| Drr1            | 5899  | 1.12 | 0.18 |             |
| Abcf2           | 3359  | 1.12 | 0.03 | NM_013853.1 |
| Mdk             | 64    | 1.12 | 0.31 | NM_010784.2 |
| Caacb3          | 490   | 1.12 | 0.23 | NM_007581.1 |
| Cbx5            | 278   | 1.12 | 0.11 | NM_007626.2 |
| Elf1            | 94    | 1.12 | 0.09 | NM_007920.2 |
| Gsg2            | 306   | 1.12 | 0.36 | NM_010353.1 |
| EG434171        | 66    | 1.12 | 0.30 |             |
| Aff1            | 233   | 1.12 | 0.10 |             |
| LOC381357       | 277   | 1.12 | 0.16 | XM_358557.1 |
| Dhcr24          | 123   | 1.12 | 0.48 | NM_053272.1 |
| D9Erttd402e     | 264   | 1.12 | 0.13 |             |
| 2300008B03Rik   | 299   | 1.12 | 0.28 | NM_175106   |
| Tbl1x           | 596   | 1.12 | 0.12 | NM_020601   |
| Sstr2           | 610   | 1.12 | 0.16 | NM_009217.1 |
| Ar              | 45    | 1.12 | 0.15 | NM_013476.2 |
| P2rx4           | 468   | 1.12 | 0.16 | NM_011026.1 |
| Psmc11          | 256   | 1.12 | 0.05 | NM_178616.2 |
| Eno1            | 17106 | 1.12 | 0.09 | NM_023119   |
| Wdr45l          | 671   | 1.12 | 0.14 |             |
| Dyrk4           | 57    | 1.12 | 0.47 | NM_207210   |
| Arpc1a          | 2883  | 1.12 | 0.11 | NM_019767.1 |
| Csnk2a2         | 987   | 1.12 | 0.13 | AK019507    |
| 2700067E09Rik   | 1041  | 1.12 | 0.22 | NM_175185.2 |
| Vps53           | 2039  | 1.12 | 0.03 |             |
| Zfpm1           | 4491  | 1.12 | 0.15 | NM_009569.1 |
| 4933429F08Rik   | 40    | 1.12 | 0.63 | NM_177828.2 |
| Foxl2           | 36    | 1.12 | 0.10 | NM_012020.1 |
| 2310028O11Rik   | 95    | 1.12 | 0.19 |             |
| C330046G03Rik   | 144   | 1.12 | 0.23 | NM_145855.1 |
| Pom121          | 1402  | 1.12 | 0.30 | NM_148932.1 |
| LOC328752       | 2060  | 1.12 | 0.14 | XM_283394.2 |
| Msh6            | 5116  | 1.12 | 0.21 | BC051160    |
| Gorasp2         | 3448  | 1.12 | 0.07 | NM_027352.2 |
| LOC268935       | 69    | 1.12 | 0.36 | XM_148768.4 |
| Xpo6            | 1195  | 1.12 | 0.12 | NM_028816   |
| Mknk1           | 1102  | 1.12 | 0.14 | NM_021461   |
| LOC245498       | 38    | 1.12 | 0.59 | XM_111986.2 |
| Tsc2            | 3021  | 1.12 | 0.15 | NM_011647   |
| Ube2e3          | 1248  | 1.12 | 0.12 | NM_009454   |
| Pqhc3           | 316   | 1.12 | 0.16 |             |
| Tsr2            | 233   | 1.12 | 0.09 |             |
| Osgepl1         | 492   | 1.12 | 0.09 | NM_028091.2 |
| Afg3l2          | 663   | 1.12 | 0.20 | XM_355115.1 |
| H2afy3          | 270   | 1.12 | 0.37 | NM_207000.1 |
| Cops4           | 3308  | 1.12 | 0.20 | NM_012001.1 |
| Slc1a3          | 105   | 1.12 | 0.34 | NM_148938.2 |
| Bcl2            | 469   | 1.12 | 0.07 | NM_177410.1 |
| Gng3            | 68    | 1.12 | 0.20 | NM_010316.2 |
| Atp6v0d1        | 2449  | 1.12 | 0.21 | NM_013477.2 |
| Tmem25          | 809   | 1.12 | 0.07 | NM_027865.1 |
| 1810022C23Rik   | 53    | 1.12 | 0.22 | NM_026947.2 |
| Sbk             | 1886  | 1.12 | 0.31 | NM_145587.1 |
| Mdm1            | 215   | 1.12 | 0.26 | NM_148922.2 |
| Kcnh1           | 31    | 1.12 | 0.43 | NM_010600.1 |
| IGKV2-137_AJ231 | 45    | 1.12 | 0.13 |             |
| Mdm2            | 3118  | 1.12 | 0.06 | NM_010786.2 |
| Mbd3l2          | 53    | 1.12 | 0.34 | NM_144934.2 |
| Shc1            | 2104  | 1.12 | 0.09 | NM_011368.3 |
| 4930445K14Rik   | 179   | 1.12 | 0.30 |             |
| Srebf2          | 116   | 1.12 | 0.18 | AK032847    |
| Rhobtb1         | 288   | 1.12 | 0.20 | XM_125637   |
| Copb2           | 6832  | 1.12 | 0.13 | NM_015827.1 |
| Nsdp1           | 1053  | 1.12 | 0.18 | NM_016710.1 |
| Pctk1           | 2083  | 1.12 | 0.31 | NM_011049.2 |

|               |       |      |      |             |  |
|---------------|-------|------|------|-------------|--|
| LOC234486     | 398   | 1.12 | 0.18 | XM_134462.2 |  |
| Decr2         | 172   | 1.12 | 0.20 | NM_011933.1 |  |
| Tpra40        | 280   | 1.12 | 0.19 | NM_011906.1 |  |
| Nup210        | 9930  | 1.12 | 0.15 | NM_018815.1 |  |
| Wdr5          | 577   | 1.12 | 0.24 | NM_080848.1 |  |
| 4933428G09Rik | 74    | 1.12 | 0.34 | NM_025755.2 |  |
| Tor1b         | 1126  | 1.12 | 0.07 | NM_133673.2 |  |
| D430023G06Rik | 172   | 1.12 | 0.02 | AK052440    |  |
| LOC241989     | 81    | 1.12 | 0.32 | XM_143201.2 |  |
| E030004D24Rik | 45    | 1.12 | 0.18 | AK086841    |  |
| 3300001M20Rik | 783   | 1.12 | 0.09 | NM_175113.1 |  |
| Rnf41         | 147   | 1.12 | 0.13 | NM_026259.2 |  |
| Taf5l         | 505   | 1.12 | 0.09 | NM_133966.1 |  |
| Dtnbp1        | 3180  | 1.12 | 0.06 | NM_025772.3 |  |
| Slc12a9       | 187   | 1.12 | 0.04 | NM_031406.2 |  |
| Hnrpm         | 6541  | 1.12 | 0.12 | NM_029804.1 |  |
| Atp5a1        | 2669  | 1.12 | 0.12 | NM_007505.1 |  |
| LOC622665     | 58    | 1.12 | 0.34 |             |  |
| Mapkapk3      | 283   | 1.12 | 0.15 | NM_178907   |  |
| Nmb           | 61    | 1.12 | 0.45 | NM_026523.1 |  |
| Dok1          | 133   | 1.12 | 0.21 | NM_010070.3 |  |
| Aplp1         | 1003  | 1.12 | 0.52 | NM_007467.1 |  |
| E430028B21Rik | 247   | 1.12 | 0.23 | NM_178668   |  |
| 2410015J15Rik | 1928  | 1.12 | 0.11 |             |  |
| Mark4         | 110   | 1.12 | 0.35 | NM_172279.1 |  |
| D3Erttd194e   | 6253  | 1.12 | 0.11 | XM_130881.3 |  |
| Rab11fip5     | 635   | 1.12 | 0.12 | XM_358365.1 |  |
| Tpm1          | 2094  | 1.12 | 0.24 | NM_024427   |  |
| 4933434E20Rik | 2372  | 1.12 | 0.06 | NM_027500.1 |  |
| G630008C18Rik | 36    | 1.12 | 0.16 | AK090160    |  |
| 2610507L03Rik | 745   | 1.12 | 0.06 | NM_028120.1 |  |
| Pgm2          | 12331 | 1.12 | 0.07 | NM_028132   |  |
| Edem2         | 215   | 1.12 | 0.15 |             |  |
| 2610022G08Rik | 49    | 1.12 | 0.16 | NM_025574.2 |  |
| Khk           | 72    | 1.12 | 0.03 | NM_008439.2 |  |
| Rnf139        | 72    | 1.12 | 0.36 | NM_175226.2 |  |
| 1110007A13Rik | 1667  | 1.12 | 0.02 | NM_145955.2 |  |
| Casp6         | 356   | 1.12 | 0.16 | NM_009811.2 |  |
| 5930418K15Rik | 1382  | 1.12 | 0.12 | XM_355635.1 |  |
| Pappa2        | 1810  | 1.12 | 0.03 | XM_358337.1 |  |
| Kcnn3         | 111   | 1.12 | 0.26 | NM_080466.1 |  |
| LOC234081     | 539   | 1.12 | 0.12 | XM_134040.5 |  |
| Tcirg1        | 169   | 1.12 | 0.08 | NM_016921.2 |  |
| 4930418I18Rik | 70    | 1.12 | 0.44 | AK029637    |  |
| C1qr1         | 58    | 1.12 | 0.06 | NM_010740.1 |  |
| Epb4.9        | 250   | 1.12 | 0.08 | NM_013514   |  |
| Gck           | 383   | 1.12 | 0.16 | NM_010292.3 |  |
| C630022N07Rik | 2525  | 1.12 | 0.44 |             |  |
| Prcc          | 119   | 1.12 | 0.27 | NM_033573   |  |
| Mrpl35        | 326   | 1.12 | 0.33 | NM_025430.1 |  |
| Lrig1         | 892   | 1.12 | 0.14 | NM_008377.1 |  |
| Etv6          | 43    | 1.12 | 0.53 | NM_007961.2 |  |
| Pygo2         | 3988  | 1.12 | 0.20 | XM_130932.5 |  |
| 1810003N24Rik | 1989  | 1.12 | 0.47 | NM_025443.1 |  |
| D030044M21Rik | 379   | 1.12 | 0.25 | AK050956    |  |
| Fcho1         | 646   | 1.12 | 0.21 | NM_028715.2 |  |
| Adra2a        | 74    | 1.12 | 0.36 | NM_007417.1 |  |
| 2410039M03Rik | 126   | 1.12 | 0.04 |             |  |
| 2810012G03Rik | 2616  | 1.12 | 0.06 | NM_175104.3 |  |
| 1200011M11Rik | 42    | 1.12 | 0.57 | NM_024262.1 |  |
| LOC239416     | 41    | 1.12 | 0.10 | XM_139484.2 |  |
| 1700048E23Rik | 2023  | 1.12 | 0.16 | NM_028521.1 |  |
| Ppp3ca        | 471   | 1.12 | 0.06 | NM_008913.1 |  |
| Rgs9bp        | 128   | 1.12 | 0.08 | NM_145840.2 |  |
| Enpp5         | 165   | 1.12 | 0.27 | NM_032003.1 |  |
| Kif13a        | 132   | 1.12 | 0.25 | NM_010617.1 |  |
| 2700090O03Rik | 78    | 1.12 | 0.07 | XM_150062.1 |  |
| Ris2          | 6595  | 1.12 | 0.06 | NM_026014.3 |  |

|               |       |      |      |             |  |
|---------------|-------|------|------|-------------|--|
| Galnt2        | 1758  | 1.12 | 0.18 | NM_139272.2 |  |
| Paip1         | 168   | 1.12 | 0.43 | NM_145457.2 |  |
| Sf3b2         | 10036 | 1.12 | 0.18 | NM_030109.1 |  |
| Lyplal1       | 953   | 1.12 | 0.02 | NM_146106.1 |  |
| 6820406G21Rik | 621   | 1.12 | 0.08 | AK078477    |  |
| Rps6ka1       | 1610  | 1.12 | 0.28 | NM_009097   |  |
| Galnt12       | 566   | 1.12 | 0.18 | NM_172693.2 |  |
| Atp9b         | 297   | 1.12 | 0.04 | NM_015805   |  |
| 2400010D15Rik | 1791  | 1.12 | 0.05 | NM_029623.1 |  |
| Gatad1        | 908   | 1.12 | 0.05 |             |  |
| lfrd2         | 137   | 1.12 | 0.20 | NM_025903.1 |  |
| 3110023G01Rik | 90    | 1.12 | 0.43 | AK014074    |  |
| LOC333789     | 34    | 1.12 | 0.35 | XM_290115.2 |  |
| Ddx39         | 50    | 1.11 | 0.46 | NM_197982.2 |  |
| 1810026J23Rik | 1067  | 1.11 | 0.13 | NM_178619.3 |  |
| Dtx1          | 791   | 1.11 | 0.30 | NM_008052.1 |  |
| Anp32b        | 195   | 1.11 | 0.22 | NM_130889.1 |  |
| Skap2         | 3277  | 1.11 | 0.10 |             |  |
| LOC331102     | 4537  | 1.11 | 0.01 | XM_284573.2 |  |
| LOC226283     | 76    | 1.11 | 0.37 | XM_123435.4 |  |
| LOC269941     | 128   | 1.11 | 0.18 | XM_194358.2 |  |
| Otop2         | 79    | 1.11 | 0.42 | NM_172801.1 |  |
| Ppp1r10       | 860   | 1.11 | 0.05 | NM_175934.2 |  |
| Spg21         | 2102  | 1.11 | 0.23 | NM_138584.1 |  |
| Alg8          | 411   | 1.11 | 0.08 | NM_199035   |  |
| Prkwnk4       | 60    | 1.11 | 0.26 | NM_175638   |  |
| Car10         | 33    | 1.11 | 0.49 | XM_126517.4 |  |
| Pabpc4        | 1931  | 1.11 | 0.14 | NM_130881   |  |
| C630030A18Rik | 263   | 1.11 | 0.11 | AK083235    |  |
| Ripk1         | 511   | 1.11 | 0.07 | NM_009068.3 |  |
| Cd79a         | 53    | 1.11 | 0.98 | NM_007655.1 |  |
| Snx24         | 3741  | 1.11 | 0.26 | NM_029394.2 |  |
| Atxn7l2       | 193   | 1.11 | 0.08 | NM_175183.2 |  |
| Ptpn21        | 62    | 1.11 | 0.25 | AK013777    |  |
| ldh3a         | 401   | 1.11 | 0.10 | NM_029573.2 |  |
| Acac          | 2209  | 1.11 | 0.17 | XM_109883.4 |  |
| 4632409L19Rik | 187   | 1.11 | 0.32 | XM_355376.1 |  |
| Sca1          | 231   | 1.11 | 0.14 | NM_009124.2 |  |
| Sqstm1        | 8294  | 1.11 | 0.26 | NM_011018.1 |  |
| C030046l01Rik | 339   | 1.11 | 0.46 | NM_177994   |  |
| Psm2          | 2519  | 1.11 | 0.01 | NM_134101.1 |  |
| Nr1h2         | 580   | 1.11 | 0.32 | AK054508    |  |
| Sirt2         | 566   | 1.11 | 0.42 | NM_022432.2 |  |
| 5730403B10Rik | 90    | 1.11 | 0.20 | NM_025670.2 |  |
| C030005l21Rik | 67    | 1.11 | 0.38 | AK081212    |  |
| Zfp523        | 901   | 1.11 | 0.19 | NM_172617.1 |  |
| Wiz           | 167   | 1.11 | 0.24 | AK005208    |  |
| Csnk1e        | 1860  | 1.11 | 0.32 | NM_013767.3 |  |
| Fabp5         | 421   | 1.11 | 0.15 | NM_010634.1 |  |
| Pgam1         | 1383  | 1.11 | 0.08 | NM_023418.1 |  |
| LOC382213     | 66    | 1.11 | 0.19 | XM_356326.1 |  |
| Galns         | 69    | 1.11 | 0.05 | NM_016722   |  |
| Bche          | 59    | 1.11 | 0.06 | NM_009738.1 |  |
| 0610012D14Rik | 52    | 1.11 | 0.14 | NM_026690.1 |  |
| LOC227078     | 35    | 1.11 | 0.27 | XM_136604.2 |  |
| Cs            | 3653  | 1.11 | 0.02 | NM_026444.2 |  |
| Agpat3        | 196   | 1.11 | 0.26 | NM_053014.2 |  |
| Iqgap3        | 310   | 1.11 | 0.07 |             |  |
| LOC654467     | 2822  | 1.11 | 0.07 |             |  |
| D0Kist3       | 430   | 1.11 | 0.17 |             |  |
| BC017133      | 1436  | 1.11 | 0.06 | NM_146169   |  |
| Hadhb         | 3562  | 1.11 | 0.28 | NM_145558.1 |  |
| 6330417G03Rik | 131   | 1.11 | 0.17 |             |  |
| 5730525O22Rik | 743   | 1.11 | 0.10 | AK017789    |  |
| Siat4a        | 56    | 1.11 | 0.48 | NM_009177   |  |
| Slc11a2       | 168   | 1.11 | 0.18 | AK083478    |  |
| Btbd6         | 771   | 1.11 | 0.19 | NM_201646   |  |
| 1700047l17Rik | 763   | 1.11 | 0.04 | NM_028527.1 |  |

|                |      |      |      |             |  |
|----------------|------|------|------|-------------|--|
| Cyp4f16        | 190  | 1.11 | 0.08 | NM_024442.1 |  |
| Ppp2r5e        | 2768 | 1.11 | 0.30 | NM_012024.1 |  |
| Rab35          | 2981 | 1.11 | 0.05 | NM_198163.1 |  |
| C330008L01Rik  | 1306 | 1.11 | 0.17 | NM_175351   |  |
| Trp53bp1       | 2604 | 1.11 | 0.17 | NM_013735.2 |  |
| A130042E20Rik  | 170  | 1.11 | 0.26 | NM_172550.2 |  |
| 2810417H13Rik  | 289  | 1.11 | 0.06 | NM_026515.1 |  |
| C85492         | 1988 | 1.11 | 0.20 | NM_153540.2 |  |
| Dnajb6         | 1697 | 1.11 | 0.10 | AK005680    |  |
| scl0002064.1_2 | 662  | 1.11 | 0.13 |             |  |
| C130053D24Rik  | 43   | 1.11 | 0.33 | AK081622    |  |
| 4932439K10Rik  | 5240 | 1.11 | 0.17 | NM_153406.1 |  |
| F830021D11Rik  | 398  | 1.11 | 0.10 |             |  |
| Litaf          | 7069 | 1.11 | 0.06 | NM_019980.1 |  |
| Adm            | 185  | 1.11 | 0.17 | NM_009627.1 |  |
| 2310003H01Rik  | 961  | 1.11 | 0.23 | XM_126658.3 |  |
| Plec1          | 376  | 1.11 | 0.24 | NM_201393.1 |  |
| LOC381770      | 39   | 1.11 | 0.72 | XM_355767.1 |  |
| Nphp1          | 350  | 1.11 | 0.13 | NM_016902.1 |  |
| D8Erttd812e    | 360  | 1.11 | 0.12 | NM_198020.1 |  |
| Echdc2         | 2101 | 1.11 | 0.37 |             |  |
| Pcbp2          | 3783 | 1.11 | 0.23 | AK048345    |  |
| 2810416G20Rik  | 33   | 1.11 | 0.20 | XM_487719   |  |
| Ecgf1          | 63   | 1.11 | 0.39 | NM_138302.1 |  |
| H13            | 829  | 1.11 | 0.20 | AK039008    |  |
| E130318A13Rik  | 56   | 1.11 | 0.04 | AK053879    |  |
| C130078N17Rik  | 126  | 1.11 | 0.18 |             |  |
| BC046404       | 1090 | 1.11 | 0.09 | NM_198861.1 |  |
| 1520401A03Rik  | 34   | 1.11 | 0.28 | NM_177132.2 |  |
| Sec61a1        | 2303 | 1.11 | 0.13 |             |  |
| AW491445       | 222  | 1.11 | 0.05 | NM_134154.1 |  |
| Hrmt111        | 2705 | 1.11 | 0.12 | NM_133182   |  |
| Ski            | 189  | 1.11 | 0.16 | NM_011385   |  |
| Tfam           | 1240 | 1.11 | 0.13 | NM_009360.2 |  |
| 1300010K09Rik  | 124  | 1.11 | 0.18 | NM_138303.1 |  |
| Vps4a          | 829  | 1.11 | 0.06 | NM_126165.1 |  |
| BC020354       | 1165 | 1.11 | 0.30 | NM_198110.1 |  |
| 9330175B10Rik  | 183  | 1.11 | 0.23 | NM_194351.1 |  |
| Numa1          | 420  | 1.11 | 0.28 | NM_133947.2 |  |
| Olfir824       | 62   | 1.11 | 0.31 | NM_146674.1 |  |
| LOC269529      | 2223 | 1.11 | 0.14 | XM_194139.2 |  |
| lfnar2         | 88   | 1.11 | 0.21 | NM_010509.1 |  |
| LOC382174      | 45   | 1.11 | 0.13 | XM_356275.1 |  |
| Map3k7ip1      | 439  | 1.11 | 0.09 | NM_025609.2 |  |
| 6230412O07Rik  | 51   | 1.11 | 0.26 | AK031765    |  |
| Hdh            | 128  | 1.11 | 0.49 | NM_010414.1 |  |
| Spg7           | 1376 | 1.11 | 0.36 | NM_153176.3 |  |
| A130092J06Rik  | 79   | 1.11 | 0.71 | NM_175511.2 |  |
| Rnf8           | 730  | 1.11 | 0.09 | NM_021419.1 |  |
| Zfp30          | 326  | 1.11 | 0.02 | NM_013705.1 |  |
| 2410005K20Rik  | 9297 | 1.11 | 0.08 | NM_025546.1 |  |
| Fbxo9          | 642  | 1.11 | 0.29 | NM_023605.1 |  |
| Trim27         | 650  | 1.11 | 0.17 | NM_009054.1 |  |
| Sympk          | 755  | 1.11 | 0.31 | XM_485873   |  |
| Mybbp1a        | 1039 | 1.11 | 0.16 | NM_016776   |  |
| 2810409C01Rik  | 50   | 1.11 | 0.13 |             |  |
| BC019561       | 179  | 1.11 | 0.21 | NM_144867.1 |  |
| Zfp96          | 1318 | 1.11 | 0.09 | NM_016684.1 |  |
| Hnrpa1         | 1668 | 1.11 | 0.08 | XM_122922.1 |  |
| Lrfn1          | 70   | 1.11 | 0.35 | NM_030562.1 |  |
| Rpa1           | 8969 | 1.11 | 0.14 | NM_026653.1 |  |
| Cam1           | 569  | 1.11 | 0.06 | NM_007596.1 |  |
| Senp2          | 6527 | 1.11 | 0.18 | NM_029457.2 |  |
| Sec22b         | 1054 | 1.11 | 0.30 |             |  |
| LOC386294      | 216  | 1.11 | 0.47 | XM_359162.1 |  |
| 2700024D06Rik  | 136  | 1.11 | 0.27 | AK076051    |  |
| Gse1           | 584  | 1.11 | 0.27 | NM_198671   |  |
| Ube2l3         | 8584 | 1.11 | 0.05 | XM_148568.1 |  |

|                 |      |      |      |              |  |
|-----------------|------|------|------|--------------|--|
| BC013529        | 2286 | 1.11 | 0.08 | NM_145418.1  |  |
| 1500003O22Rik   | 130  | 1.11 | 0.22 | NM_025897.1  |  |
| D230004N01Rik   | 1096 | 1.11 | 0.20 | AK051815     |  |
| scl0002824.1_16 | 34   | 1.11 | 0.44 |              |  |
| 9630025H16Rik   | 929  | 1.11 | 0.25 |              |  |
| Hist1h3h        | 1870 | 1.11 | 0.07 | NM_178206    |  |
| Retnla          | 30   | 1.11 | 0.91 | NM_020509.2  |  |
| Wfs1            | 199  | 1.11 | 0.19 | NM_011716.1  |  |
| Tirap           | 153  | 1.11 | 0.10 | NM_054096.1  |  |
| 6720460L05Rik   | 9595 | 1.11 | 0.08 | AK032838     |  |
| Agpat1          | 288  | 1.11 | 0.46 | NM_018862.2  |  |
| B230113M03Rik   | 7382 | 1.11 | 0.02 | XM_109923.4  |  |
| LOC240261       | 232  | 1.11 | 0.16 | XM_140320.2  |  |
| Rab40c          | 2680 | 1.11 | 0.13 | NM_139154.1  |  |
| Pdpx            | 3077 | 1.11 | 0.26 | NM_020271.1  |  |
| LOC381201       | 192  | 1.11 | 0.03 | XM_355134.1  |  |
| Slc4a8          | 338  | 1.11 | 0.16 | AK050563     |  |
| 1110067L22Rik   | 380  | 1.11 | 0.30 | NM_026855    |  |
| BC026590        | 1179 | 1.11 | 0.20 | XM_485382    |  |
| 9830134K01Rik   | 91   | 1.11 | 0.29 | AK036567     |  |
| B930008G03Rik   | 1159 | 1.11 | 0.15 | AK046967     |  |
| Rab34           | 442  | 1.11 | 0.28 | NM_033475.2  |  |
| Nudt3           | 39   | 1.11 | 0.23 | NM_019837.1  |  |
| C77370          | 680  | 1.11 | 0.14 | XM_205178.2  |  |
| Ipo8            | 724  | 1.11 | 0.28 | XM_132974.3  |  |
| 4933402E03Rik   | 74   | 1.11 | 0.34 |              |  |
| Grpel2          | 188  | 1.11 | 0.53 | NM_021296    |  |
| Sfxn5           | 62   | 1.11 | 0.04 | NM_178639.2  |  |
| 2810468K05Rik   | 493  | 1.11 | 0.13 | NM_144825.1  |  |
| LOC236371       | 415  | 1.11 | 0.18 | XM_135639.2  |  |
| Pcdhga10        | 49   | 1.11 | 0.09 | NM_033593.2  |  |
| H2-Q6           | 95   | 1.11 | 0.13 | NM_207648    |  |
| 2410017I18Rik   | 419  | 1.11 | 0.09 | NM_025547.1  |  |
| A530025E09Rik   | 82   | 1.11 | 0.11 | AK040788     |  |
| Bcl10           | 748  | 1.11 | 0.18 | AK080820     |  |
| Slc5a6          | 741  | 1.11 | 0.14 | NM_177870.2  |  |
| 1810019J16Rik   | 100  | 1.11 | 0.49 | NM_133707.1  |  |
| Uaca            | 1738 | 1.11 | 0.11 | NM_028283    |  |
| Aqp5            | 136  | 1.11 | 0.14 | NM_009701.1  |  |
| Slc16a5         | 136  | 1.11 | 0.12 | XM_126601    |  |
| Trim28          | 7001 | 1.11 | 0.11 | NM_011588.1  |  |
| Snf1lk          | 355  | 1.11 | 0.28 | NM_010831.1  |  |
| 1200009F10Rik   | 73   | 1.11 | 0.10 | NM_026166.1  |  |
| BC055107        | 93   | 1.11 | 0.93 | NM_183187.2  |  |
| 0610039G24Rik   | 383  | 1.11 | 0.13 | XM_132020.4  |  |
| 6430527G18Rik   | 881  | 1.11 | 0.20 | NM_145836    |  |
| Akp2            | 75   | 1.11 | 0.27 | NM_007431.1  |  |
| LOC279638       | 36   | 1.11 | 0.47 | XM_205256.3  |  |
| Inpp5a          | 893  | 1.11 | 0.07 | NM_183144.1  |  |
| Pacrg           | 1344 | 1.11 | 0.42 | XM_128418.1  |  |
| Tessp2          | 117  | 1.11 | 0.24 | NM_153099.1  |  |
| D930002C22Rik   | 48   | 1.11 | 0.51 | AK086066     |  |
| Usp2            | 321  | 1.11 | 0.47 | NM_198091.1  |  |
| 6430571L13Rik   | 125  | 1.11 | 0.24 | NM_175486.1  |  |
| A130053G17Rik   | 116  | 1.11 | 0.17 | AK037834     |  |
| Trabd           | 425  | 1.11 | 0.09 |              |  |
| Zfp313          | 652  | 1.11 | 0.14 | NM_030743.3  |  |
| 9530066K23Rik   | 38   | 1.11 | 0.44 | NM_172524.1  |  |
| Tsyp11          | 337  | 1.11 | 0.05 | NM_009433.2  |  |
| Usp39           | 2667 | 1.11 | 0.06 | NM_138592.1  |  |
| 1500011J06Rik   | 1384 | 1.11 | 0.15 | NM_001005523 |  |
| 3322402L07Rik   | 34   | 1.11 | 0.24 | NM_023727.1  |  |
| 1500002O20Rik   | 35   | 1.11 | 1.19 | NM_028047.1  |  |
| 1110033C18Rik   | 100  | 1.11 | 0.08 | NM_133964.1  |  |
| Ltb4dh          | 43   | 1.11 | 0.49 | NM_025968.2  |  |
| Zswim4          | 295  | 1.11 | 0.37 | NM_172503.2  |  |
| Nphp4           | 2330 | 1.11 | 0.09 | NM_153424.1  |  |
| Mcm7            | 1223 | 1.11 | 0.04 | NM_008568.1  |  |

|               |      |      |      |             |  |
|---------------|------|------|------|-------------|--|
| Smarca4       | 450  | 1.11 | 0.18 | NM_011417.1 |  |
| Mic211        | 1548 | 1.11 | 0.16 | NM_138309.1 |  |
| Gipc1         | 341  | 1.11 | 0.32 |             |  |
| Olfir503      | 42   | 1.11 | 0.42 |             |  |
| 6330503K22Rik | 1691 | 1.11 | 0.15 | NM_182995.1 |  |
| lsg20l2       | 1535 | 1.11 | 0.33 |             |  |
| Sec22l2       | 128  | 1.10 | 0.13 | NM_133704.3 |  |
| 2210019E14Rik | 860  | 1.10 | 0.14 | XM_129145   |  |
| Pdcl3         | 288  | 1.10 | 0.11 | NM_026850.2 |  |
| Smu1          | 1517 | 1.10 | 0.17 | NM_021535.2 |  |
| 2610024N01Rik | 490  | 1.10 | 0.11 | NM_027931.1 |  |
| AW050020      | 245  | 1.10 | 0.44 | NM_172943.2 |  |
| 2610014H22Rik | 845  | 1.10 | 0.26 | XM_194342.3 |  |
| LOC385681     | 46   | 1.10 | 0.17 | XM_358910.1 |  |
| Trim46        | 343  | 1.10 | 0.17 | XM_355447.1 |  |
| 6030446N20Rik | 48   | 1.10 | 0.27 | NM_178801.2 |  |
| Stambp        | 1895 | 1.10 | 0.13 | NM_024239.1 |  |
| LOC229883     | 38   | 1.10 | 0.25 | XM_143600.3 |  |
| Zfp341        | 65   | 1.10 | 0.50 | NM_199304.1 |  |
| Ccrk          | 388  | 1.10 | 0.12 | NM_053180.2 |  |
| 9530048O09Rik | 225  | 1.10 | 0.04 | XM_358611   |  |
| Lgtn          | 519  | 1.10 | 0.09 | NM_010709.1 |  |
| D430042L13Rik | 135  | 1.10 | 0.10 | AK085139    |  |
| lhpk2         | 66   | 1.10 | 0.85 |             |  |
| Stx5a         | 1754 | 1.10 | 0.13 | NM_019829.3 |  |
| Pnpla6        | 198  | 1.10 | 0.29 |             |  |
| 5730527J01Rik | 499  | 1.10 | 0.09 | AK017794    |  |
| Myrip         | 309  | 1.10 | 0.36 | NM_144557.2 |  |
| ltpr1         | 682  | 1.10 | 0.29 | AK087694    |  |
| 4833413G10Rik | 130  | 1.10 | 0.03 | XM_149575.1 |  |
| Arc           | 104  | 1.10 | 0.26 | NM_018790.1 |  |
| Kdelc1        | 1089 | 1.10 | 0.09 | NM_023645.2 |  |
| Ttc4          | 507  | 1.10 | 0.17 | NM_028209.1 |  |
| D630048P19Rik | 742  | 1.10 | 0.28 | NM_207525.1 |  |
| Sepn1         | 2860 | 1.10 | 0.04 | NM_029100.1 |  |
| Dhrs1         | 1104 | 1.10 | 0.30 | NM_026819.2 |  |
| C030024L24Rik | 136  | 1.10 | 0.22 | AK081245    |  |
| 2310045A20Rik | 1905 | 1.10 | 0.08 | NM_172710.1 |  |
| Sox11         | 1411 | 1.10 | 0.17 | NM_009234.3 |  |
| Gch1          | 2346 | 1.10 | 0.10 | NM_008102.2 |  |
| Kcnk2         | 143  | 1.10 | 0.16 | NM_010607.1 |  |
| 1110035L05Rik | 86   | 1.10 | 0.33 | NM_026125.1 |  |
| Cnot4         | 249  | 1.10 | 0.12 | NM_016877   |  |
| Wdr18         | 217  | 1.10 | 0.18 | NM_175450   |  |
| Ddef1         | 69   | 1.10 | 0.51 |             |  |
| Ankmy2        | 1589 | 1.10 | 0.14 | NM_146033.2 |  |
| 1700017G19Rik | 36   | 1.10 | 0.24 | XM_485224   |  |
| 4632425I16Rik | 50   | 1.10 | 0.61 | AK028542    |  |
| AU022870      | 3199 | 1.10 | 0.30 | NM_177682.3 |  |
| BC049762      | 39   | 1.10 | 0.36 | NM_177567.2 |  |
| Klk26         | 2362 | 1.10 | 0.51 | NM_010644.1 |  |
| LOC381406     | 312  | 1.10 | 0.18 | XM_355368.1 |  |
| Egfl9         | 59   | 1.10 | 0.07 | NM_207666.1 |  |
| LOC381787     | 132  | 1.10 | 0.18 | XM_358652.1 |  |
| Ptdc2         | 452  | 1.10 | 0.09 | XM_127497.2 |  |
| Rhpn2         | 265  | 1.10 | 0.39 | NM_027897.2 |  |
| D030051D21    | 673  | 1.10 | 0.31 | NM_172531.2 |  |
| 9130011J15Rik | 1443 | 1.10 | 0.19 | NM_172396   |  |
| Uap111        | 388  | 1.10 | 0.16 | XM_130172.4 |  |
| LOC211823     | 113  | 1.10 | 0.32 | XM_131191.4 |  |
| Oxsr1         | 424  | 1.10 | 0.08 |             |  |
| Sfxn2         | 53   | 1.10 | 0.18 | NM_053196.2 |  |
| 2410004A20Rik | 38   | 1.10 | 0.05 | NM_025890.1 |  |
| D1Ertid161e   | 598  | 1.10 | 0.15 | NM_026187.3 |  |
| 2900016G23Rik | 90   | 1.10 | 0.40 | XM_147738.1 |  |
| 3000003F02Rik | 533  | 1.10 | 0.21 | NM_172437.1 |  |
| Mpp2          | 140  | 1.10 | 0.57 | NM_016695.1 |  |
| BC019206      | 131  | 1.10 | 0.11 | NM_183426.1 |  |



|                  |       |      |      |              |  |
|------------------|-------|------|------|--------------|--|
| D11Ert497e       | 3225  | 1.10 | 0.31 | NM_029976.2  |  |
| LOC236060        | 55    | 1.10 | 0.57 | XM_135472.3  |  |
| BC038479         | 54    | 1.10 | 0.51 | NM_153803.1  |  |
| Wdr51b           | 572   | 1.10 | 0.49 |              |  |
| 2810410A03Rik    | 1805  | 1.10 | 0.07 |              |  |
| Dhx30            | 1974  | 1.10 | 0.08 | BC016202     |  |
| LOC228003        | 609   | 1.10 | 0.12 | XM_130293.2  |  |
| Mto1             | 944   | 1.10 | 0.11 | NM_026658.1  |  |
| 9430010A17Rik    | 326   | 1.10 | 0.13 | AK079112     |  |
| Rarsl            | 1476  | 1.10 | 0.09 | NM_181406.2  |  |
| 4631410M14Rik    | 111   | 1.10 | 0.27 | AK028460     |  |
| Htatip           | 276   | 1.10 | 0.17 | NM_178637.1  |  |
| 1700001F22Rik    | 39    | 1.10 | 0.35 | NM_027036.1  |  |
| Vrk1             | 467   | 1.10 | 0.12 | AK039554     |  |
| 9330179O15Rik    | 116   | 1.10 | 0.08 |              |  |
| 2610044O15Rik    | 153   | 1.10 | 0.15 | NM_153780.1  |  |
| Rbm43            | 873   | 1.10 | 0.20 |              |  |
| BC046331         | 1523  | 1.10 | 0.07 | NM_177673    |  |
| Tpm3             | 1743  | 1.10 | 0.22 | NM_022314    |  |
| Spo11            | 42    | 1.10 | 0.28 | NM_012046    |  |
| Cdan1            | 720   | 1.10 | 0.35 | XM_485054    |  |
| 0710001B24Rik    | 926   | 1.10 | 0.36 | NM_175118    |  |
| LOC433224        | 1828  | 1.10 | 0.09 |              |  |
| scl0001333.1_125 | 145   | 1.10 | 0.45 |              |  |
| Chd1l            | 51    | 1.10 | 0.34 | NM_026539.1  |  |
| Pscd3            | 848   | 1.10 | 0.18 | NM_011182.2  |  |
| Pmm2             | 1352  | 1.10 | 0.12 | NM_016881.1  |  |
| Zfp39            | 250   | 1.10 | 0.13 | NM_011758.1  |  |
| Fbs1             | 202   | 1.10 | 0.17 | XM_284344.2  |  |
| 5730509C05Rik    | 957   | 1.10 | 0.22 | NM_197940.1  |  |
| 6430567E01Rik    | 251   | 1.10 | 0.07 |              |  |
| LOC384318        | 219   | 1.10 | 0.13 | XM_357565.1  |  |
| B930095G15Rik    | 133   | 1.10 | 0.26 | NM_177121.2  |  |
| 2410006F12Rik    | 1313  | 1.10 | 0.19 | NM_028020.2  |  |
| Pbx2             | 225   | 1.10 | 0.06 | NM_017463.1  |  |
| Maz              | 45    | 1.10 | 0.23 | XM_133827.2  |  |
| Ftsj2            | 35    | 1.10 | 0.32 | NM_026510.1  |  |
| Hrbl             | 1042  | 1.10 | 0.14 | NM_145566.1  |  |
| scl000231.1_58   | 304   | 1.10 | 0.30 |              |  |
| Rmnd1            | 844   | 1.10 | 0.11 |              |  |
| Prkcd            | 1019  | 1.10 | 0.27 | NM_011103.1  |  |
| 5830407P18Rik    | 149   | 1.10 | 0.02 | XM_147876.1  |  |
| Lrfr4            | 52    | 1.10 | 0.75 | NM_153388.2  |  |
| Ctps             | 4444  | 1.10 | 0.05 | NM_016748.1  |  |
| Fkrp             | 221   | 1.10 | 0.13 | NM_173430.1  |  |
| Elov15           | 6535  | 1.10 | 0.27 | NM_134255.2  |  |
| Scap             | 1108  | 1.10 | 0.34 | XM_135190.4  |  |
| Serhl            | 151   | 1.10 | 0.12 | NM_023475.2  |  |
| AI481316         | 13795 | 1.10 | 0.09 | XM_148986.1  |  |
| Gbas             | 1101  | 1.10 | 0.14 | NM_008095.1  |  |
| Prim2            | 859   | 1.10 | 0.04 | NM_008922.1  |  |
| 0610010I05Rik    | 17460 | 1.10 | 0.10 | AK018737     |  |
| 8430429K09Rik    | 84    | 1.10 | 0.23 |              |  |
| Ttc13            | 4533  | 1.10 | 0.08 | XM_358379.1  |  |
| Rpo2tc1          | 816   | 1.10 | 0.29 | NM_0111294.2 |  |
| Trfp             | 429   | 1.10 | 0.09 | AK041624     |  |
| 4930427A07Rik    | 864   | 1.10 | 0.12 | NM_134041.1  |  |
| 18S_rRNA_X0068   | 60106 | 1.10 | 0.08 |              |  |
| Manba            | 809   | 1.10 | 0.12 | NM_027288.2  |  |
| Marcks           | 4969  | 1.10 | 0.39 | NM_008538    |  |
| E030010A14       | 77    | 1.10 | 0.23 | NM_183160.1  |  |
| S100a16          | 56    | 1.10 | 0.16 | NM_026416.2  |  |
| Gnat2            | 32    | 1.10 | 0.88 | NM_008141.2  |  |
| Slc29a1          | 1250  | 1.10 | 0.25 | NM_022880.1  |  |
| 1700108L22Rik    | 524   | 1.10 | 0.15 | NM_145988.1  |  |
| LOC384282        | 50    | 1.10 | 0.38 | XM_357541.1  |  |
| Mus81            | 149   | 1.10 | 0.07 | NM_027877.2  |  |
| Mgrn1            | 3887  | 1.10 | 0.04 | NM_029657.2  |  |

|               |       |      |      |             |  |
|---------------|-------|------|------|-------------|--|
| 2610033H07Rik | 2110  | 1.10 | 0.09 | NM_029278.1 |  |
| Ap1m1         | 819   | 1.10 | 0.24 | NM_007456   |  |
| LOC386149     | 60    | 1.10 | 0.12 | XM_359094.1 |  |
| Rgs19         | 110   | 1.10 | 0.22 | NM_026446.2 |  |
| Cdc23         | 504   | 1.10 | 0.02 | NM_178347.2 |  |
| Mycbp         | 898   | 1.10 | 0.18 | NM_019660.1 |  |
| A630098G22Rik | 604   | 1.10 | 0.16 | AK080403    |  |
| 1500031H04Rik | 4610  | 1.10 | 0.02 | NM_025893.1 |  |
| 2010005O13Rik | 3839  | 1.10 | 0.05 | AK075812    |  |
| Vasp          | 107   | 1.10 | 0.45 | NM_009499.1 |  |
| Kcnq2         | 339   | 1.10 | 0.08 | XM_358348.1 |  |
| Ppapdc2       | 420   | 1.10 | 0.13 |             |  |
| Al480653      | 629   | 1.10 | 0.17 | NM_198626   |  |
| 5830461H18Rik | 216   | 1.10 | 0.17 | AK018024    |  |
| C330023M02Rik | 1635  | 1.10 | 0.14 | AK049325    |  |
| Slc2a3        | 224   | 1.10 | 0.09 | NM_011401.2 |  |
| Spec1         | 3600  | 1.10 | 0.20 | NM_172395.1 |  |
| 2410019G02Rik | 218   | 1.10 | 0.20 | XM_126427.5 |  |
| Lancl1        | 1572  | 1.10 | 0.25 | NM_021295.1 |  |
| 6330439P19Rik | 2315  | 1.10 | 0.14 | AK031886    |  |
| Erich1        | 1503  | 1.10 | 0.31 |             |  |
| Zfp472        | 508   | 1.10 | 0.19 | NM_153063   |  |
| Asb1          | 167   | 1.10 | 0.13 | XM_149066.3 |  |
| Dok5          | 76    | 1.10 | 0.21 | NM_029761.2 |  |
| Tk2           | 458   | 1.10 | 0.10 | NM_021028.2 |  |
| Spnr          | 61    | 1.10 | 0.26 | AK031315    |  |
| Cript         | 392   | 1.10 | 0.20 |             |  |
| Klhdc2        | 17807 | 1.10 | 0.12 | NM_027117.1 |  |
| Ppp2r4        | 124   | 1.10 | 0.14 | NM_138748   |  |
| 1500010J02Rik | 1584  | 1.10 | 0.15 | NM_026889.1 |  |
| Dio2          | 164   | 1.10 | 0.21 | NM_010050   |  |
| 1700001L05Rik | 37    | 1.10 | 0.41 |             |  |
| Lman2         | 1333  | 1.10 | 0.29 | NM_025828.2 |  |
| Hps1          | 431   | 1.10 | 0.23 | NM_019424.1 |  |
| 2810422B04Rik | 539   | 1.10 | 0.35 | NM_027275.2 |  |
| Ttc14         | 301   | 1.10 | 0.18 | NM_025978.2 |  |
| Lmcd1         | 241   | 1.10 | 0.20 | NM_144799.1 |  |
| LOC434864     | 660   | 1.10 | 0.25 |             |  |
| Pknox1        | 212   | 1.10 | 0.08 | NM_016670.2 |  |
| 1200013B22Rik | 649   | 1.10 | 0.02 | NM_028778.2 |  |
| Atpbd3        | 247   | 1.10 | 0.27 |             |  |
| A130096D14Rik | 48    | 1.10 | 0.22 | AK038333    |  |
| 1810043M20Rik | 130   | 1.10 | 0.05 | AK007762    |  |
| Camk2n1       | 746   | 1.10 | 0.31 |             |  |
| Klf5          | 801   | 1.10 | 0.13 | NM_009769.2 |  |
| Rnpep         | 1770  | 1.10 | 0.14 | NM_145417   |  |
| BC024868      | 152   | 1.10 | 0.39 | NM_199149   |  |
| LOC383026     | 34    | 1.10 | 0.42 | XM_356806.1 |  |
| Hspbap1       | 261   | 1.10 | 0.20 | NM_175111.2 |  |
| Nsd1          | 41    | 1.10 | 0.28 | NM_008739   |  |
| 2610019N19Rik | 104   | 1.10 | 0.24 |             |  |
| Faah          | 564   | 1.10 | 0.08 | AK004985    |  |
| Nfrkb         | 277   | 1.10 | 0.13 | NM_172766.2 |  |
| Aldh18a1      | 1434  | 1.10 | 0.29 |             |  |
| 1110031M08Rik | 208   | 1.10 | 0.08 | XM_355145   |  |
| Cdc7          | 825   | 1.10 | 0.25 | NM_009863.1 |  |
| Zdhhc8        | 5346  | 1.10 | 0.13 | XM_358776.1 |  |
| Amdhd2        | 166   | 1.09 | 0.16 |             |  |
| 4933428I03Rik | 137   | 1.09 | 0.01 | NM_025760   |  |
| Zc3hdc1       | 61    | 1.09 | 0.53 | NM_172893.1 |  |
| Zfp282        | 3589  | 1.09 | 0.04 | NM_146175.2 |  |
| Lman1         | 1589  | 1.09 | 0.08 | NM_027400.2 |  |
| Hdac1         | 1646  | 1.09 | 0.14 | NM_008228.1 |  |
| 2310039L15Rik | 33    | 1.09 | 0.30 | XM_290098.1 |  |
| Rad51ap1      | 299   | 1.09 | 0.21 | NM_009013.1 |  |
| Ctnnb1        | 1127  | 1.09 | 0.24 | NM_025680.2 |  |
| 4933412E12Rik | 973   | 1.09 | 0.12 |             |  |
| Dgkd          | 3399  | 1.09 | 0.08 |             |  |

|                  |       |      |      |              |  |
|------------------|-------|------|------|--------------|--|
| Zdhhc9           | 285   | 1.09 | 0.36 | NM_172465.1  |  |
| LOC230872        | 123   | 1.09 | 0.26 | NM_172122.1  |  |
| Gne              | 349   | 1.09 | 0.07 | NM_015828.2  |  |
| 1700027J05Rik    | 311   | 1.09 | 0.32 | NM_027081.1  |  |
| Rgs10            | 36    | 1.09 | 0.54 | NM_026418.1  |  |
| scl0002165.1_97  | 67    | 1.09 | 0.05 |              |  |
| LOC386508        | 42    | 1.09 | 0.30 | XM_359357.1  |  |
| Bat1a            | 3951  | 1.09 | 0.06 | NM_019693.2  |  |
| LOC383330        | 1236  | 1.09 | 0.14 | XM_356987.1  |  |
| Tceb3            | 1458  | 1.09 | 0.17 | NM_013736.2  |  |
| A630089D04Rik    | 98    | 1.09 | 0.19 | AK042402     |  |
| gi_6679936_ref_N | 34131 | 1.09 | 0.23 |              |  |
| Acsl5            | 4406  | 1.09 | 0.08 |              |  |
| Poldip3          | 3093  | 1.09 | 0.24 | NM_178627.1  |  |
| 28S_rRNA_X0052   | 97    | 1.09 | 0.08 |              |  |
| Grik2            | 53    | 1.09 | 0.37 | NM_010349.1  |  |
| E330031I04Rik    | 148   | 1.09 | 0.05 | AK054486     |  |
| 2410019A14Rik    | 170   | 1.09 | 0.20 | XM_131228.4  |  |
| Zfp113           | 80    | 1.09 | 0.33 | NM_019747    |  |
| 3110040D16Rik    | 459   | 1.09 | 0.23 | XM_126172    |  |
| Snai2            | 1333  | 1.09 | 0.16 | XM_147233.1  |  |
| 2610507B11Rik    | 730   | 1.09 | 0.18 | NM_001002004 |  |
| 2610206P12Rik    | 77    | 1.09 | 0.35 | AK011905     |  |
| AA407659         | 2248  | 1.09 | 0.12 | NM_175352.2  |  |
| Zkscan17         | 338   | 1.09 | 0.06 |              |  |
| lbsp             | 36    | 1.09 | 0.24 | NM_008318    |  |
| Cdk3             | 118   | 1.09 | 0.12 | NM_027165.1  |  |
| Fcrl3            | 333   | 1.09 | 0.28 | NM_144559.1  |  |
| Uap1             | 403   | 1.09 | 0.15 | NM_133806.2  |  |
| Ncstn            | 1587  | 1.09 | 0.27 | NM_021607.2  |  |
| Gmppa            | 2373  | 1.09 | 0.13 | NM_133708.1  |  |
| LOC434858        | 1873  | 1.09 | 0.09 |              |  |
| 6230410P16Rik    | 45    | 1.09 | 0.24 | NM_174846.3  |  |
| Tcf1             | 44    | 1.09 | 0.29 | NM_009327    |  |
| Tusc2            | 533   | 1.09 | 0.32 | NM_019742.2  |  |
| A830030H10Rik    | 355   | 1.09 | 0.32 | AK080627     |  |
| Wdr3             | 268   | 1.09 | 0.41 | NM_175552.3  |  |
| Supt6h           | 7653  | 1.09 | 0.05 | NM_009297    |  |
| 4631434O19Rik    | 172   | 1.09 | 0.30 | AK014543     |  |
| 2610007K22Rik    | 2309  | 1.09 | 0.04 | NM_152806.2  |  |
| Shroom3          | 370   | 1.09 | 0.14 |              |  |
| Olfir378         | 94    | 1.09 | 0.24 | NM_147024.1  |  |
| Aggf1            | 485   | 1.09 | 0.06 |              |  |
| Zfyve21          | 1604  | 1.09 | 0.19 | NM_026752.2  |  |
| Fdxr             | 229   | 1.09 | 0.05 | NM_007997.1  |  |
| BC037006         | 229   | 1.09 | 0.15 | XM_109956.4  |  |
| Ik               | 1537  | 1.09 | 0.10 | AK088908     |  |
| 6330583M11Rik    | 261   | 1.09 | 0.26 | NM_024465    |  |
| Ciptm1           | 2427  | 1.09 | 0.24 | NM_019649.1  |  |
| Gababrbp         | 643   | 1.09 | 0.19 | NM_178394.2  |  |
| Pitpnb           | 6414  | 1.09 | 0.18 | NM_019640.2  |  |
| Ppp2r5b          | 388   | 1.09 | 0.10 | NM_198168.1  |  |
| Pscd2            | 99    | 1.09 | 0.44 | NM_011181.2  |  |
| BC010250         | 626   | 1.09 | 0.21 | NM_178029.2  |  |
| Dfna5h           | 156   | 1.09 | 0.27 | AK089459     |  |
| 4930527B16Rik    | 94    | 1.09 | 0.20 | XM_147531.1  |  |
| Surf5            | 281   | 1.09 | 0.02 | NM_011513    |  |
| C530015C18       | 2026  | 1.09 | 0.35 | NM_177681.2  |  |
| Actl6a           | 879   | 1.09 | 0.11 | NM_019673.1  |  |
| Igtp             | 148   | 1.09 | 0.14 | NM_018738.2  |  |
| A230079E18Rik    | 305   | 1.09 | 0.19 | AK038962     |  |
| LOC386330        | 681   | 1.09 | 0.25 | XM_359173.1  |  |
| 5330438E18Rik    | 166   | 1.09 | 0.09 | NM_177282.2  |  |
| Megf11           | 1347  | 1.09 | 0.30 |              |  |
| 2400007A17Rik    | 98    | 1.09 | 0.14 | AK010293     |  |
| Arl6ip1          | 10619 | 1.09 | 0.17 | NM_019419.1  |  |
| 4930403O06Rik    | 759   | 1.09 | 0.30 | AK015068     |  |
| Fgd1             | 443   | 1.09 | 0.20 | NM_008001.2  |  |

|                 |       |      |      |              |  |
|-----------------|-------|------|------|--------------|--|
| Hey1            | 3182  | 1.09 | 0.26 | NM_010423.1  |  |
| Hmgn2           | 10029 | 1.09 | 0.16 | NM_016957.2  |  |
| Mtch2           | 2466  | 1.09 | 0.15 | NM_019758.2  |  |
| Kctd5           | 1670  | 1.09 | 0.27 | NM_027008.1  |  |
| Al413782        | 166   | 1.09 | 0.14 | NM_134044.2  |  |
| 2610510J17Rik   | 341   | 1.09 | 0.05 | NM_028131.1  |  |
| Tceal1          | 494   | 1.09 | 0.34 | NM_146236.1  |  |
| LOC227572       | 39    | 1.09 | 0.30 | XM_140812.3  |  |
| Pcmt1           | 1000  | 1.09 | 0.16 | NM_008786.1  |  |
| Gnl3            | 2869  | 1.09 | 0.15 |              |  |
| Dtx4            | 96    | 1.09 | 0.08 | NM_172442.2  |  |
| Ankrd40         | 234   | 1.09 | 0.06 |              |  |
| 1700030J22Rik   | 147   | 1.09 | 0.04 | XM_134467.4  |  |
| scl0001487.1_50 | 686   | 1.09 | 0.12 |              |  |
| LOC380844       | 36    | 1.09 | 0.71 | XM_358441.1  |  |
| Gna11           | 961   | 1.09 | 0.31 | NM_010301.1  |  |
| LOC332942       | 70    | 1.09 | 0.11 | XM_289292.2  |  |
| LOC382406       | 279   | 1.09 | 0.09 | XM_356488.1  |  |
| Rap2ip          | 1928  | 1.09 | 0.05 | NM_016759.1  |  |
| 4932439E07Rik   | 143   | 1.09 | 0.07 |              |  |
| Gak             | 6101  | 1.09 | 0.18 | BC065052     |  |
| Hibadh          | 7932  | 1.09 | 0.22 | NM_145567.1  |  |
| Pik4ca          | 4830  | 1.09 | 0.08 | NM_001001983 |  |
| En2             | 2623  | 1.09 | 0.04 | NM_010134.1  |  |
| Mipep           | 488   | 1.09 | 0.01 | NM_027436.1  |  |
| D230017B08Rik   | 66    | 1.09 | 0.74 | AK051900     |  |
| Tceb3bp1        | 180   | 1.09 | 0.44 | NM_025852    |  |
| BraDnm8         | 34    | 1.09 | 0.15 | L31395       |  |
| Dusp8           | 914   | 1.09 | 0.16 | NM_008748.1  |  |
| Senp3           | 3077  | 1.09 | 0.14 | NM_030702.2  |  |
| Tm4sf8          | 2279  | 1.09 | 0.15 | NM_019793.2  |  |
| Mx2             | 35    | 1.09 | 0.61 | NM_013606    |  |
| Rsad1           | 941   | 1.09 | 0.09 |              |  |
| Mglap           | 409   | 1.09 | 0.37 | NM_008597.2  |  |
| Slc22a9         | 126   | 1.09 | 0.32 | NM_019723.1  |  |
| Wwox            | 145   | 1.09 | 0.07 | AK046903     |  |
| Synv1           | 10985 | 1.09 | 0.09 | NM_028769.4  |  |
| 6620401K05Rik   | 122   | 1.09 | 0.08 | NM_172774.1  |  |
| LOC277860       | 239   | 1.09 | 0.08 | XM_203275.2  |  |
| 2700089E24Rik   | 189   | 1.09 | 0.07 | XM_355822    |  |
| Tcrg-V7         | 40    | 1.09 | 0.27 |              |  |
| LOC383215       | 36    | 1.09 | 0.09 | XM_356927.1  |  |
| Dusp10          | 244   | 1.09 | 0.57 | NM_022019.2  |  |
| Dhps            | 401   | 1.09 | 0.22 | NM_201408    |  |
| LOC269401       | 2342  | 1.09 | 0.10 | XM_194071.3  |  |
| B930066N23Rik   | 129   | 1.09 | 0.31 | AK047459     |  |
| Aurkb           | 1125  | 1.09 | 0.15 | XM_181344.3  |  |
| 2410002I01Rik   | 131   | 1.09 | 0.30 | NM_183137    |  |
| Kcng3           | 47    | 1.09 | 0.22 | NM_152923.1  |  |
| Egfl4           | 1489  | 1.09 | 0.23 | XM_194337    |  |
| Trim3           | 350   | 1.09 | 0.15 | NM_018880.1  |  |
| Spop            | 5896  | 1.09 | 0.02 | NM_025287    |  |
| Coasy           | 2578  | 1.09 | 0.08 | NM_027896.1  |  |
| Appbp1          | 1262  | 1.09 | 0.17 | NM_144931.1  |  |
| Cnot6           | 96    | 1.09 | 0.32 |              |  |
| Mxd4            | 131   | 1.09 | 0.21 | NM_010753.2  |  |
| D15Ertd735e     | 149   | 1.09 | 0.13 | NM_029098.2  |  |
| Arsa            | 723   | 1.09 | 0.10 | NM_009713    |  |
| scl0002657.1_5  | 113   | 1.09 | 0.51 |              |  |
| scl0001533.1_63 | 42    | 1.09 | 0.29 |              |  |
| Ccrn4l          | 834   | 1.09 | 0.11 | NM_009834.1  |  |
| 5133400J02Rik   | 33    | 1.09 | 0.21 | XM_488592    |  |
| Al851464        | 1338  | 1.09 | 0.21 | XM_130551.4  |  |
| 2600013N14Rik   | 919   | 1.09 | 0.42 | NM_152812.1  |  |
| C430002D13Rik   | 292   | 1.09 | 0.04 | AK049383     |  |
| 9630025G02Rik   | 60    | 1.09 | 0.33 | AK079328     |  |
| C630025L14      | 4425  | 1.09 | 0.22 | NM_172489.1  |  |
| Ecd             | 1178  | 1.09 | 0.20 |              |  |

|                 |       |      |      |             |  |
|-----------------|-------|------|------|-------------|--|
| D15Wsu75e       | 1139  | 1.09 | 0.14 | NM_134095.2 |  |
| Lmo4            | 2074  | 1.09 | 0.02 | NM_010723.2 |  |
| A230067E15Rik   | 121   | 1.09 | 0.17 | AK038836    |  |
| Tnip2           | 96    | 1.09 | 0.34 | NM_139064.1 |  |
| 2810410A08Rik   | 82    | 1.09 | 0.10 | XM_130324.4 |  |
| A730040I05Rik   | 37    | 1.09 | 0.17 | AK042925    |  |
| Dhx35           | 380   | 1.09 | 0.14 | NM_145742.1 |  |
| Sectm1          | 37    | 1.09 | 0.69 | NM_026907.2 |  |
| Lsm11           | 63    | 1.09 | 0.08 | NM_028185.1 |  |
| Slc6a17         | 590   | 1.09 | 0.14 | NM_172271.1 |  |
| Hsf4            | 187   | 1.09 | 0.49 | NM_011939.1 |  |
| LOC331583       | 167   | 1.09 | 0.26 | XM_284761.2 |  |
| Extl2           | 2546  | 1.09 | 0.17 | NM_021388.2 |  |
| Rab5c           | 3940  | 1.09 | 0.19 | NM_024456   |  |
| Exoc7           | 771   | 1.09 | 0.17 | NM_016857   |  |
| Rab9            | 326   | 1.09 | 0.23 | NM_019773.1 |  |
| Cnp1            | 131   | 1.09 | 0.23 | NM_009923.1 |  |
| scl0002864.1_26 | 111   | 1.09 | 0.13 |             |  |
| Sca2            | 2877  | 1.09 | 0.27 | NM_009125.1 |  |
| Mgll            | 53    | 1.09 | 0.07 | NM_011844.3 |  |
| Ncl             | 1037  | 1.09 | 0.14 | NM_010880.2 |  |
| 3000004C01Rik   | 921   | 1.09 | 0.19 | NM_197959.1 |  |
| Sf3a1           | 2555  | 1.09 | 0.33 | NM_026175.3 |  |
| mt-Nd1          | 28558 | 1.09 | 0.09 |             |  |
| 1700034M11Rik   | 43    | 1.09 | 0.41 |             |  |
| Gmip            | 544   | 1.09 | 0.27 | NM_198101.1 |  |
| 5730547N13Rik   | 403   | 1.08 | 0.12 | XM_130529.2 |  |
| Nradd           | 79    | 1.08 | 0.36 | NM_026012.1 |  |
| A530079D03Rik   | 44    | 1.08 | 0.07 | AK041069    |  |
| Shhs            | 39    | 1.08 | 0.18 | XM_489124   |  |
| Lin28           | 80    | 1.08 | 0.17 | NM_145833.1 |  |
| Prps1           | 7541  | 1.08 | 0.08 | NM_021463.2 |  |
| BC026432        | 63    | 1.08 | 0.45 | NM_146202.1 |  |
| C630013N10Rik   | 527   | 1.08 | 0.20 | BC023909    |  |
| Catnal1         | 691   | 1.08 | 0.32 | AK034393    |  |
| Dnajb12         | 756   | 1.08 | 0.27 | NM_019965   |  |
| 1700082G03Rik   | 58    | 1.08 | 0.08 | AK006979    |  |
| ORF5            | 113   | 1.08 | 0.19 | NM_016924.1 |  |
| 2310038D14Rik   | 101   | 1.08 | 0.33 |             |  |
| Gas8            | 691   | 1.08 | 0.15 | NM_018855.1 |  |
| Calu            | 1066  | 1.08 | 0.16 | NM_007594   |  |
| Hspa8           | 27757 | 1.08 | 0.06 | NM_031165   |  |
| Tex9            | 716   | 1.08 | 0.24 | NM_009359.1 |  |
| Kif5b           | 45    | 1.08 | 0.18 | NM_008448.1 |  |
| Sox9            | 889   | 1.08 | 0.20 | NM_011448   |  |
| Prim1           | 95    | 1.08 | 0.13 | NM_008921.1 |  |
| Btla            | 57    | 1.08 | 0.27 | NM_177584.2 |  |
| A430023D23Rik   | 206   | 1.08 | 0.42 | AK039868    |  |
| Ggtl3           | 774   | 1.08 | 0.26 | NM_144786.1 |  |
| Rg9mtd1         | 1649  | 1.08 | 0.31 | NM_029092.1 |  |
| Efna5           | 2801  | 1.08 | 0.05 | NM_207654.1 |  |
| LOC385653       | 89    | 1.08 | 0.25 | XM_358848.1 |  |
| D19Ert703e      | 897   | 1.08 | 0.11 | NM_029456.1 |  |
| LOC386567       | 36    | 1.08 | 0.61 | XM_359408.1 |  |
| Pdk3            | 918   | 1.08 | 0.13 | NM_145630.1 |  |
| Alox5ap         | 39    | 1.08 | 0.18 | NM_009663   |  |
| Stard3          | 303   | 1.08 | 0.13 | NM_021547   |  |
| Ppp5c           | 1218  | 1.08 | 0.01 | NM_011155.1 |  |
| Pep4            | 205   | 1.08 | 0.04 | NM_008820.1 |  |
| Olf259          | 33    | 1.08 | 0.63 | NM_146770.1 |  |
| C730042F17Rik   | 35    | 1.08 | 0.68 | NM_145517.2 |  |
| 39694           | 244   | 1.08 | 0.39 |             |  |
| Tmem63a         | 637   | 1.08 | 0.25 |             |  |
| 2010309J24Rik   | 175   | 1.08 | 0.16 | AK008554    |  |
| 3732413I11Rik   | 1013  | 1.08 | 0.23 | XM_203376.1 |  |
| 1110020P09Rik   | 133   | 1.08 | 0.16 |             |  |
| Nck2            | 2267  | 1.08 | 0.15 | NM_010879.2 |  |
| E430034L04Rik   | 2844  | 1.08 | 0.16 | NM_011816.2 |  |

|               |       |      |      |             |  |
|---------------|-------|------|------|-------------|--|
| Wdr75         | 7915  | 1.08 | 0.20 |             |  |
| Gale          | 1067  | 1.08 | 0.17 | NM_178389.2 |  |
| Anapc5        | 4475  | 1.08 | 0.16 | NM_021505.1 |  |
| 2810442O16Rik | 1409  | 1.08 | 0.09 | NM_024196   |  |
| Necap1        | 1964  | 1.08 | 0.07 |             |  |
| 2410030J07Rik | 147   | 1.08 | 0.04 | NM_144527.2 |  |
| Ppil2         | 386   | 1.08 | 0.16 | NM_144954   |  |
| 2700044H17Rik | 81    | 1.08 | 0.26 | AK012372    |  |
| Rqcd1         | 933   | 1.08 | 0.03 | NM_021383.3 |  |
| BC023957      | 896   | 1.08 | 0.20 | NM_172257.1 |  |
| Rpap1         | 294   | 1.08 | 0.09 | NM_177294.3 |  |
| 4932411N02Rik | 218   | 1.08 | 0.33 | AK029975    |  |
| 9630058J23Rik | 1584  | 1.08 | 0.18 | NM_146105.3 |  |
| Pde4dip       | 499   | 1.08 | 0.23 |             |  |
| Stim1         | 310   | 1.08 | 0.24 | AK031003    |  |
| Ttc7          | 201   | 1.08 | 0.07 | NM_028639   |  |
| Mcm4          | 5884  | 1.08 | 0.19 | NM_008565.2 |  |
| Commd8        | 229   | 1.08 | 0.10 | NM_178599.2 |  |
| 9830169E20Rik | 1981  | 1.08 | 0.15 | AK036745    |  |
| Pik3cb        | 642   | 1.08 | 0.21 | NM_029094.1 |  |
| Mlxipl        | 486   | 1.08 | 0.17 |             |  |
| Ttc8          | 715   | 1.08 | 0.09 | NM_198311.1 |  |
| Chrb2         | 241   | 1.08 | 0.14 | NM_009602.3 |  |
| A730005H01Rik | 56    | 1.08 | 0.15 | AK042558    |  |
| Eral1         | 387   | 1.08 | 0.12 | AK018664    |  |
| Adck5         | 468   | 1.08 | 0.43 | NM_172960.1 |  |
| LOC380642     | 99    | 1.08 | 0.08 | XM_354547.1 |  |
| Usp12         | 156   | 1.08 | 0.15 | NM_011669.2 |  |
| Gpt1          | 193   | 1.08 | 0.22 | NM_182805.1 |  |
| Abcd1         | 196   | 1.08 | 0.19 | NM_007435.1 |  |
| Cxxc1         | 2353  | 1.08 | 0.08 | NM_028868.1 |  |
| Dpysl4        | 72    | 1.08 | 0.37 | NM_011993.2 |  |
| Prpf3         | 827   | 1.08 | 0.09 | NM_027541.2 |  |
| MGC6357       | 366   | 1.08 | 0.28 | NM_144791.1 |  |
| Sbsn          | 34    | 1.08 | 0.73 | NM_172205.1 |  |
| 2310016K04Rik | 50    | 1.08 | 0.23 | XM_134309.1 |  |
| Ehmt1         | 390   | 1.08 | 0.21 | NM_172545.1 |  |
| Prpf4         | 516   | 1.08 | 0.15 | XM_131444.4 |  |
| Stx18         | 583   | 1.08 | 0.19 | NM_026959.1 |  |
| 1200016B10Rik | 442   | 1.08 | 0.34 | NM_025819.2 |  |
| 4930402I24Rik | 2004  | 1.08 | 0.07 | AK076652    |  |
| Tcn2          | 47    | 1.08 | 0.58 | NM_015749.1 |  |
| AV340375      | 1689  | 1.08 | 0.14 | NM_172519.1 |  |
| 2010309E21Rik | 334   | 1.08 | 0.07 | NM_025591.2 |  |
| Tcte1l        | 4043  | 1.08 | 0.16 | NM_025975.3 |  |
| 4833426J09Rik | 549   | 1.08 | 0.18 |             |  |
| C530028I08Rik | 235   | 1.08 | 0.18 | AK082980    |  |
| Dhx34         | 311   | 1.08 | 0.03 | NM_027883.1 |  |
| Rsb30         | 45    | 1.08 | 0.51 | NM_029494.2 |  |
| Abhd2         | 199   | 1.08 | 0.09 | NM_018811.4 |  |
| Vezf1         | 2600  | 1.08 | 0.10 | NM_016686.2 |  |
| Pdss1         | 205   | 1.08 | 0.15 |             |  |
| Ccdc111       | 656   | 1.08 | 0.49 |             |  |
| Ppa2          | 343   | 1.08 | 0.11 |             |  |
| Npc1          | 455   | 1.08 | 0.10 | NM_008720.1 |  |
| B130045P17Rik | 206   | 1.08 | 0.13 | AK080782    |  |
| 3110001K24Rik | 60    | 1.08 | 0.05 | XM_127674.4 |  |
| Pik3r3        | 987   | 1.08 | 0.31 | NM_181585   |  |
| Cyld          | 792   | 1.08 | 0.17 | NM_173369   |  |
| Eps8l2        | 587   | 1.08 | 0.32 | NM_133191.2 |  |
| Cct8          | 11369 | 1.08 | 0.14 | NM_009840.2 |  |
| Ets2          | 10930 | 1.08 | 0.08 | NM_011809.2 |  |
| D030026J11Rik | 36    | 1.08 | 0.87 | AK050856    |  |
| Sfrs10        | 1504  | 1.08 | 0.24 | NM_009186.2 |  |
| Nfil3         | 3539  | 1.08 | 0.10 | NM_017373.2 |  |
| A430108B07Rik | 198   | 1.08 | 0.12 | XM_486491   |  |
| 6820424L24Rik | 658   | 1.08 | 0.04 | XM_144310   |  |
| Prss15        | 3602  | 1.08 | 0.18 | XM_128721.2 |  |

|               |       |      |      |             |  |
|---------------|-------|------|------|-------------|--|
| 2700008B19Rik | 34    | 1.08 | 0.38 | XM_354634.1 |  |
| Hsd17b1       | 285   | 1.08 | 0.28 | NM_010475.1 |  |
| 2610009O05Rik | 306   | 1.08 | 0.15 | AK011367    |  |
| XEDAR EDA-A2R | 63    | 1.08 | 0.47 |             |  |
| Plekhm1       | 298   | 1.08 | 0.29 | NM_183034.1 |  |
| A930024F09Rik | 33    | 1.08 | 0.34 | AK080730    |  |
| Sycp1         | 43    | 1.08 | 0.10 | XM_355414.1 |  |
| Atp6v0e2      | 903   | 1.08 | 0.10 |             |  |
| Atf4          | 7345  | 1.08 | 0.13 | NM_009716   |  |
| C330006K01Rik | 339   | 1.08 | 0.09 | NM_172725.1 |  |
| Cadm2         | 36    | 1.08 | 0.55 |             |  |
| Spnb4         | 66    | 1.08 | 0.19 | NM_032610.1 |  |
| Zmynd10       | 60    | 1.08 | 0.32 | NM_053253.2 |  |
| B230381E03Rik | 70    | 1.08 | 0.19 | AK046413    |  |
| LOC384972     | 45    | 1.08 | 0.27 | XM_357967.1 |  |
| Prnp          | 11646 | 1.08 | 0.09 | NM_011170.1 |  |
| Flna          | 184   | 1.08 | 0.11 | XM_289920.2 |  |
| Zfp109        | 48    | 1.08 | 0.09 | NM_020262.1 |  |
| LOC208055     | 2827  | 1.08 | 0.21 | XM_144188.2 |  |
| Foxp4         | 43    | 1.08 | 0.24 | NM_028767.1 |  |
| Tex19         | 195   | 1.08 | 0.24 | NM_028602.2 |  |
| LOC227109     | 45    | 1.08 | 0.49 | XM_129858.2 |  |
| LOC231423     | 42    | 1.08 | 0.44 | XM_132160.3 |  |
| 5730599I05Rik | 946   | 1.08 | 0.07 | NM_198019.1 |  |
| 2810037C14Rik | 1213  | 1.08 | 0.17 | NM_026034.1 |  |
| LOC234187     | 83    | 1.08 | 0.23 | XM_146287.3 |  |
| Polg2         | 151   | 1.08 | 0.07 | NM_015810   |  |
| 4931406I20Rik | 113   | 1.08 | 0.17 | NM_025739.2 |  |
| Smg7          | 2652  | 1.08 | 0.21 |             |  |
| 2400010G15Rik | 228   | 1.08 | 0.33 | NM_029624.2 |  |
| LOC382084     | 83    | 1.08 | 0.30 | XM_356165.1 |  |
| Tcf19         | 1798  | 1.08 | 0.19 | NM_025674.1 |  |
| 2310066E14Rik | 124   | 1.08 | 0.31 | NM_029386.2 |  |
| HPBR11-4      | 103   | 1.08 | 0.26 | AK048615    |  |
| Gata2         | 539   | 1.08 | 0.38 | NM_008090.3 |  |
| 0610009I22Rik | 795   | 1.08 | 0.15 | NM_025646.2 |  |
| 2310010I15Rik | 2510  | 1.08 | 0.17 | AK009272    |  |
| Gstm6         | 75    | 1.08 | 0.16 | NM_008184.1 |  |
| Hspd1         | 11158 | 1.08 | 0.04 | NM_010477.2 |  |
| Dazap2        | 5270  | 1.08 | 0.05 | NM_011873.2 |  |
| 2010309L07Rik | 2966  | 1.08 | 0.14 |             |  |
| Spred1        | 236   | 1.08 | 0.34 | NM_033524.1 |  |
| Pcdhga4       | 54    | 1.08 | 0.71 | NM_033587.2 |  |
| D030015G18Rik | 443   | 1.08 | 0.30 | NM_146155.2 |  |
| BC031853      | 258   | 1.08 | 0.58 | NM_172758.1 |  |
| Mfng          | 1315  | 1.08 | 0.04 | NM_008595.1 |  |
| LOC381135     | 43    | 1.08 | 0.43 | XM_355052.1 |  |
| E2f2          | 1509  | 1.08 | 0.10 | NM_183301.1 |  |
| Hgfac         | 406   | 1.08 | 0.06 | NM_019447.1 |  |
| Wbp4          | 720   | 1.08 | 0.11 | NM_018765.1 |  |
| Ppp2cb        | 6438  | 1.08 | 0.23 | NM_017374.2 |  |
| Dnajb1        | 4155  | 1.08 | 0.12 | NM_018808.1 |  |
| 9030607L17Rik | 234   | 1.08 | 0.14 | NM_027829.1 |  |
| Ldh1          | 33355 | 1.08 | 0.16 | NM_010699.1 |  |
| Cd2bp2        | 506   | 1.08 | 0.41 | NM_027353.2 |  |
| 1300018I17Rik | 38    | 1.08 | 0.43 | XM_134461   |  |
| Gbf1          | 1116  | 1.08 | 0.31 | NM_178930   |  |
| Usf2          | 151   | 1.08 | 0.07 | NM_011680.1 |  |
| Zfp289        | 673   | 1.08 | 0.00 | NM_023854   |  |
| Copz1         | 1552  | 1.08 | 0.12 | AK079205    |  |
| LOC381539     | 56    | 1.08 | 0.13 | XM_355508.1 |  |
| Foxj1         | 70    | 1.08 | 0.20 | NM_008240.1 |  |
| Txn12         | 375   | 1.08 | 0.15 | NM_023140.3 |  |
| LOC383100     | 52    | 1.08 | 0.71 | XM_356874.1 |  |
| Apg12l        | 2355  | 1.08 | 0.04 | NM_026217.1 |  |
| Sf3b3         | 2646  | 1.08 | 0.09 | NM_133953.1 |  |
| Rheb          | 1449  | 1.08 | 0.33 | NM_053075   |  |
| 2810481F14Rik | 97    | 1.08 | 0.19 | NM_028354   |  |

|               |      |      |      |             |  |
|---------------|------|------|------|-------------|--|
| Mef2b         | 44   | 1.08 | 0.22 | NM_008578.1 |  |
| LOC234155     | 32   | 1.08 | 0.47 | XM_134120.2 |  |
| Mamdc2        | 65   | 1.08 | 0.55 | NM_174857.1 |  |
| Pnma2         | 677  | 1.08 | 0.26 | NM_175498.3 |  |
| Egln3         | 33   | 1.08 | 0.32 | NM_028133.1 |  |
| Ate1          | 986  | 1.08 | 0.29 | BC050948    |  |
| A430090G16Rik | 73   | 1.08 | 0.24 | AK040384    |  |
| BC023181      | 308  | 1.08 | 0.37 | XM_194180.3 |  |
| Slc25a4       | 33   | 1.08 | 0.67 | XM_134169.4 |  |
| Shroom2       | 1068 | 1.08 | 0.20 |             |  |
| Pik3r2        | 491  | 1.08 | 0.22 | NM_008841.1 |  |
| A130075K23Rik | 190  | 1.08 | 0.36 | AK038067    |  |
| 2610206B13Rik | 408  | 1.08 | 0.14 | NM_026047.3 |  |
| 1110017D15Rik | 419  | 1.08 | 0.10 | XM_355478.1 |  |
| BC026370      | 599  | 1.08 | 0.15 | NM_198167.1 |  |
| Olf437        | 44   | 1.08 | 0.30 | NM_146296.1 |  |
| Rabl2a        | 536  | 1.08 | 0.09 | NM_026817.1 |  |
| Pacsin2       | 131  | 1.08 | 0.17 | NM_011862   |  |
| Bcat1         | 963  | 1.08 | 0.09 | NM_007532.1 |  |
| LOC383071     | 41   | 1.08 | 0.27 | XM_356840.1 |  |
| Olf983        | 46   | 1.08 | 0.16 | NM_146827   |  |
| Vps54         | 3489 | 1.07 | 0.16 | NM_139061.2 |  |
| 5930424F13Rik | 112  | 1.07 | 0.18 | AK031181    |  |
| Mfn1          | 1203 | 1.07 | 0.18 | NM_024200.2 |  |
| Il23a         | 42   | 1.07 | 0.23 | NM_031252.1 |  |
| Kelch1        | 448  | 1.07 | 0.07 | XM_148134.1 |  |
| Mapk8         | 177  | 1.07 | 0.31 | NM_016700   |  |
| Stat6         | 116  | 1.07 | 0.09 | NM_009284.1 |  |
| Stip1         | 8451 | 1.07 | 0.09 | NM_016737.1 |  |
| 0610009M14Rik | 409  | 1.07 | 0.39 | NM_023910.4 |  |
| Camk2g        | 158  | 1.07 | 0.35 | NM_178597.2 |  |
| Tcea2         | 853  | 1.07 | 0.10 | NM_009326   |  |
| Cndp2         | 81   | 1.07 | 0.24 | NM_023149.2 |  |
| 2900078C09Rik | 1103 | 1.07 | 0.14 |             |  |
| LOC382182     | 286  | 1.07 | 0.44 | XM_356285.1 |  |
| BC021790      | 240  | 1.07 | 0.18 | NM_144824.1 |  |
| Dusp16        | 512  | 1.07 | 0.14 | NM_130447.1 |  |
| Eif5          | 7297 | 1.07 | 0.16 | NM_173363.2 |  |
| LOC384083     | 66   | 1.07 | 0.23 | XM_357409.1 |  |
| 4931419P11Rik | 82   | 1.07 | 0.34 | NM_207268.1 |  |
| ORF18         | 3279 | 1.07 | 0.12 | NM_029565.2 |  |
| Krba1         | 674  | 1.07 | 0.09 |             |  |
| Ppm1k         | 335  | 1.07 | 0.16 |             |  |
| Med19         | 686  | 1.07 | 0.28 |             |  |
| Srpk1         | 3398 | 1.07 | 0.01 | NM_016795.2 |  |
| Usp48         | 393  | 1.07 | 0.13 | NM_028344.1 |  |
| LOC385877     | 528  | 1.07 | 0.14 | XM_358981.1 |  |
| Atp6ap2       | 8096 | 1.07 | 0.06 | NM_027439   |  |
| Al604832      | 806  | 1.07 | 0.08 | NM_133979.1 |  |
| Nudt9         | 350  | 1.07 | 0.21 | NM_028794.2 |  |
| C630013B14Rik | 969  | 1.07 | 0.24 | AK049936    |  |
| Eif2b5        | 3646 | 1.07 | 0.06 | NM_172265.1 |  |
| 2310069P03Rik | 358  | 1.07 | 0.22 | NM_028002.1 |  |
| Phf3          | 3402 | 1.07 | 0.06 | XM_129836   |  |
| Adprt12       | 1261 | 1.07 | 0.09 | NM_009632.2 |  |
| Abhd1         | 151  | 1.07 | 0.26 | NM_021304.2 |  |
| Dido1         | 312  | 1.07 | 0.11 | NM_011805   |  |
| Tnfrsf10b     | 192  | 1.07 | 0.19 | NM_020275.3 |  |
| D230041D01Rik | 42   | 1.07 | 0.11 | AK052067    |  |
| LOC384384     | 65   | 1.07 | 0.11 | XM_357614.1 |  |
| 6430601A21Rik | 390  | 1.07 | 0.08 | NM_175466.2 |  |
| Sult1d1       | 36   | 1.07 | 0.27 | NM_016771.2 |  |
| Hk1           | 563  | 1.07 | 0.47 | NM_010438.1 |  |
| Hcngp         | 306  | 1.07 | 0.09 | NM_020483.2 |  |
| Dlgap3        | 62   | 1.07 | 0.07 | NM_198618.1 |  |
| 9430006C24Rik | 1560 | 1.07 | 0.13 | AK034557    |  |
| D10Ert516e    | 1034 | 1.07 | 0.04 | XM_125901   |  |
| LOC382558     | 33   | 1.07 | 0.44 | XM_356569.1 |  |



|               |      |      |      |             |  |
|---------------|------|------|------|-------------|--|
| D830014E11Rik | 52   | 1.07 | 0.11 | NM_177251.2 |  |
| 2810046L04Rik | 448  | 1.07 | 0.29 | AK012908    |  |
| Slc35b3       | 997  | 1.07 | 0.10 | NM_134060.2 |  |
| Pcdha1        | 772  | 1.07 | 0.10 | NM_054072.1 |  |
| Hs2st1        | 805  | 1.07 | 0.08 | NM_011828   |  |
| LOC381259     | 1226 | 1.07 | 0.28 | XM_355201.1 |  |
| 2310010B21Rik | 461  | 1.07 | 0.16 | NM_027123.2 |  |
| 3010027A04Rik | 557  | 1.07 | 0.21 | XM_134514.2 |  |
| Fkbp5         | 935  | 1.07 | 0.19 | NM_010220.2 |  |
| D7Ert462e     | 124  | 1.07 | 0.29 | NM_028771.1 |  |
| C130021C16Rik | 62   | 1.07 | 0.18 | AK081492    |  |
| A730098N08Rik | 65   | 1.07 | 0.29 | AK043473    |  |
| 1110018J23Rik | 1119 | 1.07 | 0.13 | XM_140742.4 |  |
| Bin1          | 722  | 1.07 | 0.18 | NM_009668   |  |
| Stxbp2        | 4605 | 1.07 | 0.12 | NM_011503.2 |  |
| Tpx2          | 654  | 1.07 | 0.21 | NM_028109.2 |  |
| A230078I05Rik | 774  | 1.07 | 0.24 |             |  |
| Sec22l3       | 254  | 1.07 | 0.19 | NM_178677.2 |  |
| Pkmyt1        | 102  | 1.07 | 0.07 |             |  |
| Gphb5         | 57   | 1.07 | 0.16 | NM_175644.1 |  |
| Slc22a18      | 86   | 1.07 | 0.15 | NM_008767   |  |
| Nasp          | 2482 | 1.07 | 0.04 | NM_016777.2 |  |
| Atp6v1d       | 3271 | 1.07 | 0.36 | NM_023721.1 |  |
| Tuba3         | 90   | 1.07 | 0.16 | NM_009446.1 |  |
| Slc25a1       | 938  | 1.07 | 0.22 | NM_153150.1 |  |
| 4922503N01Rik | 1124 | 1.07 | 0.16 | NM_153392.1 |  |
| 2310075A12Rik | 645  | 1.07 | 0.06 | NM_178027.3 |  |
| Mars          | 942  | 1.07 | 0.10 |             |  |
| Nras          | 1455 | 1.07 | 0.03 | NM_010937.1 |  |
| Gas2l1        | 65   | 1.07 | 0.46 | NM_144560.1 |  |
| 9530064J02    | 3532 | 1.07 | 0.15 | XM_489200   |  |
| Itgb2         | 52   | 1.07 | 0.25 | NM_008404.1 |  |
| Mllt3         | 320  | 1.07 | 0.11 | NM_027326.2 |  |
| Map2k3        | 3338 | 1.07 | 0.19 | NM_008928.1 |  |
| Ppp6c         | 3259 | 1.07 | 0.14 | NM_024209.1 |  |
| E330016A09Rik | 3192 | 1.07 | 0.16 | AK054329    |  |
| Cdc5l         | 1608 | 1.07 | 0.10 | NM_152810.1 |  |
| Lsm14b        | 195  | 1.07 | 0.14 |             |  |
| 2010305B15Rik | 110  | 1.07 | 0.52 |             |  |
| Hig1          | 314  | 1.07 | 0.23 | NM_019814.2 |  |
| Abcb8         | 369  | 1.07 | 0.15 |             |  |
| 1110002L01Rik | 61   | 1.07 | 0.09 | XM_484105   |  |
| 3230401D17Rik | 869  | 1.07 | 0.13 | NM_025699.2 |  |
| Cldn15        | 40   | 1.07 | 0.12 | NM_021719.1 |  |
| 2500003M10Rik | 3556 | 1.07 | 0.23 | NM_023215   |  |
| G630058F05Rik | 57   | 1.07 | 0.52 | AK090349    |  |
| Usf1          | 147  | 1.07 | 0.19 | NM_009480.1 |  |
| 2410016F01Rik | 6451 | 1.07 | 0.23 | NM_022423.1 |  |
| mKIAA0282     | 956  | 1.07 | 0.02 | AK129109    |  |
| A230046K03Rik | 1805 | 1.07 | 0.07 | XM_193573.3 |  |
| Ddr1          | 419  | 1.07 | 0.13 | NM_007584.1 |  |
| 1110015K06Rik | 3286 | 1.07 | 0.04 | NM_026748.1 |  |
| Olf66         | 74   | 1.07 | 0.12 | NM_013618.2 |  |
| Dmwd          | 1487 | 1.07 | 0.05 | NM_010058.1 |  |
| Fath          | 1502 | 1.07 | 0.19 | XM_134149.5 |  |
| Lactb         | 427  | 1.07 | 0.06 | NM_030717.1 |  |
| 2900006K08Rik | 152  | 1.07 | 0.05 |             |  |
| Tnrc6c        | 1284 | 1.07 | 0.18 |             |  |
| LOC383942     | 1218 | 1.07 | 0.12 | XM_357338.1 |  |
| E430003H02Rik | 64   | 1.07 | 0.30 | AK088077    |  |
| C130073D16Rik | 56   | 1.07 | 0.35 | NM_175557.2 |  |
| 2610301G19Rik | 447  | 1.07 | 0.13 | BC021475    |  |
| Sar1a         | 2648 | 1.07 | 0.10 |             |  |
| Gzmn          | 41   | 1.07 | 0.57 | NM_153052.1 |  |
| Gtf3c2        | 1897 | 1.07 | 0.03 | NM_027901.1 |  |
| Mobkl2c       | 39   | 1.07 | 0.22 | NM_175308.2 |  |
| 4930553C05Rik | 375  | 1.07 | 0.19 | AK016099    |  |
| BC003331      | 337  | 1.07 | 0.07 | NM_145511.1 |  |

|                  |       |      |      |             |  |
|------------------|-------|------|------|-------------|--|
| Itch             | 252   | 1.07 | 0.10 | AK035725    |  |
| Trim32           | 2777  | 1.07 | 0.04 | NM_053084.1 |  |
| Srebp2           | 570   | 1.07 | 0.20 | XM_127995.4 |  |
| Eno2             | 4057  | 1.07 | 0.01 | NM_013509.2 |  |
| 4930535B03Rik    | 73    | 1.07 | 0.12 | XM_485279   |  |
| scl0002617.1_582 | 1616  | 1.07 | 0.21 |             |  |
| B230339M05Rik    | 1349  | 1.07 | 0.14 | XM_283803   |  |
| A130070G01Rik    | 583   | 1.07 | 0.18 | AK037997    |  |
| ZBTB45           | 276   | 1.07 | 0.51 |             |  |
| Dlg5             | 873   | 1.07 | 0.17 | XM_127605.4 |  |
| Frat2            | 297   | 1.07 | 0.14 | NM_177603.1 |  |
| Vapa             | 1749  | 1.07 | 0.33 | NM_013933.2 |  |
| Hspa9            | 20431 | 1.07 | 0.05 |             |  |
| 9130229H14Rik    | 288   | 1.07 | 0.11 | XM_135706.3 |  |
| 5730509K17Rik    | 206   | 1.07 | 0.07 | NM_172274.1 |  |
| 4833421E05Rik    | 148   | 1.07 | 0.08 | NM_026347   |  |
| Zfp307           | 207   | 1.07 | 0.45 | NM_023685.2 |  |
| A830039B04Rik    | 523   | 1.07 | 0.03 | NM_177045.2 |  |
| Pex2             | 1414  | 1.07 | 0.22 | NM_021483.1 |  |
| Cbx7             | 159   | 1.07 | 0.42 | NM_144811.2 |  |
| 6720460F02Rik    | 117   | 1.07 | 0.19 | NM_144526.2 |  |
| Lrrc1            | 133   | 1.07 | 0.18 | NM_172528.2 |  |
| Epb4.111         | 255   | 1.07 | 0.15 | NM_013510.1 |  |
| Slc30a1          | 232   | 1.07 | 0.19 | NM_009579.2 |  |
| LOC244421        | 271   | 1.07 | 0.17 | XM_146279.3 |  |
| 4933416I08Rik    | 38    | 1.07 | 0.11 | XM_204338.1 |  |
| BC014795         | 995   | 1.07 | 0.20 | NM_144794   |  |
| BC045600         | 78    | 1.07 | 0.21 | NM_198647.1 |  |
| D030022P06Rik    | 216   | 1.07 | 0.33 | XM_489207   |  |
| Ejp3             | 894   | 1.07 | 0.14 | NM_028811.1 |  |
| C78212           | 2413  | 1.07 | 0.31 | NM_198176.1 |  |
| Hnrpk            | 1237  | 1.07 | 0.31 | AK028023    |  |
| 1110003A17Rik    | 721   | 1.07 | 0.12 | XM_358661.1 |  |
| LOC384906        | 35    | 1.07 | 0.40 | XM_357934.1 |  |
| AW046014         | 66    | 1.07 | 0.36 | NM_174989   |  |
| 1700113O17Rik    | 55    | 1.07 | 0.30 | NM_026627.1 |  |
| Kifc1            | 215   | 1.07 | 0.23 | NM_016761.1 |  |
| G630008F16Rik    | 63    | 1.07 | 0.28 | AK090163    |  |
| C230093N12Rik    | 1472  | 1.07 | 0.08 | NM_153560.2 |  |
| Taf7l            | 103   | 1.07 | 0.60 | NM_028958.2 |  |
| 4933407C03Rik    | 644   | 1.07 | 0.16 | XM_356109.1 |  |
| scl000911.1_939  | 1626  | 1.07 | 0.18 |             |  |
| Polm             | 68    | 1.07 | 0.25 | NM_017401.1 |  |
| Fzd3             | 113   | 1.07 | 0.12 | NM_021458   |  |
| Armcc9           | 232   | 1.07 | 0.14 |             |  |
| Dp11l            | 1963  | 1.07 | 0.19 | NM_139292.1 |  |
| Slc9a7           | 154   | 1.07 | 0.40 | NM_177353.2 |  |
| Centg3           | 349   | 1.07 | 0.04 | NM_139153.1 |  |
| Vamp2            | 957   | 1.07 | 0.10 | NM_009497.2 |  |
| 1200006G13Rik    | 2493  | 1.07 | 0.09 | AK004611    |  |
| AA407930         | 4879  | 1.07 | 0.05 | NM_133349.2 |  |
| B230369F24Rik    | 45    | 1.07 | 0.64 | XM_484944   |  |
| 2410127E16Rik    | 204   | 1.07 | 0.36 | XM_485929   |  |
| Slc22a5          | 326   | 1.07 | 0.05 | NM_011396.2 |  |
| Dus3l            | 184   | 1.07 | 0.09 |             |  |
| Morf4l1          | 1912  | 1.07 | 0.20 | NM_024431   |  |
| 9626100_224      | 23392 | 1.07 | 0.22 |             |  |
| Rit2             | 730   | 1.07 | 0.09 | NM_009065   |  |
| Pmpcb            | 967   | 1.07 | 0.02 | XM_131914.3 |  |
| 4930447F20Rik    | 498   | 1.07 | 0.10 | AK015403    |  |
| 0610009O04Rik    | 54    | 1.07 | 0.64 | AK002431    |  |
| Uros             | 516   | 1.07 | 0.16 | AK002971    |  |
| A130024C22Rik    | 34    | 1.07 | 0.46 | AK037532    |  |
| Uvrag1           | 1623  | 1.07 | 0.29 | NM_178635.2 |  |
| LOC382421        | 55    | 1.07 | 0.21 | XM_356497.1 |  |
| Zfp330           | 2626  | 1.07 | 0.07 | NM_145600.1 |  |
| LOC237081        | 3413  | 1.07 | 0.09 | XM_136080.2 |  |
| 4930573I19Rik    | 292   | 1.07 | 0.23 | XM_127142.5 |  |

|                  |      |      |      |             |  |
|------------------|------|------|------|-------------|--|
| Mon1b            | 79   | 1.07 | 0.32 |             |  |
| Lzic             | 576  | 1.07 | 0.06 | NM_026963.2 |  |
| Clspn            | 847  | 1.07 | 0.22 | NM_175554.3 |  |
| LOC193453        | 32   | 1.07 | 0.47 | XM_110047.2 |  |
| 1110003E08Rik    | 230  | 1.07 | 0.11 | XM_284098.2 |  |
| Ints5            | 324  | 1.07 | 0.09 |             |  |
| Il15ra           | 77   | 1.07 | 0.21 | NM_008358.1 |  |
| scl0002624.1_576 | 1017 | 1.07 | 0.04 |             |  |
| Pofut1           | 229  | 1.07 | 0.06 | NM_080463.2 |  |
| E330022B15Rik    | 34   | 1.07 | 0.44 | AK054393    |  |
| Dpp7             | 1989 | 1.07 | 0.05 | NM_031843.2 |  |
| Ttc17            | 450  | 1.07 | 0.12 | NM_183106.1 |  |
| Slc35a2          | 98   | 1.07 | 0.13 | NM_078484   |  |
| Snapc3           | 274  | 1.07 | 0.04 | NM_029949   |  |
| Ddx31            | 273  | 1.07 | 0.11 | XM_355323.1 |  |
| Kcnab2           | 110  | 1.07 | 0.45 | NM_010598.2 |  |
| Kif16a           | 33   | 1.07 | 0.39 |             |  |
| Vav2             | 284  | 1.07 | 0.15 | NM_009500.1 |  |
| Otx1             | 513  | 1.07 | 0.19 | NM_011023.2 |  |
| Igfals           | 643  | 1.07 | 0.09 | NM_008340.2 |  |
| Kpna6            | 159  | 1.07 | 0.14 | NM_008468.1 |  |
| Skp1a            | 1711 | 1.07 | 0.06 | NM_011543.2 |  |
| Hist1h2ab        | 43   | 1.07 | 0.12 | NM_175660.1 |  |
| Raet1c           | 36   | 1.07 | 0.16 | NM_009018   |  |
| Ywhaq            | 2638 | 1.07 | 0.08 | NM_011739   |  |
| Ptpn23           | 112  | 1.07 | 0.34 | XM_135197.4 |  |
| Wipi1            | 1062 | 1.07 | 0.31 |             |  |
| 6030441F14Rik    | 36   | 1.07 | 0.41 | NM_172835.2 |  |
| 9330209C19Rik    | 39   | 1.07 | 0.18 | AK034506    |  |
| Tmem66           | 7795 | 1.07 | 0.09 |             |  |
| 1700051E09Rik    | 140  | 1.07 | 0.17 | NM_026097.1 |  |
| 5730446C15Rik    | 277  | 1.07 | 0.13 | NM_146096   |  |
| Pbk              | 2816 | 1.07 | 0.13 | NM_023209.1 |  |
| A930026I22Rik    | 1399 | 1.07 | 0.16 |             |  |
| 4632415L05Rik    | 45   | 1.07 | 0.24 | NM_027561.2 |  |
| Apbb1            | 1191 | 1.07 | 0.47 | NM_009685.1 |  |
| Pde4b            | 178  | 1.07 | 0.18 | AK051102    |  |
| 2210417J20Rik    | 661  | 1.07 | 0.39 | XM_194140   |  |
| Prpf40b          | 358  | 1.07 | 0.06 |             |  |
| Entpd5           | 397  | 1.07 | 0.08 | NM_007647.1 |  |
| Rnf26            | 543  | 1.07 | 0.10 | NM_153762   |  |
| E2f6             | 2094 | 1.07 | 0.04 | AK035116    |  |
| Mir16            | 6887 | 1.07 | 0.10 | NM_019580.3 |  |
| D230007K08Rik    | 34   | 1.06 | 0.09 | NM_175547.2 |  |
| LOC245502        | 98   | 1.06 | 0.13 | XM_111935.2 |  |
| Gcn5l2           | 1412 | 1.06 | 0.22 | NM_020004.1 |  |
| 2310057J16Rik    | 216  | 1.06 | 0.19 | XM_133997.5 |  |
| Hpcal1           | 201  | 1.06 | 0.12 | NM_016677   |  |
| BC067047         | 457  | 1.06 | 0.14 | XM_485102   |  |
| D130036J04Rik    | 104  | 1.06 | 0.19 | AK051339    |  |
| LOC381134        | 74   | 1.06 | 0.25 | XM_355051.1 |  |
| 4930563C06Rik    | 161  | 1.06 | 0.19 | AK016198    |  |
| BC060631         | 533  | 1.06 | 0.11 | NM_177700.3 |  |
| Mapk3            | 301  | 1.06 | 0.22 | NM_011952.1 |  |
| Itpkb            | 82   | 1.06 | 0.05 | XM_205854.3 |  |
| 4930422I07Rik    | 56   | 1.06 | 0.42 | XM_150216.3 |  |
| Mettl9           | 1964 | 1.06 | 0.06 |             |  |
| scl0002018.1_19  | 40   | 1.06 | 0.67 |             |  |
| Zc3hdc5          | 323  | 1.06 | 0.07 | NM_172569.1 |  |
| A830025K10Rik    | 58   | 1.06 | 0.13 | AK043725    |  |
| B930030B22Rik    | 786  | 1.06 | 0.35 |             |  |
| Kcnk3            | 423  | 1.06 | 0.61 | NM_010608.1 |  |
| Noxo1            | 56   | 1.06 | 0.27 | NM_027988.1 |  |
| Tsnax            | 8785 | 1.06 | 0.14 | NM_016909.1 |  |
| Sfrs2            | 5722 | 1.06 | 0.06 | NM_011358.1 |  |
| scl0004168.1_6   | 185  | 1.06 | 0.19 |             |  |
| Cbx8             | 263  | 1.06 | 0.11 | NM_013926.1 |  |
| Sertad2          | 500  | 1.06 | 0.08 | NM_021372.1 |  |

|               |      |      |      |             |  |
|---------------|------|------|------|-------------|--|
| 8430410K20Rik | 5463 | 1.06 | 0.17 | NM_145609.1 |  |
| AU019532      | 208  | 1.06 | 0.38 | XM_149056.3 |  |
| 5530601I19Rik | 90   | 1.06 | 0.40 | NM_027797   |  |
| Rchy1         | 234  | 1.06 | 0.31 | NM_026557.2 |  |
| LOC328031     | 49   | 1.06 | 0.12 | XM_286390.1 |  |
| Ep400         | 4624 | 1.06 | 0.18 | NM_029337.1 |  |
| LOC381663     | 32   | 1.06 | 0.12 | XM_355630.1 |  |
| Al646023      | 173  | 1.06 | 0.07 | NM_198860.1 |  |
| Carhsp1       | 3105 | 1.06 | 0.05 | NM_025821.2 |  |
| Mapt          | 448  | 1.06 | 0.23 | NM_010838.2 |  |
| 6330405H19    | 124  | 1.06 | 0.44 | XM_358637.1 |  |
| Rap1b         | 9108 | 1.06 | 0.17 | NM_024457.1 |  |
| Gss           | 221  | 1.06 | 0.16 | NM_008180.1 |  |
| Zc3hdc3       | 350  | 1.06 | 0.18 | NM_172121.1 |  |
| Sim2          | 1547 | 1.06 | 0.28 | NM_011377.1 |  |
| B230205O20Rik | 79   | 1.06 | 0.06 |             |  |
| Arhgef11      | 2334 | 1.06 | 0.27 | XM_159702.3 |  |
| D17H6S56E-5   | 1136 | 1.06 | 0.07 | NM_033075.2 |  |
| lpmk          | 803  | 1.06 | 0.09 | XM_125641   |  |
| Nadk          | 4197 | 1.06 | 0.14 |             |  |
| 2310079F23Rik | 40   | 1.06 | 0.46 | NM_030208.1 |  |
| Itm2b         | 2438 | 1.06 | 0.24 | NM_008410.1 |  |
| Extl3         | 858  | 1.06 | 0.12 | NM_018788.2 |  |
| Gstt2         | 32   | 1.06 | 0.78 | AK079739    |  |
| 231006618Rik  | 77   | 1.06 | 0.16 | NM_027346.1 |  |
| 1810014F10Rik | 1919 | 1.06 | 0.18 | NM_026928.1 |  |
| 2310008M20Rik | 135  | 1.06 | 0.03 | NM_025512.2 |  |
| Plunc         | 46   | 1.06 | 0.18 | NM_011126.1 |  |
| 6330577E15Rik | 442  | 1.06 | 0.29 | NM_026377.1 |  |
| l830077J02Rik | 45   | 1.06 | 0.27 |             |  |
| Gpr146        | 88   | 1.06 | 0.25 | NM_030258.2 |  |
| AW555464      | 6640 | 1.06 | 0.19 | XM_127132.3 |  |
| A730086L23Rik | 751  | 1.06 | 0.21 | AK080555    |  |
| Gm347         | 1207 | 1.06 | 0.04 |             |  |
| Zwint         | 9801 | 1.06 | 0.06 | NM_025635.1 |  |
| C3            | 115  | 1.06 | 0.32 | NM_009778.1 |  |
| Il1r12        | 75   | 1.06 | 0.24 | NM_133193   |  |
| 2700092H06Rik | 6813 | 1.06 | 0.08 | XM_132529.2 |  |
| Gdap1         | 3087 | 1.06 | 0.07 | NM_010267.2 |  |
| Uhrf1         | 3394 | 1.06 | 0.18 | NM_010931.2 |  |
| Strap         | 4679 | 1.06 | 0.10 | NM_011499.1 |  |
| Chd4          | 1537 | 1.06 | 0.11 | NM_145979.1 |  |
| Ap3d1         | 1015 | 1.06 | 0.17 | NM_007460.1 |  |
| Cdk5          | 333  | 1.06 | 0.17 | NM_007668.2 |  |
| Ccnt1         | 1733 | 1.06 | 0.02 | NM_009833.1 |  |
| 5330411L03Rik | 203  | 1.06 | 0.06 | XM_485738   |  |
| LOC381703     | 49   | 1.06 | 0.35 | XM_355673.1 |  |
| 1500002C15Rik | 62   | 1.06 | 0.16 | AK005108    |  |
| F11r          | 312  | 1.06 | 0.16 | NM_172647.1 |  |
| Capg          | 64   | 1.06 | 0.08 | NM_007599   |  |
| A330080J22Rik | 668  | 1.06 | 0.03 | NM_178667   |  |
| 2410080H04Rik | 1091 | 1.06 | 0.07 | NM_172522.1 |  |
| Hectd1        | 3115 | 1.06 | 0.36 | XM_354671.1 |  |
| Kctd1         | 438  | 1.06 | 0.05 | XM_355081.1 |  |
| Smurf1        | 89   | 1.06 | 0.12 | NM_029438   |  |
| Dbnl          | 348  | 1.06 | 0.00 | NM_013810.1 |  |
| 1110012E06Rik | 299  | 1.06 | 0.06 | NM_029097.1 |  |
| 2310047D07Rik | 39   | 1.06 | 0.45 | XM_149713.1 |  |
| 4732460K03Rik | 223  | 1.06 | 0.23 |             |  |
| LOC384636     | 44   | 1.06 | 0.29 | XM_357758.1 |  |
| 9830143E02Rik | 154  | 1.06 | 0.30 | AK036626    |  |
| Kcnb1         | 313  | 1.06 | 0.26 | NM_008420.3 |  |
| Amhr2         | 41   | 1.06 | 0.32 | NM_144547.1 |  |
| E430007C11Rik | 66   | 1.06 | 0.32 | AK088198    |  |
| BC043118      | 93   | 1.06 | 0.13 | NM_174848.2 |  |
| Rundc1        | 1082 | 1.06 | 0.14 | NM_172566.1 |  |
| Appbp2        | 2143 | 1.06 | 0.15 | NM_025825.2 |  |
| 1700015E05Rik | 226  | 1.06 | 0.20 | AK005989    |  |

|                  |      |      |      |             |  |
|------------------|------|------|------|-------------|--|
| Atp1b3           | 7057 | 1.06 | 0.05 | NM_007502.1 |  |
| LOC381829        | 35   | 1.06 | 0.29 | XM_358660.1 |  |
| 4930438M06Rik    | 213  | 1.06 | 0.03 | AK015338    |  |
| Fbxo28           | 1192 | 1.06 | 0.16 | NM_175127.1 |  |
| 5730596K20Rik    | 236  | 1.06 | 0.01 | NM_146091.2 |  |
| C030048H21Rik    | 166  | 1.06 | 0.07 | AK021159    |  |
| B630009B09Rik    | 73   | 1.06 | 0.31 | AK046755    |  |
| D130054N24Rik    | 596  | 1.06 | 0.19 | NM_178709.2 |  |
| scl0003448.1_536 | 379  | 1.06 | 0.20 |             |  |
| Faf1             | 4823 | 1.06 | 0.14 | NM_007983.2 |  |
| Hnrpa2b1         | 1569 | 1.06 | 0.02 | NM_016806   |  |
| LOC224833        | 57   | 1.06 | 0.09 | NM_145489.1 |  |
| Jundm2           | 448  | 1.06 | 0.22 | NM_030887.2 |  |
| Irak1            | 577  | 1.06 | 0.39 | NM_008363   |  |
| BC030863         | 547  | 1.06 | 0.04 | XM_359324.1 |  |
| G6pc2            | 36   | 1.06 | 0.30 | NM_021331.1 |  |
| Actr1b           | 2688 | 1.06 | 0.27 | NM_146107   |  |
| LOC380927        | 1814 | 1.06 | 0.08 | XM_354834.1 |  |
| LOC224687        | 30   | 1.06 | 0.42 | XM_139867.3 |  |
| LOC280621        | 49   | 1.06 | 0.25 | NM_175033.1 |  |
| LOC382175        | 34   | 1.06 | 0.28 | XM_356277.1 |  |
| Usp37            | 843  | 1.06 | 0.02 | NM_176972.2 |  |
| Llg1             | 3577 | 1.06 | 0.09 |             |  |
| B930076A02       | 102  | 1.06 | 0.43 | NM_183311.1 |  |
| Ugcg             | 3105 | 1.06 | 0.09 | NM_011673   |  |
| BC031781         | 6870 | 1.06 | 0.14 | NM_145943.1 |  |
| 4933407N01Rik    | 897  | 1.06 | 0.19 | NM_025745.2 |  |
| Mkrm1            | 295  | 1.06 | 0.12 | AK005137    |  |
| Umps             | 1139 | 1.06 | 0.07 | NM_009471.1 |  |
| B930045J24Rik    | 375  | 1.06 | 0.08 | AK047284    |  |
| Tmem9b           | 958  | 1.06 | 0.15 |             |  |
| 9130404D14Rik    | 652  | 1.06 | 0.17 | NM_146119.1 |  |
| Stx3             | 280  | 1.06 | 0.29 | NM_011502   |  |
| Pars2            | 156  | 1.06 | 0.06 |             |  |
| Th1l             | 1309 | 1.06 | 0.11 | NM_020580.1 |  |
| Gip              | 54   | 1.06 | 0.12 | NM_008119.2 |  |
| Nol7             | 148  | 1.06 | 0.27 | NM_023554.1 |  |
| 4930500O05Rik    | 76   | 1.06 | 0.44 |             |  |
| Gpr19            | 999  | 1.06 | 0.30 | NM_008157.1 |  |
| Asb7             | 51   | 1.06 | 0.15 | NM_178236.2 |  |
| Scd2             | 605  | 1.06 | 0.41 | NM_009128.1 |  |
| 5330438F10Rik    | 38   | 1.06 | 0.46 | AK030609    |  |
| 4932443D16Rik    | 1477 | 1.06 | 0.18 |             |  |
| 2010301N04Rik    | 96   | 1.06 | 0.18 | NM_024251.2 |  |
| Thbs3            | 267  | 1.06 | 0.05 | NM_013691.1 |  |
| LOC225021        | 113  | 1.06 | 0.20 | XM_123193.2 |  |
| LOC383456        | 98   | 1.06 | 0.23 | XM_358732.1 |  |
| 2010004N17Rik    | 256  | 1.06 | 0.16 | AK008106    |  |
| LOC385729        | 41   | 1.06 | 0.67 | XM_110879.4 |  |
| Dgkq             | 468  | 1.06 | 0.09 | NM_199011.1 |  |
| 2810405F18Rik    | 1361 | 1.06 | 0.06 | NM_028142.1 |  |
| Zhx3             | 356  | 1.06 | 0.09 | NM_177263   |  |
| B130050I23Rik    | 539  | 1.06 | 0.09 | NM_153536.2 |  |
| Phgdh            | 911  | 1.06 | 0.07 | NM_016966   |  |
| Gla              | 41   | 1.06 | 0.32 | NM_013463.1 |  |
| 1110059E24Rik    | 571  | 1.06 | 0.10 | NM_025423   |  |
| Polr3k           | 806  | 1.06 | 0.21 | NM_025901.2 |  |
| Ostm1            | 4705 | 1.06 | 0.10 | NM_172416.2 |  |
| 9430030N17Rik    | 75   | 1.06 | 0.31 |             |  |
| LOC386085        | 42   | 1.06 | 0.72 | XM_359063.1 |  |
| Rasgrp4          | 39   | 1.06 | 0.21 | NM_145149.1 |  |
| 1110018G07Rik    | 2232 | 1.06 | 0.05 | NM_178065.3 |  |
| Ciz1             | 393  | 1.06 | 0.30 | NM_028412.1 |  |
| 2210011G09Rik    | 511  | 1.06 | 0.08 |             |  |
| BC058674         | 277  | 1.06 | 0.08 | XM_149933.2 |  |
| Acadl            | 220  | 1.06 | 0.16 | NM_007381.2 |  |
| Fts              | 166  | 1.06 | 0.17 | NM_010241.1 |  |
| Pcqap            | 1242 | 1.06 | 0.09 | NM_033609.1 |  |

|                |       |      |      |             |  |
|----------------|-------|------|------|-------------|--|
| Carm1          | 385   | 1.06 | 0.24 | NM_021531.1 |  |
| 2610528K11Rik  | 241   | 1.06 | 0.11 | NM_175184.3 |  |
| 1110031B06Rik  | 926   | 1.06 | 0.32 | NM_144521.1 |  |
| Nde1           | 669   | 1.06 | 0.08 | NM_023317   |  |
| Txin           | 309   | 1.06 | 0.18 | XM_131709.5 |  |
| scl0002907.1_0 | 114   | 1.06 | 0.18 |             |  |
| 2610030H06Rik  | 1428  | 1.06 | 0.17 | XM_110750   |  |
| Hoxa13         | 40    | 1.06 | 0.17 | NM_008264   |  |
| 2310007O11Rik  | 4446  | 1.06 | 0.12 |             |  |
| Dsip1          | 186   | 1.06 | 0.38 | NM_010286.2 |  |
| V1rc25         | 45    | 1.06 | 0.16 | NM_134180.1 |  |
| Trafd1         | 716   | 1.06 | 0.08 |             |  |
| Pkd1i3         | 39    | 1.06 | 0.40 | NM_181544.1 |  |
| Al894139       | 177   | 1.06 | 0.22 | NM_178898.2 |  |
| Elk3           | 120   | 1.06 | 0.25 | NM_013508   |  |
| Pex5           | 470   | 1.06 | 0.17 | NM_175933.1 |  |
| 2700049A03Rik  | 956   | 1.06 | 0.08 | XM_126944.3 |  |
| Als2           | 782   | 1.06 | 0.02 | NM_028717.2 |  |
| Smg6           | 441   | 1.06 | 0.14 |             |  |
| Prkar1a        | 11035 | 1.06 | 0.02 | NM_021880.1 |  |
| Slc16a9        | 52    | 1.06 | 0.55 | NM_025807.1 |  |
| BC042423       | 571   | 1.06 | 0.31 |             |  |
| Lmo6           | 473   | 1.06 | 0.27 | NM_175097.2 |  |
| C630028N24Rik  | 55    | 1.06 | 0.15 | NM_177351   |  |
| Dner           | 4817  | 1.06 | 0.29 | NM_152915.1 |  |
| MGC107702      | 41    | 1.06 | 0.18 |             |  |
| Prmt2          | 2086  | 1.06 | 0.14 |             |  |
| Tex27          | 4805  | 1.06 | 0.16 | NM_148926.1 |  |
| LOC381241      | 755   | 1.06 | 0.10 | XM_355183.1 |  |
| Sec61          | 416   | 1.06 | 0.28 | NM_177333   |  |
| D130007C19Rik  | 49    | 1.06 | 0.22 | AK051152    |  |
| Arl1           | 5610  | 1.06 | 0.09 | NM_025859.1 |  |
| Mtf2           | 1250  | 1.06 | 0.07 | NM_013827.1 |  |
| 2610036D13Rik  | 843   | 1.06 | 0.21 | NM_029282.1 |  |
| Ift172         | 1053  | 1.06 | 0.07 | NM_026298.4 |  |
| Scp2           | 1992  | 1.06 | 0.13 | NM_011327.1 |  |
| Zfp46          | 1112  | 1.06 | 0.14 | NM_009557.1 |  |
| Gm83           | 1566  | 1.05 | 0.27 | NM_198606.1 |  |
| Cplx1          | 683   | 1.05 | 0.10 | NM_007756.2 |  |
| Bag3           | 2347  | 1.05 | 0.22 | NM_013863.3 |  |
| Fbxw4          | 127   | 1.05 | 0.08 | NM_013907.1 |  |
| Foxo1          | 165   | 1.05 | 0.13 | NM_019739.2 |  |
| 2400003C14Rik  | 1813  | 1.05 | 0.10 | NM_028018.1 |  |
| Creb3l2        | 694   | 1.05 | 0.07 | NM_178661.2 |  |
| Dctn2          | 4301  | 1.05 | 0.14 | NM_027151.1 |  |
| BC052486       | 221   | 1.05 | 0.24 |             |  |
| Fbxo15         | 35    | 1.05 | 0.19 |             |  |
| 2210008I11Rik  | 5580  | 1.05 | 0.12 | NM_145124   |  |
| Gdap4          | 38    | 1.05 | 0.10 |             |  |
| Ppm1a          | 4679  | 1.05 | 0.19 | NM_008910.2 |  |
| Smarca5        | 292   | 1.05 | 0.35 | NM_053124.2 |  |
| Crry           | 161   | 1.05 | 0.03 | NM_013499   |  |
| 2810439F02Rik  | 225   | 1.05 | 0.04 | AK080904    |  |
| 3110049J23Rik  | 119   | 1.05 | 0.28 | NM_026085.1 |  |
| Bcat2          | 91    | 1.05 | 0.69 | NM_009737.1 |  |
| Ngfa           | 1281  | 1.05 | 0.36 | NM_010915.1 |  |
| Cyp27a1        | 54    | 1.05 | 0.17 | NM_024264.3 |  |
| Igsf4a         | 238   | 1.05 | 0.29 | NM_018770   |  |
| Slc6a9         | 650   | 1.05 | 0.07 | NM_008135   |  |
| Wbp2           | 24375 | 1.05 | 0.32 | NM_016852.1 |  |
| Rab5b          | 192   | 1.05 | 0.20 | NM_177411.2 |  |
| Man2b1         | 1052  | 1.05 | 0.08 | NM_010764   |  |
| Tpst1          | 5164  | 1.05 | 0.19 | NM_013837.1 |  |
| 2210419D22Rik  | 2365  | 1.05 | 0.28 |             |  |
| Sin3a          | 902   | 1.05 | 0.20 | NM_011378.1 |  |
| Suz12          | 3354  | 1.05 | 0.11 |             |  |
| 2700085M18Rik  | 97    | 1.05 | 0.44 | NM_030198.1 |  |
| Ppat           | 1139  | 1.05 | 0.13 | NM_172146   |  |

|                 |       |      |      |             |  |
|-----------------|-------|------|------|-------------|--|
| Olf134          | 46    | 1.05 | 0.11 | NM_146832.1 |  |
| C77668          | 1566  | 1.05 | 0.18 | NM_145540.2 |  |
| Hsp105          | 9967  | 1.05 | 0.25 | NM_013559.1 |  |
| Azi1            | 548   | 1.05 | 0.13 | NM_009734.1 |  |
| Gm817           | 54    | 1.05 | 0.50 |             |  |
| Ncaph2          | 1416  | 1.05 | 0.15 |             |  |
| Ndor1           | 210   | 1.05 | 0.11 | NM_178239.2 |  |
| Zcwcc1          | 3939  | 1.05 | 0.22 | NM_198162.1 |  |
| Olf1724         | 132   | 1.05 | 0.13 | NM_146492.1 |  |
| 1700034P14Rik   | 105   | 1.05 | 0.17 | AK006608    |  |
| Sec63           | 2337  | 1.05 | 0.15 | NM_153055.2 |  |
| 2810422O20Rik   | 91    | 1.05 | 0.05 | NM_027279.2 |  |
| B4galt4         | 206   | 1.05 | 0.14 | NM_019804.1 |  |
| Zfp106          | 136   | 1.05 | 0.41 | AK031440    |  |
| Zbtb16          | 55    | 1.05 | 0.26 | XM_134826.2 |  |
| Eml4            | 587   | 1.05 | 0.15 | NM_199466   |  |
| Paip2           | 1889  | 1.05 | 0.07 | NM_026420.1 |  |
| D330004F16Rik   | 179   | 1.05 | 0.21 | AK084474    |  |
| A230020J09Rik   | 49    | 1.05 | 0.29 | AK038497    |  |
| Coq10b          | 2886  | 1.05 | 0.09 |             |  |
| 4833445A15Rik   | 882   | 1.05 | 0.04 | AK076536    |  |
| Pitrm1          | 1977  | 1.05 | 0.06 | NM_145131.1 |  |
| D1Pas1          | 34    | 1.05 | 0.62 | NM_033077.2 |  |
| Rfx1            | 212   | 1.05 | 0.04 | NM_009055.2 |  |
| A830096H11Rik   | 348   | 1.05 | 0.08 | AK044162    |  |
| LOC381414       | 49    | 1.05 | 0.06 | XM_358569.1 |  |
| Nol11           | 488   | 1.05 | 0.10 |             |  |
| BC017647        | 1935  | 1.05 | 0.11 | NM_145430.1 |  |
| Snn             | 786   | 1.05 | 0.22 | NM_009223.1 |  |
| Prkar2b         | 1249  | 1.05 | 0.24 | NM_011158.2 |  |
| Aps-pending     | 65    | 1.05 | 0.22 | AK017604    |  |
| 4930422J18Rik   | 624   | 1.05 | 0.07 | NM_029035.2 |  |
| Acacb           | 485   | 1.05 | 0.21 | XM_132282.2 |  |
| 0610025P10Rik   | 238   | 1.05 | 0.18 | XM_126221.4 |  |
| Dos             | 223   | 1.05 | 0.14 | XM_125771.5 |  |
| D10Wsu52e       | 3491  | 1.05 | 0.09 | NM_145422.1 |  |
| 5830467E07Rik   | 86    | 1.05 | 0.03 | XM_149818.1 |  |
| Pigc            | 45    | 1.05 | 0.32 | NM_026078.1 |  |
| LOC224046       | 53    | 1.05 | 0.18 | XM_147198.3 |  |
| Pygb            | 1997  | 1.05 | 0.12 | NM_153781.1 |  |
| 1110054N06Rik   | 1133  | 1.05 | 0.06 | NM_175134.2 |  |
| C130064E22Rik   | 168   | 1.05 | 0.09 | AK048477    |  |
| Tesk1           | 116   | 1.05 | 0.15 | NM_011571.2 |  |
| 8430419L09Rik   | 237   | 1.05 | 0.15 | NM_028982.2 |  |
| Cdc25b          | 392   | 1.05 | 0.13 | NM_023117   |  |
| AI551093        | 736   | 1.05 | 0.10 |             |  |
| Emilin1         | 80    | 1.05 | 0.45 | NM_133918.1 |  |
| Ssr3            | 11699 | 1.05 | 0.06 | NM_026155.1 |  |
| 2810436B12Rik   | 47    | 1.05 | 0.14 |             |  |
| Tdrkh           | 726   | 1.05 | 0.06 | XM_131021.5 |  |
| 6430408L10Rik   | 52    | 1.05 | 0.33 | AK032187    |  |
| Tgif            | 429   | 1.05 | 0.05 | NM_009372.2 |  |
| Gtl3            | 324   | 1.05 | 0.11 | NM_008187.1 |  |
| Anp32e          | 1786  | 1.05 | 0.15 | NM_023210.2 |  |
| 9430077A04Rik   | 49    | 1.05 | 0.07 | NM_177134.2 |  |
| Mgl1            | 53    | 1.05 | 0.54 | NM_010796.1 |  |
| Adipor2         | 2703  | 1.05 | 0.06 | NM_197985.2 |  |
| Camta2          | 2226  | 1.05 | 0.28 | NM_178116.2 |  |
| BC066028        | 3357  | 1.05 | 0.09 |             |  |
| Rhob            | 1416  | 1.05 | 0.67 | NM_007483.2 |  |
| LOC382215       | 3388  | 1.05 | 0.23 | XM_356328.1 |  |
| scl0002850.1_66 | 37    | 1.05 | 0.62 |             |  |
| BC006933        | 2796  | 1.05 | 0.27 | NM_146040.1 |  |
| Pea15           | 494   | 1.05 | 0.22 | NM_011063.1 |  |
| Jmjd5           | 158   | 1.05 | 0.15 |             |  |
| Ppp1r9b         | 639   | 1.05 | 0.18 | NM_172261.1 |  |
| App5l           | 630   | 1.05 | 0.10 | NM_053069.2 |  |
| Kctd20          | 753   | 1.05 | 0.02 |             |  |

|               |       |      |      |              |  |
|---------------|-------|------|------|--------------|--|
| C230081G24Rik | 31    | 1.05 | 0.69 | AK048916     |  |
| Zfyve19       | 77    | 1.05 | 0.24 | NM_028054.1  |  |
| 2610014F08Rik | 288   | 1.05 | 0.23 | XM_130321.4  |  |
| 9630009A08Rik | 46    | 1.05 | 0.67 | AK035833     |  |
| H3f3b         | 21602 | 1.05 | 0.10 | NM_008211.2  |  |
| Statip1       | 1444  | 1.05 | 0.05 | AK044699     |  |
| Baiap1        | 150   | 1.05 | 0.40 | NM_010367    |  |
| Centb5        | 617   | 1.05 | 0.20 | XM_131838.5  |  |
| LOC271374     | 38    | 1.05 | 0.32 | XM_195002.2  |  |
| Mpp1          | 2877  | 1.05 | 0.17 | AK036415     |  |
| Abca3         | 1974  | 1.05 | 0.12 | NM_013855.1  |  |
| Wasf1         | 6842  | 1.05 | 0.11 | NM_031877.2  |  |
| B930093C12Rik | 151   | 1.05 | 0.43 | NM_172945.1  |  |
| LOC381922     | 36    | 1.05 | 0.12 | XM_358678.1  |  |
| 9530007E02Rik | 59    | 1.05 | 0.12 | AK035265     |  |
| Toe1          | 420   | 1.05 | 0.09 |              |  |
| Vti1a         | 347   | 1.05 | 0.04 | NM_183291.1  |  |
| Cdc14b        | 311   | 1.05 | 0.06 | NM_172587.2  |  |
| Ecm1          | 48    | 1.05 | 0.09 | NM_007899    |  |
| 1700011I11Rik | 236   | 1.05 | 0.28 | NM_029291    |  |
| A530017D24Rik | 186   | 1.05 | 0.20 |              |  |
| Prmt3         | 2350  | 1.05 | 0.19 |              |  |
| Mcc           | 53    | 1.05 | 0.14 |              |  |
| C820004B04Rik | 53    | 1.05 | 0.10 | NM_176901.2  |  |
| Hap1          | 1064  | 1.05 | 0.06 | NM_010404.2  |  |
| Cyb561        | 6830  | 1.05 | 0.19 | NM_007805.2  |  |
| A930033C01Rik | 58    | 1.05 | 0.23 | XM_132396    |  |
| Epor          | 45    | 1.05 | 0.37 | NM_010149.2  |  |
| C130002N06    | 49    | 1.05 | 0.14 |              |  |
| 2610528H13Rik | 40    | 1.05 | 0.41 | NM_145944    |  |
| 1300002F13Rik | 5682  | 1.05 | 0.28 | NM_133753.1  |  |
| Frmf6         | 240   | 1.05 | 0.20 |              |  |
| 1500031A17Rik | 700   | 1.05 | 0.13 | XM_130797.3  |  |
| Maea          | 1500  | 1.05 | 0.06 | NM_021500    |  |
| Zranb2        | 5099  | 1.05 | 0.10 |              |  |
| LOC629605     | 202   | 1.05 | 0.15 |              |  |
| 9630055N22Rik | 1300  | 1.05 | 0.34 | NM_198025.1  |  |
| Flrt1         | 91    | 1.05 | 0.38 | NM_201411.1  |  |
| Phf17         | 718   | 1.05 | 0.23 | BC020316     |  |
| Otub2         | 1396  | 1.05 | 0.20 | NM_026580.1  |  |
| 4930428J16Rik | 50    | 1.05 | 0.25 | XM_129160.4  |  |
| Phc1          | 867   | 1.05 | 0.18 | NM_007905.1  |  |
| B930001L07Rik | 40    | 1.05 | 0.57 | AK046898     |  |
| Rhbdl6        | 38    | 1.05 | 0.44 | NM_172572.1  |  |
| Usp20         | 1405  | 1.05 | 0.16 | NM_028846.1  |  |
| 1600021P15Rik | 1489  | 1.05 | 0.29 |              |  |
| C330001N20Rik | 7586  | 1.05 | 0.27 | AK021168     |  |
| D6Ertf538e    | 680   | 1.05 | 0.06 | NM_001001160 |  |
| 2610020N02Rik | 661   | 1.05 | 0.13 | NM_181470.2  |  |
| 2310069I04Rik | 209   | 1.05 | 0.34 | NM_133715.1  |  |
| D130004H04Rik | 353   | 1.05 | 0.05 |              |  |
| 4932413O14Rik | 76    | 1.05 | 0.14 | NM_177230.2  |  |
| Acad8         | 90    | 1.05 | 0.17 | NM_025862.1  |  |
| C230067O06Rik | 1600  | 1.05 | 0.08 | AK082600     |  |
| Ap3m2         | 130   | 1.05 | 0.04 | AK080668     |  |
| Lrch3         | 127   | 1.05 | 0.17 |              |  |
| Zfp207        | 930   | 1.05 | 0.13 | AK033497     |  |
| Gmppb         | 182   | 1.05 | 0.12 | NM_177910.2  |  |
| Sox2          | 41    | 1.05 | 0.62 | NM_011443.2  |  |
| Cfdp1         | 723   | 1.05 | 0.14 | NM_011801.1  |  |
| Mcat          | 197   | 1.05 | 0.15 |              |  |
| Fsd1          | 144   | 1.05 | 0.01 | NM_183178.1  |  |
| Mgat4a        | 158   | 1.05 | 0.26 | NM_173870.1  |  |
| 1700016D02Rik | 612   | 1.05 | 0.09 | XM_358455.1  |  |
| D030060M11Rik | 338   | 1.05 | 0.29 | NM_146000.1  |  |
| Fgfr1         | 100   | 1.05 | 0.40 | NM_010206.1  |  |
| Pcca          | 296   | 1.05 | 0.05 | NM_144844.1  |  |
| Adk           | 1289  | 1.05 | 0.13 | NM_134079    |  |



|                 |       |      |      |             |  |
|-----------------|-------|------|------|-------------|--|
| Ang1            | 49    | 1.05 | 0.24 | NM_007447   |  |
| Stk36           | 361   | 1.05 | 0.37 |             |  |
| Pdcd10          | 1534  | 1.05 | 0.13 | NM_019745.2 |  |
| Olfir665        | 43    | 1.05 | 0.31 | NM_146814   |  |
| Pnrc2           | 2017  | 1.05 | 0.09 | NM_026383.1 |  |
| Skp2            | 464   | 1.05 | 0.10 | AK037002    |  |
| 9330147J08Rik   | 390   | 1.05 | 0.31 |             |  |
| Smarcb1         | 1178  | 1.05 | 0.17 | NM_011418.1 |  |
| Egr4            | 119   | 1.05 | 0.12 | NM_020596.1 |  |
| LOC385651       | 117   | 1.05 | 0.23 | XM_358846.1 |  |
| 6030446119Rik   | 157   | 1.05 | 0.38 | NM_146122.2 |  |
| E430012M05Rik   | 161   | 1.05 | 0.17 | NM_177310.2 |  |
| 1100001F19Rik   | 3224  | 1.05 | 0.11 | XM_124187.1 |  |
| Nfs1            | 423   | 1.05 | 0.04 | AK084831    |  |
| BC002236        | 1143  | 1.05 | 0.19 | NM_024475.2 |  |
| 9530095P18Rik   | 118   | 1.05 | 0.38 | AK079301    |  |
| 2700075B01Rik   | 136   | 1.05 | 0.10 | NM_029669.2 |  |
| Hexim2          | 122   | 1.05 | 0.23 |             |  |
| Tead4           | 62    | 1.05 | 0.15 | NM_011567.1 |  |
| LOC217431       | 70    | 1.05 | 0.27 | XM_126825.3 |  |
| 2610319K07Rik   | 1477  | 1.05 | 0.17 | NM_028264.2 |  |
| Brd7            | 398   | 1.05 | 0.07 | NM_012047   |  |
| Mtpn            | 1257  | 1.05 | 0.05 | NM_008098.2 |  |
| C130045I22Rik   | 178   | 1.05 | 0.16 |             |  |
| Clic4           | 7678  | 1.05 | 0.05 | XM_124389.1 |  |
| Lgmn            | 4450  | 1.05 | 0.05 | NM_011175.1 |  |
| Chic1           | 197   | 1.05 | 0.09 | XM_486740   |  |
| 4930521E07Rik   | 624   | 1.05 | 0.07 | NM_026260.2 |  |
| Ythdf2          | 2660  | 1.05 | 0.05 | NM_145393   |  |
| 9430069J07Rik   | 558   | 1.05 | 0.20 | NM_213727   |  |
| Ftsj3           | 1322  | 1.05 | 0.34 | NM_025310.2 |  |
| Clgn            | 574   | 1.04 | 0.16 | NM_009904   |  |
| Megf10          | 37    | 1.04 | 0.19 |             |  |
| Araf            | 1254  | 1.04 | 0.05 | AK010060    |  |
| Anks1           | 217   | 1.04 | 0.23 | NM_181413.2 |  |
| Igfbp1          | 384   | 1.04 | 0.07 | AK032709    |  |
| Lrp11           | 13080 | 1.04 | 0.07 | NM_172784.1 |  |
| 4930402I03Rik   | 38    | 1.04 | 0.17 | AK029576    |  |
| Socs7           | 86    | 1.04 | 0.31 | NM_138657.1 |  |
| Thumpd3         | 1247  | 1.04 | 0.12 |             |  |
| 4930418J05Rik   | 97    | 1.04 | 0.21 | AK015166    |  |
| Nr1d2           | 256   | 1.04 | 0.36 | NM_011584.2 |  |
| Napb            | 670   | 1.04 | 0.14 | NM_019632   |  |
| Ash2l           | 1072  | 1.04 | 0.16 | NM_011791.1 |  |
| LOC382765       | 52    | 1.04 | 0.16 | XM_356666.1 |  |
| Sema4d          | 86    | 1.04 | 0.56 | NM_013660.1 |  |
| Mfi2            | 44    | 1.04 | 0.17 | NM_013900.1 |  |
| Catns           | 182   | 1.04 | 0.44 | NM_007615.1 |  |
| 1700020I14Rik   | 45    | 1.04 | 0.11 | AK030275    |  |
| Rutbc2          | 1258  | 1.04 | 0.21 | NM_172718.1 |  |
| 5730472N09Rik   | 989   | 1.04 | 0.16 | NM_175392.3 |  |
| B130015M16Rik   | 670   | 1.04 | 0.16 | AK044956    |  |
| 5530402M19Rik   | 482   | 1.04 | 0.20 |             |  |
| Riok3           | 2411  | 1.04 | 0.04 | NM_024182.2 |  |
| Wdr13           | 226   | 1.04 | 0.20 | NM_026137.1 |  |
| LOC381825       | 472   | 1.04 | 0.15 | XM_355825.1 |  |
| scl0004020.1_31 | 7374  | 1.04 | 0.24 |             |  |
| 5330427M13Rik   | 43    | 1.04 | 0.25 | XM_140850.3 |  |
| scl000438.1_148 | 196   | 1.04 | 0.16 |             |  |
| B230331O10Rik   | 62    | 1.04 | 0.20 | AK045996    |  |
| Nfia            | 66    | 1.04 | 0.10 | NM_010905.1 |  |
| Fbxo34          | 603   | 1.04 | 0.06 | NM_030236.1 |  |
| Coro1b          | 1073  | 1.04 | 0.08 | NM_011778.1 |  |
| 1810013H02Rik   | 2206  | 1.04 | 0.13 |             |  |
| Gtf2ird2        | 456   | 1.04 | 0.10 |             |  |
| Sphk2           | 445   | 1.04 | 0.29 | NM_203280.1 |  |
| Acvr2b          | 1482  | 1.04 | 0.12 | NM_007397.1 |  |
| LOC386144       | 244   | 1.04 | 0.17 | XM_359091.1 |  |

|                  |       |      |      |             |  |
|------------------|-------|------|------|-------------|--|
| Rad21            | 60    | 1.04 | 0.74 | NM_009009.2 |  |
| E130307J04Rik    | 42    | 1.04 | 0.17 | NM_178780.2 |  |
| 4932414K18Rik    | 6304  | 1.04 | 0.09 | NM_173764   |  |
| Pygm             | 160   | 1.04 | 0.14 | NM_011224.1 |  |
| Napa             | 790   | 1.04 | 0.10 | NM_025898.1 |  |
| Orc5l            | 2009  | 1.04 | 0.24 | NM_011959.1 |  |
| Heatr3           | 109   | 1.04 | 0.37 |             |  |
| LOC386537        | 81    | 1.04 | 0.05 | XM_359381.1 |  |
| Mcm2             | 5112  | 1.04 | 0.12 | NM_008564.1 |  |
| 5730406I15Rik    | 36    | 1.04 | 0.87 | NM_025668.1 |  |
| Celsr3           | 841   | 1.04 | 0.17 | NM_080437.1 |  |
| Rgs4             | 115   | 1.04 | 0.15 | NM_009062.2 |  |
| A830054O07Rik    | 83    | 1.04 | 0.03 |             |  |
| LOC270156        | 74    | 1.04 | 0.26 | XM_194457.2 |  |
| Npn3             | 1177  | 1.04 | 0.07 | NM_029688.2 |  |
| Elavl1           | 1562  | 1.04 | 0.14 | NM_010485.2 |  |
| Il10rb           | 514   | 1.04 | 0.18 | NM_008349.1 |  |
| Wbscr1           | 24701 | 1.04 | 0.10 | NM_033561.1 |  |
| Art1             | 44    | 1.04 | 0.19 | AK009284    |  |
| BC021523         | 99    | 1.04 | 0.27 | NM_172611.1 |  |
| 1700028I16Rik    | 52    | 1.04 | 0.24 |             |  |
| 2010313D22Rik    | 2303  | 1.04 | 0.30 |             |  |
| 6430706D22Rik    | 5265  | 1.04 | 0.28 |             |  |
| Trim45           | 53    | 1.04 | 0.10 | NM_194343.1 |  |
| 1700057H15Rik    | 46    | 1.04 | 0.20 | XM_287378.1 |  |
| Crat             | 80    | 1.04 | 0.06 | NM_007760   |  |
| Gga3             | 317   | 1.04 | 0.14 | NM_173048.1 |  |
| Pkp1             | 40    | 1.04 | 0.49 | NM_019645.1 |  |
| Smad4            | 8681  | 1.04 | 0.07 | NM_008540.2 |  |
| Smug1            | 774   | 1.04 | 0.13 | NM_027885.2 |  |
| 9130017N09Rik    | 106   | 1.04 | 0.38 | NM_030218.1 |  |
| 9630009L01Rik    | 82    | 1.04 | 0.19 | AK035840    |  |
| Coq4             | 245   | 1.04 | 0.15 | NM_178693.2 |  |
| Pkp4             | 534   | 1.04 | 0.08 | XM_130277.3 |  |
| Rnf121           | 90    | 1.04 | 0.14 | NM_029211   |  |
| Tmem1            | 862   | 1.04 | 0.22 | XM_125775   |  |
| Slc30a6          | 665   | 1.04 | 0.10 | NM_144798.2 |  |
| Tcp1             | 2947  | 1.04 | 0.16 | NM_013686   |  |
| Mlp              | 955   | 1.04 | 0.37 | NM_010807.2 |  |
| Hprt             | 4163  | 1.04 | 0.26 | NM_013556   |  |
| Heatr1           | 1840  | 1.04 | 0.20 |             |  |
| Rap1gds1         | 2816  | 1.04 | 0.14 | NM_145544   |  |
| 1500009L16Rik    | 70    | 1.04 | 0.63 |             |  |
| 2610208M17Rik    | 928   | 1.04 | 0.11 | NM_145626.1 |  |
| Dusp11           | 2228  | 1.04 | 0.16 | NM_028099.2 |  |
| Fbxo16           | 106   | 1.04 | 0.27 | NM_015795.1 |  |
| Cxadr            | 1387  | 1.04 | 0.10 | AK004908    |  |
| Gcnt2            | 60    | 1.04 | 0.20 | NM_133219.1 |  |
| Gtl2             | 32    | 1.04 | 0.17 | NM_144513   |  |
| Asph             | 111   | 1.04 | 0.16 | NM_023066   |  |
| 2610301B20Rik    | 226   | 1.04 | 0.07 | NM_026005.2 |  |
| 2610020H15Rik    | 2388  | 1.04 | 0.13 | NM_025638.1 |  |
| A930030J18Rik    | 113   | 1.04 | 0.13 | AK044660    |  |
| LOC381727        | 48    | 1.04 | 0.08 | XM_355703.1 |  |
| Cdc2a            | 1351  | 1.04 | 0.16 | NM_007659.2 |  |
| lfrg15           | 323   | 1.04 | 0.37 | NM_022329.2 |  |
| A630082N15Rik    | 105   | 1.04 | 0.05 | NM_177144.2 |  |
| Mab21l2          | 89    | 1.04 | 0.16 | NM_011839.2 |  |
| C630004H02Rik    | 700   | 1.04 | 0.06 | NM_175454.1 |  |
| Pcdhgc3          | 32    | 1.04 | 0.61 | AK089310    |  |
| 1110001C20Rik    | 1882  | 1.04 | 0.18 | NM_177730.2 |  |
| 1700049E17Rik    | 658   | 1.04 | 0.11 | NM_028535.1 |  |
| Ttc5             | 446   | 1.04 | 0.17 | NM_177625.2 |  |
| LOC382737        | 386   | 1.04 | 0.12 | XM_356650.1 |  |
| Fchsd1           | 204   | 1.04 | 0.22 | NM_175684.3 |  |
| AI849156         | 97    | 1.04 | 0.16 | NM_183142.1 |  |
| scl0002962.1_181 | 231   | 1.04 | 0.14 |             |  |
| Onecut2          | 1003  | 1.04 | 0.40 | NM_194268.1 |  |

|                 |       |      |      |              |  |
|-----------------|-------|------|------|--------------|--|
| Tln1            | 86    | 1.04 | 0.36 | NM_011602.2  |  |
| Gprin1          | 5504  | 1.04 | 0.15 | NM_012014.1  |  |
| LOC382162       | 349   | 1.04 | 0.18 | XM_356262.1  |  |
| Mboat2          | 259   | 1.04 | 0.12 |              |  |
| BC039093        | 1754  | 1.04 | 0.30 | XM_131700.4  |  |
| Ryk             | 2478  | 1.04 | 0.08 | NM_013649.2  |  |
| 2510039O18Rik   | 1430  | 1.04 | 0.19 | NM_029841.1  |  |
| BC011210        | 180   | 1.04 | 0.27 | NM_173863.1  |  |
| Rabif           | 684   | 1.04 | 0.16 | NM_145510.1  |  |
| D330028D13Rik   | 1751  | 1.04 | 0.18 | NM_172727.1  |  |
| Pafah2          | 193   | 1.04 | 0.11 | NM_133880.1  |  |
| Cables2         | 318   | 1.04 | 0.10 | NM_145851    |  |
| Sh3md1          | 36    | 1.04 | 0.51 | NM_008018.1  |  |
| Fbxl16          | 565   | 1.04 | 0.40 | XM_128530.4  |  |
| BC022641        | 487   | 1.04 | 0.13 | NM_181594.2  |  |
| Tada2l          | 160   | 1.04 | 0.20 | NM_172562    |  |
| 2810468K17Rik   | 199   | 1.04 | 0.15 | NM_028369.1  |  |
| Reps1           | 1822  | 1.04 | 0.02 | AK041967     |  |
| Zbtb33          | 486   | 1.04 | 0.13 | NM_020256.1  |  |
| D11Moh35        | 378   | 1.04 | 0.16 | NM_172300.2  |  |
| D10627          | 335   | 1.04 | 0.26 | XM_486116    |  |
| C730023J07Rik   | 94    | 1.04 | 0.09 | AK050154     |  |
| Trp53bp2        | 223   | 1.04 | 0.12 | NM_173378.1  |  |
| Kdr             | 43    | 1.04 | 0.23 | AK054510     |  |
| Kbtbd4          | 685   | 1.04 | 0.10 | NM_025991.1  |  |
| Cnksr2          | 40    | 1.04 | 0.34 | NM_177751.2  |  |
| Tomm70a         | 1539  | 1.04 | 0.27 | NM_138599.2  |  |
| Qars            | 557   | 1.04 | 0.04 | XM_486261    |  |
| 9030221M09Rik   | 104   | 1.04 | 0.21 | NM_177298.2  |  |
| scl0004085.1_27 | 273   | 1.04 | 0.23 |              |  |
| A930031D07Rik   | 58    | 1.04 | 0.34 | NM_172510    |  |
| Hs6st1          | 1112  | 1.04 | 0.43 | XM_147286.1  |  |
| A830091I15Rik   | 88    | 1.04 | 0.34 | NM_172795.2  |  |
| TEF3            | 51    | 1.04 | 0.08 | AK036619     |  |
| 4922501C03Rik   | 258   | 1.04 | 0.09 | NM_199316.1  |  |
| Hfe             | 38    | 1.04 | 0.36 | NM_010424.2  |  |
| Rbms1           | 693   | 1.04 | 0.29 | NM_020296.1  |  |
| E130012E10Rik   | 165   | 1.04 | 0.31 | AK053369     |  |
| D430006A07Rik   | 34    | 1.04 | 0.73 | AK084888     |  |
| Zfp161          | 152   | 1.04 | 0.41 | NM_009547    |  |
| BC022687        | 377   | 1.04 | 0.15 | NM_145450.2  |  |
| 4932412H11Rik   | 44    | 1.04 | 0.29 | NM_172879.1  |  |
| Coil            | 198   | 1.04 | 0.21 | NM_016706.1  |  |
| D230004N23Rik   | 34    | 1.04 | 0.49 | AK084171     |  |
| Mark2           | 3382  | 1.04 | 0.13 | NM_007928    |  |
| Hspcb           | 11356 | 1.04 | 0.07 | NM_008302.2  |  |
| 1810009N02Rik   | 115   | 1.04 | 0.26 | NM_026939.1  |  |
| scl0003125.1_0  | 36    | 1.04 | 0.22 |              |  |
| Pole4           | 497   | 1.04 | 0.05 | NM_025882.1  |  |
| Pdpk1           | 584   | 1.04 | 0.09 | NM_011062.1  |  |
| Dnb5            | 177   | 1.04 | 0.33 | NM_173774.2  |  |
| Rgs7            | 596   | 1.04 | 0.10 | NM_011880.1  |  |
| 2810475A17Rik   | 2341  | 1.04 | 0.10 | NM_028355.1  |  |
| 1200013F24Rik   | 485   | 1.04 | 0.15 | AK045433     |  |
| Grb7            | 9692  | 1.04 | 0.07 | NM_010346    |  |
| 1700022N24Rik   | 227   | 1.04 | 0.16 | NM_145355.2  |  |
| Akap8           | 102   | 1.04 | 0.36 | AK030964     |  |
| Hoxc6           | 460   | 1.04 | 0.05 | NM_010465.1  |  |
| Sdf4            | 612   | 1.04 | 0.05 | NM_011341.3  |  |
| Zfp35           | 222   | 1.04 | 0.23 | NM_011755.1  |  |
| Polg            | 330   | 1.04 | 0.12 | NM_017462.1  |  |
| 2510009E07Rik   | 1977  | 1.04 | 0.12 | NM_001001881 |  |
| C130073O12Rik   | 663   | 1.04 | 0.20 | AK081751     |  |
| BC052040        | 2365  | 1.04 | 0.30 | NM_207264.2  |  |
| Snx10           | 2576  | 1.04 | 0.10 | NM_028035.2  |  |
| Zfp98           | 566   | 1.04 | 0.34 | NM_016793.1  |  |
| B930096L08Rik   | 586   | 1.04 | 0.25 | NM_172477.1  |  |
| Spag4           | 214   | 1.04 | 0.05 | NM_139151    |  |

|                 |       |      |      |             |  |
|-----------------|-------|------|------|-------------|--|
| Abcb9           | 192   | 1.04 | 0.13 | NM_019875   |  |
| Slc16a10        | 169   | 1.04 | 0.18 | NM_028247.1 |  |
| Art5            | 91    | 1.04 | 0.22 | NM_007491.1 |  |
| 2610020C11Rik   | 65    | 1.04 | 0.22 | NM_028130.2 |  |
| Gosr1           | 265   | 1.04 | 0.18 | NM_016810.2 |  |
| scl0002883.1_98 | 271   | 1.04 | 0.09 |             |  |
| Ilf3            | 870   | 1.04 | 0.02 | NM_010561.1 |  |
| D030022C03Rik   | 41    | 1.04 | 0.29 | AK050817    |  |
| Aldh1b1         | 302   | 1.04 | 0.11 | NM_028270.2 |  |
| Brrn1           | 1579  | 1.04 | 0.36 | NM_144818   |  |
| Sh3tc1          | 53    | 1.04 | 0.24 | NM_194344.1 |  |
| Renbp           | 181   | 1.04 | 0.10 | NM_023132.1 |  |
| Mat2b           | 437   | 1.04 | 0.04 | NM_134017.1 |  |
| LOC382237       | 341   | 1.04 | 0.17 | XM_356351.1 |  |
| Stc1            | 620   | 1.04 | 0.23 | NM_009285   |  |
| Taz             | 825   | 1.04 | 0.06 | NM_181516.2 |  |
| 2210417D09Rik   | 74    | 1.04 | 0.11 | NM_025620.1 |  |
| Ppfia1          | 1654  | 1.04 | 0.04 | XM_133979   |  |
| Dnajc5          | 3979  | 1.04 | 0.09 | NM_016775.2 |  |
| Olf352          | 47    | 1.04 | 0.24 | NM_146940.1 |  |
| Arhgap1         | 1270  | 1.04 | 0.04 | NM_146124.2 |  |
| Fbxo21          | 1993  | 1.04 | 0.21 | NM_145564.2 |  |
| Akt2            | 304   | 1.04 | 0.23 | NM_007434.2 |  |
| Bre             | 661   | 1.04 | 0.07 | NM_144541   |  |
| ORF61           | 2144  | 1.04 | 0.25 | XM_109575.3 |  |
| Pigt            | 11784 | 1.04 | 0.09 | NM_133779   |  |
| Gtpbp2          | 3359  | 1.04 | 0.02 | NM_019581.2 |  |
| Cmas            | 3102  | 1.04 | 0.32 | NM_009908.1 |  |
| Crk             | 1657  | 1.04 | 0.15 | NM_133656   |  |
| D11Erd707e      | 1479  | 1.04 | 0.04 | NM_025918.1 |  |
| DXImx46e        | 1520  | 1.03 | 0.06 | NM_138604.2 |  |
| Asb9            | 37    | 1.03 | 0.37 | NM_027027.1 |  |
| Ece1            | 715   | 1.03 | 0.27 | NM_199307.1 |  |
| scl000179.1_19  | 517   | 1.03 | 0.07 |             |  |
| Kctd6           | 395   | 1.03 | 0.11 | NM_027782.1 |  |
| Gltd1           | 560   | 1.03 | 0.07 |             |  |
| 4833442J19Rik   | 68    | 1.03 | 0.02 | NM_177101.2 |  |
| Vps16           | 1656  | 1.03 | 0.04 | NM_030559.2 |  |
| Cish            | 266   | 1.03 | 0.36 | NM_009895.2 |  |
| B430201A12Rik   | 215   | 1.03 | 0.33 | XM_283903.2 |  |
| Ehbp1           | 415   | 1.03 | 0.07 | NM_153078.1 |  |
| 2410011O22Rik   | 376   | 1.03 | 0.08 | NM_183133.1 |  |
| LOC269374       | 579   | 1.03 | 0.29 | XM_194043.3 |  |
| Dhx38           | 1304  | 1.03 | 0.10 |             |  |
| Phf14           | 45    | 1.03 | 0.28 |             |  |
| 4930504E06Rik   | 796   | 1.03 | 0.22 | NM_133858.2 |  |
| Cbx3            | 2411  | 1.03 | 0.08 | NM_007624   |  |
| Wbscr24         | 98    | 1.03 | 0.17 | NM_177574.1 |  |
| Recql4          | 89    | 1.03 | 0.15 | NM_058214.1 |  |
| C130072A16Rik   | 647   | 1.03 | 0.11 | AK081724    |  |
| Itga2b          | 80    | 1.03 | 0.21 | NM_010575.1 |  |
| Actn2           | 30    | 1.03 | 0.42 | NM_033268.2 |  |
| 4432405B04Rik   | 252   | 1.03 | 0.21 | NM_026486.1 |  |
| Gtf2e1          | 2697  | 1.03 | 0.18 | NM_028812.1 |  |
| Fbxo42          | 840   | 1.03 | 0.02 | NM_172518.2 |  |
| D130072O21Rik   | 3415  | 1.03 | 0.31 | NM_175322.2 |  |
| BC010584        | 191   | 1.03 | 0.26 | XM_110350.4 |  |
| Pum2            | 1015  | 1.03 | 0.11 | NM_030723.1 |  |
| A230050P20Rik   | 106   | 1.03 | 0.20 | NM_175687.1 |  |
| Mina            | 539   | 1.03 | 0.09 | NM_025910.2 |  |
| Tmem16g         | 109   | 1.03 | 0.13 |             |  |
| LOC231237       | 480   | 1.03 | 0.15 | XM_124516.2 |  |
| Alas1           | 5466  | 1.03 | 0.16 | NM_020559.1 |  |
| A430037M23Rik   | 60    | 1.03 | 0.33 | AK039975    |  |
| 4931406O17Rik   | 63    | 1.03 | 0.36 | XM_486260   |  |
| 2310042M24Rik   | 833   | 1.03 | 0.17 | NM_025868.1 |  |
| 9430067K09Rik   | 42    | 1.03 | 0.22 |             |  |
| Pdzk8           | 166   | 1.03 | 0.32 | XM_140761   |  |

|                |       |      |      |             |  |
|----------------|-------|------|------|-------------|--|
| Galnact2       | 31    | 1.03 | 0.44 | NM_030165.2 |  |
| 1110020K19Rik  | 1147  | 1.03 | 0.08 |             |  |
| Map3k12        | 286   | 1.03 | 0.09 | NM_009582.2 |  |
| LOC244710      | 629   | 1.03 | 0.27 | XM_146826.2 |  |
| Zfp94          | 810   | 1.03 | 0.06 | NM_009568.1 |  |
| Catnb          | 113   | 1.03 | 0.27 | NM_007614.2 |  |
| 4832412D13Rik  | 85    | 1.03 | 0.38 | AK076431    |  |
| Snapap         | 481   | 1.03 | 0.02 | NM_133854.2 |  |
| Rfxank         | 37    | 1.03 | 0.21 | NM_011266   |  |
| Zfp346         | 431   | 1.03 | 0.29 | NM_012017   |  |
| Styx           | 347   | 1.03 | 0.07 | NM_019637.2 |  |
| 2700063G02Rik  | 256   | 1.03 | 0.14 | NM_177047.2 |  |
| 2310047C21Rik  | 96    | 1.03 | 0.47 | AK040124    |  |
| 1600016N20Rik  | 393   | 1.03 | 0.10 | XM_146151.2 |  |
| BC050092       | 61    | 1.03 | 0.46 | NM_181419.2 |  |
| scl0004190.1_3 | 1398  | 1.03 | 0.10 |             |  |
| 5830430H09Rik  | 32    | 1.03 | 0.44 | AK020021    |  |
| lcmt           | 462   | 1.03 | 0.07 | NM_133788   |  |
| Limd1          | 585   | 1.03 | 0.28 | NM_013860.1 |  |
| Golph2         | 1686  | 1.03 | 0.10 | NM_027307   |  |
| 2310039E09Rik  | 124   | 1.03 | 0.12 | NM_026509.1 |  |
| Vhlh           | 641   | 1.03 | 0.03 | NM_009507   |  |
| 5730453H04Rik  | 1262  | 1.03 | 0.16 | NM_175338.2 |  |
| Mapkbp1        | 209   | 1.03 | 0.15 | NM_011941.1 |  |
| 1700009P13Rik  | 107   | 1.03 | 0.09 | NM_144820.1 |  |
| Speer8-ps1     | 41    | 1.03 | 0.16 | NR_001584.1 |  |
| Dnd1           | 162   | 1.03 | 0.28 | NM_173383.1 |  |
| Myh3           | 126   | 1.03 | 0.19 | XM_354614.1 |  |
| LOC381986      | 46    | 1.03 | 0.26 | XM_356036.1 |  |
| 3632413B07Rik  | 1873  | 1.03 | 0.11 | NM_027230   |  |
| Leprotl1       | 5070  | 1.03 | 0.21 | NM_026609.2 |  |
| 2010321M09Rik  | 1448  | 1.03 | 0.05 | NM_175153.2 |  |
| LOC238023      | 64    | 1.03 | 0.38 | XM_137923.4 |  |
| 4933430F16Rik  | 73    | 1.03 | 0.08 | AK016991    |  |
| Sgpp1          | 5302  | 1.03 | 0.30 | NM_030750.2 |  |
| Asns           | 13534 | 1.03 | 0.06 | NM_012055.1 |  |
| LOC381297      | 780   | 1.03 | 0.17 | XM_355238.1 |  |
| Cfl1           | 120   | 1.03 | 0.20 | NM_007687.2 |  |
| 1810073N04Rik  | 361   | 1.03 | 0.20 | NM_024249   |  |
| Anxa4          | 566   | 1.03 | 0.24 | NM_013471   |  |
| Rhpn1          | 70    | 1.03 | 0.23 | NM_008164   |  |
| E130001F20Rik  | 122   | 1.03 | 0.12 | AK087371    |  |
| Bcl2l1         | 293   | 1.03 | 0.50 | NM_009743.2 |  |
| LOC331336      | 50    | 1.03 | 0.38 | XM_285594.2 |  |
| LOC278147      | 243   | 1.03 | 0.12 | XM_203216.2 |  |
| Ppp2r5c        | 1491  | 1.03 | 0.07 | NM_012023   |  |
| 0610037P05Rik  | 84    | 1.03 | 0.08 | XM_148359.1 |  |
| Hook2          | 236   | 1.03 | 0.44 | NM_133255   |  |
| Bcdin3         | 102   | 1.03 | 0.36 |             |  |
| Panx1          | 100   | 1.03 | 0.19 | NM_019482.1 |  |
| Gna13          | 938   | 1.03 | 0.10 | NM_010303.2 |  |
| Dcun1d3        | 184   | 1.03 | 0.23 |             |  |
| 2310014D11Rik  | 33    | 1.03 | 0.23 |             |  |
| Cdkn1c         | 2768  | 1.03 | 0.16 | NM_009876.2 |  |
| 2210018M11Rik  | 2286  | 1.03 | 0.14 | XM_356003.1 |  |
| 9530077C05Rik  | 451   | 1.03 | 0.05 | NM_026739.1 |  |
| 1110003E12Rik  | 349   | 1.03 | 0.16 |             |  |
| D930042A21Rik  | 104   | 1.03 | 0.32 | AK086621    |  |
| 4732431J01Rik  | 41    | 1.03 | 0.41 | AK028672    |  |
| LOC232077      | 45    | 1.03 | 0.15 | XM_144880.1 |  |
| Tref1          | 82    | 1.03 | 0.20 | NM_172622.1 |  |
| C530047L02Rik  | 58    | 1.03 | 0.14 | AK049770    |  |
| Dffa           | 116   | 1.03 | 0.14 | NM_010044.1 |  |
| Ggnbp2         | 6167  | 1.03 | 0.12 | NM_153144.1 |  |
| Ltbp4          | 414   | 1.03 | 0.16 | NM_175641.1 |  |
| Stat5a         | 125   | 1.03 | 0.27 | NM_011488.2 |  |
| Amd2           | 956   | 1.03 | 0.22 | NM_007444   |  |
| Ttc19          | 567   | 1.03 | 0.09 | NM_028360.1 |  |

|                 |       |      |      |             |  |
|-----------------|-------|------|------|-------------|--|
| Usp5            | 825   | 1.03 | 0.16 | NM_013700.1 |  |
| Lck             | 400   | 1.03 | 0.11 | NM_010693.1 |  |
| Gmps            | 537   | 1.03 | 0.27 | XM_130877.3 |  |
| Nup133          | 639   | 1.03 | 0.08 | NM_172288.1 |  |
| Trmt1           | 1525  | 1.03 | 0.09 | NM_027296.1 |  |
| Zfp445          | 310   | 1.03 | 0.15 | NM_173364.3 |  |
| 5830417I10Rik   | 368   | 1.03 | 0.16 | XM_194592   |  |
| Atp6v0a2        | 344   | 1.03 | 0.05 | NM_011596   |  |
| Map3k11         | 1061  | 1.03 | 0.45 | NM_022012.2 |  |
| Itga3           | 1551  | 1.03 | 0.08 | NM_013565.2 |  |
| D630035D13Rik   | 123   | 1.03 | 0.24 | AK085493    |  |
| Lrrc50          | 50    | 1.03 | 0.20 |             |  |
| Rragb           | 3225  | 1.03 | 0.12 |             |  |
| 6430519M23Rik   | 52    | 1.03 | 0.42 | AK032318    |  |
| LOC227092       | 51    | 1.03 | 0.38 | XM_123660.2 |  |
| 2310047D13Rik   | 1004  | 1.03 | 0.14 | XM_282971   |  |
| 39699           | 506   | 1.03 | 0.11 |             |  |
| Ddx23           | 44    | 1.03 | 0.08 | XM_128190.3 |  |
| Pcdhb20         | 41    | 1.03 | 0.49 | NM_053145.1 |  |
| Hoxa4           | 66    | 1.03 | 0.28 | NM_008265.2 |  |
| LOC384387       | 44    | 1.03 | 0.41 | XM_357615.1 |  |
| LOC269859       | 3178  | 1.03 | 0.24 | XM_195629.1 |  |
| Wsb2            | 4687  | 1.03 | 0.08 | NM_021539.3 |  |
| A830073O21Rik   | 426   | 1.03 | 0.15 | NM_177118.2 |  |
| Snap23          | 460   | 1.03 | 0.18 | NM_009222.2 |  |
| 9130201F22Rik   | 941   | 1.03 | 0.12 | AK033610    |  |
| Golga3          | 602   | 1.03 | 0.18 | NM_008146.3 |  |
| Pi4k2a          | 1543  | 1.03 | 0.25 | NM_145501.1 |  |
| 2610024N24Rik   | 592   | 1.03 | 0.18 | XM_128698.5 |  |
| Atad4           | 964   | 1.03 | 0.30 |             |  |
| Pols            | 668   | 1.03 | 0.26 | NM_198600.1 |  |
| Set             | 120   | 1.03 | 0.20 | AK014291    |  |
| Raf1            | 873   | 1.03 | 0.09 | AK036317    |  |
| Acsl1           | 688   | 1.03 | 0.06 | NM_007981.2 |  |
| scl0002445.1_75 | 130   | 1.03 | 0.11 |             |  |
| A930034L06Rik   | 40    | 1.03 | 0.26 | NM_175692.2 |  |
| Tmed10          | 4520  | 1.03 | 0.26 |             |  |
| Mrp63           | 128   | 1.03 | 0.26 | NM_026401.1 |  |
| Rab21           | 818   | 1.03 | 0.15 | NM_024454.1 |  |
| E230008O15Rik   | 118   | 1.03 | 0.13 | AK053983    |  |
| D15Bwg0759e     | 109   | 1.03 | 0.37 |             |  |
| Gan             | 89    | 1.03 | 0.21 | XM_146539.4 |  |
| Zfp512          | 548   | 1.03 | 0.06 | NM_172993   |  |
| Zcchc12         | 360   | 1.03 | 0.04 | NM_028325.1 |  |
| A930004K21Rik   | 58    | 1.03 | 0.15 | NM_172673.1 |  |
| Lrrc29          | 93    | 1.03 | 0.24 | NM_177449   |  |
| 1700051112Rik   | 80    | 1.03 | 0.16 | XM_181390.2 |  |
| 2610019N13Rik   | 820   | 1.03 | 0.04 | AK011472    |  |
| Rab2            | 13877 | 1.03 | 0.07 | NM_021518.2 |  |
| Clk4            | 1472  | 1.03 | 0.10 | AK051099    |  |
| Pip5k1b         | 1206  | 1.03 | 0.13 | NM_008847.2 |  |
| Dhdds           | 107   | 1.03 | 0.04 | NM_026144.2 |  |
| Adrbk1          | 2631  | 1.03 | 0.22 | NM_130863   |  |
| Smyd5           | 437   | 1.03 | 0.06 | NM_144918.1 |  |
| Cables1         | 636   | 1.03 | 0.11 | NM_022021.1 |  |
| scl0002312.1_1  | 95    | 1.03 | 0.29 |             |  |
| Dll3            | 77    | 1.03 | 0.08 | NM_007866.1 |  |
| Grb2            | 76    | 1.03 | 0.09 | NM_008163.2 |  |
| Mmp2            | 306   | 1.03 | 0.09 | NM_008610.1 |  |
| 1110014L17Rik   | 2184  | 1.03 | 0.07 | NM_134020.1 |  |
| Gsk3a           | 158   | 1.03 | 0.45 |             |  |
| 9130207N01      | 463   | 1.03 | 0.48 | NM_177605.2 |  |
| 2310020P08Rik   | 88    | 1.03 | 0.25 | NM_027134.1 |  |
| Ccnb3           | 37    | 1.03 | 0.43 | NM_183015   |  |
| C230022P08Rik   | 51    | 1.03 | 0.10 | AK082204    |  |
| Gripap1         | 619   | 1.03 | 0.06 |             |  |
| Arl5b           | 48    | 1.03 | 0.25 |             |  |
| Tbcd            | 1869  | 1.03 | 0.15 |             |  |

|                 |      |      |      |             |  |
|-----------------|------|------|------|-------------|--|
| LOC242425       | 55   | 1.03 | 0.15 | XM_143750.3 |  |
| Ick             | 401  | 1.03 | 0.13 | NM_019987.1 |  |
| Syn1            | 2914 | 1.03 | 0.21 | NM_013680.1 |  |
| Sp2             | 37   | 1.03 | 0.66 | NM_030220   |  |
| Dhfr            | 47   | 1.03 | 0.53 | NM_010049   |  |
| Nr2f1           | 2077 | 1.03 | 0.11 | NM_010151.1 |  |
| Tmem32          | 890  | 1.03 | 0.20 | NM_146234.2 |  |
| Rxra            | 51   | 1.03 | 0.36 | NM_011305.2 |  |
| 2610002M06Rik   | 554  | 1.03 | 0.02 | NM_025921.1 |  |
| scl000309.1_341 | 30   | 1.03 | 0.41 |             |  |
| Tmc6            | 453  | 1.03 | 0.26 | NM_181321.2 |  |
| LOC380718       | 404  | 1.03 | 0.06 | XM_354636.1 |  |
| Al790326        | 310  | 1.03 | 0.08 | NM_134003   |  |
| A830062E06Rik   | 129  | 1.03 | 0.18 | AK043977    |  |
| Brf1            | 490  | 1.03 | 0.18 | NM_028193.1 |  |
| Narfl           | 37   | 1.03 | 0.11 | NM_026238.2 |  |
| Tmem150         | 50   | 1.03 | 0.12 |             |  |
| Kctd10          | 1789 | 1.03 | 0.04 | NM_026145.2 |  |
| Map2k7          | 118  | 1.03 | 0.20 | NM_011944.1 |  |
| B930096N04Rik   | 49   | 1.03 | 0.23 | AK047599    |  |
| LOC434459       | 139  | 1.03 | 0.24 |             |  |
| 2410004F06Rik   | 106  | 1.03 | 0.24 | NM_028034.1 |  |
| Ppp2cz          | 47   | 1.03 | 0.10 | NM_027982.1 |  |
| 2310002A08Rik   | 41   | 1.03 | 0.16 | AK049465    |  |
| Hc              | 90   | 1.03 | 0.08 | NM_010406.1 |  |
| Ppp3r1          | 1189 | 1.03 | 0.14 | NM_024459.1 |  |
| LOC381034       | 61   | 1.03 | 0.08 | XM_354943.1 |  |
| Mthfd2          | 8209 | 1.03 | 0.12 | NM_008638   |  |
| 1500005N04Rik   | 67   | 1.03 | 0.42 | AK005166    |  |
| 0610040J01Rik   | 320  | 1.03 | 0.18 | NM_029554.2 |  |
| Lgals9          | 88   | 1.03 | 0.28 | NM_010708   |  |
| 4933403L16Rik   | 140  | 1.03 | 0.21 | XM_205476.3 |  |
| Dctn4           | 2061 | 1.03 | 0.18 | NM_026302.2 |  |
| BC026778        | 55   | 1.03 | 0.29 | NM_198604.1 |  |
| 6330548O06Rik   | 641  | 1.03 | 0.20 | NM_172994.2 |  |
| Klk24           | 61   | 1.03 | 0.44 | NM_010643.1 |  |
| Fgd6            | 1385 | 1.03 | 0.23 | NM_053072   |  |
| Ap4m1           | 465  | 1.03 | 0.09 | NM_021392.2 |  |
| Stard6          | 213  | 1.03 | 0.14 | NM_029019.2 |  |
| 6530401I16Rik   | 104  | 1.03 | 0.34 | AK078333    |  |
| Plxna2          | 352  | 1.03 | 0.28 | NM_008882   |  |
| 9430010O03Rik   | 2440 | 1.03 | 0.04 | NM_176849   |  |
| Acsl6           | 207  | 1.03 | 0.07 | NM_144823.1 |  |
| Zfp99           | 985  | 1.03 | 0.17 | AK009842    |  |
| Pspc1           | 91   | 1.03 | 0.04 | NM_025682   |  |
| 2410127L17Rik   | 94   | 1.03 | 0.25 | NM_026120   |  |
| Fbxl8           | 136  | 1.03 | 0.26 | NM_015821.1 |  |
| 1200014P03Rik   | 331  | 1.03 | 0.32 | NM_029091.1 |  |
| Brap            | 155  | 1.03 | 0.26 | NM_028227.1 |  |
| Unc5a           | 136  | 1.03 | 0.32 | NM_153131.1 |  |
| Ovol2           | 92   | 1.03 | 0.20 |             |  |
| Ssbp2           | 521  | 1.02 | 0.13 | NM_024272.1 |  |
| Rsu1            | 91   | 1.02 | 0.45 | NM_009105   |  |
| D2Ert435e       | 183  | 1.02 | 0.40 | NM_153387   |  |
| Nktr            | 155  | 1.02 | 0.26 | AK088056    |  |
| Ddr2            | 52   | 1.02 | 0.19 | NM_022563.1 |  |
| 1300006N24Rik   | 510  | 1.02 | 0.23 | NM_027911.2 |  |
| Tmco4           | 43   | 1.02 | 0.10 |             |  |
| Cxx1c           | 61   | 1.02 | 0.29 |             |  |
| 4930563C04Rik   | 37   | 1.02 | 0.22 | AK016197    |  |
| 9630058C17Rik   | 37   | 1.02 | 0.37 | AK036326    |  |
| Hdac3           | 1415 | 1.02 | 0.16 | NM_010411.1 |  |
| LOC238321       | 51   | 1.02 | 0.26 | XM_138094.2 |  |
| Gps1            | 1181 | 1.02 | 0.12 | NM_145370.1 |  |
| Rnf144          | 58   | 1.02 | 0.36 | NM_080563.2 |  |
| Tmem49          | 421  | 1.02 | 0.07 |             |  |
| 2900052M09Rik   | 38   | 1.02 | 0.16 | AK028243    |  |
| C130002K18Rik   | 50   | 1.02 | 0.24 | XM_358371.1 |  |

|                 |       |      |      |             |  |
|-----------------|-------|------|------|-------------|--|
| 2310044G17Rik   | 1270  | 1.02 | 0.22 | NM_173735.2 |  |
| 4933408F15      | 35    | 1.02 | 0.31 | NM_172715.1 |  |
| Pip5k2c         | 4511  | 1.02 | 0.14 | NM_054097.2 |  |
| Napg            | 3411  | 1.02 | 0.21 | XM_355095   |  |
| Casp9           | 302   | 1.02 | 0.07 | AK085561    |  |
| 9930014A18Rik   | 225   | 1.02 | 0.18 | NM_177166.2 |  |
| Hcfc1           | 2689  | 1.02 | 0.12 | NM_008224.2 |  |
| Apba2bp         | 45    | 1.02 | 0.54 | NM_021546   |  |
| D330050B18Rik   | 99    | 1.02 | 0.40 | AK084830    |  |
| Crsp2           | 348   | 1.02 | 0.29 | NM_012005   |  |
| C130020C13Rik   | 329   | 1.02 | 0.14 |             |  |
| 2900054D09Rik   | 429   | 1.02 | 0.19 |             |  |
| Sox12           | 744   | 1.02 | 0.20 | NM_011438   |  |
| Fbxw7           | 276   | 1.02 | 0.01 | NM_080428   |  |
| 2310067E08Rik   | 553   | 1.02 | 0.29 | NM_028013.1 |  |
| Cugbp1          | 1512  | 1.02 | 0.08 | NM_198683.1 |  |
| 4732496O08Rik   | 1212  | 1.02 | 0.10 | NM_172877.1 |  |
| E130107N23Rik   | 2130  | 1.02 | 0.23 | NM_173038.1 |  |
| Nkiras2         | 1095  | 1.02 | 0.26 | NM_028024.1 |  |
| Nxf             | 36    | 1.02 | 0.45 | NM_153553.1 |  |
| Prrx2           | 38    | 1.02 | 0.56 | XM_149096.1 |  |
| G630013P12Rik   | 30    | 1.02 | 0.35 | XM_127501   |  |
| Drg1            | 916   | 1.02 | 0.04 | NM_007879.1 |  |
| scl0003608.1_34 | 115   | 1.02 | 0.48 |             |  |
| Gnas            | 1931  | 1.02 | 0.14 | NM_010310.1 |  |
| 1700030G05Rik   | 189   | 1.02 | 0.37 | AK006544    |  |
| 4933411K16Rik   | 43    | 1.02 | 0.40 |             |  |
| Fbxw2           | 154   | 1.02 | 0.04 | AK005103    |  |
| 2610207I05Rik   | 951   | 1.02 | 0.10 |             |  |
| 6030408B16Rik   | 40    | 1.02 | 0.11 | XM_358478.1 |  |
| Calr3           | 50    | 1.02 | 0.19 | NM_028500   |  |
| Zcchc8          | 1157  | 1.02 | 0.12 | NM_027494.1 |  |
| Abp1            | 63    | 1.02 | 0.47 | NM_029638.1 |  |
| Tra1            | 15378 | 1.02 | 0.10 | NM_011631.1 |  |
| Pitx2           | 154   | 1.02 | 0.08 | NM_011098.2 |  |
| Itsn1           | 456   | 1.02 | 0.01 | NM_010587   |  |
| Bid             | 386   | 1.02 | 0.15 | NM_007544.2 |  |
| E430021A19Rik   | 176   | 1.02 | 0.34 | AK088592    |  |
| 2610018O07Rik   | 701   | 1.02 | 0.27 |             |  |
| A730045A15Rik   | 1544  | 1.02 | 0.24 | AK042980    |  |
| LOC382010       | 613   | 1.02 | 0.06 | XM_356076.1 |  |
| Pum1            | 1241  | 1.02 | 0.15 | NM_030722.1 |  |
| Stim2           | 235   | 1.02 | 0.22 | XM_132038   |  |
| D11Lgp2e        | 104   | 1.02 | 0.18 | NM_030150   |  |
| 2310006J04Rik   | 978   | 1.02 | 0.27 | XM_134163.1 |  |
| Frap1           | 325   | 1.02 | 0.05 | AK036004    |  |
| Traf2           | 189   | 1.02 | 0.16 | NM_009422.1 |  |
| Plekhf2         | 803   | 1.02 | 0.11 | NM_175175.3 |  |
| Nck1            | 431   | 1.02 | 0.26 | NM_010878   |  |
| 1810007P19Rik   | 150   | 1.02 | 0.46 | NM_172701.1 |  |
| Dusp1           | 2854  | 1.02 | 0.12 | NM_013642.1 |  |
| 2310047K21Rik   | 684   | 1.02 | 0.17 | XM_488951   |  |
| Man1b           | 132   | 1.02 | 0.21 | NM_010763.1 |  |
| LOC432637       | 46    | 1.02 | 0.38 |             |  |
| 2210408O09Rik   | 133   | 1.02 | 0.14 | NM_028212.1 |  |
| Usp36           | 1242  | 1.02 | 0.26 | XM_126772.3 |  |
| Epc1            | 619   | 1.02 | 0.10 | NM_027497.1 |  |
| Phf10           | 4999  | 1.02 | 0.06 | NM_024250.3 |  |
| Pold3           | 1694  | 1.02 | 0.01 | NM_133692.1 |  |
| BC031601        | 3292  | 1.02 | 0.14 | XM_486265   |  |
| scl0004214.1_77 | 201   | 1.02 | 0.17 |             |  |
| Rccd1           | 87    | 1.02 | 0.19 |             |  |
| Fez2            | 323   | 1.02 | 0.14 | NM_199448.1 |  |
| B430202K04Rik   | 57    | 1.02 | 0.17 | AK046601    |  |
| 9330180L10Rik   | 1265  | 1.02 | 0.12 |             |  |
| C630049M13      | 90    | 1.02 | 0.56 | NM_172832.1 |  |
| Tmem176a        | 153   | 1.02 | 0.53 |             |  |
| Zmat2           | 64    | 1.02 | 0.18 | NM_025594.2 |  |



|                   |      |      |      |             |  |
|-------------------|------|------|------|-------------|--|
| 6430526N21Rik     | 82   | 1.02 | 0.14 | AK032361    |  |
| LOC381138         | 34   | 1.02 | 0.90 | XM_358512.1 |  |
| Mklin1            | 2109 | 1.02 | 0.13 | AK037967    |  |
| Senp5             | 182  | 1.02 | 0.16 | NM_177103.2 |  |
| Sdc2              | 1466 | 1.02 | 0.11 | NM_008304.1 |  |
| D19Wsu162e        | 3396 | 1.02 | 0.16 | NM_146099   |  |
| AI840980          | 250  | 1.02 | 0.44 | NM_153119.2 |  |
| LOC383036         | 159  | 1.02 | 0.23 | XM_356814.1 |  |
| Spaca4            | 50   | 1.02 | 0.06 |             |  |
| 4930555L03Rik     | 393  | 1.02 | 0.21 | XM_204030.1 |  |
| Hlf               | 67   | 1.02 | 0.22 | NM_172563.2 |  |
| D9Ert392e         | 1816 | 1.02 | 0.16 | NM_028181   |  |
| Ensa              | 454  | 1.02 | 0.10 | NM_019561   |  |
| Timeless          | 207  | 1.02 | 0.28 | NM_011589   |  |
| 2600002E23Rik     | 2509 | 1.02 | 0.18 | NM_026441.2 |  |
| Ddb2              | 153  | 1.02 | 0.14 | NM_028119.2 |  |
| LOC240053         | 59   | 1.02 | 0.17 | XM_139909.2 |  |
| Alg9              | 254  | 1.02 | 0.12 |             |  |
| LOC228730         | 2251 | 1.02 | 0.07 | XM_130476.4 |  |
| BC062185          | 734  | 1.02 | 0.07 | NM_199147.1 |  |
| Ap1g2             | 98   | 1.02 | 0.14 | NM_007455.1 |  |
| 9130202B12Rik     | 956  | 1.02 | 0.15 | AK033615    |  |
| Rsn               | 1562 | 1.02 | 0.12 | NM_019765.2 |  |
| Fto               | 993  | 1.02 | 0.09 | AK046935    |  |
| 2610019A05Rik     | 66   | 1.02 | 0.38 | NM_028126.1 |  |
| D15Ert366e        | 252  | 1.02 | 0.03 | NM_023063.1 |  |
| 2610033C09Rik     | 2051 | 1.02 | 0.20 | NM_026407.2 |  |
| Azi2              | 264  | 1.02 | 0.06 | AK013480    |  |
| gamma glutamyl tr | 33   | 1.02 | 0.28 |             |  |
| Osbp12            | 2787 | 1.02 | 0.14 | NM_144500.1 |  |
| 9530068E07Rik     | 2053 | 1.02 | 0.04 | XM_203329.2 |  |
| Tcf20             | 36   | 1.02 | 0.32 | NM_013836.2 |  |
| AI413414          | 104  | 1.02 | 0.30 | XM_134249.4 |  |
| Dicer1            | 696  | 1.02 | 0.11 | NM_148948.1 |  |
| Hps4              | 62   | 1.02 | 0.50 | NM_138646.2 |  |
| C130091E20        | 636  | 1.02 | 0.11 |             |  |
| Rbm10             | 281  | 1.02 | 0.17 | NM_145627   |  |
| A630014C11Rik     | 36   | 1.02 | 0.58 | AK041481    |  |
| Thap1             | 195  | 1.02 | 0.08 | NM_199042.1 |  |
| LOC381996         | 529  | 1.02 | 0.14 | XM_358686.1 |  |
| LOC383825         | 77   | 1.02 | 0.29 | XM_357279.1 |  |
| Bet1              | 91   | 1.02 | 0.34 | NM_009748.2 |  |
| Chst12            | 92   | 1.02 | 0.30 | NM_021528.2 |  |
| 2610529H08Rik     | 627  | 1.02 | 0.04 | AK016827    |  |
| Clip1             | 1328 | 1.02 | 0.07 |             |  |
| Bckdk             | 1108 | 1.02 | 0.16 | NM_009739.2 |  |
| Slc23a2           | 439  | 1.02 | 0.21 | NM_018824.2 |  |
| Aoc3              | 92   | 1.02 | 0.29 | AK040729    |  |
| C920011N12Rik     | 996  | 1.02 | 0.18 | AK050603    |  |
| 6330509M05Rik     | 1394 | 1.02 | 0.05 |             |  |
| Wdr68             | 7669 | 1.02 | 0.11 |             |  |
| Sh2b3             | 356  | 1.02 | 0.04 |             |  |
| Klk7              | 45   | 1.02 | 0.13 | NM_011872.2 |  |
| LOC381527         | 157  | 1.02 | 0.16 | XM_355488.1 |  |
| Trim44            | 111  | 1.02 | 0.20 | NM_020267.1 |  |
| Mkrn3             | 398  | 1.02 | 0.13 | NM_011746.1 |  |
| 1600012H06Rik     | 230  | 1.02 | 0.06 | NM_026451.1 |  |
| E030026I10Rik     | 3239 | 1.02 | 0.25 | NM_175553   |  |
| LOC381431         | 252  | 1.02 | 0.07 | XM_355389.1 |  |
| Fbxo18            | 370  | 1.02 | 0.22 | AK083118    |  |
| LOC384028         | 58   | 1.02 | 0.20 | XM_357379.1 |  |
| Tjap1             | 245  | 1.02 | 0.42 |             |  |
| Numbl             | 45   | 1.02 | 0.14 | NM_010950.1 |  |
| Smpd3             | 710  | 1.02 | 0.03 | NM_021491.2 |  |
| 1110054H05Rik     | 1141 | 1.02 | 0.04 | XM_126489   |  |
| Olf1437           | 56   | 1.02 | 0.33 |             |  |
| Nup205            | 9265 | 1.02 | 0.03 | XM_133073.4 |  |
| Hsf2              | 208  | 1.02 | 0.19 | AK053976    |  |

|                 |       |      |      |             |
|-----------------|-------|------|------|-------------|
| A230062G08Rik   | 862   | 1.02 | 0.28 | NM_173765.1 |
| 2900002H16Rik   | 165   | 1.02 | 0.21 | NM_021430.2 |
| 2610024A01Rik   | 52    | 1.02 | 0.45 | XM_129450.3 |
| D330001F17Rik   | 1805  | 1.02 | 0.23 | XM_283282.2 |
| Akr1c12         | 94    | 1.02 | 0.13 | NM_013777   |
| B830009D23Rik   | 661   | 1.02 | 0.08 | NM_175285.2 |
| LOC241322       | 75    | 1.02 | 0.43 | XM_140950.1 |
| Drctnnb1a       | 1891  | 1.02 | 0.19 | NM_053090   |
| MJ-8000-187_775 | 32    | 1.02 | 0.55 |             |
| Scfd1           | 390   | 1.02 | 0.27 | XM_126906.2 |
| Slc26a4         | 96    | 1.02 | 0.27 | NM_011867.1 |
| 4933417O08Rik   | 92    | 1.02 | 0.08 | XM_203553.3 |
| LOC233637       | 2513  | 1.02 | 0.15 | XM_133608.3 |
| Ddx18           | 4615  | 1.02 | 0.16 | NM_025860   |
| Oas1d           | 31    | 1.02 | 0.17 | NM_133893.1 |
| Narg2           | 155   | 1.02 | 0.34 | NM_145618.3 |
| Sema5b          | 118   | 1.02 | 0.30 | XM_147227.1 |
| Kras2           | 1939  | 1.02 | 0.19 | NM_021284   |
| Scamp1          | 12674 | 1.02 | 0.20 | XM_484305   |
| 9330177B18Rik   | 53    | 1.02 | 0.19 | AK020384    |
| 4930513D10Rik   | 31    | 1.02 | 0.34 | XM_142762   |
| LOC224087       | 1276  | 1.02 | 0.20 | XM_148700.4 |
| AA536749        | 458   | 1.02 | 0.10 | NM_201245.1 |
| Extl1           | 87    | 1.02 | 0.13 | NM_019578   |
| AL022832        | 14613 | 1.02 | 0.04 | NM_013916.1 |
| Adar            | 413   | 1.02 | 0.03 | NM_019655   |
| scl0003828.1_8  | 309   | 1.02 | 0.18 |             |
| 1810015C11Rik   | 715   | 1.02 | 0.11 |             |
| Gtf3c1          | 326   | 1.02 | 0.30 | XM_133826.5 |
| Sbno1           | 282   | 1.02 | 0.23 | XM_355637   |
| 1810020C02Rik   | 191   | 1.02 | 0.10 | AK007556    |
| Cbx2            | 744   | 1.02 | 0.29 | NM_007623.2 |
| Coro2b          | 173   | 1.02 | 0.35 | NM_175484.1 |
| BC004022        | 561   | 1.02 | 0.25 | XM_134557.1 |
| Stx17           | 201   | 1.02 | 0.03 | NM_026343   |
| 4833414E09Rik   | 159   | 1.02 | 0.42 | NM_027845.1 |
| 1110007C02Rik   | 1862  | 1.02 | 0.19 | NM_027923.1 |
| 1810057C19Rik   | 34    | 1.02 | 0.37 | NM_026433.1 |
| 2610101N10Rik   | 3510  | 1.02 | 0.20 | NM_026476.1 |
| Exosc10         | 738   | 1.02 | 0.12 | NM_016699.1 |
| Bid3            | 156   | 1.02 | 0.41 | NM_007545.1 |
| E430027N06Rik   | 1234  | 1.02 | 0.04 | AK088835    |
| Gylt1b          | 1979  | 1.02 | 0.10 | NM_172670.1 |
| Mtap2           | 600   | 1.02 | 0.20 | AK086484    |
| Pdhb            | 627   | 1.02 | 0.14 | AK084507    |
| 2010013H21Rik   | 44    | 1.02 | 0.38 | XM_128948.2 |
| C030026E19Rik   | 1512  | 1.02 | 0.04 |             |
| 4931415C17Rik   | 121   | 1.02 | 0.06 | AK088235    |
| Wrd43           | 601   | 1.02 | 0.17 | XM_484662   |
| Cherp           | 947   | 1.02 | 0.02 | NM_138585.2 |
| D2Erttd391e     | 638   | 1.02 | 0.29 | NM_145528.1 |
| Zfp398          | 111   | 1.02 | 0.03 | NM_027477   |
| Fgd2            | 1226  | 1.02 | 0.19 | NM_013710.1 |
| Figl1           | 1159  | 1.02 | 0.18 | NM_021891.2 |
| Gm111           | 105   | 1.02 | 0.36 | NM_207234.1 |
| Mat2a           | 3749  | 1.02 | 0.10 | NM_145569   |
| Al429613        | 83    | 1.02 | 0.06 | NM_134000.2 |
| Scamp5          | 717   | 1.02 | 0.20 | NM_020270.2 |
| Rab6            | 838   | 1.02 | 0.11 | BC019118    |
| LOC234413       | 89    | 1.02 | 0.24 | XM_134273.2 |
| Pcdhb6          | 99    | 1.02 | 0.21 | NM_053131   |
| Lin54           | 2551  | 1.02 | 0.26 |             |
| Slc39a11        | 3383  | 1.02 | 0.03 | NM_027216.2 |
| Inpp5e          | 99    | 1.02 | 0.03 | AK047245    |
| Elf2c2          | 217   | 1.02 | 0.23 | NM_153178.2 |
| scl0002759.1_7  | 669   | 1.02 | 0.10 |             |
| Nfyc            | 1768  | 1.02 | 0.06 | NM_008692.2 |
| Brd4            | 835   | 1.02 | 0.04 | NM_198094.1 |

|               |       |      |      |             |  |
|---------------|-------|------|------|-------------|--|
| D4Ertid432e   | 585   | 1.02 | 0.03 | XM_112612.3 |  |
| Csnk2a1       | 184   | 1.02 | 0.21 | NM_007788.2 |  |
| Crk7          | 48    | 1.02 | 0.33 | NM_026952.1 |  |
| Kdelr2        | 1228  | 1.02 | 0.20 | NM_025841.1 |  |
| Slc4a3        | 402   | 1.02 | 0.02 | NM_009208.1 |  |
| Ctns          | 246   | 1.02 | 0.17 | NM_031251.2 |  |
| Pde8a         | 710   | 1.02 | 0.18 | NM_008803.1 |  |
| A330066M24Rik | 140   | 1.02 | 0.52 | XM_355247.1 |  |
| Tcf25         | 3135  | 1.02 | 0.08 |             |  |
| Ptprn         | 226   | 1.02 | 0.20 | NM_008985.1 |  |
| Phf2          | 1192  | 1.02 | 0.31 | NM_172992.2 |  |
| Ap2m1         | 3345  | 1.02 | 0.17 | NM_009679.1 |  |
| B230205C01Rik | 275   | 1.02 | 0.18 | AK045461    |  |
| 2410014A08Rik | 449   | 1.01 | 0.08 | NM_175403.2 |  |
| Ncoa5         | 2082  | 1.01 | 0.14 | NM_144892.1 |  |
| Kbtbd9        | 59    | 1.01 | 0.21 | XM_126847.4 |  |
| Map2k5        | 197   | 1.01 | 0.17 | NM_011840.1 |  |
| Eif2s3x       | 2083  | 1.01 | 0.24 | NM_012010   |  |
| Gpr1          | 39    | 1.01 | 0.15 | NM_146250   |  |
| Yaf2          | 510   | 1.01 | 0.09 | NM_024189.4 |  |
| Nr2f6         | 626   | 1.01 | 0.14 | NM_010150.1 |  |
| LOC215090     | 372   | 1.01 | 0.11 | XM_112294.2 |  |
| Rnf14         | 1495  | 1.01 | 0.05 | NM_020012.1 |  |
| Fgl1          | 42    | 1.01 | 0.38 | NM_145594   |  |
| A730017D01Rik | 507   | 1.01 | 0.02 |             |  |
| Abi2          | 2891  | 1.01 | 0.16 | NM_198127.1 |  |
| C630002B14Rik | 163   | 1.01 | 0.10 | NM_175331.2 |  |
| Adpgk         | 88    | 1.01 | 0.13 | NM_028121.1 |  |
| Mdn1          | 441   | 1.01 | 0.23 | NM_133874.1 |  |
| 5730601F06Rik | 262   | 1.01 | 0.04 | XM_486197   |  |
| Zdhhc13       | 1547  | 1.01 | 0.15 | NM_028031.1 |  |
| Rab12         | 598   | 1.01 | 0.09 | NM_024448   |  |
| Stard5        | 997   | 1.01 | 0.06 | NM_023377.4 |  |
| 9630034F02Rik | 75    | 1.01 | 0.19 | AK079344    |  |
| BC024659      | 370   | 1.01 | 0.02 | XM_488673   |  |
| AI837181      | 169   | 1.01 | 0.33 | NM_134149.1 |  |
| LOC231663     | 104   | 1.01 | 0.36 | XM_124621.2 |  |
| Ask-pending   | 34    | 1.01 | 0.40 | AK083650    |  |
| A930101O15Rik | 60    | 1.01 | 0.29 | AK080758    |  |
| Nucb2         | 68    | 1.01 | 0.21 | NM_016773.1 |  |
| Stxbp5        | 624   | 1.01 | 0.19 | XM_125517   |  |
| BC016198      | 763   | 1.01 | 0.21 | NM_203507.1 |  |
| Wnt5b         | 30    | 1.01 | 0.64 | NM_009525.2 |  |
| Prmt6         | 334   | 1.01 | 0.15 |             |  |
| 1110036D12Rik | 58    | 1.01 | 0.28 |             |  |
| Hoxa2         | 55    | 1.01 | 0.09 | NM_010451.1 |  |
| Tmem170       | 97    | 1.01 | 0.15 |             |  |
| BC016608      | 88    | 1.01 | 0.42 | NM_146080.1 |  |
| Fip111        | 329   | 1.01 | 0.29 | NM_024183.3 |  |
| Fbxo25        | 2396  | 1.01 | 0.06 | NM_025785.1 |  |
| St7l          | 625   | 1.01 | 0.12 | NM_153091.2 |  |
| A630097K09Rik | 110   | 1.01 | 0.10 | AK042505    |  |
| 5830457O10Rik | 364   | 1.01 | 0.06 | NM_145412.2 |  |
| Psat1         | 6570  | 1.01 | 0.07 | XM_129211.2 |  |
| 2310047C04Rik | 91    | 1.01 | 0.14 | XM_358866   |  |
| Per2          | 245   | 1.01 | 0.07 | NM_011066.1 |  |
| Brpf1         | 1161  | 1.01 | 0.18 | NM_030178.1 |  |
| Chga          | 10297 | 1.01 | 0.12 | NM_007693.1 |  |
| Akap7         | 166   | 1.01 | 0.06 | NM_018747   |  |
| Pla2g2d       | 86    | 1.01 | 0.16 | NM_011109.1 |  |
| Lztr1         | 2800  | 1.01 | 0.11 | NM_025808.2 |  |
| Psm12         | 2773  | 1.01 | 0.04 | NM_025894.1 |  |
| D6Ertid365e   | 845   | 1.01 | 0.05 | NM_199143   |  |
| Mpp5          | 166   | 1.01 | 0.17 | NM_019579.1 |  |
| Vrk2          | 151   | 1.01 | 0.02 | NM_027260.1 |  |
| D830039C14Rik | 54    | 1.01 | 0.45 | AK052914    |  |
| Olf1500       | 45    | 1.01 | 0.52 |             |  |
| A730020E08Rik | 76    | 1.01 | 0.24 | XM_489138   |  |

|               |      |      |      |             |  |
|---------------|------|------|------|-------------|--|
| 9430097H08Rik | 525  | 1.01 | 0.17 | NM_153600.2 |  |
| 463141611Rik  | 52   | 1.01 | 0.50 | AK014523    |  |
| Slc38a1       | 77   | 1.01 | 0.24 | NM_134086.2 |  |
| 1700108N18Rik | 30   | 1.01 | 0.24 | AK007145    |  |
| Cenph         | 97   | 1.01 | 0.13 | AK011739    |  |
| LOC386263     | 35   | 1.01 | 0.26 | XM_359146.1 |  |
| D830027H13Rik | 88   | 1.01 | 0.15 | AK085906    |  |
| 2410024A21Rik | 2299 | 1.01 | 0.24 | NM_029654.3 |  |
| Slc39a9       | 387  | 1.01 | 0.06 | XM_484158   |  |
| LOC382190     | 186  | 1.01 | 0.11 | XM_356296.1 |  |
| 2310051D06Rik | 95   | 1.01 | 0.04 | NM_028009.1 |  |
| Tjp3          | 38   | 1.01 | 0.25 | NM_013769.1 |  |
| Tex10         | 471  | 1.01 | 0.02 | XM_485378   |  |
| Arhgef16      | 291  | 1.01 | 0.14 | XM_149562.4 |  |
| 5230400G24Rik | 629  | 1.01 | 0.08 | AK083056    |  |
| 2810011L19Rik | 53   | 1.01 | 0.13 |             |  |
| 0610037M15Rik | 89   | 1.01 | 0.14 |             |  |
| Ros1          | 41   | 1.01 | 0.55 | NM_011282.1 |  |
| Zfp629        | 218  | 1.01 | 0.17 | NM_177226.4 |  |
| A430033K04    | 64   | 1.01 | 0.18 | NM_183025.1 |  |
| Golph4        | 257  | 1.01 | 0.11 | NM_175193   |  |
| Jarid1c       | 73   | 1.01 | 0.26 | NM_013668   |  |
| BC059842      | 220  | 1.01 | 0.20 | NM_198170.2 |  |
| Plekhh1       | 1872 | 1.01 | 0.27 | XM_126961.4 |  |
| LOC383125     | 6786 | 1.01 | 0.13 | XM_356890.1 |  |
| Pygo1         | 61   | 1.01 | 0.16 | XM_134865.1 |  |
| Gpr30         | 4540 | 1.01 | 0.08 | XM_355659.1 |  |
| Ankhd1        | 515  | 1.01 | 0.11 |             |  |
| Fmr1          | 111  | 1.01 | 0.14 | NM_008031.1 |  |
| Cdc42bpa      | 267  | 1.01 | 0.25 | XM_283677.2 |  |
| 2810038K19Rik | 232  | 1.01 | 0.21 | NM_023684.1 |  |
| Adam23        | 131  | 1.01 | 0.16 | NM_011780.1 |  |
| B230114J08Rik | 1605 | 1.01 | 0.06 | NM_030018.2 |  |
| Zfp294        | 230  | 1.01 | 0.29 | XM_358881.1 |  |
| Narg1l        | 259  | 1.01 | 0.07 |             |  |
| LOC211832     | 44   | 1.01 | 0.41 | XM_139641.2 |  |
| Mmp24         | 1221 | 1.01 | 0.07 | NM_010808   |  |
| Wasl          | 5238 | 1.01 | 0.23 | XM_133026.3 |  |
| Stau1         | 1124 | 1.01 | 0.19 | NM_011490.1 |  |
| 4930538D17Rik | 493  | 1.01 | 0.44 | NM_029186.1 |  |
| LOC242459     | 78   | 1.01 | 0.12 | XM_143768.3 |  |
| Syt4          | 4930 | 1.01 | 0.10 | NM_009308   |  |
| Al593442      | 69   | 1.01 | 0.15 | NM_178906.2 |  |
| 6330417K15Rik | 765  | 1.01 | 0.11 |             |  |
| Nipsnap3b     | 311  | 1.01 | 0.20 | NM_025623.1 |  |
| Vps18         | 1414 | 1.01 | 0.03 | NM_172269.2 |  |
| 1700001C19Rik | 65   | 1.01 | 0.19 | XM_128669.1 |  |
| Srp54         | 495  | 1.01 | 0.14 | NM_011899.2 |  |
| 1110048D14Rik | 338  | 1.01 | 0.08 | NM_183120.1 |  |
| C130052I12Rik | 4157 | 1.01 | 0.10 | NM_146047.1 |  |
| 2310016G11Rik | 62   | 1.01 | 0.37 | XM_133426.3 |  |
| Gosr2         | 1157 | 1.01 | 0.04 | NM_019650.2 |  |
| Tagap         | 440  | 1.01 | 0.15 | NM_147155   |  |
| 2210016F16Rik | 120  | 1.01 | 0.16 | XM_354755.1 |  |
| Ezh2          | 858  | 1.01 | 0.02 | NM_007971.1 |  |
| 1110028E10Rik | 570  | 1.01 | 0.07 | NM_152808.1 |  |
| Fuk           | 122  | 1.01 | 0.09 | NM_172283.2 |  |
| Klk1b27       | 2401 | 1.01 | 0.29 |             |  |
| D130054A02Rik | 38   | 1.01 | 0.39 | AK051511    |  |
| OTTMUSG000000 | 41   | 1.01 | 0.24 |             |  |
| Rgs11         | 367  | 1.01 | 0.07 | XM_128488.3 |  |
| 9830163H01Rik | 39   | 1.01 | 0.65 |             |  |
| Rcor3         | 207  | 1.01 | 0.43 | NM_144814.1 |  |
| D14Ert500e    | 98   | 1.01 | 0.47 | NM_145462.1 |  |
| 4930429A08Rik | 156  | 1.01 | 0.08 | AK015229    |  |
| LOC219029     | 156  | 1.01 | 0.35 | XM_127694.5 |  |
| LOC215999     | 267  | 1.01 | 0.20 | XM_125687.3 |  |
| 4932442K08Rik | 215  | 1.01 | 0.19 | NM_024203.1 |  |

|                 |      |      |      |              |  |
|-----------------|------|------|------|--------------|--|
| scl0002223.1_98 | 49   | 1.01 | 0.12 |              |  |
| Eif3s8          | 2754 | 1.01 | 0.23 | NM_146200    |  |
| LOC383951       | 71   | 1.01 | 0.24 | XM_357344.1  |  |
| Dgcr2           | 1882 | 1.01 | 0.04 | NM_010048    |  |
| Padi1           | 1361 | 1.01 | 0.40 | NM_011059.1  |  |
| Cacna2d1        | 4622 | 1.01 | 0.05 | AK084101     |  |
| Rph3al          | 30   | 1.01 | 0.88 | NM_029548.1  |  |
| Parn            | 476  | 1.01 | 0.06 | AK041044     |  |
| Rtn3            | 3627 | 1.01 | 0.06 | NM_001003930 |  |
| Sall2           | 189  | 1.01 | 0.33 | NM_015772.1  |  |
| LOC381546       | 60   | 1.01 | 0.42 | XM_355512.1  |  |
| Iqce            | 690  | 1.01 | 0.10 | NM_028833    |  |
| Six4            | 64   | 1.01 | 0.30 | NM_011382.1  |  |
| 9330158N06Rik   | 284  | 1.01 | 0.21 | AK034130     |  |
| 4930488P06Rik   | 2071 | 1.01 | 0.16 | NM_178761.2  |  |
| Nek3            | 384  | 1.01 | 0.10 | NM_011848.1  |  |
| Tle1            | 435  | 1.01 | 0.17 | NM_011599.2  |  |
| Becn1           | 1283 | 1.01 | 0.03 | NM_019584.2  |  |
| Prkx            | 1121 | 1.01 | 0.16 | NM_016979.1  |  |
| 9330140G23      | 54   | 1.01 | 0.12 | NM_177647.2  |  |
| Skz1-pending    | 103  | 1.01 | 0.04 | AK050028     |  |
| C76566          | 87   | 1.01 | 0.09 | NM_178879.2  |  |
| Dnase111        | 74   | 1.01 | 0.20 | NM_027109.1  |  |
| Fin14           | 742  | 1.01 | 0.13 |              |  |
| 2310009E07Rik   | 202  | 1.01 | 0.35 | NM_027115.1  |  |
| 5930412E23Rik   | 1283 | 1.01 | 0.09 | NM_178632    |  |
| Dpp8            | 1143 | 1.01 | 0.06 | NM_028906.2  |  |
| Tob1            | 1951 | 1.01 | 0.07 | NM_009427.1  |  |
| Inpp5f          | 372  | 1.01 | 0.23 | BC067200     |  |
| 1810024B03Rik   | 32   | 1.01 | 0.22 | NM_198630.1  |  |
| B230333C21Rik   | 1083 | 1.01 | 0.22 | XM_111900    |  |
| Pip5kl1         | 34   | 1.01 | 0.22 | NM_198191.1  |  |
| Sf1             | 619  | 1.01 | 0.25 |              |  |
| A630026F21Rik   | 128  | 1.01 | 0.45 | NM_199025    |  |
| Gnat1           | 96   | 1.01 | 0.22 | NM_008140.2  |  |
| 6430587E11Rik   | 85   | 1.01 | 0.16 | AK032541     |  |
| 4930447C04Rik   | 48   | 1.01 | 0.77 | NM_029444.1  |  |
| B4galt6         | 174  | 1.01 | 0.07 | NM_019737.1  |  |
| DXImx39e        | 77   | 1.01 | 0.17 | XM_125370.1  |  |
| Aqr             | 273  | 1.01 | 0.26 | AK020468     |  |
| LOC270491       | 1034 | 1.01 | 0.40 | XM_194577.3  |  |
| Flii            | 326  | 1.01 | 0.23 |              |  |
| Cxcl13          | 55   | 1.01 | 0.71 | NM_018866.1  |  |
| BC013491        | 235  | 1.01 | 0.08 | XM_133435.2  |  |
| LOC382853       | 40   | 1.01 | 0.22 | XM_356711.1  |  |
| Rnf167          | 578  | 1.01 | 0.17 |              |  |
| Ubx3            | 349  | 1.01 | 0.22 | NM_178671.2  |  |
| Map2k4          | 1009 | 1.01 | 0.04 | NM_009157    |  |
| Aifm1           | 290  | 1.01 | 0.05 |              |  |
| Upf3b           | 31   | 1.01 | 0.07 | XM_110787.2  |  |
| Ccdc93          | 51   | 1.01 | 0.38 |              |  |
| Cdc16           | 2510 | 1.01 | 0.14 | NM_027276.1  |  |
| Zfp264          | 35   | 1.01 | 0.33 | XM_486050    |  |
| Elf2            | 151  | 1.01 | 0.18 | NM_023502.1  |  |
| LOC383249       | 2046 | 1.01 | 0.20 | XM_356944.1  |  |
| Rsf1            | 270  | 1.01 | 0.25 |              |  |
| Phf2            | 491  | 1.01 | 0.38 | NM_011078.2  |  |
| A830094I09Rik   | 198  | 1.01 | 0.11 | NM_177225.2  |  |
| Dnali1          | 44   | 1.01 | 0.31 | NM_175223.2  |  |
| F630107D10Rik   | 40   | 1.01 | 0.35 | AK089256     |  |
| AW061290        | 44   | 1.01 | 0.45 | NM_201361.1  |  |
| 0610040B21Rik   | 2556 | 1.01 | 0.17 | NM_025334.2  |  |
| Zfp93           | 107  | 1.01 | 0.07 | NM_009567.2  |  |
| Rnf148          | 68   | 1.01 | 0.41 |              |  |
| A330042I21Rik   | 36   | 1.01 | 0.52 |              |  |
| Myo1c           | 108  | 1.01 | 0.02 | NM_008659.2  |  |
| Grem2           | 32   | 1.01 | 0.43 | NM_011825.1  |  |
| Rgl3            | 78   | 1.01 | 0.18 | NM_023622.2  |  |

|                  |      |      |      |             |  |
|------------------|------|------|------|-------------|--|
| Ss18             | 997  | 1.01 | 0.08 | AK039430    |  |
| Gsk3b            | 1595 | 1.01 | 0.16 | NM_019827.2 |  |
| Sdh1             | 68   | 1.01 | 0.34 | NM_146126.1 |  |
| BC059177         | 218  | 1.01 | 0.23 | NM_198248   |  |
| 5830472H07Rik    | 35   | 1.01 | 0.44 | NM_175233.2 |  |
| Arhgap4          | 35   | 1.01 | 0.57 | NM_138630.1 |  |
| Neu2             | 123  | 1.01 | 0.09 | NM_015750.1 |  |
| Hmox1            | 85   | 1.01 | 0.73 | NM_010442.1 |  |
| AL022779         | 694  | 1.01 | 0.12 | XM_127436.3 |  |
| D11Ert603e       | 974  | 1.01 | 0.07 | NM_026023.3 |  |
| scl00001.1_0_RE\ | 394  | 1.01 | 0.15 |             |  |
| Hnrpu1           | 69   | 1.01 | 0.23 | NM_178089.2 |  |
| Rin1             | 55   | 1.01 | 0.10 | NM_145495.1 |  |
| BC039161         | 894  | 1.01 | 0.33 | XM_127719.4 |  |
| Ccndbp1          | 855  | 1.01 | 0.08 | NM_010761.1 |  |
| Zfp92            | 54   | 1.01 | 0.34 | NM_009566.1 |  |
| Fpgt             | 374  | 1.01 | 0.18 | XM_131241.3 |  |
| 2210013K02Rik    | 112  | 1.01 | 0.15 | NM_023712   |  |
| Zdhhc6           | 850  | 1.01 | 0.09 | NM_025883.2 |  |
| Smarce1          | 1719 | 1.01 | 0.13 | NM_020618.3 |  |
| B930063N02Rik    | 39   | 1.01 | 0.31 | AK047447    |  |
| D330037A14Rik    | 157  | 1.01 | 0.10 | NM_153537.3 |  |
| Adrb2            | 190  | 1.01 | 0.14 | NM_007420.2 |  |
| 1810013L24Rik    | 2256 | 1.01 | 0.09 | XM_148044.3 |  |
| 2310036I02Rik    | 492  | 1.01 | 0.06 | AK009650    |  |
| LOC383295        | 1385 | 1.01 | 0.01 | XM_356970.1 |  |
| Arfgef1          | 4974 | 1.01 | 0.16 | XM_129376.3 |  |
| LOC385021        | 37   | 1.01 | 0.21 | XM_357997.1 |  |
| A930015D01Rik    | 32   | 1.01 | 0.16 | AK044478    |  |
| 2700031B12Rik    | 6329 | 1.01 | 0.04 | AK012306    |  |
| E130302P19Rik    | 118  | 1.01 | 0.11 | AK087474    |  |
| LOC381640        | 205  | 1.00 | 0.26 | XM_355602.1 |  |
| Ndel1            | 2672 | 1.00 | 0.12 | NM_023668.1 |  |
| Eya3             | 208  | 1.00 | 0.10 | NM_010166.2 |  |
| Creg2            | 47   | 1.00 | 0.43 | NM_170597.2 |  |
| Pgcp             | 889  | 1.00 | 0.10 | NM_176073.2 |  |
| Tbp              | 446  | 1.00 | 0.03 | NM_013684   |  |
| Ap2a2            | 1010 | 1.00 | 0.08 | NM_007459.2 |  |
| D1Bwg0491e       | 2273 | 1.00 | 0.24 | NM_018872.1 |  |
| B930006L02Rik    | 236  | 1.00 | 0.19 | NM_178764.2 |  |
| Doc2b            | 79   | 1.00 | 0.04 | NM_007873.2 |  |
| Fbxo30           | 121  | 1.00 | 0.21 | XM_125493.4 |  |
| Ppp1r2           | 1987 | 1.00 | 0.04 | NM_025800.1 |  |
| Ctnn             | 159  | 1.00 | 0.17 | NM_007803.1 |  |
| Amigo            | 143  | 1.00 | 0.04 | NM_146137.1 |  |
| Ppp1r12c         | 86   | 1.00 | 0.09 | NM_029834.1 |  |
| C730026J16       | 1940 | 1.00 | 0.18 |             |  |
| 3110068G20Rik    | 897  | 1.00 | 0.12 |             |  |
| 2310004L02Rik    | 548  | 1.00 | 0.30 | NM_025504.2 |  |
| 2410004H02Rik    | 109  | 1.00 | 0.14 | NM_145954.1 |  |
| Rbm16            | 207  | 1.00 | 0.25 | NM_134123.2 |  |
| Nope             | 1270 | 1.00 | 0.07 | NM_020043.1 |  |
| Bfar             | 1320 | 1.00 | 0.03 | XM_148088.1 |  |
| Kif3a            | 1349 | 1.00 | 0.07 | NM_008443.2 |  |
| A930021H16Rik    | 113  | 1.00 | 0.11 | NM_174850.2 |  |
| D930015E06Rik    | 839  | 1.00 | 0.11 | NM_172681.2 |  |
| LOC245000        | 728  | 1.00 | 0.13 | XM_147046.2 |  |
| Paf1             | 349  | 1.00 | 0.19 |             |  |
| 2610001J05Rik    | 104  | 1.00 | 0.06 | NM_183258.1 |  |
| 4933407H13Rik    | 591  | 1.00 | 0.03 | AK030163    |  |
| 1810031K02Rik    | 2660 | 1.00 | 0.09 | NM_133716.2 |  |
| Ddi2             | 136  | 1.00 | 0.10 |             |  |
| D6Bwg1452e       | 63   | 1.00 | 0.34 | XM_143984   |  |
| Gnaz             | 669  | 1.00 | 0.18 |             |  |
| Qdpr             | 1742 | 1.00 | 0.23 | NM_024236.1 |  |
| B130040C13Rik    | 43   | 1.00 | 0.28 | AK045144    |  |
| 4833420G11Rik    | 1748 | 1.00 | 0.02 |             |  |
| Ubx1             | 413  | 1.00 | 0.15 | NM_024432.2 |  |

|                |      |      |      |             |  |
|----------------|------|------|------|-------------|--|
| Pldn           | 958  | 1.00 | 0.12 | NM_019788.2 |  |
| E2f3           | 119  | 1.00 | 0.23 | XM_127250   |  |
| 1810048J11Rik  | 125  | 1.00 | 0.04 | NM_026327   |  |
| Naglu          | 184  | 1.00 | 0.31 | AK044668    |  |
| Soat1          | 155  | 1.00 | 0.24 | NM_009230   |  |
| C130039O16Rik  | 43   | 1.00 | 0.32 | XM_138091.3 |  |
| Sh2bpsm1       | 544  | 1.00 | 0.31 | NM_011363.1 |  |
| Lig3           | 476  | 1.00 | 0.16 | AK010719    |  |
| Rnf12          | 409  | 1.00 | 0.36 | NM_011276.2 |  |
| C230074H09Rik  | 105  | 1.00 | 0.25 | AK048840    |  |
| Trpc2          | 170  | 1.00 | 0.24 | NM_011644.1 |  |
| 1200009B18Rik  | 1187 | 1.00 | 0.10 | NM_026168.1 |  |
| 3930401K13Rik  | 108  | 1.00 | 0.25 | NM_028720.1 |  |
| 1700052N19Rik  | 402  | 1.00 | 0.10 | NM_024261.1 |  |
| Pml            | 162  | 1.00 | 0.10 | NM_008884.2 |  |
| Slc7a3         | 2244 | 1.00 | 0.04 | NM_007515.1 |  |
| D930024H10Rik  | 46   | 1.00 | 0.26 | AK086373    |  |
| 4732493F09Rik  | 1644 | 1.00 | 0.12 | NM_178690.2 |  |
| 2810449K13Rik  | 37   | 1.00 | 0.12 | AK013314    |  |
| Dtnb           | 116  | 1.00 | 0.16 | AK085675    |  |
| 1110018J18Rik  | 139  | 1.00 | 0.15 | NM_025370.1 |  |
| D130047L08Rik  | 78   | 1.00 | 0.17 | AK051418    |  |
| Armc4          | 35   | 1.00 | 0.12 | XM_148860.2 |  |
| Eno3           | 122  | 1.00 | 0.17 | NM_007933.2 |  |
| E330031D07Rik  | 50   | 1.00 | 0.05 | AK054484    |  |
| Bat3           | 1928 | 1.00 | 0.07 | NM_057171   |  |
| Slc35a1        | 1687 | 1.00 | 0.05 | NM_011895.2 |  |
| 2810474O19Rik  | 149  | 1.00 | 0.08 | XM_132966.3 |  |
| Actn1          | 1604 | 1.00 | 0.39 |             |  |
| Mtbp           | 475  | 1.00 | 0.22 | NM_134092.2 |  |
| Pias3          | 150  | 1.00 | 0.11 | NM_146135.1 |  |
| Pxt1           | 97   | 1.00 | 0.18 | NM_153390.1 |  |
| Cerk           | 2551 | 1.00 | 0.14 | NM_145475   |  |
| Irak4          | 51   | 1.00 | 0.31 | NM_029926.3 |  |
| Trmt1          | 108  | 1.00 | 0.21 | NM_028063.1 |  |
| LOC386260      | 44   | 1.00 | 0.37 | XM_359144.1 |  |
| Osbp           | 160  | 1.00 | 0.12 | XM_148904   |  |
| Zc3hav1        | 60   | 1.00 | 0.65 | NM_028864.1 |  |
| Amfr           | 2236 | 1.00 | 0.26 | NM_011787.1 |  |
| Slc1a5         | 183  | 1.00 | 0.07 | NM_009201.1 |  |
| 4933425L03Rik  | 428  | 1.00 | 0.05 | XM_484121   |  |
| 1110008L16Rik  | 867  | 1.00 | 0.11 | XM_126928.4 |  |
| Sf4            | 2953 | 1.00 | 0.13 | NM_027481.1 |  |
| 9430088P09Rik  | 156  | 1.00 | 0.38 | AK035109    |  |
| AW060766       | 987  | 1.00 | 0.11 | NM_198033.1 |  |
| 9330177P18Rik  | 51   | 1.00 | 0.16 | AK034324    |  |
| Nesg1          | 116  | 1.00 | 0.22 | XM_355284.1 |  |
| 4933402K11Rik  | 42   | 1.00 | 0.38 | AK030155    |  |
| Slc39a6        | 6319 | 1.00 | 0.11 | NM_139143.1 |  |
| Vps45          | 637  | 1.00 | 0.08 | NM_013841.1 |  |
| Clk2           | 526  | 1.00 | 0.21 | NM_007712.1 |  |
| BC019731       | 1918 | 1.00 | 0.09 | NM_144914.2 |  |
| Lrrn2          | 77   | 1.00 | 0.45 | XM_136224.2 |  |
| C030004A17Rik  | 88   | 1.00 | 0.10 | NM_194257.1 |  |
| 1110037P11Rik  | 72   | 1.00 | 0.26 | XM_131077.2 |  |
| Trim39         | 1155 | 1.00 | 0.08 | NM_024468.1 |  |
| Hist1h4d       | 36   | 1.00 | 0.61 | NM_175654.1 |  |
| LOC380744      | 34   | 1.00 | 0.17 | XM_354658.1 |  |
| Fdps           | 4329 | 1.00 | 0.29 | NM_134469.2 |  |
| BC057079       | 1546 | 1.00 | 0.17 | XM_283973.2 |  |
| Rpo1-2         | 228  | 1.00 | 0.06 | AK052672    |  |
| Ywhae          | 385  | 1.00 | 0.06 | NM_009536.2 |  |
| scl0002000.1_2 | 35   | 1.00 | 0.54 |             |  |
| Zfp496         | 2375 | 1.00 | 0.08 | NM_172941   |  |
| Clcn7          | 468  | 1.00 | 0.04 | NM_011930.2 |  |
| Stac           | 66   | 1.00 | 0.08 | NM_016853.1 |  |
| Klk5           | 995  | 1.00 | 0.40 | NM_008456.1 |  |
| Smad9          | 53   | 1.00 | 0.27 | NM_019483   |  |

|                |      |      |      |             |  |
|----------------|------|------|------|-------------|--|
| Accn2          | 327  | 1.00 | 0.58 | NM_009597.1 |  |
| Cdc42se1       | 206  | 1.00 | 0.33 |             |  |
| Rbm5           | 2597 | 1.00 | 0.17 | NM_148930.2 |  |
| LOC381132      | 794  | 1.00 | 0.14 | XM_355049.1 |  |
| Rutbc1         | 105  | 1.00 | 0.35 | NM_197943.1 |  |
| A430038O04Rik  | 35   | 1.00 | 0.32 | AK039979    |  |
| 2310026J01Rik  | 44   | 1.00 | 0.14 | NM_177845   |  |
| LOC232787      | 131  | 1.00 | 0.02 | XM_133120.4 |  |
| Oact1          | 100  | 1.00 | 0.21 | NM_153546.1 |  |
| Bbs1           | 114  | 1.00 | 0.19 | XM_355129.1 |  |
| Pigh           | 232  | 1.00 | 0.15 | NM_029988.1 |  |
| Sin3b          | 889  | 1.00 | 0.13 | NM_009188.1 |  |
| AI467606       | 1571 | 1.00 | 0.21 | NM_178901.2 |  |
| MGC106740      | 1302 | 1.00 | 0.03 |             |  |
| Hsd3b2         | 211  | 1.00 | 0.07 | NM_153193.2 |  |
| A930008A22Rik  | 462  | 1.00 | 0.16 | NM_172768   |  |
| 2210009G21Rik  | 96   | 1.00 | 0.06 | NM_028834.1 |  |
| Trio           | 4015 | 1.00 | 0.10 |             |  |
| 4732495E13Rik  | 4482 | 1.00 | 0.17 | XM_128300.4 |  |
| LOC386082      | 309  | 1.00 | 0.14 | XM_359061.1 |  |
| Klf2           | 277  | 1.00 | 0.37 | NM_008452.1 |  |
| Ihpk1          | 1311 | 1.00 | 0.08 | NM_013785.2 |  |
| Kntc1          | 1486 | 1.00 | 0.19 | XM_132322.4 |  |
| Lmx1a          | 219  | 1.00 | 0.12 | NM_033652.2 |  |
| Frg1           | 44   | 1.00 | 0.43 | NM_013522.1 |  |
| Mttrr4         | 131  | 1.00 | 0.17 | NM_133215.1 |  |
| 1110060I01Rik  | 75   | 1.00 | 0.37 |             |  |
| LOC386218      | 1227 | 1.00 | 0.21 | XM_359123.1 |  |
| 2610528C06Rik  | 453  | 1.00 | 0.12 | AK012163    |  |
| Gstm1          | 142  | 1.00 | 0.16 | NM_010358.2 |  |
| Dcun1d2        | 429  | 1.00 | 0.20 |             |  |
| Fbxl2          | 159  | 1.00 | 0.05 | NM_178624   |  |
| Dnajc11        | 43   | 1.00 | 0.20 | NM_172704   |  |
| AI429612       | 921  | 1.00 | 0.16 | XM_128606.4 |  |
| Fbxl10         | 405  | 1.00 | 0.03 |             |  |
| Trp53inp1      | 3092 | 1.00 | 0.10 | NM_021897.1 |  |
| Klk6           | 3699 | 1.00 | 0.21 | NM_010639.5 |  |
| Nxf1           | 430  | 1.00 | 0.12 | NM_016813.2 |  |
| Zfp385         | 42   | 1.00 | 0.23 | NM_013866.1 |  |
| Plekha3        | 705  | 1.00 | 0.16 | NM_031256.2 |  |
| Sppl3          | 2565 | 1.00 | 0.19 | NM_029012.1 |  |
| 4931408A02Rik  | 60   | 1.00 | 0.16 | AK016443    |  |
| A930013G23Rik  | 85   | 1.00 | 0.23 | AK044444    |  |
| Vac14          | 190  | 1.00 | 0.03 |             |  |
| Nudcd3         | 93   | 1.00 | 0.27 |             |  |
| Slc2a1         | 5536 | 1.00 | 0.23 | NM_011400.1 |  |
| Eftud2         | 1786 | 1.00 | 0.08 |             |  |
| BC002199       | 3849 | 1.00 | 0.05 | NM_145964.1 |  |
| AF322649       | 325  | 1.00 | 0.05 | NM_153134.2 |  |
| Bms1l          | 225  | 1.00 | 0.27 | NM_194339.1 |  |
| Acox1          | 182  | 1.00 | 0.27 | NM_028765.1 |  |
| Atg5           | 1688 | 1.00 | 0.15 |             |  |
| C130023K05Rik  | 9462 | 1.00 | 0.13 | AK047958    |  |
| Hmg20a         | 100  | 1.00 | 0.08 | AK051678    |  |
| Rabgef1        | 3322 | 1.00 | 0.31 | NM_019983.2 |  |
| B130047N10Rik  | 39   | 1.00 | 0.42 | AK045211    |  |
| Xpo5           | 299  | 1.00 | 0.28 | NM_028198.1 |  |
| scl000338.1_51 | 526  | 1.00 | 0.37 |             |  |
| C730049P21     | 72   | 1.00 | 0.36 | NM_177800.2 |  |
| Il13ra1        | 440  | 1.00 | 0.27 | NM_133990.3 |  |
| Cacnb1         | 41   | 1.00 | 0.22 | NM_145121.1 |  |
| 2610312E17Rik  | 94   | 1.00 | 0.21 | AK012014    |  |
| Rufy1          | 466  | 1.00 | 0.10 | NM_172557.1 |  |
| Kptn           | 238  | 1.00 | 0.43 | NM_133727.1 |  |
| Fcgrt          | 32   | 1.00 | 0.17 | NM_010189   |  |
| A430107D22Rik  | 200  | 1.00 | 0.27 | NM_178785.2 |  |
| Isca1          | 1836 | 1.00 | 0.07 |             |  |
| Ebag9          | 123  | 1.00 | 0.14 | NM_019480.3 |  |



|               |       |      |      |             |  |
|---------------|-------|------|------|-------------|--|
| Rbpjl         | 48    | 1.00 | 0.21 |             |  |
| LOC211870     | 64    | 1.00 | 0.13 | XM_137113.4 |  |
| 5830415F09Rik | 93    | 1.00 | 0.36 | XM_131394.3 |  |
| Hars          | 41    | 1.00 | 0.11 | AK077437    |  |
| 1110029I05Rik | 742   | 1.00 | 0.36 |             |  |
| D630004N19Rik | 34    | 1.00 | 0.51 | NM_207274.1 |  |
| Nsg2          | 49    | 1.00 | 0.40 | AK049679    |  |
| 2900005I04Rik | 39    | 1.00 | 0.42 | XM_358388.1 |  |
| Cept1         | 586   | 1.00 | 0.12 | NM_133869.2 |  |
| Hip1r         | 286   | 1.00 | 0.13 | NM_145070.2 |  |
| 4930418P06Rik | 2410  | 1.00 | 0.10 | NM_029777.2 |  |
| D12Erd771e    | 741   | 1.00 | 0.17 | NM_028262.1 |  |
| D630043K02Rik | 40    | 1.00 | 0.23 | AK085580    |  |
| 2810453H10Rik | 71    | 1.00 | 0.27 | AK013337    |  |
| Dnajc10       | 1856  | 1.00 | 0.27 | NM_024181.1 |  |
| 5430411K18Rik | 452   | 1.00 | 0.10 | XM_140491.4 |  |
| Fgfr1op2      | 1028  | 1.00 | 0.25 | NM_026218.1 |  |
| Map2k1        | 306   | 1.00 | 0.24 | NM_008927.1 |  |
| AY078069      | 85    | 1.00 | 0.16 | NM_172142.1 |  |
| LOC239727     | 2410  | 1.00 | 0.20 | XM_156408.2 |  |
| Crkl          | 2239  | 1.00 | 0.14 | NM_007764   |  |
| Orm1          | 33    | 1.00 | 0.62 | NM_008768.1 |  |
| Rbbp5         | 391   | 1.00 | 0.11 | NM_172517   |  |
| Lace1         | 369   | 1.00 | 0.09 | NM_145743.1 |  |
| 4930422G04Rik | 173   | 1.00 | 0.24 | NM_197997.1 |  |
| 1110014K05Rik | 40    | 1.00 | 0.20 | NM_028622.1 |  |
| Sgcb          | 1395  | 1.00 | 0.11 | NM_011890.2 |  |
| Irf7          | 39    | 1.00 | 0.24 | NM_016850.1 |  |
| D130084E01Rik | 45    | 1.00 | 0.11 | AK084078    |  |
| Znrf1         | 115   | 1.00 | 0.15 | NM_133206.1 |  |
| A930010I20Rik | 40    | 1.00 | 0.29 | NM_177857   |  |
| Ncam1         | 61    | 1.00 | 0.16 | NM_010875   |  |
| B130020A07Rik | 216   | 1.00 | 0.18 | AK045021    |  |
| Chd1          | 329   | 1.00 | 0.21 | AK021188    |  |
| Prdm10        | 82    | 1.00 | 0.15 |             |  |
| 2410127E18Rik | 10658 | 1.00 | 0.16 | XM_133019   |  |
| Bckdha        | 1251  | 1.00 | 0.18 | NM_007533.2 |  |
| B930095G10Rik | 61    | 1.00 | 0.06 | AK047586    |  |
| Rps6ka2       | 255   | 1.00 | 0.19 | AK050996    |  |
| Nrp           | 651   | 1.00 | 0.03 | NM_008737.1 |  |
| LOC236533     | 56    | 1.00 | 0.21 | XM_143031.3 |  |
| Pparbp        | 237   | 1.00 | 0.30 | NM_013634.1 |  |
| AW107703      | 1508  | 1.00 | 0.03 | NM_198307.1 |  |
| Nxf7          | 643   | 1.00 | 0.53 | NM_130888.1 |  |
| D630036H09Rik | 675   | 1.00 | 0.03 | AK085516    |  |
| Tmem183a      | 966   | 1.00 | 0.10 |             |  |
| LOC380769     | 52    | 1.00 | 0.26 | XM_354682.1 |  |
| Trpv2         | 418   | 1.00 | 0.14 | NM_011706.1 |  |
| limk2b        | 59    | 1.00 | 0.25 | AB005132    |  |
| Sec23ip       | 202   | 1.00 | 0.41 | XM_133737.4 |  |
| Tlk2          | 1779  | 1.00 | 0.05 | NM_011903   |  |
| Ankrd54       | 648   | 1.00 | 0.09 |             |  |
| Tmem24        | 967   | 1.00 | 0.18 | XM_134795.3 |  |
| Nisch         | 4790  | 1.00 | 0.05 | AK004628    |  |
| Bcap29        | 2044  | 1.00 | 0.11 | NM_007530.2 |  |
| Morc3         | 3449  | 1.00 | 0.26 |             |  |
| Mvk           | 88    | 0.99 | 0.03 | NM_023556.2 |  |
| Fhl2          | 36    | 0.99 | 0.25 | NM_010212   |  |
| Tob2          | 184   | 0.99 | 0.32 | NM_020507   |  |
| Lrdd          | 197   | 0.99 | 0.11 | NM_022654.1 |  |
| Frag1         | 277   | 0.99 | 0.11 | NM_145583.1 |  |
| Apg7l         | 66    | 0.99 | 0.34 | NM_028835.1 |  |
| 6330414G02Rik | 3440  | 0.99 | 0.25 |             |  |
| Trpm7         | 31    | 0.99 | 0.31 | NM_021450.1 |  |
| Cdca7         | 5719  | 0.99 | 0.13 | NM_025866.1 |  |
| Zfp449        | 130   | 0.99 | 0.04 | NM_030139.1 |  |
| Slc41a2       | 944   | 0.99 | 0.14 | NM_177388.2 |  |
| Ubd           | 45    | 0.99 | 0.12 | NM_023137.2 |  |

|               |       |      |      |             |  |
|---------------|-------|------|------|-------------|--|
| Limk2         | 235   | 0.99 | 0.16 | NM_010718.1 |  |
| Sdcbp         | 2172  | 0.99 | 0.13 | NM_016807   |  |
| Spef1         | 96    | 0.99 | 0.11 |             |  |
| Kif3c         | 1249  | 0.99 | 0.18 | NM_008445.1 |  |
| Ipo9          | 3697  | 0.99 | 0.19 | XM_129442.3 |  |
| 2510049I19Rik | 47    | 0.99 | 0.25 | NM_026455.2 |  |
| Suv420h2      | 2269  | 0.99 | 0.13 | NM_146177.1 |  |
| Ankrd23       | 96    | 0.99 | 0.22 | NM_153502.2 |  |
| Bbx           | 1033  | 0.99 | 0.19 | BC066821    |  |
| A630052C17Rik | 231   | 0.99 | 0.20 | NM_177255.2 |  |
| Tubd1         | 177   | 0.99 | 0.05 | NM_019756   |  |
| Crif3         | 671   | 0.99 | 0.13 | NM_018776.1 |  |
| 2510001I10Rik | 431   | 0.99 | 0.10 | NM_178398   |  |
| Nol9          | 152   | 0.99 | 0.28 |             |  |
| Wins2         | 310   | 0.99 | 0.13 | NM_152815.1 |  |
| Prosapip1     | 377   | 0.99 | 0.32 | NM_197945.2 |  |
| Pabpc1        | 3361  | 0.99 | 0.14 | NM_008774.2 |  |
| Sel1l         | 540   | 0.99 | 0.17 |             |  |
| LOC383303     | 34    | 0.99 | 0.24 | XM_356974.1 |  |
| Cog4          | 191   | 0.99 | 0.24 | NM_133973.1 |  |
| 6430404H03Rik | 58    | 0.99 | 0.40 | AK078182    |  |
| Olfir748      | 92    | 0.99 | 0.14 |             |  |
| 5930404L04Rik | 37    | 0.99 | 0.20 | AK020027    |  |
| Gsta4         | 53    | 0.99 | 0.20 | NM_010357.1 |  |
| Crsp7         | 1240  | 0.99 | 0.12 | NM_027485.1 |  |
| LOC433801     | 52    | 0.99 | 0.46 |             |  |
| Arf2          | 2576  | 0.99 | 0.19 | NM_007477.2 |  |
| Ube2d2        | 8465  | 0.99 | 0.15 | NM_019912.1 |  |
| Adcy6         | 49    | 0.99 | 0.08 | NM_007405.1 |  |
| Foxj2         | 392   | 0.99 | 0.18 | NM_021899.2 |  |
| Ppp4r1        | 2139  | 0.99 | 0.06 | NM_146081.1 |  |
| Mll5          | 1130  | 0.99 | 0.17 | XM_485570   |  |
| Phactr4       | 3085  | 0.99 | 0.11 | NM_175306.2 |  |
| F730014I05Rik | 286   | 0.99 | 0.17 | NM_146129.2 |  |
| Sez6          | 49    | 0.99 | 0.16 | AK032277    |  |
| AW212394      | 3395  | 0.99 | 0.16 | NM_133829   |  |
| Eif1a         | 5558  | 0.99 | 0.15 | NM_010120.3 |  |
| LOC217246     | 150   | 0.99 | 0.20 | XM_110936.3 |  |
| 4930577N17Rik | 36    | 0.99 | 0.59 |             |  |
| 3632431M01Rik | 270   | 0.99 | 0.24 | XM_132843   |  |
| 0610005I04    | 31    | 0.99 | 0.14 | NM_177579.2 |  |
| Ccnc          | 847   | 0.99 | 0.06 | AK009615    |  |
| LOC383907     | 67    | 0.99 | 0.13 | XM_357317.1 |  |
| Foxk1         | 73    | 0.99 | 0.32 | NM_199068.1 |  |
| Chordc1       | 2833  | 0.99 | 0.22 | NM_025844.1 |  |
| LOC383483     | 517   | 0.99 | 0.10 | XM_357088.1 |  |
| C030003J12Rik | 44    | 0.99 | 0.11 | XM_131233.5 |  |
| 2700033K02Rik | 49    | 0.99 | 0.28 | NM_183261.1 |  |
| Lbcl1         | 715   | 0.99 | 0.15 | AK035683    |  |
| Cd164         | 19917 | 0.99 | 0.27 | NM_016898.1 |  |
| 2210013I18Rik | 83    | 0.99 | 0.40 | XM_150116.1 |  |
| 2900036G02Rik | 414   | 0.99 | 0.10 | XM_358311.1 |  |
| Cdc42bpb      | 2407  | 0.99 | 0.18 | NM_183016.1 |  |
| Hyal3         | 33    | 0.99 | 0.24 | NM_178020.2 |  |
| E130308C19Rik | 229   | 0.99 | 0.05 | XM_139378.3 |  |
| B230209E15Rik | 5307  | 0.99 | 0.38 | XM_489182   |  |
| 9430090I01Rik | 99    | 0.99 | 0.46 | AK079154    |  |
| D8Erttd354e   | 1277  | 0.99 | 0.24 | NM_133970   |  |
| Wdr70         | 109   | 0.99 | 0.44 |             |  |
| 2310037I24Rik | 1893  | 0.99 | 0.08 | NM_133714.2 |  |
| Actr5         | 348   | 0.99 | 0.23 | NM_175419.3 |  |
| D8Erttd319e   | 291   | 0.99 | 0.08 | NM_026792.2 |  |
| Ylpm1         | 584   | 0.99 | 0.23 | NM_178363.2 |  |
| Stk35         | 96    | 0.99 | 0.19 | NM_183262.1 |  |
| 1700019G17Rik | 89    | 0.99 | 0.10 | NM_029331.2 |  |
| Usp54         | 531   | 0.99 | 0.17 | NM_030180.1 |  |
| LOC329394     | 32    | 0.99 | 0.08 | XM_283726.2 |  |
| AI597468      | 1174  | 0.99 | 0.10 |             |  |

|                  |       |      |      |             |  |
|------------------|-------|------|------|-------------|--|
| BC003498         | 119   | 0.99 | 0.28 | NM_030263.2 |  |
| Ncaph            | 2847  | 0.99 | 0.07 |             |  |
| Nvl              | 401   | 0.99 | 0.13 | NM_026171.1 |  |
| Mapk1ip1         | 828   | 0.99 | 0.29 |             |  |
| LOC382814        | 63    | 0.99 | 0.27 | XM_358731.1 |  |
| Tmem2            | 524   | 0.99 | 0.18 | NM_031997.2 |  |
| Smad5            | 189   | 0.99 | 0.19 | NM_008541.2 |  |
| Tnfaip3          | 119   | 0.99 | 0.22 | NM_009397.2 |  |
| Trak1            | 493   | 0.99 | 0.13 |             |  |
| Tmem8            | 420   | 0.99 | 0.02 | NM_021793.1 |  |
| Olfrl1390        | 39    | 0.99 | 0.28 |             |  |
| Rtn4r            | 33    | 0.99 | 0.32 | NM_022982.1 |  |
| Tarbp2           | 302   | 0.99 | 0.36 | NM_009319.1 |  |
| 4933427L07Rik    | 2862  | 0.99 | 0.08 | NM_027727.1 |  |
| Mcm3             | 3499  | 0.99 | 0.17 | NM_008563.1 |  |
| Orc2l            | 116   | 0.99 | 0.12 | NM_008765.2 |  |
| D10Ert610e       | 498   | 0.99 | 0.13 | NM_028027.1 |  |
| B430315C20Rik    | 301   | 0.99 | 0.27 | NM_178795.3 |  |
| 4732488M06Rik    | 53    | 0.99 | 0.24 | AK029073    |  |
| A830007P12Rik    | 55    | 0.99 | 0.34 | NM_146115.2 |  |
| Mst1             | 33    | 0.99 | 0.52 | NM_008243.2 |  |
| 1810038L18Rik    | 3355  | 0.99 | 0.20 | XM_483957   |  |
| Slc12a7          | 67    | 0.99 | 0.22 | AK052910    |  |
| Dnaic1           | 135   | 0.99 | 0.19 | NM_175138.2 |  |
| Arih2            | 851   | 0.99 | 0.28 | NM_011790.2 |  |
| Mbp              | 1191  | 0.99 | 0.04 | NM_010777.1 |  |
| BC027061         | 865   | 0.99 | 0.18 | NM_183165   |  |
| Anks6            | 347   | 0.99 | 0.32 |             |  |
| C030048B08Rik    | 849   | 0.99 | 0.09 | NM_172991.2 |  |
| Dclre1b          | 352   | 0.99 | 0.15 | NM_133865   |  |
| LOC386117        | 90    | 0.99 | 0.06 | XM_359075.1 |  |
| Ankrd7           | 45    | 0.99 | 0.30 |             |  |
| 1300013D05Rik    | 80    | 0.99 | 0.28 | NM_026186   |  |
| Pawr             | 554   | 0.99 | 0.05 | XM_125814.2 |  |
| Gramd2           | 37    | 0.99 | 0.21 |             |  |
| Rrm1             | 1381  | 0.99 | 0.20 | AK049601    |  |
| 5330408N05Rik    | 203   | 0.99 | 0.16 | AK030411    |  |
| Dnajc12          | 972   | 0.99 | 0.24 | NM_013888.1 |  |
| 5530401J07Rik    | 1507  | 0.99 | 0.36 |             |  |
| 2010005J08Rik    | 149   | 0.99 | 0.12 | NM_178623.2 |  |
| Hbs1l            | 1975  | 0.99 | 0.08 | NM_019702   |  |
| scl0001946.1_187 | 75    | 0.99 | 0.04 |             |  |
| Snag1            | 1345  | 0.99 | 0.21 | NM_130796.1 |  |
| D430002C13Rik    | 206   | 0.99 | 0.12 | AK052398    |  |
| Hp1bp3           | 11442 | 0.99 | 0.14 | NM_010470.1 |  |
| Ent2             | 37    | 0.99 | 0.28 | AF183397    |  |
| Stk17b           | 1326  | 0.99 | 0.24 | NM_133810.2 |  |
| Sypl             | 1829  | 0.99 | 0.04 | NM_013635.2 |  |
| Rnf10            | 2603  | 0.99 | 0.29 | NM_016698   |  |
| 9930116P15Rik    | 2305  | 0.99 | 0.27 | XM_127961.3 |  |
| Igsf8            | 94    | 0.99 | 0.13 | NM_080419.1 |  |
| 2700050L05Rik    | 167   | 0.99 | 0.07 | NM_178115.2 |  |
| C330008I15Rik    | 111   | 0.99 | 0.20 | NM_144917.2 |  |
| 2700094F01Rik    | 663   | 0.99 | 0.09 | NM_178625.3 |  |
| Parp8            | 137   | 0.99 | 0.31 | NM_027272.3 |  |
| Hes6             | 2624  | 0.99 | 0.20 | NM_019479.2 |  |
| Cpm              | 622   | 0.99 | 0.18 | XM_125830.3 |  |
| Hn1l             | 1242  | 0.99 | 0.09 |             |  |
| Copa             | 3617  | 0.99 | 0.13 | NM_009938.2 |  |
| Klf7             | 4348  | 0.99 | 0.13 | NM_033563   |  |
| 4631423B10Rik    | 121   | 0.99 | 0.26 | NM_175422.2 |  |
| Trub2            | 5366  | 0.99 | 0.06 |             |  |
| Zfp422-rs1       | 113   | 0.99 | 0.26 | NM_029952.2 |  |
| Ager             | 40    | 0.99 | 0.53 | NM_007425.1 |  |
| A430083B19Rik    | 32    | 0.99 | 0.16 | NM_177624.2 |  |
| Sp8              | 222   | 0.99 | 0.13 | NM_177082.3 |  |
| Pnpla1           | 70    | 0.99 | 0.29 |             |  |
| Atf7ip           | 572   | 0.99 | 0.13 | NM_175182.2 |  |

|                |      |      |      |             |  |
|----------------|------|------|------|-------------|--|
| Rnh2           | 67   | 0.99 | 0.34 | NM_031389.1 |  |
| Top3b          | 491  | 0.99 | 0.04 | NM_011624.2 |  |
| Oc90           | 82   | 0.99 | 0.09 | NM_010953.1 |  |
| Pard3b         | 31   | 0.99 | 0.30 |             |  |
| Tmem30b        | 180  | 0.99 | 0.45 | NM_178715.2 |  |
| Stab2          | 179  | 0.99 | 0.24 | NM_138673.1 |  |
| AI842396       | 71   | 0.99 | 0.09 | XM_147543.4 |  |
| 4930506M07Rik  | 98   | 0.99 | 0.30 | BC030338    |  |
| Pet112l        | 420  | 0.99 | 0.04 | NM_144896.2 |  |
| Slc9a8         | 227  | 0.99 | 0.12 | NM_148929.2 |  |
| 1700054N08Rik  | 312  | 0.99 | 0.04 | XM_134542.2 |  |
| Stat1          | 340  | 0.99 | 0.11 | NM_009283.2 |  |
| Dhx33          | 660  | 0.99 | 0.18 | NM_178367.3 |  |
| Zfp238         | 1250 | 0.99 | 0.12 | NM_013915.1 |  |
| Kcmf1          | 648  | 0.99 | 0.30 | NM_019715.1 |  |
| LOC545007      | 1735 | 0.99 | 0.17 |             |  |
| D030049N18Rik  | 153  | 0.99 | 0.09 | AK050983    |  |
| 4121402D02Rik  | 503  | 0.99 | 0.21 | NM_028722.1 |  |
| 1810013C15Rik  | 199  | 0.99 | 0.14 |             |  |
| LOC384359      | 41   | 0.99 | 0.38 | XM_357597.1 |  |
| A230078H02Rik  | 78   | 0.99 | 0.22 | AK038954    |  |
| Panx3          | 136  | 0.99 | 0.13 | NM_172454.1 |  |
| Sqrdl          | 340  | 0.99 | 0.11 | NM_021507.4 |  |
| BC017643       | 833  | 0.99 | 0.05 | NM_144832.1 |  |
| Rfx2           | 819  | 0.99 | 0.02 | NM_009056.1 |  |
| Cdc42          | 269  | 0.99 | 0.06 | NM_009861   |  |
| 9630011N22Rik  | 40   | 0.99 | 0.12 | NM_177252.2 |  |
| Apoc2          | 45   | 0.99 | 0.14 | NM_009695.2 |  |
| Mib1           | 353  | 0.99 | 0.24 | NM_144860.2 |  |
| 1500041J02Rik  | 92   | 0.99 | 0.08 | NM_026424   |  |
| Lrrc20         | 298  | 0.99 | 0.12 | NM_153542.1 |  |
| Ganab          | 1341 | 0.99 | 0.08 | NM_008060.1 |  |
| Hdac7a         | 142  | 0.99 | 0.12 | NM_019572.2 |  |
| C330001K17Rik  | 68   | 0.99 | 0.20 | AK021166    |  |
| Sos1           | 75   | 0.99 | 0.26 | NM_009231.1 |  |
| Krtap5-1       | 77   | 0.99 | 0.24 | NM_015808   |  |
| 9030605E16Rik  | 50   | 0.99 | 0.40 | NM_029417.1 |  |
| LOC226864      | 78   | 0.99 | 0.08 | XM_136530.2 |  |
| Rims3          | 1673 | 0.99 | 0.27 | NM_182929   |  |
| Sec15l2        | 964  | 0.99 | 0.12 | XM_355790.1 |  |
| D330037H01Rik  | 34   | 0.99 | 0.40 | AK052357    |  |
| LOC380679      | 43   | 0.99 | 0.61 | XM_354589.1 |  |
| Rnf134         | 1641 | 0.99 | 0.09 | NM_027654.1 |  |
| 1810043J12Rik  | 1373 | 0.99 | 0.06 | NM_028067.1 |  |
| Npn1           | 34   | 0.99 | 0.04 | NM_021276   |  |
| Clp1           | 862  | 0.99 | 0.09 | NM_138753.1 |  |
| Havcr1         | 46   | 0.99 | 0.36 | NM_134248.1 |  |
| Gnpat          | 523  | 0.99 | 0.11 | NM_010322.2 |  |
| Tuba7          | 282  | 0.99 | 0.29 | NM_009449.2 |  |
| Stk4           | 1280 | 0.99 | 0.11 | NM_021420.2 |  |
| Ttyh3          | 426  | 0.99 | 0.12 | NM_175274.2 |  |
| ORF28          | 346  | 0.99 | 0.13 | NM_138664   |  |
| Gnpda1         | 346  | 0.99 | 0.19 | NM_011937   |  |
| LOC384008      | 73   | 0.99 | 0.27 | XM_131339.3 |  |
| AA673488       | 709  | 0.99 | 0.10 | XM_133935.5 |  |
| scl0002116.1_6 | 112  | 0.99 | 0.13 |             |  |
| Lzts2          | 1049 | 0.99 | 0.29 | NM_145503.1 |  |
| 4732466D17Rik  | 34   | 0.99 | 0.41 | XM_129420.4 |  |
| Ppard          | 629  | 0.99 | 0.24 | NM_011145.1 |  |
| 9530095N04Rik  | 65   | 0.99 | 0.14 | AK079300    |  |
| LOC384348      | 2495 | 0.99 | 0.23 | XM_357593.1 |  |
| LOC242051      | 4269 | 0.99 | 0.13 | XM_143255.3 |  |
| LOC225927      | 533  | 0.99 | 0.03 | XM_129198.4 |  |
| 1810033B17Rik  | 57   | 0.99 | 0.23 | XM_110690.2 |  |
| Dlg3           | 323  | 0.99 | 0.20 |             |  |
| LOC224055      | 393  | 0.99 | 0.06 | XM_155900.3 |  |
| Npr2           | 1059 | 0.99 | 0.07 | NM_173788.2 |  |
| Zfp709         | 68   | 0.99 | 0.22 |             |  |

|                |       |      |      |             |  |
|----------------|-------|------|------|-------------|--|
| Sephs2         | 1314  | 0.99 | 0.07 | NM_009266.1 |  |
| Mecp2          | 945   | 0.99 | 0.07 | NM_010788.1 |  |
| Pigl           | 121   | 0.99 | 0.20 | NM_199026.1 |  |
| G6pc           | 59    | 0.99 | 0.21 | NM_008061.2 |  |
| C030003D03Rik  | 56    | 0.99 | 0.33 | XM_282904.2 |  |
| Set7           | 213   | 0.98 | 0.08 | NM_080793   |  |
| Snx2           | 4433  | 0.98 | 0.17 | NM_026386   |  |
| A630054L15Rik  | 490   | 0.98 | 0.22 | NM_145969   |  |
| Gnpda2         | 438   | 0.98 | 0.12 | NM_027681   |  |
| Pdcd11         | 146   | 0.98 | 0.12 | NM_011053   |  |
| Gns            | 2596  | 0.98 | 0.17 | NM_029364.1 |  |
| A230005G17Rik  | 36    | 0.98 | 0.12 | AK038411    |  |
| Yod1           | 511   | 0.98 | 0.10 |             |  |
| LOC280487      | 25184 | 0.98 | 0.10 | XM_203701.3 |  |
| 2600005O03Rik  | 49    | 0.98 | 0.54 | NM_183089.1 |  |
| Tex2           | 411   | 0.98 | 0.06 | NM_198292.2 |  |
| Tnpo3          | 763   | 0.98 | 0.16 | NM_177296   |  |
| Tiam1          | 3940  | 0.98 | 0.16 | NM_009384.1 |  |
| D130064H19Rik  | 935   | 0.98 | 0.19 | NM_172593.1 |  |
| Cmpk           | 1496  | 0.98 | 0.44 |             |  |
| D430022H17Rik  | 1309  | 0.98 | 0.19 | AK084998    |  |
| Mboat5         | 1186  | 0.98 | 0.16 |             |  |
| 4930445I03Rik  | 68    | 0.98 | 0.09 | AK015391    |  |
| OTTMUSG000000  | 44    | 0.98 | 0.12 |             |  |
| Nfx1           | 181   | 0.98 | 0.13 | NM_023739.2 |  |
| Dutp           | 636   | 0.98 | 0.35 | NM_023595.3 |  |
| 4931433E08Rik  | 1720  | 0.98 | 0.27 | XM_484765   |  |
| Mtssk          | 42    | 0.98 | 0.55 | AK086418    |  |
| Neurl          | 6903  | 0.98 | 0.22 | AK046382    |  |
| Ghrh           | 99    | 0.98 | 0.03 | NM_010285.1 |  |
| D330001F19Rik  | 105   | 0.98 | 0.26 | AK052154    |  |
| LOC386123      | 126   | 0.98 | 0.30 | XM_359079.1 |  |
| Bnip2          | 227   | 0.98 | 0.05 | AK014659    |  |
| Serpinb6a      | 169   | 0.98 | 0.56 | NM_009254   |  |
| C230096C10Rik  | 61    | 0.98 | 0.16 | NM_146157.2 |  |
| Txndc9         | 163   | 0.98 | 0.31 | NM_172054.2 |  |
| LOC386254      | 35    | 0.98 | 0.20 | XM_359141.1 |  |
| Pscd1          | 175   | 0.98 | 0.17 | AK078502    |  |
| Ppapdc1        | 536   | 0.98 | 0.05 | XM_134059.2 |  |
| Artn           | 61    | 0.98 | 0.18 | NM_009711.2 |  |
| LOC385659      | 330   | 0.98 | 0.18 | XM_358862.1 |  |
| Mtmr9          | 223   | 0.98 | 0.16 | NM_177594.1 |  |
| Oas1g          | 71    | 0.98 | 0.14 | NM_011852   |  |
| C920008O22Rik  | 420   | 0.98 | 0.06 | AK050594    |  |
| A530092L01Rik  | 246   | 0.98 | 0.14 | AK041221    |  |
| Dncl1          | 452   | 0.98 | 0.10 | NM_146229.1 |  |
| Pycr1          | 184   | 0.98 | 0.08 | NM_144795.1 |  |
| Cops2          | 2467  | 0.98 | 0.24 | NM_009939   |  |
| Sel1h          | 1612  | 0.98 | 0.15 | NM_011344.1 |  |
| Olf786         | 50    | 0.98 | 0.21 | NM_146549.1 |  |
| 1110037P13Rik  | 56    | 0.98 | 0.81 | AK075652    |  |
| mtDNA_ND4L     | 5028  | 0.98 | 0.34 |             |  |
| 2810470K03Rik  | 2341  | 0.98 | 0.28 |             |  |
| Xbp1           | 6197  | 0.98 | 0.14 | NM_013842.2 |  |
| Nedl1          | 31    | 0.98 | 0.29 | XM_484217   |  |
| Usp47          | 975   | 0.98 | 0.18 | NM_133758   |  |
| D630047N04Rik  | 38    | 0.98 | 0.26 | AK085620    |  |
| Pou2f1         | 275   | 0.98 | 0.46 | NM_011137   |  |
| scl000728.1_50 | 295   | 0.98 | 0.22 |             |  |
| LOC382391      | 48    | 0.98 | 0.46 | XM_356482.1 |  |
| Dcamk1         | 70    | 0.98 | 0.45 | NM_019978.1 |  |
| Casp7          | 209   | 0.98 | 0.18 | NM_007611.1 |  |
| LOC385274      | 31    | 0.98 | 0.67 | XM_358163.1 |  |
| Atp2c1         | 469   | 0.98 | 0.22 | NM_175025.2 |  |
| Ywhab          | 7161  | 0.98 | 0.06 | NM_018753.3 |  |
| 1110013L07Rik  | 490   | 0.98 | 0.40 | XM_130939.2 |  |
| Tpd52          | 4775  | 0.98 | 0.11 | NM_009412   |  |
| Pim2           | 50    | 0.98 | 0.30 | NM_138606.1 |  |

|               |       |      |      |             |  |
|---------------|-------|------|------|-------------|--|
| Prc1          | 4178  | 0.98 | 0.21 | NM_145150.1 |  |
| 9430029P12Rik | 170   | 0.98 | 0.26 | AK034732    |  |
| 9230102G06Rik | 1001  | 0.98 | 0.07 | AK078990    |  |
| R3hdm         | 242   | 0.98 | 0.21 | NM_181750   |  |
| B130055N23Rik | 56    | 0.98 | 0.19 | XM_127501.4 |  |
| 9930024G20Rik | 69    | 0.98 | 0.31 | AK036917    |  |
| Lrrc57        | 1107  | 0.98 | 0.12 |             |  |
| 4732456P10Rik | 82    | 0.98 | 0.31 | AK028794    |  |
| 2810403A07Rik | 2977  | 0.98 | 0.07 | NM_028814.1 |  |
| BC011248      | 80    | 0.98 | 0.33 | NM_144857.1 |  |
| Skiv2l        | 902   | 0.98 | 0.14 | NM_178062.2 |  |
| 5033403D15Rik | 2220  | 0.98 | 0.21 |             |  |
| Adam17        | 570   | 0.98 | 0.22 | NM_009615.4 |  |
| 2610528O22Rik | 901   | 0.98 | 0.15 | NM_153395.1 |  |
| Arpc5         | 7053  | 0.98 | 0.05 | XM_123523.1 |  |
| Gle1l         | 239   | 0.98 | 0.14 | XM_130106.3 |  |
| 1810008K03Rik | 11955 | 0.98 | 0.16 | NM_026929.2 |  |
| Gemin4        | 332   | 0.98 | 0.14 | NM_177367.2 |  |
| Man2a1        | 1450  | 0.98 | 0.19 | NM_008549.1 |  |
| Eif4enif1     | 897   | 0.98 | 0.07 | NM_023743.1 |  |
| Ppgb          | 170   | 0.98 | 0.12 | NM_008906.2 |  |
| AU021838      | 2709  | 0.98 | 0.12 |             |  |
| Zfp131        | 1084  | 0.98 | 0.13 | NM_028245.1 |  |
| D5Ert40e      | 54    | 0.98 | 0.33 |             |  |
| 2610037P13Rik | 401   | 0.98 | 0.08 |             |  |
| 4933415A04Rik | 32    | 0.98 | 0.30 |             |  |
| E030003N15Rik | 684   | 0.98 | 0.28 | XM_128129.4 |  |
| Gabpb1        | 191   | 0.98 | 0.09 | NM_010249   |  |
| AA792894      | 1125  | 0.98 | 0.13 | NM_145568.2 |  |
| Cab39l        | 183   | 0.98 | 0.18 | NM_026908.2 |  |
| 4931403I22Rik | 146   | 0.98 | 0.20 | AK081238    |  |
| 4930477M19    | 286   | 0.98 | 0.11 | NM_177729.2 |  |
| Attp          | 227   | 0.98 | 0.17 | NM_016855   |  |
| Btbd1         | 2427  | 0.98 | 0.06 | NM_146193   |  |
| A430110M15Rik | 57    | 0.98 | 0.31 |             |  |
| 4932417I16Rik | 593   | 0.98 | 0.10 | XM_134593.3 |  |
| 5730568A12Rik | 148   | 0.98 | 0.13 | NM_025689.1 |  |
| Nxph1         | 1973  | 0.98 | 0.16 | NM_008751.2 |  |
| Msr2          | 554   | 0.98 | 0.20 |             |  |
| 9130416N05Rik | 872   | 0.98 | 0.43 | XM_129827.2 |  |
| 4732435K05Rik | 423   | 0.98 | 0.31 | AK028687    |  |
| Ap3s2         | 297   | 0.98 | 0.09 | NM_009682.2 |  |
| Man1a2        | 469   | 0.98 | 0.17 |             |  |
| 1200014J11Rik | 1638  | 0.98 | 0.17 | NM_025818.1 |  |
| 4930431L18Rik | 560   | 0.98 | 0.19 | XM_194424.2 |  |
| Kihl17        | 678   | 0.98 | 0.09 | NM_198305.1 |  |
| Glg1          | 5693  | 0.98 | 0.10 | NM_009149   |  |
| Adamts8       | 31    | 0.98 | 0.43 | NM_013906.1 |  |
| Git2          | 198   | 0.98 | 0.13 | NM_019834.2 |  |
| Zfp646        | 82    | 0.98 | 0.18 |             |  |
| Nanos1        | 1137  | 0.98 | 0.08 | NM_178421.2 |  |
| Skil          | 1049  | 0.98 | 0.14 | NM_011386   |  |
| 1110019C08Rik | 597   | 0.98 | 0.39 | NM_171826   |  |
| 5830468K18Rik | 216   | 0.98 | 0.09 | NM_172644   |  |
| BC057627      | 957   | 0.98 | 0.11 | NM_198631   |  |
| 4632412N22Rik | 30    | 0.98 | 0.35 | NM_177087.2 |  |
| Gprk5         | 133   | 0.98 | 0.36 | NM_018869.2 |  |
| Rab5a         | 1883  | 0.98 | 0.13 | NM_025887.2 |  |
| Olf1065       | 46    | 0.98 | 0.08 | NM_146408.1 |  |
| G430055L02Rik | 75    | 0.98 | 0.13 | NM_145520   |  |
| Ppl           | 135   | 0.98 | 0.06 | XM_148334.1 |  |
| Plekhc1       | 3721  | 0.98 | 0.08 | NM_146054.1 |  |
| Kpna1         | 2672  | 0.98 | 0.21 | NM_008465.2 |  |
| 5930404A08Rik | 46    | 0.98 | 0.22 | AK031091    |  |
| Mthfd1        | 748   | 0.98 | 0.09 | NM_138745   |  |
| C78339        | 1795  | 0.98 | 0.08 | XM_127312.4 |  |
| Mobk1b        | 410   | 0.98 | 0.14 | NM_145571.1 |  |
| Slc4a2        | 766   | 0.98 | 0.05 | NM_009207.1 |  |

|               |      |      |      |              |  |
|---------------|------|------|------|--------------|--|
| Acad9         | 278  | 0.98 | 0.18 | NM_172678.2  |  |
| 4930429A22Rik | 306  | 0.98 | 0.09 | AK029652     |  |
| D230025D16Rik | 181  | 0.98 | 0.21 | NM_145604.1  |  |
| LOC381332     | 169  | 0.98 | 0.18 | XM_355290.1  |  |
| Mep1b         | 35   | 0.98 | 0.14 | NM_008586    |  |
| Idua          | 105  | 0.98 | 0.07 | NM_008325.1  |  |
| Ccbl1         | 536  | 0.98 | 0.27 | NM_172404.2  |  |
| BC053749      | 147  | 0.98 | 0.18 | NM_183321.1  |  |
| Pstpip2       | 98   | 0.98 | 0.20 | AK033996     |  |
| Ascc3l1       | 869  | 0.98 | 0.05 | NM_177214.3  |  |
| C030018G13Rik | 88   | 0.98 | 0.22 | NM_175510.2  |  |
| LOC271490     | 1467 | 0.98 | 0.18 | XM_195069.2  |  |
| Siah2         | 439  | 0.98 | 0.40 | NM_009174.2  |  |
| 2010209O12Rik | 42   | 0.98 | 0.50 | NM_133913.1  |  |
| Rgl2          | 920  | 0.98 | 0.24 | NM_009059.2  |  |
| A830050C03Rik | 31   | 0.98 | 0.20 | AK043914     |  |
| Nup107        | 848  | 0.98 | 0.19 | NM_134010.1  |  |
| Ube2b         | 3173 | 0.98 | 0.04 | NM_009458.2  |  |
| Daam1         | 334  | 0.98 | 0.15 | NM_172464.1  |  |
| Hmgb2l1       | 1109 | 0.98 | 0.12 | NM_178017.1  |  |
| 2610021K21Rik | 144  | 0.98 | 0.03 | XM_354690    |  |
| Chd2          | 390  | 0.98 | 0.13 | XM_145698.4  |  |
| 1190005F20Rik | 1826 | 0.98 | 0.11 | XM_355244    |  |
| Gga2          | 811  | 0.98 | 0.14 | XM_133801.3  |  |
| Ufd1l         | 583  | 0.98 | 0.06 | XM_147231.1  |  |
| Ott           | 885  | 0.98 | 0.11 | NM_011022.1  |  |
| Bmp5          | 33   | 0.98 | 0.51 | NM_007555.1  |  |
| Cox15         | 1052 | 0.98 | 0.13 | NM_144874    |  |
| Atp2b1        | 472  | 0.98 | 0.05 |              |  |
| E130206E21Rik | 235  | 0.98 | 0.08 | AK053690     |  |
| Casp8         | 2657 | 0.98 | 0.09 | NM_009812.1  |  |
| Fxr1h         | 318  | 0.98 | 0.20 | NM_008053    |  |
| Afmid         | 117  | 0.98 | 0.25 | NM_027827.2  |  |
| G430022H21Rik | 108  | 0.98 | 0.17 | NM_201638.1  |  |
| Txndc4        | 103  | 0.98 | 0.07 | NM_029572.1  |  |
| AK129302      | 320  | 0.98 | 0.19 |              |  |
| Gldc          | 79   | 0.98 | 0.25 | NM_138595.1  |  |
| Cdkl2         | 939  | 0.98 | 0.07 | NM_016912.1  |  |
| mtDNA_ND5     | 8958 | 0.98 | 0.04 |              |  |
| Fnbp2         | 88   | 0.98 | 0.05 | XM_129445    |  |
| Ptgrn         | 31   | 0.98 | 0.25 | NM_011197    |  |
| Olfml2b       | 665  | 0.98 | 0.11 | NM_177068.3  |  |
| Ppap2a        | 590  | 0.98 | 0.22 | NM_008247.1  |  |
| 2410118l19Rik | 2150 | 0.98 | 0.14 | XM_129726    |  |
| D830005N24Rik | 60   | 0.98 | 0.01 | AK085766     |  |
| 2810439K08Rik | 125  | 0.98 | 0.30 | NM_028343.2  |  |
| Snx1          | 831  | 0.98 | 0.15 | NM_019727.1  |  |
| Insig2        | 733  | 0.98 | 0.14 | NM_133748.1  |  |
| Tpm4          | 4505 | 0.98 | 0.10 | XM_134274.3  |  |
| BC034507      | 345  | 0.98 | 0.26 | XM_131888    |  |
| 4930467B06Rik | 248  | 0.98 | 0.05 | NM_029786.1  |  |
| 2610200G18Rik | 36   | 0.98 | 0.20 | NM_025998.1  |  |
| Sfmbt1        | 387  | 0.98 | 0.21 | NM_019460.1  |  |
| A730020L20Rik | 31   | 0.98 | 0.64 | AK042744     |  |
| Pard6b        | 76   | 0.98 | 0.03 | XM_141543.1  |  |
| A230061B10Rik | 77   | 0.98 | 0.11 | AK038766     |  |
| 1110056N09Rik | 209  | 0.98 | 0.24 | NM_133700.1  |  |
| C230079O04Rik | 79   | 0.98 | 0.17 | AK048900     |  |
| Usp7          | 1399 | 0.98 | 0.04 | NM_001003918 |  |
| Ahcy          | 481  | 0.98 | 0.03 | NM_016661.1  |  |
| LOC381928     | 53   | 0.98 | 0.15 | XM_355949.1  |  |
| 5430405G24Rik | 2609 | 0.98 | 0.08 | XM_152907.3  |  |
| D14Ert231e    | 101  | 0.98 | 0.27 | NM_153414.2  |  |
| E130209G04Rik | 222  | 0.98 | 0.19 | XM_358323.1  |  |
| Zfp597        | 871  | 0.98 | 0.17 |              |  |
| A630049I22Rik | 31   | 0.98 | 0.24 | AK080309     |  |
| Herpud1       | 4528 | 0.98 | 0.07 | NM_022331.1  |  |
| Grsf1         | 4841 | 0.98 | 0.12 | NM_178700.2  |  |

|               |       |      |      |             |  |
|---------------|-------|------|------|-------------|--|
| Nptn          | 4592  | 0.98 | 0.06 |             |  |
| Fgf22         | 210   | 0.98 | 0.23 | NM_023304.1 |  |
| D030070L09Rik | 583   | 0.98 | 0.09 | NM_172625.1 |  |
| Tes3          | 448   | 0.98 | 0.08 | NM_033623.1 |  |
| 1700015L13Rik | 45    | 0.98 | 0.36 | AK006001    |  |
| Hoxd4         | 93    | 0.98 | 0.20 | NM_010469.1 |  |
| Abcb10        | 142   | 0.98 | 0.10 | NM_019552.1 |  |
| Arhgef3       | 412   | 0.98 | 0.17 | NM_027871.1 |  |
| Zfp162        | 220   | 0.98 | 0.30 | NM_011750   |  |
| Ddx20         | 347   | 0.98 | 0.06 | NM_017397.2 |  |
| Myo5c         | 150   | 0.98 | 0.33 | XM_198225.3 |  |
| Tmem77        | 221   | 0.98 | 0.12 |             |  |
| Tdg           | 395   | 0.98 | 0.09 | NM_172552.1 |  |
| 4930485D02Rik | 381   | 0.98 | 0.24 | NM_175225.2 |  |
| 9530053J19Rik | 535   | 0.98 | 0.06 |             |  |
| Fiz1          | 1333  | 0.98 | 0.28 | NM_011813.2 |  |
| Ubp1          | 1527  | 0.98 | 0.16 | NM_013699   |  |
| Ppm1g         | 6029  | 0.98 | 0.07 | NM_008014.2 |  |
| D530033C11Rik | 485   | 0.98 | 0.09 | NM_030132.2 |  |
| Crem          | 102   | 0.98 | 0.18 | NM_013498   |  |
| Efcfbp2       | 232   | 0.98 | 0.21 | NM_054095.1 |  |
| Phtf1         | 507   | 0.98 | 0.06 | XM_356222.1 |  |
| 4933434I20Rik | 37    | 0.98 | 0.10 | NM_026233.1 |  |
| LOC381313     | 113   | 0.98 | 0.32 | XM_355260.1 |  |
| Rnf11         | 4826  | 0.98 | 0.07 | NM_013876.2 |  |
| Phkg2         | 204   | 0.98 | 0.20 | AK079680    |  |
| Ank           | 2650  | 0.98 | 0.04 | NM_020332.2 |  |
| LOC384934     | 68    | 0.98 | 0.26 | XM_357946.1 |  |
| Shmt1         | 362   | 0.98 | 0.12 | NM_009171.1 |  |
| Rbm12         | 365   | 0.98 | 0.17 | NM_029397.2 |  |
| Stk25         | 521   | 0.98 | 0.17 | NM_021537.2 |  |
| E030040L08Rik | 48    | 0.97 | 0.05 | AK087265    |  |
| LOC381453     | 33    | 0.97 | 0.20 | XM_355405.1 |  |
| Junb          | 376   | 0.97 | 0.44 | AK044253    |  |
| Tssc8         | 146   | 0.97 | 0.23 |             |  |
| 4922505G16Rik | 31    | 0.97 | 0.13 |             |  |
| Mxi1          | 134   | 0.97 | 0.13 | NM_010847.1 |  |
| Sfrs1         | 9043  | 0.97 | 0.12 | NM_173374.2 |  |
| BC033596      | 1391  | 0.97 | 0.27 | XM_147426.3 |  |
| 2700055A20Rik | 726   | 0.97 | 0.19 | NM_027314.2 |  |
| Vps39         | 285   | 0.97 | 0.12 | NM_147153.2 |  |
| Snx26         | 38    | 0.97 | 0.49 | NM_178252.2 |  |
| E430033C13Rik | 51    | 0.97 | 0.08 | AK088949    |  |
| Paqr3         | 144   | 0.97 | 0.07 | NM_198422.1 |  |
| Prosc         | 229   | 0.97 | 0.17 | NM_054057.1 |  |
| 4933434G05Rik | 94    | 0.97 | 0.37 | XM_126681.3 |  |
| D1Bwg0212e    | 649   | 0.97 | 0.11 | NM_028043.2 |  |
| Htatsf1       | 3941  | 0.97 | 0.16 | NM_028242.1 |  |
| E030038D23Rik | 232   | 0.97 | 0.11 | AK087243    |  |
| Cdyl          | 93    | 0.97 | 0.17 | NM_009881   |  |
| Ccdc64        | 247   | 0.97 | 0.17 |             |  |
| Ppp2r1a       | 4553  | 0.97 | 0.10 | NM_016891.2 |  |
| Csmd2         | 209   | 0.97 | 0.23 |             |  |
| Apba1         | 39    | 0.97 | 0.46 | NM_177034.2 |  |
| Ankrd10       | 1537  | 0.97 | 0.08 | NM_133971.1 |  |
| Bmp1          | 484   | 0.97 | 0.17 | NM_009755.2 |  |
| Rtn4r1        | 250   | 0.97 | 0.17 | NM_177708.3 |  |
| Tnks1bp1      | 110   | 0.97 | 0.46 | XM_130286.2 |  |
| 5830476B15Rik | 101   | 0.97 | 0.08 | AK030986    |  |
| Scoc          | 2216  | 0.97 | 0.08 | NM_019708   |  |
| LOC385792     | 567   | 0.97 | 0.21 | XM_358947.1 |  |
| B430206E18Rik | 34    | 0.97 | 0.18 | XM_284398.1 |  |
| Ing1l         | 221   | 0.97 | 0.08 | NM_023503.2 |  |
| 6720407G21Rik | 172   | 0.97 | 0.07 | XM_133272.4 |  |
| Atp6v1h       | 15158 | 0.97 | 0.06 | NM_133826.2 |  |
| Wdr33         | 222   | 0.97 | 0.16 |             |  |
| Ccnk          | 98    | 0.97 | 0.08 | NM_009832.1 |  |
| Metap2        | 333   | 0.97 | 0.23 | NM_019648.2 |  |



|                 |      |      |      |              |  |
|-----------------|------|------|------|--------------|--|
| 1300007L22Rik   | 155  | 0.97 | 0.03 | NM_027917.1  |  |
| Stau2           | 3203 | 0.97 | 0.08 | NM_025303    |  |
| Acate2          | 113  | 0.97 | 0.10 | NM_019736.2  |  |
| Nol8            | 2933 | 0.97 | 0.08 | XM_484255    |  |
| 1110011C06Rik   | 1368 | 0.97 | 0.11 |              |  |
| Bhlhb2          | 889  | 0.97 | 0.38 | NM_011498.2  |  |
| Il6ra           | 47   | 0.97 | 0.32 | NM_010559    |  |
| Nin             | 413  | 0.97 | 0.13 | NM_008697.1  |  |
| Mbc2            | 928  | 0.97 | 0.31 | NM_011843.1  |  |
| Recc1           | 3083 | 0.97 | 0.11 | NM_011258.1  |  |
| Usp22           | 1545 | 0.97 | 0.05 | NM_001004143 |  |
| Mtyh            | 77   | 0.97 | 0.34 | NM_133250    |  |
| Tfg             | 5223 | 0.97 | 0.15 | NM_019678.1  |  |
| 2210010A19Rik   | 1644 | 0.97 | 0.07 |              |  |
| M6a-pending     | 33   | 0.97 | 0.12 | AK035061     |  |
| Laptm4b         | 217  | 0.97 | 0.09 | NM_033521.2  |  |
| Asah2           | 60   | 0.97 | 0.17 | AK047692     |  |
| scl0001416.1_21 | 62   | 0.97 | 0.22 |              |  |
| LOC545013       | 172  | 0.97 | 0.21 |              |  |
| Gtf3c4          | 529  | 0.97 | 0.17 | NM_172977    |  |
| B230340J04Rik   | 42   | 0.97 | 0.07 | NM_177234    |  |
| A530064L23Rik   | 169  | 0.97 | 0.15 | AK080118     |  |
| Gtl7            | 283  | 0.97 | 0.06 | XM_283757.2  |  |
| Sulf1           | 146  | 0.97 | 0.05 | NM_172294    |  |
| Mcoln2          | 57   | 0.97 | 0.10 | NM_026656.2  |  |
| Wdr11           | 188  | 0.97 | 0.13 | NM_172255.1  |  |
| Creb3l1         | 90   | 0.97 | 0.54 | NM_011957.1  |  |
| LOC381140       | 1642 | 0.97 | 0.41 | XM_355056.1  |  |
| C230078M08Rik   | 752  | 0.97 | 0.11 | NM_176995.2  |  |
| Ube1dc1         | 2627 | 0.97 | 0.10 | NM_025692.1  |  |
| C820002F04Rik   | 36   | 0.97 | 0.25 | AK050476     |  |
| Mgea6           | 4869 | 0.97 | 0.21 | NM_146034.1  |  |
| 2810036L13Rik   | 2255 | 0.97 | 0.13 | NM_144802.2  |  |
| A030003K02Rik   | 34   | 0.97 | 0.38 |              |  |
| Orc4            | 91   | 0.97 | 0.27 | AK012669     |  |
| 6330545A04Rik   | 48   | 0.97 | 0.42 |              |  |
| Xrn2            | 210  | 0.97 | 0.12 | NM_011917    |  |
| Sos2            | 446  | 0.97 | 0.34 | XM_127051.3  |  |
| Foxred2         | 67   | 0.97 | 0.41 |              |  |
| E030022H21      | 305  | 0.97 | 0.32 | XM_126779.5  |  |
| Ccna2           | 47   | 0.97 | 0.19 | NM_009828.1  |  |
| Adam22          | 35   | 0.97 | 0.09 | XM_131876.3  |  |
| Tpcn2           | 192  | 0.97 | 0.21 | NM_146206.2  |  |
| C130027E04Rik   | 301  | 0.97 | 0.18 |              |  |
| Tnfrsf1a        | 399  | 0.97 | 0.57 | NM_011609.2  |  |
| LOC237749       | 34   | 0.97 | 0.23 | XM_111219.3  |  |
| Smarcc1         | 684  | 0.97 | 0.12 | NM_009211.1  |  |
| LOC433886       | 92   | 0.97 | 0.14 |              |  |
| Al451006        | 137  | 0.97 | 0.14 | NM_178919.2  |  |
| Hnrpu           | 107  | 0.97 | 0.25 | NM_016805.1  |  |
| Ctdsp2          | 698  | 0.97 | 0.21 | NM_146012.1  |  |
| Vil2            | 637  | 0.97 | 0.23 | NM_009510    |  |
| 2610507N02Rik   | 294  | 0.97 | 0.14 |              |  |
| LOC632687       | 198  | 0.97 | 0.13 |              |  |
| LOC332788       | 2556 | 0.97 | 0.26 | XM_285750.2  |  |
| Gpatc1          | 129  | 0.97 | 0.11 | NM_026181.1  |  |
| 4832436M01Rik   | 43   | 0.97 | 0.71 | AK029335     |  |
| BC025462        | 98   | 0.97 | 0.27 | NM_145946.1  |  |
| 0610009J05Rik   | 107  | 0.97 | 0.10 | AK002411     |  |
| 4930438O05Rik   | 168  | 0.97 | 0.09 | NM_030184.1  |  |
| LOC241944       | 220  | 0.97 | 0.31 | XM_143175.2  |  |
| Pald            | 577  | 0.97 | 0.18 | NM_013753.1  |  |
| Zdhhc1          | 37   | 0.97 | 0.39 | NM_175160.2  |  |
| Elf3s9          | 2416 | 0.97 | 0.09 | NM_133916.1  |  |
| Mapk9           | 919  | 0.97 | 0.14 | AK043169     |  |
| Cct7            | 104  | 0.97 | 0.24 | NM_007638.2  |  |
| Slc6a8          | 1362 | 0.97 | 0.05 | NM_133987.1  |  |
| Tfb2m           | 281  | 0.97 | 0.06 | NM_008249    |  |

|                |      |      |      |             |  |
|----------------|------|------|------|-------------|--|
| D030074E01Rik  | 106  | 0.97 | 0.08 |             |  |
| LOC195071      | 31   | 0.97 | 0.01 | XM_111200.1 |  |
| Upf2           | 4010 | 0.97 | 0.10 | XM_140801.3 |  |
| Fmn13          | 146  | 0.97 | 0.19 | NM_011711.1 |  |
| Acad10         | 105  | 0.97 | 0.17 |             |  |
| Serpinf1       | 67   | 0.97 | 0.24 | NM_011340.2 |  |
| 4831413G18Rik  | 70   | 0.97 | 0.12 | AK029196    |  |
| 2610312B22Rik  | 1480 | 0.97 | 0.07 | NM_026934.2 |  |
| C030014F05Rik  | 150  | 0.97 | 0.08 | AK021080    |  |
| C630002N04Rik  | 392  | 0.97 | 0.23 | AK049839    |  |
| Inadl          | 33   | 0.97 | 0.20 |             |  |
| Ube1c          | 739  | 0.97 | 0.25 |             |  |
| 1700066F09Rik  | 547  | 0.97 | 0.12 | AK006902    |  |
| Cpsf1          | 260  | 0.97 | 0.03 | NM_053193   |  |
| Psme3          | 3433 | 0.97 | 0.38 | NM_011192.2 |  |
| B230344N16     | 180  | 0.97 | 0.07 | XM_355941.1 |  |
| Zfp261         | 616  | 0.97 | 0.26 | NM_019831   |  |
| C330002I19Rik  | 2442 | 0.97 | 0.17 | AK021172    |  |
| B930074N03Rik  | 595  | 0.97 | 0.33 | AK047478    |  |
| 0610008F07Rik  | 31   | 0.97 | 0.35 | NM_197983.1 |  |
| Rsrc2          | 1889 | 0.97 | 0.06 |             |  |
| Enpp4          | 1035 | 0.97 | 0.14 | NM_199016.1 |  |
| Osbpl11        | 236  | 0.97 | 0.20 | NM_176840.2 |  |
| LOC212963      | 265  | 0.97 | 0.18 | XM_159721.1 |  |
| 9830132G07Rik  | 386  | 0.97 | 0.24 | NM_172643.1 |  |
| LOC386484      | 426  | 0.97 | 0.18 | XM_359323.1 |  |
| Pink1          | 262  | 0.97 | 0.13 | NM_026880   |  |
| A730054J21Rik  | 88   | 0.97 | 0.15 |             |  |
| Bcl7b          | 106  | 0.97 | 0.19 | NM_009745.1 |  |
| Helz           | 291  | 0.97 | 0.15 | NM_198298   |  |
| A730098D12Rik  | 1507 | 0.97 | 0.16 | NM_177680.2 |  |
| Gimap8         | 141  | 0.97 | 0.26 |             |  |
| 2510006C20Rik  | 48   | 0.97 | 0.23 | NM_026527.1 |  |
| MAp19          | 254  | 0.97 | 0.08 | XM_358353.1 |  |
| 5031425E22Rik  | 402  | 0.97 | 0.16 | XM_149592.1 |  |
| Tegt           | 7704 | 0.97 | 0.11 | NM_026669.2 |  |
| Smc1a          | 2269 | 0.97 | 0.12 |             |  |
| 4930435M24Rik  | 43   | 0.97 | 0.34 | AK015327    |  |
| Ap3b1          | 420  | 0.97 | 0.08 | NM_009680.2 |  |
| Bcar1          | 180  | 0.97 | 0.17 | NM_009954.2 |  |
| Rwdd3          | 97   | 0.97 | 0.25 | NM_028456   |  |
| 3321401G04Rik  | 633  | 0.97 | 0.22 | XM_133096.5 |  |
| Skiip          | 153  | 0.97 | 0.02 | NM_025507.1 |  |
| Hdac6          | 290  | 0.97 | 0.28 | NM_010413   |  |
| LOC226955      | 35   | 0.97 | 0.39 | XM_136701.2 |  |
| 1200016E24Rik  | 873  | 0.97 | 0.15 | XM_489305   |  |
| Lt1            | 2281 | 0.97 | 0.21 |             |  |
| Hsd17b12       | 899  | 0.97 | 0.13 | NM_019657.2 |  |
| 1700019D03Rik  | 1754 | 0.97 | 0.14 | NM_144953.1 |  |
| Pcdhb14        | 207  | 0.97 | 0.27 | NM_053139.2 |  |
| Trp53inp2      | 1848 | 0.97 | 0.14 | NM_178111.2 |  |
| Dgkz           | 1088 | 0.97 | 0.24 | NM_138306.1 |  |
| Esrrb1         | 64   | 0.97 | 0.13 | NM_028680   |  |
| Denr           | 430  | 0.97 | 0.10 | NM_026603.1 |  |
| 2410142K10Rik  | 36   | 0.97 | 0.72 | AK010807    |  |
| Ipo4           | 1411 | 0.97 | 0.06 | NM_024267.4 |  |
| LOC277234      | 37   | 0.97 | 0.27 | XM_203694.2 |  |
| Tp120a-pending | 8298 | 0.97 | 0.19 | AK009683    |  |
| Olf1349        | 38   | 0.97 | 0.04 |             |  |
| Epn2           | 462  | 0.97 | 0.12 | NM_010148   |  |
| LOC381042      | 641  | 0.97 | 0.17 | XM_354958.1 |  |
| Fa2h           | 42   | 0.97 | 0.42 | NM_178086.2 |  |
| Smcr7l         | 616  | 0.97 | 0.09 |             |  |
| Card4          | 163  | 0.97 | 0.08 | NM_172729.1 |  |
| LOC381815      | 39   | 0.97 | 0.20 | XM_355818.1 |  |
| 1700024K14Rik  | 69   | 0.97 | 0.12 | NM_030179   |  |
| Dpp9           | 152  | 0.97 | 0.17 | NM_172624.1 |  |
| 9430045C13Rik  | 44   | 0.97 | 0.38 | AK034833    |  |

|                |      |      |      |             |  |
|----------------|------|------|------|-------------|--|
| 1200015P04Rik  | 44   | 0.97 | 0.14 | AK004798    |  |
| Trim25         | 1034 | 0.97 | 0.07 | XM_126545.2 |  |
| 4732468D17Rik  | 55   | 0.97 | 0.56 | XM_354861.1 |  |
| Ddx1           | 4035 | 0.97 | 0.20 | NM_134040.1 |  |
| Dhx32          | 3592 | 0.97 | 0.11 | NM_133941.1 |  |
| scl0002395.1_4 | 456  | 0.97 | 0.33 |             |  |
| Elavl2         | 2737 | 0.97 | 0.06 | NM_207686.1 |  |
| Cap1           | 1511 | 0.97 | 0.04 | NM_007598.2 |  |
| Mknk2          | 1953 | 0.97 | 0.21 | NM_021462.2 |  |
| Fgfr1op        | 282  | 0.97 | 0.21 | XM_354977.1 |  |
| LOC381692      | 42   | 0.97 | 0.32 | XM_355667.1 |  |
| Icam1          | 148  | 0.97 | 0.74 | NM_010493.2 |  |
| Sirt5          | 81   | 0.97 | 0.34 | NM_178848.2 |  |
| Rps15a         | 154  | 0.97 | 0.08 | NM_170669.2 |  |
| 2210403N09Rik  | 153  | 0.97 | 0.61 | XM_132372.2 |  |
| 4930556B16Rik  | 124  | 0.97 | 0.29 | AK080679    |  |
| D10Wsu93e      | 94   | 0.97 | 0.12 | NM_033072   |  |
| LOC195418      | 90   | 0.97 | 0.16 | XM_110848.2 |  |
| BC032203       | 1800 | 0.97 | 0.10 | XM_140041.3 |  |
| 4930579E17Rik  | 100  | 0.97 | 0.08 | NM_178629   |  |
| Nlr1x1         | 69   | 0.97 | 0.13 |             |  |
| Zfp265         | 2350 | 0.97 | 0.14 |             |  |
| 2310007B03Rik  | 30   | 0.97 | 0.20 | NM_172411.1 |  |
| Pja1           | 3162 | 0.97 | 0.01 | NM_008853.1 |  |
| Nsf            | 790  | 0.97 | 0.14 | NM_008740.2 |  |
| Aacs           | 4657 | 0.97 | 0.15 | NM_030210.1 |  |
| Tulp3          | 84   | 0.97 | 0.29 | AK035363    |  |
| Eif2ak1        | 631  | 0.97 | 0.10 | NM_013557.1 |  |
| Slc35b4        | 1954 | 0.97 | 0.12 | NM_021435.1 |  |
| Cryba4         | 73   | 0.97 | 0.52 | NM_021351.1 |  |
| Golga4         | 367  | 0.97 | 0.24 | NM_018748.2 |  |
| 2700032M20Rik  | 95   | 0.97 | 0.22 | AK012311    |  |
| Recql5         | 187  | 0.97 | 0.13 | NM_130454.1 |  |
| Ube2i          | 102  | 0.97 | 0.32 | NM_011665.2 |  |
| Ube1x          | 3820 | 0.97 | 0.09 | NM_009457.2 |  |
| Etfhdh         | 493  | 0.97 | 0.25 | NM_025794.1 |  |
| Diap1          | 251  | 0.97 | 0.12 | NM_007858.1 |  |
| LOC333751      | 438  | 0.97 | 0.13 | XM_289869.2 |  |
| 1200003O06Rik  | 970  | 0.97 | 0.29 | NM_025813.1 |  |
| LOC232974      | 55   | 0.97 | 0.18 | XM_145453.3 |  |
| Abi1           | 1067 | 0.97 | 0.07 | NM_007380   |  |
| 1700029G01Rik  | 731  | 0.97 | 0.16 | NM_025856.1 |  |
| Rragd          | 904  | 0.97 | 0.09 | NM_027491   |  |
| Cyp20a1        | 115  | 0.97 | 0.16 | XM_129747.4 |  |
| LOC328932      | 49   | 0.97 | 0.20 | XM_283485.2 |  |
| Dhx29          | 231  | 0.97 | 0.28 | NM_172594.2 |  |
| Arl10b         | 8962 | 0.96 | 0.07 | NM_026823.1 |  |
| Mark3          | 971  | 0.96 | 0.29 | AK083683    |  |
| Ppm1d          | 513  | 0.96 | 0.15 | AK051509    |  |
| 9530077A17Rik  | 41   | 0.96 | 0.61 | AK020647    |  |
| 1500005K14Rik  | 50   | 0.96 | 0.23 | XM_203453.1 |  |
| Mbd1           | 322  | 0.96 | 0.32 | AK007371    |  |
| Gtpbp1         | 793  | 0.96 | 0.05 | NM_013818   |  |
| scl0002540.1_6 | 5552 | 0.96 | 0.10 |             |  |
| Fntb           | 7410 | 0.96 | 0.08 | NM_145927.1 |  |
| Arl8b          | 1912 | 0.96 | 0.14 |             |  |
| Apc7-pending   | 50   | 0.96 | 0.12 | AK049968    |  |
| Ube3b          | 1340 | 0.96 | 0.17 | NM_054093.1 |  |
| 6330403E01Rik  | 786  | 0.96 | 0.19 | AK031808    |  |
| D430024I10Rik  | 33   | 0.96 | 0.18 | AK085011    |  |
| Fbxl20         | 996  | 0.96 | 0.09 | XM_126674.3 |  |
| 5730589K01Rik  | 1192 | 0.96 | 0.08 | NM_023434   |  |
| Zfp31          | 92   | 0.96 | 0.14 | NM_177758.3 |  |
| C030030G16Rik  | 94   | 0.96 | 0.24 | NM_175462.2 |  |
| 1500019C06Rik  | 79   | 0.96 | 0.57 | NM_177323.2 |  |
| 5730555F13Rik  | 1365 | 0.96 | 0.26 | NM_025690   |  |
| Anxa6          | 788  | 0.96 | 0.21 | AK013026    |  |
| 6430548M08Rik  | 1012 | 0.96 | 0.15 | NM_172286   |  |

|                 |      |      |      |             |  |
|-----------------|------|------|------|-------------|--|
| A930025D01Rik   | 286  | 0.96 | 0.07 | NM_178762.2 |  |
| Gm1805          | 111  | 0.96 | 0.03 |             |  |
| Ripk4           | 4146 | 0.96 | 0.21 | NM_023663   |  |
| 39696           | 1069 | 0.96 | 0.49 |             |  |
| 4933421G18Rik   | 2046 | 0.96 | 0.05 | NM_027707   |  |
| Klh10           | 34   | 0.96 | 0.31 | NM_025727.1 |  |
| Al480556        | 891  | 0.96 | 0.39 | XM_133474.4 |  |
| 9630020I24Rik   | 61   | 0.96 | 0.32 | AK079319    |  |
| AL024210        | 846  | 0.96 | 0.20 | NM_134052.1 |  |
| Zfp532          | 867  | 0.96 | 0.05 | NM_207255.1 |  |
| Tardbp          | 321  | 0.96 | 0.02 | NM_145556.2 |  |
| Prox1           | 646  | 0.96 | 0.21 | NM_008937.2 |  |
| Scn5a           | 57   | 0.96 | 0.28 | NM_021544   |  |
| Tnpo2           | 174  | 0.96 | 0.18 | NM_145390.1 |  |
| A830087C18Rik   | 38   | 0.96 | 0.32 | AK044072    |  |
| C330006P03Rik   | 720  | 0.96 | 0.30 |             |  |
| Ccng1           | 3953 | 0.96 | 0.13 | NM_009831   |  |
| Mterf-pending   | 322  | 0.96 | 0.06 | XM_110555.3 |  |
| 8030499H02Rik   | 414  | 0.96 | 0.18 | NM_030732.2 |  |
| A530023P05Rik   | 670  | 0.96 | 0.05 | AK079952    |  |
| BC088983        | 388  | 0.96 | 0.14 |             |  |
| D630046D15Rik   | 89   | 0.96 | 0.26 | AK052765    |  |
| 9630046K23Rik   | 4185 | 0.96 | 0.19 | NM_172380.1 |  |
| 4833425P12Rik   | 337  | 0.96 | 0.06 | AK039879    |  |
| A730042J05Rik   | 161  | 0.96 | 0.13 | NM_178708   |  |
| Zdhhc3          | 240  | 0.96 | 0.20 | NM_026917.4 |  |
| Meis1           | 169  | 0.96 | 0.15 | NM_010789.1 |  |
| Samd10          | 693  | 0.96 | 0.16 | NM_172676.2 |  |
| Al747699        | 266  | 0.96 | 0.05 |             |  |
| Flot2           | 1013 | 0.96 | 0.05 | NM_008028.1 |  |
| Ches1           | 222  | 0.96 | 0.14 | XM_127089.2 |  |
| 9230112E08Rik   | 97   | 0.96 | 0.09 | NM_177264   |  |
| E530020K13Rik   | 199  | 0.96 | 0.20 | AK089161    |  |
| Ift140          | 297  | 0.96 | 0.12 |             |  |
| Slc41a3         | 50   | 0.96 | 0.26 | XM_132686.3 |  |
| BC024537        | 820  | 0.96 | 0.11 | NM_146237.1 |  |
| Fvt1            | 1142 | 0.96 | 0.05 | XM_203753.2 |  |
| B930085C24Rik   | 82   | 0.96 | 0.42 | AK081093    |  |
| Rab7            | 1706 | 0.96 | 0.11 | NM_009005.1 |  |
| Peo1            | 231  | 0.96 | 0.03 | NM_153796   |  |
| BC034054        | 1523 | 0.96 | 0.17 | NM_178049.2 |  |
| D3Ucla1         | 3395 | 0.96 | 0.13 | NM_030685.1 |  |
| Ctnnb1          | 5466 | 0.96 | 0.04 |             |  |
| B230342M21Rik   | 533  | 0.96 | 0.11 | NM_133898.1 |  |
| 2410015B03Rik   | 197  | 0.96 | 0.24 | NM_028036.2 |  |
| 2310007D09Rik   | 478  | 0.96 | 0.28 | XM_130601.3 |  |
| Sqle            | 2924 | 0.96 | 0.25 | AK041198    |  |
| Mfhas1          | 221  | 0.96 | 0.10 | XM_356068   |  |
| Bace1           | 561  | 0.96 | 0.42 | NM_011792.3 |  |
| 4930544D05Rik   | 45   | 0.96 | 0.20 | XM_147503.1 |  |
| Actr3b          | 167  | 0.96 | 0.29 |             |  |
| D5Erd135e       | 148  | 0.96 | 0.21 | NM_172490   |  |
| Socs3           | 1427 | 0.96 | 0.37 | NM_007707.2 |  |
| Abcc8           | 176  | 0.96 | 0.08 | NM_011510.1 |  |
| Mcl1            | 4043 | 0.96 | 0.22 | NM_008562.2 |  |
| Zfp251          | 657  | 0.96 | 0.12 | XM_147946   |  |
| D430039N05Rik   | 129  | 0.96 | 0.34 | NM_175514   |  |
| Depdc6          | 129  | 0.96 | 0.04 |             |  |
| 4933405A16Rik   | 227  | 0.96 | 0.22 | NM_028943.1 |  |
| Adrbk2          | 116  | 0.96 | 0.10 | NM_177078.2 |  |
| B230339H12Rik   | 351  | 0.96 | 0.03 | NM_172282.1 |  |
| scl000260.1_64  | 77   | 0.96 | 0.19 |             |  |
| Hexdc           | 402  | 0.96 | 0.35 |             |  |
| Rnf138          | 411  | 0.96 | 0.09 | NM_207623.1 |  |
| Adprh1          | 35   | 0.96 | 0.26 | NM_172750.1 |  |
| scl0003651.1_17 | 514  | 0.96 | 0.32 |             |  |
| H6pd            | 1071 | 0.96 | 0.06 | NM_173371.2 |  |
| Stxbp1          | 1610 | 0.96 | 0.08 | NM_009295.1 |  |

|               |      |      |      |              |  |
|---------------|------|------|------|--------------|--|
| Olf1384       | 38   | 0.96 | 0.28 | NM_146472.1  |  |
| A130023A14Rik | 31   | 0.96 | 0.26 | AK037516     |  |
| Phka2         | 222  | 0.96 | 0.03 | NM_172783.1  |  |
| 2010002H18Rik | 1338 | 0.96 | 0.04 | NM_198653.1  |  |
| 9230115A19Rik | 1994 | 0.96 | 0.24 | XM_110546.2  |  |
| Osbpl6        | 1817 | 0.96 | 0.15 | NM_145525.1  |  |
| Ppp1r15b      | 187  | 0.96 | 0.15 | XM_148953.1  |  |
| LOC545471     | 107  | 0.96 | 0.06 |              |  |
| Rab22a        | 206  | 0.96 | 0.06 | NM_024436    |  |
| Igsf9         | 708  | 0.96 | 0.14 | NM_033608    |  |
| 6030423D04Rik | 60   | 0.96 | 0.28 | NM_153137.2  |  |
| Stat3         | 1919 | 0.96 | 0.11 | NM_011486.2  |  |
| 2900057D21Rik | 1311 | 0.96 | 0.19 | NM_145221.1  |  |
| Zdhhc5        | 292  | 0.96 | 0.21 | NM_144887.3  |  |
| 3110018K12Rik | 4673 | 0.96 | 0.08 | XM_129857.4  |  |
| Pglyrp1       | 32   | 0.96 | 0.26 | NM_009402.1  |  |
| Reck          | 54   | 0.96 | 0.11 | NM_016678    |  |
| Tlk1          | 8099 | 0.96 | 0.17 | NM_172664.2  |  |
| Eml1          | 1233 | 0.96 | 0.11 | XM_127139.5  |  |
| Lhx1          | 118  | 0.96 | 0.16 | NM_008498    |  |
| Ywhaz         | 6092 | 0.96 | 0.17 | AK050511     |  |
| Mobkl2a       | 216  | 0.96 | 0.21 |              |  |
| Zcchc4        | 64   | 0.96 | 0.09 | XM_132052    |  |
| Tro           | 1153 | 0.96 | 0.05 | NM_001002272 |  |
| LOC238943     | 2053 | 0.96 | 0.06 | XM_138902.2  |  |
| Tm7sf3        | 134  | 0.96 | 0.15 | XM_132970.3  |  |
| Sfrs6         | 3667 | 0.96 | 0.13 | NM_026499.2  |  |
| Pdlim5        | 74   | 0.96 | 0.19 |              |  |
| 9630029G12Rik | 60   | 0.96 | 0.27 | AK036041     |  |
| Magi1         | 112  | 0.96 | 0.09 | NM_172546.1  |  |
| C030046E11Rik | 233  | 0.96 | 0.28 |              |  |
| 2610209N15Rik | 75   | 0.96 | 0.38 | NM_183286    |  |
| 4933439J20Rik | 150  | 0.96 | 0.09 | AK030267     |  |
| Pccb          | 144  | 0.96 | 0.14 | NM_025835.1  |  |
| D5Ert689e     | 1040 | 0.96 | 0.02 | XM_358356.1  |  |
| Rad51         | 400  | 0.96 | 0.17 | NM_011234.2  |  |
| Sprl1         | 43   | 0.96 | 0.18 | NM_033175.1  |  |
| Dnajc7        | 695  | 0.96 | 0.45 | NM_019795.3  |  |
| Zfp36l2       | 47   | 0.96 | 0.21 | NM_007565.1  |  |
| LOC242235     | 30   | 0.96 | 0.20 | XM_143529.2  |  |
| 2410081M15Rik | 54   | 0.96 | 0.34 | NM_028603.1  |  |
| Dedd2         | 478  | 0.96 | 0.21 | NM_207677.1  |  |
| Slitr1        | 32   | 0.96 | 0.04 | NM_199065    |  |
| AA960558      | 4792 | 0.96 | 0.23 | NM_133942.1  |  |
| Thop1         | 1362 | 0.96 | 0.15 | NM_022653.2  |  |
| Rutbc3        | 512  | 0.96 | 0.24 | NM_134091.1  |  |
| C230080I20Rik | 202  | 0.96 | 0.39 | AK048908     |  |
| LOC382145     | 111  | 0.96 | 0.14 | XM_356241.1  |  |
| Glb1l         | 80   | 0.96 | 0.22 |              |  |
| Sp4           | 159  | 0.96 | 0.16 | NM_009239.1  |  |
| B230378H13Rik | 48   | 0.96 | 0.09 | NM_177089.3  |  |
| AV006891      | 38   | 0.96 | 0.36 | NM_178084.2  |  |
| Mfap3         | 1323 | 0.96 | 0.04 | NM_145426.1  |  |
| Pik3ca        | 205  | 0.96 | 0.33 | NM_008839.1  |  |
| Tmem65        | 5225 | 0.96 | 0.29 |              |  |
| Man2b2        | 150  | 0.96 | 0.17 | AK075649     |  |
| 5430432P15Rik | 1748 | 0.96 | 0.05 | XM_129246.4  |  |
| 5033413H12Rik | 256  | 0.96 | 0.08 | NM_173015    |  |
| TRBV21_X16691 | 31   | 0.96 | 0.02 |              |  |
| LOC383833     | 41   | 0.96 | 0.26 | XM_357282.1  |  |
| B130064I06Rik | 148  | 0.96 | 0.06 | AK045308     |  |
| 4933432H23Rik | 86   | 0.96 | 0.20 | XM_125678.1  |  |
| Trip13        | 39   | 0.96 | 0.35 | XM_127444.3  |  |
| Plekha2       | 3504 | 0.96 | 0.04 | NM_031257.2  |  |
| 4930452B06Rik | 819  | 0.96 | 0.15 | NM_028934.2  |  |
| 3010002L02Rik | 88   | 0.96 | 0.15 | AK013891     |  |
| LOC278105     | 62   | 0.96 | 0.33 | XM_204369.2  |  |
| 3010015K02Rik | 242  | 0.96 | 0.08 |              |  |

|               |      |      |      |             |  |
|---------------|------|------|------|-------------|--|
| Drp2          | 143  | 0.96 | 0.24 | XM_142131.1 |  |
| Ythdf1        | 2389 | 0.96 | 0.02 | NM_173761.3 |  |
| 4933407P14Rik | 56   | 0.96 | 0.19 | NM_199019.1 |  |
| Cyp7b1        | 414  | 0.96 | 0.15 | NM_007825.1 |  |
| Map3k14       | 74   | 0.96 | 0.09 | NM_016896.2 |  |
| 4932441P04Rik | 175  | 0.96 | 0.29 | AK016563    |  |
| Msn           | 373  | 0.96 | 0.13 | AK087001    |  |
| 9130020K20Rik | 167  | 0.96 | 0.26 |             |  |
| Zranb1        | 635  | 0.96 | 0.12 | XM_355951.1 |  |
| 3010022N24Rik | 170  | 0.96 | 0.62 | XM_149833.1 |  |
| Rars          | 3844 | 0.96 | 0.18 | NM_025936.1 |  |
| Rnf20         | 146  | 0.96 | 0.30 | NM_182999.1 |  |
| A230070D14Rik | 926  | 0.96 | 0.13 | AK038871    |  |
| BC013481      | 334  | 0.96 | 0.10 | NM_178446.2 |  |
| Sec61a2       | 906  | 0.96 | 0.08 | NM_021305.2 |  |
| lsg20l1       | 78   | 0.96 | 0.17 |             |  |
| Ddo           | 845  | 0.96 | 0.07 |             |  |
| Acyp1         | 54   | 0.96 | 0.19 | NM_025421.1 |  |
| Llglh2        | 3308 | 0.96 | 0.27 | NM_145438.1 |  |
| Smyd4         | 170  | 0.96 | 0.36 | NM_177009.1 |  |
| Agps          | 1698 | 0.96 | 0.15 | NM_172666.2 |  |
| B230213E18Rik | 48   | 0.96 | 0.45 | AK045580    |  |
| 4921532D18Rik | 837  | 0.96 | 0.13 | AK014994    |  |
| C330004K01Rik | 145  | 0.96 | 0.09 | AK021175    |  |
| Arih1         | 306  | 0.96 | 0.29 | NM_019927.1 |  |
| Zswim3        | 335  | 0.96 | 0.11 | NM_178375.2 |  |
| Nfix          | 68   | 0.96 | 0.20 | NM_010906.1 |  |
| Epb4.1        | 2196 | 0.96 | 0.11 | NM_183428.2 |  |
| Hrb2          | 387  | 0.96 | 0.13 | NM_178610   |  |
| LOC381249     | 35   | 0.96 | 0.03 | XM_355191.1 |  |
| Axl           | 62   | 0.96 | 0.27 | AK033237    |  |
| AU040320      | 1462 | 0.96 | 0.19 | NM_133886.1 |  |
| Xylt2         | 115  | 0.96 | 0.16 | NM_145828.1 |  |
| Pcna          | 613  | 0.96 | 0.31 | NM_011045.1 |  |
| E430039K05Rik | 255  | 0.96 | 0.28 | NM_177318.2 |  |
| Pfdn1         | 50   | 0.96 | 0.22 | NM_026027.1 |  |
| Rgag4         | 31   | 0.96 | 0.05 |             |  |
| Reg1          | 38   | 0.96 | 0.42 | NM_009042.1 |  |
| C330021A05Rik | 183  | 0.96 | 0.07 | NM_153082.1 |  |
| 6430567L13Rik | 36   | 0.96 | 0.54 | AK078283    |  |
| 4930506D23Rik | 309  | 0.96 | 0.18 | NM_175215.2 |  |
| Pls3          | 412  | 0.96 | 0.34 | NM_145629.1 |  |
| Acot11        | 51   | 0.96 | 0.16 |             |  |
| 3110053B16Rik | 49   | 0.96 | 0.14 |             |  |
| Pcx           | 51   | 0.96 | 0.22 | NM_008797.1 |  |
| Rragc         | 4143 | 0.96 | 0.03 | NM_017475   |  |
| LOC212815     | 199  | 0.96 | 0.17 | XM_137024.2 |  |
| 1500041O16Rik | 1393 | 0.96 | 0.33 |             |  |
| 1110012J17Rik | 420  | 0.96 | 0.17 | NM_172963.3 |  |
| 2310047L21Rik | 1397 | 0.96 | 0.06 | AK009885    |  |
| Hspca         | 2069 | 0.96 | 0.13 | NM_010480   |  |
| Snapc1        | 221  | 0.96 | 0.34 | NM_178392.2 |  |
| Apg16l        | 1478 | 0.96 | 0.06 | NM_029846.2 |  |
| Tdrd6         | 35   | 0.96 | 0.29 | NM_198418.1 |  |
| 2610318C08Rik | 2659 | 0.96 | 0.24 | XM_149213.1 |  |
| Six5          | 50   | 0.96 | 0.17 | XM_133221.2 |  |
| Pnliprp2      | 1510 | 0.96 | 0.10 | NM_011128.1 |  |
| Twsg1         | 1285 | 0.96 | 0.22 | NM_023053.1 |  |
| Mnt           | 71   | 0.96 | 0.44 | NM_010813   |  |
| BC018507      | 428  | 0.96 | 0.26 | XM_358313.1 |  |
| Gpr133        | 291  | 0.96 | 0.11 | NM_177734.2 |  |
| 9330132E09Rik | 263  | 0.96 | 0.16 | XM_283635.2 |  |
| Cdkal1        | 123  | 0.95 | 0.40 | NM_144536.1 |  |
| Kihl11        | 40   | 0.95 | 0.16 | NM_172565.1 |  |
| Ptpn2         | 116  | 0.95 | 0.04 | NM_008977.1 |  |
| Nfe2l2        | 267  | 0.95 | 0.02 | NM_010902.2 |  |
| 1100001D10Rik | 2024 | 0.95 | 0.05 | XM_358359.1 |  |
| Tpbp          | 362  | 0.95 | 0.29 | NM_011627   |  |

|                  |      |      |      |              |  |
|------------------|------|------|------|--------------|--|
| Rbm35a           | 5015 | 0.95 | 0.35 |              |  |
| Rarg             | 43   | 0.95 | 0.20 | NM_011244.2  |  |
| Tigd2            | 1000 | 0.95 | 0.04 | XM_144820.3  |  |
| Espnl            | 370  | 0.95 | 0.04 |              |  |
| Rab6b            | 2994 | 0.95 | 0.10 | NM_173781.3  |  |
| 5730405I09Rik    | 721  | 0.95 | 0.16 | NM_026484    |  |
| Sephs1           | 90   | 0.95 | 0.08 | NM_175400.5  |  |
| D8Erttd325e      | 6495 | 0.95 | 0.09 | NM_025804    |  |
| Izumo1           | 137  | 0.95 | 0.15 |              |  |
| Gtf2i            | 4081 | 0.95 | 0.28 | AK006796     |  |
| Zgpat            | 137  | 0.95 | 0.16 |              |  |
| Mttp             | 56   | 0.95 | 0.13 | NM_008642.1  |  |
| Bat8             | 863  | 0.95 | 0.11 | NM_145830.1  |  |
| 1700020N18Rik    | 68   | 0.95 | 0.34 |              |  |
| LOC245522        | 266  | 0.95 | 0.10 | XM_141965.5  |  |
| E130203E12Rik    | 57   | 0.95 | 0.19 | AK053686     |  |
| C230075L19Rik    | 2275 | 0.95 | 0.21 | NM_178694.3  |  |
| 5730577I03Rik    | 31   | 0.95 | 0.47 | NM_175110.2  |  |
| Rps6ka3          | 616  | 0.95 | 0.26 | NM_148945.1  |  |
| 2410025L10Rik    | 1064 | 0.95 | 0.25 | XM_132259.5  |  |
| Ccar1            | 2458 | 0.95 | 0.34 | NM_026201    |  |
| Brd3             | 3722 | 0.95 | 0.13 | NM_023336    |  |
| 9330175B01Rik    | 574  | 0.95 | 0.19 | XM_128267    |  |
| LOC381468        | 69   | 0.95 | 0.33 | XM_358588.1  |  |
| LOC210457        | 63   | 0.95 | 0.25 | XM_141682.1  |  |
| 4933426I21Rik    | 62   | 0.95 | 0.43 | XM_359328.1  |  |
| Msl2-pending     | 260  | 0.95 | 0.27 | XM_150227.4  |  |
| Jag2             | 580  | 0.95 | 0.16 | NM_010588.1  |  |
| Setdb1           | 567  | 0.95 | 0.06 | NM_018877.1  |  |
| LOC384941        | 30   | 0.95 | 0.31 | XM_357951.1  |  |
| Zfp239           | 124  | 0.95 | 0.09 | NM_001001792 |  |
| Pias4            | 949  | 0.95 | 0.18 | NM_021501.1  |  |
| Krt7             | 1580 | 0.95 | 0.20 |              |  |
| 2810432L12Rik    | 52   | 0.95 | 0.44 | NM_025944.2  |  |
| Caskin1          | 166  | 0.95 | 0.20 | NM_027937    |  |
| Prkwnk1          | 1260 | 0.95 | 0.12 | NM_198703.1  |  |
| Tnrc6            | 934  | 0.95 | 0.04 | XM_149986.1  |  |
| Fmip             | 921  | 0.95 | 0.06 | NM_172438.1  |  |
| Ankrd13d         | 72   | 0.95 | 0.86 |              |  |
| Gzf1             | 993  | 0.95 | 0.23 |              |  |
| Mlit2h           | 99   | 0.95 | 0.27 | NM_133919    |  |
| 2610019F03Rik    | 761  | 0.95 | 0.08 | NM_173744.2  |  |
| Fcmd             | 428  | 0.95 | 0.09 | NM_139309    |  |
| Map4k4           | 636  | 0.95 | 0.07 | NM_008696.1  |  |
| 1300018J18Rik    | 361  | 0.95 | 0.14 | NM_027905.1  |  |
| Setmar           | 114  | 0.95 | 0.36 | NM_178391.2  |  |
| Cai              | 6729 | 0.95 | 0.17 | NM_009787.1  |  |
| sci0002644.1_116 | 2791 | 0.95 | 0.20 |              |  |
| Stat2            | 188  | 0.95 | 0.04 | NM_019963.1  |  |
| Xpot             | 3374 | 0.95 | 0.22 | XM_125902.4  |  |
| Mmp9             | 37   | 0.95 | 0.19 | NM_013599.2  |  |
| Cwf19l2          | 965  | 0.95 | 0.32 | NM_027545.1  |  |
| LOC383455        | 31   | 0.95 | 0.48 | XM_357071.1  |  |
| Maged3l          | 47   | 0.95 | 0.30 | AK047777     |  |
| Gdi3             | 669  | 0.95 | 0.27 | NM_008112.2  |  |
| Bcl2l12          | 35   | 0.95 | 0.32 | NM_029410.1  |  |
| LOC385177        | 64   | 0.95 | 0.61 | XM_358102.1  |  |
| A630059F13Rik    | 47   | 0.95 | 0.19 | AK080344     |  |
| Ilgal            | 185  | 0.95 | 0.16 | NM_008400.1  |  |
| L1td1            | 34   | 0.95 | 0.70 |              |  |
| Kpna2            | 872  | 0.95 | 0.27 | XM_130821.1  |  |
| A130029H05Rik    | 2626 | 0.95 | 0.06 | AK037607     |  |
| sci0003949.1_31  | 115  | 0.95 | 0.15 |              |  |
| Gpr162           | 107  | 0.95 | 0.23 |              |  |
| 2610036C07Rik    | 600  | 0.95 | 0.09 | AK011690     |  |
| Gopc             | 217  | 0.95 | 0.41 | NM_053187.2  |  |
| Olf1r351         | 31   | 0.95 | 0.11 | NM_146942.1  |  |
| Dag1             | 48   | 0.95 | 0.36 | NM_010017.1  |  |

|                  |       |      |      |             |
|------------------|-------|------|------|-------------|
| Pcdhb10          | 108   | 0.95 | 0.03 | NM_053135.1 |
| Wif1             | 34    | 0.95 | 0.82 | NM_011915.1 |
| Atic             | 851   | 0.95 | 0.26 | AK051020    |
| LOC224276        | 503   | 0.95 | 0.20 | XM_147217.2 |
| 9630025I21Rik    | 41    | 0.95 | 0.19 | AK079330    |
| 5530401A10Rik    | 54    | 0.95 | 0.32 | XM_355123.1 |
| Tbc1d9           | 255   | 0.95 | 0.21 |             |
| Irf2             | 1876  | 0.95 | 0.03 | NM_008391.2 |
| Txndc7           | 1267  | 0.95 | 0.18 | XM_126809.3 |
| Cacybp           | 362   | 0.95 | 0.17 | NM_009786.1 |
| Dyrk3            | 1088  | 0.95 | 0.13 | NM_145508.1 |
| LOC386021        | 1249  | 0.95 | 0.10 | XM_359035.1 |
| scl000098.1_12_F | 466   | 0.95 | 0.09 |             |
| Strn4            | 1008  | 0.95 | 0.06 | NM_133789.1 |
| 2310015N21Rik    | 191   | 0.95 | 0.16 | NM_181397   |
| Gpr125           | 162   | 0.95 | 0.21 | XM_132089.2 |
| A730049B06Rik    | 47    | 0.95 | 0.28 | AK043026    |
| Slc2a5           | 79    | 0.95 | 0.20 | NM_019741.2 |
| A530026H04Rik    | 289   | 0.95 | 0.22 | AK040807    |
| Acp2             | 326   | 0.95 | 0.13 | NM_007387   |
| ORF21            | 110   | 0.95 | 0.19 | NM_145482.1 |
| Mak10            | 1724  | 0.95 | 0.01 | NM_030153.1 |
| Cog2             | 365   | 0.95 | 0.13 | NM_029746.2 |
| 6720425G15Rik    | 1953  | 0.95 | 0.19 | NM_198165.1 |
| Zbtb40           | 80    | 0.95 | 0.29 |             |
| Krtap8-2         | 58    | 0.95 | 0.49 | NM_010676.1 |
| 9630041C05       | 89    | 0.95 | 0.26 |             |
| Nedd4l           | 2279  | 0.95 | 0.10 | NM_031881.1 |
| Ptk2             | 2827  | 0.95 | 0.20 | NM_007982.1 |
| A530061E12Rik    | 145   | 0.95 | 0.14 | AK080103    |
| Ppp4r2           | 80    | 0.95 | 0.28 | NM_182939   |
| LOC277016        | 19671 | 0.95 | 0.05 | XM_203231.2 |
| Stard7           | 2628  | 0.95 | 0.10 | NM_139308.1 |
| Zfp36            | 667   | 0.95 | 0.27 |             |
| Eps15            | 768   | 0.95 | 0.30 | NM_007943   |
| BC061928         | 698   | 0.95 | 0.08 | NM_172861.2 |
| Zfp297b          | 42    | 0.95 | 0.18 | NM_027947.1 |
| Cggbp1           | 7476  | 0.95 | 0.30 | NM_178647.2 |
| 9230106L18Rik    | 51    | 0.95 | 0.13 | NM_033145.1 |
| LOC381000        | 188   | 0.95 | 0.20 | XM_354911.1 |
| Prr11            | 89    | 0.95 | 0.20 |             |
| 1190002H09Rik    | 119   | 0.95 | 0.37 | XM_355059.1 |
| 4930463P07Rik    | 866   | 0.95 | 0.14 |             |
| Myh8             | 30    | 0.95 | 0.24 | XM_354617   |
| Dstn             | 4415  | 0.95 | 0.13 | NM_019771.1 |
| 3110018K01Rik    | 2780  | 0.95 | 0.15 |             |
| LOC331423        | 45    | 0.95 | 0.43 | XM_285463.2 |
| Iars             | 1205  | 0.95 | 0.10 | NM_172015.1 |
| Zbtb5            | 312   | 0.95 | 0.26 | NM_173399.2 |
| 2610111M03Rik    | 725   | 0.95 | 0.10 | NM_029738.1 |
| Bai1             | 59    | 0.95 | 0.36 | NM_174991.2 |
| Zfp262           | 726   | 0.95 | 0.14 | XM_355521   |
| Ppp2r2d          | 2401  | 0.95 | 0.11 | NM_026391.2 |
| A830053O21Rik    | 58    | 0.95 | 0.16 | NM_177182.3 |
| 4930564D02Rik    | 31    | 0.95 | 0.37 | XM_355416.1 |
| LOC223782        | 32    | 0.95 | 0.56 | XM_139520.2 |
| E030015N22Rik    | 65    | 0.95 | 0.28 | AK053146    |
| Cylc1            | 33    | 0.95 | 0.34 | XM_285518.2 |
| Nup88            | 1521  | 0.95 | 0.10 | NM_172394.1 |
| Plekhk1          | 134   | 0.95 | 0.19 | XM_483915   |
| Zfp82            | 101   | 0.95 | 0.08 | NM_177889.2 |
| 4932410M19Rik    | 96    | 0.95 | 0.17 | AK029954    |
| AW049829         | 40    | 0.95 | 0.31 | NM_153571.1 |
| C430016J18Rik    | 55    | 0.95 | 0.23 | AK049487    |
| C430003P19Rik    | 988   | 0.95 | 0.10 | NM_198017.1 |
| Dcp1b            | 390   | 0.95 | 0.14 |             |
| Sptlc1           | 1375  | 0.95 | 0.12 | NM_009269.2 |
| 1700001P01Rik    | 31    | 0.95 | 0.15 | XM_126645.3 |



|               |      |      |      |              |  |
|---------------|------|------|------|--------------|--|
| A130038D03Rik | 63   | 0.95 | 0.17 | AK037693     |  |
| Ypel5         | 550  | 0.95 | 0.12 | NM_027166    |  |
| Al415330      | 680  | 0.95 | 0.12 | NM_178114    |  |
| Hexb          | 506  | 0.95 | 0.11 | NM_010422.1  |  |
| 4833413E03Rik | 30   | 0.95 | 0.18 | XM_358501.1  |  |
| Lrp8          | 405  | 0.95 | 0.17 | NM_053073.1  |  |
| Mia1          | 37   | 0.95 | 0.03 | NM_019394    |  |
| Tm7sf1        | 58   | 0.95 | 0.18 | NM_031999    |  |
| BC034090      | 555  | 0.95 | 0.26 | XM_148974.3  |  |
| Spata6        | 553  | 0.95 | 0.17 | NM_026470.2  |  |
| C230050J15Rik | 981  | 0.95 | 0.42 | AK048763     |  |
| Impact        | 2310 | 0.95 | 0.12 | NM_008378.1  |  |
| BC006779      | 201  | 0.95 | 0.03 | XM_485132    |  |
| Psmc1         | 7603 | 0.95 | 0.19 |              |  |
| Celsr1        | 144  | 0.95 | 0.13 | NM_009886.1  |  |
| LOC384337     | 158  | 0.95 | 0.21 | XM_357583.1  |  |
| BC035295      | 2447 | 0.95 | 0.13 | NM_153407.1  |  |
| Bsg           | 35   | 0.95 | 0.64 | NM_009768.1  |  |
| Kpnb3         | 746  | 0.95 | 0.09 | NM_023579.2  |  |
| Rffl          | 281  | 0.95 | 0.24 |              |  |
| 1600013E24Rik | 369  | 0.95 | 0.29 | AK005439     |  |
| LOC381529     | 142  | 0.95 | 0.26 | XM_355490.1  |  |
| Rab13         | 1594 | 0.95 | 0.05 | NM_026297.1  |  |
| Plcb3         | 295  | 0.95 | 0.04 | NM_008874.2  |  |
| LOC383940     | 131  | 0.95 | 0.57 | XM_357336.1  |  |
| 0610030E20Rik | 167  | 0.95 | 0.22 | XM_132614.3  |  |
| Xkr7          | 31   | 0.95 | 0.47 |              |  |
| Vps33b        | 231  | 0.95 | 0.09 | NM_178070.2  |  |
| Usp3          | 730  | 0.95 | 0.15 | NM_144937.2  |  |
| Dnmt3b        | 138  | 0.95 | 0.08 | NM_010068.1  |  |
| Ralgps1       | 195  | 0.95 | 0.11 | NM_175211    |  |
| Sec61a        | 34   | 0.95 | 0.26 | AK054318     |  |
| 2500001H09Rik | 49   | 0.95 | 0.26 | NM_029078    |  |
| LOC380701     | 65   | 0.95 | 0.34 | XM_354611.1  |  |
| 2610103N14Rik | 63   | 0.95 | 0.34 | AK011813     |  |
| Trpv4         | 83   | 0.95 | 0.06 | NM_022017.1  |  |
| 2610528A15Rik | 2584 | 0.95 | 0.15 | NM_028151.1  |  |
| Cds2          | 131  | 0.95 | 0.34 | NM_138651.2  |  |
| Rdh11         | 2824 | 0.95 | 0.14 | NM_021557    |  |
| Prickle1      | 207  | 0.95 | 0.15 | XM_128308.4  |  |
| Prdm4         | 4981 | 0.95 | 0.16 | XM_125812    |  |
| 2310008I22Rik | 435  | 0.95 | 0.14 | AK009232     |  |
| Slc2a8        | 77   | 0.95 | 0.11 | NM_019488.2  |  |
| Snai3         | 110  | 0.95 | 0.48 | NM_013914.2  |  |
| AU024582      | 1836 | 0.95 | 0.29 | NM_153125.1  |  |
| Rab33b        | 473  | 0.95 | 0.06 | NM_016858.1  |  |
| Ap4e1         | 236  | 0.95 | 0.20 | XM_485064    |  |
| Ccdc100       | 3390 | 0.95 | 0.10 |              |  |
| B130055D15Rik | 2954 | 0.95 | 0.05 | NM_178113.2  |  |
| 1700071A11Rik | 47   | 0.95 | 0.43 | XM_489271    |  |
| Hcn2          | 3037 | 0.95 | 0.20 | NM_008226.1  |  |
| Alg6          | 423  | 0.95 | 0.19 | NM_178784.2  |  |
| 1110020M19Rik | 257  | 0.95 | 0.06 | NM_027927.2  |  |
| Zfp764        | 133  | 0.95 | 0.22 |              |  |
| LOC227384     | 830  | 0.95 | 0.17 | XM_129974.3  |  |
| Ttyh1         | 266  | 0.95 | 0.05 | NM_001001454 |  |
| 9430067K14Rik | 95   | 0.95 | 0.18 | NM_175509.3  |  |
| AB182283      | 527  | 0.95 | 0.27 |              |  |
| 5830435C13Rik | 357  | 0.95 | 0.11 |              |  |
| Pkn1          | 71   | 0.95 | 0.05 | NM_177262    |  |
| Pogk          | 407  | 0.95 | 0.06 | NM_175170.2  |  |
| Olfir310      | 37   | 0.95 | 0.12 |              |  |
| Tnfai3        | 37   | 0.95 | 0.24 | NM_134131.1  |  |
| Suhw2         | 436  | 0.95 | 0.39 | NM_177475.2  |  |
| Atp6v1c1      | 1825 | 0.95 | 0.06 | NM_025494    |  |
| 6330407G11Rik | 6656 | 0.95 | 0.05 | XM_124343.1  |  |
| LOC383347     | 50   | 0.95 | 0.35 | XM_356997.1  |  |
| Faim2         | 279  | 0.95 | 0.09 | NM_028224.2  |  |

|                  |       |      |      |             |      |
|------------------|-------|------|------|-------------|------|
| Rab11fip3        | 916   | 0.95 | 0.20 | NM_153140.1 |      |
| Tada3l           | 133   | 0.95 | 0.09 | NM_133932.1 |      |
| 2700008N14Rik    | 352   | 0.95 | 0.11 | XM_109880.4 |      |
| EG665378         | 195   | 0.94 | 0.17 |             |      |
| 4930455F23Rik    | 3105  | 0.94 | 0.04 | NM_029115   |      |
| Ddx50            | 1159  | 0.94 | 0.12 | NM_053183.1 |      |
| E130102H24Rik    | 269   | 0.94 | 0.11 | XM_149469.3 |      |
| BC027309         | 192   | 0.94 | 0.09 | NM_177736   |      |
| 2810457M08Rik    | 154   | 0.94 | 0.06 | NM_172284.1 |      |
| Dok4             | 61    | 0.94 | 0.20 | NM_053246.1 |      |
| Lrsam1           | 92    | 0.94 | 0.06 | NM_199302.1 |      |
| Wdr10            | 349   | 0.94 | 0.17 | NM_031177.1 |      |
| 9430093l07Rik    | 320   | 0.94 | 0.17 |             |      |
| 0610031G08Rik    | 59    | 0.94 | 0.22 |             |      |
| LOC215879        | 814   | 0.94 | 0.22 | XM_121997.2 |      |
| Ctdp1            | 139   | 0.94 | 0.02 | NM_026295.2 |      |
| Cpe              | 16735 | 0.94 | 0.14 | NM_013494.2 |      |
| 5330431K02Rik    | 2012  | 0.94 | 0.07 | NM_026606.1 |      |
| Casp2            | 2418  | 0.94 | 0.25 | NM_007610.1 |      |
| Large            | 438   | 0.94 | 0.25 | AK078444    |      |
| Trb              | 241   | 0.94 | 0.31 | AK077789    |      |
| Eif4a2           | 4973  | 0.94 | 0.10 | NM_013506   |      |
| MGC67181         | 32    | 0.94 | 0.08 | NM_198619   |      |
| Polk             | 443   | 0.94 | 0.12 | NM_012048.1 |      |
| Slc31a1          | 1231  | 0.94 | 0.06 | NM_175090.2 | Ctrl |
| Lig1             | 1210  | 0.94 | 0.03 | NM_010715.1 |      |
| C130019M09Rik    | 50    | 0.94 | 0.09 | AK081472    |      |
| Hira             | 102   | 0.94 | 0.23 | NM_010435.1 |      |
| BC038286         | 6105  | 0.94 | 0.20 | NM_170755.1 |      |
| 1300019J08Rik    | 180   | 0.94 | 0.17 | XM_125854.2 |      |
| 1810062O14Rik    | 50    | 0.94 | 0.14 | NM_178650.2 |      |
| Dars             | 4207  | 0.94 | 0.08 | NM_145507.1 |      |
| Olfr168          | 40    | 0.94 | 0.21 | NM_146357.1 |      |
| Egfl5            | 423   | 0.94 | 0.09 | NM_172694.1 |      |
| Ribc1            | 652   | 0.94 | 0.23 | NM_025660.1 |      |
| D230047F17Rik    | 93    | 0.94 | 0.24 | AK084442    |      |
| LOC385236        | 38    | 0.94 | 0.38 | XM_358135.1 |      |
| Dhcr7            | 151   | 0.94 | 0.37 | NM_007856.2 |      |
| Lats1            | 125   | 0.94 | 0.10 | XM_194716.2 |      |
| C430014D17Rik    | 258   | 0.94 | 0.34 | NM_139304   |      |
| Lars             | 6626  | 0.94 | 0.08 | XM_357008.1 |      |
| Spg4             | 828   | 0.94 | 0.09 | NM_016962   |      |
| LOC229875        | 32    | 0.94 | 0.23 | XM_131256.3 |      |
| Vps26            | 1875  | 0.94 | 0.05 | NM_133672.1 |      |
| 2610300B10Rik    | 1701  | 0.94 | 0.13 | XM_283661   |      |
| scl000605.1_87   | 47    | 0.94 | 0.16 |             |      |
| Cblb             | 251   | 0.94 | 0.14 | XM_358863.1 |      |
| Mll              | 3448  | 0.94 | 0.09 | XM_110671.2 |      |
| A430069M06Rik    | 82    | 0.94 | 0.09 | AK040145    |      |
| Tdrd7            | 1095  | 0.94 | 0.12 | NM_146142.1 |      |
| 1700028G04Rik    | 33    | 0.94 | 0.27 | AK006458    |      |
| 2810407P21Rik    | 1357  | 0.94 | 0.10 | XM_132150.5 |      |
| 1110070O15Rik    | 221   | 0.94 | 0.13 | AK075684    |      |
| Pcnx13           | 53    | 0.94 | 0.37 | NM_144868   |      |
| Btd              | 131   | 0.94 | 0.31 | NM_025295.1 |      |
| Al255170         | 65    | 0.94 | 0.33 | XM_128733.4 |      |
| 4933428G20Rik    | 108   | 0.94 | 0.33 | NM_021493.1 |      |
| Clock            | 1295  | 0.94 | 0.17 | NM_007715.4 |      |
| D030034l04Rik    | 781   | 0.94 | 0.11 | AK050914    |      |
| LOC382210        | 479   | 0.94 | 0.27 | XM_356322.1 |      |
| 9330159F19Rik    | 174   | 0.94 | 0.30 | XM_137017.3 |      |
| Zfp128           | 31    | 0.94 | 0.28 | NM_153802   |      |
| LOC381981        | 89    | 0.94 | 0.20 | XM_356027.1 |      |
| 2810405l11Rik    | 905   | 0.94 | 0.03 | NM_024190   |      |
| scl0001076.1_117 | 66    | 0.94 | 0.46 |             |      |
| 2810451E09Rik    | 40    | 0.94 | 0.43 |             |      |
| Dhrs4            | 30    | 0.94 | 0.32 | NM_030686.1 |      |
| D430042O09Rik    | 281   | 0.94 | 0.21 | AK052528    |      |

|                  |       |      |      |             |  |
|------------------|-------|------|------|-------------|--|
| LOC381684        | 102   | 0.94 | 0.23 | XM_355660.1 |  |
| Marveld3         | 95    | 0.94 | 0.24 | NM_028584.1 |  |
| 4932416N17Rik    | 189   | 0.94 | 0.02 | XM_359229   |  |
| 1110008P08Rik    | 651   | 0.94 | 0.29 |             |  |
| scl0001627.1_140 | 620   | 0.94 | 0.33 |             |  |
| 1810011E08Rik    | 1444  | 0.94 | 0.32 | AK007432    |  |
| Mapk6            | 1109  | 0.94 | 0.08 | NM_015806.2 |  |
| Mapkapk2         | 208   | 0.94 | 0.15 | NM_008551.1 |  |
| Rdh7             | 38    | 0.94 | 0.36 | NM_017473.1 |  |
| Actr6            | 109   | 0.94 | 0.15 | NM_025914.1 |  |
| Rfwd3            | 563   | 0.94 | 0.10 |             |  |
| Sdk1             | 725   | 0.94 | 0.10 | NM_177879.3 |  |
| 1110057K04Rik    | 1250  | 0.94 | 0.02 | NM_172401.2 |  |
| Mreg             | 1993  | 0.94 | 0.14 |             |  |
| Nfib             | 741   | 0.94 | 0.23 | Y07685      |  |
| Top2a            | 1320  | 0.94 | 0.13 | NM_011623.1 |  |
| AU014645         | 2071  | 0.94 | 0.03 |             |  |
| B430108F07Rik    | 51    | 0.94 | 0.39 | NM_175275.2 |  |
| 9530019D23Rik    | 30    | 0.94 | 0.38 | AK035337    |  |
| Seh1l            | 355   | 0.94 | 0.12 | NM_028112.1 |  |
| lsgf3g           | 78    | 0.94 | 0.18 | NM_008394.2 |  |
| Clk1             | 772   | 0.94 | 0.03 | NM_009905.1 |  |
| Pcdhb4           | 49    | 0.94 | 0.33 | NM_053129.2 |  |
| Elavl3           | 372   | 0.94 | 0.42 | NM_010487.1 |  |
| AW046396         | 1410  | 0.94 | 0.39 | NM_177836.2 |  |
| Cacng7           | 66    | 0.94 | 0.53 | NM_133189   |  |
| Tial1            | 195   | 0.94 | 0.10 | NM_009383   |  |
| Cacna1a          | 72    | 0.94 | 0.33 | NM_007578   |  |
| Caskin2          | 395   | 0.94 | 0.20 | NM_080643   |  |
| 3002006F17Rik    | 2121  | 0.94 | 0.10 | AK028251    |  |
| 9430023B20Rik    | 577   | 0.94 | 0.34 | NM_177595.2 |  |
| Khdrbs1          | 1845  | 0.94 | 0.06 | NM_011317.2 |  |
| E430026A01Rik    | 1475  | 0.94 | 0.13 | XM_132514.4 |  |
| Rtp2             | 2011  | 0.94 | 0.11 |             |  |
| Kcnp3            | 408   | 0.94 | 0.19 |             |  |
| Srp72            | 698   | 0.94 | 0.23 | XM_132143.3 |  |
| D15Ert621e       | 4439  | 0.94 | 0.32 | NM_145959.1 |  |
| Brwd1            | 807   | 0.94 | 0.10 |             |  |
| Cugbp2           | 517   | 0.94 | 0.08 | NM_010160.1 |  |
| Ndst2            | 359   | 0.94 | 0.14 | NM_010811.1 |  |
| Csnk1g1          | 251   | 0.94 | 0.14 | NM_173185   |  |
| 2210409D07Rik    | 30    | 0.94 | 0.20 | XM_358519.1 |  |
| C330016H24Rik    | 319   | 0.94 | 0.14 | NM_026563   |  |
| 9330133O14Rik    | 31    | 0.94 | 0.10 | NM_176948.2 |  |
| Clasp1           | 124   | 0.94 | 0.30 |             |  |
| Eftud1           | 363   | 0.94 | 0.12 | NM_175317.2 |  |
| Olfir1112        | 31    | 0.94 | 0.44 | NM_146661.1 |  |
| Rhobtb3          | 869   | 0.94 | 0.30 | NM_028493.1 |  |
| Cnksr1           | 173   | 0.94 | 0.04 | XM_110525.3 |  |
| D430015B01Rik    | 73    | 0.94 | 0.38 | NM_153574   |  |
| Icosl            | 37    | 0.94 | 0.29 | NM_015790.2 |  |
| 2210412K09Rik    | 389   | 0.94 | 0.08 | NM_029814.1 |  |
| 4732477C12Rik    | 10393 | 0.94 | 0.09 |             |  |
| Csrp2            | 70    | 0.94 | 0.16 | NM_007792.2 |  |
| scl0001534.1_16  | 95    | 0.94 | 0.22 |             |  |
| Hnrph2           | 65    | 0.94 | 0.25 | NM_019868.2 |  |
| 6820449I09Rik    | 1596  | 0.94 | 0.13 | NM_177128.2 |  |
| E130308A19Rik    | 115   | 0.94 | 0.08 | NM_153158.1 |  |
| AI449175         | 264   | 0.94 | 0.07 | NM_172754.1 |  |
| 0710007C18Rik    | 41    | 0.94 | 0.30 | AK003009    |  |
| Swap70           | 63    | 0.94 | 0.06 | AK045295    |  |
| Mtmr3            | 121   | 0.94 | 0.08 | NM_028860.1 |  |
| 4930579J09Rik    | 35    | 0.94 | 0.12 | NM_133689   |  |
| 2900052P03Rik    | 155   | 0.94 | 0.07 |             |  |
| Ptpns1           | 1529  | 0.94 | 0.11 | XM_149178.1 |  |
| LOC216443        | 4018  | 0.94 | 0.17 | XM_125952.4 |  |
| A530082C11Rik    | 477   | 0.94 | 0.18 | NM_177186.3 |  |
| 1110067D22Rik    | 219   | 0.94 | 0.29 | NM_173752   |  |

|                 |      |      |      |             |  |
|-----------------|------|------|------|-------------|--|
| D12Wsu95e       | 2062 | 0.94 | 0.22 | NM_198023.1 |  |
| LOC381525       | 43   | 0.94 | 0.22 | XM_355485.1 |  |
| Klf3            | 378  | 0.94 | 0.05 | NM_008453   |  |
| Hsd3b7          | 2418 | 0.94 | 0.04 | NM_133943   |  |
| Pcdhb7          | 91   | 0.94 | 0.08 | NM_053132.2 |  |
| Ncapd2          | 703  | 0.94 | 0.07 |             |  |
| LOC381010       | 32   | 0.94 | 0.40 | XM_354919.1 |  |
| 2610304G08Rik   | 417  | 0.94 | 0.02 | NM_027434   |  |
| D930008O12Rik   | 36   | 0.94 | 0.26 |             |  |
| Capn9           | 129  | 0.94 | 0.19 | NM_023709.2 |  |
| Son             | 258  | 0.94 | 0.22 | NM_019973.1 |  |
| Socs4           | 614  | 0.94 | 0.05 | NM_080843.1 |  |
| Map3k1          | 1641 | 0.94 | 0.10 | NM_011945.1 |  |
| Cpeb3           | 414  | 0.94 | 0.15 | NM_198300   |  |
| D130059O18Rik   | 219  | 0.94 | 0.12 | AK051608    |  |
| Epb4.114b       | 683  | 0.94 | 0.06 | NM_019427   |  |
| Gm833           | 144  | 0.94 | 0.02 |             |  |
| C430014N20Rik   | 532  | 0.94 | 0.24 | XM_136108.3 |  |
| D030051N19Rik   | 334  | 0.94 | 0.14 | NM_172669   |  |
| scl0003976.1_30 | 178  | 0.94 | 0.09 |             |  |
| A530090C09Rik   | 133  | 0.94 | 0.03 | AK041201    |  |
| Dub1a           | 41   | 0.94 | 0.30 | NM_201409.1 |  |
| LOC245545       | 37   | 0.94 | 0.14 | XM_141989.3 |  |
| Ercc4           | 117  | 0.94 | 0.22 | AK043366    |  |
| Scmh1           | 302  | 0.94 | 0.07 | NM_013883.1 |  |
| Brms1l          | 1507 | 0.94 | 0.02 | NM_027867.2 |  |
| Camkk2          | 123  | 0.94 | 0.12 | NM_145358.1 |  |
| D11Etd18e       | 101  | 0.94 | 0.34 | NM_026740.1 |  |
| Cyb5r4          | 975  | 0.94 | 0.07 |             |  |
| Fbxl17          | 667  | 0.94 | 0.17 | XM_128716.2 |  |
| AK122209        | 345  | 0.94 | 0.04 |             |  |
| Olfir206        | 52   | 0.94 | 0.20 | NM_146991.1 |  |
| A030009H04Rik   | 71   | 0.94 | 0.12 | NM_020591.1 |  |
| 9330112E13Rik   | 2080 | 0.94 | 0.21 | AK033896    |  |
| Tfpi            | 48   | 0.94 | 0.12 | NM_011576   |  |
| Uble1b          | 3208 | 0.94 | 0.03 |             |  |
| BC024063        | 36   | 0.94 | 0.16 | XM_483927   |  |
| 5930434B04Rik   | 328  | 0.94 | 0.09 | XM_355322   |  |
| A130022A09Rik   | 220  | 0.94 | 0.22 | AK037499    |  |
| Sh3glb1         | 483  | 0.94 | 0.09 | NM_019464.1 |  |
| Cfl2            | 238  | 0.94 | 0.06 | NM_007688.1 |  |
| Tbc1d5          | 647  | 0.94 | 0.21 | NM_028162.2 |  |
| Ppil6           | 178  | 0.94 | 0.29 |             |  |
| 2610028H07Rik   | 1152 | 0.94 | 0.13 | AK011590    |  |
| LOC230765       | 595  | 0.94 | 0.14 |             |  |
| V1rc33          | 31   | 0.94 | 0.25 | NM_134436.1 |  |
| Golga1          | 698  | 0.94 | 0.13 | NM_029793.1 |  |
| Ppp2r5a         | 1924 | 0.94 | 0.19 | NM_144880.1 |  |
| Nr4a2           | 635  | 0.94 | 0.24 | NM_013613   |  |
| AW544865        | 250  | 0.94 | 0.40 | NM_178918.2 |  |
| Ppp1r12a        | 673  | 0.94 | 0.15 | XM_137239.3 |  |
| LOC242555       | 51   | 0.94 | 0.48 | XM_143909.3 |  |
| Kif1b           | 891  | 0.94 | 0.05 | NM_008441.1 |  |
| Depdc5          | 90   | 0.94 | 0.06 | NM_177786.2 |  |
| Gabarapl2       | 61   | 0.94 | 0.22 | NM_026693.2 |  |
| Prrt3           | 1107 | 0.94 | 0.19 |             |  |
| Rnf19           | 6692 | 0.94 | 0.08 | NM_013923.1 |  |
| 9930012K11Rik   | 51   | 0.94 | 0.52 | XM_193767.2 |  |
| Dgke            | 138  | 0.94 | 0.29 | NM_019505.1 |  |
| Kif3b           | 335  | 0.94 | 0.08 | NM_008444.2 |  |
| Ap1g1           | 384  | 0.94 | 0.07 | NM_009677   |  |
| Ckap2           | 1302 | 0.94 | 0.07 | XM_134100.3 |  |
| Tbk1            | 4493 | 0.94 | 0.16 | NM_019786.2 |  |
| Mycbpap         | 333  | 0.94 | 0.01 | NM_170671.1 |  |
| Spag5           | 814  | 0.94 | 0.21 | NM_017407.1 |  |
| Gpkow           | 120  | 0.94 | 0.10 | NM_173747.2 |  |
| 1520402A20Rik   | 69   | 0.94 | 0.03 | AK028065    |  |
| Casp3           | 64   | 0.94 | 0.12 | AK014231    |  |

|                  |      |      |      |             |  |
|------------------|------|------|------|-------------|--|
| Thoc1            | 566  | 0.94 | 0.19 | NM_153552.2 |  |
| Man2c1           | 1036 | 0.94 | 0.11 | NM_028636.1 |  |
| Zfp382           | 169  | 0.94 | 0.17 |             |  |
| LOC381826        | 77   | 0.94 | 0.28 | XM_355827.1 |  |
| Smtn             | 96   | 0.93 | 0.09 | NM_013870.1 |  |
| Siah1a           | 254  | 0.93 | 0.21 | NM_009172.1 |  |
| Btbd4            | 307  | 0.93 | 0.14 | NM_028125   |  |
| A930016D02Rik    | 30   | 0.93 | 0.37 | NM_176920.2 |  |
| Mtap6            | 126  | 0.93 | 0.10 | AK087413    |  |
| LOC381757        | 36   | 0.93 | 0.12 | XM_355752.1 |  |
| Leng1            | 52   | 0.93 | 0.18 | NM_027203.2 |  |
| Shank3           | 61   | 0.93 | 0.25 | NM_021423.1 |  |
| Phyhip           | 31   | 0.93 | 0.16 | NM_145981.1 |  |
| Sdccag1          | 361  | 0.93 | 0.25 | NM_181665.1 |  |
| Ikbkap           | 522  | 0.93 | 0.25 | NM_026079.1 |  |
| 6230400I06Rik    | 908  | 0.93 | 0.27 |             |  |
| 6330444G18Rik    | 365  | 0.93 | 0.37 | AK078102    |  |
| 2600001J17Rik    | 611  | 0.93 | 0.17 | NM_027411.1 |  |
| Prkcz            | 1076 | 0.93 | 0.17 | NM_008860   |  |
| Cep63            | 284  | 0.93 | 0.18 |             |  |
| Wfikkn1          | 45   | 0.93 | 0.09 | XM_128578.2 |  |
| Ovgp1            | 31   | 0.93 | 0.47 | NM_007696.2 |  |
| Epc2             | 1751 | 0.93 | 0.20 | NM_172663.2 |  |
| B230363H02Rik    | 823  | 0.93 | 0.03 | AK046269    |  |
| 1190009E20Rik    | 1173 | 0.93 | 0.06 |             |  |
| Rnmt             | 269  | 0.93 | 0.09 | NM_026440.2 |  |
| D930050A07Rik    | 48   | 0.93 | 0.22 |             |  |
| 2810030E01Rik    | 65   | 0.93 | 0.12 | XM_140828.4 |  |
| Wasf2            | 1433 | 0.93 | 0.27 | NM_153423   |  |
| Ctbp2            | 325  | 0.93 | 0.06 | BC017520    |  |
| 5330416C01Rik    | 98   | 0.93 | 0.10 | NM_207528   |  |
| Zfp598           | 200  | 0.93 | 0.20 | NM_183149.1 |  |
| BC008163         | 899  | 0.93 | 0.23 | NM_145553.1 |  |
| Tuba1            | 6275 | 0.93 | 0.23 | NM_011653   |  |
| scl0002879.1_64  | 37   | 0.93 | 0.21 |             |  |
| Rbm6             | 188  | 0.93 | 0.13 | NM_011251.1 |  |
| Vps11            | 213  | 0.93 | 0.23 | XM_134794.3 |  |
| Ptpn9            | 56   | 0.93 | 0.18 | NM_019651   |  |
| Ppox             | 149  | 0.93 | 0.09 | NM_008911.1 |  |
| 5830431I15Rik    | 69   | 0.93 | 0.06 | AK017959    |  |
| Rbbp4            | 1016 | 0.93 | 0.06 | NM_009030   |  |
| Rel              | 31   | 0.93 | 1.05 | NM_009044.1 |  |
| scl000073.1_22_F | 82   | 0.93 | 0.41 |             |  |
| Gpt2             | 1698 | 0.93 | 0.23 | NM_173866.1 |  |
| Tmprss4          | 823  | 0.93 | 0.10 | NM_145403.1 |  |
| Dvl1             | 1692 | 0.93 | 0.15 | NM_010091.2 |  |
| 2610203E10Rik    | 346  | 0.93 | 0.05 | NM_183220   |  |
| D14Ert668e       | 43   | 0.93 | 0.31 | NM_199015.1 |  |
| 9030205A07Rik    | 815  | 0.93 | 0.11 | XM_484173   |  |
| Timp3            | 110  | 0.93 | 0.17 | NM_011595.1 |  |
| 6330505F04Rik    | 329  | 0.93 | 0.18 | NM_172779.1 |  |
| Ctnna1           | 8196 | 0.93 | 0.03 |             |  |
| Psm5             | 389  | 0.93 | 0.12 | NM_080554.1 |  |
| LOC384349        | 276  | 0.93 | 0.33 | XM_357594.1 |  |
| LOC218726        | 61   | 0.93 | 0.28 | XM_127573.4 |  |
| Hel308           | 244  | 0.93 | 0.19 | XM_132236   |  |
| 4732441L20Rik    | 51   | 0.93 | 0.27 | XM_485425   |  |
| Bcr              | 107  | 0.93 | 0.09 | XM_125706.5 |  |
| 2210409E12Rik    | 174  | 0.93 | 0.28 | NM_028218.1 |  |
| A230048G03Rik    | 56   | 0.93 | 0.29 | NM_177332.2 |  |
| Cacng4           | 415  | 0.93 | 0.15 | NM_019431.1 |  |
| Socs5            | 312  | 0.93 | 0.16 | NM_019654.2 |  |
| Pprc1            | 1248 | 0.93 | 0.36 | XM_359412.1 |  |
| Prkch            | 161  | 0.93 | 0.08 | NM_008856.2 |  |
| Tmod4            | 131  | 0.93 | 0.08 | NM_016712.1 |  |
| Ing3             | 338  | 0.93 | 0.03 | NM_023626.3 |  |
| Dcbl2            | 165  | 0.93 | 0.36 | NM_028523   |  |
| Elf2c3           | 66   | 0.93 | 0.23 | NM_153402   |  |

|               |      |      |      |              |  |
|---------------|------|------|------|--------------|--|
| Rasa2         | 149  | 0.93 | 0.31 | AK082530     |  |
| Pcdhb22       | 231  | 0.93 | 0.12 | NM_053147.2  |  |
| 4930420O11Rik | 86   | 0.93 | 0.08 | AK044801     |  |
| Nrd1          | 9254 | 0.93 | 0.15 | NM_146150.2  |  |
| A430079D01Rik | 33   | 0.93 | 0.26 | AK079833     |  |
| 6330407J23Rik | 491  | 0.93 | 0.21 | NM_026138.1  |  |
| BC042513      | 59   | 0.93 | 0.14 | NM_173388    |  |
| Lgals8        | 473  | 0.93 | 0.16 | NM_018886.2  |  |
| Ndst1         | 394  | 0.93 | 0.07 | NM_008306    |  |
| Kctd3         | 1158 | 0.93 | 0.19 | NM_172650.2  |  |
| Tubgcp2       | 2638 | 0.93 | 0.08 | NM_133755.1  |  |
| 1110067B18Rik | 170  | 0.93 | 0.08 |              |  |
| Lrrc5         | 5829 | 0.93 | 0.11 | NM_178701.2  |  |
| Nolc1         | 67   | 0.93 | 0.31 | NM_053086.1  |  |
| Ube4b         | 2111 | 0.93 | 0.07 | NM_022022.1  |  |
| 8430427H17Rik | 316  | 0.93 | 0.10 | NM_001001986 |  |
| Zfp41         | 792  | 0.93 | 0.07 | NM_011759.1  |  |
| C80913        | 992  | 0.93 | 0.04 | NM_011274.2  |  |
| 2900045N06Rik | 603  | 0.93 | 0.25 | NM_028385.1  |  |
| Kifc2         | 37   | 0.93 | 0.32 | NM_010630.1  |  |
| Mmp1a         | 45   | 0.93 | 0.18 | NM_032006.2  |  |
| Cdc42ep3      | 1862 | 0.93 | 0.10 | NM_026514    |  |
| D930005D10Rik | 41   | 0.93 | 0.26 | NM_178702.2  |  |
| AF233884      | 481  | 0.93 | 0.15 | NM_021315.1  |  |
| Mdh1b         | 584  | 0.93 | 0.04 | NM_029696.2  |  |
| 4930432J16Rik | 281  | 0.93 | 0.19 | XM_148426.2  |  |
| 9330102E08Rik | 63   | 0.93 | 0.30 | XM_489154    |  |
| 1110001A05Rik | 46   | 0.93 | 0.14 | NM_022554.1  |  |
| Hsn2          | 38   | 0.93 | 0.28 |              |  |
| Cct6b         | 37   | 0.93 | 0.56 | NM_009839.1  |  |
| Enpp2         | 94   | 0.93 | 0.08 | NM_015744    |  |
| 1110067I12Rik | 45   | 0.93 | 0.17 | XM_484769    |  |
| Ccdc2         | 71   | 0.93 | 0.14 | NM_026319.1  |  |
| Ush1g         | 526  | 0.93 | 0.12 | NM_176847.2  |  |
| D5Erttd606e   | 7145 | 0.93 | 0.03 |              |  |
| 4930563E22Rik | 73   | 0.93 | 0.14 | AK043242     |  |
| Ddx19         | 164  | 0.93 | 0.51 | NM_007916.1  |  |
| C130076O07Rik | 873  | 0.93 | 0.03 | AK048567     |  |
| Freq          | 70   | 0.93 | 0.05 | NM_019681    |  |
| Tube1         | 158  | 0.93 | 0.18 | XM_125543.4  |  |
| Ncoa1         | 219  | 0.93 | 0.29 | NM_010881    |  |
| Slk           | 1064 | 0.93 | 0.20 |              |  |
| 4933412A02Rik | 256  | 0.93 | 0.26 | AK016783     |  |
| Abca2         | 302  | 0.93 | 0.24 | NM_007379.1  |  |
| Rbmy1a1       | 56   | 0.93 | 0.19 | NM_011253.1  |  |
| 5730455P16Rik | 269  | 0.93 | 0.05 | XM_126361.2  |  |
| Slc30a4       | 86   | 0.93 | 0.11 | NM_011774    |  |
| Spcs3         | 2743 | 0.93 | 0.28 |              |  |
| A730004F22Rik | 508  | 0.93 | 0.30 |              |  |
| Gpr85         | 186  | 0.93 | 0.19 | NM_145066    |  |
| Picalm        | 1134 | 0.93 | 0.18 | NM_146194    |  |
| LOC386112     | 439  | 0.93 | 0.18 | XM_359073.1  |  |
| 4930427E19Rik | 43   | 0.93 | 0.13 | AK015210     |  |
| Mfap1b        | 2326 | 0.93 | 0.11 |              |  |
| Pvrl2         | 205  | 0.93 | 0.27 | NM_008990.2  |  |
| Cask          | 2164 | 0.93 | 0.12 | NM_009806    |  |
| A930008K15Rik | 65   | 0.93 | 0.15 | XM_130065.4  |  |
| F630107L03Rik | 155  | 0.93 | 0.06 | AK089261     |  |
| F730003H07Rik | 668  | 0.93 | 0.05 | AK089303     |  |
| 2010013E08Rik | 56   | 0.93 | 0.40 | NM_175152.2  |  |
| Stk11ip       | 313  | 0.93 | 0.09 | NM_027886.2  |  |
| 4930512K19Rik | 87   | 0.93 | 0.32 | AK015776     |  |
| Serpnb6c      | 44   | 0.93 | 0.12 | NM_148942.1  |  |
| 8030404L10Rik | 118  | 0.93 | 0.14 |              |  |
| Gprk6         | 315  | 0.93 | 0.12 | NM_011938    |  |
| Oxct          | 3523 | 0.93 | 0.12 | AK010029     |  |
| Camk2a        | 53   | 0.93 | 0.10 | NM_009792.1  |  |
| Hdlbp         | 2375 | 0.93 | 0.24 | NM_133808.2  |  |

|               |      |      |      |             |  |
|---------------|------|------|------|-------------|--|
| LOC384292     | 32   | 0.93 | 0.34 | XM_357548.1 |  |
| LOC384307     | 78   | 0.93 | 0.13 | XM_357558.1 |  |
| Cit           | 87   | 0.93 | 0.12 | NM_007708.1 |  |
| Ttc3          | 4738 | 0.93 | 0.07 | NM_009441.1 |  |
| Kcnh2         | 800  | 0.93 | 0.12 | NM_013569.1 |  |
| C730029F17Rik | 512  | 0.93 | 0.32 | AK050233    |  |
| Rnf44         | 5724 | 0.93 | 0.15 | NM_134064.1 |  |
| Epn1          | 44   | 0.93 | 0.34 | NM_010147   |  |
| Slc25a17      | 1451 | 0.93 | 0.04 | NM_011399.1 |  |
| Rgs9          | 1449 | 0.93 | 0.14 | NM_011268.1 |  |
| Slc43a1       | 233  | 0.93 | 0.07 | XM_130259.4 |  |
| Guca1b        | 47   | 0.93 | 0.17 | NM_146079.1 |  |
| Ttf2          | 371  | 0.93 | 0.13 | XM_131118   |  |
| LOC382050     | 143  | 0.93 | 0.22 | XM_356123.1 |  |
| Lta4h         | 104  | 0.93 | 0.10 | NM_008517.1 |  |
| Mepe          | 44   | 0.93 | 0.03 | NM_053172.1 |  |
| Dhdh1         | 235  | 0.93 | 0.08 | NM_176845   |  |
| 1810044O22Rik | 4568 | 0.93 | 0.08 | NM_025558.2 |  |
| Rala          | 95   | 0.93 | 0.15 | NM_019491.4 |  |
| Ivd           | 421  | 0.93 | 0.11 | NM_019826   |  |
| Cdk2          | 2231 | 0.93 | 0.14 | NM_016756.1 |  |
| C430010C01    | 35   | 0.93 | 0.67 |             |  |
| Triobp        | 3263 | 0.93 | 0.18 | NM_138579.2 |  |
| Mapk14        | 2229 | 0.93 | 0.11 | NM_011951   |  |
| Dnchc1        | 2711 | 0.93 | 0.13 | NM_030238.1 |  |
| AW539964      | 1456 | 0.93 | 0.16 | NM_173432.2 |  |
| Tulp4         | 3348 | 0.93 | 0.16 | NM_054040.1 |  |
| Lmyc1         | 1028 | 0.93 | 0.18 | NM_008506.2 |  |
| Zw10          | 353  | 0.93 | 0.10 | NM_012039.1 |  |
| Rassf3        | 86   | 0.93 | 0.22 | NM_138956   |  |
| Nlgn2         | 513  | 0.93 | 0.09 | NM_198862.1 |  |
| Mcph1         | 209  | 0.93 | 0.12 | NM_173189.2 |  |
| BC037708      | 1134 | 0.93 | 0.11 | NM_172150   |  |
| LOC330052     | 85   | 0.93 | 0.25 |             |  |
| Galnt11       | 1672 | 0.93 | 0.15 | NM_144908.1 |  |
| Ildr1         | 277  | 0.93 | 0.04 |             |  |
| 4632417K18Rik | 2649 | 0.93 | 0.18 | NM_026640.1 |  |
| 5730489J12Rik | 416  | 0.93 | 0.14 | AK017714    |  |
| 1300006C19Rik | 9991 | 0.93 | 0.06 | AK018758    |  |
| Kbtbd2        | 2368 | 0.93 | 0.24 | NM_145958.1 |  |
| Pole          | 319  | 0.93 | 0.17 | NM_011132.1 |  |
| LOC385935     | 60   | 0.93 | 0.03 | XM_359005.1 |  |
| 1700021K19Rik | 1473 | 0.93 | 0.03 | NM_172615.1 |  |
| Herc1         | 112  | 0.93 | 0.13 | XM_358383.1 |  |
| Ndrp1         | 3127 | 0.93 | 0.15 | NM_010884.1 |  |
| Tgfb1i4       | 675  | 0.93 | 0.12 | NM_207652.1 |  |
| LOC237459     | 73   | 0.93 | 0.37 | XM_137290.1 |  |
| 1110064N10Rik | 1014 | 0.93 | 0.03 | NM_026396.2 |  |
| Mbd4          | 246  | 0.93 | 0.09 | NM_010774.1 |  |
| 2810402K13Rik | 485  | 0.93 | 0.21 |             |  |
| 1700039D13Rik | 74   | 0.93 | 0.47 | XM_126497.3 |  |
| Zbed4         | 603  | 0.93 | 0.25 | NM_181412.2 |  |
| LOC332175     | 40   | 0.93 | 0.50 | XM_285173.2 |  |
| Chpt1         | 100  | 0.93 | 0.10 | NM_144807.2 |  |
| Pfkip         | 3096 | 0.93 | 0.15 | NM_019703   |  |
| 5830411G16Rik | 2319 | 0.93 | 0.23 | XM_132538.3 |  |
| Luc7l2        | 384  | 0.93 | 0.09 | NM_138680   |  |
| Nppb          | 4069 | 0.93 | 0.11 | NM_008726.2 |  |
| LOC386192     | 1855 | 0.93 | 0.11 | XM_359111.1 |  |
| LOC381269     | 468  | 0.93 | 0.26 | XM_355212.1 |  |
| Sh3md2        | 163  | 0.93 | 0.19 | NM_198678.1 |  |
| Wdr45         | 519  | 0.93 | 0.15 |             |  |
| Zfand6        | 957  | 0.93 | 0.17 |             |  |
| Foxm1         | 297  | 0.93 | 0.16 | NM_008021.2 |  |
| Myt1l         | 92   | 0.93 | 0.10 | AK012660    |  |
| C130021I20    | 452  | 0.93 | 0.28 | NM_177842.2 |  |
| D15Ert528e    | 99   | 0.93 | 0.16 |             |  |
| Cenpj         | 181  | 0.93 | 0.50 | XM_127861.2 |  |

|                  |      |      |      |             |  |
|------------------|------|------|------|-------------|--|
| Centb1           | 34   | 0.93 | 0.37 | NM_153788.2 |  |
| AU040829         | 386  | 0.93 | 0.11 | NM_175003.2 |  |
| Wdt3-pending     | 652  | 0.93 | 0.14 | XM_282971.1 |  |
| Mbtps1           | 410  | 0.93 | 0.05 | AK002809    |  |
| Abca7            | 1030 | 0.93 | 0.26 | NM_013850.1 |  |
| scl0001709.1_980 | 1327 | 0.93 | 0.17 |             |  |
| Miz1             | 271  | 0.93 | 0.13 | NM_008602   |  |
| Zfp202           | 448  | 0.93 | 0.18 | NM_030713.1 |  |
| Wdr5b            | 64   | 0.93 | 0.16 | NM_027113   |  |
| Cnm3             | 153  | 0.93 | 0.11 | NM_053186.1 |  |
| 2310051N18Rik    | 341  | 0.93 | 0.18 | XM_134026.4 |  |
| Dnajc13          | 1201 | 0.93 | 0.04 | XM_135146.4 |  |
| LOC381632        | 1277 | 0.93 | 0.15 | XM_355597.1 |  |
| Thra             | 204  | 0.93 | 0.31 | NM_178060.2 |  |
| Cpa4             | 33   | 0.93 | 0.32 | NM_027926.1 |  |
| Foxj3            | 596  | 0.93 | 0.05 |             |  |
| Zzef1            | 384  | 0.93 | 0.31 | XM_111053   |  |
| Ppp1r13b         | 189  | 0.93 | 0.17 | NM_011625.1 |  |
| 4432406C08Rik    | 31   | 0.93 | 0.96 | XM_149937.3 |  |
| Tbc1d17          | 516  | 0.93 | 0.15 | NM_144924   |  |
| Mtap1b           | 1111 | 0.92 | 0.04 | NM_008634.1 |  |
| 1810055E12Rik    | 491  | 0.92 | 0.01 | NM_026437.1 |  |
| Vps24            | 640  | 0.92 | 0.17 | NM_025783.2 |  |
| Ift52            | 1164 | 0.92 | 0.07 |             |  |
| Aldoc            | 913  | 0.92 | 0.22 | XM_126120.5 |  |
| 9330160M08Rik    | 33   | 0.92 | 0.30 | AK079082    |  |
| Sox5             | 229  | 0.92 | 0.21 | AK081802    |  |
| Sars1            | 413  | 0.92 | 0.16 | NM_011319   |  |
| Mier1            | 661  | 0.92 | 0.13 |             |  |
| Scarb1           | 161  | 0.92 | 0.29 | NM_016741.1 |  |
| scl000788.1_77   | 37   | 0.92 | 0.15 |             |  |
| 1110061O04Rik    | 522  | 0.92 | 0.05 | NM_026849.1 |  |
| Asah1            | 1947 | 0.92 | 0.11 | NM_019734.1 |  |
| Ppp2r3c          | 284  | 0.92 | 0.05 |             |  |
| A630020I15Rik    | 33   | 0.92 | 0.19 | AK041549    |  |
| Arfp1            | 4600 | 0.92 | 0.23 | XM_130985.2 |  |
| Ddx46            | 799  | 0.92 | 0.16 | NM_145975.1 |  |
| Zfp50            | 882  | 0.92 | 0.19 | XM_127016.2 |  |
| A530046H20Rik    | 577  | 0.92 | 0.23 | NM_172310.1 |  |
| Neo1             | 421  | 0.92 | 0.04 | AK084609    |  |
| 2610206C24Rik    | 69   | 0.92 | 0.04 | AK011898    |  |
| BC035954         | 1183 | 0.92 | 0.11 | NM_177569.2 |  |
| 9030624J02Rik    | 699  | 0.92 | 0.11 | NM_027815.1 |  |
| scl0002770.1_125 | 85   | 0.92 | 0.09 |             |  |
| Pms2             | 486  | 0.92 | 0.05 | NM_008886.1 |  |
| BC023741         | 475  | 0.92 | 0.06 | XM_148582.3 |  |
| LOC380836        | 256  | 0.92 | 0.08 | XM_354744.1 |  |
| 2410018M08Rik    | 304  | 0.92 | 0.16 | NM_183088.1 |  |
| Cul2             | 223  | 0.92 | 0.30 | NM_029402.1 |  |
| Rad50            | 364  | 0.92 | 0.12 | NM_009012.1 |  |
| Mdm4             | 70   | 0.92 | 0.23 | AK049576    |  |
| LOC381743        | 313  | 0.92 | 0.07 | XM_355728.1 |  |
| Tram1            | 8008 | 0.92 | 0.12 | NM_028173.1 |  |
| Zcchc6           | 1675 | 0.92 | 0.14 | NM_153538.1 |  |
| Tmem20           | 3837 | 0.92 | 0.11 | NM_175507.2 |  |
| Ncoa6            | 534  | 0.92 | 0.16 | NM_019825.1 |  |
| 9030612M13Rik    | 144  | 0.92 | 0.16 | NM_172458.2 |  |
| 9930033H14Rik    | 764  | 0.92 | 0.14 | XM_126551.4 |  |
| 2610528B01Rik    | 475  | 0.92 | 0.11 |             |  |
| 2210407C18Rik    | 982  | 0.92 | 0.27 | NM_144544.1 |  |
| BC018601         | 373  | 0.92 | 0.25 | NM_134033.1 |  |
| Apbb2            | 323  | 0.92 | 0.01 | NM_009686.1 |  |
| Dm15             | 2150 | 0.92 | 0.16 | NM_032418.1 |  |
| DXImx50e         | 1320 | 0.92 | 0.04 | NM_207202.1 |  |
| LOC380764        | 101  | 0.92 | 0.02 | XM_354676.1 |  |
| 1700020O03Rik    | 42   | 0.92 | 0.11 | NM_027405.2 |  |
| 1700012H17Rik    | 537  | 0.92 | 0.23 | NM_173426   |  |
| Zym2             | 996  | 0.92 | 0.29 |             |  |



|                  |      |      |      |             |  |
|------------------|------|------|------|-------------|--|
| Kpnb1            | 2752 | 0.92 | 0.17 | NM_008379.2 |  |
| Al847670         | 1590 | 0.92 | 0.05 | NM_177869.2 |  |
| C330029B10Rik    | 525  | 0.92 | 0.17 | NM_183033   |  |
| Ttid             | 707  | 0.92 | 0.07 | NM_021484.2 |  |
| scl0001708.1_442 | 451  | 0.92 | 0.16 |             |  |
| Oxct1            | 2925 | 0.92 | 0.11 | NM_024188.3 |  |
| Arfl4            | 40   | 0.92 | 0.44 | NM_025404.1 |  |
| Lrmp             | 36   | 0.92 | 0.48 | NM_008511   |  |
| E230015L20Rik    | 180  | 0.92 | 0.32 | NM_177111.1 |  |
| Vegfa            | 2494 | 0.92 | 0.16 | NM_009505.2 |  |
| Zcwpw1           | 315  | 0.92 | 0.11 |             |  |
| Ide              | 968  | 0.92 | 0.11 | NM_031156.1 |  |
| 5830417C01Rik    | 308  | 0.92 | 0.19 | NM_024282.2 |  |
| C130022E19Rik    | 117  | 0.92 | 0.12 | AK047931    |  |
| Dlat             | 161  | 0.92 | 0.26 | NM_145614.2 |  |
| Lonrf1           | 127  | 0.92 | 0.18 |             |  |
| Pik4cb           | 380  | 0.92 | 0.08 | NM_175356.1 |  |
| Lrch4            | 71   | 0.92 | 0.20 | NM_146164.1 |  |
| 6430590A07Rik    | 33   | 0.92 | 0.48 | AK078307    |  |
| 5430425C04Rik    | 700  | 0.92 | 0.21 | NM_178381.2 |  |
| Csde1            | 1540 | 0.92 | 0.19 |             |  |
| 2610042L04Rik    | 81   | 0.92 | 0.17 | NM_025940.3 |  |
| Sh2bp1           | 366  | 0.92 | 0.10 | NM_009431.1 |  |
| BC025546         | 2005 | 0.92 | 0.19 | NM_146215.2 |  |
| 1700016A15Rik    | 3042 | 0.92 | 0.02 | XM_127067.4 |  |
| Pcnx             | 447  | 0.92 | 0.21 | NM_018814.1 |  |
| Sec8l1           | 1125 | 0.92 | 0.14 | NM_009148.1 |  |
| 6430403C09Rik    | 33   | 0.92 | 0.13 | AK032153    |  |
| 9430077D24Rik    | 354  | 0.92 | 0.10 | AK020492    |  |
| A230102O09Rik    | 1884 | 0.92 | 0.04 |             |  |
| Capn1            | 66   | 0.92 | 0.54 | NM_007600.2 |  |
| Pes1             | 1443 | 0.92 | 0.03 | NM_022889.2 |  |
| Nek4             | 141  | 0.92 | 0.16 | NM_011849.1 |  |
| LOC384200        | 33   | 0.92 | 0.06 | XM_357483.1 |  |
| D5Wsu178e        | 1341 | 0.92 | 0.08 | NM_027652.1 |  |
| Ss18l1           | 103  | 0.92 | 0.24 | NM_178750.4 |  |
| scl0003332.1_66  | 210  | 0.92 | 0.28 |             |  |
| LOC329706        | 120  | 0.92 | 0.06 | XM_203164.3 |  |
| D8Erttd457e      | 208  | 0.92 | 0.22 | NM_181854.1 |  |
| 2810422M04Rik    | 110  | 0.92 | 0.59 | NM_025640   |  |
| Bbs4             | 565  | 0.92 | 0.13 | NM_175325.2 |  |
| Elmo3            | 220  | 0.92 | 0.10 | NM_172760.1 |  |
| Fosl2            | 540  | 0.92 | 0.20 | NM_008037.3 |  |
| Satb1            | 421  | 0.92 | 0.08 | AK040502    |  |
| 2010009J12Rik    | 551  | 0.92 | 0.08 | AK008164    |  |
| LOC386078        | 1566 | 0.92 | 0.07 | XM_359058.1 |  |
| 1700001A24Rik    | 6097 | 0.92 | 0.09 | NM_175395.2 |  |
| Pmpca            | 40   | 0.92 | 0.35 | NM_173180.2 |  |
| B430201F14       | 67   | 0.92 | 0.20 |             |  |
| C130078A06Rik    | 134  | 0.92 | 0.17 | AK081792    |  |
| Gpr45            | 44   | 0.92 | 0.35 | NM_053107.2 |  |
| Rnf170           | 317  | 0.92 | 0.04 |             |  |
| R3hdm1           | 4573 | 0.92 | 0.11 |             |  |
| Ppp3cb           | 2597 | 0.92 | 0.25 | NM_008914   |  |
| Smc5l1           | 936  | 0.92 | 0.22 | NM_153808.1 |  |
| E330036C13Rik    | 108  | 0.92 | 0.33 | AK054519    |  |
| Elf3             | 1100 | 0.92 | 0.23 | NM_007921.1 |  |
| BC030867         | 101  | 0.92 | 0.30 | NM_153544.2 |  |
| 4921514E18Rik    | 2071 | 0.92 | 0.15 | AK029530    |  |
| Vps33a           | 1090 | 0.92 | 0.10 | NM_029929.2 |  |
| 2900024O10Rik    | 101  | 0.92 | 0.13 | AK013594    |  |
| Rpp14            | 1598 | 0.92 | 0.11 | NM_025938.1 |  |
| sty              | 3516 | 0.92 | 0.13 | U21209      |  |
| BC023882         | 96   | 0.92 | 0.11 | NM_146159.1 |  |
| Tebp             | 1630 | 0.92 | 0.17 | NM_019766.2 |  |
| Zfp513           | 94   | 0.92 | 0.24 | NM_175311.3 |  |
| Tceb1            | 2193 | 0.92 | 0.31 | NM_026456.2 |  |
| Tilz3c           | 171  | 0.92 | 0.21 | AF201289    |  |

|               |       |      |      |             |  |
|---------------|-------|------|------|-------------|--|
| Polh          | 433   | 0.92 | 0.10 | NM_030715.2 |  |
| Adipor1       | 4110  | 0.92 | 0.18 | NM_028320.2 |  |
| Tsg101        | 554   | 0.92 | 0.27 | NM_021884.1 |  |
| D030041I09Rik | 39    | 0.92 | 0.15 | NM_175460.2 |  |
| E430027O22Rik | 2242  | 0.92 | 0.24 | XM_129248.4 |  |
| Cdcp1         | 270   | 0.92 | 0.10 |             |  |
| D430043P15Rik | 168   | 0.92 | 0.24 | AK085149    |  |
| Pip5k2a       | 2142  | 0.92 | 0.22 | NM_008845.2 |  |
| Usp10         | 296   | 0.92 | 0.05 | NM_009462.1 |  |
| Prpsap2       | 183   | 0.92 | 0.17 | NM_144806.1 |  |
| Myef2         | 995   | 0.92 | 0.07 | NM_010852.1 |  |
| 2610024B07Rik | 1481  | 0.92 | 0.06 |             |  |
| LOC245670     | 871   | 0.92 | 0.18 | XM_142239.2 |  |
| Brd8          | 158   | 0.92 | 0.33 | NM_144864.1 |  |
| Kif5a         | 117   | 0.92 | 0.16 | NM_008447.2 |  |
| Hhat          | 38    | 0.92 | 0.18 |             |  |
| AW490415      | 289   | 0.92 | 0.23 |             |  |
| D430019N05Rik | 45    | 0.92 | 0.37 | AK084962    |  |
| Ptch1         | 238   | 0.92 | 0.12 | NM_008957.1 |  |
| Slc19a2       | 1692  | 0.92 | 0.30 | NM_054087.1 |  |
| 2210037E17Rik | 126   | 0.92 | 0.29 |             |  |
| Ubg           | 24130 | 0.92 | 0.10 |             |  |
| Mmp14         | 41    | 0.92 | 0.31 | AK040968    |  |
| D530006B18Rik | 121   | 0.92 | 0.04 | XM_133180.3 |  |
| B230380D07Rik | 1284  | 0.92 | 0.30 | NM_172772.1 |  |
| A530030G15Rik | 477   | 0.92 | 0.31 | AK079972    |  |
| AW112037      | 1702  | 0.92 | 0.09 |             |  |
| Pde4d         | 107   | 0.92 | 0.09 | NM_011056.1 |  |
| Phr1          | 638   | 0.92 | 0.17 | NM_207215   |  |
| F830002E14Rik | 1359  | 0.92 | 0.34 | AK089567    |  |
| LOC574405     | 33    | 0.92 | 0.06 |             |  |
| Zfp260        | 1430  | 0.92 | 0.21 | NM_011981   |  |
| Zfp85-rs1     | 63    | 0.92 | 0.08 |             |  |
| Ccnt2         | 460   | 0.92 | 0.14 | AK013634    |  |
| 2700091N06Rik | 444   | 0.92 | 0.11 | NM_026028.1 |  |
| Zrf2          | 2760  | 0.92 | 0.09 | NM_009584   |  |
| Mcrs1         | 233   | 0.92 | 0.10 | NM_016766.2 |  |
| 2810004N23Rik | 99    | 0.92 | 0.18 |             |  |
| Zfp275        | 1269  | 0.92 | 0.25 | NM_031494.1 |  |
| Jph3          | 189   | 0.92 | 0.06 | NM_020605.1 |  |
| Elmo2         | 116   | 0.92 | 0.23 | NM_207705.1 |  |
| Srrm1         | 55    | 0.92 | 0.29 | NM_016799.1 |  |
| BC021513      | 49    | 0.92 | 0.56 | NM_144894.2 |  |
| Fchsd2        | 624   | 0.92 | 0.20 | NM_199012.1 |  |
| Wdr20a        | 516   | 0.92 | 0.14 |             |  |
| Sfrs2ip       | 1511  | 0.92 | 0.03 | XM_128178.5 |  |
| Kik10         | 53    | 0.92 | 0.15 | NM_133712.1 |  |
| 3230401M21Rik | 335   | 0.92 | 0.27 | XM_128557.2 |  |
| 5430434G16Rik | 349   | 0.92 | 0.09 |             |  |
| Matr3         | 7378  | 0.92 | 0.26 | NM_010771.3 |  |
| Zfp2          | 184   | 0.92 | 0.28 | NM_009550   |  |
| D430029G22Rik | 64    | 0.92 | 0.20 | AK052461    |  |
| Rab3ip        | 417   | 0.92 | 0.04 | XM_125875.5 |  |
| Hrb           | 3696  | 0.92 | 0.22 | NM_010472   |  |
| Gyg1          | 399   | 0.92 | 0.06 | NM_013755.1 |  |
| 1300007C21Rik | 283   | 0.92 | 0.28 | NM_175119.1 |  |
| Neurod1       | 353   | 0.92 | 0.10 | NM_010894.1 |  |
| Exo1          | 51    | 0.92 | 0.28 | NM_012012.2 |  |
| LOC271505     | 1318  | 0.92 | 0.17 | XM_195066.3 |  |
| BC031748      | 233   | 0.92 | 0.16 | NM_146261.1 |  |
| Susd2         | 35    | 0.92 | 0.15 | NM_027890.3 |  |
| 6330409N04Rik | 181   | 0.92 | 0.13 | NM_025697.1 |  |
| Neurog1       | 45    | 0.92 | 0.18 | NM_010896.1 |  |
| Ddx5          | 708   | 0.92 | 0.22 | NM_007840.1 |  |
| Osbpl10       | 264   | 0.92 | 0.25 | NM_148958.1 |  |
| 6330412F12Rik | 1639  | 0.92 | 0.19 | NM_016736.1 |  |
| BC062951      | 170   | 0.92 | 0.32 | NM_199032.1 |  |
| 6430562A12Rik | 180   | 0.92 | 0.15 | AK032481    |  |

|                  |      |      |      |             |  |
|------------------|------|------|------|-------------|--|
| Rnasen           | 1401 | 0.92 | 0.13 |             |  |
| Taar3            | 52   | 0.92 | 0.27 |             |  |
| Bzw1             | 4332 | 0.92 | 0.14 | NM_025824   |  |
| Bbs2             | 327  | 0.92 | 0.15 | NM_026116.2 |  |
| Zfp446           | 204  | 0.92 | 0.12 |             |  |
| Snph             | 84   | 0.92 | 0.24 | NM_198214.1 |  |
| 4632413C10Rik    | 491  | 0.92 | 0.13 | AK028513    |  |
| Rnf4             | 3883 | 0.92 | 0.12 | NM_011278.1 |  |
| Kif1a            | 373  | 0.92 | 0.06 | NM_008440.1 |  |
| 2210409M21Rik    | 351  | 0.92 | 0.10 | NM_133728.2 |  |
| Pcnt2            | 221  | 0.92 | 0.16 | NM_008787.2 |  |
| AU016693         | 450  | 0.92 | 0.23 | NM_178686.2 |  |
| Zyg11b           | 124  | 0.92 | 0.40 |             |  |
| C130065N10Rik    | 1691 | 0.92 | 0.17 |             |  |
| Grit             | 876  | 0.92 | 0.18 | NM_177379.2 |  |
| 6030490K01Rik    | 86   | 0.92 | 0.33 | AK031688    |  |
| Zfp248           | 111  | 0.92 | 0.07 | XM_132810.4 |  |
| Prkca            | 66   | 0.92 | 0.17 | NM_011101.1 |  |
| LOC383893        | 32   | 0.92 | 0.26 | XM_357313.1 |  |
| Sh3yl1           | 375  | 0.91 | 0.14 | NM_013709.2 |  |
| Fbxl4            | 379  | 0.91 | 0.10 | NM_172988   |  |
| 2310038K02Rik    | 88   | 0.91 | 0.20 | NM_146186.2 |  |
| D13Bwg1146e      | 46   | 0.91 | 0.34 | NM_029879   |  |
| Smek1            | 938  | 0.91 | 0.15 |             |  |
| Dhx15            | 6213 | 0.91 | 0.10 | NM_007839.1 |  |
| D6Wsu163e        | 609  | 0.91 | 0.05 | NM_138594.2 |  |
| A630097D09Rik    | 739  | 0.91 | 0.15 | AK042500    |  |
| Zfp397           | 644  | 0.91 | 0.03 | NM_027007   |  |
| Pcdha11          | 364  | 0.91 | 0.15 | NM_009960   |  |
| G3bp2            | 8484 | 0.91 | 0.05 |             |  |
| 2810021B07Rik    | 227  | 0.91 | 0.10 | NM_025479.2 |  |
| Atp2b2           | 74   | 0.91 | 0.16 | NM_009723.1 |  |
| AW228700         | 662  | 0.91 | 0.17 |             |  |
| 2700059D21Rik    | 932  | 0.91 | 0.03 | XM_358352.1 |  |
| Bub1b            | 1244 | 0.91 | 0.08 | NM_009773   |  |
| Hist1h1b         | 87   | 0.91 | 0.18 | NM_020034.1 |  |
| 4930488B01Rik    | 1157 | 0.91 | 0.05 |             |  |
| AW550801         | 374  | 0.91 | 0.21 | NM_177325   |  |
| LOC385632        | 356  | 0.91 | 0.18 | XM_358812.1 |  |
| Defb17           | 37   | 0.91 | 0.13 |             |  |
| Metap1           | 1568 | 0.91 | 0.08 | NM_175224.2 |  |
| LOC380626        | 243  | 0.91 | 0.25 | XM_134575.5 |  |
| Ube3c            | 2186 | 0.91 | 0.27 | NM_133907.1 |  |
| Hrpt2            | 556  | 0.91 | 0.22 | NM_145991   |  |
| B430214A04Rik    | 655  | 0.91 | 0.21 | NM_146018.1 |  |
| 1700025J14Rik    | 123  | 0.91 | 0.22 | NM_026450.2 |  |
| Rhof             | 118  | 0.91 | 0.14 | NM_175092.2 |  |
| Trim59           | 303  | 0.91 | 0.30 | NM_025863.2 |  |
| 2010319A12Rik    | 588  | 0.91 | 0.09 | AK008582    |  |
| 6820402O20Rik    | 498  | 0.91 | 0.08 | XM_133187   |  |
| 1500003O03Rik    | 1767 | 0.91 | 0.29 | NM_019769   |  |
| Ccm2             | 210  | 0.91 | 0.09 | NM_146014.1 |  |
| Insm1            | 6472 | 0.91 | 0.18 | NM_016889.1 |  |
| 5430438H03Rik    | 39   | 0.91 | 0.16 | NM_176951.2 |  |
| Eif3s10          | 731  | 0.91 | 0.17 | NM_010123.2 |  |
| Pcyt2            | 694  | 0.91 | 0.09 | NM_024229.2 |  |
| Stk2             | 537  | 0.91 | 0.20 | NM_009289.1 |  |
| Hivep1           | 68   | 0.91 | 0.20 | NM_007772.1 |  |
| 4931408L03Rik    | 109  | 0.91 | 0.47 | NM_030074.1 |  |
| Bicd1            | 86   | 0.91 | 0.22 | NM_009753   |  |
| Myst2            | 1068 | 0.91 | 0.09 | NM_177619.2 |  |
| Pogz             | 57   | 0.91 | 0.06 | NM_172683.1 |  |
| AW413632         | 637  | 0.91 | 0.21 | NM_177588.1 |  |
| Ralbp1           | 3103 | 0.91 | 0.16 | NM_009067.1 |  |
| Kcnv2            | 97   | 0.91 | 0.32 | NM_183179.1 |  |
| D8Ert82e         | 76   | 0.91 | 0.31 | NM_172911.1 |  |
| Fgf12            | 109  | 0.91 | 0.17 | NM_183064.1 |  |
| scl0001602.1_506 | 41   | 0.91 | 0.22 |             |  |

|               |       |      |      |              |  |
|---------------|-------|------|------|--------------|--|
| LOC385192     | 39    | 0.91 | 0.25 | XM_358110.1  |  |
| 2010106G01Rik | 225   | 0.91 | 0.27 | NM_023220.1  |  |
| Cdc2l5        | 342   | 0.91 | 0.08 | XM_127221    |  |
| Arnt          | 302   | 0.91 | 0.15 | NM_009709    |  |
| 2810449M09Rik | 41    | 0.91 | 0.17 |              |  |
| Cri1          | 131   | 0.91 | 0.37 | NM_025613.1  |  |
| A930039H18Rik | 49    | 0.91 | 0.10 | AK044751     |  |
| AW060207      | 480   | 0.91 | 0.08 | NM_144911.1  |  |
| LOC236311     | 51    | 0.91 | 0.13 | XM_135607.2  |  |
| Frs2          | 297   | 0.91 | 0.07 | NM_177798    |  |
| B930044G13Rik | 116   | 0.91 | 0.05 | AK047270     |  |
| Tenc1         | 36    | 0.91 | 0.17 | BC042190     |  |
| C030044K08Rik | 83    | 0.91 | 0.17 | AK047795     |  |
| D630045E04Rik | 2168  | 0.91 | 0.03 | NM_153521.1  |  |
| Lifr          | 60    | 0.91 | 0.23 | NM_013584.1  |  |
| lft88         | 586   | 0.91 | 0.06 |              |  |
| Rgma          | 159   | 0.91 | 0.07 | NM_177740.2  |  |
| 6720463L11Rik | 1697  | 0.91 | 0.12 | AK032861     |  |
| Fin15         | 108   | 0.91 | 0.35 | NM_008016    |  |
| 4833439L19Rik | 789   | 0.91 | 0.14 | NM_133797    |  |
| Dnajc14       | 102   | 0.91 | 0.10 | NM_028873.2  |  |
| Kdt1          | 511   | 0.91 | 0.29 | NM_175088.2  |  |
| LOC224576     | 33    | 0.91 | 0.27 | XM_139792.3  |  |
| LOC380689     | 43    | 0.91 | 0.15 | XM_358405.1  |  |
| 2410007P03Rik | 58    | 0.91 | 0.45 | NM_025475.1  |  |
| C330017I15Rik | 394   | 0.91 | 0.13 | NM_178403.2  |  |
| 4430402I18Rik | 34    | 0.91 | 0.26 | NM_198651.1  |  |
| Cnot2         | 1435  | 0.91 | 0.14 | BC063105     |  |
| Hvcn1         | 174   | 0.91 | 0.07 |              |  |
| Dio1          | 163   | 0.91 | 0.14 | NM_007860    |  |
| Tmem88        | 46    | 0.91 | 0.08 |              |  |
| D930007M19Rik | 41    | 0.91 | 0.20 | AK086138     |  |
| LOC225518     | 1220  | 0.91 | 0.09 | XM_128908.3  |  |
| Pnma1         | 388   | 0.91 | 0.30 | XM_127024    |  |
| Als2cr2       | 459   | 0.91 | 0.04 | NM_172656    |  |
| Nkx2-2        | 271   | 0.91 | 0.56 | NM_010919.1  |  |
| mKIAA1429     | 36    | 0.91 | 0.62 | AK122509     |  |
| Hdac2         | 6802  | 0.91 | 0.09 | AK051753     |  |
| Tacr1         | 54    | 0.91 | 0.18 | NM_009313.2  |  |
| Farp1         | 829   | 0.91 | 0.10 | XM_127877.4  |  |
| E330016A19Rik | 47    | 0.91 | 0.15 | NM_173386.1  |  |
| Tmpo          | 1063  | 0.91 | 0.21 | NM_011605    |  |
| Acbd3         | 3589  | 0.91 | 0.08 | NM_133225.1  |  |
| LOC383946     | 131   | 0.91 | 0.42 | XM_357341.1  |  |
| Slc37a4       | 87    | 0.91 | 0.35 | NM_008063.1  |  |
| Foxg1         | 200   | 0.91 | 0.46 | AK042354     |  |
| LOC242516     | 87    | 0.91 | 0.17 | XM_143811.3  |  |
| 2010312A17Rik | 88    | 0.91 | 0.14 | AK008565     |  |
| Pex3          | 313   | 0.91 | 0.12 | AK083778     |  |
| Mbnl1         | 2178  | 0.91 | 0.05 | NM_020007.2  |  |
| D12Erd748e    | 376   | 0.91 | 0.11 | NM_144833.1  |  |
| Fbxl11        | 1309  | 0.91 | 0.39 | NM_001001984 |  |
| Fut8          | 282   | 0.91 | 0.05 | AK078788     |  |
| LOC386135     | 35699 | 0.91 | 0.13 | XM_359086.1  |  |
| Mb            | 110   | 0.91 | 0.20 | NM_013593.2  |  |
| Papd1         | 966   | 0.91 | 0.17 | NM_026157.1  |  |
| Ube2n         | 640   | 0.91 | 0.06 | NM_080560.2  |  |
| Ikzf5         | 315   | 0.91 | 0.17 |              |  |
| A930013K19    | 41    | 0.91 | 0.49 | NM_172708.1  |  |
| BC024969      | 820   | 0.91 | 0.09 | XM_140497    |  |
| Sema3f        | 1635  | 0.91 | 0.20 | NM_011349.2  |  |
| Tnfrsf21      | 1343  | 0.91 | 0.14 | NM_178589    |  |
| 6430540M20Rik | 736   | 0.91 | 0.25 | AK032418     |  |
| 1200003I07Rik | 289   | 0.91 | 0.21 | NM_181274.2  |  |
| Edd1          | 3704  | 0.91 | 0.04 |              |  |
| AW540478      | 318   | 0.91 | 0.04 | XM_194070.2  |  |
| Tg737Rpw      | 306   | 0.91 | 0.16 | NM_009376    |  |
| Gnao          | 259   | 0.91 | 0.20 | NM_010308.2  |  |

|               |      |      |      |             |  |
|---------------|------|------|------|-------------|--|
| Rgl1          | 153  | 0.91 | 0.26 | NM_016846.2 |  |
| Snapc2        | 48   | 0.91 | 0.29 | NM_133968.1 |  |
| B630009I04Rik | 1474 | 0.91 | 0.16 | XM_125617.3 |  |
| LOC211556     | 276  | 0.91 | 0.10 | XM_131196.1 |  |
| Adamts4       | 87   | 0.91 | 0.24 | NM_172845.1 |  |
| 9030025P20Rik | 192  | 0.91 | 0.06 |             |  |
| Lbr           | 1472 | 0.91 | 0.31 | NM_133815.1 |  |
| Gmpr          | 329  | 0.91 | 0.22 | NM_025508.1 |  |
| BC066140      | 214  | 0.91 | 0.09 | XM_485999   |  |
| C630002C17Rik | 109  | 0.91 | 0.07 | AK049826    |  |
| Sec24b        | 667  | 0.91 | 0.14 | XM_131192.5 |  |
| B230354O11Rik | 109  | 0.91 | 0.30 | AK046228    |  |
| A530032J19Rik | 33   | 0.91 | 0.60 | AK079976    |  |
| Bicc1         | 71   | 0.91 | 0.15 | AK047271    |  |
| 5430401O09Rik | 93   | 0.91 | 0.20 | NM_176923   |  |
| 4732469G06Rik | 261  | 0.91 | 0.05 | AK028911    |  |
| LOC385275     | 74   | 0.91 | 0.19 | XM_358164.1 |  |
| Nanos2        | 40   | 0.91 | 0.16 | NM_194064.1 |  |
| B830015C02Rik | 268  | 0.91 | 0.12 | AK046820    |  |
| LOC236294     | 97   | 0.91 | 0.16 | XM_135596.4 |  |
| Slc29a3       | 438  | 0.91 | 0.02 | NM_023596.2 |  |
| Usp1          | 871  | 0.91 | 0.15 | NM_146144.2 |  |
| Ndr3          | 71   | 0.91 | 0.18 | AK029378    |  |
| 2410129H14Rik | 311  | 0.91 | 0.10 | NM_175245.2 |  |
| LOC224054     | 42   | 0.91 | 0.34 | XM_155898.3 |  |
| 9530081N05Rik | 1730 | 0.91 | 0.26 | AK035655    |  |
| 4933427D14Rik | 120  | 0.91 | 0.22 | NM_028963.1 |  |
| Elov14        | 1084 | 0.91 | 0.02 | NM_148941.1 |  |
| Cdca2         | 1212 | 0.91 | 0.09 | NM_175384.3 |  |
| Arfgef2       | 497  | 0.91 | 0.15 | XM_130646   |  |
| Gpr155        | 206  | 0.91 | 0.06 | XM_130346   |  |
| Sacm1l        | 1939 | 0.91 | 0.32 | NM_030692   |  |
| LOC234915     | 73   | 0.91 | 0.47 | XM_134630.2 |  |
| 9630025B04Rik | 1551 | 0.91 | 0.24 |             |  |
| LOC212390     | 329  | 0.91 | 0.07 | XM_131360.3 |  |
| Nusap1        | 1049 | 0.91 | 0.22 | NM_133851.1 |  |
| Ankrd27       | 118  | 0.91 | 0.15 | NM_178263.1 |  |
| 1110059F07Rik | 1533 | 0.91 | 0.12 | NM_172649   |  |
| C530027B15Rik | 78   | 0.91 | 0.18 | AK082974    |  |
| Mvd           | 496  | 0.91 | 0.16 | NM_138656.1 |  |
| Abce1         | 134  | 0.91 | 0.05 | NM_015751.1 |  |
| Cdon          | 83   | 0.91 | 0.27 | AK040711    |  |
| Emp2          | 76   | 0.91 | 0.15 | NM_007929.1 |  |
| 2310045L10Rik | 590  | 0.91 | 0.24 | AK009826    |  |
| Taf3          | 187  | 0.91 | 0.14 | XM_129997.5 |  |
| Atcay         | 50   | 0.91 | 0.22 | NM_178662.2 |  |
| Lamp2         | 1392 | 0.91 | 0.14 | NM_010685.2 |  |
| Lrp12         | 1616 | 0.91 | 0.19 | NM_172814.1 |  |
| 4832404P21Rik | 77   | 0.91 | 0.18 | AK029263    |  |
| Prkaa2        | 301  | 0.91 | 0.24 | XM_131633.3 |  |
| D230040N21Rik | 30   | 0.91 | 0.68 |             |  |
| C030011O14Rik | 306  | 0.91 | 0.22 | NM_174868   |  |
| Parp6         | 1722 | 0.91 | 0.21 | XM_134863.3 |  |
| Dnajc2        | 293  | 0.91 | 0.14 | NM_009583   |  |
| Zmynd12       | 53   | 0.91 | 0.14 |             |  |
| 9130023D20Rik | 355  | 0.91 | 0.10 | NM_178746.3 |  |
| Syng1         | 41   | 0.91 | 0.12 | NM_207708.1 |  |
| Fert2         | 253  | 0.91 | 0.10 | NM_008000.1 |  |
| Gnaq          | 275  | 0.91 | 0.08 | NM_008139   |  |
| Rev1          | 622  | 0.91 | 0.23 |             |  |
| 2410005G18Rik | 40   | 0.91 | 0.43 | AK044329    |  |
| C130085D15Rik | 715  | 0.91 | 0.12 | AK081890    |  |
| 5330440M15Rik | 304  | 0.91 | 0.34 | NM_029868.2 |  |
| Gls           | 258  | 0.91 | 0.22 | XM_129846.4 |  |
| C730004N19Rik | 31   | 0.91 | 0.21 | AK050030    |  |
| Zkscan2       | 36   | 0.91 | 0.09 |             |  |
| Fundc1        | 869  | 0.91 | 0.11 |             |  |
| Wrn           | 519  | 0.91 | 0.29 | NM_011721.2 |  |

|                  |       |      |      |              |  |
|------------------|-------|------|------|--------------|--|
| A930006A19Rik    | 136   | 0.91 | 0.13 | AK044293     |  |
| Snx4             | 830   | 0.91 | 0.18 | NM_080557    |  |
| 2610020O08Rik    | 997   | 0.91 | 0.17 | NM_025937    |  |
| 8430408H12Rik    | 2075  | 0.91 | 0.04 | NM_026236.1  |  |
| BC026996         | 59    | 0.91 | 0.14 | NM_201407.1  |  |
| 5730408I21Rik    | 139   | 0.91 | 0.06 | XM_127397.4  |  |
| A430096A09Rik    | 111   | 0.90 | 0.10 | AK079868     |  |
| Itn1             | 663   | 0.90 | 0.30 | NM_008408.2  |  |
| Trip12           | 2626  | 0.90 | 0.09 | NM_133975.2  |  |
| Vps4b            | 278   | 0.90 | 0.16 | NM_009190    |  |
| D10Bwg1379e      | 503   | 0.90 | 0.20 | XM_125524    |  |
| A730043L23Rik    | 149   | 0.90 | 0.20 | AK042960     |  |
| 1110014O20Rik    | 2630  | 0.90 | 0.03 |              |  |
| Ltbp3            | 723   | 0.90 | 0.07 | AK038587     |  |
| scl0000117.1_15_ | 172   | 0.90 | 0.10 |              |  |
| Mccc1            | 164   | 0.90 | 0.09 | NM_023644.2  |  |
| Pigk             | 61    | 0.90 | 0.16 | NM_025662.3  |  |
| Golgb1           | 1464  | 0.90 | 0.04 | XM_148244.4  |  |
| Hs6st3           | 47    | 0.90 | 0.40 | NM_015820.1  |  |
| Pcdhac2          | 143   | 0.90 | 0.18 | NM_001003672 |  |
| Crebbp           | 251   | 0.90 | 0.09 | XM_489496    |  |
| Ubc              | 20366 | 0.90 | 0.19 | NM_019639.2  |  |
| 1810007I17Rik    | 2183  | 0.90 | 0.18 |              |  |
| LOC231630        | 92    | 0.90 | 0.23 | XM_149654.3  |  |
| Pxk              | 216   | 0.90 | 0.03 |              |  |
| Bub3             | 288   | 0.90 | 0.07 | AK039977     |  |
| Hnrpd1           | 1447  | 0.90 | 0.06 | NM_016690.2  |  |
| Plaa             | 1352  | 0.90 | 0.06 | AK081641     |  |
| Gabra4           | 49    | 0.90 | 0.35 | NM_010251.1  |  |
| Ssx2ip           | 826   | 0.90 | 0.13 | NM_138744.1  |  |
| Slc36a1          | 106   | 0.90 | 0.33 | NM_153139.3  |  |
| D130060L11Rik    | 91    | 0.90 | 0.31 | AK051623     |  |
| Mynn             | 193   | 0.90 | 0.22 | AK030898     |  |
| LOC382339        | 706   | 0.90 | 0.23 | XM_356457.1  |  |
| 5330401P04Rik    | 587   | 0.90 | 0.14 | NM_172654.1  |  |
| Fut10            | 80    | 0.90 | 0.12 | NM_134161.2  |  |
| Top3a            | 133   | 0.90 | 0.13 | NM_009410.1  |  |
| Kihl32           | 132   | 0.90 | 0.09 |              |  |
| 2810035J02Rik    | 64    | 0.90 | 0.21 | AK012859     |  |
| Cul1             | 1173  | 0.90 | 0.10 | NM_012042.3  |  |
| Pdcd7            | 770   | 0.90 | 0.11 | NM_016688.1  |  |
| Mmab             | 137   | 0.90 | 0.14 | NM_029956.2  |  |
| 2310014H19Rik    | 413   | 0.90 | 0.16 | NM_028839.2  |  |
| Bbs7             | 746   | 0.90 | 0.14 | NM_027810.1  |  |
| Zfp28            | 185   | 0.90 | 0.20 | NM_175247.1  |  |
| Zfp364           | 33    | 0.90 | 0.15 | NM_026406    |  |
| C630002C18Rik    | 435   | 0.90 | 0.34 | AK049827     |  |
| Eif3s3           | 70    | 0.90 | 0.10 | NM_080635.1  |  |
| Pou2f2           | 56    | 0.90 | 0.21 | NM_011138.1  |  |
| Mrrf             | 173   | 0.90 | 0.06 | NM_026422.1  |  |
| 2310043N13Rik    | 75    | 0.90 | 0.44 | NM_025534.1  |  |
| Zcchc7           | 778   | 0.90 | 0.07 | NM_138590.2  |  |
| Galnt1           | 1532  | 0.90 | 0.17 | NM_013814.2  |  |
| Fnbp4            | 104   | 0.90 | 0.28 | NM_018828.1  |  |
| Gcn111           | 450   | 0.90 | 0.10 | XM_358358.1  |  |
| Rbbp9            | 476   | 0.90 | 0.17 | NM_015754.1  |  |
| Gtf2ird1         | 342   | 0.90 | 0.03 | AK081801     |  |
| Dsn1             | 270   | 0.90 | 0.09 |              |  |
| LOC245069        | 37    | 0.90 | 0.13 | XM_159529.3  |  |
| Zhx1             | 523   | 0.90 | 0.24 | NM_009572.2  |  |
| C030009J22Rik    | 264   | 0.90 | 0.13 |              |  |
| Gtf3c3           | 1821  | 0.90 | 0.26 |              |  |
| 2310047O13Rik    | 53    | 0.90 | 0.27 | NM_024185.3  |  |
| LOC216963        | 119   | 0.90 | 0.28 | XM_126291.5  |  |
| 2810402A17Rik    | 146   | 0.90 | 0.04 | XM_489366    |  |
| Csnk1g3          | 3323  | 0.90 | 0.17 | NM_152809.1  |  |
| Lss              | 364   | 0.90 | 0.02 | NM_146006    |  |
| Slc7a8           | 36    | 0.90 | 0.22 | NM_016972.2  |  |

|               |       |      |      |             |  |
|---------------|-------|------|------|-------------|--|
| Mucdhl        | 684   | 0.90 | 0.16 | NM_028069.1 |  |
| Ssbp3         | 1068  | 0.90 | 0.31 | NM_198438.1 |  |
| 2900026H06Rik | 121   | 0.90 | 0.34 | NM_028392.1 |  |
| Ddx26         | 2097  | 0.90 | 0.19 | NM_008715   |  |
| Rapsn         | 48    | 0.90 | 0.22 | NM_009023.1 |  |
| A330089M16Rik | 54    | 0.90 | 0.05 | AK039696    |  |
| Nek9          | 1336  | 0.90 | 0.12 | NM_145138.1 |  |
| E230022H04Rik | 277   | 0.90 | 0.02 | NM_153515.2 |  |
| Gabpa         | 209   | 0.90 | 0.22 | NM_008065.2 |  |
| Nup155        | 180   | 0.90 | 0.18 | NM_133227   |  |
| Cpox          | 33    | 0.90 | 0.39 | NM_007757.1 |  |
| Chd9          | 215   | 0.90 | 0.34 | XM_284439   |  |
| 4930518I15Rik | 255   | 0.90 | 0.04 |             |  |
| Ncor1         | 1526  | 0.90 | 0.01 | AK013831    |  |
| 2900024C23Rik | 130   | 0.90 | 0.20 | NM_026062.2 |  |
| Yeats2        | 878   | 0.90 | 0.17 | XM_148273   |  |
| Homer1        | 177   | 0.90 | 0.29 | NM_011982.1 |  |
| Cln3          | 1024  | 0.90 | 0.17 | NM_007711.1 |  |
| Cstf2         | 2698  | 0.90 | 0.38 | NM_133196.3 |  |
| 1700093E07Rik | 629   | 0.90 | 0.21 | AK007048    |  |
| 4930534B04Rik | 93    | 0.90 | 0.16 | NM_181815.1 |  |
| Mftc          | 141   | 0.90 | 0.35 | NM_172402.1 |  |
| Rbm18         | 751   | 0.90 | 0.07 | NM_026434.2 |  |
| Edem1         | 108   | 0.90 | 0.29 | NM_138677.1 |  |
| Syt13         | 186   | 0.90 | 0.16 | NM_030725.2 |  |
| Rybp          | 1001  | 0.90 | 0.22 | XM_125333.1 |  |
| 4930550C14Rik | 128   | 0.90 | 0.10 | NM_029247.1 |  |
| 6030416D17Rik | 36    | 0.90 | 0.49 | AK031375    |  |
| 2010001H16Rik | 449   | 0.90 | 0.12 |             |  |
| Gpld1         | 203   | 0.90 | 0.06 | AK081107    |  |
| C530050O22Rik | 753   | 0.90 | 0.26 | NM_172871.1 |  |
| Al427515      | 466   | 0.90 | 0.09 | NM_173016.2 |  |
| Snx27         | 478   | 0.90 | 0.15 | XM_131051.4 |  |
| App           | 10705 | 0.90 | 0.08 | NM_007471   |  |
| 5830418G11Rik | 40    | 0.90 | 0.23 | AK017939    |  |
| LOC385959     | 133   | 0.90 | 0.14 | XM_359014.1 |  |
| Usp16         | 3150  | 0.90 | 0.18 | NM_024258.1 |  |
| 1700064K09Rik | 338   | 0.90 | 0.07 | NM_175244   |  |
| 9130022K13Rik | 450   | 0.90 | 0.10 | XM_203652.2 |  |
| LOC226652     | 507   | 0.90 | 0.11 | XM_129550.4 |  |
| 4930547N16Rik | 167   | 0.90 | 0.04 | AK016062    |  |
| Krt2-4        | 48    | 0.90 | 0.32 | NM_008475.1 |  |
| Al115600      | 1159  | 0.90 | 0.10 | XM_134902.4 |  |
| C130074G19Rik | 36    | 0.90 | 0.32 | NM_178692.2 |  |
| B230113H14Rik | 33    | 0.90 | 0.71 | AK020974    |  |
| Adnp          | 4887  | 0.90 | 0.03 | NM_009628.1 |  |
| Aof2          | 8499  | 0.90 | 0.05 | NM_133872.1 |  |
| Slc35e4       | 88    | 0.90 | 0.26 | NM_153142.2 |  |
| 1810044A24Rik | 89    | 0.90 | 0.19 |             |  |
| LOC381853     | 38    | 0.90 | 0.35 | XM_355865.1 |  |
| 2810407L07Rik | 313   | 0.90 | 0.12 | XM_289902.2 |  |
| Creb1         | 61    | 0.90 | 0.15 | NM_133828.1 |  |
| Tuba1a        | 15804 | 0.90 | 0.14 |             |  |
| 2810031B20Rik | 76    | 0.90 | 0.23 | AK012845    |  |
| Zcchc14       | 660   | 0.90 | 0.13 | NM_080855   |  |
| Lu            | 49    | 0.90 | 0.22 | NM_020486.1 |  |
| Suclg2        | 501   | 0.90 | 0.05 | XM_284754.2 |  |
| Tnrc11        | 599   | 0.90 | 0.25 | NM_021521   |  |
| Atp2a2        | 7248  | 0.90 | 0.08 | NM_009722.1 |  |
| D930049A15Rik | 36    | 0.90 | 0.58 |             |  |
| D830044I01Rik | 33    | 0.90 | 0.11 | AK052922    |  |
| Dnm2          | 201   | 0.90 | 0.04 | NM_007871   |  |
| Sec24d        | 222   | 0.90 | 0.13 | NM_027135.2 |  |
| Al450540      | 778   | 0.90 | 0.19 | NM_145505.2 |  |
| Ppfibp1       | 378   | 0.90 | 0.16 | NM_026221   |  |
| Ap1gbp1       | 413   | 0.90 | 0.09 | NM_194341.1 |  |
| Sestd1        | 448   | 0.90 | 0.11 | NM_175465   |  |
| LOC228094     | 110   | 0.90 | 0.12 | XM_149165.3 |  |

|                  |       |      |      |             |  |
|------------------|-------|------|------|-------------|--|
| Rrm2b            | 194   | 0.90 | 0.22 | NM_199476.1 |  |
| Cul4a            | 548   | 0.90 | 0.13 | NM_146207.1 |  |
| 8430407G10Rik    | 42    | 0.90 | 0.38 | AK078805    |  |
| scl0003078.1_29  | 173   | 0.90 | 0.25 |             |  |
| Kcna1            | 32    | 0.90 | 0.47 | NM_010610.1 |  |
| Ankrd28          | 270   | 0.90 | 0.16 | XM_127673   |  |
| Cnot7            | 875   | 0.90 | 0.25 | AK007767    |  |
| Tfdp1            | 4115  | 0.90 | 0.13 | NM_009361.1 |  |
| lqca             | 34    | 0.90 | 0.21 | NM_029122.1 |  |
| LOC384842        | 48    | 0.90 | 0.25 | XM_357896.1 |  |
| LOC380854        | 112   | 0.90 | 0.35 | XM_354759.1 |  |
| Xdh              | 37    | 0.90 | 0.55 | NM_011723   |  |
| Tbc1d2           | 94    | 0.90 | 0.04 | XM_283964   |  |
| Ln timer         | 365   | 0.90 | 0.03 | NM_080795.3 |  |
| Trak2            | 1209  | 0.90 | 0.10 |             |  |
| 9330151L19Rik    | 90    | 0.90 | 0.24 | AK034052    |  |
| Cpt1b            | 55    | 0.90 | 0.31 | NM_009948.1 |  |
| Erlin2           | 540   | 0.90 | 0.10 |             |  |
| E130115J16Rik    | 44    | 0.90 | 0.39 | NM_172809.1 |  |
| Cdk13            | 92    | 0.90 | 0.28 | NM_153785.1 |  |
| Wdr6             | 443   | 0.90 | 0.04 |             |  |
| B930007L02Rik    | 256   | 0.90 | 0.07 | XM_356186.1 |  |
| LOC381510        | 67    | 0.90 | 0.37 | XM_355469.1 |  |
| Defb4            | 35    | 0.90 | 0.65 | NM_019728.2 |  |
| Anln             | 1356  | 0.90 | 0.25 | NM_028390.1 |  |
| Dncic1           | 299   | 0.90 | 0.03 | NM_010063.1 |  |
| Tdrd3            | 300   | 0.90 | 0.05 | NM_172605.2 |  |
| Kbtbd7           | 192   | 0.90 | 0.20 |             |  |
| Nedd4            | 299   | 0.90 | 0.15 | NM_010890.2 |  |
| LOC209706        | 31    | 0.90 | 0.50 |             |  |
| D030020M24Rik    | 45    | 0.90 | 0.04 | AK050805    |  |
| Pte2b            | 71    | 0.90 | 0.06 | NM_134247.2 |  |
| Sgpl1            | 347   | 0.90 | 0.22 | NM_009163.2 |  |
| Slc30a5          | 1902  | 0.90 | 0.05 | NM_022885.1 |  |
| Ets1             | 91    | 0.90 | 0.10 | NM_011808.1 |  |
| D830006B12Rik    | 41    | 0.90 | 0.82 | AK085769    |  |
| Zfp97            | 44    | 0.90 | 0.32 | NM_011765.2 |  |
| Rab10            | 341   | 0.90 | 0.10 | NM_016676.2 |  |
| Gdd1             | 31    | 0.90 | 0.23 | NM_177694.2 |  |
| B230219D22Rik    | 1213  | 0.90 | 0.09 | NM_181278.2 |  |
| 4930430F08Rik    | 710   | 0.90 | 0.29 | NM_175128   |  |
| Abhd5            | 596   | 0.90 | 0.17 | NM_026179.1 |  |
| 4430402O11Rik    | 213   | 0.90 | 0.08 | NM_026272.2 |  |
| BC057371         | 825   | 0.90 | 0.24 | NM_177572.3 |  |
| Smpd13a          | 747   | 0.90 | 0.11 | NM_020561.1 |  |
| Crsp3            | 666   | 0.90 | 0.18 | XM_358301   |  |
| 1500040F11Rik    | 40    | 0.90 | 0.32 | NM_025352.1 |  |
| BC056485         | 185   | 0.90 | 0.15 | XM_484063   |  |
| LOC385940        | 17444 | 0.90 | 0.11 | XM_359007.1 |  |
| AI450948         | 129   | 0.90 | 0.27 |             |  |
| Glit28d1         | 88    | 0.90 | 0.15 | NM_026247   |  |
| 2310058A11Rik    | 272   | 0.90 | 0.27 | NM_133993.1 |  |
| E2f5             | 442   | 0.90 | 0.07 | NM_007892.2 |  |
| 1110004P21Rik    | 477   | 0.90 | 0.23 |             |  |
| LOC383800        | 63    | 0.90 | 0.23 | XM_357261.1 |  |
| Rab1             | 236   | 0.90 | 0.25 | NM_008996.2 |  |
| Nckip5d          | 75    | 0.90 | 0.23 | NM_030729.1 |  |
| BC004004         | 74    | 0.90 | 0.24 | NM_030561.2 |  |
| 1700058C13Rik    | 50    | 0.90 | 0.14 | XM_130597.1 |  |
| D030027P05Rik    | 108   | 0.90 | 0.19 | AK050870    |  |
| Kctd9            | 131   | 0.90 | 0.52 | NM_134073.1 |  |
| Tcfcp2l2         | 288   | 0.90 | 0.10 | NM_145890.1 |  |
| D030044A08Rik    | 57    | 0.90 | 0.36 | AK083553    |  |
| Btbd2            | 55    | 0.90 | 0.29 | XM_354550.1 |  |
| scl0002335.1_101 | 40    | 0.90 | 0.28 |             |  |
| Klhl12           | 160   | 0.90 | 0.18 | NM_153128.1 |  |
| Rai2             | 76    | 0.90 | 0.24 | NM_198409.1 |  |
| 1700011I03Rik    | 34    | 0.90 | 0.43 |             |  |



|               |      |      |      |             |  |
|---------------|------|------|------|-------------|--|
| Thrap5        | 649  | 0.90 | 0.23 | NM_198107.1 |  |
| Brunol4       | 247  | 0.90 | 0.12 | NM_133195.1 |  |
| Senp1         | 466  | 0.90 | 0.05 | NM_144851.2 |  |
| Efha1         | 622  | 0.90 | 0.06 |             |  |
| Wasf3         | 49   | 0.90 | 0.09 | NM_145155.1 |  |
| Pkn2          | 464  | 0.89 | 0.20 | NM_178654   |  |
| Srpr          | 971  | 0.89 | 0.16 | NM_026130.1 |  |
| Tom1          | 160  | 0.89 | 0.12 | NM_011622   |  |
| Dck           | 210  | 0.89 | 0.07 | NM_007832.3 |  |
| 4632407F12Rik | 57   | 0.89 | 0.29 | XM_110709.2 |  |
| Prdx6         | 36   | 0.89 | 0.20 | NM_007453.2 |  |
| Strn          | 76   | 0.89 | 0.28 | NM_011500   |  |
| B930097J01Rik | 43   | 0.89 | 0.24 | AK047604    |  |
| LOC217741     | 175  | 0.89 | 0.16 | XM_127111.3 |  |
| C030010B13Rik | 125  | 0.89 | 0.23 | XM_488973   |  |
| LOC272693     | 35   | 0.89 | 0.21 | XM_195425.1 |  |
| LOC331490     | 602  | 0.89 | 0.20 | XM_284729.2 |  |
| D130060C09Rik | 212  | 0.89 | 0.17 | NM_177054.3 |  |
| Spag9         | 340  | 0.89 | 0.20 | NM_027569.1 |  |
| 2610318G18Rik | 184  | 0.89 | 0.11 | NM_026013   |  |
| Hhex          | 49   | 0.89 | 0.48 | NM_008245.2 |  |
| D630025L11Rik | 154  | 0.89 | 0.11 | AK052697    |  |
| Mad5          | 163  | 0.89 | 0.30 | AK032570    |  |
| Dbf4          | 1433 | 0.89 | 0.03 |             |  |
| LOC277837     | 249  | 0.89 | 0.31 | XM_204184.2 |  |
| Cxcl14        | 88   | 0.89 | 0.39 | NM_019568   |  |
| 9130404D08Rik | 627  | 0.89 | 0.15 | NM_028993.2 |  |
| Gcap3         | 59   | 0.89 | 0.32 |             |  |
| Prpf8         | 1176 | 0.89 | 0.15 | NM_138659.1 |  |
| Zfp278        | 42   | 0.89 | 0.29 | BC055947    |  |
| Hivep3        | 78   | 0.89 | 0.12 | NM_010657.2 |  |
| 1300007B12Rik | 1923 | 0.89 | 0.07 | NM_020588.1 |  |
| Aps           | 83   | 0.89 | 0.15 | NM_018825.2 |  |
| Hlcs          | 1200 | 0.89 | 0.12 | NM_139145.2 |  |
| Zfp148        | 1429 | 0.89 | 0.24 | NM_011749   |  |
| Pfkfb2        | 141  | 0.89 | 0.23 | NM_008825.2 |  |
| Atp9a         | 765  | 0.89 | 0.02 | NM_015731.2 |  |
| D630016K15Rik | 95   | 0.89 | 0.31 | AK052662    |  |
| Mapk1         | 5063 | 0.89 | 0.05 | NM_011949.2 |  |
| Mod1          | 2706 | 0.89 | 0.17 | NM_008615   |  |
| AI848259      | 331  | 0.89 | 0.06 | AK045725    |  |
| Enc1          | 1097 | 0.89 | 0.17 | NM_007930.3 |  |
| Ccl11         | 37   | 0.89 | 0.26 | NM_011330.1 |  |
| 4833412L08Rik | 106  | 0.89 | 0.20 | NM_175376.2 |  |
| Vldlr         | 1296 | 0.89 | 0.07 | NM_013703   |  |
| Cbara1        | 411  | 0.89 | 0.16 | NM_144822.1 |  |
| C530015M04Rik | 1015 | 0.89 | 0.24 | AK082943    |  |
| Whsc1         | 1010 | 0.89 | 0.08 | XM_132006   |  |
| 0610039P13Rik | 107  | 0.89 | 0.18 | XM_149649.1 |  |
| Asb3          | 615  | 0.89 | 0.16 | NM_023906.2 |  |
| Evx1          | 56   | 0.89 | 0.37 | NM_007966.1 |  |
| Brd9          | 445  | 0.89 | 0.04 |             |  |
| Psen1         | 450  | 0.89 | 0.14 | BC014744    |  |
| A630076G18Rik | 41   | 0.89 | 0.20 | AK042261    |  |
| Clcn2         | 67   | 0.89 | 0.03 | XM_147240.1 |  |
| 1110007C24Rik | 4415 | 0.89 | 0.18 | NM_025382.3 |  |
| Txnip         | 4555 | 0.89 | 0.09 | NM_023719   |  |
| LOC386360     | 545  | 0.89 | 0.14 | XM_359184.1 |  |
| 4930550B20Rik | 152  | 0.89 | 0.09 | NM_152825.1 |  |
| LOC385923     | 190  | 0.89 | 0.15 | XM_359000.1 |  |
| Psme4         | 2685 | 0.89 | 0.24 | NM_134013.2 |  |
| Dpm1          | 76   | 0.89 | 0.20 | NM_010072.2 |  |
| Clpx          | 688  | 0.89 | 0.03 | NM_011802.1 |  |
| LOC385633     | 71   | 0.89 | 0.43 | XM_358813.1 |  |
| Pscd4         | 50   | 0.89 | 0.19 | NM_028195   |  |
| D5Erttd591e   | 795  | 0.89 | 0.05 |             |  |
| Zfp318        | 564  | 0.89 | 0.21 | NM_207671.2 |  |
| Vbp1          | 449  | 0.89 | 0.03 | AK051431    |  |

|               |      |      |      |             |  |
|---------------|------|------|------|-------------|--|
| A830007F21Rik | 75   | 0.89 | 0.06 | AK080590    |  |
| A130004B21Rik | 51   | 0.89 | 0.36 | AK037294    |  |
| LOC384533     | 70   | 0.89 | 0.07 | XM_357696.1 |  |
| C87860        | 426  | 0.89 | 0.12 | NM_133787   |  |
| E230017J10Rik | 97   | 0.89 | 0.14 | AK054093    |  |
| Gm527         | 69   | 0.89 | 0.01 |             |  |
| B9300075F07   | 1080 | 0.89 | 0.14 |             |  |
| Ibtk          | 954  | 0.89 | 0.28 | XM_135030.4 |  |
| 2400006A19Rik | 118  | 0.89 | 0.20 | NM_025550.2 |  |
| Il17          | 39   | 0.89 | 0.29 | NM_010552.2 |  |
| Mterfd3       | 125  | 0.89 | 0.05 |             |  |
| 0610012C01Rik | 31   | 0.89 | 0.57 | NM_026680.1 |  |
| Eif4g2        | 2226 | 0.89 | 0.39 | NM_013507.2 |  |
| Cmya1         | 47   | 0.89 | 0.19 | NM_011724.1 |  |
| LOC381200     | 478  | 0.89 | 0.14 | XM_355131.1 |  |
| A1591476      | 282  | 0.89 | 0.20 | NM_173406   |  |
| Ehhadh        | 61   | 0.89 | 0.27 | NM_023737.2 |  |
| 2610304I02Rik | 210  | 0.89 | 0.16 | AK011982    |  |
| Itpr3         | 1103 | 0.89 | 0.07 | NM_080553.1 |  |
| B230107K20Rik | 114  | 0.89 | 0.14 |             |  |
| 4833418A01Rik | 247  | 0.89 | 0.14 | AK032671    |  |
| 4732457N14    | 94   | 0.89 | 0.33 | NM_183304.1 |  |
| Man1c1        | 32   | 0.89 | 0.21 | NM_207237   |  |
| 0910001A06Rik | 136  | 0.89 | 0.03 | NM_144846.2 |  |
| Tbc1d2b       | 80   | 0.89 | 0.13 |             |  |
| 4833420G17Rik | 299  | 0.89 | 0.19 | AK014735    |  |
| Pak3          | 43   | 0.89 | 0.39 | NM_008778.1 |  |
| Dcamkl2       | 992  | 0.89 | 0.10 |             |  |
| LOC384860     | 42   | 0.89 | 0.24 | XM_357901.1 |  |
| Tpr           | 2556 | 0.89 | 0.07 | NM_133780.2 |  |
| 9430068D24Rik | 47   | 0.89 | 0.19 | AK034967    |  |
| C030014C12Rik | 239  | 0.89 | 0.19 |             |  |
| LOC270225     | 47   | 0.89 | 0.35 | XM_195298.2 |  |
| 6530406M24Rik | 39   | 0.89 | 0.12 | NM_178630.2 |  |
| Tubb4         | 64   | 0.89 | 0.26 | NM_009451.3 |  |
| Bcl7a         | 2373 | 0.89 | 0.12 | NM_029850.2 |  |
| Kif2c         | 1457 | 0.89 | 0.12 | NM_134471.2 |  |
| Lig4          | 67   | 0.89 | 0.19 | NM_176953.2 |  |
| Prune         | 354  | 0.89 | 0.16 |             |  |
| Aof1          | 223  | 0.89 | 0.21 | NM_172262   |  |
| 4921511I16Rik | 39   | 0.89 | 0.48 | NM_172407.1 |  |
| Bag4          | 953  | 0.89 | 0.04 | NM_026121.1 |  |
| 4930432B04Rik | 2114 | 0.89 | 0.10 | XM_130287.5 |  |
| Rhot1         | 1880 | 0.89 | 0.14 | NM_021536.5 |  |
| LOC381904     | 64   | 0.89 | 0.14 | XM_358675.1 |  |
| B130017I01Rik | 747  | 0.89 | 0.18 | NM_172525   |  |
| Gs2na-pending | 423  | 0.89 | 0.36 | AK088570    |  |
| A730023M06Rik | 54   | 0.89 | 0.36 | AK042776    |  |
| Tpcn1         | 578  | 0.89 | 0.30 | NM_145853.2 |  |
| LOC230143     | 45   | 0.89 | 0.08 | XM_149427.2 |  |
| Acvr1         | 798  | 0.89 | 0.14 | NM_007394.2 |  |
| Fbxl5         | 179  | 0.89 | 0.09 | AK054009    |  |
| Scg3          | 4232 | 0.89 | 0.07 | NM_009130.1 |  |
| 4933421E11Rik | 197  | 0.89 | 0.15 | NM_177309   |  |
| Cdkn1b        | 67   | 0.89 | 0.14 | NM_009875.2 |  |
| Prrt1         | 31   | 0.89 | 0.54 |             |  |
| D5Erttd579e   | 626  | 0.89 | 0.14 | XM_485595   |  |
| AU020772      | 776  | 0.89 | 0.13 | XM_204259.3 |  |
| 1810017N16Rik | 100  | 0.89 | 0.14 | NM_175402.3 |  |
| Tmod2         | 539  | 0.89 | 0.14 | NM_016711.2 |  |
| Zfp119        | 134  | 0.89 | 0.07 | NM_144546.3 |  |
| LOC384062     | 36   | 0.89 | 0.15 | XM_357395.1 |  |
| Rab9b         | 396  | 0.89 | 0.30 | NM_176971.1 |  |
| LOC385644     | 2462 | 0.89 | 0.13 | XM_358834.1 |  |
| LOC268730     | 3669 | 0.89 | 0.22 | XM_193754.2 |  |
| 1200003E16Rik | 989  | 0.89 | 0.11 | XM_130249.3 |  |
| Zbtb8         | 63   | 0.89 | 0.43 | NM_153541.1 |  |
| C130067A03Rik | 269  | 0.89 | 0.16 | NM_177239   |  |

|                |      |      |      |             |  |
|----------------|------|------|------|-------------|--|
| Arhgef2        | 406  | 0.89 | 0.06 | NM_008487   |  |
| 3732409C05Rik  | 66   | 0.89 | 0.29 | NM_027379.1 |  |
| Al427138       | 683  | 0.89 | 0.20 |             |  |
| 1500005I02Rik  | 52   | 0.89 | 0.39 | XM_484092   |  |
| 6430540A14Rik  | 67   | 0.89 | 0.27 | AK078251    |  |
| 4921529O18Rik  | 109  | 0.89 | 0.27 | NM_030070   |  |
| TRAV4D-2_AF259 | 44   | 0.89 | 0.19 |             |  |
| Ptma           | 4614 | 0.89 | 0.14 | NM_008972.1 |  |
| A730062O07Rik  | 56   | 0.89 | 0.19 | AK043167    |  |
| 1700057G04Rik  | 43   | 0.89 | 0.35 |             |  |
| Coro1a         | 30   | 0.89 | 0.04 | NM_009898.2 |  |
| SImap          | 736  | 0.89 | 0.24 | NM_032008   |  |
| LOC380705      | 276  | 0.89 | 0.13 | XM_354618.1 |  |
| Pcdhb8         | 52   | 0.89 | 0.25 | NM_053133.1 |  |
| E230011J22Rik  | 62   | 0.89 | 0.20 | AK054000    |  |
| 4933435A13Rik  | 247  | 0.89 | 0.17 | NM_028956   |  |
| 1700080P15Rik  | 39   | 0.89 | 0.32 | AK006960    |  |
| 2010204I15Rik  | 239  | 0.89 | 0.28 | NM_146133.2 |  |
| A630034I12Rik  | 174  | 0.89 | 0.13 |             |  |
| 2610005L07Rik  | 31   | 0.89 | 0.44 | XM_196548.3 |  |
| Card10         | 140  | 0.89 | 0.32 | NM_130859.2 |  |
| 9030003C19Rik  | 77   | 0.89 | 0.19 | AK033415    |  |
| D430018E21Rik  | 161  | 0.89 | 0.16 | AK052427    |  |
| 2410005H09Rik  | 37   | 0.89 | 0.17 | NM_146183   |  |
| Gig1           | 588  | 0.89 | 0.08 | NM_133218.1 |  |
| Al661311       | 64   | 0.89 | 0.25 | XM_359298.1 |  |
| 1110064P04Rik  | 93   | 0.89 | 0.18 | NM_172391.2 |  |
| 6230409E13Rik  | 59   | 0.89 | 0.10 | NM_175234   |  |
| Wdr47          | 103  | 0.89 | 0.21 |             |  |
| Slc39a3        | 124  | 0.89 | 0.29 | NM_134135.1 |  |
| Stk38l         | 370  | 0.89 | 0.22 | NM_172734.2 |  |
| 6720463M24Rik  | 326  | 0.89 | 0.05 | NM_175265.2 |  |
| LOC381284      | 91   | 0.89 | 0.06 | XM_355224.1 |  |
| Akap9          | 2698 | 0.89 | 0.12 | NM_194462.1 |  |
| LOC381092      | 69   | 0.89 | 0.41 | XM_110216.2 |  |
| Hsd17b4        | 2079 | 0.89 | 0.05 | NM_008292.2 |  |
| 2610039E05Rik  | 70   | 0.89 | 0.15 | NM_030176.2 |  |
| Uhrf2          | 1798 | 0.89 | 0.09 | NM_144873.1 |  |
| scl0002690.1_1 | 43   | 0.89 | 0.17 |             |  |
| B130008D24Rik  | 39   | 0.89 | 0.69 | AK044854    |  |
| C230070D10Rik  | 1781 | 0.89 | 0.11 | AK082620    |  |
| Cbfb           | 2822 | 0.89 | 0.08 | NM_022309.2 |  |
| Cln8           | 34   | 0.89 | 0.08 | NM_012000.2 |  |
| Lpp            | 168  | 0.89 | 0.21 | NM_178665.3 |  |
| Sfrs3          | 938  | 0.89 | 0.14 | NM_013663.3 |  |
| Acas2          | 882  | 0.89 | 0.19 | NM_019811.2 |  |
| C230082I21Rik  | 1020 | 0.89 | 0.05 |             |  |
| 5033403J15Rik  | 910  | 0.89 | 0.11 | XM_484707   |  |
| LOC239122      | 52   | 0.89 | 0.55 | XM_139089.3 |  |
| Bruno16        | 101  | 0.89 | 0.54 | NM_175235.3 |  |
| Btg1           | 3225 | 0.89 | 0.09 | NM_007569.1 |  |
| A530024C08Rik  | 281  | 0.89 | 0.19 | AK040772    |  |
| Armc8          | 536  | 0.89 | 0.14 | NM_028768.1 |  |
| D130050A01Rik  | 143  | 0.89 | 0.10 | AK051458    |  |
| A930008G19Rik  | 49   | 0.89 | 0.37 | NM_175268.3 |  |
| Plekhg2        | 437  | 0.89 | 0.18 |             |  |
| Rabep1         | 199  | 0.89 | 0.23 | NM_019400.1 |  |
| A930040G15Rik  | 444  | 0.89 | 0.22 | NM_133922   |  |
| Snx16          | 451  | 0.89 | 0.16 | NM_029068.2 |  |
| Slc9a6         | 39   | 0.89 | 0.44 | NM_172780   |  |
| Adrb3          | 52   | 0.89 | 0.09 | NM_013462.1 |  |
| Chek2          | 117  | 0.89 | 0.03 | NM_016681.2 |  |
| Ep300          | 395  | 0.89 | 0.04 | XM_484488   |  |
| Cenpi          | 429  | 0.89 | 0.26 |             |  |
| C030003H22Rik  | 229  | 0.88 | 0.23 |             |  |
| Wbscr27        | 59   | 0.88 | 0.22 | NM_024479   |  |
| Sorbs1         | 103  | 0.88 | 0.05 | NM_009166   |  |
| Ttc7b          | 631  | 0.88 | 0.10 | XM_127105.4 |  |

|               |       |      |      |             |  |
|---------------|-------|------|------|-------------|--|
| Mia3          | 71    | 0.88 | 0.03 | NM_177389.2 |  |
| Mlh3          | 232   | 0.88 | 0.21 | XM_484162   |  |
| Mapk4         | 111   | 0.88 | 0.19 | NM_172632.1 |  |
| B230206H07Rik | 55    | 0.88 | 0.24 | NM_177280.2 |  |
| LOC381283     | 13083 | 0.88 | 0.18 | XM_358544.1 |  |
| 4933417E01Rik | 45    | 0.88 | 0.44 | NM_028954.1 |  |
| 9130206N08Rik | 33    | 0.88 | 0.21 | XM_125729.4 |  |
| 9830001H06Rik | 604   | 0.88 | 0.13 | XM_283804.2 |  |
| Cd97          | 204   | 0.88 | 0.10 | NM_011925.1 |  |
| Rasgef1b      | 63    | 0.88 | 0.14 | NM_181318.2 |  |
| 0610010K06Rik | 1892  | 0.88 | 0.12 | AK002489    |  |
| 2510003E04Rik | 487   | 0.88 | 0.21 | NM_028197.1 |  |
| Pitpnm1       | 86    | 0.88 | 0.21 | NM_008851.1 |  |
| Zfp609        | 42    | 0.88 | 0.32 | NM_172536.1 |  |
| 4732418C07Rik | 1077  | 0.88 | 0.04 | NM_172698.2 |  |
| Arl9          | 43    | 0.88 | 0.17 | NM_206935.1 |  |
| Bclaf1        | 1368  | 0.88 | 0.22 | NM_153787   |  |
| Rnf34         | 867   | 0.88 | 0.12 | NM_030564.1 |  |
| A930037O16Rik | 38    | 0.88 | 0.07 |             |  |
| Mllt1         | 69    | 0.88 | 0.04 | NM_022328.2 |  |
| LOC383269     | 39    | 0.88 | 0.11 | XM_356956.1 |  |
| Cry2          | 89    | 0.88 | 0.13 | AK037778    |  |
| Arhgef1       | 223   | 0.88 | 0.26 | AK040093    |  |
| 1110030L07Rik | 34    | 0.88 | 0.35 | NM_178614   |  |
| 4833406C17Rik | 233   | 0.88 | 0.18 | AK029366    |  |
| Lars2         | 1344  | 0.88 | 0.05 | NM_153168.1 |  |
| Mpp7          | 230   | 0.88 | 0.33 | XM_128966.4 |  |
| Map3k3        | 1023  | 0.88 | 0.06 | NM_011947.1 |  |
| Acpp          | 48    | 0.88 | 0.10 | NM_207668.1 |  |
| Zfp219        | 772   | 0.88 | 0.16 | NM_027248   |  |
| 4933439C20Rik | 3131  | 0.88 | 0.01 | AK007420    |  |
| LOC386270     | 243   | 0.88 | 0.23 | XM_359149.1 |  |
| Acy112        | 66    | 0.88 | 0.11 |             |  |
| E130208E03Rik | 43    | 0.88 | 0.33 | AK053696    |  |
| Lass4         | 32    | 0.88 | 0.63 | NM_026058.2 |  |
| Gng7          | 71    | 0.88 | 0.06 | NM_010319.2 |  |
| Nfkbiz        | 629   | 0.88 | 0.24 | NM_030612   |  |
| BC003993      | 465   | 0.88 | 0.08 | AK039942    |  |
| Prkacb        | 6351  | 0.88 | 0.14 | NM_011100.3 |  |
| LOC329357     | 661   | 0.88 | 0.04 | XM_131311.4 |  |
| LOC545253     | 31    | 0.88 | 0.25 |             |  |
| Jak2          | 214   | 0.88 | 0.24 | NM_008413.1 |  |
| 5730406F04Rik | 167   | 0.88 | 0.08 | AK077424    |  |
| LOC384301     | 46    | 0.88 | 0.21 | XM_357554.1 |  |
| Pten          | 129   | 0.88 | 0.12 | NM_008960.1 |  |
| LOC268663     | 31    | 0.88 | 0.61 | XM_193722.3 |  |
| 2310011G17Rik | 462   | 0.88 | 0.11 |             |  |
| A730021C13Rik | 580   | 0.88 | 0.13 | AK042754    |  |
| Atp6v0a1      | 864   | 0.88 | 0.24 | NM_016920.1 |  |
| Ntn3          | 54    | 0.88 | 0.15 | NM_010947.2 |  |
| LOC382510     | 232   | 0.88 | 0.05 | XM_356540.1 |  |
| Nuff2         | 503   | 0.88 | 0.30 | NM_026532.2 |  |
| Dp1           | 1471  | 0.88 | 0.11 | NM_007874.2 |  |
| Cpeb2         | 71    | 0.88 | 0.19 | NM_175937.2 |  |
| Spata20       | 32    | 0.88 | 0.24 |             |  |
| 9230110M18Rik | 1128  | 0.88 | 0.27 | XM_355515.1 |  |
| LOC229494     | 40    | 0.88 | 0.14 | XM_143290.1 |  |
| Ptbp2         | 45    | 0.88 | 0.30 | AK084846    |  |
| Smarcd1       | 36    | 0.88 | 0.18 | NM_031842   |  |
| Smcx          | 155   | 0.88 | 0.27 | AK028739    |  |
| Smc6l1        | 937   | 0.88 | 0.17 | NM_025695.2 |  |
| Echdc1        | 153   | 0.88 | 0.29 | NM_025855.2 |  |
| Gapvd1        | 1585  | 0.88 | 0.09 |             |  |
| Abca5         | 103   | 0.88 | 0.19 | NM_147219.1 |  |
| A930024E05Rik | 58    | 0.88 | 0.27 | NM_175405.2 |  |
| Slit2         | 46    | 0.88 | 0.25 | NM_139307   |  |
| C630029K18Rik | 311   | 0.88 | 0.07 | NM_144871.2 |  |
| D230045O07Rik | 162   | 0.88 | 0.24 | AK052099    |  |

|                |      |      |      |             |  |
|----------------|------|------|------|-------------|--|
| Tbc1d1         | 507  | 0.88 | 0.21 | AK080526    |  |
| Tnfrsf22       | 82   | 0.88 | 0.12 | NM_023680.2 |  |
| D430005F24Rik  | 203  | 0.88 | 0.09 | AK084883    |  |
| A030007D23Rik  | 43   | 0.88 | 0.18 | NM_178763.2 |  |
| Nova1          | 49   | 0.88 | 0.13 | XM_356586   |  |
| Cnm2           | 1091 | 0.88 | 0.14 | AK044400    |  |
| Cd1d1          | 90   | 0.88 | 0.17 | NM_007639.1 |  |
| Ccnl1          | 614  | 0.88 | 0.13 | NM_019937.1 |  |
| Dip3b          | 1527 | 0.88 | 0.02 | NM_145220.1 |  |
| Mki67          | 1341 | 0.88 | 0.16 | XM_133912.3 |  |
| Leo1           | 581  | 0.88 | 0.25 |             |  |
| 2810439M11Rik  | 167  | 0.88 | 0.06 | NM_183091.2 |  |
| Car4           | 34   | 0.88 | 0.25 | NM_007607.1 |  |
| Pard6g         | 5356 | 0.88 | 0.12 | NM_053117.2 |  |
| Angel2         | 2256 | 0.88 | 0.13 |             |  |
| C230043G09Rik  | 1505 | 0.88 | 0.06 | AK048752    |  |
| Ube2q2         | 376  | 0.88 | 0.19 |             |  |
| LOC386246      | 385  | 0.88 | 0.27 | XM_359137.1 |  |
| Podxl          | 484  | 0.88 | 0.24 | NM_013723.2 |  |
| BC003236       | 176  | 0.88 | 0.11 | NM_030249   |  |
| D12Ert7e       | 432  | 0.88 | 0.10 |             |  |
| Nrf1           | 554  | 0.88 | 0.23 | NM_010938.2 |  |
| 4931406P16Rik  | 908  | 0.88 | 0.12 | NM_172741.1 |  |
| Slc24a4        | 60   | 0.88 | 0.16 | NM_172152.1 |  |
| Slc1a4         | 1160 | 0.88 | 0.17 | NM_018861.2 |  |
| 1700009P03Rik  | 117  | 0.88 | 0.32 | NM_134077   |  |
| Gcc2           | 1128 | 0.88 | 0.22 |             |  |
| E130014J05Rik  | 234  | 0.88 | 0.35 | NM_145989.1 |  |
| scl0003903.1_2 | 1677 | 0.88 | 0.22 |             |  |
| Lbh            | 1531 | 0.88 | 0.38 | NM_029999.3 |  |
| 2010300G19Rik  | 1280 | 0.88 | 0.16 | NM_028097.2 |  |
| Ankrd12        | 545  | 0.88 | 0.11 |             |  |
| KIF23          | 1072 | 0.88 | 0.04 | AK013939    |  |
| Zc3h14         | 2027 | 0.88 | 0.15 |             |  |
| Kpna3          | 576  | 0.88 | 0.34 | NM_008466.2 |  |
| Actn4          | 2187 | 0.88 | 0.15 | NM_021895.2 |  |
| Ccdc96         | 113  | 0.88 | 0.09 |             |  |
| Dncic2         | 2571 | 0.88 | 0.10 | AK019441    |  |
| Pign           | 149  | 0.88 | 0.22 | NM_013784.1 |  |
| Mospd1         | 395  | 0.88 | 0.19 | NM_027409   |  |
| Err1           | 222  | 0.88 | 0.23 | AK018505    |  |
| Gphn           | 2010 | 0.88 | 0.05 | NM_172952.1 |  |
| Rad54l         | 248  | 0.88 | 0.09 | AK017045    |  |
| LOC232286      | 836  | 0.88 | 0.16 | XM_132740.2 |  |
| Orc4l          | 103  | 0.88 | 0.27 | NM_011958.2 |  |
| Nsmf           | 236  | 0.88 | 0.18 | NM_010945.1 |  |
| B230373P09Rik  | 961  | 0.88 | 0.22 | NM_177336.2 |  |
| Mil1-pending   | 138  | 0.88 | 0.10 | AK052896    |  |
| Ctcf           | 633  | 0.88 | 0.18 | NM_007794.1 |  |
| Tars           | 164  | 0.88 | 0.25 | NM_033074.2 |  |
| Eps15-rs       | 469  | 0.88 | 0.17 | NM_007944   |  |
| 6430515G22Rik  | 262  | 0.88 | 0.15 | AK032284    |  |
| Spnb1          | 47   | 0.88 | 0.11 | NM_013675   |  |
| LOC333459      | 40   | 0.88 | 0.14 | XM_285586.2 |  |
| 1200013P24Rik  | 139  | 0.88 | 0.19 | NM_029090.2 |  |
| Map3k8         | 35   | 0.88 | 0.29 | AK041009    |  |
| Ivns1abp       | 1934 | 0.88 | 0.15 | NM_028582   |  |
| 3110002L15Rik  | 517  | 0.88 | 0.22 | NM_026665.2 |  |
| LOC268853      | 75   | 0.88 | 0.27 | XM_196141.2 |  |
| Neto2          | 679  | 0.88 | 0.29 | XM_134498   |  |
| Myo5a          | 122  | 0.88 | 0.16 | AK032713    |  |
| 4930524E20Rik  | 37   | 0.88 | 0.11 | XM_284734.1 |  |
| Pb1            | 472  | 0.88 | 0.23 | XM_484357   |  |
| Cdk1l          | 31   | 0.88 | 0.35 | NM_183294.1 |  |
| Slc37a1        | 118  | 0.88 | 0.11 | AK028984    |  |
| Tmem102        | 94   | 0.88 | 0.28 |             |  |
| Pde5a          | 35   | 0.88 | 0.29 | NM_153422.1 |  |
| LOC270589      | 157  | 0.88 | 0.16 | XM_193524.2 |  |

|                 |      |      |      |             |  |
|-----------------|------|------|------|-------------|--|
| 9830139D05Rik   | 817  | 0.88 | 0.14 | AK036600    |  |
| 0610009J22Rik   | 96   | 0.88 | 0.12 | NM_027859.1 |  |
| Cyln2           | 174  | 0.88 | 0.13 | NM_009990   |  |
| Zbtb24          | 1614 | 0.88 | 0.06 | NM_153398.2 |  |
| A630090P18      | 40   | 0.88 | 0.22 | NM_177633.2 |  |
| Nup50           | 251  | 0.88 | 0.07 | NM_016714.2 |  |
| Wdr77           | 201  | 0.88 | 0.24 |             |  |
| Slc37a3         | 117  | 0.88 | 0.29 | NM_028123.1 |  |
| Eefsec          | 63   | 0.88 | 0.13 | AK087501    |  |
| Sgk3            | 699  | 0.88 | 0.20 | NM_177547.2 |  |
| Ptp4a1          | 2229 | 0.88 | 0.02 | NM_011200   |  |
| Nr2c1           | 203  | 0.88 | 0.08 | NM_011629.2 |  |
| scl000490.1_983 | 1381 | 0.88 | 0.19 |             |  |
| BC016226        | 466  | 0.88 | 0.18 | NM_145443.1 |  |
| 1110065L07Rik   | 41   | 0.88 | 0.36 | XM_133990   |  |
| 4921521J11Rik   | 696  | 0.88 | 0.01 | NM_027590.1 |  |
| 5033413D16Rik   | 206  | 0.88 | 0.26 |             |  |
| Zfp322a         | 101  | 0.88 | 0.04 | NM_172586.2 |  |
| Taf6l           | 65   | 0.88 | 0.44 | NM_146092.1 |  |
| Ube2a           | 299  | 0.88 | 0.25 | NM_019668.2 |  |
| Ddx3x           | 2018 | 0.88 | 0.14 | NM_010028   |  |
| Aprin           | 2085 | 0.88 | 0.19 | NM_175310.3 |  |
| Rab8b           | 987  | 0.88 | 0.18 | NM_173413.2 |  |
| Zzz3            | 89   | 0.88 | 0.24 | NM_198416.1 |  |
| LOC238803       | 42   | 0.88 | 0.25 | XM_138810.2 |  |
| 5730593F17Rik   | 342  | 0.88 | 0.30 | NM_172543.1 |  |
| Epb4.1l2        | 172  | 0.88 | 0.16 | NM_013511.1 |  |
| D2Bwg1356e      | 5822 | 0.88 | 0.17 | XM_130523.3 |  |
| 4930465M17Rik   | 49   | 0.88 | 0.19 | XM_486083   |  |
| Tank            | 501  | 0.88 | 0.08 | NM_011529.1 |  |
| Krt15           | 31   | 0.88 | 0.22 |             |  |
| Cyfp2           | 338  | 0.88 | 0.23 | XM_147526.1 |  |
| Ssfa2           | 1873 | 0.88 | 0.06 | NM_080558.3 |  |
| Pla2g6          | 308  | 0.88 | 0.06 | NM_016915.2 |  |
| Evi5            | 1524 | 0.88 | 0.30 | NM_007964.1 |  |
| Ankrd17         | 243  | 0.88 | 0.27 | NM_030886.2 |  |
| Al591529        | 88   | 0.88 | 0.19 | NM_133841.1 |  |
| D430007A19Rik   | 73   | 0.88 | 0.09 |             |  |
| 9845300_5100    | 41   | 0.88 | 0.19 |             |  |
| Al481105        | 138  | 0.88 | 0.09 | XM_130703.4 |  |
| Stard13         | 142  | 0.88 | 0.25 | NM_146258.1 |  |
| A930002H24Rik   | 76   | 0.88 | 0.29 | AK044233    |  |
| Snx19           | 105  | 0.88 | 0.21 | NM_028874   |  |
| Atxn3           | 272  | 0.88 | 0.16 |             |  |
| B4galnt4        | 404  | 0.88 | 0.15 |             |  |
| Atp11b          | 266  | 0.88 | 0.07 | XM_358349   |  |
| Bcas3           | 543  | 0.88 | 0.11 | NM_138681.2 |  |
| Htr3a           | 288  | 0.88 | 0.16 | NM_013561.1 |  |
| Map3k7ip3       | 836  | 0.88 | 0.12 |             |  |
| 2610034H20Rik   | 63   | 0.88 | 0.27 | NM_029585.2 |  |
| Sfxn4           | 44   | 0.88 | 0.11 | NM_053198   |  |
| Rad18           | 71   | 0.88 | 0.40 | NM_021385.1 |  |
| P4ha1           | 1408 | 0.88 | 0.11 | NM_011030.1 |  |
| LOC385982       | 57   | 0.88 | 0.39 | XM_359024.1 |  |
| Sort1           | 1542 | 0.88 | 0.14 | NM_019972.2 |  |
| Ank3            | 76   | 0.87 | 0.17 | NM_170728.1 |  |
| A530050N04Rik   | 52   | 0.87 | 0.09 | AK080033    |  |
| 2310036D22Rik   | 278  | 0.87 | 0.20 | NM_027992   |  |
| C030034J23Rik   | 107  | 0.87 | 0.21 | AK081262    |  |
| Unc84a          | 1947 | 0.87 | 0.11 | NM_024451.1 |  |
| LOC237877       | 765  | 0.87 | 0.28 | XM_111221.4 |  |
| Myo1e           | 336  | 0.87 | 0.16 | NM_181072.2 |  |
| Cd47            | 1472 | 0.87 | 0.06 | NM_010581.3 |  |
| Hook3           | 45   | 0.87 | 0.46 | NM_207659   |  |
| 2900097C17Rik   | 101  | 0.87 | 0.14 | XM_485090   |  |
| Apg3l           | 662  | 0.87 | 0.10 | NM_026402.1 |  |
| Ap2a1           | 733  | 0.87 | 0.35 | NM_007458.1 |  |
| LOC386256       | 105  | 0.87 | 0.12 | XM_359142.1 |  |

|               |      |      |      |             |  |
|---------------|------|------|------|-------------|--|
| BC027088      | 234  | 0.87 | 0.11 | NM_146156.2 |  |
| A930004J17Rik | 167  | 0.87 | 0.17 |             |  |
| LOC215958     | 185  | 0.87 | 0.15 | XM_125568.1 |  |
| 5530400K22Rik | 725  | 0.87 | 0.25 |             |  |
| Mapre2        | 501  | 0.87 | 0.11 | NM_153058.2 |  |
| Hoxc13        | 33   | 0.87 | 0.45 | NM_010464.1 |  |
| 3110050N22Rik | 1000 | 0.87 | 0.25 | NM_173181.1 |  |
| C330019G07Rik | 241  | 0.87 | 0.20 | NM_194340.1 |  |
| Tef           | 145  | 0.87 | 0.34 | NM_153484.1 |  |
| Trim36        | 150  | 0.87 | 0.15 | NM_178872.3 |  |
| Zfp612        | 199  | 0.87 | 0.04 | NM_175480   |  |
| 4931403M11Rik | 48   | 0.87 | 0.21 | NM_027621.1 |  |
| Al448196      | 2132 | 0.87 | 0.13 | XM_136041.3 |  |
| Ric3          | 485  | 0.87 | 0.03 |             |  |
| Tyki          | 229  | 0.87 | 0.25 | NM_020557.3 |  |
| Sft2d2        | 606  | 0.87 | 0.04 |             |  |
| BC020002      | 1803 | 0.87 | 0.19 | NM_145374.1 |  |
| BC031575      | 102  | 0.87 | 0.21 | NM_153549.2 |  |
| 4930470O13Rik | 238  | 0.87 | 0.05 |             |  |
| Syt14l        | 273  | 0.87 | 0.12 | NM_172804.1 |  |
| Macf1         | 102  | 0.87 | 0.16 | XM_110503   |  |
| 4921533L14Rik | 1242 | 0.87 | 0.12 | NM_026604.2 |  |
| A630039F14Rik | 89   | 0.87 | 0.09 | XM_146705.4 |  |
| Tyw1          | 320  | 0.87 | 0.18 |             |  |
| LOC239766     | 244  | 0.87 | 0.15 | XM_155893.4 |  |
| Nrbp          | 203  | 0.87 | 0.11 | NM_147201.1 |  |
| C230021J06Rik | 39   | 0.87 | 0.26 | AK048720    |  |
| Slc35e3       | 183  | 0.87 | 0.14 | NM_029875   |  |
| Uimc1         | 103  | 0.87 | 0.09 |             |  |
| 1110038D17Rik | 737  | 0.87 | 0.03 | XM_483920   |  |
| Actr3         | 2767 | 0.87 | 0.05 | NM_023735   |  |
| 2700078E11Rik | 130  | 0.87 | 0.21 | XM_129335.2 |  |
| Slc39a10      | 139  | 0.87 | 0.26 | NM_172653.2 |  |
| End2          | 88   | 0.87 | 0.30 |             |  |
| D030029J20Rik | 242  | 0.87 | 0.15 |             |  |
| B930085E10Rik | 33   | 0.87 | 0.49 | AK081094    |  |
| Sclt1         | 76   | 0.87 | 0.12 |             |  |
| Pak1          | 200  | 0.87 | 0.29 | NM_011035   |  |
| C430014M02Rik | 51   | 0.87 | 0.44 | AK049459    |  |
| D230016N13Rik | 98   | 0.87 | 0.15 | NM_178640   |  |
| Gucy2c        | 94   | 0.87 | 0.38 | XM_132928.3 |  |
| BC049806      | 655  | 0.87 | 0.23 | NM_172513.2 |  |
| LOC381219     | 117  | 0.87 | 0.20 | XM_355157.1 |  |
| Pias1         | 1627 | 0.87 | 0.03 | NM_019663.2 |  |
| Sstk          | 39   | 0.87 | 0.40 | NM_032004.1 |  |
| LOC245666     | 283  | 0.87 | 0.17 | XM_142229.4 |  |
| LOC240779     | 61   | 0.87 | 0.37 | XM_136256.4 |  |
| Hcfc1r1       | 76   | 0.87 | 0.19 | NM_181821.1 |  |
| LOC218805     | 135  | 0.87 | 0.13 | NM_172379.1 |  |
| 8030448M07Rik | 421  | 0.87 | 0.22 | AK033160    |  |
| Mpdz          | 128  | 0.87 | 0.13 | AK036044    |  |
| LOC226036     | 47   | 0.87 | 0.31 | XM_123387.2 |  |
| Krr1          | 51   | 0.87 | 0.19 |             |  |
| AA407452      | 338  | 0.87 | 0.25 | XM_145140.3 |  |
| 9330134C04Rik | 1551 | 0.87 | 0.08 |             |  |
| 9930031P18Rik | 170  | 0.87 | 0.44 |             |  |
| 2810485I05Rik | 2248 | 0.87 | 0.17 | NM_176836.2 |  |
| Sprr2a        | 367  | 0.87 | 0.28 | NM_011468.2 |  |
| Atad1         | 3648 | 0.87 | 0.15 | NM_026487.2 |  |
| Slc4a7        | 1142 | 0.87 | 0.09 | XM_147798.4 |  |
| Ranbp10       | 798  | 0.87 | 0.17 | NM_145824.3 |  |
| Nedd1         | 1647 | 0.87 | 0.23 | NM_008682   |  |
| LOC385201     | 938  | 0.87 | 0.10 | XM_358115.1 |  |
| 2610017J04Rik | 4594 | 0.87 | 0.14 |             |  |
| LOC211970     | 814  | 0.87 | 0.20 | XM_125419.3 |  |
| Papln         | 57   | 0.87 | 0.10 | NM_130887.1 |  |
| BC051142      | 106  | 0.87 | 0.01 |             |  |
| Cort          | 90   | 0.87 | 0.09 | NM_007745.2 |  |

|               |       |      |      |             |  |
|---------------|-------|------|------|-------------|--|
| 4632404H22Rik | 587   | 0.87 | 0.11 | NM_030167.1 |  |
| AL033326      | 1152  | 0.87 | 0.11 | NM_019705.2 |  |
| Dscr3         | 352   | 0.87 | 0.14 | NM_007834.1 |  |
| D430017M14Rik | 36    | 0.87 | 0.52 | AK052425    |  |
| Rac1          | 950   | 0.87 | 0.13 | NM_009007.1 |  |
| Atp6a1        | 1608  | 0.87 | 0.21 | XM_147267.1 |  |
| Gal3st1       | 58    | 0.87 | 0.12 | NM_016922.2 |  |
| Pank3         | 247   | 0.87 | 0.15 | NM_145962.1 |  |
| B230384C22Rik | 102   | 0.87 | 0.16 | AK046429    |  |
| Donson        | 958   | 0.87 | 0.15 | NM_021720.1 |  |
| Fads1         | 11359 | 0.87 | 0.02 | NM_146094.1 |  |
| Obfc2a        | 772   | 0.87 | 0.26 |             |  |
| 4122402O22Rik | 113   | 0.87 | 0.14 | NM_029945   |  |
| LOC383092     | 37    | 0.87 | 0.15 | XM_356868.1 |  |
| 1190012C08Rik | 80    | 0.87 | 0.20 | AK028016    |  |
| 4921511H13Rik | 66    | 0.87 | 0.19 | XM_128377   |  |
| 9830141K10Rik | 1036  | 0.87 | 0.05 | AK036615    |  |
| Mlr2          | 97    | 0.87 | 0.43 | NM_172154   |  |
| Pfc           | 741   | 0.87 | 0.08 | XM_135820.3 |  |
| Homer3        | 39    | 0.87 | 0.35 | NM_011984.1 |  |
| Xrn1          | 132   | 0.87 | 0.10 | NM_011916.1 |  |
| Arhgap21      | 2132  | 0.87 | 0.18 | XM_130033.5 |  |
| Foxo3         | 49    | 0.87 | 0.36 | NM_019740.1 |  |
| Myo10         | 113   | 0.87 | 0.13 | NM_019472   |  |
| 4930449E07Rik | 123   | 0.87 | 0.07 | NM_029044.1 |  |
| 1200016D23Rik | 404   | 0.87 | 0.14 | NM_028776.3 |  |
| 6430573H23Rik | 84    | 0.87 | 0.41 | AK032505    |  |
| 9630002H22Rik | 50    | 0.87 | 0.13 | XM_126554.5 |  |
| BC027174      | 168   | 0.87 | 0.18 | NM_172260.1 |  |
| Pex13         | 61    | 0.87 | 0.06 | NM_023651.2 |  |
| A130082N24Rik | 131   | 0.87 | 0.39 | AK038156    |  |
| Kif13b        | 40    | 0.87 | 0.17 | XM_283218   |  |
| A430042F24Rik | 37    | 0.87 | 0.16 |             |  |
| Dhx8          | 226   | 0.87 | 0.10 | NM_144831.1 |  |
| Suv39h1       | 155   | 0.87 | 0.11 | AK021174    |  |
| Osbp2         | 68    | 0.87 | 0.17 | NM_152818.1 |  |
| Zfyve16       | 213   | 0.87 | 0.24 | NM_173392.1 |  |
| Adam9         | 924   | 0.87 | 0.33 | NM_007404.1 |  |
| 5730406M06Rik | 827   | 0.87 | 0.08 | XM_283936.2 |  |
| Sugt1         | 51    | 0.87 | 0.44 | NM_026474.2 |  |
| Jmjd2b        | 905   | 0.87 | 0.09 | NM_172132.1 |  |
| Thrap4        | 1856  | 0.87 | 0.11 | NM_011869   |  |
| Itgb4         | 61    | 0.87 | 0.06 | XM_109756.3 |  |
| Cul3          | 8140  | 0.87 | 0.12 | NM_016716   |  |
| D13Wsu64e     | 457   | 0.87 | 0.22 | NM_172585.1 |  |
| A430110N23    | 32    | 0.87 | 0.20 | NM_173008.1 |  |
| LOC329701     | 35    | 0.87 | 0.44 | XM_283864.2 |  |
| Cdc6          | 305   | 0.87 | 0.06 | NM_011799.1 |  |
| 1700066M21Rik | 38    | 0.87 | 0.62 | XM_129727.2 |  |
| Papss1        | 2010  | 0.87 | 0.11 | BC066055    |  |
| LOC243737     | 50    | 0.87 | 0.24 | XM_145243.1 |  |
| 3830408P04Rik | 703   | 0.87 | 0.15 | NM_023647   |  |
| Olf1r591      | 30    | 0.87 | 0.39 |             |  |
| AI875199      | 103   | 0.87 | 0.19 | NM_153591.2 |  |
| LOC381625     | 60    | 0.87 | 0.26 | XM_355584.1 |  |
| Rnf141        | 310   | 0.87 | 0.27 | NM_025999.1 |  |
| Hipk3         | 272   | 0.87 | 0.15 | NM_010434.1 |  |
| Si            | 47    | 0.87 | 0.20 | NM_021882.2 |  |
| Abcb7         | 1564  | 0.87 | 0.22 | XM_356348.1 |  |
| Aftph         | 2408  | 0.87 | 0.03 |             |  |
| LOC385865     | 78    | 0.87 | 0.19 | XM_358975.1 |  |
| Parva         | 766   | 0.87 | 0.15 | NM_020606.4 |  |
| 4933424B01Rik | 727   | 0.87 | 0.07 | NM_138757.1 |  |
| B130052F17Rik | 141   | 0.87 | 0.26 | AK045259    |  |
| BC008171      | 191   | 0.87 | 0.18 | XM_135068.1 |  |
| Top1          | 698   | 0.87 | 0.17 | NM_009408.1 |  |
| A230057G18Rik | 480   | 0.87 | 0.09 | XM_489103   |  |
| Pkd2          | 562   | 0.87 | 0.18 | NM_008861.2 |  |



|                  |      |      |      |              |  |
|------------------|------|------|------|--------------|--|
| 4632427E13Rik    | 344  | 0.87 | 0.18 |              |  |
| Prpf31           | 57   | 0.87 | 0.12 | NM_027328.2  |  |
| LOC217372        | 88   | 0.87 | 0.21 | XM_126827.4  |  |
| BC061237         | 33   | 0.87 | 0.38 |              |  |
| C030027K23Rik    | 324  | 0.87 | 0.13 | XM_127766.2  |  |
| 1810031K17Rik    | 147  | 0.87 | 0.37 | NM_026977.1  |  |
| Snx5             | 90   | 0.87 | 0.15 | AK003091     |  |
| C1qtnf2          | 36   | 0.87 | 0.29 | XM_126141.3  |  |
| BC037674         | 1334 | 0.87 | 0.10 | NM_001004436 |  |
| Hnrph1           | 1470 | 0.87 | 0.10 | NM_021510.1  |  |
| Col17a1          | 248  | 0.87 | 0.12 | NM_007732.1  |  |
| 6330408A02Rik    | 52   | 0.87 | 0.25 | NM_177312.2  |  |
| Usp52            | 401  | 0.87 | 0.13 | NM_133992.1  |  |
| Xrcc4            | 105  | 0.87 | 0.16 | NM_028012.1  |  |
| B230312E02Rik    | 73   | 0.87 | 0.24 | AK080817     |  |
| D030011O10Rik    | 105  | 0.87 | 0.07 | NM_177192.2  |  |
| BB114266         | 185  | 0.87 | 0.18 | NM_172763.1  |  |
| Cutl1            | 225  | 0.87 | 0.06 | NM_198602.1  |  |
| Ncoa6ip          | 224  | 0.87 | 0.13 | NM_054089.2  |  |
| Sh3bgrl2         | 478  | 0.87 | 0.14 | NM_172507    |  |
| LOC385063        | 56   | 0.87 | 0.06 | XM_358027.1  |  |
| LOC240110        | 43   | 0.87 | 0.24 | XM_140042.4  |  |
| 2310007G05Rik    | 584  | 0.87 | 0.34 | AK009204     |  |
| 4930438D12Rik    | 226  | 0.87 | 0.24 | NM_175212.2  |  |
| Ush2a            | 236  | 0.87 | 0.11 | AK020845     |  |
| 8030462N17Rik    | 157  | 0.87 | 0.11 | NM_178670    |  |
| Rbm41            | 100  | 0.87 | 0.19 |              |  |
| 4933411D12Rik    | 176  | 0.87 | 0.22 |              |  |
| Ppp3cc           | 120  | 0.87 | 0.25 | NM_008915.1  |  |
| Plekha4          | 47   | 0.87 | 0.06 | NM_148927.1  |  |
| Rps6kb2          | 36   | 0.87 | 0.27 | NM_021485.1  |  |
| Rps6kb1          | 38   | 0.87 | 0.16 | NM_028259.1  |  |
| mKIAA1457        | 35   | 0.86 | 0.22 | AK129364     |  |
| Apaf1            | 696  | 0.86 | 0.23 | NM_009684.1  |  |
| Dnaja4           | 195  | 0.86 | 0.30 | NM_021422.2  |  |
| Xpc              | 253  | 0.86 | 0.06 | NM_009531.1  |  |
| LOC383022        | 45   | 0.86 | 0.13 | XM_356802.1  |  |
| BC003332         | 305  | 0.86 | 0.07 | NM_030260.1  |  |
| Pdzgef1          | 196  | 0.86 | 0.02 | XM_203999.3  |  |
| Piga             | 770  | 0.86 | 0.15 | AK014488     |  |
| Fbxo38           | 1167 | 0.86 | 0.11 | NM_134136.1  |  |
| Slc8a1           | 396  | 0.86 | 0.11 | AK048160     |  |
| BC055324         | 296  | 0.86 | 0.32 |              |  |
| 5730410I19Rik    | 2767 | 0.86 | 0.05 | NM_025666.1  |  |
| 4930528A17Rik    | 43   | 0.86 | 0.22 | AK015922     |  |
| Nav1             | 1401 | 0.86 | 0.10 | NM_173437.1  |  |
| scl000057.1_28_F | 3889 | 0.86 | 0.15 |              |  |
| scl0004175.1_57  | 384  | 0.86 | 0.24 |              |  |
| Tnk1             | 345  | 0.86 | 0.17 | NM_031880.2  |  |
| Olfr419          | 47   | 0.86 | 0.16 | NM_146715.1  |  |
| Npb              | 75   | 0.86 | 0.28 | NM_153288.1  |  |
| Nt5e             | 769  | 0.86 | 0.05 | NM_011851.2  |  |
| Skd3             | 48   | 0.86 | 0.16 | AK049768     |  |
| Camsap1          | 273  | 0.86 | 0.20 | XM_129375.4  |  |
| Secisbp2         | 124  | 0.86 | 0.21 | XM_127336.2  |  |
| LOC277385        | 37   | 0.86 | 0.53 | XM_205866.2  |  |
| D630023F18Rik    | 42   | 0.86 | 0.13 | NM_175293.2  |  |
| 4632411B12Rik    | 1796 | 0.86 | 0.11 | NM_172652.1  |  |
| LOC268673        | 79   | 0.86 | 0.11 | XM_193732.2  |  |
| Ampd2            | 111  | 0.86 | 0.28 | NM_028779.3  |  |
| Gdi1             | 1884 | 0.86 | 0.03 | NM_010273.1  |  |
| 1190002A17Rik    | 51   | 0.86 | 0.48 | XM_130050.2  |  |
| 3930402G23Rik    | 75   | 0.86 | 0.27 | XM_489221    |  |
| Cbfa2t3h         | 68   | 0.86 | 0.13 | NM_009824    |  |
| Adcy5            | 170  | 0.86 | 0.17 | XM_358801.1  |  |
| Myst4            | 163  | 0.86 | 0.19 | NM_017479    |  |
| Siat7f           | 68   | 0.86 | 0.14 | NM_016973.1  |  |
| E430018P19Rik    | 275  | 0.86 | 0.08 | AK088497     |  |

|               |      |      |      |             |  |
|---------------|------|------|------|-------------|--|
| Akap1         | 301  | 0.86 | 0.01 | NM_009648   |  |
| Rap2c         | 590  | 0.86 | 0.13 | NM_172413.1 |  |
| Rap1ga1       | 1809 | 0.86 | 0.13 | XM_149500   |  |
| 1700129L13Rik | 559  | 0.86 | 0.15 | NM_026462.1 |  |
| Ctrl          | 50   | 0.86 | 0.36 | NM_023182.1 |  |
| Snx25         | 430  | 0.86 | 0.04 | XM_134171   |  |
| Laf4l         | 237  | 0.86 | 0.26 | NM_033565.1 |  |
| Zfp451        | 1807 | 0.86 | 0.01 | NM_133817.1 |  |
| Itga10        | 44   | 0.86 | 0.48 | XM_112192   |  |
| Micall2       | 168  | 0.86 | 0.13 |             |  |
| Osbpl8        | 99   | 0.86 | 0.23 | NM_175489.2 |  |
| Pak2          | 1717 | 0.86 | 0.23 | XM_358817.1 |  |
| Adprt2        | 78   | 0.86 | 0.10 | AK076193    |  |
| Ndr1          | 2966 | 0.86 | 0.12 | NM_008681   |  |
| 6030408C04Rik | 252  | 0.86 | 0.26 | XM_126912   |  |
| AA959934      | 91   | 0.86 | 0.22 | NM_153167.1 |  |
| 3930401E15Rik | 4369 | 0.86 | 0.21 | XM_128959.3 |  |
| Tpk1          | 139  | 0.86 | 0.13 | NM_013861   |  |
| 6530443I23Rik | 49   | 0.86 | 0.08 | AK032690    |  |
| BC062115      | 67   | 0.86 | 0.43 |             |  |
| Gm114         | 1249 | 0.86 | 0.11 |             |  |
| 1700010C24Rik | 53   | 0.86 | 0.11 | NM_027401.1 |  |
| Timp2         | 1272 | 0.86 | 0.06 | NM_011594.2 |  |
| A830011N18Rik | 34   | 0.86 | 0.21 | AK043603    |  |
| Usp14         | 328  | 0.86 | 0.21 | AK042356    |  |
| Myo1d         | 66   | 0.86 | 0.01 | NM_177390.2 |  |
| BC040758      | 60   | 0.86 | 0.08 |             |  |
| Gsr           | 2033 | 0.86 | 0.02 | NM_010344.3 |  |
| 2610016F04Rik | 808  | 0.86 | 0.16 | NM_025847.1 |  |
| Fancc         | 90   | 0.86 | 0.07 | NM_007985   |  |
| A930038D06Rik | 50   | 0.86 | 0.32 | AK044739    |  |
| Myst3         | 50   | 0.86 | 0.21 | XM_146248.3 |  |
| Olf1394       | 31   | 0.86 | 0.19 | NM_146276.1 |  |
| Gmcl1         | 666  | 0.86 | 0.09 |             |  |
| 2700084L06Rik | 1327 | 0.86 | 0.17 | NM_198164   |  |
| LOC381112     | 47   | 0.86 | 0.18 | XM_355030.1 |  |
| A130010J15Rik | 243  | 0.86 | 0.12 | NM_181048.2 |  |
| Homez         | 31   | 0.86 | 0.03 | NM_183174.1 |  |
| Abcc1         | 167  | 0.86 | 0.04 | NM_008576   |  |
| 4930415J21Rik | 236  | 0.86 | 0.01 | NM_177767.3 |  |
| C730046C01Rik | 145  | 0.86 | 0.13 | AK050411    |  |
| Cdh6          | 46   | 0.86 | 0.15 | NM_007666.1 |  |
| 7030409N11Rik | 424  | 0.86 | 0.24 | AK078583    |  |
| Dnmt2         | 34   | 0.86 | 0.22 | NM_010067.2 |  |
| Pitpn         | 1664 | 0.86 | 0.16 | NM_008850.1 |  |
| C030024F02Rik | 30   | 0.86 | 0.36 | AK081244    |  |
| C130021K03Rik | 141  | 0.86 | 0.15 | AK047916    |  |
| AL033314      | 848  | 0.86 | 0.07 | NM_019776   |  |
| 3830408G10Rik | 264  | 0.86 | 0.11 | XM_355676   |  |
| 1500010G04Rik | 143  | 0.86 | 0.15 | NM_173366.1 |  |
| LOC277707     | 76   | 0.86 | 0.12 | XM_204076.2 |  |
| Ndc80         | 388  | 0.86 | 0.09 |             |  |
| Ccnl          | 266  | 0.86 | 0.26 | AK051380    |  |
| Olf1161       | 34   | 0.86 | 0.34 | NM_146848.1 |  |
| Aldh3a2       | 1622 | 0.86 | 0.10 | AK078243    |  |
| Zmpste24      | 1151 | 0.86 | 0.16 | NM_172700.1 |  |
| Opa1          | 289  | 0.86 | 0.26 | NM_133752   |  |
| 7030401O21Rik | 810  | 0.86 | 0.06 | NM_198035.1 |  |
| E430023L22Rik | 289  | 0.86 | 0.27 | AK088688    |  |
| LOC245201     | 93   | 0.86 | 0.32 | XM_142753.2 |  |
| Nthl1         | 54   | 0.86 | 0.16 | NM_008743.1 |  |
| D5Ert585e     | 753  | 0.86 | 0.05 | NM_027922.1 |  |
| 4632415K11Rik | 159  | 0.86 | 0.22 | NM_028883.1 |  |
| NE            | 39   | 0.86 | 0.55 | NM_015779   |  |
| C630002L24Rik | 55   | 0.86 | 0.37 | AK049836    |  |
| Lanc12        | 529  | 0.86 | 0.35 | NM_133737   |  |
| Cldn7         | 51   | 0.86 | 0.09 | NM_016887.2 |  |
| 2900001O04Rik | 1329 | 0.86 | 0.05 | NM_026213.2 |  |

|                  |       |      |      |             |  |
|------------------|-------|------|------|-------------|--|
| Ripk2            | 65    | 0.86 | 0.28 | NM_138952.1 |  |
| Ap3m1            | 190   | 0.86 | 0.10 | NM_018829   |  |
| Lrrc4            | 54    | 0.86 | 0.29 | NM_138682.1 |  |
| 9130422G05Rik    | 352   | 0.86 | 0.16 | NM_025782   |  |
| A830004L04Rik    | 103   | 0.86 | 0.19 | AK043518    |  |
| 6530405K19       | 259   | 0.86 | 0.07 | NM_183021.1 |  |
| 2900002G04Rik    | 1737  | 0.86 | 0.13 | XM_136135.2 |  |
| LOC382137        | 40    | 0.86 | 0.44 | NM_198675.1 |  |
| Axin2            | 498   | 0.86 | 0.29 | NM_015732.3 |  |
| Sik2             | 125   | 0.86 | 0.08 | NM_178710.3 |  |
| 4933411K20Rik    | 1179  | 0.86 | 0.21 | NM_025747.2 |  |
| Scml4            | 383   | 0.86 | 0.26 | NM_172938.2 |  |
| Dusp4            | 862   | 0.86 | 0.07 | NM_176933   |  |
| LOC381554        | 42    | 0.86 | 0.28 | XM_110538.2 |  |
| Ddx52            | 1153  | 0.86 | 0.03 | NM_030096.1 |  |
| Gpr142           | 95    | 0.86 | 0.14 | NM_181749.1 |  |
| C430048L16Rik    | 62    | 0.86 | 0.24 | XM_355471.1 |  |
| 2700069A02Rik    | 1869  | 0.86 | 0.12 | AK076066    |  |
| Cetn2            | 267   | 0.86 | 0.06 | NM_019405.5 |  |
| Falz             | 248   | 0.86 | 0.27 | XM_126724.4 |  |
| Six1             | 1687  | 0.86 | 0.14 | NM_009189.1 |  |
| Rara             | 34    | 0.86 | 0.54 | NM_009024.1 |  |
| Fbxo45           | 91    | 0.86 | 0.56 | NM_173439.1 |  |
| LOC384593        | 33    | 0.86 | 0.32 | XM_357733.1 |  |
| BC028975         | 262   | 0.86 | 0.29 | NM_146254.1 |  |
| Ube2d1           | 44    | 0.86 | 0.34 | NM_145420.1 |  |
| Bcan             | 80    | 0.86 | 0.12 | NM_007529.1 |  |
| Atp5s            | 619   | 0.86 | 0.06 | NM_026536.1 |  |
| Aldh1l2          | 3438  | 0.86 | 0.09 |             |  |
| Lypla1           | 1336  | 0.86 | 0.22 | NM_008866.2 |  |
| Ing5             | 43    | 0.86 | 0.14 | NM_029340.1 |  |
| 4930566A11Rik    | 87    | 0.86 | 0.11 | BC059014    |  |
| scl0001609.1_19  | 99    | 0.86 | 0.07 |             |  |
| 2810408E11Rik    | 462   | 0.86 | 0.15 | NM_029582   |  |
| Fosb             | 923   | 0.86 | 0.22 | NM_008036   |  |
| Srgap2           | 87    | 0.86 | 0.15 | NM_080448.2 |  |
| Mtmr1            | 830   | 0.86 | 0.22 | NM_016985.1 |  |
| A530062K18Rik    | 136   | 0.86 | 0.10 | AK041022    |  |
| C730026O12Rik    | 315   | 0.86 | 0.14 | AK050208    |  |
| Atp6v1a1         | 2679  | 0.86 | 0.10 | NM_007508.2 |  |
| Hnrpf            | 823   | 0.86 | 0.06 | NM_133834   |  |
| 4930417O22Rik    | 46    | 0.86 | 0.28 | XM_488613   |  |
| E130112L06Rik    | 36    | 0.86 | 0.39 | AK053591    |  |
| Smad2            | 899   | 0.86 | 0.18 | NM_010754.2 |  |
| 9630050A07Rik    | 88    | 0.86 | 0.22 | AK036261    |  |
| HPBR114          | 85    | 0.86 | 0.21 | AK046856    |  |
| E430029P19Rik    | 43    | 0.86 | 0.26 | AK088889    |  |
| 6330503C17Rik    | 137   | 0.86 | 0.28 | XM_181410.4 |  |
| Dhx36            | 3183  | 0.86 | 0.08 | NM_028136.1 |  |
| Capza1           | 285   | 0.86 | 0.26 | NM_009797.1 |  |
| 2410042D21Rik    | 675   | 0.86 | 0.16 | NM_024254.2 |  |
| Pbef1            | 416   | 0.86 | 0.18 | NM_021524.1 |  |
| 2010015J01Rik    | 60    | 0.86 | 0.17 | AK037305    |  |
| Egln1            | 388   | 0.86 | 0.02 | NM_053207.1 |  |
| Ttll3            | 70    | 0.86 | 0.10 |             |  |
| Ggnbp1           | 100   | 0.86 | 0.12 | NM_027544   |  |
| Fubp1            | 648   | 0.86 | 0.18 | NM_057172.1 |  |
| scl000681.1_2    | 209   | 0.86 | 0.23 |             |  |
| Gpd2             | 2165  | 0.86 | 0.04 | NM_010274.2 |  |
| LOC226135        | 849   | 0.86 | 0.05 | XM_123422.2 |  |
| scl0002775.1_4   | 697   | 0.86 | 0.07 |             |  |
| scl0001869.1_367 | 5733  | 0.86 | 0.24 |             |  |
| Xpr1             | 127   | 0.86 | 0.04 | NM_011273.1 |  |
| Anapc11          | 159   | 0.86 | 0.09 | NM_025389.2 |  |
| Shkbp1           | 449   | 0.86 | 0.10 | NM_138676.1 |  |
| scl000819.1_3    | 10065 | 0.86 | 0.07 |             |  |
| Adss             | 1091  | 0.86 | 0.06 |             |  |
| LOC208684        | 120   | 0.86 | 0.24 | XM_156281.4 |  |

|                 |      |      |      |              |  |
|-----------------|------|------|------|--------------|--|
| LOC212399       | 552  | 0.86 | 0.19 | XM_137003.2  |  |
| Fusip1          | 487  | 0.86 | 0.22 | NM_010178.1  |  |
| Prkra           | 1024 | 0.86 | 0.26 |              |  |
| 2610204L23Rik   | 1856 | 0.86 | 0.11 | NM_026009.1  |  |
| Brsk2           | 62   | 0.86 | 0.10 |              |  |
| 3110047P20Rik   | 53   | 0.86 | 0.03 | XM_132047.3  |  |
| C030016K15Rik   | 80   | 0.86 | 0.09 |              |  |
| Pkd1            | 69   | 0.86 | 0.23 | NM_013630.1  |  |
| Cars            | 102  | 0.86 | 0.08 | NM_013742.2  |  |
| Sesn1           | 551  | 0.86 | 0.11 | XM_125538.4  |  |
| Ccdc46          | 123  | 0.86 | 0.15 |              |  |
| Ganc            | 157  | 0.86 | 0.11 |              |  |
| C1qdc1          | 32   | 0.86 | 0.41 | XM_132976.3  |  |
| AW210570        | 159  | 0.86 | 0.08 | NM_025296.2  |  |
| Lmbr1           | 49   | 0.86 | 0.40 | NM_020295    |  |
| B230206N24Rik   | 815  | 0.86 | 0.06 | NM_172487    |  |
| Ralgds          | 127  | 0.86 | 0.31 | NM_009058.1  |  |
| A730006E03Rik   | 32   | 0.86 | 0.35 | AK042561     |  |
| Rad17           | 442  | 0.86 | 0.06 | NM_011233.1  |  |
| Mbtps2          | 166  | 0.85 | 0.23 | NM_172307.1  |  |
| 5430405C01Rik   | 224  | 0.85 | 0.21 | XM_138000.3  |  |
| 2900055J20Rik   | 33   | 0.85 | 0.22 |              |  |
| Klk8            | 230  | 0.85 | 0.15 | NM_008457.1  |  |
| Tbc1d15         | 2824 | 0.85 | 0.12 | NM_025706.2  |  |
| D030028O16Rik   | 676  | 0.85 | 0.23 | NM_145984    |  |
| LOC385871       | 186  | 0.85 | 0.22 | XM_358979.1  |  |
| Tmem23          | 413  | 0.85 | 0.24 | NM_144792.2  |  |
| Mbip            | 82   | 0.85 | 0.22 | NM_145442.1  |  |
| Spna2           | 827  | 0.85 | 0.09 | XM_359378.1  |  |
| 4921513J16Rik   | 47   | 0.85 | 0.09 |              |  |
| Nln             | 315  | 0.85 | 0.13 | NM_029447.1  |  |
| AA415817        | 97   | 0.85 | 0.22 | NM_053181.1  |  |
| C230022N09Rik   | 35   | 0.85 | 0.29 | AK082201     |  |
| Tbpl1           | 273  | 0.85 | 0.14 | NM_011603.2  |  |
| 4932416G22Rik   | 32   | 0.85 | 0.16 | AK030034     |  |
| 6330581L23Rik   | 231  | 0.85 | 0.09 | NM_146185.1  |  |
| Birc4           | 40   | 0.85 | 0.39 | NM_009688.1  |  |
| 3110050L10Rik   | 42   | 0.85 | 0.17 | AK014201     |  |
| Peci            | 283  | 0.85 | 0.08 | NM_011868.1  |  |
| Lpin1           | 304  | 0.85 | 0.13 | NM_015763    |  |
| LOC237781       | 34   | 0.85 | 0.32 | XM_110964.2  |  |
| scl0001562.1_73 | 59   | 0.85 | 0.09 |              |  |
| Tsc1            | 57   | 0.85 | 0.14 | AK083363     |  |
| Myo6            | 1323 | 0.85 | 0.19 | NM_008662    |  |
| scl0001905.1_3  | 3867 | 0.85 | 0.24 |              |  |
| Zfp334          | 484  | 0.85 | 0.06 | NM_178411    |  |
| 1600014C10Rik   | 298  | 0.85 | 0.12 | NM_028166    |  |
| Fnbp3           | 547  | 0.85 | 0.09 | AK045207     |  |
| E130016E03Rik   | 1183 | 0.85 | 0.11 | XM_485355    |  |
| 1500001A10Rik   | 43   | 0.85 | 0.21 | AK005085     |  |
| 2310014L17Rik   | 50   | 0.85 | 0.18 | XM_355858    |  |
| Elys            | 1912 | 0.85 | 0.22 | NM_026375    |  |
| C530036F05Rik   | 290  | 0.85 | 0.08 |              |  |
| Gm592           | 413  | 0.85 | 0.15 | NM_001004364 |  |
| Cul5            | 605  | 0.85 | 0.12 | NM_027807    |  |
| scl000936.1_18  | 97   | 0.85 | 0.19 |              |  |
| 1110046J11Rik   | 1916 | 0.85 | 0.15 |              |  |
| Dncl2b          | 152  | 0.85 | 0.20 | NM_029297.1  |  |
| 1500036D03Rik   | 244  | 0.85 | 0.28 | AK005364     |  |
| AV312086        | 1163 | 0.85 | 0.06 | NM_172635.1  |  |
| 4833426H15Rik   | 485  | 0.85 | 0.08 | AK014770     |  |
| Ulk1            | 1019 | 0.85 | 0.09 | NM_009469.3  |  |
| 4933424N09Rik   | 106  | 0.85 | 0.37 | AK015831     |  |
| Syt12           | 50   | 0.85 | 0.04 | NM_031394.1  |  |
| 4933426L22Rik   | 2794 | 0.85 | 0.20 | NM_027672.1  |  |
| Srcasm          | 370  | 0.85 | 0.13 | XM_126629.2  |  |
| Nf1             | 64   | 0.85 | 0.16 | NM_010897.1  |  |
| 2700023B17Rik   | 2482 | 0.85 | 0.22 | NM_025948.1  |  |

|                  |      |      |      |             |  |
|------------------|------|------|------|-------------|--|
| AJ430384         | 655  | 0.85 | 0.13 | NM_130880.1 |  |
| Camk4            | 263  | 0.85 | 0.11 | NM_009793.1 |  |
| Fastkd2          | 83   | 0.85 | 0.07 |             |  |
| C530028O21Rik    | 31   | 0.85 | 0.74 | NM_175696.2 |  |
| Snrk             | 890  | 0.85 | 0.13 | NM_133741.1 |  |
| 4933409K03Rik    | 253  | 0.85 | 0.26 | XM_355251.1 |  |
| 8430417B06Rik    | 35   | 0.85 | 0.56 | AK033377    |  |
| Ssh3             | 131  | 0.85 | 0.07 | NM_198113.1 |  |
| LOC332300        | 142  | 0.85 | 0.18 | XM_288828.2 |  |
| Immt             | 1386 | 0.85 | 0.16 | AK037930    |  |
| LOC381159        | 58   | 0.85 | 0.09 | XM_355080.1 |  |
| 2210023G05Rik    | 42   | 0.85 | 0.31 | NM_197999.1 |  |
| Olfir702         | 44   | 0.85 | 0.20 | NM_146597.1 |  |
| LOC381524        | 56   | 0.85 | 0.19 | XM_358609.1 |  |
| Strbp            | 462  | 0.85 | 0.11 | NM_009261.1 |  |
| Dmf1             | 688  | 0.85 | 0.16 | AK030508    |  |
| Ncald            | 646  | 0.85 | 0.06 | NM_134094   |  |
| scl0004176.1_159 | 1169 | 0.85 | 0.27 |             |  |
| Prdm2            | 1734 | 0.85 | 0.05 | XM_204027.3 |  |
| 5330432H08Rik    | 34   | 0.85 | 0.34 | AK030565    |  |
| Pja2             | 1978 | 0.85 | 0.13 | NM_144859.1 |  |
| Purg             | 98   | 0.85 | 0.12 | NM_152821.1 |  |
| Rnf103           | 4138 | 0.85 | 0.16 | NM_009543.1 |  |
| Rnf23            | 31   | 0.85 | 0.11 | AK053507    |  |
| D330037H05Rik    | 507  | 0.85 | 0.16 | XM_128090   |  |
| Hr               | 854  | 0.85 | 0.18 | NM_021877.2 |  |
| C230075M21Rik    | 709  | 0.85 | 0.02 |             |  |
| Dync1i2          | 7197 | 0.85 | 0.15 |             |  |
| Casc3            | 2331 | 0.85 | 0.29 | NM_138660.1 |  |
| Nptx2            | 603  | 0.85 | 0.64 | NM_016789.2 |  |
| BC002230         | 220  | 0.85 | 0.15 | NM_183155.1 |  |
| lqwd1            | 1409 | 0.85 | 0.14 | XM_129604.2 |  |
| Ttll4            | 629  | 0.85 | 0.14 | XM_129771   |  |
| D130035M05Rik    | 112  | 0.85 | 0.19 | AK051333    |  |
| Tcerg1           | 1463 | 0.85 | 0.06 | AK082750    |  |
| Zf               | 45   | 0.85 | 0.28 | NM_145151.1 |  |
| F730031O20Rik    | 68   | 0.85 | 0.27 | XM_283813.1 |  |
| Syncrip          | 1057 | 0.85 | 0.18 | NM_019666   |  |
| BC030440         | 35   | 0.85 | 0.22 | NM_173732.2 |  |
| Pex7             | 520  | 0.85 | 0.13 | NM_008822.1 |  |
| Cuedc1           | 81   | 0.85 | 0.07 | NM_198013.1 |  |
| Gmeb2            | 289  | 0.85 | 0.10 | NM_198169.1 |  |
| Speer4d          | 49   | 0.85 | 0.26 | NM_025759   |  |
| Ndr4             | 91   | 0.85 | 0.09 | NM_145602.1 |  |
| 9530056D24Rik    | 59   | 0.85 | 0.63 |             |  |
| scl0001356.1_58  | 603  | 0.85 | 0.15 |             |  |
| Heca             | 950  | 0.85 | 0.12 |             |  |
| C1galt1          | 733  | 0.85 | 0.17 | NM_052993.2 |  |
| Cbl              | 94   | 0.85 | 0.19 | NM_007619.1 |  |
| Otud7b           | 32   | 0.85 | 0.23 |             |  |
| scl0004185.1_201 | 45   | 0.85 | 0.38 |             |  |
| Shcbp1           | 167  | 0.85 | 0.18 | NM_011369.1 |  |
| Mark1            | 247  | 0.85 | 0.23 | NM_145515   |  |
| D330001D04Rik    | 84   | 0.85 | 0.30 | AK052150    |  |
| scl0002916.1_10  | 63   | 0.85 | 0.49 |             |  |
| 2810410P22Rik    | 434  | 0.85 | 0.22 | NM_182994.1 |  |
| Traf6            | 583  | 0.85 | 0.30 | NM_009424   |  |
| Kcns1            | 37   | 0.85 | 0.09 | NM_008435.1 |  |
| Ubl3             | 2643 | 0.85 | 0.18 | NM_011908.1 |  |
| AA792892         | 45   | 0.85 | 0.11 | NM_178894   |  |
| Thrap2           | 92   | 0.85 | 0.22 | NM_172424   |  |
| Dscr6            | 34   | 0.85 | 0.33 | NM_133229.1 |  |
| Cog6             | 826  | 0.85 | 0.16 | NM_026225.1 |  |
| Fndc3b           | 1164 | 0.85 | 0.12 |             |  |
| Zfp276           | 111  | 0.85 | 0.18 | NM_020497.1 |  |
| 2610528M18Rik    | 223  | 0.85 | 0.27 | AK088680    |  |
| Nudt7            | 42   | 0.85 | 0.17 | NM_024446.2 |  |
| Chk              | 75   | 0.85 | 0.10 | AK052056    |  |

|                 |      |      |      |             |  |
|-----------------|------|------|------|-------------|--|
| Foxa2           | 77   | 0.85 | 0.30 | NM_010446.1 |  |
| Fmn12           | 1064 | 0.85 | 0.09 | BC048004    |  |
| 5830434K11Rik   | 47   | 0.85 | 0.08 | AK030864    |  |
| C530033G22Rik   | 38   | 0.85 | 0.17 | AK083014    |  |
| 1110054O05Rik   | 51   | 0.85 | 0.31 | XM_485388   |  |
| C130040J23Rik   | 116  | 0.85 | 0.07 |             |  |
| LOC386179       | 57   | 0.85 | 0.54 | XM_359105.1 |  |
| A130028J20Rik   | 197  | 0.85 | 0.22 |             |  |
| Calmbp1         | 389  | 0.85 | 0.18 | NM_009791.2 |  |
| B230343B06Rik   | 32   | 0.85 | 0.17 | AK046121    |  |
| Arrb1           | 34   | 0.85 | 0.15 | NM_178220.2 |  |
| Pdcl            | 304  | 0.85 | 0.20 | AK004704    |  |
| Sh3d1B          | 265  | 0.85 | 0.09 | NM_011365.2 |  |
| 4921524P20Rik   | 217  | 0.85 | 0.20 | NM_026641.1 |  |
| Bmi1            | 1096 | 0.85 | 0.34 | NM_007552   |  |
| 1810015C04Rik   | 3615 | 0.85 | 0.05 | NM_025459.2 |  |
| 3110012E06Rik   | 335  | 0.85 | 0.07 | AK014044    |  |
| Tgoln1          | 717  | 0.85 | 0.28 | NM_009443.2 |  |
| E130105L11Rik   | 2120 | 0.85 | 0.21 |             |  |
| 9230104M06Rik   | 44   | 0.85 | 0.17 | AK033757    |  |
| Zhx2            | 107  | 0.85 | 0.50 | NM_199449.1 |  |
| Map3k10         | 32   | 0.85 | 0.22 | XM_194344.3 |  |
| Ghitm           | 676  | 0.85 | 0.10 | NM_078478.1 |  |
| 4632409L22Rik   | 45   | 0.85 | 0.12 | NM_026046.1 |  |
| Olfir965        | 31   | 0.85 | 0.17 |             |  |
| Gprasp1         | 1152 | 0.85 | 0.09 | NM_026081.3 |  |
| 2310046K01Rik   | 103  | 0.85 | 0.27 | NM_027172.1 |  |
| Kcnj6           | 50   | 0.85 | 0.05 | AK081109    |  |
| Rngtt           | 641  | 0.85 | 0.13 | NM_011884   |  |
| Zfx             | 1121 | 0.85 | 0.08 | NM_011768   |  |
| Abhd4           | 280  | 0.85 | 0.10 | NM_134076.1 |  |
| Hspa4           | 411  | 0.85 | 0.19 | NM_008300.2 |  |
| C920004H05Rik   | 86   | 0.85 | 0.10 | AK083320    |  |
| Slc45a4         | 411  | 0.85 | 0.17 |             |  |
| 1300010F03Rik   | 80   | 0.85 | 0.16 | XM_127737.3 |  |
| Ascl1           | 2800 | 0.85 | 0.20 | NM_008553.2 |  |
| Fxyd6           | 3930 | 0.85 | 0.14 | NM_022004.5 |  |
| Nxt2            | 4660 | 0.85 | 0.22 | NM_172782.1 |  |
| Tle4            | 748  | 0.85 | 0.11 | NM_011600.2 |  |
| 1700105P06Rik   | 39   | 0.85 | 0.19 | XM_129071.2 |  |
| LOC386139       | 44   | 0.85 | 0.05 | XM_359089.1 |  |
| Klh5            | 35   | 0.85 | 0.30 | NM_175174   |  |
| Invs            | 89   | 0.85 | 0.08 | NM_010569.2 |  |
| Obfc1           | 286  | 0.85 | 0.19 | NM_175360.2 |  |
| Tpp2            | 924  | 0.85 | 0.24 | NM_009418.1 |  |
| Hpse            | 65   | 0.85 | 0.30 | NM_152803.2 |  |
| Htr7            | 39   | 0.85 | 0.06 | NM_008315.1 |  |
| FHOS2           | 44   | 0.85 | 0.14 | NM_175276.3 |  |
| Nup98           | 181  | 0.85 | 0.01 | NM_022979.1 |  |
| 2610035D17Rik   | 527  | 0.85 | 0.23 |             |  |
| Rhox3           | 38   | 0.85 | 0.19 |             |  |
| Gtf2a1          | 49   | 0.85 | 0.29 | NM_175335.1 |  |
| Usp28           | 160  | 0.85 | 0.16 | NM_175482.3 |  |
| Cog7            | 387  | 0.85 | 0.06 | XM_133861.3 |  |
| C330011F01Rik   | 130  | 0.85 | 0.19 |             |  |
| Cpd             | 185  | 0.85 | 0.23 | NM_007754.1 |  |
| Peli1           | 237  | 0.85 | 0.06 | AK020915    |  |
| Gcap14          | 608  | 0.85 | 0.10 |             |  |
| Slc27a4         | 118  | 0.85 | 0.16 | NM_011989.1 |  |
| Ranbp9          | 972  | 0.85 | 0.16 | NM_019930.1 |  |
| 2610302F08Rik   | 37   | 0.85 | 0.39 | AK011964    |  |
| B230399N07      | 85   | 0.85 | 0.26 | XM_196334.3 |  |
| Narg1           | 327  | 0.85 | 0.20 | NM_053089   |  |
| Tgoln2          | 661  | 0.85 | 0.23 | NM_009444   |  |
| D330046C14Rik   | 45   | 0.85 | 0.25 | AK084811    |  |
| Terf2           | 140  | 0.85 | 0.08 | AK042508    |  |
| scl0002182.1_22 | 66   | 0.85 | 0.31 |             |  |
| MALT-1          | 62   | 0.85 | 0.11 | AK045200    |  |

|                 |      |      |      |             |  |
|-----------------|------|------|------|-------------|--|
| C130008L17Rik   | 32   | 0.85 | 0.32 | AK047852    |  |
| Nphp3           | 38   | 0.84 | 0.26 | NM_028721   |  |
| BC023892        | 2009 | 0.84 | 0.12 | XM_135029.3 |  |
| Rabgap1         | 1054 | 0.84 | 0.14 | NM_146121.1 |  |
| LOC381170       | 32   | 0.84 | 0.14 | XM_355093.1 |  |
| Mtcp1           | 52   | 0.84 | 0.26 | NM_010839.2 |  |
| LOC327743       | 47   | 0.84 | 0.23 | XM_282903.2 |  |
| LOC381016       | 37   | 0.84 | 0.56 | XM_354922.1 |  |
| Zfp292          | 683  | 0.84 | 0.12 | XM_355564   |  |
| LOC383189       | 1734 | 0.84 | 0.12 | XM_356911.1 |  |
| 5830472M02Rik   | 299  | 0.84 | 0.23 | NM_181734.1 |  |
| Dgka            | 64   | 0.84 | 0.06 | NM_016811.2 |  |
| Coro2a          | 59   | 0.84 | 0.34 | NM_178893.2 |  |
| Gsdm1           | 671  | 0.84 | 0.02 | NM_021347.2 |  |
| BC022645        | 103  | 0.84 | 0.14 | NM_146228.2 |  |
| scl0003173.1_9  | 76   | 0.84 | 0.28 |             |  |
| Spag1           | 150  | 0.84 | 0.18 | NM_012031.1 |  |
| 1110001C23Rik   | 1363 | 0.84 | 0.23 | AK003209    |  |
| B930036M14Rik   | 144  | 0.84 | 0.09 | AK047215    |  |
| 1110033L15Rik   | 46   | 0.84 | 0.21 |             |  |
| Spc25           | 1395 | 0.84 | 0.05 |             |  |
| Cpt1c           | 202  | 0.84 | 0.14 | NM_153679   |  |
| Il16            | 32   | 0.84 | 0.32 | NM_010551.1 |  |
| D430030M24Rik   | 102  | 0.84 | 0.07 | AK085056    |  |
| scl0001550.1_29 | 193  | 0.84 | 0.21 |             |  |
| A1bg            | 38   | 0.84 | 0.02 |             |  |
| Axot            | 403  | 0.84 | 0.24 | NM_020575.1 |  |
| Myo9a           | 36   | 0.84 | 0.28 | XM_356161.1 |  |
| Ttc15           | 140  | 0.84 | 0.36 | NM_178811   |  |
| scl0003168.1_6  | 191  | 0.84 | 0.47 |             |  |
| Plscr1          | 244  | 0.84 | 0.10 | NM_011636.1 |  |
| Bcor1           | 72   | 0.84 | 0.03 | NM_178782.3 |  |
| LOC228790       | 524  | 0.84 | 0.03 | XM_149245.4 |  |
| Fem1c           | 666  | 0.84 | 0.13 | NM_175117.2 |  |
| 2810426P10Rik   | 139  | 0.84 | 0.14 | XM_148728.1 |  |
| Srpk2           | 472  | 0.84 | 0.13 | NM_009274   |  |
| Cklfsf6         | 640  | 0.84 | 0.08 | NM_026036.1 |  |
| 6230416J20Rik   | 694  | 0.84 | 0.17 | NM_173400   |  |
| Mpp6            | 1046 | 0.84 | 0.02 | NM_019939.1 |  |
| 5730410E15Rik   | 861  | 0.84 | 0.16 | NM_178765.2 |  |
| Esco1           | 340  | 0.84 | 0.41 |             |  |
| Armcx5          | 547  | 0.84 | 0.19 |             |  |
| LOC386146       | 54   | 0.84 | 0.26 | XM_359092.1 |  |
| Brd1            | 1182 | 0.84 | 0.04 | XM_128275.4 |  |
| Sca10           | 733  | 0.84 | 0.03 | NM_016843   |  |
| 5033421J10Rik   | 1962 | 0.84 | 0.18 |             |  |
| Dclre1c         | 67   | 0.84 | 0.27 | NM_146114.1 |  |
| Yme1l1          | 420  | 0.84 | 0.23 | NM_013771.2 |  |
| Rbbp2           | 149  | 0.84 | 0.08 | AK046187    |  |
| LOC228862       | 52   | 0.84 | 0.16 | XM_130649.2 |  |
| Add1            | 526  | 0.84 | 0.03 | NM_013457   |  |
| 5830426I05Rik   | 298  | 0.84 | 0.17 | NM_133762   |  |
| 6330411E07Rik   | 145  | 0.84 | 0.29 |             |  |
| LOC240672       | 161  | 0.84 | 0.13 | XM_140740.3 |  |
| Fosl1           | 40   | 0.84 | 0.27 | NM_010235.1 |  |
| Arl4c           | 808  | 0.84 | 0.04 |             |  |
| Irs4            | 398  | 0.84 | 0.21 | NM_010572.1 |  |
| Fads2           | 405  | 0.84 | 0.19 | NM_019699.1 |  |
| Usp6nl          | 456  | 0.84 | 0.09 | NM_181399.2 |  |
| D430036N24Rik   | 260  | 0.84 | 0.22 |             |  |
| Wsb1            | 1884 | 0.84 | 0.26 | NM_019653.2 |  |
| scl0003876.1_26 | 134  | 0.84 | 0.34 |             |  |
| LOC381305       | 45   | 0.84 | 0.51 | XM_355250.1 |  |
| A930021K20Rik   | 117  | 0.84 | 0.28 | AK044548    |  |
| 6030411K04Rik   | 439  | 0.84 | 0.16 | XM_486150   |  |
| 2610024E20Rik   | 1128 | 0.84 | 0.05 | NM_146084   |  |
| Wdr9            | 435  | 0.84 | 0.05 | NM_145125   |  |
| Esrrb           | 34   | 0.84 | 0.28 | NM_011934.2 |  |

|                |      |      |      |             |
|----------------|------|------|------|-------------|
| Cnga1          | 70   | 0.84 | 0.02 | NM_007723.1 |
| Vps35          | 5275 | 0.84 | 0.10 | NM_022997   |
| 4930402H24Rik  | 91   | 0.84 | 0.20 | NM_029432   |
| Rcor1          | 208  | 0.84 | 0.29 | NM_054048.1 |
| Birc1e         | 618  | 0.84 | 0.02 | NM_010870.1 |
| 2410006F04Rik  | 32   | 0.84 | 0.21 | AK019107    |
| Stam           | 159  | 0.84 | 0.26 | NM_011484.2 |
| 2600011C06Rik  | 68   | 0.84 | 0.21 | NM_027349.1 |
| 5330439J01Rik  | 401  | 0.84 | 0.18 | NM_175407   |
| Pacsin1        | 420  | 0.84 | 0.05 | NM_011861.1 |
| Irf6           | 653  | 0.84 | 0.06 | NM_016851.1 |
| LOC386186      | 44   | 0.84 | 0.06 | XM_359110.1 |
| A130072J07Rik  | 266  | 0.84 | 0.01 | AK038024    |
| scl0002275.1_1 | 118  | 0.84 | 0.19 |             |
| Jmjd2c         | 615  | 0.84 | 0.10 | NM_144787.1 |
| Klh2           | 63   | 0.84 | 0.23 | NM_178633.1 |
| 2700045K19Rik  | 3601 | 0.84 | 0.05 | AK012378    |
| 6620401M08Rik  | 34   | 0.84 | 0.36 | XM_489178   |
| 3110010F15Rik  | 88   | 0.84 | 0.16 | NM_026067.2 |
| Kif4           | 848  | 0.84 | 0.20 | NM_008446.1 |
| Scnn1g         | 62   | 0.84 | 0.36 | NM_011326.1 |
| Ranbp2         | 146  | 0.84 | 0.34 | AK051984    |
| Dnm1l          | 918  | 0.84 | 0.22 | NM_152816.1 |
| 1200008O12Rik  | 218  | 0.84 | 0.14 | NM_028760.1 |
| D030069G17Rik  | 106  | 0.84 | 0.19 | AK051094    |
| Cdc37          | 151  | 0.84 | 0.05 | NM_016742.2 |
| LOC382111      | 160  | 0.84 | 0.27 | XM_356198.1 |
| Dirc2          | 63   | 0.84 | 0.29 | NM_153550.2 |
| Olfir270       | 47   | 0.84 | 0.11 | NM_146607.1 |
| 5730466H23Rik  | 542  | 0.84 | 0.04 | NM_026576   |
| Malt1          | 54   | 0.84 | 0.15 | NM_172833.1 |
| Hist1h1c       | 1568 | 0.84 | 0.22 | NM_015786   |
| Smarca2        | 959  | 0.84 | 0.15 | NM_011416   |
| Manea          | 667  | 0.84 | 0.18 | NM_172865.2 |
| Bhlhb9         | 3668 | 0.84 | 0.03 | NM_198161.1 |
| Zbtb1          | 49   | 0.84 | 0.30 | NM_178744   |
| Ypel1          | 254  | 0.84 | 0.09 | NM_023249.2 |
| 9130423L19Rik  | 49   | 0.84 | 0.29 | NM_133906.3 |
| 9530076I17Rik  | 73   | 0.84 | 0.27 | AK035608    |
| Socs6          | 255  | 0.84 | 0.13 | NM_018821.2 |
| LOC381873      | 90   | 0.84 | 0.35 | XM_355885.1 |
| Trpc4ap        | 1532 | 0.84 | 0.07 | NM_019828.1 |
| B430210E12Rik  | 227  | 0.84 | 0.36 | AK046622    |
| Idi1           | 120  | 0.84 | 0.32 | NM_145360   |
| Cdk8           | 777  | 0.84 | 0.13 | NM_181570.1 |
| Optn           | 257  | 0.84 | 0.16 | NM_181848.3 |
| Slc38a3        | 464  | 0.84 | 0.13 | NM_023805.2 |
| A430107J06Rik  | 186  | 0.84 | 0.06 | NM_207633.1 |
| Rg9mtd2        | 905  | 0.84 | 0.09 | NM_175389.2 |
| 4732465J09Rik  | 131  | 0.84 | 0.29 | XM_356161   |
| 9030612K14Rik  | 2573 | 0.84 | 0.06 | XM_148116.1 |
| Phf16          | 91   | 0.84 | 0.12 | NM_199317.1 |
| LOC385855      | 384  | 0.84 | 0.16 | XM_358974.1 |
| Hist2h2bb      | 161  | 0.84 | 0.09 | NM_175666.1 |
| Lincr          | 157  | 0.84 | 0.19 | NM_153408.1 |
| 9530082I15Rik  | 307  | 0.84 | 0.24 | AK035657    |
| 2410015C20Rik  | 36   | 0.84 | 0.19 | XM_131053   |
| scl000548.1_6  | 30   | 0.84 | 0.30 |             |
| 6430595O10Rik  | 1225 | 0.84 | 0.16 | XM_356596   |
| Ift81          | 1653 | 0.84 | 0.13 |             |
| D030038A19Rik  | 194  | 0.84 | 0.43 | AK083512    |
| 9430091F09Rik  | 117  | 0.84 | 0.14 | AK035122    |
| EG546325       | 35   | 0.84 | 0.42 |             |
| 4732480K10Rik  | 35   | 0.84 | 0.09 | AK029003    |
| LOC385658      | 115  | 0.84 | 0.27 | XM_358860.1 |
| D230014K01Rik  | 32   | 0.84 | 0.13 | AK084254    |
| Garnl4         | 2452 | 0.84 | 0.19 |             |
| Atf6           | 113  | 0.84 | 0.26 | XM_129579   |



|                 |      |      |      |              |  |
|-----------------|------|------|------|--------------|--|
| Eif2ak3         | 204  | 0.84 | 0.08 | AK010397     |  |
| Topors          | 1709 | 0.84 | 0.16 | NM_134097.2  |  |
| 4933401P20Rik   | 33   | 0.84 | 0.15 | AK016608     |  |
| Stx7            | 3937 | 0.84 | 0.08 | NM_016797.2  |  |
| 1700113H08Rik   | 202  | 0.84 | 0.19 | XM_354556.1  |  |
| Sec23b          | 328  | 0.84 | 0.23 | NM_019787.2  |  |
| 5730420E01Rik   | 67   | 0.84 | 0.37 | AK077483     |  |
| 9930111A01Rik   | 46   | 0.84 | 0.19 | AK037084     |  |
| Ypel4           | 78   | 0.84 | 0.15 |              |  |
| Vdp             | 1777 | 0.84 | 0.16 | NM_019490.1  |  |
| Aifm3           | 39   | 0.84 | 0.10 |              |  |
| Kbtbd8          | 140  | 0.84 | 0.20 |              |  |
| E030025L21Rik   | 114  | 0.84 | 0.50 | NM_207531    |  |
| Als2cr13        | 1774 | 0.84 | 0.09 | NM_001003946 |  |
| Ctdspl2         | 405  | 0.84 | 0.31 |              |  |
| BC010304        | 2695 | 0.84 | 0.04 | XM_127326.3  |  |
| LOC383371       | 48   | 0.84 | 0.23 | XM_357015.1  |  |
| 5330430C04Rik   | 63   | 0.84 | 0.15 | NM_030077.1  |  |
| E130007O11Rik   | 48   | 0.84 | 0.30 | AK087403     |  |
| D5Erttd110e     | 178  | 0.84 | 0.27 | NM_133910.2  |  |
| Eef2k           | 65   | 0.84 | 0.18 | NM_007908.2  |  |
| scl0002623.1_73 | 39   | 0.84 | 0.30 |              |  |
| Ppp1cb          | 2231 | 0.84 | 0.22 | NM_172707.1  |  |
| Olf910          | 54   | 0.84 | 0.11 | NM_146811.1  |  |
| Pcdha6          | 117  | 0.84 | 0.17 | NM_007767.1  |  |
| Tm9sf2          | 118  | 0.84 | 0.39 | NM_080556.2  |  |
| Tigd3           | 60   | 0.84 | 0.15 | NM_198634.1  |  |
| LOC270174       | 49   | 0.84 | 0.15 | XM_194467.3  |  |
| Fyn             | 54   | 0.84 | 0.10 | NM_008054.1  |  |
| D430019H16Rik   | 243  | 0.84 | 0.16 |              |  |
| Zfp114          | 37   | 0.83 | 0.04 | XM_149897.3  |  |
| BC065397        | 35   | 0.83 | 0.28 |              |  |
| Rock1           | 797  | 0.83 | 0.23 | NM_009071.1  |  |
| 4932415G12Rik   | 339  | 0.83 | 0.11 | NM_026339.1  |  |
| Spnb2           | 248  | 0.83 | 0.16 | NM_009260.1  |  |
| D630041K24Rik   | 94   | 0.83 | 0.10 | AK085566     |  |
| Al314180        | 1310 | 0.83 | 0.39 | NM_172381    |  |
| Usp15           | 106  | 0.83 | 0.07 | NM_027604    |  |
| 1810022O10Rik   | 160  | 0.83 | 0.06 | XM_145521    |  |
| Hs1bp3          | 110  | 0.83 | 0.16 | NM_021429.1  |  |
| Snx9            | 229  | 0.83 | 0.13 | NM_025664.2  |  |
| Xpo7            | 101  | 0.83 | 0.24 | NM_023045.1  |  |
| 0610038K03Rik   | 33   | 0.83 | 0.30 | NM_026701.2  |  |
| Rapgef4         | 742  | 0.83 | 0.11 | NM_019688.1  |  |
| LOC223586       | 345  | 0.83 | 0.14 | XM_128266.4  |  |
| Cyp39a1         | 45   | 0.83 | 0.37 | NM_018887.2  |  |
| 9130415E20Rik   | 1821 | 0.83 | 0.27 | NM_175169.2  |  |
| Wwp1            | 325  | 0.83 | 0.19 | XM_130163    |  |
| LOC385825       | 1127 | 0.83 | 0.06 | XM_358960.1  |  |
| Orc3l           | 430  | 0.83 | 0.26 | NM_015824.2  |  |
| Zfp68           | 760  | 0.83 | 0.19 | NM_013844.1  |  |
| BC022765        | 349  | 0.83 | 0.26 | NM_146026.1  |  |
| B930062P21Rik   | 144  | 0.83 | 0.17 | NM_178789.2  |  |
| C130007P11Rik   | 47   | 0.83 | 0.23 | AK081342     |  |
| Col1a1          | 147  | 0.83 | 0.36 | NM_007742.2  |  |
| D330037A04Rik   | 91   | 0.83 | 0.12 | AK084734     |  |
| Hcr             | 34   | 0.83 | 0.25 | NM_146248    |  |
| 9530048I18Rik   | 74   | 0.83 | 0.08 | AK079240     |  |
| 2810409K11Rik   | 73   | 0.83 | 0.24 | XM_133164.3  |  |
| Ccdc132         | 662  | 0.83 | 0.11 |              |  |
| scl0001644.1_2  | 100  | 0.83 | 0.34 |              |  |
| Sez6l2          | 247  | 0.83 | 0.23 |              |  |
| D8Erttd531e     | 61   | 0.83 | 0.27 | NM_033560.2  |  |
| Arid5b          | 203  | 0.83 | 0.14 | NM_023598    |  |
| 1700081L11Rik   | 94   | 0.83 | 0.04 | XM_109700    |  |
| 1700013G10Rik   | 118  | 0.83 | 0.09 | XM_193728.3  |  |
| Wwp2            | 174  | 0.83 | 0.18 |              |  |
| A130032P05Rik   | 52   | 0.83 | 0.18 | AK037644     |  |

|                  |      |      |      |             |  |
|------------------|------|------|------|-------------|--|
| 9030203C11Rik    | 59   | 0.83 | 0.05 | NM_177277.2 |  |
| St5              | 1392 | 0.83 | 0.10 | NM_029811.1 |  |
| Sntb2            | 43   | 0.83 | 0.20 | NM_009229.2 |  |
| D330020F13Rik    | 54   | 0.83 | 0.25 | AK052282    |  |
| scl0003377.1_167 | 234  | 0.83 | 0.06 |             |  |
| Etv1             | 1087 | 0.83 | 0.07 | NM_007960.1 |  |
| Mttr2            | 340  | 0.83 | 0.16 | BC063050    |  |
| E430003D02Rik    | 2461 | 0.83 | 0.38 | AK088068    |  |
| 8430415N23Rik    | 1397 | 0.83 | 0.24 |             |  |
| Acly             | 6815 | 0.83 | 0.12 | NM_134037.2 |  |
| LOC381892        | 31   | 0.83 | 0.10 | XM_358673.1 |  |
| Usp24            | 743  | 0.83 | 0.09 | XM_131566.5 |  |
| 4632417K02       | 617  | 0.83 | 0.20 | NM_177583.2 |  |
| Acbd5            | 115  | 0.83 | 0.39 | NM_028793.1 |  |
| Smarcal1         | 286  | 0.83 | 0.11 | NM_018817.1 |  |
| 0610010F05Rik    | 845  | 0.83 | 0.25 | XM_203572.3 |  |
| 5830434P21Rik    | 2389 | 0.83 | 0.16 | NM_172661.2 |  |
| Rbmx             | 469  | 0.83 | 0.09 | NM_011252   |  |
| L3mbt3           | 92   | 0.83 | 0.07 | NM_172787   |  |
| 2900054C01Rik    | 119  | 0.83 | 0.14 |             |  |
| Minpp1           | 93   | 0.83 | 0.11 | NM_010799.1 |  |
| C87436           | 504  | 0.83 | 0.09 | NM_146170.2 |  |
| Ppp1cc           | 389  | 0.83 | 0.08 | NM_013636.2 |  |
| Ubt2             | 170  | 0.83 | 0.11 |             |  |
| BC031353         | 956  | 0.83 | 0.20 | NM_153584.1 |  |
| Rb1              | 119  | 0.83 | 0.41 | NM_009029.1 |  |
| LOC231241        | 241  | 0.83 | 0.08 | XM_124512.2 |  |
| 4930432O21Rik    | 386  | 0.83 | 0.23 | XM_128440   |  |
| LOC382009        | 42   | 0.83 | 0.15 | XM_356075.1 |  |
| 5730419I09Rik    | 237  | 0.83 | 0.08 | NM_029081.1 |  |
| 9530061L16Rik    | 38   | 0.83 | 0.12 | AK079256    |  |
| 9130011J04Rik    | 505  | 0.83 | 0.20 |             |  |
| LOC243617        | 43   | 0.83 | 0.14 | XM_144987.3 |  |
| Arid1a           | 1276 | 0.83 | 0.01 | NM_033566.1 |  |
| 2810453K03Rik    | 960  | 0.83 | 0.21 | NM_144517.2 |  |
| BC011468         | 357  | 0.83 | 0.15 | NM_144847.1 |  |
| Tmc4             | 653  | 0.83 | 0.09 | NM_181820   |  |
| 5730454B08Rik    | 54   | 0.83 | 0.37 | NM_144530.3 |  |
| Ddef1            | 177  | 0.83 | 0.12 | NM_010026.1 |  |
| Ankrd6           | 134  | 0.83 | 0.15 | NM_080471.2 |  |
| Slc17a5          | 290  | 0.83 | 0.09 | NM_172773.1 |  |
| 9330164J24Rik    | 46   | 0.83 | 0.18 |             |  |
| Mnab             | 238  | 0.83 | 0.22 | XM_130233.3 |  |
| LOC381180        | 79   | 0.83 | 0.33 | XM_355106.1 |  |
| IGKV6-15_Y15976  | 43   | 0.83 | 0.10 |             |  |
| AA589507         | 31   | 0.83 | 0.09 | XM_134412.3 |  |
| Dcp1a            | 219  | 0.83 | 0.14 |             |  |
| Blm              | 578  | 0.83 | 0.09 | NM_007550.2 |  |
| Zfp281           | 538  | 0.83 | 0.07 | NM_177643.2 |  |
| Tnks             | 101  | 0.83 | 0.31 | NM_175091.2 |  |
| D130011J22Rik    | 40   | 0.83 | 0.10 | AK051175    |  |
| Stk3             | 278  | 0.83 | 0.12 | NM_019635.1 |  |
| Rab11fip4        | 40   | 0.83 | 0.33 | NM_175543   |  |
| Gprc6a           | 32   | 0.83 | 0.41 | NM_153071.1 |  |
| Shprh            | 387  | 0.83 | 0.24 | NM_172937   |  |
| Neil1            | 61   | 0.83 | 0.18 | NM_028347.1 |  |
| Asb8             | 5396 | 0.83 | 0.05 | NM_030121.2 |  |
| Arrdc2           | 47   | 0.83 | 0.25 | XM_134227.3 |  |
| Acsl4            | 264  | 0.83 | 0.29 | NM_207625.1 |  |
| Mbtd1            | 206  | 0.83 | 0.25 | NM_134012   |  |
| Slc35a3          | 142  | 0.83 | 0.15 | AK082040    |  |
| 1600010D10Rik    | 75   | 0.83 | 0.19 |             |  |
| Nudt11           | 7882 | 0.83 | 0.10 | NM_021431.1 |  |
| Aatk             | 2323 | 0.83 | 0.19 | NM_007377.1 |  |
| D330038O06       | 111  | 0.83 | 0.10 | NM_177899   |  |
| LOC229274        | 122  | 0.83 | 0.25 | XM_124040.3 |  |
| Dcun1d4          | 1379 | 0.83 | 0.20 |             |  |
| Abcd3            | 939  | 0.83 | 0.14 | NM_008991.1 |  |

|                 |      |      |      |             |  |
|-----------------|------|------|------|-------------|--|
| LOC384475       | 464  | 0.83 | 0.24 | XM_132789.4 |  |
| 9130215G10Rik   | 222  | 0.83 | 0.17 |             |  |
| Ppp1r16a        | 151  | 0.83 | 0.10 | NM_033371.1 |  |
| Gk5             | 36   | 0.83 | 0.14 |             |  |
| 4933416C03Rik   | 49   | 0.83 | 0.22 |             |  |
| Siat10          | 242  | 0.83 | 0.16 | AK006263    |  |
| Nssr            | 435  | 0.83 | 0.28 | AK014345    |  |
| C80879          | 899  | 0.83 | 0.04 | NM_011931   |  |
| Arcn1           | 276  | 0.83 | 0.46 | NM_145985.2 |  |
| EG623661        | 36   | 0.83 | 0.34 |             |  |
| D830014B20Rik   | 290  | 0.83 | 0.10 | AK085821    |  |
| Ppp2r2a         | 56   | 0.83 | 0.26 | XM_127816.4 |  |
| LOC380928       | 153  | 0.83 | 0.18 | XM_354836.1 |  |
| V1re1           | 30   | 0.83 | 0.22 | NM_134190.1 |  |
| 6330417E04Rik   | 32   | 0.83 | 0.57 | AK031844    |  |
| Zfp27           | 452  | 0.83 | 0.07 | NM_011754.1 |  |
| Sv2a            | 238  | 0.83 | 0.15 | NM_022030.2 |  |
| Ppm2c           | 776  | 0.83 | 0.15 |             |  |
| E030027H19Rik   | 189  | 0.83 | 0.09 | NM_133974.1 |  |
| BC065120        | 193  | 0.83 | 0.24 | NM_183208.2 |  |
| LOC384327       | 69   | 0.83 | 0.13 | XM_357573.1 |  |
| E330001L02Rik   | 112  | 0.83 | 0.33 | AK054244    |  |
| C130035G06Rik   | 251  | 0.83 | 0.13 | XM_207385.3 |  |
| CKLF5           | 34   | 0.83 | 0.24 | AF401531    |  |
| Metap1          | 159  | 0.83 | 0.07 | NM_025633.1 |  |
| Slc25a16        | 1155 | 0.83 | 0.24 | NM_175194.2 |  |
| D330016G23Rik   | 70   | 0.83 | 0.23 | AK084573    |  |
| Krt20           | 85   | 0.83 | 0.24 | NM_023256.1 |  |
| 9330200H04Rik   | 294  | 0.83 | 0.11 | AK034497    |  |
| 2810423A18Rik   | 4137 | 0.83 | 0.10 |             |  |
| BC067068        | 242  | 0.83 | 0.18 | NM_207522.1 |  |
| Vipr2           | 50   | 0.83 | 0.43 | NM_009511.1 |  |
| Bcor            | 490  | 0.83 | 0.05 | NM_175044.1 |  |
| B230312L03Rik   | 31   | 0.83 | 0.44 | AK045826    |  |
| 3110038B19Rik   | 53   | 0.83 | 0.43 | AK014139    |  |
| Bcl9l           | 50   | 0.83 | 0.10 | NM_030256.1 |  |
| Hus1            | 487  | 0.83 | 0.15 | NM_008316.2 |  |
| B230337C21Rik   | 51   | 0.83 | 0.20 | AK046037    |  |
| Evl             | 528  | 0.83 | 0.35 | NM_007965.2 |  |
| Nr5a2           | 30   | 0.83 | 0.34 | NM_030676.1 |  |
| Ankrd13c        | 31   | 0.83 | 0.13 |             |  |
| Epm2aip1        | 453  | 0.83 | 0.14 | NM_175266.2 |  |
| Zfp61           | 44   | 0.83 | 0.31 | NM_009561.1 |  |
| scl000528.1_16  | 392  | 0.83 | 0.22 |             |  |
| Zdhhc21         | 813  | 0.83 | 0.21 | NM_026647.2 |  |
| Zfyve26         | 315  | 0.83 | 0.17 | XM_127031.3 |  |
| Sfxn3           | 32   | 0.83 | 0.14 | NM_053197.2 |  |
| 9430088N01Rik   | 193  | 0.83 | 0.09 |             |  |
| Fyco1           | 297  | 0.83 | 0.17 | NM_148925.1 |  |
| D630011D02Rik   | 34   | 0.83 | 0.24 | AK052644    |  |
| 5730533P17Rik   | 748  | 0.83 | 0.07 | XM_283206.2 |  |
| 4432411E13Rik   | 712  | 0.83 | 0.23 | XM_196130.3 |  |
| Rnf123          | 132  | 0.83 | 0.13 | NM_032543   |  |
| scl000392.1_7   | 192  | 0.83 | 0.23 |             |  |
| Wdr7            | 364  | 0.83 | 0.07 | XM_140391.3 |  |
| E430016J11Rik   | 242  | 0.83 | 0.15 |             |  |
| Oazin           | 98   | 0.83 | 0.33 | NM_018745.2 |  |
| scl000967.1_138 | 33   | 0.83 | 0.08 |             |  |
| A230072I16Rik   | 93   | 0.83 | 0.22 | NM_175004.1 |  |
| Tcf2            | 50   | 0.83 | 0.21 | NM_009330.1 |  |
| 4930562C03Rik   | 96   | 0.82 | 0.04 | XM_134612   |  |
| LOC381157       | 162  | 0.82 | 0.20 | XM_355079.1 |  |
| 1110032D12Rik   | 613  | 0.82 | 0.10 | NM_019770.1 |  |
| Stx12           | 1234 | 0.82 | 0.29 | NM_133887.2 |  |
| Pgm3            | 56   | 0.82 | 0.27 | NM_028352.2 |  |
| Tmem98          | 30   | 0.82 | 0.43 |             |  |
| Atrn            | 85   | 0.82 | 0.15 | NM_009730.1 |  |
| D430025H09Rik   | 129  | 0.82 | 0.12 | NM_145616.2 |  |

|                  |       |      |      |             |  |
|------------------|-------|------|------|-------------|--|
| Cyp2c55          | 248   | 0.82 | 0.13 | NM_028089.1 |  |
| 2410002O22Rik    | 443   | 0.82 | 0.21 | NM_025879   |  |
| D2Ert485e        | 90    | 0.82 | 0.25 | NM_212450   |  |
| 4931403E03Rik    | 59    | 0.82 | 0.23 | XM_144060.2 |  |
| BC027246         | 263   | 0.82 | 0.27 | XM_355947.1 |  |
| A130014O09Rik    | 42    | 0.82 | 0.22 | AK037401    |  |
| A730089K16Rik    | 35    | 0.82 | 0.51 | NM_177156.2 |  |
| 6720477C19Rik    | 472   | 0.82 | 0.02 |             |  |
| Abr              | 80    | 0.82 | 0.09 | NM_198018.1 |  |
| C330006M04Rik    | 36    | 0.82 | 0.05 | AK049139    |  |
| A230090H19Rik    | 106   | 0.82 | 0.12 | AK039051    |  |
| LOC244189        | 97    | 0.82 | 0.50 | XM_145876.3 |  |
| Tmem34           | 277   | 0.82 | 0.24 | NM_145599.2 |  |
| 1810038H16Rik    | 436   | 0.82 | 0.09 | NM_026193.1 |  |
| Trf              | 16484 | 0.82 | 0.12 | NM_133977.1 |  |
| LOC380954        | 96    | 0.82 | 0.08 | XM_354863.1 |  |
| 4631427C17Rik    | 409   | 0.82 | 0.21 | NM_021414.2 |  |
| Tmem56           | 2146  | 0.82 | 0.24 |             |  |
| Jam3             | 45    | 0.82 | 0.41 | NM_023277.1 |  |
| Tde2             | 6325  | 0.82 | 0.10 | NM_019760   |  |
| Wwc1             | 82    | 0.82 | 0.37 |             |  |
| scl0326621.17_96 | 90    | 0.82 | 0.14 |             |  |
| A930006D11       | 53    | 0.82 | 0.14 | NM_177790.2 |  |
| 5830433M19Rik    | 37    | 0.82 | 0.48 | NM_026368.1 |  |
| Rab39            | 67    | 0.82 | 0.35 | NM_175562.2 |  |
| Txnrd1           | 381   | 0.82 | 0.37 | NM_015762.1 |  |
| Uox              | 41    | 0.82 | 0.28 | NM_009474.3 |  |
| Txndc1           | 325   | 0.82 | 0.05 | NM_028339.1 |  |
| Rapgef6          | 195   | 0.82 | 0.07 | XM_484024   |  |
| AU019823         | 346   | 0.82 | 0.11 |             |  |
| E130203M01       | 46    | 0.82 | 0.25 | XM_136183.3 |  |
| Rtp1             | 2366  | 0.82 | 0.12 |             |  |
| LOC380958        | 81    | 0.82 | 0.15 | XM_354868.1 |  |
| Papola           | 735   | 0.82 | 0.19 | NM_011112   |  |
| D130027H15Rik    | 32    | 0.82 | 0.06 | AK083864    |  |
| A130033H05Rik    | 56    | 0.82 | 0.05 | AK037652    |  |
| Map3k2           | 42    | 0.82 | 0.37 | NM_011946.1 |  |
| 4921517J08Rik    | 46    | 0.82 | 0.17 | AK014910    |  |
| Xpo4             | 131   | 0.82 | 0.26 | NM_020506.1 |  |
| Dnajc6           | 4480  | 0.82 | 0.15 | NM_198412   |  |
| Myt1             | 2535  | 0.82 | 0.09 | NM_008665.2 |  |
| Slc23a3          | 390   | 0.82 | 0.29 | NM_194333.2 |  |
| Ythdf3           | 413   | 0.82 | 0.23 | NM_172677.2 |  |
| LOC381151        | 182   | 0.82 | 0.19 | XM_355074.1 |  |
| 2810013E07Rik    | 93    | 0.82 | 0.33 | NM_178112   |  |
| BC023754         | 299   | 0.82 | 0.08 | XM_148895   |  |
| C130057N11Rik    | 154   | 0.82 | 0.13 |             |  |
| 4930515K21Rik    | 99    | 0.82 | 0.15 | AK015797    |  |
| Gas2l3           | 563   | 0.82 | 0.19 | XM_137276   |  |
| 9830004G04Rik    | 45    | 0.82 | 0.20 | AK036390    |  |
| D630014A15Rik    | 800   | 0.82 | 0.06 |             |  |
| Nfasc            | 76    | 0.82 | 0.06 | NM_182716.2 |  |
| Gpr137b          | 126   | 0.82 | 0.04 |             |  |
| 4933406P04Rik    | 74    | 0.82 | 0.13 |             |  |
| Lgi1             | 1205  | 0.82 | 0.06 | NM_020278.2 |  |
| BC025458         | 39    | 0.82 | 0.07 | XM_131867.4 |  |
| 2210404D11Rik    | 517   | 0.82 | 0.08 | NM_178397.2 |  |
| Pde7a            | 134   | 0.82 | 0.13 | NM_008802   |  |
| LOC230891        | 32    | 0.82 | 0.25 | XM_144114.2 |  |
| Atp8b2           | 81    | 0.82 | 0.15 | XM_283873.2 |  |
| Arid1b           | 36    | 0.82 | 0.15 | XM_139711   |  |
| Phip             | 44    | 0.82 | 0.17 | XM_358384   |  |
| 5730550L01Rik    | 53    | 0.82 | 0.25 | AK017827    |  |
| Grb14            | 52    | 0.82 | 0.19 | NM_016719.1 |  |
| Ccne2            | 3879  | 0.82 | 0.35 | NM_009830.1 |  |
| LOC380616        | 371   | 0.82 | 0.16 | XM_358355.1 |  |
| E330018D03Rik    | 545   | 0.82 | 0.21 | NM_177133.1 |  |
| Stk33            | 84    | 0.82 | 0.07 | XM_358897   |  |

|                  |      |      |      |              |  |
|------------------|------|------|------|--------------|--|
| 9430088F20       | 122  | 0.82 | 0.11 | XM_131741.3  |  |
| D630024O11Rik    | 50   | 0.82 | 0.31 | AK085436     |  |
| Gtdc1            | 225  | 0.82 | 0.03 |              |  |
| Dsg2             | 709  | 0.82 | 0.04 | NM_007883    |  |
| D430007J11Rik    | 118  | 0.82 | 0.22 | AK084902     |  |
| Eif3s1           | 62   | 0.82 | 0.18 | NM_144545    |  |
| Aldr16           | 65   | 0.82 | 0.34 | NM_019977.2  |  |
| A930002I21Rik    | 36   | 0.82 | 0.31 | NM_175410.3  |  |
| Ash1l            | 71   | 0.82 | 0.25 | NM_138679.2  |  |
| Nono             | 106  | 0.82 | 0.32 | NM_023144    |  |
| 6.33051E+19      | 176  | 0.82 | 0.17 |              |  |
| Nat2             | 81   | 0.82 | 0.12 | NM_010874    |  |
| Kns2             | 1568 | 0.82 | 0.08 | NM_008450    |  |
| Adamts2          | 466  | 0.82 | 0.03 | NM_175643.1  |  |
| Rmnd5b           | 73   | 0.82 | 0.18 |              |  |
| Erbp2ip          | 210  | 0.82 | 0.29 | XM_358312.1  |  |
| 4631402N15Rik    | 31   | 0.82 | 0.21 | NM_173782.2  |  |
| Asgr1            | 1642 | 0.82 | 0.20 | NM_009714.1  |  |
| B130008E12Rik    | 30   | 0.82 | 0.35 | XM_137316.4  |  |
| Ikkg             | 513  | 0.82 | 0.14 | NM_010547    |  |
| Ube2d3           | 609  | 0.82 | 0.21 | NM_025356    |  |
| Atbf1            | 928  | 0.82 | 0.06 | NM_007496.1  |  |
| 1300003K24Rik    | 699  | 0.82 | 0.23 | NM_027900.2  |  |
| LOC226548        | 34   | 0.82 | 0.10 | XM_129583.1  |  |
| Gabrb3           | 1889 | 0.82 | 0.04 | NM_008071    |  |
| B230215E14Rik    | 30   | 0.82 | 0.31 | AK045609     |  |
| Mcm6             | 4469 | 0.82 | 0.20 | NM_008567.1  |  |
| 4933403O12Rik    | 31   | 0.82 | 0.13 | AK016645     |  |
| 1300007O09Rik    | 342  | 0.82 | 0.15 | XM_125817    |  |
| Arp3b            | 73   | 0.82 | 0.26 | NM_001004365 |  |
| LOC243428        | 35   | 0.82 | 0.27 | XM_144778.1  |  |
| Al481500         | 499  | 0.82 | 0.26 | NM_133901.1  |  |
| Sgol2            | 2642 | 0.82 | 0.17 | XM_355200.1  |  |
| Pdzk6            | 107  | 0.82 | 0.19 | NM_175515    |  |
| LOC381678        | 249  | 0.82 | 0.26 | XM_355653.1  |  |
| Zfp71-rs1        | 42   | 0.82 | 0.24 | NM_145622.1  |  |
| BC065123         | 1397 | 0.82 | 0.24 | NM_172576.1  |  |
| Hspa5            | 350  | 0.82 | 0.18 | NM_022310.2  |  |
| Arl6ip2          | 563  | 0.82 | 0.18 | NM_178050.2  |  |
| D630026G14Rik    | 41   | 0.82 | 0.27 | AK052698     |  |
| 1110037N09Rik    | 297  | 0.82 | 0.14 | XM_127279.4  |  |
| Wdr41            | 42   | 0.82 | 0.22 | NM_172590.1  |  |
| D9Wsu20e         | 1017 | 0.82 | 0.12 | NM_133718    |  |
| Npdc1            | 125  | 0.82 | 0.18 | NM_008721.2  |  |
| 1810060J02Rik    | 502  | 0.82 | 0.05 | NM_025911.1  |  |
| Col2a1           | 56   | 0.82 | 0.08 | NM_031163    |  |
| Magee1           | 3288 | 0.82 | 0.11 | NM_053201.2  |  |
| E430026C09Rik    | 3245 | 0.82 | 0.19 | AK088798     |  |
| C630044O20Rik    | 179  | 0.82 | 0.06 | AK049999     |  |
| LOC382864        | 69   | 0.82 | 0.29 | XM_356716.1  |  |
| Olf112           | 51   | 0.82 | 0.22 |              |  |
| scl00238693.1_37 | 88   | 0.82 | 0.26 |              |  |
| Aldh8a1          | 214  | 0.82 | 0.10 | NM_178713.3  |  |
| 6330516O17Rik    | 377  | 0.82 | 0.22 | NM_029531.1  |  |
| D330013L20Rik    | 80   | 0.82 | 0.25 | NM_199300.1  |  |
| Pcyt1b           | 266  | 0.82 | 0.10 | NM_211138.1  |  |
| Polr3f           | 52   | 0.82 | 0.26 | NM_027417.1  |  |
| BC004636         | 192  | 0.82 | 0.17 | NM_145524.1  |  |
| 2810427I04Rik    | 55   | 0.82 | 0.16 | NM_028146.1  |  |
| 2810431I02Rik    | 354  | 0.82 | 0.01 |              |  |
| LOC208414        | 256  | 0.82 | 0.31 | XM_141606.4  |  |
| B130017M24Rik    | 96   | 0.82 | 0.20 | AK044984     |  |
| scl0002056.1_30  | 49   | 0.82 | 0.33 |              |  |
| Prkag2           | 162  | 0.82 | 0.13 |              |  |
| A230103N10Rik    | 2131 | 0.82 | 0.21 | XM_203423.3  |  |
| Gm1322           | 39   | 0.82 | 0.21 |              |  |
| 1500005P14Rik    | 37   | 0.82 | 0.17 | XM_133283.4  |  |
| LOC192758        | 95   | 0.82 | 0.17 | XM_109622.2  |  |

|               |      |      |      |             |  |
|---------------|------|------|------|-------------|--|
| AA407270      | 268  | 0.82 | 0.07 |             |  |
| Pecr          | 105  | 0.82 | 0.14 | NM_023523.3 |  |
| Eef2          | 4167 | 0.82 | 0.17 | NM_007907.1 |  |
| D9Erttd280e   | 1387 | 0.82 | 0.21 | NM_177775.2 |  |
| 0710008K06Rik | 67   | 0.82 | 0.09 | AK003047    |  |
| Prdm6         | 68   | 0.82 | 0.44 |             |  |
| 1190008K20Rik | 42   | 0.82 | 0.23 | AK028012    |  |
| Oxt           | 61   | 0.82 | 0.12 | NM_011025.2 |  |
| Yars          | 155  | 0.82 | 0.24 | NM_134151.2 |  |
| 2700038I16Rik | 622  | 0.82 | 0.27 | BC061032    |  |
| A430106J12Rik | 247  | 0.82 | 0.26 | NM_176841.2 |  |
| 2610301N02Rik | 155  | 0.82 | 0.28 |             |  |
| Phf12         | 178  | 0.82 | 0.16 | NM_174852.2 |  |
| Cct5          | 198  | 0.82 | 0.05 | NM_007637.1 |  |
| 2410152H17Rik | 34   | 0.82 | 0.25 | AK010813    |  |
| Tyk2          | 155  | 0.82 | 0.02 | NM_018793.1 |  |
| BC036961      | 46   | 0.82 | 0.31 | XM_357399.1 |  |
| C430014K22Rik | 152  | 0.82 | 0.27 | AK049456    |  |
| Al836003      | 82   | 0.82 | 0.19 | NM_177716.1 |  |
| Lipn          | 367  | 0.82 | 0.08 |             |  |
| LOC382262     | 115  | 0.82 | 0.26 | XM_358723.1 |  |
| Atr           | 1180 | 0.82 | 0.32 | XM_356175.1 |  |
| Zmynd11       | 481  | 0.82 | 0.04 | NM_144516   |  |
| Foxa1         | 3553 | 0.82 | 0.11 | NM_008259.1 |  |
| Osbpl9        | 4673 | 0.82 | 0.10 | NM_133885.1 |  |
| B430007K19Rik | 86   | 0.82 | 0.15 |             |  |
| B930062M22Rik | 166  | 0.82 | 0.13 | AK047435    |  |
| Kif1c         | 37   | 0.81 | 0.28 | AK029250    |  |
| Olf952        | 34   | 0.81 | 0.34 | NM_146503.1 |  |
| LOC383850     | 46   | 0.81 | 0.30 | XM_357292.1 |  |
| Ube3a         | 120  | 0.81 | 0.17 | NM_173010.1 |  |
| Rab6ip1       | 798  | 0.81 | 0.07 | NM_021494.1 |  |
| Zfp647        | 49   | 0.81 | 0.15 | NM_172817.1 |  |
| Sgol1         | 159  | 0.81 | 0.08 | NM_028232.1 |  |
| Chd5          | 211  | 0.81 | 0.05 | XM_196334   |  |
| C330005L02Rik | 760  | 0.81 | 0.23 | NM_138756.2 |  |
| Map3k7        | 222  | 0.81 | 0.12 | BC006665    |  |
| 1700020D05Rik | 31   | 0.81 | 0.31 | NM_023781.3 |  |
| Ak3           | 691  | 0.81 | 0.03 |             |  |
| Edg5          | 35   | 0.81 | 0.14 | NM_010333   |  |
| Cxxc6         | 140  | 0.81 | 0.29 | XM_125673.2 |  |
| Polq          | 71   | 0.81 | 0.15 | NM_029977.1 |  |
| Wdr60         | 117  | 0.81 | 0.27 |             |  |
| Rasa4         | 59   | 0.81 | 0.06 | XM_355650   |  |
| 4930578F03Rik | 208  | 0.81 | 0.13 | XM_485055   |  |
| Al661438      | 180  | 0.81 | 0.08 | NM_178914.3 |  |
| Inpp1         | 3483 | 0.81 | 0.22 | NM_010567.1 |  |
| Spg20         | 181  | 0.81 | 0.26 | NM_144895   |  |
| Gm440         | 728  | 0.81 | 0.06 | NM_198620.1 |  |
| 2610024H22Rik | 4394 | 0.81 | 0.13 |             |  |
| Zfp142        | 66   | 0.81 | 0.02 | XM_484882   |  |
| B230312A22Rik | 222  | 0.81 | 0.17 | NM_172691.1 |  |
| LOC381941     | 37   | 0.81 | 0.35 | XM_355965.1 |  |
| 2410018I08Rik | 188  | 0.81 | 0.27 | NM_177561.2 |  |
| Sh3gl2        | 456  | 0.81 | 0.17 | NM_019535.2 |  |
| Gbp1          | 1750 | 0.81 | 0.16 |             |  |
| Taf5          | 218  | 0.81 | 0.15 | NM_177342.2 |  |
| 2900024P20Rik | 109  | 0.81 | 0.02 | XM_484214   |  |
| St3gal4       | 37   | 0.81 | 0.49 |             |  |
| 4932408F19Rik | 398  | 0.81 | 0.05 | NM_207225.1 |  |
| Odf2          | 63   | 0.81 | 0.13 | BC057001    |  |
| BC004701      | 161  | 0.81 | 0.13 | NM_146235   |  |
| Tcf12         | 257  | 0.81 | 0.21 | AK078415    |  |
| Eya1          | 634  | 0.81 | 0.23 | NM_010164   |  |
| Ptk9          | 163  | 0.81 | 0.13 | NM_008971.2 |  |
| AW494914      | 163  | 0.81 | 0.12 | NM_198942.1 |  |
| 5330417K06Rik | 87   | 0.81 | 0.07 | NM_172457.1 |  |
| LOC235497     | 85   | 0.81 | 0.14 | XM_134917.5 |  |

|               |      |      |      |             |  |
|---------------|------|------|------|-------------|--|
| 4921537D05Rik | 1799 | 0.81 | 0.19 | NM_029852.1 |  |
| Slc12a6       | 326  | 0.81 | 0.06 | NM_133648   |  |
| Syap1         | 2259 | 0.81 | 0.02 | NM_025932.1 |  |
| 2410004B18Rik | 80   | 0.81 | 0.08 | NM_025555.1 |  |
| LOC385461     | 426  | 0.81 | 0.06 | XM_358241.1 |  |
| Hoxd8         | 1427 | 0.81 | 0.15 | XM_355338.1 |  |
| Pcdhb12       | 100  | 0.81 | 0.11 | NM_053137.1 |  |
| Acadsb        | 930  | 0.81 | 0.21 | NM_025826   |  |
| Pi4k2b        | 350  | 0.81 | 0.04 | NM_025951.1 |  |
| H2-DMa        | 33   | 0.81 | 0.23 | NM_010386   |  |
| Lrpprc        | 671  | 0.81 | 0.27 | NM_028233.1 |  |
| Hmgcs1        | 4453 | 0.81 | 0.42 | NM_145942.2 |  |
| 4932442K20Rik | 582  | 0.81 | 0.05 | NM_178854.2 |  |
| Alms1         | 361  | 0.81 | 0.16 | XM_358366.1 |  |
| 2210418G03Rik | 42   | 0.81 | 0.10 | XM_355173.1 |  |
| AW456874      | 450  | 0.81 | 0.12 | NM_207232.1 |  |
| LOC209281     | 209  | 0.81 | 0.27 | XM_140715.2 |  |
| C330042K07Rik | 232  | 0.81 | 0.18 | AK082850    |  |
| Zfp101        | 259  | 0.81 | 0.12 | NM_009542.1 |  |
| A430085C19    | 34   | 0.81 | 0.49 | NM_177830.2 |  |
| E030003O11Rik | 82   | 0.81 | 0.01 | AK086837    |  |
| LOC231151     | 54   | 0.81 | 0.02 | XM_132031.3 |  |
| Mcf2l         | 453  | 0.81 | 0.01 | AK082849    |  |
| Slc38a2       | 1606 | 0.81 | 0.08 | NM_175121.3 |  |
| Al467484      | 247  | 0.81 | 0.09 | NM_178883.3 |  |
| Nfat5         | 448  | 0.81 | 0.11 | NM_133957.2 |  |
| Rs1h          | 36   | 0.81 | 0.20 | NM_011302.3 |  |
| B830007D08Rik | 276  | 0.81 | 0.20 | XM_150222.1 |  |
| D330034M21Rik | 50   | 0.81 | 0.24 | AK084708    |  |
| D1Erttd251e   | 762  | 0.81 | 0.11 | NM_030245.2 |  |
| Syt9          | 328  | 0.81 | 0.13 | NM_021889.2 |  |
| C130033B18Rik | 4507 | 0.81 | 0.30 | AK048072    |  |
| BC050811      | 64   | 0.81 | 0.23 | NM_178418.2 |  |
| Dnmbp         | 46   | 0.81 | 0.22 | NM_028029.1 |  |
| Bpgm          | 40   | 0.81 | 0.11 | AK037239    |  |
| 4732426B21Rik | 88   | 0.81 | 0.05 | AK028648    |  |
| Dld           | 242  | 0.81 | 0.17 | AK014092    |  |
| Gna12         | 579  | 0.81 | 0.22 | NM_010302.1 |  |
| B430109P06Rik | 111  | 0.81 | 0.25 | AK046584    |  |
| Chfr          | 910  | 0.81 | 0.16 | NM_172717.1 |  |
| 5330417C22Rik | 229  | 0.81 | 0.16 | XM_203978.3 |  |
| A230042K10Rik | 51   | 0.81 | 0.32 | NM_177622.2 |  |
| Nab1          | 937  | 0.81 | 0.06 | NM_008667.2 |  |
| Rbm14         | 66   | 0.81 | 0.26 | NM_019869.1 |  |
| Ddx10         | 115  | 0.81 | 0.16 | AK045032    |  |
| Papd4         | 527  | 0.81 | 0.07 | NM_133905.1 |  |
| D330017J20Rik | 36   | 0.81 | 0.32 | NM_177204   |  |
| Slc20a1       | 72   | 0.81 | 0.06 | AK084159    |  |
| 4933408N02Rik | 125  | 0.81 | 0.16 | NM_144533.1 |  |
| D930036F22Rik | 234  | 0.81 | 0.31 | NM_177171.3 |  |
| 4732486I23Rik | 530  | 0.81 | 0.17 | XM_130565.3 |  |
| Al450757      | 72   | 0.81 | 0.29 | NM_172592.1 |  |
| Mbnl2         | 2713 | 0.81 | 0.21 | NM_207515.1 |  |
| Efhc1         | 70   | 0.81 | 0.14 | XM_129694.3 |  |
| Ahcy1         | 2036 | 0.81 | 0.13 | NM_145542   |  |
| Arrdc3        | 358  | 0.81 | 0.22 | NM_178917.2 |  |
| C630016B22Rik | 52   | 0.81 | 0.09 | NM_172051   |  |
| Ocln          | 146  | 0.81 | 0.10 | NM_008756.2 |  |
| Col4a3bp      | 169  | 0.81 | 0.13 | AK012989    |  |
| 3010031K01Rik | 65   | 0.81 | 0.16 |             |  |
| EG633640      | 140  | 0.81 | 0.09 |             |  |
| Gsn           | 41   | 0.81 | 0.23 | BC060377    |  |
| Asf1a         | 93   | 0.81 | 0.09 | NM_025541.2 |  |
| Ap2b1         | 342  | 0.81 | 0.05 | NM_027915.1 |  |
| 1810074P20Rik | 486  | 0.81 | 0.18 | NM_026194.2 |  |
| Espl1         | 129  | 0.81 | 0.05 |             |  |
| Psip1         | 3264 | 0.81 | 0.06 | NM_133948.2 |  |
| Zfp184        | 50   | 0.81 | 0.46 | NM_183014.1 |  |

|                 |      |      |      |              |  |
|-----------------|------|------|------|--------------|--|
| LOC240669       | 35   | 0.81 | 0.24 | XM_140729.3  |  |
| Zfp1            | 36   | 0.81 | 0.59 | NM_011742.1  |  |
| Cth             | 221  | 0.81 | 0.16 | NM_145953.2  |  |
| Col1a2          | 33   | 0.81 | 0.28 | NM_007743.1  |  |
| F730005M08Rik   | 107  | 0.81 | 0.32 | AK089324     |  |
| 6430514E13Rik   | 152  | 0.81 | 0.16 | AK078215     |  |
| Sdccag33        | 2463 | 0.81 | 0.12 | XM_129060.3  |  |
| 4930523M17Rik   | 31   | 0.81 | 0.38 | AK019693     |  |
| 2700007P21Rik   | 369  | 0.81 | 0.09 | AK012215     |  |
| Zfp473          | 145  | 0.81 | 0.11 |              |  |
| Eil3            | 54   | 0.81 | 0.08 | NM_145973    |  |
| Zfp37           | 247  | 0.81 | 0.24 | NM_009554.1  |  |
| Phka1           | 153  | 0.81 | 0.21 | NM_173021.1  |  |
| EG620592        | 44   | 0.81 | 0.27 |              |  |
| Baz2a           | 75   | 0.81 | 0.14 | BC038012     |  |
| LOC384770       | 39   | 0.81 | 0.33 | XM_357856.1  |  |
| B930008K04Rik   | 337  | 0.81 | 0.10 | NM_175446.2  |  |
| D630001M17Rik   | 30   | 0.81 | 0.17 | XM_155643.2  |  |
| 39701           | 116  | 0.81 | 0.09 |              |  |
| Zfp583          | 30   | 0.81 | 0.09 |              |  |
| Cltc            | 221  | 0.81 | 0.08 | NM_001003908 |  |
| Phactr2         | 100  | 0.81 | 0.10 | XM_125520.4  |  |
| Ankfy1          | 582  | 0.81 | 0.07 | NM_009671.2  |  |
| Mms19l          | 40   | 0.81 | 0.07 | AK087633     |  |
| Slc7a1          | 82   | 0.81 | 0.06 | NM_007513.1  |  |
| scl0003901.1_33 | 53   | 0.81 | 0.35 |              |  |
| 2310032M22Rik   | 538  | 0.81 | 0.17 | AK009582     |  |
| 2900046C06Rik   | 587  | 0.81 | 0.12 |              |  |
| LOC333818       | 39   | 0.81 | 0.43 | XM_289916.2  |  |
| A930035J23Rik   | 61   | 0.81 | 0.18 |              |  |
| A630002D19Rik   | 41   | 0.81 | 0.21 | AK041330     |  |
| Kremen          | 55   | 0.81 | 0.26 | NM_032396    |  |
| BC023829        | 397  | 0.81 | 0.08 | XM_135913.3  |  |
| Pcdhb19         | 58   | 0.81 | 0.34 | NM_053144.1  |  |
| MGC60742        | 171  | 0.81 | 0.44 | XM_138691.2  |  |
| LOC216501       | 166  | 0.81 | 0.04 | XM_125931.1  |  |
| 4732423C17Rik   | 89   | 0.81 | 0.31 | AK028643     |  |
| Fasn            | 36   | 0.81 | 0.16 | NM_007988.1  |  |
| 2410017P07Rik   | 566  | 0.81 | 0.10 | NM_026643.2  |  |
| LOC434881       | 44   | 0.81 | 0.26 |              |  |
| F730047E07Rik   | 277  | 0.81 | 0.13 | NM_199467.1  |  |
| Rnf128          | 98   | 0.81 | 0.15 | NM_023270.3  |  |
| Ptpn12          | 323  | 0.81 | 0.23 | NM_011203.2  |  |
| Hace1           | 850  | 0.81 | 0.20 | NM_172473.1  |  |
| Tollip          | 2257 | 0.81 | 0.05 | NM_023764.2  |  |
| F830009M01Rik   | 304  | 0.80 | 0.03 | AK089706     |  |
| 2810411E12Rik   | 142  | 0.80 | 0.02 |              |  |
| LOC385255       | 598  | 0.80 | 0.04 | XM_358152.1  |  |
| Dnajb9          | 914  | 0.80 | 0.07 | NM_013760    |  |
| Unc5b           | 139  | 0.80 | 0.27 | NM_029770.1  |  |
| Eprs            | 1220 | 0.80 | 0.11 | XM_129647.3  |  |
| 4432416O06Rik   | 948  | 0.80 | 0.05 | AK014500     |  |
| Gria2           | 815  | 0.80 | 0.18 | NM_013540    |  |
| LOC215538       | 45   | 0.80 | 0.10 | XM_147139.2  |  |
| Gprc5b          | 51   | 0.80 | 0.15 | NM_022420.1  |  |
| Plxnd1          | 237  | 0.80 | 0.05 | XM_149784.3  |  |
| 5530400P07Rik   | 2268 | 0.80 | 0.05 | AK030698     |  |
| A630064D23Rik   | 42   | 0.80 | 0.09 | AK080353     |  |
| LOC211660       | 1191 | 0.80 | 0.23 | XM_129366.4  |  |
| Wwp1-pending    | 261  | 0.80 | 0.10 | XM_130163.3  |  |
| 2900011L18Rik   | 42   | 0.80 | 0.12 |              |  |
| Qrich1          | 77   | 0.80 | 0.04 |              |  |
| Ddc             | 2638 | 0.80 | 0.04 | NM_016672.1  |  |
| 1600002H07Rik   | 81   | 0.80 | 0.08 | XM_128548.3  |  |
| Dph3            | 71   | 0.80 | 0.09 |              |  |
| Fancg           | 38   | 0.80 | 0.51 | NM_053081.1  |  |
| Mtap7           | 1016 | 0.80 | 0.10 | AK008182     |  |
| 6030443O07Rik   | 2139 | 0.80 | 0.18 | NM_172638.1  |  |



|                |      |      |      |             |  |
|----------------|------|------|------|-------------|--|
| 1110037F02Rik  | 553  | 0.80 | 0.17 | XM_283937.2 |  |
| 4632408A20Rik  | 140  | 0.80 | 0.09 | XM_126946.2 |  |
| Rnf3           | 467  | 0.80 | 0.14 | NM_172716   |  |
| 9430034D17Rik  | 471  | 0.80 | 0.08 | NM_029891.1 |  |
| Brip1          | 245  | 0.80 | 0.10 | NM_178309.1 |  |
| Pbx1           | 36   | 0.80 | 0.24 | NM_183355.1 |  |
| 4733401H18Rik  | 39   | 0.80 | 0.52 | NM_023247   |  |
| 1700003M02Rik  | 139  | 0.80 | 0.19 | NM_027041.1 |  |
| Zfp551         | 91   | 0.80 | 0.06 |             |  |
| 4631424J17Rik  | 34   | 0.80 | 0.55 | XM_282969   |  |
| Wdhd1          | 834  | 0.80 | 0.22 | NM_172598.2 |  |
| Nos1           | 63   | 0.80 | 0.18 | NM_008712   |  |
| AA968343       | 220  | 0.80 | 0.15 | XM_130205.4 |  |
| Rora           | 333  | 0.80 | 0.04 | NM_013646.1 |  |
| Cntn6          | 32   | 0.80 | 0.22 | NM_017383.2 |  |
| Prpf38b        | 276  | 0.80 | 0.35 |             |  |
| BC048403       | 37   | 0.80 | 0.30 | NM_173022.2 |  |
| 4732496O19Rik  | 41   | 0.80 | 0.29 | NM_133853.1 |  |
| BC016423       | 197  | 0.80 | 0.17 | NM_134063.2 |  |
| 9630007J19Rik  | 891  | 0.80 | 0.02 |             |  |
| 2810004A10Rik  | 41   | 0.80 | 0.38 | NM_027265.1 |  |
| Fbxo11         | 1164 | 0.80 | 0.22 | XM_110248.4 |  |
| Ampd3          | 373  | 0.80 | 0.23 | NM_009667   |  |
| Ppig           | 124  | 0.80 | 0.12 | XM_130275   |  |
| Lphn1          | 315  | 0.80 | 0.09 | XM_134383.4 |  |
| Mphosph1       | 626  | 0.80 | 0.27 | XM_193936.2 |  |
| Fzd6           | 88   | 0.80 | 0.13 | NM_008056   |  |
| Nupl1          | 509  | 0.80 | 0.22 | NM_170591.1 |  |
| Zcchc2         | 94   | 0.80 | 0.26 | XM_129972.3 |  |
| LOC238136      | 62   | 0.80 | 0.27 | XM_138060.2 |  |
| Cyp51          | 1952 | 0.80 | 0.18 | NM_020010.1 |  |
| Ssb            | 36   | 0.80 | 0.25 | AK088370    |  |
| Slc35f5        | 73   | 0.80 | 0.22 | NM_028787.2 |  |
| Ankrd50        | 469  | 0.80 | 0.09 |             |  |
| 2310081J21Rik  | 97   | 0.80 | 0.34 | XM_287973   |  |
| Gm962          | 41   | 0.80 | 0.19 |             |  |
| A330043L12     | 96   | 0.80 | 0.04 | XM_136178.3 |  |
| Cryz           | 71   | 0.80 | 0.20 | NM_009968.1 |  |
| Arntl2         | 37   | 0.80 | 0.60 | NM_172309.1 |  |
| Rufy2          | 91   | 0.80 | 0.18 | NM_027425.2 |  |
| 1810009A16Rik  | 237  | 0.80 | 0.05 | XM_355528.1 |  |
| Kif2a          | 378  | 0.80 | 0.19 | NM_008442.1 |  |
| LOC381036      | 35   | 0.80 | 0.08 | XM_354948.1 |  |
| 2900054P12Rik  | 70   | 0.80 | 0.10 | NM_028407   |  |
| 3110031B13Rik  | 63   | 0.80 | 0.10 | NM_026075.1 |  |
| Mtap4          | 44   | 0.80 | 0.17 | AK044593    |  |
| Clasp2         | 66   | 0.80 | 0.29 | XM_135174   |  |
| 3830432E14Rik  | 207  | 0.80 | 0.41 | AK028396    |  |
| Tulip1-pending | 83   | 0.80 | 0.34 | AK083518    |  |
| Rai1           | 172  | 0.80 | 0.16 | NM_009021.1 |  |
| Adal           | 41   | 0.80 | 0.24 |             |  |
| LOC329506      | 219  | 0.80 | 0.15 | XM_283758.1 |  |
| 4921524K10Rik  | 160  | 0.80 | 0.11 | XM_135176   |  |
| Glipr2         | 48   | 0.80 | 0.13 | NM_027450   |  |
| 9830123K24Rik  | 99   | 0.80 | 0.27 | AK036507    |  |
| LOC243843      | 371  | 0.80 | 0.15 | XM_163162.3 |  |
| Btbd14a        | 41   | 0.80 | 0.24 | NM_026495.2 |  |
| 9830165L15Rik  | 208  | 0.80 | 0.04 | AK036713    |  |
| Glud1          | 591  | 0.80 | 0.08 | NM_008133.2 |  |
| Abcc10         | 49   | 0.80 | 0.05 | NM_170680.1 |  |
| Zfp622         | 43   | 0.80 | 0.04 | NM_144523.2 |  |
| Plxnb1         | 78   | 0.80 | 0.32 | NM_172775.1 |  |
| Mgat4b         | 805  | 0.80 | 0.20 | NM_145926.2 |  |
| Rbm26          | 405  | 0.80 | 0.18 |             |  |
| Nek1           | 157  | 0.80 | 0.19 | XM_356077.1 |  |
| Ap1m2          | 66   | 0.80 | 0.15 | NM_009678.1 |  |
| 5730478M09Rik  | 92   | 0.80 | 0.06 | AK043059    |  |
| 4921505C17Rik  | 501  | 0.80 | 0.19 | NM_030168.2 |  |

|                 |      |      |      |             |  |
|-----------------|------|------|------|-------------|--|
| Nsun3           | 106  | 0.80 | 0.10 | NM_178925.2 |  |
| Pps             | 486  | 0.80 | 0.19 | AK085743    |  |
| 4933421N06Rik   | 84   | 0.80 | 0.02 | AK030204    |  |
| 9830169C09Rik   | 46   | 0.80 | 0.13 | AK036738    |  |
| 4933432B13Rik   | 439  | 0.80 | 0.25 | AK017018    |  |
| 9630021O20Rik   | 63   | 0.80 | 0.30 | AK079321    |  |
| Ier2            | 32   | 0.80 | 0.28 | NM_010499.2 |  |
| PZR1B           | 632  | 0.80 | 0.12 | AK076882    |  |
| Sc5d            | 53   | 0.80 | 0.40 | NM_172769.1 |  |
| LOC384754       | 47   | 0.80 | 0.16 | XM_357843.1 |  |
| Cd2ap           | 39   | 0.80 | 0.17 | NM_009847.2 |  |
| 1700019D06Rik   | 699  | 0.80 | 0.22 | AK006112    |  |
| 9830124H08Rik   | 762  | 0.80 | 0.09 | NM_144842   |  |
| E030002F19Rik   | 346  | 0.80 | 0.06 | AK086807    |  |
| Arid2           | 790  | 0.80 | 0.15 | NM_175251.1 |  |
| 7030419K10Rik   | 318  | 0.80 | 0.28 | AK078604    |  |
| 9930116O05Rik   | 277  | 0.80 | 0.20 | XM_284500.2 |  |
| C130065M15Rik   | 49   | 0.80 | 0.31 | AK081674    |  |
| Hectd2          | 743  | 0.80 | 0.21 | NM_172637.1 |  |
| 2210412D01Rik   | 855  | 0.80 | 0.27 | NM_133722.1 |  |
| Plekhe1         | 125  | 0.80 | 0.03 | NM_133821.1 |  |
| Rasa1           | 1124 | 0.80 | 0.22 | NM_145452   |  |
| Lhx8            | 32   | 0.80 | 0.27 | NM_010713   |  |
| Rnf36           | 64   | 0.80 | 0.14 | NM_080510   |  |
| 4732479N06Rik   | 642  | 0.80 | 0.09 | NM_172540.1 |  |
| Ctsd            | 36   | 0.80 | 0.19 |             |  |
| Dleu2           | 69   | 0.80 | 0.27 |             |  |
| 6530415H11Rik   | 509  | 0.80 | 0.14 |             |  |
| Bnip3l          | 4692 | 0.80 | 0.16 | NM_009761.2 |  |
| 9330161C17Rik   | 41   | 0.80 | 0.16 | AK079084    |  |
| Map4k5          | 33   | 0.80 | 0.35 | AK052373    |  |
| Spnb3           | 79   | 0.80 | 0.26 | XM_129130.5 |  |
| Chek1           | 32   | 0.80 | 0.33 | NM_007691.2 |  |
| 5730453I16Rik   | 1167 | 0.80 | 0.01 | NM_172302.2 |  |
| Scnn1a          | 281  | 0.80 | 0.40 | NM_011324.1 |  |
| scl0001233.1_26 | 90   | 0.80 | 0.31 |             |  |
| 2310031L18Rik   | 117  | 0.80 | 0.20 | NM_026507.2 |  |
| 2610511M17Rik   | 294  | 0.80 | 0.18 | NM_028818.1 |  |
| Rex3            | 91   | 0.80 | 0.20 | NM_009052.1 |  |
| Atp6v1b2        | 5270 | 0.80 | 0.03 | NM_007509.2 |  |
| Pacsin3         | 38   | 0.80 | 0.16 | NM_028733.1 |  |
| 9630055A16Rik   | 118  | 0.80 | 0.14 | AK036303    |  |
| AA175286        | 466  | 0.80 | 0.35 | NM_010156.2 |  |
| 3110018A08Rik   | 610  | 0.80 | 0.08 |             |  |
| Dusp18          | 152  | 0.80 | 0.15 | NM_173745.3 |  |
| Cdk5rap2        | 408  | 0.80 | 0.04 | NM_145990   |  |
| 9930039L23Rik   | 223  | 0.80 | 0.02 | AK037024    |  |
| Stxbp4          | 117  | 0.80 | 0.11 | AK012293    |  |
| Zkscan1         | 421  | 0.80 | 0.28 |             |  |
| 1700007D05Rik   | 34   | 0.80 | 0.20 | AK005698    |  |
| Rev3l           | 1654 | 0.80 | 0.14 | NM_011264.1 |  |
| Frs3            | 54   | 0.80 | 0.25 | NM_144939.1 |  |
| Zdhhc15         | 131  | 0.79 | 0.04 | NM_175358.2 |  |
| Iqgap1          | 1074 | 0.79 | 0.19 | AK029434    |  |
| Snx6            | 2441 | 0.79 | 0.11 | NM_026998.2 |  |
| C130019F04Rik   | 62   | 0.79 | 0.25 | AK081462    |  |
| 1700003B17Rik   | 36   | 0.79 | 0.25 |             |  |
| Phf8            | 64   | 0.79 | 0.07 | NM_177201   |  |
| Ccnf            | 67   | 0.79 | 0.12 | NM_007634.2 |  |
| Nup160          | 1641 | 0.79 | 0.22 | NM_021512.1 |  |
| Zfp87           | 366  | 0.79 | 0.03 | NM_133228.2 |  |
| B930089N03Rik   | 48   | 0.79 | 0.18 | AK081116    |  |
| A230093N12Rik   | 34   | 0.79 | 0.25 | AK039083    |  |
| BC021395        | 368  | 0.79 | 0.14 | NM_144861   |  |
| scl0002306.1_28 | 68   | 0.79 | 0.29 |             |  |
| Rbbp6           | 220  | 0.79 | 0.10 | NM_011247   |  |
| 5330401F18Rik   | 243  | 0.79 | 0.16 |             |  |
| LOC381691       | 99   | 0.79 | 0.22 | XM_355666.1 |  |

|                  |      |      |      |             |  |
|------------------|------|------|------|-------------|--|
| D630004K10Rik    | 521  | 0.79 | 0.18 |             |  |
| LOC385160        | 99   | 0.79 | 0.23 | XM_358093.1 |  |
| A230080D12Rik    | 89   | 0.79 | 0.14 | AK038972    |  |
| Galntl4          | 226  | 0.79 | 0.10 | NM_173739.3 |  |
| 1700007I06Rik    | 31   | 0.79 | 0.20 | NM_027031.1 |  |
| Egf              | 51   | 0.79 | 0.08 | NM_010113.1 |  |
| Serpini1         | 203  | 0.79 | 0.11 |             |  |
| Fmn2             | 92   | 0.79 | 0.23 | AK013585    |  |
| Txndc13          | 2772 | 0.79 | 0.15 |             |  |
| Odz4             | 586  | 0.79 | 0.22 | NM_011858   |  |
| 4921520G13Rik    | 104  | 0.79 | 0.22 | NM_025732.1 |  |
| Znf24            | 449  | 0.79 | 0.29 |             |  |
| Insig1           | 873  | 0.79 | 0.18 | NM_153526.2 |  |
| Acox1            | 33   | 0.79 | 0.18 | AK054446    |  |
| B230114H05Rik    | 1196 | 0.79 | 0.22 | AK045406    |  |
| 1700065A05Rik    | 172  | 0.79 | 0.29 | XM_283972   |  |
| Colq             | 63   | 0.79 | 0.08 |             |  |
| LOC331380        | 44   | 0.79 | 0.17 | XM_285439.2 |  |
| Smarcad1         | 2239 | 0.79 | 0.10 | XM_132597.3 |  |
| Scn2a            | 47   | 0.79 | 0.50 | AK038645    |  |
| Unc13b           | 1749 | 0.79 | 0.21 | NM_021468.1 |  |
| Mbnl             | 53   | 0.79 | 0.03 | AK038242    |  |
| Ubr1             | 766  | 0.79 | 0.18 | NM_009461.1 |  |
| B3bp             | 741  | 0.79 | 0.23 | XM_132065.3 |  |
| Galc             | 74   | 0.79 | 0.17 | AK040189    |  |
| Nudt4            | 2535 | 0.79 | 0.07 | NM_027722.2 |  |
| mKIAA1090        | 53   | 0.79 | 0.34 | AK129287    |  |
| Wdr37            | 177  | 0.79 | 0.15 | NM_172445.1 |  |
| LOC381983        | 38   | 0.79 | 0.13 | XM_356032.1 |  |
| Sync             | 31   | 0.79 | 0.44 | NM_023485.2 |  |
| LOC384122        | 171  | 0.79 | 0.09 | XM_357437.1 |  |
| 1300006M19Rik    | 1037 | 0.79 | 0.07 | XM_144634.1 |  |
| LOC386288        | 52   | 0.79 | 0.24 | XM_359160.1 |  |
| 6330505N24Rik    | 1330 | 0.79 | 0.17 | XM_130991.3 |  |
| Numb             | 242  | 0.79 | 0.08 | NM_010949.1 |  |
| A430070A22Rik    | 142  | 0.79 | 0.20 | AK040147    |  |
| LOC233529        | 31   | 0.79 | 0.41 | XM_133614.4 |  |
| G430064E20Rik    | 34   | 0.79 | 0.37 | AK090020    |  |
| Lrrc4b           | 37   | 0.79 | 0.45 | NM_198250.1 |  |
| Atm              | 181  | 0.79 | 0.13 | NM_007499.1 |  |
| 9830002L24Rik    | 65   | 0.79 | 0.07 | AK036384    |  |
| 0710007J16Rik    | 40   | 0.79 | 0.15 | AK003018    |  |
| Setd2            | 342  | 0.79 | 0.11 |             |  |
| BC033915         | 80   | 0.79 | 0.09 | NM_027498   |  |
| 2410066E13Rik    | 36   | 0.79 | 0.23 | NM_026629   |  |
| Zfhx1a           | 453  | 0.79 | 0.11 | NM_011546.1 |  |
| 1200006F02Rik    | 869  | 0.79 | 0.07 | NM_027872.1 |  |
| Tmed8            | 591  | 0.79 | 0.17 |             |  |
| 9530062G19Rik    | 34   | 0.79 | 0.52 | AK035533    |  |
| Zipro1           | 378  | 0.79 | 0.09 | NM_011757   |  |
| scl0003519.1_175 | 1800 | 0.79 | 0.10 |             |  |
| Cald1            | 84   | 0.79 | 0.35 | BC055908.1  |  |
| 4921518A06Rik    | 2045 | 0.79 | 0.15 | NM_198293.1 |  |
| A530057A03Rik    | 102  | 0.79 | 0.16 | XM_130488.2 |  |
| Mblcd1           | 80   | 0.79 | 0.05 | NM_178728.3 |  |
| 5830454D03Rik    | 444  | 0.79 | 0.11 |             |  |
| 2310045K21Rik    | 411  | 0.79 | 0.24 | AK009823    |  |
| Plp              | 80   | 0.79 | 0.19 | NM_011123   |  |
| Snx13            | 644  | 0.79 | 0.19 | XM_126867.4 |  |
| Ube2u            | 59   | 0.79 | 0.28 |             |  |
| Dlgh4            | 86   | 0.79 | 0.17 | NM_007864.1 |  |
| Mef2a            | 157  | 0.79 | 0.18 | NM_013597   |  |
| AI315068         | 163  | 0.79 | 0.25 | XM_484535   |  |
| LOC380623        | 63   | 0.79 | 0.18 | XM_358377.1 |  |
| LOC381995        | 136  | 0.79 | 0.14 | XM_356054.1 |  |
| 2810425F24Rik    | 988  | 0.79 | 0.21 | XM_193975.3 |  |
| LOC386199        | 68   | 0.79 | 0.22 | XM_359116.1 |  |
| D130059P03Rik    | 367  | 0.79 | 0.11 | NM_177185.3 |  |

|                  |      |      |      |             |  |
|------------------|------|------|------|-------------|--|
| Msl31            | 81   | 0.79 | 0.18 | NM_010832   |  |
| Akt3             | 1786 | 0.79 | 0.07 | NM_011785.2 |  |
| Nipbl            | 1221 | 0.79 | 0.06 |             |  |
| Lyst             | 38   | 0.79 | 0.21 | NM_010748.1 |  |
| LOC333744        | 803  | 0.79 | 0.29 | XM_289803.2 |  |
| 4932418B07Rik    | 38   | 0.79 | 0.05 | AK030051    |  |
| 5730439E10Rik    | 171  | 0.79 | 0.11 | NM_175324.2 |  |
| Kifap3           | 772  | 0.79 | 0.05 | NM_010629   |  |
| scl0003503.1_32  | 133  | 0.79 | 0.06 |             |  |
| Fut1             | 51   | 0.79 | 0.30 | NM_008051.1 |  |
| Osbp15           | 40   | 0.79 | 0.30 | NM_024289.1 |  |
| Pik3c3           | 2018 | 0.79 | 0.12 | NM_181414.3 |  |
| 2700016E08Rik    | 32   | 0.79 | 0.08 | AK030203    |  |
| A130017C09Rik    | 54   | 0.79 | 0.21 | AK037420    |  |
| 5930405J04Rik    | 395  | 0.79 | 0.32 | NM_198160.1 |  |
| Arl10c           | 681  | 0.79 | 0.17 | NM_026011.2 |  |
| 5330430O04Rik    | 31   | 0.79 | 0.49 | AK030553    |  |
| scl0003998.1_329 | 1883 | 0.79 | 0.12 |             |  |
| Ubx4             | 36   | 0.79 | 0.11 | NM_145441   |  |
| B830028P19Rik    | 162  | 0.79 | 0.14 | NM_172998.1 |  |
| A730020L24Rik    | 31   | 0.79 | 0.38 | AK042745    |  |
| Usp33            | 581  | 0.79 | 0.19 | NM_133247   |  |
| Esco2            | 487  | 0.79 | 0.13 |             |  |
| LOC381607        | 56   | 0.79 | 0.32 | XM_355563.1 |  |
| Suv420h1         | 165  | 0.79 | 0.18 |             |  |
| Ppm1e            | 190  | 0.79 | 0.22 | XM_484060   |  |
| 2310032D16Rik    | 809  | 0.79 | 0.21 | NM_027096   |  |
| Ndfip2           | 209  | 0.79 | 0.11 | NM_029561.1 |  |
| 4930507C10Rik    | 30   | 0.79 | 0.30 | NM_030175.1 |  |
| 1500041N16Rik    | 36   | 0.79 | 0.24 | NM_026399.1 |  |
| LOC380925        | 46   | 0.79 | 0.29 | XM_354832.1 |  |
| EG624866         | 196  | 0.79 | 0.06 |             |  |
| Sgk              | 5237 | 0.79 | 0.06 | NM_011361   |  |
| 6720480F11Rik    | 33   | 0.79 | 0.73 | AK078454    |  |
| Birc2            | 569  | 0.79 | 0.08 | NM_007465.1 |  |
| Wdr23            | 174  | 0.79 | 0.31 | NM_133734.1 |  |
| A430107N12Rik    | 391  | 0.79 | 0.07 |             |  |
| Pde10a           | 49   | 0.79 | 0.15 | NM_011866.1 |  |
| Prps2            | 743  | 0.79 | 0.26 | NM_026662.2 |  |
| Arpp19           | 1619 | 0.79 | 0.18 | NM_021548.3 |  |
| Atf2             | 609  | 0.79 | 0.16 | NM_009715   |  |
| 4930431B11Rik    | 182  | 0.79 | 0.08 | NM_029434.1 |  |
| 2810455K09Rik    | 31   | 0.78 | 0.23 | XM_138271.2 |  |
| Spin             | 171  | 0.78 | 0.10 | NM_011462.1 |  |
| 2700050F09Rik    | 61   | 0.78 | 0.20 | NM_028291.2 |  |
| Mgea5            | 78   | 0.78 | 0.20 | AK012695    |  |
| Pip3ap           | 401  | 0.78 | 0.15 | NM_172958.2 |  |
| Aak1             | 44   | 0.78 | 0.07 |             |  |
| 2510002A14Rik    | 245  | 0.78 | 0.05 | NM_028194.1 |  |
| D030041G07Rik    | 44   | 0.78 | 0.38 | AK083529    |  |
| LOC278795        | 47   | 0.78 | 0.21 | XM_204937.3 |  |
| 2310051F07Rik    | 1257 | 0.78 | 0.18 |             |  |
| Myo7a            | 184  | 0.78 | 0.12 | NM_008663.1 |  |
| Ppargc1a         | 455  | 0.78 | 0.21 | NM_008904.1 |  |
| Gna14            | 290  | 0.78 | 0.15 | NM_008137.2 |  |
| A630056H20Rik    | 128  | 0.78 | 0.13 | AK042081    |  |
| Pgm2l1           | 50   | 0.78 | 0.21 | NM_027629   |  |
| E030041M21Rik    | 919  | 0.78 | 0.09 | NM_029166.1 |  |
| D930014N22Rik    | 41   | 0.78 | 0.38 |             |  |
| Btbd9            | 198  | 0.78 | 0.18 | NM_172618.1 |  |
| 5033405K12Rik    | 639  | 0.78 | 0.22 | NM_153567   |  |
| Tgfbr1           | 974  | 0.78 | 0.10 | NM_009370.2 |  |
| Pdzd8            | 170  | 0.78 | 0.28 |             |  |
| C920016N10Rik    | 58   | 0.78 | 0.32 | AK083355    |  |
| Gys3             | 186  | 0.78 | 0.05 | NM_008195.1 |  |
| Smad6            | 64   | 0.78 | 0.11 | NM_008542   |  |
| LOC626359        | 37   | 0.78 | 0.27 |             |  |
| Apbb3            | 87   | 0.78 | 0.09 | NM_146085.1 |  |

|                 |      |      |      |             |  |
|-----------------|------|------|------|-------------|--|
| scl0001689.1_10 | 88   | 0.78 | 0.14 |             |  |
| LOC381163       | 54   | 0.78 | 0.27 | XM_355084.1 |  |
| 2210010N04Rik   | 155  | 0.78 | 0.00 | XM_149712.5 |  |
| Posh-pending    | 30   | 0.78 | 0.24 | AK035372    |  |
| Rap1gap         | 442  | 0.78 | 0.04 |             |  |
| Ppp2r1b         | 89   | 0.78 | 0.29 | XM_284491   |  |
| LOC270579       | 191  | 0.78 | 0.34 | XM_194609.3 |  |
| A430041B07Rik   | 310  | 0.78 | 0.29 | XM_484151   |  |
| Tnrc6b          | 34   | 0.78 | 0.19 |             |  |
| Tug1            | 528  | 0.78 | 0.21 |             |  |
| Spire1          | 250  | 0.78 | 0.03 | NM_176832.1 |  |
| 4933427G17Rik   | 47   | 0.78 | 0.30 | XM_133717   |  |
| Zfp75           | 592  | 0.78 | 0.12 | NM_172918.3 |  |
| 9030018K07Rik   | 49   | 0.78 | 0.25 | AK033420    |  |
| 2310067G05Rik   | 105  | 0.78 | 0.18 | XM_147277.1 |  |
| Spon2           | 310  | 0.78 | 0.10 | NM_133903.2 |  |
| Chuk            | 1076 | 0.78 | 0.13 | NM_007700.1 |  |
| Lrrc3           | 46   | 0.78 | 0.14 | NM_145152.2 |  |
| C130086A10      | 932  | 0.78 | 0.10 | NM_173746.2 |  |
| LOC381568       | 34   | 0.78 | 0.42 | XM_355530.1 |  |
| Hps5            | 87   | 0.78 | 0.20 | AF534396    |  |
| Tmem168         | 112  | 0.78 | 0.38 |             |  |
| Ctps2           | 320  | 0.78 | 0.05 | NM_018737.2 |  |
| LOC236228       | 41   | 0.78 | 0.19 | XM_135566.2 |  |
| Bcl2l11         | 345  | 0.78 | 0.11 | NM_009754.2 |  |
| LOC385260       | 63   | 0.78 | 0.04 | XM_358156.1 |  |
| Ube2j1          | 349  | 0.78 | 0.11 | NM_019586.2 |  |
| Rsb1l           | 156  | 0.78 | 0.36 | XM_144208.3 |  |
| Ireb2           | 345  | 0.78 | 0.25 | XM_134910.3 |  |
| Hook1           | 77   | 0.78 | 0.32 | NM_030014.2 |  |
| Slc16a13        | 85   | 0.78 | 0.13 | NM_172371   |  |
| Serping1        | 51   | 0.78 | 0.01 | NM_009776   |  |
| Fnip1           | 557  | 0.78 | 0.15 |             |  |
| LOC384188       | 86   | 0.78 | 0.29 | XM_357476.1 |  |
| LOC639396       | 64   | 0.78 | 0.39 |             |  |
| Senp7           | 229  | 0.78 | 0.15 |             |  |
| Perq1           | 330  | 0.78 | 0.35 | NM_031408.1 |  |
| Zfp90           | 318  | 0.78 | 0.14 | NM_011764.2 |  |
| Vps41           | 156  | 0.78 | 0.12 | NM_172120.2 |  |
| Sec15l1         | 221  | 0.78 | 0.18 | NM_175353   |  |
| Nap1l1          | 1891 | 0.78 | 0.09 | NM_015781.2 |  |
| LOC192195       | 362  | 0.78 | 0.01 | XM_149324.1 |  |
| Trove2          | 609  | 0.78 | 0.09 |             |  |
| 1200006O19Rik   | 1076 | 0.78 | 0.24 | NM_026164.1 |  |
| 9030016H15Rik   | 70   | 0.78 | 0.28 | AK078845    |  |
| LOC384279       | 78   | 0.78 | 0.16 | XM_357537.1 |  |
| LOC243328       | 180  | 0.78 | 0.27 | XM_144623.1 |  |
| Ap1s3           | 66   | 0.78 | 0.19 | NM_183027.1 |  |
| Alg2            | 1334 | 0.78 | 0.11 | NM_019998   |  |
| Utx             | 795  | 0.78 | 0.18 | AK045533    |  |
| Plcl2           | 655  | 0.78 | 0.20 | NM_013880   |  |
| LOC546840       | 34   | 0.78 | 0.15 |             |  |
| Entpd7          | 37   | 0.78 | 0.22 | NM_053103.1 |  |
| E430029E19Rik   | 114  | 0.78 | 0.16 | AK088860    |  |
| 4631403P03Rik   | 33   | 0.78 | 0.21 | NM_153793.1 |  |
| E430036I04Rik   | 188  | 0.78 | 0.16 | NM_133897.1 |  |
| 9130422H11Rik   | 833  | 0.78 | 0.05 | AK078972    |  |
| 6430596G11Rik   | 131  | 0.78 | 0.06 | NM_172739.1 |  |
| 4933413H15Rik   | 120  | 0.78 | 0.27 | AK030186    |  |
| Pcaf            | 119  | 0.78 | 0.26 | NM_020005.1 |  |
| Trim23          | 332  | 0.78 | 0.27 | NM_030731.1 |  |
| Rock2           | 258  | 0.78 | 0.28 | NM_009072.1 |  |
| Plxdc1          | 45   | 0.78 | 0.25 | NM_028199.2 |  |
| Rnf111          | 73   | 0.78 | 0.08 | NM_033604.1 |  |
| Zfp62           | 106  | 0.78 | 0.28 | NM_009562.1 |  |
| BC035291        | 1687 | 0.78 | 0.17 | NM_177581.2 |  |
| Dpysl5          | 235  | 0.78 | 0.17 |             |  |
| Ncoa4           | 424  | 0.78 | 0.19 | NM_019744   |  |

|                 |      |      |      |             |  |
|-----------------|------|------|------|-------------|--|
| Klhl24          | 123  | 0.78 | 0.21 |             |  |
| D330038K10Rik   | 156  | 0.78 | 0.21 | NM_173028.1 |  |
| BC042901        | 446  | 0.78 | 0.18 | NM_175021.1 |  |
| Smurf2          | 379  | 0.78 | 0.16 | XM_126673   |  |
| 3110057O12Rik   | 66   | 0.78 | 0.17 | NM_026622.1 |  |
| LOC381358       | 202  | 0.78 | 0.17 | XM_355324.1 |  |
| Usp43           | 48   | 0.78 | 0.09 | NM_173754.2 |  |
| D230021E06Rik   | 70   | 0.78 | 0.46 | AK051937    |  |
| 5730433N10Rik   | 116  | 0.78 | 0.24 | XM_149059.1 |  |
| Akap3           | 128  | 0.78 | 0.27 | NM_009650.1 |  |
| 1700047E16Rik   | 71   | 0.78 | 0.12 | NM_173431.1 |  |
| LOC236397       | 32   | 0.78 | 0.16 | XM_142956.5 |  |
| Zfml            | 383  | 0.78 | 0.13 | BC076615    |  |
| Abhd3           | 66   | 0.78 | 0.11 | NM_134130.1 |  |
| Ctsf            | 327  | 0.78 | 0.15 | NM_019861.1 |  |
| C130078B07Rik   | 43   | 0.78 | 0.25 | AK081796    |  |
| 1110002E22Rik   | 360  | 0.78 | 0.27 |             |  |
| Dyrk1a          | 612  | 0.78 | 0.17 | NM_007890   |  |
| Capn7           | 1490 | 0.78 | 0.19 | NM_009796.1 |  |
| 2010001M09Rik   | 138  | 0.78 | 0.23 | NM_027222.1 |  |
| Fblim1          | 82   | 0.78 | 0.15 |             |  |
| Al746432        | 31   | 0.78 | 0.26 | XM_127943.2 |  |
| Centd2          | 46   | 0.78 | 0.10 | NM_027180.2 |  |
| Zbtb3           | 73   | 0.78 | 0.10 | NM_133759.1 |  |
| Nfkb2           | 38   | 0.78 | 0.41 | NM_019408.1 |  |
| C79407          | 499  | 0.78 | 0.24 | NM_172578.2 |  |
| D11Ert730e      | 159  | 0.78 | 0.15 | NM_198936.1 |  |
| Kifc5b          | 39   | 0.78 | 0.28 |             |  |
| Zfp236          | 464  | 0.78 | 0.19 | NM_177832.2 |  |
| LOC226758       | 39   | 0.78 | 0.20 | XM_129620.2 |  |
| D10Ert802e      | 115  | 0.78 | 0.26 | NM_198021.1 |  |
| 2310047115Rik   | 243  | 0.77 | 0.05 | NM_030207.1 |  |
| 4732455O04Rik   | 649  | 0.77 | 0.10 | AK028779    |  |
| Sybl1           | 783  | 0.77 | 0.30 | NM_011515.1 |  |
| D330004C03Rik   | 403  | 0.77 | 0.18 | AK084470    |  |
| Trim33          | 207  | 0.77 | 0.26 | NM_053170.1 |  |
| Tcf4            | 2304 | 0.77 | 0.09 | NM_013685.1 |  |
| Rgmb            | 55   | 0.77 | 0.14 | NM_178615.3 |  |
| 2810028N01Rik   | 63   | 0.77 | 0.30 | NM_028315.1 |  |
| scl000648.1_30  | 31   | 0.77 | 0.28 |             |  |
| 0610037B23Rik   | 53   | 0.77 | 0.09 | AK002767    |  |
| Tmem19          | 145  | 0.77 | 0.18 | NM_133683.1 |  |
| Matk            | 32   | 0.77 | 0.23 | AK018182    |  |
| 2410089E03Rik   | 43   | 0.77 | 0.32 | XM_127911.3 |  |
| 4930465J06Rik   | 288  | 0.77 | 0.24 | AK029681    |  |
| BC024502        | 72   | 0.77 | 0.17 | NM_173393.1 |  |
| Dnm             | 77   | 0.77 | 0.10 | NM_010065.1 |  |
| Slc7a6          | 291  | 0.77 | 0.10 | NM_178798.2 |  |
| Fbxo3           | 594  | 0.77 | 0.23 | NM_212433.1 |  |
| EG622320        | 111  | 0.77 | 0.15 |             |  |
| LOC385207       | 177  | 0.77 | 0.19 | XM_358119.1 |  |
| 2210410E06Rik   | 5865 | 0.77 | 0.12 |             |  |
| Paics           | 140  | 0.77 | 0.18 | NM_025939.2 |  |
| Kif11           | 385  | 0.77 | 0.09 | NM_010615.1 |  |
| LOC226486       | 115  | 0.77 | 0.11 | XM_129521.2 |  |
| LOC223599       | 114  | 0.77 | 0.25 | XM_128290.2 |  |
| 2410193C02Rik   | 153  | 0.77 | 0.17 | XM_134313   |  |
| C530046L02Rik   | 52   | 0.77 | 0.11 | NM_173186.2 |  |
| Eaf1            | 47   | 0.77 | 0.63 | NM_028932.2 |  |
| Zfp291          | 130  | 0.77 | 0.07 | NM_175536.2 |  |
| D330005C11Rik   | 41   | 0.77 | 0.48 | NM_176905.2 |  |
| 4833432M17Rik   | 76   | 0.77 | 0.22 | NM_198654   |  |
| Zfyve27         | 151  | 0.77 | 0.05 | NM_177319.2 |  |
| scl0001259.1_60 | 153  | 0.77 | 0.11 |             |  |
| LOC381260       | 163  | 0.77 | 0.21 | XM_355202.1 |  |
| Pbx3            | 195  | 0.77 | 0.02 | NM_016768.1 |  |
| D830013H12      | 1087 | 0.77 | 0.08 | NM_177860.2 |  |
| 8030451K01Rik   | 53   | 0.77 | 0.20 | NM_172501   |  |

|                 |      |      |      |             |  |
|-----------------|------|------|------|-------------|--|
| BC005537        | 1298 | 0.77 | 0.32 | NM_024473.2 |  |
| LOC242997       | 39   | 0.77 | 0.09 | XM_144338.3 |  |
| Gclc            | 91   | 0.77 | 0.31 | NM_010295.1 |  |
| 2810423E13Rik   | 177  | 0.77 | 0.16 | NM_028140.2 |  |
| 9330177P20Rik   | 312  | 0.77 | 0.13 | NM_177462.2 |  |
| 4932408C11Rik   | 63   | 0.77 | 0.24 | AK029932    |  |
| LOC383369       | 42   | 0.77 | 0.19 | XM_357013.1 |  |
| Padi4           | 316  | 0.77 | 0.13 | NM_011061.1 |  |
| Kif21a          | 1178 | 0.77 | 0.17 | NM_016705   |  |
| Jak3            | 53   | 0.77 | 0.06 | NM_010589   |  |
| Sirt1           | 801  | 0.77 | 0.05 | NM_019812.1 |  |
| AW547186        | 106  | 0.77 | 0.27 | NM_177592   |  |
| Ktn1            | 34   | 0.77 | 0.51 | NM_008477   |  |
| D430041B17      | 155  | 0.77 | 0.12 | NM_172737.1 |  |
| E230024F20Rik   | 68   | 0.77 | 0.24 | AK054164    |  |
| Ctdspl          | 298  | 0.77 | 0.10 | NM_133710.1 |  |
| A830055I09Rik   | 175  | 0.77 | 0.12 | AK043943    |  |
| 4632418H02Rik   | 73   | 0.77 | 0.10 | XM_150247.1 |  |
| Herc4           | 406  | 0.77 | 0.21 |             |  |
| B230329O19Rik   | 32   | 0.77 | 0.13 | AK045978    |  |
| LOC381696       | 78   | 0.77 | 0.56 | XM_355670.1 |  |
| Setbp1          | 67   | 0.77 | 0.23 | XM_140508.2 |  |
| Ranbp6          | 40   | 0.77 | 0.09 | NM_177721.2 |  |
| Tgm5            | 101  | 0.77 | 0.13 | NM_028799.1 |  |
| Cdc27           | 218  | 0.77 | 0.25 | XM_484088   |  |
| Parc            | 114  | 0.77 | 0.29 | XM_355017.1 |  |
| Usp9x           | 175  | 0.77 | 0.31 | AK053279    |  |
| Rnf2            | 247  | 0.77 | 0.42 | NM_011277.1 |  |
| 9930122J16Rik   | 253  | 0.77 | 0.36 | AK037129    |  |
| BC036313        | 68   | 0.77 | 0.23 | XM_196119   |  |
| E030007N04Rik   | 477  | 0.77 | 0.19 | AK086880    |  |
| TRGV4_AF03735   | 36   | 0.77 | 0.33 |             |  |
| LOC382930       | 790  | 0.77 | 0.19 | XM_356754.1 |  |
| 2900090M10Rik   | 76   | 0.77 | 0.15 | NM_177868.2 |  |
| Tcp11           | 57   | 0.77 | 0.22 | AK053725    |  |
| scl0002124.1_39 | 37   | 0.77 | 0.34 |             |  |
| Rif1            | 306  | 0.77 | 0.28 |             |  |
| 7420700D11Rik   | 244  | 0.77 | 0.22 | AK033036    |  |
| 1700065O13Rik   | 272  | 0.77 | 0.14 | XM_128550.3 |  |
| Senp8           | 65   | 0.77 | 0.15 | NM_027838.2 |  |
| 2600014M03Rik   | 294  | 0.77 | 0.10 | NM_178620.2 |  |
| Adam10          | 93   | 0.77 | 0.25 | NM_007399.1 |  |
| Irf2bp2         | 364  | 0.77 | 0.10 | XM_284454   |  |
| A430031N04      | 137  | 0.77 | 0.15 | NM_177718.2 |  |
| Mccc2           | 72   | 0.77 | 0.17 | XM_127493.3 |  |
| Brca1           | 114  | 0.77 | 0.09 | NM_009764.2 |  |
| Man2a2          | 41   | 0.77 | 0.08 | NM_172903.1 |  |
| D7Bwg0611e      | 230  | 0.77 | 0.09 | NM_027898.2 |  |
| D630041L13Rik   | 35   | 0.77 | 0.19 | AK052744    |  |
| Foxp1           | 487  | 0.77 | 0.09 | NM_053202.1 |  |
| Pde4a           | 45   | 0.77 | 0.10 | NM_019798.2 |  |
| A130099L09Rik   | 96   | 0.77 | 0.27 | AK038374    |  |
| AW555814        | 273  | 0.77 | 0.37 | NM_173760   |  |
| Lrp6            | 71   | 0.77 | 0.06 | NM_008514.1 |  |
| Catnd2          | 135  | 0.77 | 0.12 | NM_008729.1 |  |
| 3110004L20Rik   | 45   | 0.77 | 0.48 | XM_127295   |  |
| 4930535I16Rik   | 31   | 0.77 | 0.19 | AK015982    |  |
| LOC232047       | 34   | 0.77 | 0.01 | XM_144788.2 |  |
| Nr3c1           | 87   | 0.77 | 0.29 | NM_008173.1 |  |
| Prkaa1          | 48   | 0.77 | 0.18 | XM_139298.4 |  |
| Fgfr2           | 981  | 0.77 | 0.12 | NM_010207   |  |
| B230112P13Rik   | 653  | 0.77 | 0.11 |             |  |
| 2310009E04Rik   | 99   | 0.76 | 0.11 | XM_131496.4 |  |
| Akap10          | 132  | 0.76 | 0.08 | AK051044    |  |
| Scd1            | 546  | 0.76 | 0.14 | NM_009127.2 |  |
| 4732423E21Rik   | 287  | 0.76 | 0.18 |             |  |
| Suhw4           | 247  | 0.76 | 0.10 | NM_146224.2 |  |
| Theg            | 31   | 0.76 | 0.27 | NM_199226.1 |  |

|                 |      |      |      |             |  |
|-----------------|------|------|------|-------------|--|
| Rbl1            | 219  | 0.76 | 0.01 | NM_011249.1 |  |
| Zfp26           | 43   | 0.76 | 0.23 | AK082002    |  |
| Mest            | 60   | 0.76 | 0.09 | NM_008590.1 |  |
| Rab11fip2       | 139  | 0.76 | 0.24 | XM_129331.1 |  |
| Rassf4          | 326  | 0.76 | 0.18 | NM_178045.3 |  |
| 5830412B09Rik   | 343  | 0.76 | 0.28 | AK049568    |  |
| BC023179        | 74   | 0.76 | 0.12 | NM_145577.1 |  |
| Usp8            | 297  | 0.76 | 0.22 | NM_019729.2 |  |
| Jmjd1a          | 2360 | 0.76 | 0.16 | XM_194279   |  |
| Zc3hdc6         | 407  | 0.76 | 0.29 | NM_178404.2 |  |
| Frm4a           | 57   | 0.76 | 0.07 | NM_172475.2 |  |
| Cyip1           | 160  | 0.76 | 0.15 | BC052713    |  |
| Plek            | 37   | 0.76 | 0.22 | NM_019549   |  |
| Slc40a1         | 1346 | 0.76 | 0.17 | NM_016917.1 |  |
| Mettl4          | 117  | 0.76 | 0.27 | XM_135413.4 |  |
| 2810455B08Rik   | 52   | 0.76 | 0.12 |             |  |
| Syn2            | 289  | 0.76 | 0.14 | AK043584    |  |
| Fech            | 142  | 0.76 | 0.08 | AK083560    |  |
| 2310038H17Rik   | 493  | 0.76 | 0.15 | NM_025964.2 |  |
| scl0002694.1_23 | 219  | 0.76 | 0.14 |             |  |
| Madd            | 127  | 0.76 | 0.08 | NM_145527.2 |  |
| scl0002337.1_39 | 951  | 0.76 | 0.20 |             |  |
| Zfp661          | 228  | 0.76 | 0.15 |             |  |
| C630007L23Rik   | 341  | 0.76 | 0.30 | AK049893    |  |
| Pomt1           | 50   | 0.76 | 0.11 | NM_145145.1 |  |
| Mapk8ip3        | 39   | 0.76 | 0.06 | AK035619    |  |
| Zfp143          | 292  | 0.76 | 0.13 | NM_009281   |  |
| BC038156        | 376  | 0.76 | 0.31 | NM_177768.2 |  |
| 6330407I18Rik   | 211  | 0.76 | 0.21 |             |  |
| Eml5            | 92   | 0.76 | 0.15 | NM_178409.2 |  |
| 2810047L02Rik   | 190  | 0.76 | 0.20 | AK012919    |  |
| BC042768        | 315  | 0.76 | 0.12 | XM_148273.4 |  |
| B230205M03      | 168  | 0.76 | 0.20 | NM_177687.2 |  |
| Inpp4a          | 114  | 0.76 | 0.10 | NM_030266   |  |
| Tox             | 319  | 0.76 | 0.39 | NM_145711.2 |  |
| Elf4            | 50   | 0.76 | 0.11 | NM_019680.1 |  |
| Gpr22           | 34   | 0.76 | 0.31 | NM_175191.2 |  |
| Pnlpp1          | 278  | 0.76 | 0.20 | NM_018874.1 |  |
| B130005N20Rik   | 48   | 0.76 | 0.36 | AK044821    |  |
| Gpiap1          | 4416 | 0.76 | 0.13 | NM_016739.2 |  |
| Cul4b           | 575  | 0.76 | 0.32 | NM_028288.3 |  |
| Asxl2           | 56   | 0.76 | 0.15 | NM_172421   |  |
| Gpr160          | 31   | 0.76 | 0.19 | XM_130823.3 |  |
| 1300007F04Rik   | 124  | 0.76 | 0.37 | NM_026185.1 |  |
| 4931400A14Rik   | 318  | 0.76 | 0.20 | NM_028887   |  |
| Btrc            | 249  | 0.76 | 0.11 | NM_009771.1 |  |
| 4933428F06Rik   | 34   | 0.76 | 0.08 |             |  |
| Brdt            | 86   | 0.76 | 0.17 | NM_054054.1 |  |
| Tbc1d23         | 841  | 0.76 | 0.06 |             |  |
| 9930013M16Rik   | 53   | 0.76 | 0.10 | AK036810    |  |
| Hbp1            | 2540 | 0.76 | 0.02 | NM_177993.1 |  |
| AV249152        | 76   | 0.76 | 0.14 | NM_145425.2 |  |
| Sox4            | 264  | 0.76 | 0.23 | NM_009238   |  |
| LOC385392       | 49   | 0.76 | 0.39 | XM_358222.1 |  |
| Hipk1           | 121  | 0.76 | 0.24 | NM_010432   |  |
| 9830164M16Rik   | 36   | 0.76 | 0.46 | AK036700    |  |
| Snap91          | 143  | 0.76 | 0.21 | NM_013669.1 |  |
| LOC386091       | 665  | 0.76 | 0.09 | XM_359066.1 |  |
| Ush1c           | 64   | 0.76 | 0.09 | NM_023649.1 |  |
| Herc2           | 1332 | 0.76 | 0.12 | NM_010418.1 |  |
| Ank2            | 114  | 0.76 | 0.08 | NM_178655   |  |
| Snx14           | 894  | 0.76 | 0.16 | NM_172926.1 |  |
| Sec5l1          | 887  | 0.76 | 0.15 | NM_025588.2 |  |
| Smek2           | 735  | 0.76 | 0.28 |             |  |
| Uhmk1           | 59   | 0.76 | 0.10 |             |  |
| Tbc1d8          | 283  | 0.76 | 0.33 | NM_018775   |  |
| PLA2            | 96   | 0.76 | 0.16 | AK033572    |  |
| A530050O19Rik   | 50   | 0.76 | 0.26 | AK040951    |  |



|               |      |      |      |             |  |
|---------------|------|------|------|-------------|--|
| 9330152L17    | 149  | 0.76 | 0.08 | NM_177917.2 |  |
| D330022O09Rik | 215  | 0.76 | 0.21 | AK021286    |  |
| Melk          | 237  | 0.76 | 0.11 | NM_010790.2 |  |
| 8430415E04Rik | 45   | 0.76 | 0.16 | NM_028980.1 |  |
| Eppk1         | 51   | 0.76 | 0.34 | NM_144848.2 |  |
| Pkia          | 1160 | 0.76 | 0.16 | NM_008862.2 |  |
| C130060B01Rik | 64   | 0.76 | 0.15 | AK048425    |  |
| Eif2s2        | 3081 | 0.76 | 0.06 | NM_026030.1 |  |
| 2610524N02Rik | 349  | 0.76 | 0.25 | AK012153    |  |
| 5832424M12    | 2026 | 0.76 | 0.18 | NM_172591.2 |  |
| Arl4          | 699  | 0.76 | 0.07 | NM_007487.2 |  |
| 9530046K08Rik | 650  | 0.76 | 0.21 | AK079236    |  |
| 5830427D02Rik | 123  | 0.76 | 0.04 |             |  |
| LOC544988     | 73   | 0.76 | 0.13 |             |  |
| AW548124      | 151  | 0.76 | 0.11 | XM_128778.5 |  |
| A430105I05Rik | 77   | 0.76 | 0.11 | AK040531    |  |
| Tbl1xr1       | 60   | 0.76 | 0.16 |             |  |
| 6430514L14Rik | 137  | 0.76 | 0.15 | XM_135000.3 |  |
| Ubce7ip1      | 105  | 0.76 | 0.14 | NM_080561.3 |  |
| 3110001A05Rik | 116  | 0.76 | 0.23 | AK013931    |  |
| Sh3bgrl       | 859  | 0.76 | 0.25 | NM_019989.2 |  |
| LOC380757     | 93   | 0.76 | 0.33 | XM_354670.1 |  |
| Rbp1          | 34   | 0.76 | 0.59 | NM_011254.2 |  |
| Foxp3         | 32   | 0.76 | 0.12 | NM_054039.1 |  |
| 2810405K07Rik | 146  | 0.76 | 0.18 | NM_028141   |  |
| Gprc2a        | 111  | 0.76 | 0.33 | NM_013803.1 |  |
| C130092E12    | 730  | 0.76 | 0.16 |             |  |
| D230019K24Rik | 153  | 0.76 | 0.03 | AK051923    |  |
| Pcsk1         | 30   | 0.76 | 0.34 | AK043742    |  |
| E130301F21Rik | 461  | 0.76 | 0.22 | AK087467    |  |
| Maml1         | 152  | 0.75 | 0.17 | NM_175334.2 |  |
| Tmod3         | 866  | 0.75 | 0.07 | NM_016963.1 |  |
| D030010H02Rik | 63   | 0.75 | 0.26 | AK083433    |  |
| Acsl3         | 305  | 0.75 | 0.15 | XM_129894.4 |  |
| Pim1          | 30   | 0.75 | 0.31 | NM_008842.2 |  |
| Ppp1r1c       | 103  | 0.75 | 0.16 | AK039877    |  |
| A430088H15Rik | 184  | 0.75 | 0.10 | AK040354    |  |
| C030017D11Rik | 213  | 0.75 | 0.13 | AK047718    |  |
| 5430419F02Rik | 1170 | 0.75 | 0.07 | AK017320    |  |
| Cipp          | 65   | 0.75 | 0.25 | NM_172696   |  |
| Cln2          | 115  | 0.75 | 0.07 | AK083832    |  |
| LOC384382     | 161  | 0.75 | 0.29 | XM_357613.1 |  |
| Pcdhgc4       | 40   | 0.75 | 0.10 | NM_033582.2 |  |
| 4832442G16Rik | 71   | 0.75 | 0.23 | AK029343    |  |
| Smyd3         | 54   | 0.75 | 0.33 | NM_027188.2 |  |
| Dbpht2        | 119  | 0.75 | 0.10 | NM_198866.1 |  |
| Cnot6l        | 288  | 0.75 | 0.11 | NM_144910.1 |  |
| Nefh          | 110  | 0.75 | 0.40 | NM_010904.2 |  |
| 4921517B04Rik | 83   | 0.75 | 0.07 | XM_131208.3 |  |
| Camsap111     | 162  | 0.75 | 0.23 |             |  |
| LOC380888     | 82   | 0.75 | 0.25 | XM_354797.1 |  |
| 1700069O15Rik | 149  | 0.75 | 0.21 | NM_173441.1 |  |
| 1190002N15Rik | 499  | 0.75 | 0.22 | XM_147036   |  |
| Smc2l1        | 82   | 0.75 | 0.12 | NM_008017.2 |  |
| Golga5        | 1435 | 0.75 | 0.12 | NM_013747.2 |  |
| 4930532D21Rik | 39   | 0.75 | 0.13 | NM_180958.1 |  |
| Cc1           | 268  | 0.75 | 0.28 | XM_123485.1 |  |
| LOC385662     | 82   | 0.75 | 0.34 | XM_358872.1 |  |
| D14Etd581e    | 143  | 0.75 | 0.18 | NM_029454.3 |  |
| Cxcr4         | 38   | 0.75 | 0.08 | NM_009911.2 |  |
| E130113K22Rik | 133  | 0.75 | 0.22 | BC061492    |  |
| Sav1          | 1986 | 0.75 | 0.15 | NM_022028.1 |  |
| Alcam         | 1020 | 0.75 | 0.11 | NM_009655.1 |  |
| A830091E24Rik | 66   | 0.75 | 0.25 | AK044111    |  |
| LOC225217     | 93   | 0.75 | 0.21 | XM_123269.5 |  |
| Mlh1          | 52   | 0.75 | 0.39 | NM_026810.1 |  |
| LOC546723     | 82   | 0.75 | 0.17 |             |  |
| Gdpd3         | 580  | 0.75 | 0.06 |             |  |

|                 |      |      |      |             |  |
|-----------------|------|------|------|-------------|--|
| D030035F05Rik   | 131  | 0.75 | 0.14 | AK050919    |  |
| D530007H06Rik   | 174  | 0.75 | 0.22 | AK052561    |  |
| BC030477        | 165  | 0.75 | 0.17 | NM_177618.4 |  |
| Arntl           | 409  | 0.75 | 0.07 | NM_007489.1 |  |
| Glcc1           | 80   | 0.75 | 0.25 | NM_178072.2 |  |
| Lmln            | 67   | 0.75 | 0.05 | NM_172823.1 |  |
| 4921514L11Rik   | 174  | 0.75 | 0.26 | AK014897    |  |
| Pcdhgb8         | 44   | 0.75 | 0.14 | NM_033580.1 |  |
| 3830406C13Rik   | 423  | 0.75 | 0.05 | NM_178141.1 |  |
| 5031400M07Rik   | 265  | 0.75 | 0.11 | NM_020586   |  |
| Vcl             | 998  | 0.75 | 0.25 | NM_009502   |  |
| Aox4            | 405  | 0.75 | 0.16 | NM_023631.1 |  |
| B230353O14Rik   | 50   | 0.75 | 0.13 | AK046219    |  |
| Trim35          | 119  | 0.75 | 0.22 | NM_029979   |  |
| LOC382100       | 68   | 0.75 | 0.27 | XM_356181.1 |  |
| 4930511J15Rik   | 49   | 0.75 | 0.25 | AK015758    |  |
| Tomm20          | 33   | 0.75 | 0.30 | NM_024214   |  |
| Cpsf6           | 391  | 0.75 | 0.10 |             |  |
| Lpin2           | 67   | 0.75 | 0.21 | NM_022882   |  |
| Kcnu1           | 163  | 0.75 | 0.11 |             |  |
| Rab18           | 543  | 0.75 | 0.16 | NM_011225   |  |
| 5730427M17Rik   | 37   | 0.75 | 0.16 | NM_175297.2 |  |
| Bcl11b          | 31   | 0.75 | 0.38 | NM_021399.1 |  |
| Oxr1            | 216  | 0.75 | 0.22 | AK040881    |  |
| AK122525        | 80   | 0.75 | 0.16 | NM_199028.1 |  |
| A830048E23Rik   | 73   | 0.75 | 0.11 | AK043900    |  |
| Gpatch2         | 1007 | 0.75 | 0.13 |             |  |
| A030012M09Rik   | 138  | 0.75 | 0.14 | NM_183028.1 |  |
| 1110034C16Rik   | 39   | 0.75 | 0.20 |             |  |
| D230020C06Rik   | 58   | 0.75 | 0.36 | AK051933    |  |
| Cbfa2t2h        | 84   | 0.75 | 0.14 | NM_172860.1 |  |
| Dpp6            | 94   | 0.75 | 0.06 | NM_010075   |  |
| 1600021C16Rik   | 712  | 0.75 | 0.24 | NM_028059.1 |  |
| B430306D02Rik   | 57   | 0.75 | 0.22 | XM_194622   |  |
| Btbd3           | 618  | 0.75 | 0.20 | NM_145534.1 |  |
| 5830405N20Rik   | 43   | 0.75 | 0.11 | NM_183264.1 |  |
| Ankra2          | 323  | 0.75 | 0.14 | AK003438    |  |
| LOC216089       | 295  | 0.75 | 0.19 | XM_125658.2 |  |
| Al429214        | 42   | 0.75 | 0.31 |             |  |
| Stag2           | 1294 | 0.75 | 0.24 | NM_021465.2 |  |
| Fancm           | 385  | 0.75 | 0.21 |             |  |
| Arhgap24        | 260  | 0.75 | 0.17 | NM_029270.1 |  |
| Igfbp5          | 5003 | 0.75 | 0.26 | NM_010518   |  |
| Rab36           | 161  | 0.75 | 0.04 | XM_125709.3 |  |
| LOC381533       | 37   | 0.75 | 0.14 | XM_355501.1 |  |
| B930096H04Rik   | 143  | 0.75 | 0.11 | AK047594    |  |
| Cyb5d1          | 43   | 0.75 | 0.10 |             |  |
| Trim10          | 52   | 0.75 | 0.13 | NM_011280.1 |  |
| A130027D22Rik   | 64   | 0.75 | 0.28 | AK037575    |  |
| Cpsf3           | 34   | 0.75 | 0.15 | NM_018813.2 |  |
| Hist1h1d        | 50   | 0.75 | 0.02 | NM_145713.2 |  |
| Akap11          | 615  | 0.75 | 0.03 | XM_127854   |  |
| 4632417D23      | 80   | 0.75 | 0.11 | NM_172934.1 |  |
| 5730497N03Rik   | 82   | 0.75 | 0.36 |             |  |
| Pip5k3          | 62   | 0.75 | 0.33 | NM_011086.1 |  |
| C130015E15Rik   | 42   | 0.75 | 0.40 | AK081413    |  |
| A730024A03Rik   | 936  | 0.75 | 0.18 | XM_109657   |  |
| 1810041M07Rik   | 110  | 0.74 | 0.19 | AK007746    |  |
| Klhdc1          | 243  | 0.74 | 0.08 | NM_178253.2 |  |
| 4832406C22      | 250  | 0.74 | 0.08 | NM_173395.1 |  |
| LOC381979       | 36   | 0.74 | 0.03 | XM_356021.1 |  |
| Pcdhb21         | 39   | 0.74 | 0.54 | NM_053146.1 |  |
| LOC215086       | 62   | 0.74 | 0.26 | XM_137083.3 |  |
| 9930013B11Rik   | 75   | 0.74 | 0.21 | AK036805    |  |
| A430083I17Rik   | 79   | 0.74 | 0.14 | AK040290    |  |
| scl0002387.1_74 | 145  | 0.74 | 0.16 |             |  |
| Gm1568          | 37   | 0.74 | 0.13 |             |  |
| scl0003774.1_10 | 33   | 0.74 | 0.23 |             |  |

|                |      |      |      |             |  |
|----------------|------|------|------|-------------|--|
| LOC386169      | 227  | 0.74 | 0.14 | XM_359104.1 |  |
| 3110078M01Rik  | 703  | 0.74 | 0.11 |             |  |
| 9430064K01Rik  | 85   | 0.74 | 0.07 |             |  |
| Zfp715         | 325  | 0.74 | 0.19 |             |  |
| Ahi1           | 2049 | 0.74 | 0.11 | NM_026203.1 |  |
| 2610307O08Rik  | 71   | 0.74 | 0.29 | XM_128954.3 |  |
| D230005D02Rik  | 551  | 0.74 | 0.04 | NM_172813.1 |  |
| Strn3          | 1334 | 0.74 | 0.19 | NM_052973   |  |
| Mzf1           | 63   | 0.74 | 0.20 |             |  |
| D12Ert551e     | 135  | 0.74 | 0.29 | NM_028731.2 |  |
| Hif1a          | 154  | 0.74 | 0.27 | NM_010431.1 |  |
| LOC238678      | 36   | 0.74 | 0.18 | XM_138664.2 |  |
| Zfp608         | 189  | 0.74 | 0.09 | NM_175751.2 |  |
| Gca            | 270  | 0.74 | 0.13 | NM_145523.2 |  |
| AW049765       | 31   | 0.74 | 0.24 | NM_145934   |  |
| A630020C16Rik  | 113  | 0.74 | 0.16 | AK041541    |  |
| 1810007M14Rik  | 316  | 0.74 | 0.19 | NM_026110.1 |  |
| A430109M19Rik  | 206  | 0.74 | 0.27 |             |  |
| C030003A18Rik  | 633  | 0.74 | 0.20 | AK047623    |  |
| 9130409I23Rik  | 33   | 0.74 | 0.08 |             |  |
| C430015M08Rik  | 53   | 0.74 | 0.08 | AK049476    |  |
| D130043K22Rik  | 126  | 0.74 | 0.06 | XM_111397.3 |  |
| Sgtb           | 109  | 0.74 | 0.09 | NM_144838.1 |  |
| C730013O11Rik  | 166  | 0.74 | 0.34 | AK050083    |  |
| Smarca3        | 97   | 0.74 | 0.22 | NM_009210   |  |
| 5730412N02Rik  | 84   | 0.74 | 0.18 | XM_485819   |  |
| BC028799       | 221  | 0.74 | 0.14 | XM_135033.2 |  |
| Shd            | 36   | 0.74 | 0.16 | NM_009168   |  |
| 2210411A11Rik  | 43   | 0.74 | 0.18 |             |  |
| BC062127       | 39   | 0.74 | 0.59 |             |  |
| Hic2           | 114  | 0.74 | 0.24 | NM_178922   |  |
| 1810045J01Rik  | 127  | 0.74 | 0.20 | NM_199027.1 |  |
| 4631422C13Rik  | 101  | 0.74 | 0.07 | XM_128857.3 |  |
| AW011752       | 485  | 0.74 | 0.24 | NM_134034.1 |  |
| A530010L13Rik  | 46   | 0.74 | 0.18 | AK040666    |  |
| Atp7a          | 116  | 0.74 | 0.19 | NM_009726.2 |  |
| Slc25a12       | 907  | 0.74 | 0.04 | NM_172436.2 |  |
| Nckap1         | 2082 | 0.74 | 0.21 | NM_016965.1 |  |
| 4930402E16Rik  | 80   | 0.74 | 0.18 | NM_198308.1 |  |
| Olfir692       | 31   | 0.74 | 0.26 | NM_146355.1 |  |
| LOC233401      | 682  | 0.74 | 0.21 | XM_133561.4 |  |
| 9630044O09Rik  | 51   | 0.74 | 0.44 | NM_198014.1 |  |
| Itgav          | 45   | 0.74 | 0.25 | AK020674    |  |
| Pgrmc1         | 2493 | 0.74 | 0.11 | NM_016783.2 |  |
| 2610012I03Rik  | 126  | 0.74 | 0.15 |             |  |
| Nrxn1          | 45   | 0.74 | 0.13 | NM_020252.1 |  |
| LOC213784      | 33   | 0.74 | 0.38 | XM_131338.2 |  |
| A730091E08Rik  | 116  | 0.74 | 0.07 | NM_176917.2 |  |
| Nsdhl          | 260  | 0.74 | 0.21 | NM_010941.3 |  |
| Chdc1          | 69   | 0.74 | 0.11 | XM_484393   |  |
| Depdc1b        | 75   | 0.74 | 0.08 | NM_178683.2 |  |
| LOC380629      | 90   | 0.74 | 0.17 | XM_354533.1 |  |
| Prlr           | 2037 | 0.74 | 0.10 | AK042147    |  |
| Glr3           | 161  | 0.74 | 0.29 | NM_010298.2 |  |
| Rfxdc2         | 38   | 0.74 | 0.56 |             |  |
| BC051080       | 277  | 0.74 | 0.09 | NM_183172.1 |  |
| Nt5dc3         | 50   | 0.74 | 0.22 |             |  |
| Scn3b          | 32   | 0.74 | 0.24 | NM_178227   |  |
| Acat3          | 38   | 0.74 | 0.09 | NM_153151   |  |
| 4933403H06Rik  | 36   | 0.74 | 0.32 | NM_028938.1 |  |
| A430106D13Rik  | 282  | 0.74 | 0.16 | AK040551    |  |
| Herc3          | 121  | 0.74 | 0.25 | NM_028705.2 |  |
| scl0002779.1_2 | 32   | 0.74 | 0.34 |             |  |
| Gucy1b3        | 109  | 0.74 | 0.15 | NM_017469.2 |  |
| LOC209405      | 346  | 0.74 | 0.06 | XM_142315.2 |  |
| Lrfr3          | 187  | 0.74 | 0.18 | NM_175478   |  |
| Zc3h7a         | 1328 | 0.74 | 0.14 |             |  |
| 1700021P10Rik  | 37   | 0.74 | 0.35 | AK006228    |  |

|               |      |      |      |             |  |
|---------------|------|------|------|-------------|--|
| Acox3         | 32   | 0.74 | 0.11 | NM_030721.2 |  |
| Trim2         | 104  | 0.74 | 0.04 | AK039741    |  |
| LOC386094     | 73   | 0.74 | 0.22 | XM_359067.1 |  |
| Syt1          | 1239 | 0.74 | 0.13 | AK013798    |  |
| Dnaja2        | 149  | 0.74 | 0.21 | NM_019794.1 |  |
| Gpr180        | 69   | 0.74 | 0.06 |             |  |
| 9430025M13Rik | 82   | 0.74 | 0.24 | XM_133396.3 |  |
| Impa1         | 78   | 0.74 | 0.28 | NM_018864.3 |  |
| Eif2c4        | 32   | 0.74 | 0.11 | NM_153177.1 |  |
| Apc           | 104  | 0.74 | 0.14 | NM_007462   |  |
| Sesn3         | 37   | 0.73 | 0.26 | NM_030261   |  |
| A930039N10Rik | 156  | 0.73 | 0.08 |             |  |
| Fbxo8         | 198  | 0.73 | 0.11 | NM_015791.2 |  |
| A130033B22    | 45   | 0.73 | 0.20 | NM_177825.2 |  |
| LOC385206     | 188  | 0.73 | 0.08 | XM_358118.1 |  |
| AW549877      | 2814 | 0.73 | 0.12 | NM_145930   |  |
| 4933409L06Rik | 107  | 0.73 | 0.31 | XM_129509   |  |
| D930049D10Rik | 45   | 0.73 | 0.17 | AK053096    |  |
| E330027P06Rik | 103  | 0.73 | 0.16 | AK054460    |  |
| Bmpr2         | 103  | 0.73 | 0.04 | NM_007561.1 |  |
| 4933406L09Rik | 49   | 0.73 | 0.33 | AK047451    |  |
| Mamdc1        | 326  | 0.73 | 0.10 | NM_207010.1 |  |
| Zfp367        | 685  | 0.73 | 0.19 | NM_175494.2 |  |
| 6030465E24Rik | 61   | 0.73 | 0.19 | XM_358346   |  |
| Mgl2          | 43   | 0.73 | 0.01 | NM_145137.1 |  |
| Svil          | 42   | 0.73 | 0.07 | NM_153153   |  |
| LOC224732     | 80   | 0.73 | 0.41 | XM_128487.2 |  |
| Jmjd1c        | 40   | 0.73 | 0.28 | NM_207221.1 |  |
| Ssh1          | 56   | 0.73 | 0.25 | NM_198109   |  |
| A330084E23Rik | 127  | 0.73 | 0.14 | AK039677    |  |
| Slc12a2       | 1920 | 0.73 | 0.12 | NM_009194.1 |  |
| BC042720      | 377  | 0.73 | 0.11 | XM_283576.2 |  |
| A830025F02Rik | 30   | 0.73 | 0.36 |             |  |
| Scn3a         | 93   | 0.73 | 0.07 | NM_018732.1 |  |
| Ebf3          | 337  | 0.73 | 0.01 | NM_010096.1 |  |
| Ccnb1         | 2109 | 0.73 | 0.03 | NM_172301.2 |  |
| Slc25a24      | 50   | 0.73 | 0.13 | NM_172685.1 |  |
| Gbe1          | 33   | 0.73 | 0.08 | AK050423    |  |
| Gnb3          | 194  | 0.73 | 0.15 | NM_013530.1 |  |
| Habp4         | 35   | 0.73 | 0.05 | NM_019986   |  |
| Alg10b        | 204  | 0.73 | 0.12 |             |  |
| C730042C24Rik | 97   | 0.73 | 0.28 | AK050383    |  |
| Aox1          | 33   | 0.73 | 0.21 | NM_009676.1 |  |
| Fbp2          | 403  | 0.73 | 0.03 | NM_007994.1 |  |
| LOC224648     | 76   | 0.73 | 0.27 | XM_128508.4 |  |
| LOC241525     | 141  | 0.73 | 0.24 | XM_141028.1 |  |
| Vti1-pending  | 48   | 0.73 | 0.21 | AK030538    |  |
| 9130023H24Rik | 35   | 0.73 | 0.08 | NM_177001.2 |  |
| 2810413I22Rik | 378  | 0.73 | 0.13 | XM_148083.1 |  |
| A230102I05Rik | 71   | 0.73 | 0.17 | NM_146179.1 |  |
| 0610007P08Rik | 136  | 0.73 | 0.19 | NM_023507.2 |  |
| 9330174H21Rik | 31   | 0.73 | 0.10 | AK034293    |  |
| Rims2         | 1020 | 0.73 | 0.12 | NM_053271   |  |
| Pitpnc1       | 36   | 0.73 | 0.03 | NM_145823.1 |  |
| LOC381445     | 56   | 0.73 | 0.14 | XM_130900.2 |  |
| Fancd2        | 300  | 0.73 | 0.19 | XM_132796.4 |  |
| Srl           | 56   | 0.73 | 0.10 |             |  |
| Rod1          | 313  | 0.73 | 0.24 | NM_144904.1 |  |
| D030059N20Rik | 80   | 0.73 | 0.18 | AK083653    |  |
| LOC381621     | 461  | 0.73 | 0.11 | XM_355579.1 |  |
| Tusc1         | 89   | 0.73 | 0.33 | NM_026954   |  |
| 2310004H21Rik | 894  | 0.73 | 0.20 | AK009138    |  |
| A530068K01    | 243  | 0.73 | 0.15 |             |  |
| 8430405D05Rik | 121  | 0.73 | 0.04 | XM_354623.1 |  |
| Scrn1         | 136  | 0.73 | 0.10 | NM_027268   |  |
| 2900022H01Rik | 37   | 0.73 | 0.04 | AK013569    |  |
| Podxl2        | 35   | 0.73 | 0.17 | NM_176973   |  |
| Pclo          | 107  | 0.73 | 0.13 | NM_011995   |  |

|                 |       |      |      |             |  |
|-----------------|-------|------|------|-------------|--|
| B130018P07Rik   | 41    | 0.73 | 0.19 | AK045005    |  |
| Ccm1            | 242   | 0.73 | 0.18 | NM_030675.2 |  |
| 2810426N06Rik   | 34    | 0.73 | 0.18 | NM_023363.1 |  |
| Glis2           | 68    | 0.73 | 0.11 | NM_031184   |  |
| LOC385780       | 11120 | 0.73 | 0.24 | XM_358943.1 |  |
| Hpcal4          | 103   | 0.73 | 0.17 | NM_174998.1 |  |
| Cadps           | 332   | 0.73 | 0.19 | NM_012061.1 |  |
| Takrp           | 518   | 0.73 | 0.22 | XM_144916   |  |
| Armcx1          | 710   | 0.73 | 0.05 | NM_030066.2 |  |
| scl0003431.1_14 | 147   | 0.73 | 0.14 |             |  |
| Suhw3           | 291   | 0.73 | 0.17 | NM_153532.2 |  |
| E030040N07Rik   | 30    | 0.73 | 0.42 | AK087267    |  |
| AB041544        | 83    | 0.73 | 0.07 | NM_021416.2 |  |
| Rasip1          | 65    | 0.73 | 0.21 | XM_485931   |  |
| Smbp            | 47    | 0.73 | 0.20 | NM_133352   |  |
| Mtrr            | 30    | 0.73 | 0.12 | NM_172480.1 |  |
| LOC380989       | 58    | 0.73 | 0.34 | XM_354900.1 |  |
| Aco1            | 105   | 0.73 | 0.08 | NM_007386.1 |  |
| 2300008H03Rik   | 56    | 0.73 | 0.27 | AK009045    |  |
| 1700030B17Rik   | 548   | 0.73 | 0.24 | NM_027407.1 |  |
| scl0004010.1_24 | 295   | 0.73 | 0.15 |             |  |
| Prei4           | 44    | 0.73 | 0.03 |             |  |
| Btg4            | 180   | 0.73 | 0.28 | NM_019493.2 |  |
| Grik5           | 98    | 0.73 | 0.15 | NM_008168   |  |
| Epim            | 56    | 0.72 | 0.20 | AK076816    |  |
| A630018G05Rik   | 50    | 0.72 | 0.21 | XM_132483.4 |  |
| F830029L24Rik   | 1459  | 0.72 | 0.17 | NM_172606.1 |  |
| Pou6f1          | 163   | 0.72 | 0.16 | NM_010127.2 |  |
| Lrrc8b          | 39    | 0.72 | 0.30 |             |  |
| 2810470D21Rik   | 487   | 0.72 | 0.16 | XM_125812.4 |  |
| LOC383090       | 66    | 0.72 | 0.34 | XM_356864.1 |  |
| Sec23a          | 175   | 0.72 | 0.26 | NM_009147.1 |  |
| C77080          | 67    | 0.72 | 0.03 | XM_110498   |  |
| Wig1            | 566   | 0.72 | 0.14 | NM_009517.1 |  |
| Dspp            | 33    | 0.72 | 0.21 | NM_010080.1 |  |
| Dleu7           | 119   | 0.72 | 0.08 |             |  |
| Vangl1          | 36    | 0.72 | 0.28 | NM_177545   |  |
| Bri3bp          | 49    | 0.72 | 0.08 | XM_132386.4 |  |
| Bmpr1a          | 665   | 0.72 | 0.15 | NM_009758.3 |  |
| 6030490B17Rik   | 31    | 0.72 | 0.33 |             |  |
| LOC381224       | 51    | 0.72 | 0.08 | XM_140772.3 |  |
| Sfrs7           | 1409  | 0.72 | 0.11 | NM_146083.1 |  |
| 9430036F11Rik   | 272   | 0.72 | 0.25 | AK034776    |  |
| BC021381        | 98    | 0.72 | 0.05 | NM_145382.2 |  |
| 9630015D15Rik   | 1845  | 0.72 | 0.06 | NM_181401   |  |
| 5430404L10Rik   | 47    | 0.72 | 0.08 | NM_025769.1 |  |
| D630029K19Rik   | 88    | 0.72 | 0.13 | NM_172679.1 |  |
| Ptprg           | 37    | 0.72 | 0.10 | AK053271    |  |
| Pcdha8          | 85    | 0.72 | 0.28 | NM_201243   |  |
| Cpeb4           | 181   | 0.72 | 0.21 | NM_026252.1 |  |
| 4933407H18Rik   | 73    | 0.72 | 0.07 | XM_132005   |  |
| Hps3            | 125   | 0.72 | 0.10 | AK037829    |  |
| Plcb4           | 53    | 0.72 | 0.22 | NM_013829.1 |  |
| Rnase1          | 42    | 0.72 | 0.13 | NM_011271.2 |  |
| D330044F14Rik   | 50    | 0.72 | 0.22 | AK084796    |  |
| A130010C12Rik   | 1022  | 0.72 | 0.16 |             |  |
| scl0003723.1_3  | 178   | 0.72 | 0.10 |             |  |
| Ky              | 108   | 0.72 | 0.14 | AK047076    |  |
| Jmjd2a          | 58    | 0.72 | 0.15 | NM_172382   |  |
| 5330414D10Rik   | 402   | 0.72 | 0.08 | NM_153594.2 |  |
| 5830427D03Rik   | 87    | 0.72 | 0.20 | NM_175232.2 |  |
| LOC381603       | 68    | 0.72 | 0.25 | XM_355558.1 |  |
| Kiaa0298-hp     | 30    | 0.72 | 0.38 | NM_181853.1 |  |
| B230323D24Rik   | 81    | 0.72 | 0.13 | AK045917    |  |
| D330048F12Rik   | 86    | 0.72 | 0.20 | AK052386    |  |
| Ncoa2           | 85    | 0.72 | 0.16 | NM_008678   |  |
| Top2b           | 127   | 0.72 | 0.32 | NM_009409.2 |  |
| Pde1c           | 95    | 0.72 | 0.28 | NM_011054   |  |

|                  |      |      |      |             |  |
|------------------|------|------|------|-------------|--|
| Spint1           | 42   | 0.72 | 0.10 | NM_016907   |  |
| LOC228536        | 89   | 0.72 | 0.18 | XM_130491.3 |  |
| Mast1            | 87   | 0.72 | 0.09 | NM_019945.1 |  |
| Fbxl3a           | 237  | 0.72 | 0.10 | NM_015822.1 |  |
| Zfp354a          | 93   | 0.72 | 0.06 | NM_009329.2 |  |
| Fhod1            | 41   | 0.72 | 0.22 | NM_177699   |  |
| Grm5             | 279  | 0.72 | 0.18 | XM_149971.3 |  |
| Cdc40            | 317  | 0.72 | 0.08 | XM_483893   |  |
| Cacna1d          | 73   | 0.72 | 0.16 | NM_028981.1 |  |
| Cited2           | 750  | 0.72 | 0.08 | NM_010828.1 |  |
| Ephb3            | 48   | 0.72 | 0.14 | NM_010143.1 |  |
| Aldh6a1          | 621  | 0.72 | 0.17 | NM_134042.1 |  |
| LOC240038        | 142  | 0.72 | 0.20 | XM_139814.4 |  |
| Olf1189          | 32   | 0.72 | 0.19 | NM_146772.1 |  |
| 4930506L13Rik    | 32   | 0.72 | 0.38 | NM_030188.2 |  |
| LOC385755        | 46   | 0.72 | 0.11 | XM_358931.1 |  |
| LOC385310        | 49   | 0.72 | 0.20 | XM_358182.1 |  |
| 2410013l23Rik    | 211  | 0.72 | 0.26 | AK035985    |  |
| Atp2a3           | 87   | 0.72 | 0.17 | NM_016745.2 |  |
| 4930503L19Rik    | 124  | 0.72 | 0.31 | NM_172967   |  |
| 4933434l06Rik    | 32   | 0.72 | 0.31 | XM_283704.1 |  |
| 5730538E15Rik    | 226  | 0.72 | 0.14 | NM_173443.1 |  |
| Gprasp2          | 991  | 0.72 | 0.11 | XM_142154.2 |  |
| A230075C01Rik    | 269  | 0.72 | 0.18 | AK038916    |  |
| LOC386244        | 108  | 0.72 | 0.11 | XM_359136.1 |  |
| LOC386506        | 57   | 0.72 | 0.20 | XM_359354.1 |  |
| 6530405K15Rik    | 31   | 0.72 | 0.13 | AK032664    |  |
| Prpf39           | 106  | 0.72 | 0.49 | NM_177806.2 |  |
| Dock9            | 39   | 0.71 | 0.31 | XM_358315   |  |
| Msh3             | 50   | 0.71 | 0.28 | NM_010829.1 |  |
| V1rd6            | 957  | 0.71 | 0.17 | NM_030738.1 |  |
| Rusc2            | 86   | 0.71 | 0.04 | XM_131380.3 |  |
| Tmprss7          | 64   | 0.71 | 0.16 | NM_172455   |  |
| D4Erttd681e      | 209  | 0.71 | 0.22 |             |  |
| Dst              | 218  | 0.71 | 0.09 | XM_149027.1 |  |
| Zfp160           | 253  | 0.71 | 0.22 | NM_145483.1 |  |
| 2310012P17Rik    | 39   | 0.71 | 0.35 | NM_027142.1 |  |
| Bcar3            | 66   | 0.71 | 0.15 | AK015763    |  |
| 4921532K09Rik    | 36   | 0.71 | 0.54 | NM_026149.2 |  |
| Pkp2             | 52   | 0.71 | 0.20 | NM_026163.1 |  |
| Braf             | 209  | 0.71 | 0.12 | XM_355754   |  |
| A930002F06Rik    | 81   | 0.71 | 0.09 | AK044226    |  |
| LOC331752        | 42   | 0.71 | 0.20 | XM_284930.2 |  |
| Papolg           | 456  | 0.71 | 0.23 | NM_172555.1 |  |
| Tph1             | 37   | 0.71 | 0.22 | NM_009414.1 |  |
| A930026H04Rik    | 33   | 0.71 | 0.20 | AK044604    |  |
| C130020O07Rik    | 36   | 0.71 | 0.15 | AK047905    |  |
| Shrm             | 68   | 0.71 | 0.14 |             |  |
| Cenpf            | 93   | 0.71 | 0.29 | XM_129658.4 |  |
| LOC386063        | 61   | 0.71 | 0.43 | XM_359050.1 |  |
| Idh1             | 1301 | 0.71 | 0.23 | NM_010497   |  |
| Bhc80            | 53   | 0.71 | 0.04 | NM_138755.1 |  |
| Zfp52            | 63   | 0.71 | 0.31 | NM_144515.1 |  |
| LOC381609        | 90   | 0.71 | 0.23 | XM_355565.1 |  |
| Pxn              | 42   | 0.71 | 0.12 | NM_133915.1 |  |
| Pace4            | 103  | 0.71 | 0.22 | XM_355911.1 |  |
| Pitpnm2          | 3668 | 0.71 | 0.10 | NM_011256.1 |  |
| 1810009B06Rik    | 43   | 0.71 | 0.25 | NM_026192.1 |  |
| Stag1            | 127  | 0.71 | 0.16 | AK043215    |  |
| 2810002O09Rik    | 38   | 0.71 | 0.16 | NM_175179   |  |
| scl0002084.1_607 | 132  | 0.71 | 0.15 |             |  |
| C130074J06Rik    | 30   | 0.71 | 0.23 | AK081759    |  |
| Grip1            | 114  | 0.71 | 0.03 | NM_133442.1 |  |
| LOC244666        | 33   | 0.71 | 0.20 | XM_146570.2 |  |
| Emb              | 618  | 0.71 | 0.05 | NM_010330.2 |  |
| Ripk5            | 65   | 0.71 | 0.27 | NM_172516.2 |  |
| Rbms2            | 47   | 0.71 | 0.12 | NM_019711.1 |  |
| Il1rap           | 341  | 0.71 | 0.21 | NM_134103.1 |  |

|                 |      |      |      |             |  |
|-----------------|------|------|------|-------------|--|
| Usp40           | 88   | 0.71 | 0.18 | XM_129956.2 |  |
| B230330J24Rik   | 32   | 0.71 | 0.50 | AK045983    |  |
| D7Erttd743e     | 267  | 0.71 | 0.19 | NM_153525.2 |  |
| Gats            | 291  | 0.71 | 0.11 | XM_289726.2 |  |
| Zap70           | 84   | 0.71 | 0.19 | NM_009539.2 |  |
| C130086J11Rik   | 44   | 0.71 | 0.16 | AK081910    |  |
| Pcf11           | 365  | 0.71 | 0.14 |             |  |
| Tmem136         | 128  | 0.71 | 0.24 |             |  |
| 1700071K18Rik   | 48   | 0.71 | 0.14 | XM_133916.4 |  |
| Ogt             | 612  | 0.71 | 0.15 | NM_139144.2 |  |
| A630024K09Rik   | 37   | 0.71 | 0.17 | AK041609    |  |
| Usp13           | 40   | 0.71 | 0.25 | XM_130826.3 |  |
| 4930403C10Rik   | 37   | 0.71 | 0.07 | XM_356034.1 |  |
| Tlr4            | 161  | 0.71 | 0.20 | NM_021297.1 |  |
| Dyrk2           | 155  | 0.71 | 0.30 |             |  |
| Copg2           | 188  | 0.71 | 0.17 | AK079599    |  |
| Lgi2            | 43   | 0.71 | 0.10 | NM_144945   |  |
| Zfp189          | 119  | 0.71 | 0.29 | NM_145547.1 |  |
| Celsr2          | 119  | 0.71 | 0.14 | NM_017392.2 |  |
| Jph1            | 147  | 0.71 | 0.27 | NM_020604.1 |  |
| Nt5c2           | 426  | 0.71 | 0.10 | NM_029810.2 |  |
| 2400003L07Rik   | 90   | 0.71 | 0.24 | NM_178378.2 |  |
| AW124722        | 32   | 0.71 | 0.51 | XM_139515.3 |  |
| Map4k3          | 584  | 0.71 | 0.04 | XM_128800.4 |  |
| D330050I23Rik   | 300  | 0.71 | 0.24 | NM_207269.1 |  |
| A130030D10Rik   | 40   | 0.71 | 0.26 | NM_177783.2 |  |
| Snrpn           | 209  | 0.71 | 0.16 | AF332579    |  |
| scl0001371.1_19 | 204  | 0.71 | 0.13 |             |  |
| Rufy3           | 314  | 0.71 | 0.19 |             |  |
| Cst7            | 33   | 0.71 | 0.32 | NM_009977.1 |  |
| Ect2            | 247  | 0.71 | 0.26 | AK040174    |  |
| Tacc3           | 65   | 0.71 | 0.06 | NM_011524.1 |  |
| Acvr2           | 99   | 0.71 | 0.28 | NM_007396.2 |  |
| C230091E03Rik   | 813  | 0.71 | 0.19 | AK082704    |  |
| 2010011I20Rik   | 339  | 0.71 | 0.13 | NM_025912.2 |  |
| Esrrg           | 44   | 0.71 | 0.05 | NM_011935.1 |  |
| Plekhb2         | 5115 | 0.71 | 0.13 | NM_145516.1 |  |
| D030032D21Rik   | 292  | 0.71 | 0.10 | AK083499    |  |
| Jak1            | 117  | 0.70 | 0.20 | AK033004    |  |
| 9630013A09Rik   | 623  | 0.70 | 0.10 | AK035873    |  |
| 2310005C01Rik   | 85   | 0.70 | 0.27 |             |  |
| 2310067L16Rik   | 115  | 0.70 | 0.05 | XM_193814.2 |  |
| C920006C10Rik   | 516  | 0.70 | 0.15 | NM_133766.1 |  |
| Tnfrsf25        | 66   | 0.70 | 0.13 | NM_033042   |  |
| Dgcr8           | 138  | 0.70 | 0.14 | NM_033324.2 |  |
| Prdm8           | 34   | 0.70 | 0.26 | NM_029947   |  |
| 3110048E14Rik   | 61   | 0.70 | 0.02 | NM_133750.2 |  |
| BC007180        | 44   | 0.70 | 0.17 | XM_131217   |  |
| LOC233053       | 36   | 0.70 | 0.15 | XM_133332.3 |  |
| Prkdc           | 316  | 0.70 | 0.20 | NM_011159.1 |  |
| LOC277231       | 2165 | 0.70 | 0.20 | XM_203691.3 |  |
| Rab11a          | 587  | 0.70 | 0.04 | NM_017382.2 |  |
| 9130223C08Rik   | 126  | 0.70 | 0.09 |             |  |
| AW125296        | 2941 | 0.70 | 0.21 |             |  |
| Mtus1           | 84   | 0.70 | 0.07 | NM_178902.3 |  |
| LOC385992       | 35   | 0.70 | 0.17 | XM_359028.1 |  |
| Plk4            | 89   | 0.70 | 0.20 | NM_173169.1 |  |
| Gng4            | 667  | 0.70 | 0.08 | NM_010317.2 |  |
| D030040K20Rik   | 43   | 0.70 | 0.20 | AK050932    |  |
| Nbr1            | 387  | 0.70 | 0.21 | NM_008676.1 |  |
| BC023928        | 697  | 0.70 | 0.18 |             |  |
| Kif24           | 45   | 0.70 | 0.11 | NM_145101.1 |  |
| 4732471D19Rik   | 518  | 0.70 | 0.05 | NM_176987.2 |  |
| A630082K20Rik   | 967  | 0.70 | 0.18 | XM_145254.3 |  |
| scl0002785.1_49 | 40   | 0.70 | 0.09 |             |  |
| Arhgap12        | 563  | 0.70 | 0.16 | NM_029277.1 |  |
| 4933400K24Rik   | 36   | 0.70 | 0.17 | NM_198623.1 |  |
| B130017N24Rik   | 37   | 0.70 | 0.13 | AK044987    |  |

|                 |      |      |      |             |  |
|-----------------|------|------|------|-------------|--|
| Kcnq1           | 37   | 0.70 | 0.25 | NM_008434.1 |  |
| Mrs2l           | 61   | 0.70 | 0.22 |             |  |
| Nfya            | 158  | 0.70 | 0.21 | NM_010913   |  |
| Ugp2            | 284  | 0.70 | 0.12 | NM_139297.2 |  |
| 2810453L12Rik   | 98   | 0.70 | 0.18 | XM_131155.3 |  |
| scl0004023.1_57 | 151  | 0.70 | 0.12 |             |  |
| Pdk1            | 1144 | 0.70 | 0.08 | NM_172665.1 |  |
| C330016F22Rik   | 32   | 0.70 | 0.07 | AK049243    |  |
| Kif16b          | 164  | 0.70 | 0.16 | XM_141392.3 |  |
| Nid2            | 3353 | 0.70 | 0.17 | NM_008695.1 |  |
| E530011J04Rik   | 115  | 0.70 | 0.19 | AK089133    |  |
| 4932409G17Rik   | 63   | 0.70 | 0.02 | AK029945    |  |
| BC010552        | 58   | 0.70 | 0.21 | NM_145394.1 |  |
| Ptptra          | 368  | 0.70 | 0.10 | NM_008980.1 |  |
| Arid4a          | 86   | 0.70 | 0.25 | XM_354675.1 |  |
| 6430411K14Rik   | 184  | 0.70 | 0.27 |             |  |
| 2900019J01Rik   | 96   | 0.70 | 0.12 | AK013560    |  |
| E430026H10Rik   | 235  | 0.70 | 0.13 |             |  |
| Tax1bp1         | 3410 | 0.70 | 0.12 | NM_025816.1 |  |
| Taf4b           | 43   | 0.70 | 0.43 | XM_128905.3 |  |
| Hcapg-pending   | 98   | 0.69 | 0.15 | AK017756    |  |
| 2410066K11Rik   | 40   | 0.69 | 0.33 | XM_130319.3 |  |
| Slco1a5         | 31   | 0.69 | 0.06 | NM_130861.1 |  |
| B930083E23Rik   | 80   | 0.69 | 0.21 | AK047526    |  |
| Irs2            | 1216 | 0.69 | 0.09 |             |  |
| C530009C10Rik   | 74   | 0.69 | 0.21 | XM_148467.1 |  |
| Bnip3           | 51   | 0.69 | 0.12 | NM_009760.2 |  |
| 4930544G21Rik   | 35   | 0.69 | 0.13 | NM_172430   |  |
| Dock11          | 393  | 0.69 | 0.12 | XM_486647   |  |
| E130103I17Rik   | 167  | 0.69 | 0.15 | NM_181316.3 |  |
| Slc44a1         | 76   | 0.69 | 0.17 |             |  |
| 6030434H13Rik   | 48   | 0.69 | 0.26 | AK031451    |  |
| 2510042P03Rik   | 311  | 0.69 | 0.08 | XM_485010   |  |
| Mid2            | 423  | 0.69 | 0.19 | AK085856    |  |
| Tdrd9           | 47   | 0.69 | 0.03 | XM_127120.2 |  |
| LOC381285       | 135  | 0.69 | 0.27 | XM_355225.1 |  |
| 5031439A09Rik   | 48   | 0.69 | 0.10 | NM_026582.2 |  |
| Dock4           | 53   | 0.69 | 0.03 | XM_358307   |  |
| 5830482F20Rik   | 30   | 0.69 | 0.29 | NM_177158.2 |  |
| 1810058K22Rik   | 46   | 0.69 | 0.11 | XM_147917.1 |  |
| scl0002558.1_69 | 305  | 0.69 | 0.07 |             |  |
| 4930442L21Rik   | 54   | 0.69 | 0.22 | NM_026253.2 |  |
| 0610041E09Rik   | 324  | 0.69 | 0.24 | NM_025335   |  |
| 2500004H21Rik   | 85   | 0.69 | 0.10 | AK010874    |  |
| LOC236262       | 32   | 0.69 | 0.41 | XM_135584.2 |  |
| LOC382896       | 36   | 0.69 | 0.30 | XM_356740.1 |  |
| Zdhhc18         | 46   | 0.69 | 0.17 |             |  |
| Cdh2            | 199  | 0.69 | 0.21 | AK084821    |  |
| Rorc            | 56   | 0.69 | 0.17 | NM_011281.1 |  |
| 6330416L11Rik   | 44   | 0.69 | 0.07 | NM_027518.1 |  |
| LOC268597       | 52   | 0.69 | 0.19 | XM_193164.2 |  |
| Arvcf           | 32   | 0.69 | 0.07 | AK053865    |  |
| Sc4mol          | 263  | 0.69 | 0.11 | NM_025436.1 |  |
| 1110033M05Rik   | 122  | 0.69 | 0.09 | XM_193728   |  |
| Cobll1          | 355  | 0.69 | 0.12 | NM_177025   |  |
| LOC386298       | 32   | 0.69 | 0.40 | XM_359163.1 |  |
| 9630025O15Rik   | 37   | 0.69 | 0.14 | AK035999    |  |
| LOC192775       | 109  | 0.69 | 0.11 | XM_112511.2 |  |
| 2810409M01Rik   | 35   | 0.69 | 0.27 | AK013060    |  |
| Xlr4a           | 36   | 0.69 | 0.37 |             |  |
| BB128963        | 70   | 0.69 | 0.22 | NM_172742   |  |
| Nap1l3          | 97   | 0.69 | 0.20 | NM_138742.1 |  |
| 1700015F03Rik   | 87   | 0.69 | 0.20 | AK005991    |  |
| Rkhd2           | 227  | 0.69 | 0.15 | XM_140436.5 |  |
| AI316802        | 95   | 0.69 | 0.21 |             |  |
| Phf6            | 809  | 0.69 | 0.25 | NM_027642.1 |  |
| LOC236864       | 35   | 0.69 | 0.12 | XM_135925.3 |  |
| Acrbp           | 33   | 0.69 | 0.04 | NM_016845.1 |  |



|                |      |      |      |             |  |
|----------------|------|------|------|-------------|--|
| Peg13          | 32   | 0.69 | 0.28 |             |  |
| 9530014D17Rik  | 349  | 0.69 | 0.05 | AK035315    |  |
| A630026H08Rik  | 35   | 0.69 | 0.12 | NM_175689.2 |  |
| Zfp748         | 50   | 0.69 | 0.18 |             |  |
| LOC383860      | 107  | 0.69 | 0.27 | XM_130885.4 |  |
| Wdfy3          | 44   | 0.69 | 0.15 | NM_172882.2 |  |
| Birc1b         | 104  | 0.69 | 0.09 | NM_010872.1 |  |
| LOC381946      | 264  | 0.69 | 0.21 | XM_358681.1 |  |
| 8030402P03Rik  | 53   | 0.69 | 0.51 | AK078743    |  |
| E430025E21Rik  | 178  | 0.69 | 0.23 | NM_153548.2 |  |
| LOC381443      | 39   | 0.69 | 0.16 | XM_355399.1 |  |
| Col11a1        | 38   | 0.69 | 0.05 | NM_007729.1 |  |
| Lfng           | 34   | 0.69 | 0.36 | NM_008494.2 |  |
| Rtn4           | 77   | 0.69 | 0.08 | NM_194051.1 |  |
| Pcdh9          | 918  | 0.69 | 0.03 | XM_139187   |  |
| A930001D11Rik  | 731  | 0.69 | 0.16 | AK044207    |  |
| LOC380617      | 90   | 0.69 | 0.14 | XM_149644.3 |  |
| 39511          | 244  | 0.69 | 0.16 |             |  |
| Phkb           | 79   | 0.69 | 0.08 | NM_199446.1 |  |
| AI428795       | 911  | 0.69 | 0.07 | NM_024477   |  |
| 4933412A06Rik  | 30   | 0.69 | 0.18 | AK030177    |  |
| Plekha5        | 46   | 0.69 | 0.13 | NM_144920.2 |  |
| 3830421F13Rik  | 101  | 0.69 | 0.06 | NM_027226.2 |  |
| 2310035C23Rik  | 161  | 0.69 | 0.16 | AK009628    |  |
| D030028A08Rik  | 38   | 0.69 | 0.06 |             |  |
| Srebf1         | 96   | 0.69 | 0.02 | NM_011480.1 |  |
| Serinc1        | 6750 | 0.69 | 0.09 |             |  |
| Cse1l          | 1741 | 0.69 | 0.21 | NM_023565.1 |  |
| Pask           | 33   | 0.68 | 0.37 | NM_080850.1 |  |
| Card11         | 82   | 0.68 | 0.31 | NM_175362.1 |  |
| Stxbp5l        | 448  | 0.68 | 0.15 | NM_172440.1 |  |
| LOC631002      | 302  | 0.68 | 0.08 |             |  |
| LOC215493      | 33   | 0.68 | 0.22 | XM_144044.2 |  |
| Negr1          | 96   | 0.68 | 0.17 | NM_177274.2 |  |
| Adcy9          | 498  | 0.68 | 0.10 | NM_009624.1 |  |
| D030016E14Rik  | 46   | 0.68 | 0.34 | NM_177240.2 |  |
| 1100001M03Rik  | 104  | 0.68 | 0.12 | AK075617    |  |
| Eif3s6         | 143  | 0.68 | 0.12 | NM_008388.1 |  |
| Mlr1           | 67   | 0.68 | 0.16 | NM_172153.1 |  |
| 6430510M02Rik  | 311  | 0.68 | 0.21 | NM_176932.2 |  |
| LOC328526      | 1100 | 0.68 | 0.03 | XM_283274.2 |  |
| 2310010P21Rik  | 94   | 0.68 | 0.06 | NM_198927   |  |
| Klhl8          | 86   | 0.68 | 0.03 | NM_178741.2 |  |
| 2610202E01Rik  | 33   | 0.68 | 0.06 | XM_131071.2 |  |
| LOC232585      | 426  | 0.68 | 0.15 | XM_145186.3 |  |
| Nfatc1         | 295  | 0.68 | 0.04 | NM_016791   |  |
| A630036P20Rik  | 249  | 0.68 | 0.27 |             |  |
| A330094N15Rik  | 72   | 0.68 | 0.26 | AK079644    |  |
| Slc7a11        | 63   | 0.68 | 0.04 | NM_011990   |  |
| Sh3kbp1        | 196  | 0.68 | 0.09 | NM_021389.3 |  |
| LOC384237      | 31   | 0.68 | 0.13 | XM_357512.1 |  |
| Rab23          | 170  | 0.68 | 0.11 | NM_008999.2 |  |
| C330027C09Rik  | 36   | 0.68 | 0.13 | NM_172616.1 |  |
| Hmx1           | 30   | 0.68 | 0.15 | NM_010445.1 |  |
| 8430403J19Rik  | 115  | 0.68 | 0.14 | AK033358    |  |
| Prkcn          | 175  | 0.68 | 0.23 | NM_029239.2 |  |
| 6330400D04     | 30   | 0.68 | 0.15 |             |  |
| Epha5          | 261  | 0.68 | 0.22 | AK034289    |  |
| Zfyve1         | 153  | 0.68 | 0.15 | NM_183154.1 |  |
| Slc33a1        | 36   | 0.68 | 0.44 | NM_015728.3 |  |
| Usp31          | 33   | 0.68 | 0.16 | XM_357781   |  |
| LOC233307      | 1068 | 0.68 | 0.22 | XM_133529.2 |  |
| IGHV8S6_U23021 | 31   | 0.68 | 0.11 |             |  |
| B230326M20Rik  | 70   | 0.68 | 0.09 | AK045953    |  |
| Crnk1l         | 164  | 0.68 | 0.22 | NM_025820.1 |  |
| 9430028F23Rik  | 36   | 0.68 | 0.32 | AK034716    |  |
| C030033M12Rik  | 160  | 0.68 | 0.22 |             |  |
| LOC381270      | 570  | 0.68 | 0.08 | XM_355213.1 |  |

|               |      |      |      |             |  |
|---------------|------|------|------|-------------|--|
| Adam4         | 34   | 0.68 | 0.03 | NM_009620.1 |  |
| 3300001A09Rik | 827  | 0.68 | 0.07 | XM_134869.3 |  |
| 1110007A06Rik | 88   | 0.68 | 0.26 | NM_024288.1 |  |
| Defb51        | 38   | 0.67 | 0.24 |             |  |
| Atp11c        | 96   | 0.67 | 0.27 | XM_135900.3 |  |
| Gpr3711       | 200  | 0.67 | 0.05 | NM_134438.1 |  |
| Ikbb          | 51   | 0.67 | 0.09 | NM_010546   |  |
| LOC193690     | 1552 | 0.67 | 0.32 | XM_111637.4 |  |
| A430010E21Rik | 143  | 0.67 | 0.39 | AK039823    |  |
| Usp38         | 190  | 0.67 | 0.22 | NM_027554.2 |  |
| 3830404O05Rik | 63   | 0.67 | 0.29 | XM_133059.2 |  |
| B930024A20Rik | 36   | 0.67 | 0.13 | AK047124    |  |
| C030034J04Rik | 42   | 0.67 | 0.22 | NM_175023.1 |  |
| Net1          | 63   | 0.67 | 0.10 | NM_019671   |  |
| Scin          | 1604 | 0.67 | 0.13 | NM_009132.1 |  |
| Ssxb2         | 58   | 0.67 | 0.16 |             |  |
| Tnrc15        | 133  | 0.67 | 0.23 | NM_146112.2 |  |
| 4932442L08Rik | 51   | 0.67 | 0.20 | XM_135972.1 |  |
| Abcc1a        | 54   | 0.67 | 0.13 | AK033750    |  |
| LOC381731     | 63   | 0.67 | 0.12 | XM_355709.1 |  |
| 2610510H01Rik | 32   | 0.67 | 0.20 | NM_173867   |  |
| Cacna1b       | 42   | 0.67 | 0.19 | NM_007579.1 |  |
| Tec           | 109  | 0.67 | 0.21 | NM_013689.2 |  |
| 9030416H16Rik | 665  | 0.67 | 0.21 | XM_358357.1 |  |
| Cpne4         | 66   | 0.67 | 0.16 | XM_135115.2 |  |
| Atad2         | 334  | 0.67 | 0.30 | NM_153199.1 |  |
| LOC229395     | 49   | 0.67 | 0.13 | XM_130929.4 |  |
| 4930403J22Rik | 163  | 0.67 | 0.15 | XM_127899.4 |  |
| 4933411B03Rik | 35   | 0.67 | 0.26 | XM_129333.4 |  |
| D10Ucla1      | 1559 | 0.67 | 0.07 | NM_178606.2 |  |
| Stam2         | 93   | 0.67 | 0.25 | NM_019667   |  |
| Plid1         | 469  | 0.67 | 0.06 | XM_130807.1 |  |
| 8030451N04Rik | 679  | 0.67 | 0.06 |             |  |
| D530007E13Rik | 45   | 0.67 | 0.35 | AK085196    |  |
| 2310004I03Rik | 423  | 0.67 | 0.04 |             |  |
| Gm608         | 50   | 0.67 | 0.27 |             |  |
| Lphn3         | 143  | 0.67 | 0.24 | XM_205556.3 |  |
| Socs2         | 725  | 0.67 | 0.08 | NM_007706.1 |  |
| Tia1          | 147  | 0.67 | 0.08 | AK009914    |  |
| Chrb1         | 33   | 0.67 | 0.10 | NM_009601.3 |  |
| LOC384313     | 45   | 0.67 | 0.34 | XM_357563.1 |  |
| AA589481      | 47   | 0.67 | 0.08 | NM_172162.1 |  |
| 2610034N15Rik | 64   | 0.67 | 0.29 |             |  |
| C230009C22Rik | 151  | 0.67 | 0.09 | AK082118    |  |
| Sytl4         | 635  | 0.67 | 0.12 | NM_013757.1 |  |
| G630023A01Rik | 96   | 0.67 | 0.28 |             |  |
| B130039D17Rik | 44   | 0.67 | 0.13 | AK045133    |  |
| Dzip1         | 33   | 0.66 | 0.17 |             |  |
| B230114P05Rik | 51   | 0.66 | 0.29 | NM_172444.1 |  |
| 1810073M12Rik | 165  | 0.66 | 0.03 | NM_181400   |  |
| E430030L01Rik | 641  | 0.66 | 0.11 | AK088897    |  |
| LOC385615     | 3211 | 0.66 | 0.18 | XM_358790.1 |  |
| C630024B01Rik | 41   | 0.66 | 0.56 | AK049953    |  |
| 9530020G05Rik | 33   | 0.66 | 0.29 | XM_145240.5 |  |
| B230209J16Rik | 178  | 0.66 | 0.10 | AK080803    |  |
| Dlgh1         | 96   | 0.66 | 0.19 | NM_007862.2 |  |
| D130040H23Rik | 32   | 0.66 | 0.16 | NM_172491.1 |  |
| Kb37          | 35   | 0.66 | 0.16 |             |  |
| E330011I20Rik | 301  | 0.66 | 0.29 | AK054295    |  |
| Zfp780b       | 135  | 0.66 | 0.21 |             |  |
| E230027K01Rik | 255  | 0.66 | 0.22 | AK054197    |  |
| Klhl7         | 2077 | 0.66 | 0.07 | NM_026448.1 |  |
| Zfp111        | 34   | 0.66 | 0.14 | NM_019940.1 |  |
| 4833416I09Rik | 93   | 0.66 | 0.06 | AK014709    |  |
| 9330186A19Rik | 980  | 0.66 | 0.13 | NM_178781.2 |  |
| 4933407L23Rik | 64   | 0.66 | 0.21 | AK030165    |  |
| Slc35a5       | 122  | 0.66 | 0.19 | NM_028756.2 |  |
| LOC213332     | 35   | 0.66 | 0.20 | XM_137057.2 |  |

|               |      |      |      |              |  |
|---------------|------|------|------|--------------|--|
| 4932441K18Rik | 859  | 0.66 | 0.09 |              |  |
| LOC382058     | 50   | 0.66 | 0.05 | XM_356133.1  |  |
| Nt5c2l1       | 73   | 0.66 | 0.02 | NM_176968.2  |  |
| B230380O10Rik | 32   | 0.66 | 0.24 | AK046412     |  |
| Usp53         | 178  | 0.66 | 0.18 | NM_133857    |  |
| LOC382221     | 31   | 0.66 | 0.56 | XM_356332.1  |  |
| LOC269628     | 41   | 0.66 | 0.08 | XM_193319.2  |  |
| AW538212      | 56   | 0.66 | 0.13 | XM_284088.2  |  |
| Zim1          | 93   | 0.66 | 0.18 | NM_011769.3  |  |
| 9530027K23Rik | 80   | 0.66 | 0.07 | NM_176838    |  |
| Rgpr          | 58   | 0.66 | 0.15 | NM_033354.2  |  |
| Ccng2         | 559  | 0.66 | 0.10 | NM_007635.2  |  |
| Ctsl          | 75   | 0.66 | 0.09 | NM_009984.2  |  |
| Kif18a        | 234  | 0.66 | 0.27 | NM_139303.1  |  |
| D330045A20Rik | 536  | 0.66 | 0.22 | NM_175326.2  |  |
| Tom1l2        | 73   | 0.66 | 0.05 | NM_153080.1  |  |
| Zfp78         | 37   | 0.66 | 0.19 | NM_177888.2  |  |
| 9630025C22    | 37   | 0.66 | 0.16 | NM_177597.2  |  |
| Arhgap19      | 31   | 0.66 | 0.38 | XM_129333    |  |
| 2610020J05Rik | 41   | 0.66 | 0.18 | AK011488     |  |
| BC027556      | 30   | 0.66 | 0.08 | NM_153558.1  |  |
| LOC384508     | 31   | 0.66 | 0.12 | XM_357681.1  |  |
| 1500017E21Rik | 42   | 0.66 | 0.21 |              |  |
| D630036G22Rik | 134  | 0.66 | 0.14 | AK085514     |  |
| 2010300C02Rik | 184  | 0.66 | 0.19 | XM_129808.3  |  |
| 2810022L02Rik | 447  | 0.66 | 0.15 | NM_144882.2  |  |
| LOC381066     | 317  | 0.66 | 0.21 | XM_354986.1  |  |
| LOC380763     | 39   | 0.66 | 0.16 | XM_358419.1  |  |
| LOC212728     | 37   | 0.66 | 0.22 | XM_134604.2  |  |
| Nol4          | 447  | 0.66 | 0.15 | NM_199024.1  |  |
| C730025B03Rik | 257  | 0.66 | 0.34 | AK050176     |  |
| Rpgr          | 41   | 0.65 | 0.22 | NM_011285.1  |  |
| Rnf38         | 100  | 0.65 | 0.25 | NM_175201    |  |
| 4933439F18Rik | 49   | 0.65 | 0.22 | AK017120     |  |
| 4933440H19Rik | 39   | 0.65 | 0.10 | NM_194335.1  |  |
| lds           | 1049 | 0.65 | 0.08 | NM_010498.1  |  |
| Ctrb1         | 32   | 0.65 | 0.28 | NM_025583.1  |  |
| Masp2         | 52   | 0.65 | 0.23 | NM_001003893 |  |
| 6030419I20Rik | 32   | 0.65 | 0.20 | AK031385     |  |
| 3110007P09Rik | 83   | 0.65 | 0.15 | NM_144906    |  |
| Zfp817        | 36   | 0.65 | 0.08 |              |  |
| Vwf           | 133  | 0.65 | 0.05 | NM_011708.2  |  |
| Olf1r91       | 33   | 0.65 | 0.16 | NM_182714.1  |  |
| Hmgcr         | 653  | 0.65 | 0.20 | XM_127496.5  |  |
| Pms1          | 39   | 0.65 | 0.35 | NM_153556.1  |  |
| Card12        | 46   | 0.65 | 0.11 | XM_197335.3  |  |
| mKIAA1686     | 36   | 0.65 | 0.06 | AK129423     |  |
| Hs3st1        | 306  | 0.65 | 0.04 | NM_010474.1  |  |
| Ythdc2        | 130  | 0.65 | 0.11 | XM_140310.4  |  |
| Ssr1          | 107  | 0.65 | 0.02 | NM_025965    |  |
| Zfp11         | 137  | 0.65 | 0.17 | NM_172462.1  |  |
| Dgkg          | 820  | 0.65 | 0.07 | NM_138650.1  |  |
| Parg          | 32   | 0.65 | 0.14 | AK080306     |  |
| B830020B14Rik | 262  | 0.65 | 0.14 | AK046833     |  |
| LOC380646     | 40   | 0.65 | 0.13 | XM_354555.1  |  |
| Tens1         | 110  | 0.65 | 0.07 | XM_109868    |  |
| 2610034N03Rik | 37   | 0.65 | 0.15 | NM_025478.2  |  |
| D230036F23Rik | 48   | 0.65 | 0.14 | AK084394     |  |
| Carf          | 34   | 0.65 | 0.19 | NM_139150.1  |  |
| 2310009M18Rik | 44   | 0.65 | 0.22 | AK009255     |  |
| C230029D21Rik | 52   | 0.65 | 0.03 | NM_177116.2  |  |
| A330086O21Rik | 39   | 0.65 | 0.23 | AK039686     |  |
| 4732496G21Rik | 51   | 0.65 | 0.35 | NM_177088.1  |  |
| AB041568      | 104  | 0.65 | 0.08 | AK089856     |  |
| Evi1          | 72   | 0.65 | 0.16 | NM_007963.1  |  |
| D030011M22Rik | 79   | 0.65 | 0.17 | AK050726     |  |
| Rps6ka5       | 95   | 0.65 | 0.14 | NM_153587.1  |  |
| E330022K08Rik | 288  | 0.65 | 0.17 | AK054402     |  |

|                  |      |      |      |             |  |
|------------------|------|------|------|-------------|--|
| scl0002434.1_7   | 42   | 0.65 | 0.23 |             |  |
| Plod2            | 280  | 0.65 | 0.15 | NM_011961   |  |
| Rab27b           | 144  | 0.64 | 0.14 | NM_030554.1 |  |
| A730024F05Rik    | 119  | 0.64 | 0.16 | NM_198295.1 |  |
| AI854408         | 102  | 0.64 | 0.29 | NM_172538.2 |  |
| E330020K23Rik    | 35   | 0.64 | 0.09 | AK087789    |  |
| 9626962_211_rc   | 167  | 0.64 | 0.05 |             |  |
| Msh2             | 49   | 0.64 | 0.18 | AK078775    |  |
| Ptpf             | 65   | 0.64 | 0.02 | NM_011213.1 |  |
| 4732474K08Rik    | 33   | 0.64 | 0.15 | AK028961    |  |
| Arhgap18         | 100  | 0.64 | 0.16 | NM_176837.1 |  |
| 0610010D24Rik    | 36   | 0.64 | 0.20 | NM_026681.1 |  |
| AK129341         | 244  | 0.64 | 0.21 |             |  |
| 1810064L21Rik    | 58   | 0.64 | 0.22 | AK007954    |  |
| AI316828         | 66   | 0.64 | 0.43 |             |  |
| scl000661.1_44   | 37   | 0.64 | 0.24 |             |  |
| Dgkh             | 74   | 0.64 | 0.01 | XM_484397   |  |
| LOC232532        | 613  | 0.64 | 0.22 | XM_132963.2 |  |
| Egr1             | 1394 | 0.64 | 0.21 | NM_007913.2 |  |
| scl0003067.1_7   | 33   | 0.64 | 0.14 |             |  |
| Mlit10           | 33   | 0.64 | 0.25 | NM_010804   |  |
| Chm              | 36   | 0.64 | 0.29 | NM_018818.1 |  |
| BC006583         | 95   | 0.64 | 0.02 | NM_145574.1 |  |
| LOC280097        | 44   | 0.64 | 0.24 | XM_207108.3 |  |
| E030045B01Rik    | 57   | 0.64 | 0.21 | AK087325    |  |
| Crbn             | 112  | 0.64 | 0.18 | NM_175357.1 |  |
| scl000981.1_40   | 183  | 0.64 | 0.06 |             |  |
| Tcra-V8          | 30   | 0.64 | 0.08 | XM_359269.1 |  |
| scl0004040.1_123 | 82   | 0.64 | 0.11 |             |  |
| scl000636.1_46   | 54   | 0.64 | 0.14 |             |  |
| C230066H01Rik    | 58   | 0.64 | 0.22 | AK082583    |  |
| A330057G13Rik    | 79   | 0.64 | 0.12 | AK039536    |  |
| Cova1            | 140  | 0.64 | 0.03 | NM_145951.2 |  |
| Usp25            | 110  | 0.64 | 0.17 | AK011798    |  |
| LOC243905        | 30   | 0.64 | 0.12 | XM_145503.2 |  |
| LOC329164        | 123  | 0.64 | 0.10 | XM_286972.2 |  |
| Nbea             | 53   | 0.64 | 0.11 | AK029239    |  |
| D930044O18Rik    | 356  | 0.64 | 0.14 | AK086668    |  |
| 5830445O15Rik    | 42   | 0.64 | 0.18 | XM_485053   |  |
| 4932415A06Rik    | 47   | 0.63 | 0.19 | XM_357975.1 |  |
| Dyrk1b           | 87   | 0.63 | 0.16 | XM_147324.1 |  |
| Fbxo32           | 367  | 0.63 | 0.05 | NM_026346.1 |  |
| scl0002050.1_27  | 130  | 0.63 | 0.14 |             |  |
| Rfx3             | 66   | 0.63 | 0.13 | NM_011265.2 |  |
| Ulk2             | 277  | 0.63 | 0.09 | NM_013881.3 |  |
| Sgip1            | 129  | 0.63 | 0.15 |             |  |
| Cic              | 135  | 0.63 | 0.25 | NM_027882.2 |  |
| Mtx2             | 40   | 0.63 | 0.25 | NM_016804.2 |  |
| E030038G15Rik    | 33   | 0.63 | 0.20 | AK053210    |  |
| Jmy              | 116  | 0.63 | 0.19 | NM_021310   |  |
| A930001N09Rik    | 40   | 0.63 | 0.13 | NM_029870.1 |  |
| A130001G05Rik    | 50   | 0.63 | 0.36 |             |  |
| 5730469D23Rik    | 40   | 0.63 | 0.33 | NM_172712   |  |
| D230019G01Rik    | 34   | 0.63 | 0.08 | AK051921    |  |
| Zfh4             | 251  | 0.63 | 0.17 | NM_030708.1 |  |
| Zfp606           | 53   | 0.63 | 0.29 | NM_026112.2 |  |
| Copb1            | 33   | 0.63 | 0.21 | NM_033370   |  |
| AV344025         | 323  | 0.63 | 0.07 | NM_178927.2 |  |
| E430033D06Rik    | 51   | 0.63 | 0.31 | AK088950    |  |
| Dsp              | 39   | 0.63 | 0.11 | XM_357804.1 |  |
| scl0002180.1_25  | 82   | 0.63 | 0.14 |             |  |
| Syt14            | 57   | 0.63 | 0.31 | NM_181546.2 |  |
| Zfp288           | 229  | 0.62 | 0.16 | AK034574    |  |
| Gyk              | 38   | 0.62 | 0.26 | NM_212444.1 |  |
| BC065085         | 230  | 0.62 | 0.07 |             |  |
| Ppap2b           | 305  | 0.62 | 0.13 | NM_080555.1 |  |
| Smchd1           | 100  | 0.62 | 0.26 |             |  |
| C230091E20Rik    | 36   | 0.62 | 0.34 | AK049009    |  |

|               |     |      |      |             |  |
|---------------|-----|------|------|-------------|--|
| LOC330267     | 120 | 0.62 | 0.11 | XM_287555.2 |  |
| D330034K12Rik | 39  | 0.62 | 0.26 | AK052345    |  |
| 1110036I07Rik | 532 | 0.62 | 0.05 |             |  |
| D17Etd488e    | 111 | 0.62 | 0.05 | NM_177465.2 |  |
| 3100003M19Rik | 56  | 0.62 | 0.20 | AK013928    |  |
| Ezh1          | 49  | 0.62 | 0.07 | NM_007970   |  |
| Gm609         | 36  | 0.62 | 0.07 |             |  |
| Pdlim4        | 48  | 0.62 | 0.28 | NM_019417.1 |  |
| 9430043H11Rik | 57  | 0.62 | 0.10 | AK034822    |  |
| LOC240456     | 40  | 0.61 | 0.14 | XM_140547.3 |  |
| 8030479K13Rik | 51  | 0.61 | 0.36 | AK033268    |  |
| Fsip1         | 41  | 0.61 | 0.20 | NM_027759.1 |  |
| Sec8          | 30  | 0.61 | 0.21 | AK014499    |  |
| Npcd          | 36  | 0.61 | 0.23 |             |  |
| AU040576      | 112 | 0.61 | 0.20 | NM_178642.3 |  |
| D14Abb1e      | 45  | 0.61 | 0.13 | XM_127656.4 |  |
| Cntn1         | 59  | 0.61 | 0.39 | NM_007727.1 |  |
| 4732477G22    | 107 | 0.61 | 0.05 | XM_355746.1 |  |
| 6430407L02Rik | 91  | 0.61 | 0.11 | AK032179    |  |
| Lin7c         | 294 | 0.61 | 0.22 | NM_011699   |  |
| C630029H24Rik | 57  | 0.61 | 0.11 | AK083224    |  |
| A430071O12Rik | 30  | 0.61 | 0.14 | AK040168    |  |
| Pik3c2a       | 313 | 0.61 | 0.17 | NM_011083.1 |  |
| Zfp667        | 67  | 0.61 | 0.03 |             |  |
| 3110045I18Rik | 105 | 0.61 | 0.05 | AK014181    |  |
| LOC381166     | 42  | 0.61 | 0.21 | XM_355088.1 |  |
| G630019A19Rik | 51  | 0.61 | 0.15 | AK090210    |  |
| LOC211085     | 35  | 0.61 | 0.06 | XM_139357.2 |  |
| B130038B15Rik | 62  | 0.61 | 0.21 |             |  |
| 5830435K17Rik | 146 | 0.61 | 0.12 | NM_175318.2 |  |
| Neurod4       | 57  | 0.61 | 0.23 | NM_007501.2 |  |
| Tbc1d12       | 96  | 0.61 | 0.19 | NM_145952.1 |  |
| 9627020_131   | 30  | 0.61 | 0.18 |             |  |
| Cdc14a        | 43  | 0.61 | 0.20 | XM_149387.3 |  |
| Cds1          | 46  | 0.61 | 0.06 | NM_173370.3 |  |
| A030006P16Rik | 108 | 0.61 | 0.09 |             |  |
| Atrx          | 80  | 0.61 | 0.36 | NM_009530.1 |  |
| A530089I17Rik | 107 | 0.60 | 0.33 | NM_133999.1 |  |
| AI987712      | 499 | 0.60 | 0.14 | NM_178921   |  |
| B230312I18Rik | 41  | 0.60 | 0.16 | NM_172740.1 |  |
| D030017L14Rik | 138 | 0.60 | 0.13 |             |  |
| ORF34         | 40  | 0.60 | 0.23 | NM_198105.1 |  |
| Slc25a30      | 73  | 0.60 | 0.26 | NM_026232.1 |  |
| Kif9          | 64  | 0.60 | 0.21 | NM_010628.1 |  |
| LOC386268     | 34  | 0.60 | 0.20 | XM_359148.1 |  |
| 9030227G01Rik | 30  | 0.60 | 0.22 | NM_177136.2 |  |
| 6030405P19Rik | 43  | 0.60 | 0.20 | AK020047    |  |
| B230309H04Rik | 56  | 0.60 | 0.15 | AK045750    |  |
| C230026C11    | 153 | 0.60 | 0.16 |             |  |
| 9430068D06Rik | 183 | 0.60 | 0.14 | AK020478    |  |
| 6720456H20Rik | 40  | 0.60 | 0.05 | NM_172600.2 |  |
| Mbd5          | 329 | 0.60 | 0.03 | XM_283719   |  |
| 6720427H10Rik | 63  | 0.60 | 0.06 |             |  |
| 9130023F12Rik | 87  | 0.60 | 0.13 | AK018647    |  |
| 9430076M13    | 82  | 0.60 | 0.16 |             |  |
| A630005A05Rik | 44  | 0.60 | 0.11 | AK041358    |  |
| 3222402P14Rik | 146 | 0.60 | 0.12 | XM_135153.4 |  |
| Ttk           | 39  | 0.60 | 0.28 | NM_009445.1 |  |
| B630005N14Rik | 118 | 0.60 | 0.29 | NM_175312.2 |  |
| 9630044E13Rik | 68  | 0.60 | 0.13 | AK036177    |  |
| BC005471      | 135 | 0.59 | 0.10 | NM_145612.1 |  |
| Gabrg3        | 50  | 0.59 | 0.20 | AK046483    |  |
| 2310034L04Rik | 111 | 0.59 | 0.06 | NM_026417   |  |
| Nap115        | 179 | 0.59 | 0.03 | NM_021432.1 |  |
| D330035D07Rik | 31  | 0.59 | 0.38 | AK052347    |  |
| 4930589M24Rik | 47  | 0.59 | 0.17 | XM_125625.2 |  |
| Trim37        | 64  | 0.59 | 0.34 | NM_197987.1 |  |
| Flrt3         | 72  | 0.59 | 0.23 | NM_178382.2 |  |

|                 |     |      |      |             |  |
|-----------------|-----|------|------|-------------|--|
| Stk32a          | 201 | 0.59 | 0.09 | NM_178749.2 |  |
| mKIAA0728       | 65  | 0.59 | 0.04 | AK129201    |  |
| Myh14           | 88  | 0.59 | 0.17 | NM_028021.1 |  |
| Man1a           | 128 | 0.59 | 0.18 | AK028996    |  |
| Cat             | 151 | 0.59 | 0.14 | NM_009804   |  |
| 4932701K03Rik   | 114 | 0.59 | 0.33 | AK077063    |  |
| Bmp8b           | 47  | 0.59 | 0.13 | NM_007559.2 |  |
| Abca8b          | 31  | 0.59 | 0.08 | NM_013851.1 |  |
| Egr2            | 31  | 0.59 | 0.33 | NM_010118.1 |  |
| Zfp758          | 54  | 0.59 | 0.19 |             |  |
| LOC382117       | 32  | 0.59 | 0.20 | XM_356203.1 |  |
| Ctcf            | 49  | 0.59 | 0.05 |             |  |
| Zap3-pending    | 39  | 0.59 | 0.04 | AK044440    |  |
| A830083H19Rik   | 67  | 0.59 | 0.15 | AK044043    |  |
| B930037P14Rik   | 46  | 0.58 | 0.13 |             |  |
| Sptlc2          | 58  | 0.58 | 0.26 | NM_011479   |  |
| Osp94           | 39  | 0.58 | 0.21 | NM_011020.3 |  |
| Cyp1b1          | 31  | 0.58 | 0.31 | NM_009994   |  |
| 6030470M02Rik   | 145 | 0.58 | 0.15 | NM_177119.2 |  |
| Pftk1           | 92  | 0.58 | 0.06 | AK083269    |  |
| Ccni            | 90  | 0.58 | 0.02 | NM_017367.2 |  |
| Actr8           | 36  | 0.58 | 0.18 | NM_027493.1 |  |
| Cbfa211h        | 337 | 0.58 | 0.16 | AK049615    |  |
| D130032118Rik   | 33  | 0.58 | 0.17 | AK051308    |  |
| St18            | 324 | 0.57 | 0.16 | NM_173868.1 |  |
| Shoc2           | 106 | 0.57 | 0.12 | NM_019658.2 |  |
| Tmeff1          | 71  | 0.57 | 0.08 | NM_021436.1 |  |
| LOC270017       | 48  | 0.57 | 0.21 | XM_194393.3 |  |
| B230369O03Rik   | 44  | 0.57 | 0.35 | AK046319    |  |
| A530021P12Rik   | 34  | 0.57 | 0.04 | AK040738    |  |
| LOC380876       | 48  | 0.57 | 0.10 | XM_354782.1 |  |
| 4921507P07Rik   | 63  | 0.57 | 0.17 | NM_027564.1 |  |
| A430075F05Rik   | 36  | 0.57 | 0.20 | AK040185    |  |
| Pik3r4          | 31  | 0.57 | 0.15 | XM_356182.1 |  |
| 9630037P07Rik   | 706 | 0.57 | 0.06 | XM_149022   |  |
| C130020P08Rik   | 42  | 0.57 | 0.20 | AK047906    |  |
| C430045L21Rik   | 33  | 0.57 | 0.18 | AK049578    |  |
| 5830467J12Rik   | 87  | 0.57 | 0.14 | XM_489373   |  |
| Mesp1           | 59  | 0.57 | 0.07 | NM_008588.1 |  |
| A530020A01Rik   | 49  | 0.56 | 0.13 | AK040719    |  |
| Zdhhc17         | 177 | 0.56 | 0.19 |             |  |
| Apoa5           | 37  | 0.56 | 0.04 | NM_080434.2 |  |
| A330049H05Rik   | 67  | 0.56 | 0.06 | AK039482    |  |
| C130022C01Rik   | 131 | 0.56 | 0.30 | AK047928    |  |
| Dppa3           | 42  | 0.56 | 0.37 | NM_139218.1 |  |
| 9130004J05Rik   | 46  | 0.56 | 0.17 |             |  |
| Polr3c          | 33  | 0.56 | 0.20 | XM_131049.2 |  |
| 6330406P08Rik   | 416 | 0.56 | 0.15 | NM_028710.1 |  |
| scl0001345.1_85 | 99  | 0.56 | 0.26 |             |  |
| B930083D07Rik   | 40  | 0.56 | 0.15 | AK047525    |  |
| LOC382017       | 38  | 0.56 | 0.08 | XM_356086.1 |  |
| Tmtc4           | 100 | 0.56 | 0.21 |             |  |
| LOC245305       | 47  | 0.56 | 0.27 | XM_143022.4 |  |
| Ghr             | 138 | 0.56 | 0.14 | AK053579    |  |
| A230069H10Rik   | 37  | 0.55 | 0.08 | AK038863    |  |
| Ccdc39          | 43  | 0.55 | 0.28 |             |  |
| LOC383304       | 57  | 0.55 | 0.14 | XM_356975.1 |  |
| A830080D01Rik   | 296 | 0.55 | 0.19 | XM_356366   |  |
| Traf3ip1        | 45  | 0.55 | 0.09 | XM_129927.2 |  |
| LOC217602       | 38  | 0.55 | 0.30 | XM_126988.2 |  |
| Tbx6            | 50  | 0.55 | 0.19 | NM_011538.1 |  |
| Nek11           | 44  | 0.55 | 0.10 | NM_172461.1 |  |
| Lrrn3           | 857 | 0.55 | 0.03 | NM_010733.2 |  |
| LOC245695       | 82  | 0.55 | 0.29 | XM_142305.2 |  |
| Ntn4            | 67  | 0.55 | 0.06 | NM_021320   |  |
| 9130427A09Rik   | 93  | 0.55 | 0.17 | NM_026240.1 |  |
| 9530051E06Rik   | 33  | 0.54 | 0.11 | AK035457    |  |
| Sfrp5           | 56  | 0.54 | 0.15 | NM_018780.2 |  |

|                  |      |      |      |             |  |
|------------------|------|------|------|-------------|--|
| LOC386101        | 33   | 0.54 | 0.19 | XM_359070.1 |  |
| 4732477G22Rik    | 1271 | 0.54 | 0.03 | AK028980    |  |
| A030001L21Rik    | 31   | 0.54 | 0.19 | AK037153    |  |
| LOC226106        | 78   | 0.54 | 0.15 | XM_123446.2 |  |
| BC023814         | 39   | 0.54 | 0.20 | NM_153562   |  |
| Ldlr             | 53   | 0.54 | 0.16 | AK018697    |  |
| 6330439K17Rik    | 42   | 0.54 | 0.31 |             |  |
| Muc1             | 44   | 0.54 | 0.25 | NM_013605.1 |  |
| LOC235860        | 43   | 0.54 | 0.08 | XM_142431.1 |  |
| Dnahc11          | 78   | 0.54 | 0.08 |             |  |
| D430033N04Rik    | 32   | 0.54 | 0.22 | NM_146039.2 |  |
| Dnajc5b          | 37   | 0.54 | 0.10 | NM_025489.2 |  |
| Insrr            | 63   | 0.54 | 0.10 | AK081512    |  |
| B230217N24Rik    | 31   | 0.54 | 0.23 | AK049011    |  |
| D10628           | 46   | 0.54 | 0.14 | XM_139876.2 |  |
| Inpp5b           | 33   | 0.53 | 0.20 | NM_008385.3 |  |
| Rreb1            | 58   | 0.53 | 0.14 |             |  |
| LOC382194        | 31   | 0.53 | 0.13 | XM_356302.1 |  |
| 6230425C21Rik    | 98   | 0.53 | 0.13 | AK012678    |  |
| Daf1             | 99   | 0.53 | 0.09 | NM_010016.1 |  |
| LOC328644        | 61   | 0.53 | 0.12 | NM_198629   |  |
| LOC215948        | 43   | 0.53 | 0.39 | XM_137067.5 |  |
| Gp1bb            | 197  | 0.53 | 0.07 | NM_010327.1 |  |
| A230057M07Rik    | 512  | 0.53 | 0.06 | AK038731    |  |
| Hpd              | 98   | 0.53 | 0.06 | NM_008277.1 |  |
| E430012K20Rik    | 47   | 0.53 | 0.18 | XM_130845.4 |  |
| Diap3            | 86   | 0.53 | 0.30 | NM_019670   |  |
| Senp6            | 32   | 0.52 | 0.05 | NM_146003.2 |  |
| E230031K19       | 185  | 0.52 | 0.09 | NM_172786.1 |  |
| Kcnq4            | 31   | 0.52 | 0.11 | XM_143960.4 |  |
| Garnl1           | 36   | 0.52 | 0.43 | NM_019994.3 |  |
| C030039L03Rik    | 31   | 0.52 | 0.35 | NM_198417.1 |  |
| Tnpo1            | 46   | 0.52 | 0.14 | NM_178716   |  |
| St8sia4          | 1094 | 0.52 | 0.09 |             |  |
| 4930513E20Rik    | 72   | 0.52 | 0.16 | XM_149158.1 |  |
| E130119H03Rik    | 30   | 0.52 | 0.48 | AK053659    |  |
| D630024O03Rik    | 30   | 0.52 | 0.27 | AK085434    |  |
| C030013C21Rik    | 34   | 0.51 | 0.14 |             |  |
| Fundc2           | 69   | 0.51 | 0.19 | NM_026126.2 |  |
| scl0002702.1_380 | 370  | 0.51 | 0.18 |             |  |
| Dock10           | 99   | 0.51 | 0.08 | XM_129913.4 |  |
| Stk39            | 1027 | 0.51 | 0.07 | NM_016866.2 |  |
| LOC381376        | 52   | 0.50 | 0.12 | XM_355341.1 |  |
| Lrch2            | 40   | 0.50 | 0.13 | XM_204439.3 |  |
| Sema5a           | 197  | 0.50 | 0.20 | AK043386    |  |
| E330029L20Rik    | 62   | 0.50 | 0.33 | AK087849    |  |
| A430107O13Rik    | 30   | 0.49 | 0.26 | AK040587    |  |
| BC024760         | 45   | 0.49 | 0.11 |             |  |
| A230013K13Rik    | 36   | 0.49 | 0.16 | AK038454    |  |
| D930028F11Rik    | 42   | 0.49 | 0.20 |             |  |
| 2210010B09Rik    | 44   | 0.49 | 0.02 | NM_172919   |  |
| 5930437C20Rik    | 34   | 0.49 | 0.15 | AK031249    |  |
| Nedd9            | 2038 | 0.49 | 0.11 | NM_017464.2 |  |
| Smc4l1           | 87   | 0.49 | 0.16 | NM_133786.3 |  |
| Rgnef            | 35   | 0.48 | 0.11 | NM_012026   |  |
| Zcchc11          | 58   | 0.47 | 0.09 | NM_175472.2 |  |
| Ccdc68           | 227  | 0.47 | 0.07 |             |  |
| Ncam2            | 66   | 0.47 | 0.10 | NM_010954.2 |  |
| Pcdh10           | 31   | 0.47 | 0.14 | NM_011043.2 |  |
| Fos              | 1436 | 0.47 | 0.14 | NM_010234.2 |  |
| D230045G11Rik    | 37   | 0.46 | 0.19 | AK052091    |  |
| LOC384189        | 57   | 0.46 | 0.16 | XM_357477.1 |  |
| Mapk10           | 38   | 0.46 | 0.15 | NM_009158   |  |
| Ccdc109a         | 81   | 0.45 | 0.22 |             |  |
| Akr1c14          | 55   | 0.45 | 0.09 |             |  |
| Pglyrp3          | 57   | 0.45 | 0.20 | NM_207247   |  |
| D030013I16Rik    | 33   | 0.45 | 0.22 |             |  |
| C430010P07Rik    | 133  | 0.44 | 0.06 | NM_177645.2 |  |

|               |     |      |      |             |  |
|---------------|-----|------|------|-------------|--|
| Chrna9        | 36  | 0.44 | 0.11 | XM_132045.2 |  |
| Plscr4        | 404 | 0.44 | 0.04 | NM_178711.2 |  |
| LOC381749     | 61  | 0.43 | 0.07 | XM_355739.1 |  |
| Zfp457        | 72  | 0.43 | 0.16 |             |  |
| 9.13002E+15   | 395 | 0.42 | 0.10 |             |  |
| 6820437F20Rik | 36  | 0.42 | 0.06 | AK078535    |  |
| 4933425I22Rik | 32  | 0.42 | 0.22 | XM_485421   |  |
| Trpc4         | 31  | 0.41 | 0.38 | NM_016984.1 |  |
| Spag6         | 39  | 0.41 | 0.25 | AK054199    |  |
| Birc1g        | 34  | 0.40 | 0.13 |             |  |
| Dixdc1        | 38  | 0.40 | 0.09 | NM_178118   |  |
| Lrrc17        | 153 | 0.40 | 0.15 |             |  |
| D130078K04Rik | 39  | 0.39 | 0.04 | AK051779    |  |
| C230009H10Rik | 163 | 0.38 | 0.12 | NM_177153.2 |  |
| Tmprss2       | 133 | 0.38 | 0.06 | NM_015775.2 |  |
| Krt1-23       | 305 | 0.38 | 0.09 | NM_033373.1 |  |
| A630064P09Rik | 34  | 0.37 | 0.16 | AK042161    |  |
| Tnrc9         | 43  | 0.36 | 0.13 | NM_172913.1 |  |
| Ptptr         | 57  | 0.34 | 0.19 | NM_021464.1 |  |
| Bmf           | 33  | 0.34 | 0.19 | NM_138313.2 |  |
| Aox3          | 50  | 0.22 | 0.07 | NM_023617.1 |  |
